# Supplementary material for: Two roles for the yeast transcription coactivator SAGA and a set of genes redundantly regulated by TFIID and SAGA
Source: eLife. 2020 Jan 8;9:e50109. doi: 10.7554/eLife.50109 (PMC6977968; doi:10.7554/eLife.50109)
Supplement: Figure 1—figure supplement 1—source data 1. [file elife-50109-fig1-figsupp1-data1.xlsx]

## Sheet: Source_Data_FigS1
gene_id	gene_name	expression_rank	Spt3_20_GC_DMSO	Spt3_20_GC_IAA	Spt3_7_GC_DMSO	Spt3_7_GC_IAA	Spt3_7_YPD_DMSO	Spt3_7_YPD_IAA	Taf13_GC_DMSO	Taf13_GC_IAA	WT_4705	WT_565	spt20_del	spt3_del	spt7_del	Taf1_YPD_DMSO	Taf1_YPD_IAA	Taf7_YPD_DMSO	Taf7_YPD_IAA	Taf13_YPD_DMSO	Taf13_YPD_IAA
YPR036W-A	SPO24	1	0.161218	0.209386	0.122189	0.255484	0.0612668	0.0520293	0.0289209	0.0678782	0.163948	0.324893	0.0753486	0.0773954	0.100332	0.102958	0.141578	0.118065	0.280463	0.110971	0.127095
YLR109W	AHP1	2	0.183629	0.141778	0.19366	0.292591	0.0569021	0.0367252	0.0480062	0.0365667	0.170017	0.292153	0.0367016	0.0840495	0.250551	0.111693	0.0101266	0.011085	0.0646124	0.263579	0.0932656
YHR179W	OYE2	3	0.182272	0.11461	0.111061	0.181919	0.0250884	0.0601026	0.0130863	0.14549	0.163575	0.126773	0.0864622	0.0743128	0.240946	0.271574	0.253251	0.233511	0.181614	0.31997	0.377287
YGR209C	TRX2	4	0.0834435	0.167734	0.0868607	0.278847	0.0797568	0.0473688	0.0124511	0.0993087	0.105921	0.0965828	0.060492	0.0967417	0.160231	0.186218	0.245258	0.298712	0.254429	0.38512	0.395719
YOL151W	GRE2	5	0.1152	0.0997913	0.0897523	0.251746	0.0506169	0.0964603	0.00807301	0.165228	0.214713	0.0433175	0.0528444	0.0732991	0.316512	0.210015	0.148943	0.24757	0.220305	0.38133	0.325974
YGR192C	TDH3	6	0.167595	0.104059	0.11577	0.219178	0.0596113	0.0936642	0.0320259	0.126441	0.139635	0.264679	0.119689	0.158194	0.205252	0.231013	0.0433496	0.205217	0.156679	0.270032	0.354537
YOL109W	ZEO1	7	0.251909	0.213177	0.413412	0.402043	0.137406	0.0524151	0.204498	0.0893435	0.105883	0.109715	0.0663958	0.0480326	0.314833	0.356054	0.261069	0.313785	0.191114	0.430173	0.424582
YLR110C	CCW12	8	0.202694	0.147008	0.141038	0.143721	0.0162629	0.112261	0.162528	0.066733	0.19305	0.246745	0.0452707	0.0987097	0.382484	0.260125	0.0658379	0.12057	0.121227	0.214378	0.359515
YDL184C	RPL41A	9	0.18219	0.185253	0.106996	0.108859	0.0513024	0.0454656	0.109705	0.133165	0.11322	0.112868	0.131364	0.156685	0.159567	0.528285	0.50241	0.731842	0.716849	0.640753	0.874763
YDL133C-A	RPL41B	10	0.196157	0.226342	0.155591	0.163516	0.047059	0.102737	0.215372	0.31361	0.0942577	0.0624691	0.0959261	0.130282	0.201358	0.711094	0.595989	0.779032	0.585289	0.630504	0.931344
YDR524C-B	YDR524C-B	11	0.18776	0.0258446	0.0787863	0.0539486	0.0549952	0.0858401	0.141537	0.0784985	0.149737	0.141839	0.0356464	0.0772688	0.267582	0.169884	0.0558647	0.0549157	0.0147209	0.23585	0.243235
YGL008C	PMA1	12	0.0903169	0.0730357	0.0614098	0.177893	0.0355011	0.0580595	0.0199315	0.282982	0.0836209	0.203492	0.180712	0.238225	0.308347	0.163143	0.156398	0.2393	0.111077	0.2191	0.374843
YPL240C	HSP82	13	0.3242	0.238713	0.348628	0.575094	0.0349945	0.0689298	0.0956676	0.192338	0.0848329	0.201461	0.321786	0.444489	0.090291	0.0333523	0.113971	0.393187	0.223733	0.239027	0.298764
YMR186W	HSC82	14	0.217724	0.140451	0.244388	0.361805	0.0437657	0.0522079	0.0763193	0.0378336	0.0563263	0.219853	0.196171	0.237245	0.167005	0.160058	0.134319	0.382071	0.303752	0.302275	0.437181
YBR244W	GPX2	15	0.17129	0.129873	0.186264	0.290345	0.0546997	0.0592242	0.0838165	0.0435242	0.03062	0.0682699	0.115037	0.0996185	0.0998505	0.183167	0.212096	0.188577	0.269741	0.349979	0.212042
YNL134C	YNL134C	16	0.142177	0.0592294	0.111826	0.206149	0.0279757	0.0596098	0.0422409	0.129286	0.155353	0.145576	0.0695054	0.0610343	0.175984	0.233483	0.131523	0.163467	0.0408199	0.259179	0.294017
YHR174W	ENO2	17	0.212916	0.225393	0.0746577	0.258954	0.0569954	0.14785	0.0157651	0.0869734	0.159533	0.168535	0.194442	0.144158	0.222175	0.254514	0.125357	0.311155	0.154778	0.403514	0.499575
YCR012W	PGK1	18	0.1953	0.179927	0.0821391	0.222049	0.116638	0.148004	0.0963707	0.175747	0.149691	0.0699997	0.15232	0.163871	0.318713	0.292998	0.143199	0.377461	0.202247	0.40192	0.479886
YGR142W	BTN2	19	0.437511	0.311342	0.541634	0.732809	0.101203	0.0443444	0.162855	0.484089	0.0806263	0.231977	0.331431	0.507448	0.155395	0.0544209	0.0322317	0.420096	0.518539	0.315229	0.202354
YML028W	TSA1	20	0.114779	0.0777998	0.125264	0.254713	0.0235639	0.139057	0.0360563	0.0667333	0.167735	0.106193	0.0808478	0.0709313	0.158585	0.206587	0.00952381	0.104494	0.0191782	0.224689	0.253946
YOR298C-A	MBF1	21	0.249258	0.207464	0.242343	0.414662	0.062627	0.0439481	0.0523707	0.0820733	0.121469	0.12709	0.170384	0.0750338	0.313526	0.322642	0.136007	0.458615	0.378554	0.438774	0.364176
YLR075W	RPL10	22	0.173119	0.0867579	0.0985256	0.194436	0.0695987	0.0654058	0.0522034	0.0949739	0.176829	0.0706812	0.119001	0.0432727	0.25666	0.362249	0.320738	0.317941	0.337511	0.457523	0.534852
YLL024C	SSA2	23	0.264435	0.193809	0.270246	0.491455	0.0467761	0.122627	0.0696105	0.153991	0.106128	0.154286	0.185878	0.214028	0.157371	0.125533	0.0229297	0.21072	0.206935	0.260092	0.401558
YKL152C	GPM1	24	0.192367	0.0934204	0.0878861	0.19384	0.0616415	0.14262	0.0224874	0.171556	0.141855	0.148354	0.126044	0.0648209	0.269952	0.383881	0.196511	0.399868	0.224248	0.478175	0.588686
YML131W	YML131W	25	0.112069	0.0442089	0.0654129	0.32606	0.119614	0.105875	0.0111651	0.148604	0.125364	0.149411	0.103111	0.143954	0.103872	0.19139	0.140991	0.382589	0.280152	0.383115	0.371103
YCR024C-A	PMP1	26	0.175071	0.139654	0.135359	0.108422	0.114023	0.0985938	0.0837142	0.224678	0.0824303	0.156204	0.149339	0.320713	0.398944	0.287841	0.378395	0.335489	0.325762	0.303894	0.366896
YOR153W	PDR5	27	0.0637675	0.0745417	0.0198434	0.359646	0.0488769	0.119289	0.0629567	0.010813	0.0959982	0.0874529	0.217659	0.212683	0.0224285	0.161303	0.0833741	0.333148	0.348807	0.288453	0.379048
YPL187W	MF(ALPHA)1	28	0.274693	0.22503	0.10472	0.0882149	0.0765715	0.0468676	0.157206	0.189401	0.122032	0.248081	0.0938164	0.10268	0.42667	0.308831	0.374191	0.314212	0.3154	0.327713	0.466418
YLR460C	YLR460C	29	0.17507	0.175761	0.181374	0.357731	0.0746392	0.116259	0.139707	0.135101	0.0798651	0.111484	0.107719	0.119496	0.240452	0.271663	0.379524	0.252274	0.289982	0.252662	0.292931
YDR353W	TRR1	30	0.162706	0.107178	0.227402	0.31124	0.0709741	0.085056	0.170894	0.0312081	0.09432	0.0136287	0.0885765	0.0413626	0.0110352	0.0545414	0.0270448	0.015884	0.00275573	0.213965	0.143682
YGR055W	MUP1	31	0.114365	0.23356	0.273944	0.562396	0.032058	0.107503	0.0887648	0.00295545	0.0973362	0.0635934	0.0716274	0.260471	0.0230505	0.0123134	0.208161	0.0984635	0.114188	0.278108	0.141702
YJR104C	SOD1	32	0.187729	0.0933383	0.128837	0.112583	0.0998839	0.102551	0.108562	0.0986576	0.202359	0.0164553	0.0123841	0.073228	0.241266	0.0474131	0.0979129	0.0162728	0.00644926	0.173213	0.162035
YDR011W	SNQ2	33	0.151226	0.071341	0.105795	0.354045	0.0498956	0.104077	0.133953	0.00918336	0.0515245	0.039043	0.180984	0.204467	0.0154774	0.00984591	0.0981527	0.135789	0.128835	0.0910656	0.184522
YNL031C	HHT2	34	0.200418	0.102083	0.200326	0.229304	0.0254958	0.079849	0.113466	0.240145	0.16923	0.195518	0.133567	0.0187065	0.376016	0.161294	0.18356	0.118287	0.00498252	0.206311	0.337263
YGR155W	CYS4	35	0.191518	0.120063	0.265678	0.361758	0.0146866	0.0705921	0.138291	0.0155474	0.0557088	0.0825031	0.174204	0.0942291	0.0509562	0.142806	0.0245985	0.165171	0.101933	0.289982	0.258793
YKL060C	FBA1	36	0.224229	0.0989217	0.151351	0.115875	0.0674595	0.116141	0.0420064	0.174902	0.198112	0.131698	0.127658	0.0634784	0.313479	0.38331	0.123764	0.231824	0.138248	0.405521	0.482245
YEL017C-A	PMP2	37	0.13939	0.0797047	0.055228	0.107046	0.0856645	0.0728866	0.14603	0.22483	0.195774	0.20364	0.128786	0.145228	0.0213648	0.302802	0.289229	0.521894	0.347609	0.468333	0.477877
YAL005C	SSA1	38	0.357026	0.218671	0.390158	0.716733	0.0320714	0.125588	0.118947	0.1507	0.0622981	0.268708	0.394689	0.433806	0.0259093	0.0749283	0.19831	0.156592	0.0400332	0.154782	0.186087
YPL061W	ALD6	39	0.170535	0.150066	0.189324	0.363029	0.0649654	0.173959	0.00864285	0.062621	0.172365	0.327529	0.12813	0.272658	0.226099	0.0956918	0.0565078	0.0363548	0.0275765	0.135024	0.197232
YJR045C	SSC1	40	0.252269	0.127237	0.282985	0.395273	0.0306914	0.0911447	0.12806	0.060998	0.108173	0.205406	0.189549	0.136587	0.103874	0.0766442	0.0126738	0.173008	0.0946301	0.179131	0.229255
YAL038W	CDC19	41	0.16804	0.104871	0.0662762	0.104929	0.0382074	0.134094	0.0319181	0.215312	0.181021	0.194862	0.130051	0.0966632	0.16292	0.275026	0.119275	0.198476	0.0611453	0.345198	0.460842
YLL026W	HSP104	42	0.340251	0.196027	0.368687	0.6062	0.0578572	0.130543	0.0602937	0.20115	0.164172	0.234423	0.196331	0.411255	0.108445	0.0807565	0.298148	0.257184	0.0482218	0.0160847	0.0196587
YNL030W	HHF2	43	0.247603	0.182486	0.21222	0.26565	0.101643	0.0761264	0.0347732	0.266685	0.126804	0.120989	0.0452317	0.0681439	0.478566	0.25777	0.179967	0.096452	0.117002	0.307892	0.264094
YBR008C	FLR1	44	0.115538	0.15791	0.113621	0.366245	0.0346541	0.093874	0.0507722	0.120783	0.137195	0.223595	0.075011	0.258384	0.0347149	0.236734	0.175081	0.24631	0.272625	0.334162	0.275995
YLR249W	YEF3	45	0.123322	0.0647185	0.119209	0.13835	0.0404332	0.0722317	0.108138	0.122185	0.0921886	0.189012	0.166226	0.163667	0.076103	0.317118	0.325764	0.347054	0.281362	0.359033	0.56909
YDR050C	TPI1	46	0.178491	0.0968814	0.20074	0.105216	0.151631	0.136329	0.145422	0.228657	0.194018	0.068929	0.0776645	0.0707456	0.419036	0.343035	0.275179	0.401751	0.294792	0.514348	0.555868
YOR369C	RPS12	47	0.204365	0.132483	0.161285	0.181457	0.0822402	0.0587579	0.0877354	0.115165	0.0479642	0.0701275	0.0839815	0.0897356	0.34994	0.491593	0.424861	0.714164	0.643401	0.672061	0.873402
YGR234W	YHB1	48	0.177957	0.113045	0.144439	0.253485	0.0530078	0.0941504	0.103858	0.280526	0.153324	0.181726	0.148036	0.293673	0.242911	0.457266	0.363855	0.549689	0.324229	0.547791	0.561901
YER091C	MET6	49	0.211764	0.259066	0.476946	0.557846	0.00676593	0.0856635	0.162463	0.209557	0.114297	0.128765	0.131801	0.182178	0.0793928	0.13367	0.203157	0.181395	0.0223104	0.347168	0.237085
YJL034W	KAR2	50	0.24528	0.190194	0.170426	0.460158	0.0147492	0.110491	0.114423	0.0754084	0.128634	0.206555	0.188172	0.346382	0.0919754	0.0874279	0.014358	0.332573	0.21651	0.271668	0.30129
YLR355C	ILV5	51	0.150598	0.0729989	0.058794	0.0770191	0.100104	0.132412	0.0660395	0.109263	0.141143	0.0883588	0.0453843	0.110681	0.164466	0.389414	0.334363	0.272034	0.168818	0.317127	0.346702
YCL026C-A	FRM2	52	0.252752	0.218714	0.284919	0.583297	0.0744746	0.180275	0.169149	0.037607	0.177408	0.0371249	0.0861177	0.07956	0.057466	0.245656	0.261995	0.520434	0.401999	0.576855	0.43168
YIL053W	GPP1	53	0.153835	0.186844	0.0153602	0.162507	0.0396778	0.0693114	0.0989067	0.1962	0.040703	0.0099526	0.0843555	0.0973245	0.0797822	0.352068	0.304435	0.288413	0.269813	0.579564	0.562954
YDR224C	HTB1	54	0.208988	0.197082	0.281222	0.351602	0.108699	0.0660851	0.0132806	0.237883	0.266097	0.305593	0.127937	0.113464	0.348202	0.153977	0.121548	0.126968	0.150395	0.153426	0.267096
YDR225W	HTA1	55	0.200244	0.171929	0.156101	0.19256	0.0798375	0.122823	0.158333	0.353258	0.130432	0.121474	0.0770854	0.128324	0.41701	0.165877	0.299871	0.103729	0.113445	0.37245	0.423844
YLR044C	PDC1	56	0.149366	0.106299	0.157009	0.0829115	0.0715894	0.129926	0.0974158	0.217707	0.132699	0.186184	0.139147	0.0963578	0.21125	0.186605	0.0190162	0.147484	0.00607405	0.208983	0.428982
YLR325C	RPL38	57	0.154598	0.171017	0.181267	0.221065	0.00314305	0.0423062	0.109228	0.0116334	0.340024	0.0409546	0.104407	0.0510412	0.157201	0.363914	0.526422	0.553539	0.314365	0.548147	0.642598
YLR108C	YLR108C	58	0.128876	0.0304369	0.0618481	0.126357	0.0306996	0.135439	0.111325	0.0837231	0.0635793	0.145087	0.107495	0.0566002	0.183911	0.217783	0.20773	0.277241	0.169867	0.267172	0.275699
YJR123W	RPS5	59	0.163631	0.132841	0.193271	0.211633	0.0284872	0.0876392	0.155592	0.0287637	0.0938915	0.21098	0.0511794	0.0691615	0.0891074	0.362641	0.125116	0.25927	0.232699	0.335452	0.737227
YNL178W	RPS3	60	0.184758	0.147906	0.102046	0.187026	0.0490932	0.106726	0.0818393	0.124742	0.0985658	0.190153	0.0723725	0.0995181	0.191403	0.39626	0.394579	0.486243	0.37391	0.525192	0.707944
YLR167W	RPS31	61	0.192261	0.187904	0.159903	0.214966	0.0688475	0.0371574	0.124848	0.101873	0.139363	0.18519	0.0720453	0.0498784	0.21061	0.436401	0.331366	0.396023	0.460365	0.494336	0.783593
YNL007C	SIS1	62	0.209884	0.192189	0.218913	0.41083	0.0572972	0.0748261	0.0184479	0.141393	0.170732	0.135653	0.0949313	0.163314	0.227153	0.102826	0.0482983	0.269003	0.244363	0.280522	0.168686
YBR009C	HHF1	63	0.247577	0.133271	0.183692	0.318385	0.0699646	0.0742052	0.0365675	0.245189	0.267306	0.2193	0.0844663	0.0574171	0.386651	0.168832	0.205112	0.0754516	0.109664	0.338131	0.347538
YHL015W	RPS20	64	0.199924	0.118378	0.348862	0.281867	0.0682449	0.0790086	0.267863	0.139555	0.174081	0.212816	0.165834	0.0719049	0.0621447	0.452272	0.349766	0.455509	0.321673	0.484841	0.704122
YBR101C	FES1	65	0.213462	0.171536	0.322731	0.4563	0.0548424	0.0507387	0.115206	0.219672	0.0909458	0.105118	0.0607326	0.0760186	0.0939584	0.133155	0.133519	0.374217	0.344445	0.321176	0.355088
YNL064C	YDJ1	66	0.234	0.147692	0.259662	0.366873	0.0308436	0.0498396	0.131409	0.168026	0.0935212	0.124706	0.14956	0.137779	0.173966	0.180977	0.162892	0.337125	0.428633	0.345571	0.410039
YOR020C	HSP10	67	0.224401	0.171516	0.225474	0.416636	0.0473783	0.0469965	0.0422646	0.12343	0.135477	0.0379633	0.0545764	0.172406	0.188133	0.383052	0.389453	0.461445	0.478019	0.513449	0.587258
YDL081C	RPP1A	68	0.207693	0.260096	0.185735	0.206779	0.00983541	0.070438	0.119344	0.0775079	0.180857	0.207257	0.0776923	0.214039	0.0369166	0.374448	0.17524	0.530223	0.354643	0.424667	0.735013
YBL002W	HTB2	69	0.173277	0.17773	0.19976	0.303097	0.0812094	0.104881	0.018698	0.217418	0.244878	0.318802	0.169371	0.0712127	0.380748	0.246826	0.192521	0.342629	0.14741	0.293768	0.428457
YEL009C	GCN4	70	0.164644	0.115315	0.113121	0.220867	0.0224185	0.0679459	0.0678182	0.335769	0.0395032	0.230764	0.13639	0.0698859	0.222613	0.260924	0.268669	0.325078	0.205085	0.297746	0.423417
YOR027W	STI1	71	0.268393	0.0962307	0.327236	0.416665	0.0773873	0.0564831	0.147184	0.234388	0.0301752	0.140041	0.138335	0.227472	0.116817	0.0239128	0.0504396	0.222669	0.177241	0.153143	0.203667
YHR055C	CUP1-2	72	0.4051	0.205252	0.451776	0.486906	0.119813	0.14201	0.0554367	0.286089	0.0664488	0.00341871	0.288386	0.247153	0.560104	0.410564	0.289625	0.366536	0.0929999	0.292894	0.00610844
YDL124W	YDL124W	73	0.145286	0.148766	0.180328	0.298887	0.0701711	0.0736844	0.0376268	0.105601	0.202492	0.128773	0.0631689	0.0885487	0.0899786	0.0670081	0.13171	0.0686058	0.00969012	0.145692	0.0638238
YDL055C	PSA1	74	0.106208	0.0543194	0.136007	0.148069	0.0153762	0.0328931	0.00237485	0.241165	0.116339	0.193843	0.0867569	0.0954471	0.424604	0.313883	0.212054	0.280614	0.14999	0.401639	0.430637
YEL034W	HYP2	75	0.254976	0.146764	0.17751	0.243263	0.0312467	0.168384	0.0339348	0.124152	0.170043	0.245346	0.131794	0.0864732	0.123706	0.347509	0.288377	0.162647	0.16023	0.367845	0.492587
YBR010W	HHT1	76	0.122829	0.122052	0.230897	0.249356	0.0514812	0.133109	0.0857033	0.172787	0.167502	0.212803	0.100135	0.116987	0.323133	0.289466	0.326087	0.192323	0.159649	0.374853	0.531759
YPL106C	SSE1	77	0.255305	0.202453	0.294562	0.476563	0.0343459	0.109062	0.180052	0.172698	0.0819238	0.215573	0.18563	0.19755	0.0795687	0.142458	0.0695831	0.286544	0.155713	0.256087	0.398122
YEL071W	DLD3	78	0.26419	0.194018	0.120122	0.0997242	0.0537168	0.0465813	0.138066	0.0224698	0.115912	0.0962141	0.0619948	0.0982506	0.232449	0.308079	0.0895387	0.311359	0.0564097	0.425549	0.213207
YAL003W	EFB1	79	0.266425	0.101706	0.226104	0.338572	0.0277183	0.0677401	0.0892265	0.0209293	0.0573646	0.174142	0.126197	0.0345473	0.164196	0.320936	0.341043	0.377064	0.36684	0.396606	0.582602
YMR058W	FET3	80	0.204411	0.214902	0.180167	0.277893	0.0172505	0.118255	0.0877388	0.336017	0.149349	0.29985	0.30996	0.18749	0.319849	0.119382	0.000145262	0.109176	0.0421039	0.254284	0.351907
YDR382W	RPP2B	81	0.222079	0.144009	0.111768	0.187491	0.0195097	0.140644	0.0823809	0.0388631	0.153338	0.0802246	0.0549765	0.0675509	0.191957	0.494165	0.321612	0.481214	0.420089	0.606869	0.65774
YCR005C	CIT2	82	0.246414	0.188951	0.156348	0.241864	0.0573395	0.0842406	0.103459	0.0777046	0.064837	0.114167	0.162131	0.113198	0.0919111	0.478718	0.0695858	0.332943	0.0186112	0.470808	0.136371
YEL046C	GLY1	83	0.118335	0.147955	0.0419208	0.135079	0.0632939	0.0799353	0.0411465	0.0374454	0.178365	0.0635747	0.162963	0.136939	0.117333	0.111017	0.0171297	0.0039372	0.0595326	0.212291	0.163282
YLR441C	RPS1A	84	0.126079	0.0873117	0.172759	0.182939	0.0397495	0.0782785	0.183782	0.120595	0.128251	0.125924	0.18075	0.061377	0.172707	0.309559	0.321323	0.359334	0.341412	0.432022	0.656864
YOL086C	ADH1	85	0.212746	0.128322	0.167528	0.114084	0.0646366	0.14227	0.0677119	0.0572973	0.161011	0.0150651	0.118543	0.168026	0.476077	0.286668	0.166101	0.26274	0.132558	0.421818	0.461019
YMR318C	ADH6	86	0.156745	0.144626	0.0607491	0.273435	0.0554142	0.105568	0.0058191	0.031737	0.139482	0.0513501	0.0254392	0.0552898	0.0608601	0.197409	0.132846	0.228304	0.237693	0.393411	0.30819
YPR149W	NCE102	87	0.0456836	0.177074	0.105128	0.321415	0.150925	0.197454	0.106298	0.175109	0.142833	0.326908	0.284979	0.114375	0.338716	0.0573339	0.093436	0.0779619	0.279104	0.00637939	0.0387933
YKL096W-A	CWP2	88	0.373655	0.305683	0.375672	0.396271	0.0865199	0.106577	0.190931	0.170146	0.320254	0.416723	0.287341	0.203619	0.686946	0.0874383	0.133643	0.103817	0.124144	0.0554103	0.15984
YKL056C	TMA19	89	0.19506	0.159377	0.0858723	0.17331	0.0671864	0.0819535	0.187142	0.0354913	0.163395	0.20455	0.193893	0.0537209	0.223639	0.489931	0.564653	0.54447	0.555222	0.60814	0.789938
YCR024C-B	YCR024C-B	90	0.0923951	0.0747281	0.186501	0.380584	0.104861	0.0291201	0.142252	0.39859	0.0613918	0.262075	0.0969901	0.389081	0.485485	0.208569	0.339004	0.336214	0.415741	0.41686	0.479683
YGL253W	HXK2	91	0.135461	0.105211	0.102198	0.253586	0.0986565	0.0882312	0.0448639	0.140451	0.0753395	0.239564	0.14886	0.0973669	0.182706	0.29657	0.29668	0.391244	0.379787	0.424648	0.497343
YLR259C	HSP60	92	0.198209	0.179777	0.141023	0.323903	0.0522416	0.11114	0.00361538	0.141131	0.174368	0.0690553	0.0716805	0.223666	0.159813	0.0871259	0.0772045	0.28287	0.191866	0.226557	0.283016
YPL131W	RPL5	93	0.142325	0.07745	0.1567	0.189484	0.0574086	0.0523902	0.141226	0.144695	0.115174	0.158266	0.0928833	0.0725957	0.114548	0.25371	0.0634834	0.18979	0.120308	0.235379	0.403392
YBL003C	HTA2	94	0.169973	0.105562	0.232244	0.236609	0.0852029	0.0987174	0.0401721	0.235524	0.122184	0.145364	0.171958	0.110718	0.559139	0.228356	0.171629	0.258238	0.165312	0.271894	0.369091
YOR063W	RPL3	95	0.213159	0.121646	0.114492	0.181879	0.0402869	0.0965564	0.137261	0.0467039	0.134093	0.123269	0.0619842	0.026658	0.138186	0.295703	0.22513	0.27243	0.186684	0.3484	0.511314
YDL020C	RPN4	96	0.125239	0.0953696	0.115664	0.334365	0.0703791	0.136241	0.0832367	0.169169	0.0331193	0.0524604	0.124756	0.119498	0.0245099	0.048864	0.0497834	0.196228	0.18224	0.182849	0.206103
YNL231C	PDR16	97	0.0845238	0.160084	0.0671918	0.161726	0.109829	0.0591626	0.0832817	0.21982	0.0329552	0.0372429	0.0336924	0.105089	0.183829	0.190483	0.170397	0.233191	0.219355	0.269684	0.265212
YHR162W	MPC2	98	0.200548	0.062873	0.131498	0.179305	0.0419457	0.0937401	0.0541806	0.0882085	0.147096	0.0951752	0.0860206	0.0476298	0.128485	0.18972	0.128435	0.236432	0.0609985	0.369769	0.295957
YCL026C-B	HBN1	99	0.289253	0.239343	0.37487	0.735752	0.0897358	0.199729	0.250321	0.161809	0.16191	0.10055	0.0290737	0.108887	0.0689945	0.068409	0.240174	0.0244	0.0619734	0.352546	0.225964
YOL039W	RPP2A	100	0.232488	0.0808813	0.258215	0.216871	0.0887237	0.0485446	0.0885694	0.279957	0.0890471	0.16364	0.147269	0.0384521	0.137337	0.393557	0.298381	0.418545	0.339992	0.486706	0.766006
YKL081W	TEF4	101	0.194115	0.131724	0.152087	0.228865	0.0385296	0.0661662	0.0621908	0.145614	0.0958815	0.136364	0.100271	0.125272	0.183532	0.329513	0.386649	0.266384	0.360353	0.39348	0.486778
YDL061C	RPS29B	102	0.212037	0.102682	0.151803	0.194103	0.106374	0.0524886	0.0751621	0.0967035	0.214084	0.0652147	0.0523905	0.121101	0.141495	0.25181	0.359727	0.318365	0.318785	0.443932	0.630741
YJL101C	GSH1	103	0.143138	0.0783599	0.0959022	0.246441	0.0102316	0.0697504	0.0679678	0.0752206	0.100744	0.0588054	0.105327	0.0928267	0.130479	0.20784	0.0722319	0.231467	0.128772	0.227449	0.31336
YJL190C	RPS22A	104	0.175696	0.124147	0.241094	0.266671	0.0559471	0.106558	0.218587	0.0771332	0.143599	0.291531	0.109098	0.0381647	0.238075	0.414179	0.460677	0.476685	0.401312	0.572314	0.83664
YLR216C	CPR6	105	0.31631	0.147982	0.381651	0.54034	0.0208712	0.055139	0.199344	0.226925	0.122674	0.202037	0.217024	0.230809	0.102155	0.100076	0.0271094	0.281709	0.22614	0.273722	0.254416
YLR029C	RPL15A	106	0.233055	0.211665	0.129989	0.156795	0.0296326	0.0798971	0.0662458	0.163235	0.0600838	0.00858133	0.092191	0.0840143	0.258127	0.470243	0.363822	0.375154	0.408143	0.476752	0.642041
YKR071C	DRE2	107	0.14586	0.0641284	0.158356	0.259755	0.0794108	0.0350807	0.210318	0.0963406	0.123651	0.079332	0.165295	0.0983765	0.115322	0.346113	0.409708	0.41286	0.493389	0.379285	0.486946
YOR302W	YOR302W	108	0.0697643	0.229994	0.0536597	0.057027	0.312595	0.236835	0.274325	0.0304334	0.446305	0.191975	0.251705	0.128781	0.436894	0.135616	0.139214	0.0651867	0.0646361	0.418687	0.310923
YDR502C	SAM2	109	0.136055	0.210006	0.226641	0.521667	0.0458855	0.103007	0.082588	0.254532	0.127313	0.151641	0.0562703	0.167506	0.236799	0.247645	0.0478293	0.313516	0.206226	0.431863	0.458169
YDR033W	MRH1	110	0.167912	0.222797	0.180496	0.30878	0.0531926	0.0358404	0.105919	0.290438	0.0473366	0.26612	0.30541	0.303603	0.234141	0.171464	0.214349	0.216604	0.0690558	0.203201	0.260276
YPR065W	ROX1	111	0.0442695	0.0786379	0.126338	0.178841	0.229449	0.213054	0.198684	0.0342113	0.128101	0.185027	0.0824588	0.162248	0.0811169	0.067359	0.00419385	0.0085302	0.0302877	0.131716	0.0331226
YLR340W	RPP0	112	0.176576	0.0920211	0.127146	0.180938	0.0196301	0.0630103	0.082857	0.0401666	0.105693	0.205504	0.0969275	0.0769979	0.095832	0.237913	0.060286	0.176766	0.1295	0.321468	0.525116
YLR264W	RPS28B	113	0.0439921	0.0482416	0.0945336	0.26334	0.0556072	0.216924	0.100035	0.222223	0.176512	0.166052	0.198678	0.0989292	0.214185	0.385662	0.423073	0.650782	0.555378	0.432391	0.782879
YER131W	RPS26B	114	0.183916	0.122754	0.272643	0.311959	0.0809862	0.061286	0.185439	0.324499	0.16357	0.23995	0.0841306	0.118963	0.154594	0.410701	0.263544	0.355894	0.29771	0.466532	0.720499
YBL092W	RPL32	115	0.164992	0.132659	0.185886	0.179585	0.0274713	0.0824576	0.122968	0.100942	0.0518328	0.0645157	0.033069	0.105432	0.166495	0.359467	0.287283	0.402726	0.332486	0.454831	0.701764
YJR009C	TDH2	116	0.11751	0.0721498	0.179578	0.22368	0.147218	0.12895	0.133007	0.288609	0.138443	0.0685968	0.137639	0.0665101	0.25434	0.433545	0.236753	0.483181	0.298699	0.59292	0.504087
YDR135C	YCF1	117	0.0995399	0.0513679	0.0876906	0.180644	0.0427803	0.0579219	0.0117367	0.142694	0.103191	0.120396	0.137103	0.185352	0.0682056	0.232777	0.218549	0.372455	0.308616	0.291085	0.424734
YPL250C	ICY2	118	0.0827191	0.0781197	0.138392	0.243021	0.126601	0.0945299	0.0619005	0.0631078	0.034832	0.160183	0.0387338	0.0559403	0.145342	0.071388	0.267835	0.0458321	0.175287	0.081382	0.206357
YML063W	RPS1B	119	0.155836	0.160552	0.181361	0.193835	0.0154128	0.0868356	0.166148	0.177701	0.13167	0.258685	0.100139	0.114396	0.223291	0.487832	0.350875	0.481478	0.406715	0.482352	0.768457
YCR102C	YCR102C	120	0.152867	0.146584	0.119403	0.346255	0.0311435	0.0720299	0.144028	0.0895009	0.116808	0.0626159	0.179664	0.229355	0.18337	0.18446	0.268517	0.124085	0.268338	0.320018	0.303621
YGL255W	ZRT1	121	0.507345	0.538608	0.458442	0.409611	0.134374	0.129319	0.638745	0.887799	0.277365	0.218946	0.156203	0.126639	0.631687	0.559563	0.929914	0.480685	0.60601	0.607611	0.893111
YAL012W	CYS3	122	0.238018	0.256915	0.466113	0.564568	0.0497812	0.120959	0.206302	0.26929	0.1432	0.0471604	0.110372	0.085483	0.045184	0.0103722	0.318988	0.151222	0.164609	0.179175	0.0367744
YBR196C	PGI1	123	0.139658	0.0387597	0.0756851	0.169621	0.0328925	0.0916113	0.0132369	0.148339	0.156698	0.185579	0.140949	0.192729	0.19937	0.273414	0.191095	0.240728	0.101305	0.33582	0.429711
YGR027C	RPS25A	124	0.168519	0.101361	0.218914	0.1256	0.091962	0.0558775	0.0767447	0.188517	0.0983059	0.0558195	0.0660761	0.0799709	0.184904	0.466025	0.485425	0.395114	0.513398	0.569941	0.843278
YER043C	SAH1	125	0.0989163	0.0662414	0.0833321	0.182346	0.0793126	0.115872	0.10856	0.367555	0.129958	0.227848	0.15159	0.122379	0.198866	0.344412	0.366756	0.420773	0.367843	0.436844	0.587866
YMR251W-A	HOR7	126	0.144709	0.311328	0.222546	0.0897517	0.208488	0.154148	0.269312	0.283053	0.197502	0.364196	0.0763848	0.109049	0.17496	0.257126	0.43914	0.288166	0.461026	0.237931	0.380686
YML116W	ATR1	127	0.110536	0.0583362	0.144617	0.169231	0.0471025	0.123201	0.0730095	0.223983	0.0390256	0.0686489	0.0944701	0.183749	0.0972931	0.277631	0.278339	0.345078	0.361182	0.24215	0.272675
YJL159W	HSP150	128	0.140998	0.0918226	0.0721306	0.181126	0.0504152	0.0929348	0.0204744	0.0743826	0.164003	0.228523	0.141407	0.173349	0.17563	0.168726	0.039224	0.0329668	0.0185242	0.174801	0.191837
YGL123W	RPS2	129	0.139096	0.0806734	0.155438	0.206709	0.0148142	0.137977	0.164304	0.0252631	0.0801185	0.113302	0.103406	0.132465	0.0556129	0.349643	0.247477	0.353953	0.220675	0.358461	0.567876
YBR078W	ECM33	130	0.124739	0.0550409	0.0770263	0.134384	0.0514489	0.111017	0.106263	0.231942	0.101929	0.2898	0.150665	0.184701	0.358185	0.206252	0.179425	0.174892	0.120723	0.285912	0.358274
YEL054C	RPL12A	131	0.190314	0.0870202	0.19862	0.285876	0.0464488	0.0898775	0.223708	0.131205	0.218804	0.231188	0.139379	0.119575	0.0630654	0.461479	0.462775	0.504258	0.345436	0.527168	0.764003
YGL189C	RPS26A	132	0.165503	0.184637	0.212274	0.26811	0.0304631	0.0797483	0.125428	0.0540593	0.256062	0.226891	0.0490253	0.0240619	0.0593537	0.322327	0.101473	0.278739	0.104624	0.323237	0.6744
YER177W	BMH1	133	0.188147	0.140979	0.155276	0.259549	0.0781448	0.0712243	0.020459	0.256183	0.188068	0.193734	0.132956	0.166412	0.312519	0.2426	0.1942	0.198495	0.0221626	0.309557	0.379739
YBR068C	BAP2	134	0.114841	0.0708573	0.15417	0.061544	0.0614467	0.0156811	0.0400001	0.145834	0.0941736	0.0469862	0.0247197	0.136169	0.126876	0.168813	0.148203	0.186573	0.196798	0.176453	0.171109
YHR143W	DSE2	135	0.0910026	0.0563937	0.0795765	0.134405	0.0802807	0.047581	0.123842	0.295767	0.115243	0.162305	0.121316	0.365936	0.221938	0.270814	0.144647	0.155564	0.0942335	0.196998	0.138215
YHR071W	PCL5	136	0.0399575	0.203467	0.0490932	0.293626	0.0974449	0.183658	0.0533643	0.0787123	0.0472231	0.141305	0.106734	0.0660755	0.0784172	0.00829471	0.00650688	0.0427736	0.0742039	0.0786601	0.0473664
YHR018C	ARG4	137	0.119361	0.0959322	0.255894	0.167849	0.041117	0.157594	0.037057	0.15919	0.101793	0.0568382	0.0783425	0.124361	0.069263	0.236284	0.332528	0.290535	0.323213	0.380112	0.341367
YOR052C	TMC1	138	0.223256	0.134038	0.234395	0.301565	0.0597822	0.032144	0.123437	0.122379	0.14149	0.149658	0.132438	0.17594	0.261877	0.269377	0.242831	0.410403	0.0870655	0.351377	0.424406
YGR157W	CHO2	139	0.122136	0.093328	0.0731978	0.211311	0.105998	0.0954628	0.113054	0.190485	0.0573806	0.156538	0.139604	0.235615	0.257525	0.125106	0.0154419	0.318561	0.265057	0.257556	0.307905
YGR148C	RPL24B	140	0.218419	0.158561	0.281061	0.251694	0.0887732	0.0663308	0.0555011	0.144893	0.0557532	0.0838421	0.121693	0.0900331	0.207599	0.34222	0.216266	0.344662	0.362794	0.382393	0.667972
YOR167C	RPS28A	141	0.180392	0.104482	0.0895254	0.211111	0.16869	0.137565	0.00759033	0.126668	0.08803	0.122932	0.0892904	0.0620441	0.36838	0.500168	0.341572	0.548781	0.731217	0.619036	0.834975
YML130C	ERO1	142	0.237764	0.178165	0.190509	0.44628	0.0466148	0.076835	0.130409	0.142362	0.0307932	0.206041	0.209278	0.263887	0.0291739	0.128047	0.188094	0.33378	0.269163	0.332141	0.337215
YDR258C	HSP78	143	0.272565	0.0856892	0.325836	0.40446	0.0501711	0.0493327	0.0562372	0.107302	0.0830768	0.247749	0.163742	0.266873	0.101994	0.103436	0.424397	0.269505	0.0249095	0.0203264	0.124764
YMR307W	GAS1	144	0.0798682	0.0927478	0.11092	0.191935	0.0101962	0.0834992	0.0307702	0.267692	0.111968	0.192543	0.124412	0.207488	0.182481	0.220459	0.234614	0.189713	0.0900677	0.308583	0.379664
YLR286C	CTS1	145	0.140291	0.0167916	0.128065	0.239995	0.0248374	0.11104	0.0345021	0.235066	0.10836	0.276446	0.208665	0.247227	0.385043	0.129414	0.108644	0.144277	0.00420669	0.109768	0.211693
YHL033C	RPL8A	146	0.186628	0.126418	0.250976	0.190539	0.0825437	0.0366803	0.239752	0.0992682	0.158858	0.208389	0.143427	0.0612776	0.176002	0.332838	0.329057	0.236776	0.0956907	0.389709	0.542499
YHR072W-A	NOP10	147	0.155827	0.143819	0.258345	0.290958	0.0897232	0.0647859	0.133807	0.125237	0.156414	0.0242924	0.0151909	0.0578478	0.245278	0.60558	0.630092	0.58163	0.665279	0.679843	0.843591
YDR418W	RPL12B	148	0.0906017	0.162487	0.158795	0.205182	0.0420368	0.0542644	0.133872	0.143806	0.168049	0.195119	0.10279	0.0487802	0.108449	0.421884	0.298897	0.400978	0.288969	0.368573	0.685568
YHR005C-A	TIM10	149	0.185301	0.17537	0.152102	0.175571	0.0629198	0.0412995	0.0710501	0.193012	0.20745	0.162453	0.00834695	0.0859088	0.265034	0.430832	0.470467	0.467554	0.639085	0.468705	0.76523
YFL039C	ACT1	150	0.188239	0.0628008	0.0717754	0.273217	0.0629584	0.121534	0.0367278	0.109445	0.198059	0.230359	0.147087	0.177898	0.045993	0.161587	0.0435987	0.218969	0.0847226	0.314171	0.397943
YDR513W	GRX2	151	0.0840596	0.148967	0.109988	0.232579	0.140515	0.0572471	0.095072	0.0740639	0.140572	0.0365557	0.161643	0.105879	0.180564	0.0930381	0.0699792	0.0822121	0.133146	0.0698159	0.014941
YDL192W	ARF1	152	0.0797877	0.120568	0.17389	0.34217	0.066231	0.12376	0.067337	0.118826	0.116764	0.0826604	0.0853013	0.0749327	0.263409	0.35557	0.401924	0.526543	0.451442	0.528546	0.71061
YER145C	FTR1	153	0.0518041	0.101698	0.159201	0.130787	0.0289866	0.206696	0.107477	0.294392	0.21476	0.168332	0.0961798	0.192033	0.404302	0.202579	0.185313	0.305436	0.310606	0.509563	0.488562
YGL089C	MF(ALPHA)2	154	0.348391	0.847673	0.364733	0.588956	0.0850737	0.179946	0.126957	0.00985672	0.075984	0.189491	0.619881	0.0369303	0.532683	0.296386	0.409801	0.271792	0.523978	0.459014	0.484825
YDR037W	KRS1	155	0.132768	0.061306	0.151575	0.156665	0.0717976	0.0837368	0.142836	0.0112387	0.0929125	0.0674796	0.14299	0.0988978	0.0493056	0.162148	0.10368	0.178778	0.0102263	0.23332	0.283842
YDR132C	YDR132C	156	0.161336	0.0807328	0.135427	0.249574	0.0631924	0.0352532	0.153336	0.0392612	0.0624863	0.0781495	0.103616	0.121453	0.0797395	0.182223	0.187347	0.276685	0.271067	0.220479	0.264668
YDL147W	RPN5	157	0.203693	0.0438837	0.196012	0.245575	0.0396973	0.0333926	0.0751621	0.270804	0.0640058	0.19289	0.0947183	0.140653	0.16774	0.259634	0.376795	0.378203	0.296064	0.33054	0.500132
YLR333C	RPS25B	158	0.190054	0.187685	0.261942	0.322867	0.0363515	0.219473	0.10138	0.0584933	0.183604	0.20591	0.136079	0.130515	0.336474	0.418108	0.37673	0.556301	0.47874	0.610691	0.898899
YOR198C	BFR1	159	0.220773	0.047774	0.296314	0.312384	0.0690946	0.0339568	0.151055	0.144967	0.133924	0.199686	0.171359	0.12573	0.122154	0.172736	0.121941	0.208044	0.111266	0.212805	0.356726
YPR145W	ASN1	160	0.111329	0.124879	0.327306	0.302122	0.074942	0.0606888	0.0952205	0.355563	0.126627	0.0217953	0.111572	0.10768	0.21936	0.0746468	0.238721	0.182247	0.23442	0.173476	0.0905825
YGR211W	ZPR1	161	0.24384	0.142856	0.337948	0.45461	0.103574	0.11023	0.290447	0.281333	0.130452	0.101512	0.161165	0.131081	0.0691361	0.132605	0.0351156	0.200883	0.142501	0.240872	0.308102
YER052C	HOM3	162	0.10978	0.0697628	0.139018	0.235655	0.0364022	0.0979655	0.134989	0.128904	0.0786258	0.144806	0.136499	0.139137	0.0747096	0.00093517	0.137627	0.0117497	0.168366	0.0150078	0.0346295
YLR197W	NOP56	163	0.197778	0.061008	0.236737	0.217317	0.0419107	0.0854456	0.200646	0.162924	0.187229	0.115487	0.172654	0.139939	0.125444	0.378332	0.503126	0.510691	0.440452	0.444763	0.679205
YPR080W	TEF1	164	0.178143	0.177526	0.0985157	0.162221	0.0447491	0.111247	0.0284544	0.202734	0.092306	0.118246	0.075391	0.0429633	0.335176	0.407021	0.413651	0.454107	0.435586	0.459639	0.606597
YKR042W	UTH1	165	0.105669	0.0201226	0.15621	0.146091	0.0759095	0.136766	0.164224	0.102849	0.155081	0.291778	0.0966626	0.214337	0.124417	0.125714	0.00808722	0.0604837	0.0183162	0.168685	0.109123
YML123C	PHO84	166	0.655906	0.71087	0.267267	0.29802	0.175096	0.337958	0.050031	0.26327	0.164137	0.188563	1.43662	0.0313332	0.505975	1.00575	0.946395	0.82518	0.691436	1.02672	1.0441
YER124C	DSE1	167	0.175507	0.0755279	0.193401	0.274029	0.0674067	0.0315327	0.0129437	0.29313	0.0680495	0.238703	0.10724	0.13912	0.344834	0.227936	0.164864	0.242243	0.0565349	0.164205	0.236388
YBR118W	TEF2	168	0.215457	0.179192	0.165387	0.222631	0.0813883	0.106025	0.0871109	0.133168	0.160978	0.14468	0.125786	0.080613	0.302056	0.277686	0.222553	0.389588	0.27944	0.283079	0.587791
YOL040C	RPS15	169	0.205485	0.135879	0.177806	0.264716	0.0488437	0.0260145	0.134844	0.0471907	0.165232	0.24191	0.122848	0.112944	0.129136	0.320724	0.250864	0.209859	0.325645	0.421071	0.700784
YLR293C	GSP1	170	0.158793	0.14727	0.183849	0.221714	0.0610499	0.0913338	0.185403	0.23265	0.144685	0.244979	0.101867	0.0204512	0.121669	0.306659	0.307464	0.2667	0.0935495	0.304924	0.547299
YEL027W	VMA3	171	0.0670805	0.0478923	0.0568987	0.193236	0.0824513	0.106698	0.170522	0.132012	0.13471	0.0807175	0.0557371	0.238588	0.0831754	0.342898	0.371482	0.523688	0.520394	0.471464	0.732996
YLR304C	ACO1	172	0.185958	0.0333522	0.187434	0.193702	0.0926565	0.22997	0.0438565	0.0346721	0.221987	0.0447601	0.175473	0.131489	0.338242	0.209925	0.0539722	0.392527	0.0303215	0.223954	0.237118
YGR282C	BGL2	173	0.130694	0.0566389	0.0960551	0.172633	0.0273181	0.102069	0.0173106	0.0390726	0.0950309	0.249652	0.073884	0.158956	0.0772773	0.271837	0.181796	0.188408	0.203633	0.392241	0.464726
YDL229W	SSB1	174	0.0949545	0.0916018	0.176912	0.202837	0.0304509	0.0305674	0.165708	0.0296435	0.157291	0.206121	0.121378	0.150966	0.0371335	0.340342	0.244941	0.321777	0.173353	0.343949	0.570121
YKL216W	URA1	175	0.165864	0.211006	0.158284	0.185364	0.0986991	0.113824	0.143885	0.0543041	0.110401	0.133091	0.180709	0.0556348	0.198319	0.581339	0.869798	0.747309	0.787332	0.620616	0.805935
YDR099W	BMH2	176	0.202739	0.110241	0.186849	0.273557	0.0647888	0.0638512	0.00118368	0.14177	0.128112	0.225547	0.095158	0.130157	0.178472	0.0998575	0.00535354	0.0988167	0.0252726	0.0966217	0.281235
YBR025C	OLA1	177	0.229819	0.106796	0.228508	0.349218	0.0172901	0.0854648	0.134086	0.00157257	0.0614707	0.157428	0.0972071	0.130404	0.211879	0.222478	0.233421	0.357504	0.360218	0.392188	0.515329
YGR169C-A	LSO2	178	0.235993	0.296884	0.29267	0.2075	0.143438	0.0566596	0.12303	0.125675	0.399186	0.231431	0.105977	0.207828	0.183671	0.249099	0.0186428	0.135139	0.342388	0.233001	0.478873
YKL068W-A	YKL068W-A	179	0.0426607	0.146076	0.244162	0.340425	0.0815266	0.0793871	0.0312009	0.133425	0.147828	0.125976	0.0913331	0.0370358	0.111493	0.36098	0.211959	0.41727	0.440838	0.676371	0.415189
YPL237W	SUI3	180	0.230671	0.156631	0.238499	0.245063	0.0516195	0.0811176	0.121916	0.111237	0.0917309	0.0484803	0.105962	0.0850639	0.250511	0.365639	0.491156	0.371257	0.429246	0.398399	0.582356
YDR002W	YRB1	181	0.239273	0.182042	0.259016	0.255633	0.0648287	0.0164049	0.182437	0.164562	0.141738	0.113523	0.147467	0.138941	0.187489	0.364187	0.350561	0.385623	0.414457	0.41884	0.621917
YDL182W	LYS20	182	0.0749374	0.105053	0.148292	0.271029	0.146187	0.0843864	0.239056	0.0146046	0.114332	0.15719	0.0819331	0.0717334	0.026058	0.0785669	0.119171	0.0414193	0.0807865	0.115306	0.0569312
YGL031C	RPL24A	183	0.206673	0.0617943	0.228589	0.158347	0.0591294	0.0496234	0.141774	0.0307309	0.0969094	0.0108428	0.0710376	0.0540157	0.166436	0.420328	0.377847	0.495005	0.344675	0.378435	0.664263
YMR309C	NIP1	184	0.155588	0.0373398	0.198348	0.227569	0.0322713	0.090967	0.139314	0.205504	0.0783498	0.156576	0.177865	0.109391	0.119123	0.276456	0.481735	0.409904	0.330767	0.306346	0.561121
YLL060C	GTT2	185	0.212601	0.0960373	0.143169	0.261669	0.0650074	0.119425	0.0767874	0.0452805	0.256507	0.0267012	0.0239273	0.0564748	0.100786	0.550671	0.456116	0.44711	0.430309	0.596306	0.691923
YDR086C	SSS1	186	0.22088	0.134732	0.233365	0.301983	0.0464458	0.0858185	0.085682	0.0280451	0.144652	0.203185	0.136546	0.111878	0.322974	0.427718	0.442852	0.312619	0.269868	0.448649	0.833128
YDR276C	PMP3	187	0.129377	0.149047	0.138349	0.184996	0.174118	0.207896	0.183197	0.07662	0.183044	0.226689	0.188242	0.0753661	0.216267	0.36565	0.0356552	0.0814998	0.0966494	0.217795	0.33835
YDR533C	HSP31	188	0.166566	0.174827	0.133566	0.243367	0.201773	0.152543	0.135729	0.127805	0.249186	0.265011	0.151167	0.165398	0.440814	0.0602001	0.167776	0.136289	0.0677799	0.0365812	0.167903
YDR497C	ITR1	189	0.186595	0.0452577	0.373924	0.149285	0.0915331	0.0802858	0.514221	0.617432	0.260356	0.152429	0.0651065	0.174327	0.260355	0.268352	0.27061	0.268183	0.136761	0.240941	0.349579
YLL045C	RPL8B	190	0.204905	0.0393663	0.28281	0.1781	0.0632734	0.0614775	0.17276	0.116821	0.112123	0.155835	0.11474	0.0399321	0.150016	0.297994	0.0998683	0.240358	0.260501	0.300403	0.589149
YLR214W	FRE1	191	0.288292	0.0449667	0.181206	0.361557	0.0755446	0.166821	0.142453	0.0220465	0.0241493	0.110604	0.157484	0.164094	0.138069	0.0134145	0.0854107	0.241866	0.336101	0.154604	0.216064
YDR155C	CPR1	192	0.146532	0.199946	0.246437	0.413845	0.073066	0.189894	0.0425025	0.169686	0.175568	0.330163	0.192516	0.0721235	0.0732544	0.148636	0.00438871	0.111146	0.0178733	0.214524	0.299179
YDR171W	HSP42	193	0.308891	0.20936	0.382218	0.630221	0.0908033	0.20658	0.143567	0.218945	0.207825	0.201757	0.0680955	0.500174	0.136366	0.202931	0.525063	0.0749434	0.254587	0.221622	0.456186
YLR150W	STM1	194	0.204983	0.054131	0.299736	0.187519	0.0525387	0.112286	0.17733	0.148094	0.139896	0.171673	0.0525115	0.0435864	0.15677	0.305174	0.042454	0.257397	0.123563	0.212291	0.563459
YOR007C	SGT2	195	0.238136	0.171853	0.294328	0.410235	0.0399268	0.0797968	0.113299	0.167416	0.177469	0.0323819	0.133196	0.0522806	0.10983	0.192447	0.214329	0.338029	0.352725	0.37261	0.543582
YDR363W-A	SEM1	196	0.342587	0.183291	0.312506	0.371533	0.0976775	0.10126	0.26718	0.0499878	0.302596	0.0763523	0.156581	0.0558648	0.197423	0.512342	0.648767	0.446252	0.405062	0.482891	0.659059
YDL232W	OST4	197	0.239161	0.0697514	0.250519	0.339198	0.0953048	0.0730232	0.176804	0.333393	0.420666	0.231142	0.0724805	0.0586195	0.251404	0.455412	0.745052	0.397282	0.225637	0.42857	0.634102
YGL054C	ERV14	198	0.152839	0.159115	0.159686	0.285172	0.126815	0.0621361	0.029154	0.239592	0.157451	0.223811	0.0988469	0.129517	0.136703	0.330662	0.492468	0.433591	0.451663	0.480702	0.745269
YNL209W	SSB2	199	0.118701	0.133268	0.161029	0.160982	0.042026	0.0724934	0.132012	0.0785761	0.163544	0.219006	0.181814	0.142555	0.0531206	0.286545	0.214801	0.33654	0.22926	0.341378	0.521174
YNL067W	RPL9B	200	0.14235	0.165901	0.158754	0.219471	0.055134	0.0402343	0.11402	0.104318	0.0236502	0.117839	0.190687	0.0687947	0.310554	0.341838	0.34048	0.363335	0.241113	0.352408	0.567928
YOR136W	IDH2	201	0.199391	0.0626426	0.250755	0.219726	0.0719424	0.142997	0.0817625	0.00218995	0.199674	0.114477	0.214711	0.086149	0.265091	0.15965	0.0131251	0.277479	0.0381902	0.193475	0.130764
YNL036W	NCE103	202	0.137977	0.0610377	0.371374	0.478797	0.178781	0.153986	0.201511	0.0225659	0.344305	0.400758	0.249725	0.0472668	0.316795	0.581747	0.691055	0.140544	0.027923	0.296502	0.269895
YJR007W	SUI2	203	0.163663	0.0877524	0.255854	0.264503	0.0552184	0.0452507	0.0833325	0.186647	0.0423256	0.176476	0.0971781	0.0469389	0.174605	0.313903	0.319654	0.352004	0.331977	0.385355	0.431097
YPL037C	EGD1	204	0.190364	0.0740698	0.290735	0.249337	0.0875053	0.0207129	0.112929	0.226221	0.128526	0.184913	0.124226	0.00453384	0.247432	0.276293	0.224738	0.230324	0.149137	0.407002	0.639218
YIL138C	TPM2	205	0.172015	0.0480403	0.343827	0.303374	0.108836	0.0521626	0.198379	0.0201804	0.123866	0.174115	0.150474	0.137114	0.211994	0.405733	0.406079	0.426093	0.387284	0.388345	0.420168
YOL139C	CDC33	206	0.148294	0.0856344	0.279755	0.258861	0.0717969	0.0619165	0.14308	0.260523	0.0765024	0.192875	0.100375	0.0934874	0.284532	0.462205	0.476276	0.466406	0.424629	0.479708	0.614496
YPR165W	RHO1	207	0.136141	0.059925	0.0694743	0.189498	0.11444	0.123097	0.0378492	0.0763596	0.0442405	0.173244	0.126295	0.0884589	0.289858	0.159612	0.172304	0.260061	0.318785	0.33496	0.454873
YBR143C	SUP45	208	0.171444	0.0944133	0.126964	0.208577	0.0602516	0.0578809	0.0769304	0.27973	0.135098	0.187645	0.153839	0.149528	0.142231	0.317534	0.401402	0.408877	0.382647	0.370999	0.499626
YDR345C	HXT3	209	0.147764	0.192326	0.0931908	0.255136	0.0801951	0.18531	0.0891086	0.231526	0.103667	0.196799	0.112734	0.251716	0.0634675	0.0256512	0.193768	0.250077	0.334489	0.271625	0.38674
YPR035W	GLN1	210	0.313495	0.176965	0.0758444	0.797781	0.0739422	0.0484855	0.0305216	0.323419	0.0965441	0.00203448	0.140527	0.124063	0.315061	0.0902034	0.0634959	0.129328	0.163529	0.242015	0.0883145
YNL281W	HCH1	211	0.176068	0.165288	0.179019	0.321889	0.111666	0.0779101	0.139501	0.0539869	0.215176	0.0767494	0.117724	0.148711	0.0574886	0.334606	0.314303	0.496686	0.66989	0.645328	0.662979
YER165W	PAB1	212	0.171265	0.0348415	0.216172	0.184847	0.0410849	0.0452174	0.15844	0.139914	0.13431	0.207822	0.169718	0.122783	0.110804	0.223224	0.114625	0.284039	0.094254	0.237786	0.413123
YNL244C	SUI1	213	0.265547	0.149653	0.0913652	0.206889	0.0357958	0.0381747	0.117886	0.0754126	0.11208	0.0267875	0.0940736	0.0812533	0.258896	0.498979	0.616539	0.385517	0.589375	0.404711	0.624626
YDL084W	SUB2	214	0.0771098	0.0734534	0.166219	0.272221	0.0755643	0.0558025	0.10507	0.169698	0.0819378	0.216134	0.100616	0.11705	0.250697	0.167471	0.242313	0.294869	0.238127	0.333678	0.468011
YMR038C	CCS1	215	0.205205	0.237162	0.153149	0.311263	0.0613121	0.0653461	0.117654	0.0107463	0.137314	0.0825068	0.130108	0.137266	0.0766178	0.248182	0.216319	0.212031	0.163642	0.467182	0.329068
YNL069C	RPL16B	216	0.162151	0.146485	0.146122	0.23397	0.0905126	0.122831	0.0717152	0.162665	0.129031	0.0984228	0.146953	0.0582663	0.135115	0.29164	0.217822	0.386892	0.269414	0.419381	0.63774
YBR082C	UBC4	217	0.253446	0.142143	0.267418	0.473493	0.0956645	0.117991	0.137082	0.160268	0.152182	0.173348	0.131198	0.0453278	0.195031	0.12802	0.234579	0.146704	0.11166	0.266395	0.445734
YBR079C	RPG1	218	0.158707	0.0650852	0.248378	0.225573	0.0392046	0.0586788	0.134438	0.183854	0.0783938	0.20772	0.170172	0.193498	0.100768	0.270769	0.412168	0.343268	0.280186	0.308171	0.528495
YOR226C	ISU2	219	0.0646359	0.172541	0.136096	0.282307	0.103077	0.152775	0.100249	0.0373986	0.202358	0.111141	0.0798008	0.0638308	0.0283302	0.304693	0.0592879	0.0767187	0.0834823	0.343032	0.152494
YLR043C	TRX1	220	0.168295	0.319998	0.317443	0.271108	0.0829231	0.0332249	0.0150168	0.340097	0.189226	0.177891	0.0700643	0.224272	0.265771	0.400356	0.377818	0.374018	0.472373	0.538897	0.681974
YPL091W	GLR1	221	0.138353	0.0923291	0.118662	0.23496	0.0434396	0.0466077	0.0247845	0.172066	0.133234	0.105024	0.0705801	0.199883	0.123527	0.244069	0.222263	0.327331	0.228782	0.269551	0.316891
YOR383C	FIT3	222	0.203974	0.0628326	0.18905	0.207631	0.0913622	0.194762	0.166593	0.0614111	0.222167	0.189655	0.254706	0.207633	0.425742	0.236444	0.195098	0.00237505	0.17785	0.130577	0.382534
YMR260C	TIF11	223	0.150909	0.131503	0.305865	0.239179	0.0990692	0.050597	0.138249	0.099446	0.129052	0.176265	0.0483731	0.0991963	0.237242	0.446129	0.25638	0.500746	0.403832	0.382108	0.442769
YGL135W	RPL1B	224	0.20343	0.153611	0.25589	0.253095	0.0207528	0.156452	0.21397	0.154537	0.146356	0.2524	0.117124	0.0137352	0.0849189	0.321617	0.455696	0.433594	0.339045	0.454006	0.761137
YOR344C	TYE7	225	0.14053	0.153535	0.131507	0.223175	0.0846281	0.108282	0.0379822	0.242863	0.120073	0.0812962	0.281139	0.191928	0.163837	0.477045	0.574186	0.577066	0.457883	0.637356	0.62706
YJR109C	CPA2	226	0.0397689	0.0540776	0.169029	0.115534	0.0180141	0.170406	0.0582975	0.124212	0.0928708	0.0524893	0.124387	0.142549	0.0422597	0.282254	0.336877	0.425745	0.454699	0.603311	0.489466
YKL172W	EBP2	227	0.253028	0.0943299	0.349478	0.268928	0.152251	0.155203	0.234126	0.110758	0.260521	0.077062	0.164469	0.143252	0.112825	0.351872	0.545819	0.348805	0.496596	0.394112	0.470839
YGR240C	PFK1	228	0.159324	0.0739092	0.0782009	0.104007	0.0372572	0.0582147	0.0223297	0.186402	0.0818173	0.11836	0.167722	0.164804	0.21495	0.300825	0.153945	0.35503	0.21805	0.321668	0.516356
YNL255C	GIS2	229	0.197979	0.115515	0.206564	0.251655	0.0382063	0.116557	0.242025	0.310137	0.09388	0.181836	0.121121	0.0841325	0.223558	0.411632	0.404093	0.28001	0.445449	0.386706	0.722123
YPR158W	CUR1	230	0.2516	0.146123	0.236179	0.466353	0.0711175	0.133895	0.100578	0.234414	0.0364834	0.0836518	0.263934	0.195576	0.147269	0.160341	0.220412	0.353298	0.465977	0.371078	0.303785
YBR189W	RPS9B	231	0.0942597	0.148243	0.269349	0.241575	0.078822	0.0868005	0.13703	0.204992	0.171838	0.264267	0.0337895	0.131698	0.126035	0.369915	0.331825	0.460765	0.320414	0.427094	0.63578
YPL225W	YPL225W	232	0.134301	0.171677	0.276995	0.29545	0.0346774	0.116675	0.0583976	0.150989	0.228779	0.257595	0.121599	0.0824196	0.345547	0.313921	0.413221	0.265959	0.362456	0.322573	0.419238
YNL327W	EGT2	233	0.11805	0.0367989	0.0985699	0.228072	0.0871546	0.0945848	0.0727229	0.280153	0.140441	0.200475	0.179824	0.257494	0.3102	0.171937	0.139803	0.0657681	0.0312177	0.169431	0.20576
YGR085C	RPL11B	234	0.220158	0.101279	0.311424	0.331876	0.104981	0.0321048	0.10807	0.102538	0.127106	0.0565438	0.112769	0.0528327	0.209444	0.379943	0.423006	0.332322	0.402133	0.427883	0.662177
YKL182W	FAS1	235	0.0828444	0.0437864	0.0749709	0.175349	0.0792826	0.063681	0.106147	0.384578	0.0798833	0.18932	0.197191	0.0901329	0.249338	0.208774	0.197497	0.158043	0.103572	0.21853	0.415209
YAL035W	FUN12	236	0.204118	0.106476	0.261991	0.225439	0.120522	0.0723931	0.19292	0.144801	0.176195	0.229035	0.177276	0.234064	0.143492	0.259548	0.18978	0.293026	0.278398	0.213381	0.380888
YHR008C	SOD2	237	0.191961	0.130268	0.0708822	0.251203	0.0566506	0.131424	0.0224309	0.0453699	0.271758	0.157655	0.0748555	0.116324	0.0351023	0.00492408	0.222104	0.139715	0.260174	0.134849	0.00717652
YER036C	ARB1	238	0.182108	0.100817	0.228819	0.272165	0.0183545	0.0756303	0.133785	0.00210203	0.139669	0.173167	0.107577	0.206045	0.0478681	0.279638	0.463167	0.363481	0.429733	0.363875	0.553523
YLR346C	YLR346C	239	0.0967855	0.167793	0.150093	0.456914	0.164623	0.185411	0.199456	0.0243458	0.126552	0.174283	0.237912	0.0523474	0.205992	0.289712	0.176442	0.360296	0.550817	0.411553	0.348885
YBR085C-A	YBR085C-A	240	0.233491	0.320097	0.12308	0.151379	0.0668084	0.0947678	0.144802	0.319947	0.155561	0.217757	0.247489	0.147648	0.436998	0.204278	0.142832	0.254837	0.129646	0.330223	0.319068
YLR300W	EXG1	241	0.147754	0.119473	0.192041	0.0274293	0.0598973	0.197029	0.046984	0.275093	0.178444	0.256404	0.112683	0.172665	0.399213	0.217273	0.1094	0.200373	0.129543	0.305983	0.315161
YER048W-A	ISD11	242	0.133646	0.23626	0.149437	0.0909393	0.137907	0.115137	0.0479891	0.130124	0.173291	0.0710226	0.0415232	0.0855991	0.215319	0.425752	0.547387	0.182652	0.702052	0.598769	0.512114
YOR096W	RPS7A	243	0.0905166	0.104256	0.144582	0.19014	0.126001	0.125216	0.0497414	0.187413	0.0380772	0.120173	0.109451	0.0577319	0.292438	0.383901	0.344714	0.408514	0.442673	0.501349	0.771053
YMR116C	ASC1	244	0.130368	0.0358285	0.0880495	0.198089	0.133444	0.0962552	0.0151426	0.0707909	0.0888299	0.174149	0.0761189	0.108464	0.223571	0.358945	0.291773	0.306594	0.360619	0.45797	0.770796
YOR210W	RPB10	245	0.172991	0.0685428	0.177209	0.269134	0.195018	0.179504	0.0178368	0.123184	0.0570589	0.147296	0.100809	0.130821	0.277994	0.369985	0.239651	0.534637	0.638239	0.405623	0.814489
YPL231W	FAS2	246	0.0988318	0.0269844	0.131887	0.101491	0.0358553	0.079025	0.139162	0.416847	0.123981	0.167095	0.167182	0.187359	0.207795	0.251462	0.233355	0.2562	0.190217	0.276695	0.441161
YDR194C	MSS116	247	0.150696	0.0786772	0.199081	0.246023	0.0310628	0.0590491	0.112963	0.207306	0.0943397	0.141781	0.181514	0.213537	0.194529	0.264897	0.45151	0.440363	0.391326	0.352202	0.496278
YKL043W	PHD1	248	0.116663	0.0472897	0.180347	0.343736	0.115971	0.244197	0.0632846	0.136611	0.172226	0.214036	0.137145	0.254047	0.19942	0.309203	0.239829	0.219176	0.286056	0.258335	0.249826
YDL168W	SFA1	249	0.155411	0.180563	0.114034	0.320636	0.0529384	0.100269	0.0775483	0.0557367	0.169505	0.0722467	0.140376	0.0738885	0.182703	0.253554	0.197927	0.332291	0.383722	0.338045	0.378886
YML091C	RPM2	250	0.223709	0.0124167	0.164625	0.255949	0.101808	0.0873301	0.0815475	0.144302	0.122296	0.14063	0.176477	0.108291	0.0316967	0.0805126	0.116753	0.0638007	0.0466951	0.0892882	0.0809177
YER021W	RPN3	251	0.128797	0.108914	0.162736	0.218805	0.0444972	0.0923647	0.0559246	0.191078	0.0755258	0.136773	0.125532	0.119311	0.233935	0.236764	0.465108	0.415182	0.326869	0.323227	0.518395
YNL079C	TPM1	252	0.210239	0.103249	0.332896	0.297314	0.209743	0.053166	0.164395	0.002013	0.105281	0.152416	0.114722	0.150621	0.194899	0.153886	0.0604936	0.116558	0.0572485	0.196906	0.306436
YGL028C	SCW11	253	0.150572	0.053665	0.0662911	0.22806	0.0658225	0.048149	0.0925756	0.184109	0.0939283	0.263986	0.191407	0.221442	0.310721	0.201398	0.131641	0.107211	0.0504012	0.166894	0.207931
YCL050C	APA1	254	0.263472	0.119494	0.310731	0.372268	0.0547145	0.0848378	0.209917	0.0541392	0.0397778	0.247012	0.175569	0.153619	0.080185	0.192198	0.198574	0.254043	0.46999	0.365534	0.412754
YOR204W	DED1	255	0.167156	0.0950688	0.102439	0.193452	0.0612012	0.0593951	0.0223849	0.0409007	0.0990683	0.184829	0.154951	0.151313	0.112114	0.214104	0.253567	0.231868	0.221009	0.283163	0.475455
YPL135W	ISU1	256	0.12184	0.00928751	0.0983343	0.0882791	0.0776499	0.0275713	0.0455571	0.0265655	0.246975	0.0421729	0.240859	0.102666	0.187884	0.160738	0.0219234	0.0399413	0.0918905	0.0272286	0.0179463
YNL131W	TOM22	257	0.135036	0.14304	0.155199	0.337376	0.0706246	0.0738228	0.0408756	0.0428059	0.266262	0.303645	0.193417	0.0634324	0.070121	0.206604	0.209282	0.359381	0.284794	0.294939	0.364995
YML106W	URA5	258	0.114823	0.104207	0.201698	0.235554	0.0277997	0.111982	0.0438729	0.124352	0.00217928	0.254827	0.176081	0.136878	0.19447	0.425969	0.396893	0.441769	0.509231	0.452332	0.668515
YHR193C	EGD2	259	0.224934	0.167404	0.329785	0.273398	0.0975392	0.0650498	0.173665	0.0242085	0.144937	0.174443	0.0671991	0.0148469	0.0526741	0.284423	0.0475536	0.206027	0.0855169	0.306264	0.441187
YOL127W	RPL25	260	0.131493	0.129408	0.252002	0.217049	0.0542307	0.036497	0.136453	0.105043	0.169068	0.099034	0.0208131	0.0935182	0.208478	0.467828	0.443267	0.518122	0.591488	0.566902	0.905195
YLR372W	ELO3	261	0.0940944	0.0861966	0.108463	0.195947	0.059214	0.0461377	0.101348	0.16351	0.127555	0.170443	0.108343	0.215881	0.156511	0.276748	0.343886	0.389383	0.389751	0.38855	0.599765
YOR382W	FIT2	262	0.167097	0.0878451	0.114936	0.214231	0.268071	0.477555	0.0101211	0.110165	0.279104	0.0964776	0.32741	0.111793	0.47019	0.582957	0.667297	0.344586	0.429733	0.072735	0.116561
YGR118W	RPS23A	263	0.153726	0.182467	0.0804288	0.118394	0.0497174	0.120245	0.105332	0.36052	0.0462721	0.0212979	0.0651511	0.110993	0.189235	0.365533	0.357656	0.522584	0.550231	0.596038	0.7772
YKL164C	PIR1	264	0.193588	0.0844371	0.122447	0.233577	0.035862	0.0522889	0.0295944	0.243639	0.127711	0.208168	0.0841932	0.140076	0.224549	0.0703097	0.00913881	0.0130211	0.0143237	0.128491	0.219096
YLR048W	RPS0B	265	0.153122	0.11876	0.151405	0.215432	0.0621999	0.10124	0.163526	0.123961	0.141965	0.225322	0.124892	0.088213	0.0892199	0.301167	0.122759	0.378258	0.21211	0.335237	0.620606
YHR082C	KSP1	266	0.273191	0.115725	0.256037	0.326971	0.0407567	0.0619258	0.111929	0.0680691	0.0440865	0.205336	0.234169	0.221274	0.0983101	0.0766418	0.112416	0.275233	0.11129	0.16737	0.323588
YLR175W	CBF5	267	0.180805	0.143697	0.211209	0.242013	0.106202	0.102387	0.234232	0.1553	0.164212	0.0587304	0.108826	0.141967	0.125354	0.269442	0.405576	0.442169	0.384089	0.368121	0.603972
YGR254W	ENO1	268	0.123314	0.118511	0.453385	0.287782	0.133698	0.298503	0.411926	0.348897	0.164657	0.183258	0.242486	0.124061	0.490634	0.218371	0.00932928	0.378514	0.17369	0.470886	0.426168
YGR159C	NSR1	269	0.145408	0.196839	0.183352	0.158033	0.143739	0.157716	0.274001	0.130323	0.161523	0.0860636	0.12892	0.00635273	0.0331946	0.425766	0.739948	0.420255	0.403417	0.534353	0.74411
YCR021C	HSP30	270	0.162006	0.0277475	0.0860079	0.483789	0.134074	0.0921012	0.123713	0.0623911	0.154878	0.117782	0.205121	0.346784	0.0976719	0.00192385	0.0638668	0.363901	0.336526	0.130876	0.0773937
YEL040W	UTR2	271	0.127814	0.0903333	0.0737894	0.207098	0.0825492	0.113227	0.0780721	0.307803	0.0767108	0.128451	0.101956	0.143349	0.24663	0.351469	0.517412	0.408	0.435723	0.379042	0.474973
YKL082C	RRP14	272	0.238692	0.128845	0.328615	0.210068	0.20684	0.126206	0.275254	0.184835	0.263998	0.0769019	0.212286	0.152923	0.137767	0.367163	0.625207	0.498293	0.483294	0.398265	0.540682
YBR109C	CMD1	273	0.133333	0.133904	0.254292	0.359181	0.0101893	0.0238288	0.0745535	0.137571	0.115667	0.344964	0.158058	0.088937	0.188763	0.220899	0.336175	0.379886	0.213791	0.32856	0.565257
YNL287W	SEC21	274	0.149053	0.00894704	0.146382	0.269112	0.038753	0.0211445	0.0328419	0.220779	0.076221	0.270986	0.185768	0.211262	0.157897	0.182147	0.274527	0.361964	0.212273	0.229643	0.488872
YML058W	SML1	275	0.228038	0.119589	0.284597	0.0641522	0.106741	0.165543	0.0957275	0.0316615	0.249217	0.115147	0.0428233	0.195724	0.377095	0.398315	0.328976	0.148152	0.234474	0.37784	0.330271
YDR071C	PAA1	276	0.240474	0.08665	0.236399	0.216518	0.105004	0.013698	0.00478171	0.192284	0.0301346	0.0842719	0.131772	0.0487434	0.154106	0.314142	0.285744	0.375174	0.384793	0.388185	0.465314
YER025W	GCD11	277	0.191321	0.111594	0.192264	0.201611	0.0551532	0.0553292	0.180914	0.0485417	0.167132	0.0997292	0.130094	0.147826	0.13445	0.321751	0.366625	0.425919	0.373574	0.294946	0.52528
YDL243C	AAD4	278	0.1785	0.107251	0.167628	0.358232	0.0979358	0.114684	0.0152509	0.0825469	0.239028	0.237218	0.105966	0.110291	0.0893903	0.340829	0.105001	0.436435	0.354405	0.40816	0.247659
YLR136C	TIS11	279	0.4342	0.414251	0.191885	0.25335	0.174679	0.066247	0.0764719	0.471537	0.0814907	0.329667	0.315621	0.145163	0.464142	0.545183	0.362729	0.619975	0.671751	0.480702	0.477259
YBR011C	IPP1	280	0.164928	0.120287	0.20673	0.201536	0.0440073	0.130185	0.22847	0.0223259	0.132341	0.164957	0.12335	0.0290746	0.0759432	0.219313	0.0451232	0.0968317	0.00396062	0.263377	0.40846
YEL026W	SNU13	281	0.183028	0.050274	0.156857	0.29552	0.0396449	0.0372403	0.116273	0.0899547	0.162987	0.130455	0.148056	0.0527282	0.178685	0.400732	0.412928	0.308929	0.444761	0.45041	0.564138
YNL121C	TOM70	282	0.164325	0.0664959	0.177505	0.263694	0.033948	0.0458621	0.0768087	0.283265	0.0811083	0.273059	0.111661	0.222902	0.0681526	0.129707	0.237297	0.291015	0.223777	0.199354	0.355025
YDL126C	CDC48	283	0.142082	0.100547	0.0970924	0.167622	0.0436861	0.0557456	0.027692	0.214089	0.110605	0.212059	0.0930441	0.168552	0.165772	0.150145	0.0591143	0.193759	0.0729755	0.156332	0.331851
YPR132W	RPS23B	284	0.164324	0.169425	0.131943	0.223242	0.011519	0.0273891	0.101155	0.0161709	0.0880342	0.0228464	0.107856	0.135723	0.237123	0.413553	0.324375	0.524655	0.387351	0.440146	0.737139
YBR162C	TOS1	285	0.11957	0.0199559	0.0642767	0.181392	0.0696264	0.048165	0.0469439	0.204654	0.0741305	0.253434	0.196484	0.140935	0.24098	0.167256	0.18137	0.207471	0.0929394	0.218495	0.317522
YLR180W	SAM1	286	0.164694	0.302003	0.357247	0.545757	0.0297364	0.112407	0.234369	0.179385	0.162485	0.0785587	0.175356	0.169458	0.078177	0.059149	0.0842943	0.0676373	0.0550836	0.277432	0.185303
YPR133W-A	TOM5	287	0.305262	0.0592972	0.15754	0.307464	0.17544	0.151528	0.0437544	0.0424807	0.251911	0.351031	0.176292	0.108612	0.316367	0.434631	0.368617	0.216637	0.297571	0.490843	0.949565
YJL148W	RPA34	288	0.209162	0.145939	0.34084	0.183452	0.176698	0.15207	0.299915	0.143836	0.156386	0.0258382	0.100856	0.105627	0.0561184	0.359518	0.502745	0.373961	0.374301	0.386407	0.586087
YGR264C	MES1	289	0.103959	0.0948385	0.160701	0.165976	0.0566329	0.0706425	0.0937581	0.25861	0.0827214	0.209436	0.163247	0.125579	0.0860881	0.247113	0.381625	0.288248	0.322617	0.349651	0.521632
YJL124C	LSM1	290	0.197339	0.134203	0.286422	0.281694	0.0931223	0.0450457	0.0114791	0.154263	0.110895	0.169372	0.0706534	0.0448322	0.355568	0.231014	0.316677	0.209031	0.131481	0.308905	0.429941
YBL076C	ILS1	291	0.135455	0.0654263	0.072085	0.140788	0.0103584	0.0784221	0.105246	0.0590805	0.0829246	0.159593	0.193866	0.150396	0.058984	0.206453	0.192778	0.296865	0.198838	0.244818	0.400445
YLL028W	TPO1	292	0.0833791	0.143082	0.085673	0.107186	0.0956936	0.0737767	0.0141299	0.0589788	0.133068	0.0428517	0.113557	0.223339	0.109264	0.0113463	0.0793384	0.0146498	0.126477	0.107165	0.060596
YER148W	SPT15	293	0.15493	0.15828	0.1205	0.179422	0.0341365	0.0124178	0.0967184	0.0403652	0.146091	0.0162898	0.07931	0.0464305	0.229972	0.350402	0.215458	0.321104	0.454963	0.333019	0.565872
YHR143W-A	RPC10	294	0.285977	0.139179	0.198169	0.266515	0.155565	0.172846	0.0764406	0.0805677	0.116762	0.051061	0.0559678	0.0874072	0.272778	0.502485	0.756465	0.360989	0.435053	0.654305	0.727119
YIL078W	THS1	295	0.132888	0.0911511	0.162036	0.207888	0.0197017	0.0626019	0.213916	0.131099	0.0336138	0.183278	0.15053	0.158333	0.107474	0.234313	0.217586	0.335408	0.227816	0.238353	0.447799
YKL040C	NFU1	296	0.178801	0.0953603	0.103233	0.222174	0.0698248	0.0609027	0.0704984	0.150396	0.0913104	0.018466	0.0864539	0.0590967	0.132581	0.298439	0.376903	0.403448	0.399578	0.395608	0.623487
YKL180W	RPL17A	297	0.0983273	0.162388	0.192352	0.208669	0.0408691	0.062725	0.0144464	0.0800173	0.114462	0.047552	0.0721726	0.0881059	0.210904	0.331856	0.155734	0.325429	0.365725	0.360679	0.674694
YGL058W	RAD6	298	0.160686	0.121987	0.276703	0.312811	0.113982	0.0198434	0.147716	0.20693	0.0516403	0.198818	0.174387	0.149835	0.19689	0.289564	0.467761	0.375143	0.284909	0.39524	0.283092
YJL111W	CCT7	299	0.12133	0.0801407	0.200965	0.17571	0.0545107	0.0321164	0.0738469	0.174128	0.0554636	0.199094	0.127089	0.174502	0.137103	0.150589	0.34742	0.305647	0.365091	0.295554	0.444846
YGR086C	PIL1	300	0.128776	0.135773	0.0799303	0.257829	0.0672822	0.0692184	0.00360885	0.27047	0.124957	0.227915	0.295324	0.0388209	0.169243	0.0254289	0.00751092	0.0529494	0.114546	0.00881692	0.0587742
YMR108W	ILV2	301	0.156797	0.0602055	0.147456	0.218266	0.0282978	0.0665066	0.191558	0.180874	0.0957861	0.152352	0.141981	0.138143	0.0624303	0.200714	0.0729085	0.175821	0.0519597	0.190555	0.258345
YPR102C	RPL11A	302	0.0924701	0.212008	0.27973	0.274732	0.0781743	0.0815567	0.159699	0.131803	0.0901071	0.202217	0.0753834	0.0989345	0.22915	0.415082	0.325832	0.475707	0.252178	0.505892	0.717536
YDL014W	NOP1	303	0.178701	0.136339	0.189851	0.216274	0.0257347	0.115143	0.109306	0.12038	0.104036	0.0669435	0.038613	0.0971175	0.100187	0.301081	0.443971	0.338985	0.317687	0.390806	0.543845
YHR027C	RPN1	304	0.176395	0.0878905	0.190033	0.159437	0.0233862	0.0346134	0.0559776	0.232403	0.0925169	0.199702	0.17862	0.216718	0.0927872	0.201979	0.184506	0.322976	0.257788	0.180247	0.377049
YOR312C	RPL20B	305	0.154635	0.165668	0.227975	0.241346	0.0370213	0.0907013	0.105016	0.154349	0.108285	0.234495	0.110627	0.02555	0.250634	0.376711	0.295281	0.368975	0.364107	0.532092	0.727366
YOR261C	RPN8	306	0.179406	0.0739611	0.250302	0.27602	0.0101307	0.087777	0.0956902	0.262382	0.081304	0.155689	0.139599	0.140028	0.200878	0.283931	0.363974	0.446473	0.250887	0.343137	0.473179
YIL075C	RPN2	307	0.198318	0.0489778	0.174424	0.205073	0.0247987	0.0430385	0.0892566	0.170457	0.116545	0.153962	0.182055	0.210904	0.120184	0.174425	0.300477	0.288947	0.191782	0.227828	0.454997
YLR388W	RPS29A	308	0.235542	0.193606	0.0390724	0.143207	0.13749	0.0235048	0.0686618	0.338293	0.342804	0.190255	0.118213	0.223643	0.251707	0.509254	0.260729	0.117809	0.0750614	0.322088	0.531563
YLR342W	FKS1	309	0.132204	0.0386321	0.0444848	0.139967	0.00356398	0.0689417	0.0578282	0.202179	0.118695	0.185444	0.149253	0.146442	0.195056	0.227224	0.184165	0.288153	0.153388	0.262993	0.414517
YPL145C	KES1	310	0.109835	0.0955077	0.130666	0.168189	0.0569171	0.0774793	0.0602747	0.26474	0.065854	0.11076	0.144061	0.176188	0.177369	0.18788	0.191871	0.260411	0.252999	0.163137	0.466154
YGL147C	RPL9A	311	0.0765638	0.0921266	0.193481	0.151767	0.0771459	0.0594288	0.16426	0.228027	0.0625777	0.144582	0.0724848	0.02417	0.240858	0.38236	0.561016	0.495336	0.473625	0.536466	0.834034
YDR427W	RPN9	312	0.158836	0.130266	0.143695	0.246372	0.0466956	0.0579931	0.0214586	0.172234	0.182205	0.237608	0.1815	0.153777	0.184082	0.189936	0.421824	0.487926	0.513122	0.354763	0.551444
YCL031C	RRP7	313	0.181264	0.108249	0.25019	0.201883	0.098829	0.0527706	0.147556	0.134057	0.0940576	0.0518464	0.115882	0.0393726	0.279184	0.336679	0.42975	0.281049	0.350943	0.343643	0.429908
YMR205C	PFK2	314	0.10072	0.0768275	0.0863662	0.0999557	0.042176	0.0675476	0.0144422	0.245423	0.120011	0.155767	0.133428	0.163694	0.105827	0.258771	0.123369	0.300429	0.11202	0.300379	0.421
YOR276W	CAF20	315	0.22835	0.186326	0.267172	0.275607	0.0434293	0.0628833	0.134005	0.135043	0.0745898	0.0850883	0.0575969	0.0538036	0.326575	0.538514	0.540256	0.610416	0.554311	0.664069	0.677362
YNR051C	BRE5	316	0.219316	0.111441	0.237736	0.231689	0.0486811	0.0484609	0.152535	0.166957	0.195073	0.127708	0.201468	0.129709	0.0800388	0.248778	0.299027	0.224369	0.344084	0.293069	0.431691
YDL185W	VMA1	317	0.12443	0.0604903	0.0489027	0.114484	0.0702623	0.0204089	0.0107818	0.183844	0.0680117	0.205443	0.144929	0.217911	0.0946702	0.141995	0.0616722	0.250684	0.148195	0.138362	0.389666
YIL142W	CCT2	318	0.158538	0.0781982	0.228469	0.273391	0.0240732	0.0613083	0.137076	0.0185323	0.12094	0.110232	0.116569	0.117122	0.149402	0.25701	0.316175	0.34544	0.28995	0.406491	0.468365
YFR033C	QCR6	319	0.0701412	0.184088	0.24174	0.156671	0.259869	0.0682277	0.209828	0.120279	0.302941	0.144419	0.207791	0.133504	0.38125	0.0431293	0.268445	0.0133073	0.0799556	0.0203358	0.119654
YGL030W	RPL30	320	0.212499	0.268351	0.154892	0.159957	0.039324	0.0508979	0.0522776	0.26907	0.0325051	0.184546	0.107694	0.0765689	0.275837	0.506953	0.532885	0.679727	0.662472	0.773345	0.88443
YMR012W	CLU1	321	0.135572	0.0193352	0.151523	0.233831	0.0349061	0.0656389	0.0866099	0.254426	0.11796	0.26043	0.215637	0.207083	0.158371	0.252386	0.23796	0.375642	0.220933	0.221011	0.527559
YPR108W	RPN7	322	0.153817	0.152175	0.217915	0.231085	0.0572258	0.0696847	0.0979339	0.241673	0.0538769	0.154958	0.113441	0.187768	0.304898	0.297581	0.408925	0.391005	0.345023	0.256161	0.492126
YBR067C	TIP1	323	0.251389	0.13914	0.12059	0.299632	0.150348	0.156269	0.101916	0.0143176	0.242576	0.178257	0.140698	0.186089	0.172576	0.00749204	0.149767	0.0195841	0.135818	0.209446	0.3841
YBR158W	AMN1	324	0.156568	0.080673	0.033296	0.182671	0.0392222	0.0681893	0.027694	0.205585	0.108853	0.215933	0.135852	0.117774	0.409381	0.184248	0.242356	0.208821	0.208883	0.246863	0.31499
YBL028C	YBL028C	325	0.282771	0.181723	0.390969	0.376897	0.162714	0.12917	0.318171	0.421529	0.258597	0.0495561	0.100198	0.0971381	0.304922	0.447057	0.629714	0.536344	0.680906	0.45334	0.765417
YDL208W	NHP2	326	0.166751	0.118339	0.330634	0.298384	0.0789669	0.0666599	0.231223	0.10632	0.167845	0.133458	0.0777858	0.0522868	0.0882504	0.471603	0.486189	0.382077	0.314512	0.466713	0.599952
YER102W	RPS8B	327	0.209218	0.149027	0.313625	0.359619	0.0415982	0.0550811	0.1663	0.112739	0.222295	0.070587	0.112787	0.0444849	0.268795	0.377862	0.392215	0.309998	0.461091	0.465725	0.736567
YKL156W	RPS27A	328	0.250166	0.159275	0.121345	0.200506	0.0308379	0.0369544	0.00489835	0.0951778	0.138011	0.181594	0.100104	0.10214	0.116392	0.38898	0.384764	0.374987	0.484722	0.373027	0.551912
YPL274W	SAM3	329	0.0966373	0.213965	0.149038	0.485511	0.0458833	0.0996327	0.0258353	0.0336858	0.194247	0.0183212	0.0873984	0.177621	0.0677691	0.202328	0.0027471	0.279712	0.28555	0.392659	0.280276
YNL180C	RHO5	330	0.15532	0.0999393	0.155266	0.290389	0.157577	0.060241	0.082617	0.201774	0.242819	0.150924	0.108514	0.0560722	0.220921	0.0229529	0.020206	0.0999233	0.101482	0.0986243	0.101263
YOR122C	PFY1	331	0.245968	0.149438	0.179863	0.226305	0.0855838	0.0875673	0.0454545	0.136485	0.161102	0.236619	0.153016	0.118321	0.163017	0.309089	0.297237	0.272298	0.488236	0.4483	0.681109
YPL004C	LSP1	332	0.157271	0.178318	0.103095	0.277037	0.22529	0.135412	0.148253	0.291613	0.128492	0.357873	0.0221363	0.241959	0.34557	0.142547	0.11267	0.113038	0.327482	0.294119	0.0324252
YOR310C	NOP58	333	0.190631	0.0788099	0.172729	0.203214	0.027815	0.0867119	0.132248	0.106525	0.0880459	0.165961	0.184945	0.101487	0.0917126	0.362594	0.458423	0.427022	0.417499	0.428467	0.700885
YDL130W	RPP1B	334	0.132046	0.104622	0.139141	0.211844	0.0126403	0.163235	0.0910347	0.109315	0.201145	0.249563	0.0859276	0.119876	0.117888	0.352662	0.197588	0.433727	0.330978	0.494919	0.778144
YMR122W-A	YMR122W-A	335	0.212696	0.240842	0.0663081	0.115964	0.0737905	0.105418	0.0405709	0.00625366	0.259319	0.301166	0.0456672	0.144855	0.214433	0.177995	0.0886355	0.145865	0.127263	0.223893	0.0465237
YOR303W	CPA1	336	0.0169544	0.0357693	0.127945	0.184423	0.118187	0.101604	0.174958	0.024106	0.0523724	0.0250096	0.122445	0.0849635	0.125246	0.109046	0.0692365	0.15797	0.0724166	0.0508234	0.0948275
YOR270C	VPH1	337	0.0964039	0.0511635	0.0303186	0.142402	0.0584161	0.068435	0.00387356	0.186219	0.186869	0.132606	0.181079	0.242015	0.0842466	0.247695	0.316829	0.37593	0.294839	0.324799	0.505635
YGL215W	CLG1	338	0.160575	0.0968728	0.113405	0.203955	0.044346	0.0797709	0.0462555	0.158776	0.0582006	0.24026	0.133675	0.176425	0.106465	0.16705	0.292544	0.243858	0.0779544	0.245087	0.316412
YGL105W	ARC1	339	0.197424	0.0910903	0.230916	0.200293	0.0631207	0.068295	0.0692399	0.103045	0.127193	0.20331	0.0886225	0.115734	0.105703	0.193938	0.0823523	0.155495	0.0571144	0.301718	0.470708
YLR421C	RPN13	340	0.14434	0.117602	0.190206	0.185091	0.0139931	0.0401686	0.0675963	0.264685	0.0694491	0.0327269	0.120582	0.0698166	0.128179	0.378423	0.293634	0.460543	0.467361	0.321961	0.507574
YDR233C	RTN1	341	0.103094	0.0186753	0.149915	0.116172	0.0219472	0.147843	0.0164813	0.130124	0.0894445	0.145776	0.109238	0.048072	0.0633231	0.191907	0.248583	0.123135	0.19544	0.224416	0.418942
YDR054C	CDC34	342	0.210994	0.117583	0.196031	0.261143	0.102663	0.0939655	0.118061	0.279054	0.134373	0.149597	0.15243	0.0676605	0.0547087	0.312988	0.393071	0.282406	0.278764	0.292894	0.37212
YPR074C	TKL1	343	0.18505	0.0552106	0.0493792	0.113789	0.0429504	0.0978322	0.0755329	0.0184402	0.194361	0.12298	0.125494	0.0964099	0.162433	0.204326	0.226905	0.18114	0.152376	0.275683	0.393644
YKL071W	YKL071W	344	0.208477	0.203408	0.182007	0.382412	0.0689448	0.154186	0.0397373	0.1445	0.122478	0.1938	0.0977958	0.105792	0.292962	0.365741	0.400522	0.589166	0.376965	0.53387	0.457702
YDR023W	SES1	345	0.182459	0.157379	0.209404	0.139646	0.0265188	0.0874507	0.137751	0.0852506	0.0471117	0.114167	0.108382	0.0320636	0.139892	0.369459	0.306183	0.372214	0.294662	0.383312	0.576774
YER064C	VHR2	346	0.0416081	0.128308	0.145515	0.125757	0.141153	0.0536024	0.0801773	0.207586	0.0857959	0.133907	0.13146	0.177901	0.0775543	0.181662	0.00827747	0.0631117	0.00554754	0.220008	0.109961
YKR076W	ECM4	347	0.0607301	0.174839	0.270043	0.374816	0.00771282	0.093869	0.049497	0.26303	0.162697	0.124154	0.167492	0.0998593	0.261857	0.112529	0.0451549	0.154509	0.0273913	0.232608	0.0945209
YML026C	RPS18B	348	0.192945	0.149424	0.14114	0.129084	0.0609538	0.0994583	0.0513615	0.233689	0.105134	0.00801048	0.131979	0.0889561	0.248338	0.460448	0.430399	0.623157	0.553776	0.502301	0.715205
YCR093W	CDC39	349	0.184775	0.0319192	0.121294	0.198701	0.0337439	0.03948	0.060354	0.200869	0.0666852	0.187276	0.171744	0.0737468	0.200159	0.204338	0.355582	0.321965	0.380609	0.233706	0.519316
YHR007C	ERG11	350	0.14805	0.157863	0.135155	0.150204	0.0518544	0.0581959	0.00405105	0.225665	0.0293208	0.0898225	0.12487	0.243962	0.214013	0.481154	0.613335	0.608901	0.648184	0.578454	0.744784
YLR390W-A	CCW14	351	0.14949	0.128898	0.084085	0.204606	0.0437293	0.119784	0.0659273	0.0871056	0.116828	0.244748	0.0970167	0.238211	0.145291	0.190976	0.0584872	0.0550476	0.0175181	0.341621	0.143986
YPL226W	NEW1	352	0.15018	0.0609897	0.206749	0.171117	0.0288042	0.0431161	0.155439	0.226382	0.109807	0.161082	0.19111	0.203953	0.0619116	0.324026	0.48862	0.413468	0.330136	0.403115	0.621109
YJR094W-A	RPL43B	353	0.211316	0.149992	0.127446	0.24187	0.047478	0.0467031	0.0839924	0.0779652	0.0895061	0.166369	0.072862	0.128176	0.214893	0.620319	0.587842	0.685553	0.80008	0.667029	0.844452
YDL074C	BRE1	354	0.142121	0.094029	0.216904	0.229366	0.0837735	0.0546829	0.184746	0.200099	0.133367	0.101906	0.158957	0.115816	0.130333	0.170641	0.286997	0.318002	0.341881	0.24309	0.359806
YER026C	CHO1	355	0.133661	0.114319	0.314034	0.120139	0.135249	0.12999	0.404011	0.601478	0.298506	0.193548	0.0584303	0.205207	0.40868	0.291504	0.405534	0.497739	0.298311	0.333845	0.320312
YPL239W	YAR1	356	0.267953	0.142437	0.243797	0.330735	0.144725	0.107442	0.219475	0.119619	0.160514	0.104986	0.0393867	0.126509	0.130259	0.283836	0.559733	0.460891	0.535866	0.39358	0.548493
YLR354C	TAL1	357	0.152263	0.0217835	0.100884	0.214153	0.0343896	0.0639215	0.0779385	0.280726	0.0861462	0.226704	0.137182	0.0935191	0.128018	0.12863	0.113082	0.20111	0.244152	0.203281	0.281814
YDL137W	ARF2	358	0.0908275	0.175871	0.152822	0.175076	0.0926822	0.0786672	0.0680931	0.17412	0.10057	0.177505	0.132837	0.0980292	0.32699	0.154594	0.167386	0.155477	0.214356	0.294548	0.502278
YJR121W	ATP2	359	0.0913814	0.0828436	0.103334	0.132208	0.107063	0.110282	0.151684	0.195795	0.154712	0.240148	0.0778861	0.160032	0.185937	0.0743343	0.209025	0.0879322	0.0456713	0.159211	0.1285
YDR487C	RIB3	360	0.178889	0.158649	0.161818	0.295389	0.0532635	0.0664812	0.133702	0.0833095	0.0724581	0.0466771	0.214971	0.0866156	0.0795751	0.211374	0.182018	0.111058	0.15793	0.301423	0.310317
YDL082W	RPL13A	361	0.198671	0.0860148	0.244746	0.254024	0.0691925	0.139164	0.13048	0.0689124	0.139406	0.184917	0.0967911	0.0300336	0.108389	0.307219	0.307047	0.178716	0.223261	0.386809	0.657959
YML126C	ERG13	362	0.17579	0.0943199	0.221205	0.242239	0.0329709	0.0652565	0.00976688	0.148369	0.161163	0.279483	0.13293	0.205577	0.155588	0.375538	0.360805	0.365362	0.27568	0.460938	0.647488
YDR046C	BAP3	363	0.084906	0.158318	0.171562	0.214048	0.0742679	0.0509487	0.126064	0.0492328	0.103111	0.00535634	0.0628462	0.0994465	0.0580164	0.0251282	0.102806	0.0769506	0.0872214	0.185581	0.155715
YPL154C	PEP4	364	0.069055	0.0868674	0.141324	0.212675	0.142766	0.184868	0.122822	0.225618	0.123974	0.250097	0.161279	0.155196	0.171197	0.0856325	0.0967068	0.0441917	0.187445	0.00553761	0.138591
YPR041W	TIF5	365	0.190229	0.090668	0.157884	0.18509	0.0504394	0.0569572	0.151118	0.1294	0.178665	0.171548	0.0913998	0.0977733	0.205394	0.267325	0.326822	0.274754	0.102328	0.337112	0.465691
YOR293W	RPS10A	366	0.0499951	0.157168	0.240935	0.178652	0.0571714	0.120579	0.178132	0.147082	0.109397	0.142697	0.0961956	0.0332695	0.190605	0.468943	0.412372	0.380135	0.439836	0.538334	0.790359
YDR060W	MAK21	367	0.180868	0.0676708	0.275852	0.258668	0.140754	0.108742	0.257268	0.215569	0.11736	0.0809316	0.155061	0.111116	0.112518	0.35015	0.557485	0.428522	0.48285	0.372586	0.645872
YGR162W	TIF4631	368	0.171104	0.0995216	0.22458	0.182453	0.0927138	0.0811487	0.190657	0.213992	0.107492	0.118556	0.116047	0.127886	0.072819	0.269692	0.317739	0.335651	0.225495	0.277833	0.537566
YPL160W	CDC60	369	0.129412	0.0504349	0.125872	0.143218	0.0228843	0.0713832	0.149855	0.24556	0.0609193	0.111588	0.119146	0.150697	0.0772885	0.261319	0.271284	0.29212	0.308399	0.278932	0.484252
YDR003W-A	YDR003W-A	370	0.10158	0.329025	0.0495006	0.225243	0.178816	0.0261851	0.0181434	0.0471907	0.124883	0.400692	0.21227	0.269078	0.385253	0.0477606	0.372217	0.23399	0.237574	0.212291	0.221302
YMR142C	RPL13B	371	0.152176	0.115972	0.183895	0.250113	0.0516303	0.104623	0.134605	0.00935582	0.15511	0.0854799	0.100917	0.0625123	0.214585	0.32524	0.252691	0.246134	0.402616	0.382499	0.74433
YDR064W	RPS13	372	0.11765	0.178136	0.0620354	0.131035	0.0473368	0.0973902	0.0207026	0.08877	0.0726161	0.0377853	0.0438625	0.0737019	0.233476	0.445705	0.237365	0.506497	0.459376	0.522426	0.703505
YOR151C	RPB2	373	0.166484	0.0802885	0.128606	0.181778	0.0566279	0.0418544	0.0418137	0.198171	0.059111	0.146268	0.13567	0.133055	0.177767	0.215242	0.301931	0.333876	0.275038	0.25057	0.408056
YPL093W	NOG1	374	0.137987	0.170149	0.236561	0.209441	0.126844	0.0918731	0.191309	0.0753769	0.110953	0.0774007	0.154915	0.127597	0.149753	0.433531	0.630267	0.426209	0.502867	0.428472	0.715436
YKL009W	MRT4	375	0.217435	0.198638	0.209722	0.192664	0.0227833	0.0999137	0.139005	0.0195354	0.128432	0.00399726	0.0579099	0.0361929	0.263969	0.484159	0.749664	0.43531	0.536088	0.542253	0.749059
YMR177W	MMT1	376	0.153083	0.111554	0.282773	0.417846	0.0671285	0.00407876	0.133446	0.105927	0.0472955	0.0882111	0.140146	0.144974	0.126765	0.0850853	0.146407	0.292465	0.265146	0.32591	0.449627
YGR037C	ACB1	377	0.271567	0.187578	0.0958885	0.191325	0.0528798	0.122899	0.142254	0.251553	0.212987	0.106164	0.0907269	0.0899802	0.205822	0.422341	0.477604	0.278915	0.232622	0.221317	0.354741
YCL037C	SRO9	378	0.2341	0.0404764	0.241547	0.282761	0.188758	0.0264982	0.273018	0.092627	0.247798	0.254605	0.183483	0.167125	0.0920931	0.364396	0.214285	0.237119	0.0891542	0.272128	0.407998
YLR009W	RLP24	379	0.193546	0.0300635	0.316039	0.283785	0.077788	0.101669	0.265014	0.245893	0.264802	0.00689616	0.0597199	0.0917628	0.207316	0.455434	0.569526	0.322289	0.594428	0.50169	0.645224
YGR285C	ZUO1	380	0.156531	0.0703272	0.223569	0.205828	0.0438389	0.041779	0.146125	0.156823	0.176812	0.152731	0.0667201	0.12565	0.0731978	0.316657	0.162908	0.222502	0.0675513	0.326977	0.431497
YKL122C	SRP21	381	0.267818	0.195398	0.37764	0.361628	0.0970423	0.102573	0.158551	0.122662	0.212872	0.0926524	0.150904	0.0382757	0.204018	0.361577	0.478918	0.249631	0.257267	0.344414	0.605859
YOR341W	RPA190	382	0.169541	0.0901711	0.200369	0.199317	0.0703311	0.114908	0.152636	0.147288	0.0828306	0.149848	0.170328	0.114541	0.0977413	0.384108	0.577984	0.448189	0.508088	0.392787	0.682774
YOL058W	ARG1	383	0.067627	0.0671471	0.0651918	0.0549526	0.0950033	0.22691	0.0879281	0.0216628	0.0620864	0.121586	0.0636859	0.122488	0.0170801	0.31088	0.372288	0.587681	0.570059	0.663914	0.450784
YFR032C-A	RPL29	384	0.150467	0.216738	0.141139	0.224907	0.0755695	0.0472376	0.010156	0.0708575	0.141751	0.201458	0.190103	0.182896	0.291247	0.0562175	0.206364	0.318309	0.17785	0.336267	0.802085
YCR031C	RPS14A	385	0.133564	0.137534	0.19687	0.281576	0.0196653	0.0557235	0.0510618	0.162076	0.145839	0.297225	0.0766217	0.0593428	0.0865418	0.35408	0.226127	0.364112	0.364887	0.396626	0.703854
YIL069C	RPS24B	386	0.206239	0.207301	0.281425	0.275603	0.028084	0.0967473	0.0832313	0.192867	0.155768	0.151868	0.049888	0.0858248	0.17803	0.326831	0.466196	0.38661	0.316306	0.517127	0.631229
YNL016W	PUB1	387	0.201046	0.0842055	0.241587	0.178136	0.0945854	0.0311821	0.106845	0.119574	0.17525	0.182601	0.17059	0.0617207	0.064937	0.221073	0.25011	0.147213	0.117461	0.228571	0.401824
YDR172W	SUP35	388	0.161468	0.0810092	0.229644	0.22157	0.0780061	0.0314148	0.222455	0.0996686	0.127278	0.185737	0.152835	0.135467	0.135271	0.265589	0.359624	0.264539	0.140827	0.26885	0.464255
YKL196C	YKT6	389	0.113932	0.117688	0.21793	0.117378	0.0661536	0.107389	0.0406067	0.332962	0.151301	0.152426	0.0880803	0.125064	0.28485	0.274032	0.505366	0.486673	0.541307	0.416185	0.69371
YNL154C	YCK2	390	0.195111	0.0488982	0.231031	0.276465	0.086176	0.0200863	0.0837917	0.0896952	0.107729	0.120416	0.108372	0.158325	0.108915	0.174217	0.297298	0.284604	0.268014	0.170073	0.39713
YMR242C	RPL20A	391	0.117826	0.0964181	0.249641	0.249842	0.0668354	0.110072	0.229092	0.170634	0.151859	0.149578	0.08928	0.0545217	0.125249	0.296527	0.217322	0.24158	0.249728	0.39146	0.528645
YJR088C	EMC2	392	0.163794	0.146525	0.261273	0.254238	0.0366205	0.106667	0.154944	0.34953	0.152034	0.203789	0.167189	0.134432	0.29573	0.285116	0.322709	0.442391	0.287754	0.342835	0.520796
YKL001C	MET14	393	0.271723	0.11736	0.413562	0.309456	0.0490063	0.15023	0.573738	0.780678	0.149093	0.10003	0.177101	0.144257	0.0806066	0.23223	0.132594	0.376121	0.327556	0.348262	0.353355
YGR253C	PUP2	394	0.285392	0.183222	0.186949	0.253366	0.0682594	0.157036	0.0048831	0.189799	0.0872372	0.0481893	0.0609504	0.0940195	0.316604	0.270939	0.381973	0.349046	0.320655	0.414459	0.514421
YOR254C	SEC63	395	0.1419	0.119536	0.129584	0.210987	0.0308511	0.0130348	0.0721608	0.181164	0.090482	0.178866	0.115688	0.181413	0.122907	0.242635	0.443204	0.377932	0.360906	0.346552	0.503305
YBR106W	PHO88	396	0.198837	0.129947	0.164552	0.326534	0.111522	0.108932	0.191286	0.104272	0.317976	0.274395	0.0769119	0.0915427	0.0362157	0.396783	0.506542	0.33448	0.305322	0.590183	0.590426
YDL097C	RPN6	397	0.239944	0.107409	0.232917	0.23256	0.0326295	0.125867	0.0080178	0.247618	0.078448	0.247822	0.162953	0.144702	0.217355	0.205306	0.223509	0.288461	0.30705	0.215512	0.358671
YLR040C	AFB1	398	0.232458	0.0806013	0.14699	0.33187	0.0369322	0.148752	0.10774	0.0411959	0.160069	0.298187	0.0205481	0.193242	0.429638	0.280986	0.22826	0.0440842	0.291412	0.318112	0.277558
YBR283C	SSH1	399	0.146577	0.0742502	0.110277	0.170734	0.0768378	0.0315214	0.0178393	0.167168	0.106803	0.199815	0.12039	0.247863	0.163485	0.2327	0.368925	0.323548	0.310053	0.348369	0.520205
YGR218W	CRM1	400	0.182041	0.0331956	0.154975	0.22947	0.0389826	0.0568864	0.0496854	0.226638	0.0414155	0.191641	0.167944	0.210919	0.137921	0.135585	0.249209	0.318432	0.249654	0.204595	0.438103
YNL260C	LTO1	401	0.170425	0.172606	0.207474	0.317401	0.0517986	0.0452585	0.207702	0.105043	0.0428237	0.0711164	0.0558687	0.0267912	0.25353	0.234848	0.212409	0.331375	0.427155	0.384762	0.262589
YMR072W	ABF2	402	0.207178	0.106646	0.248297	0.236696	0.041359	0.0979278	0.0529575	0.190001	0.0636887	0.244996	0.142123	0.0978471	0.185364	0.273684	0.290337	0.294869	0.375394	0.40702	0.540159
YKL013C	ARC19	403	0.1469	0.158222	0.202142	0.257107	0.0345883	0.0900998	0.0325765	0.223485	0.0800978	0.262075	0.0790856	0.240352	0.138345	0.326987	0.278287	0.274263	0.439879	0.365124	0.323079
YGL206C	CHC1	404	0.172416	0.0116273	0.117596	0.194738	0.0688292	0.0765829	0.0568745	0.215499	0.130587	0.248701	0.182491	0.168947	0.128776	0.140704	0.138586	0.241008	0.102877	0.0763965	0.316801
YOR232W	MGE1	405	0.185784	0.178938	0.196746	0.182921	0.0986367	0.0591319	0.128126	0.305885	0.0897148	0.121706	0.0797668	0.0255817	0.195418	0.29355	0.416947	0.383006	0.449389	0.415077	0.567115
YBL027W	RPL19B	406	0.182986	0.19591	0.195638	0.223312	0.0787668	0.00310959	0.0972206	0.144623	0.0737931	0.0323662	0.0601041	0.0246118	0.227089	0.362959	0.165298	0.304414	0.307799	0.441408	0.657486
YPL243W	SRP68	407	0.17408	0.12319	0.230287	0.254113	0.0455051	0.011	0.00755035	0.180934	0.0346421	0.0878879	0.158471	0.103742	0.235086	0.242199	0.380726	0.367051	0.444293	0.272984	0.48751
YER055C	HIS1	408	0.132748	0.191	0.0763334	0.170205	0.0656516	0.138898	0.013527	0.0706434	0.0484653	0.196465	0.0716102	0.115042	0.144478	0.183694	0.042263	0.0187456	0.135779	0.134934	0.179172
YKR094C	RPL40B	409	0.105742	0.0392267	0.236858	0.332123	0.023314	0.156075	0.168366	0.0523046	0.13009	0.0386009	0.182693	0.0578913	0.169925	0.345192	0.297414	0.418076	0.288213	0.487031	0.712257
YER072W	VTC1	410	0.235874	0.105272	0.204406	0.174766	0.035399	0.0712797	0.230318	0.26907	0.188936	0.117323	0.0645468	0.0518013	0.293779	0.637186	0.756465	0.641354	0.826948	0.736012	1.01479
YMR039C	SUB1	411	0.230442	0.151803	0.223791	0.283454	0.143939	0.0401319	0.182584	0.0254757	0.201324	0.0347323	0.197628	0.160192	0.235035	0.136585	0.316035	0.203415	0.0246232	0.226638	0.582887
YNR016C	ACC1	412	0.123044	0.0148482	0.133548	0.138511	0.0725062	0.0870478	0.117254	0.430046	0.0815389	0.16887	0.156888	0.112104	0.262091	0.204176	0.282458	0.224734	0.135583	0.197277	0.45435
YDL070W	BDF2	413	0.203223	0.12628	0.154201	0.277697	0.0360471	0.0770188	0.039823	0.251229	0.236939	0.194919	0.205549	0.085262	0.260938	0.185857	0.168348	0.262074	0.184852	0.11613	0.336631
YOR206W	NOC2	414	0.255541	0.0874752	0.272577	0.209582	0.102045	0.137826	0.247279	0.26907	0.166295	0.179742	0.121368	0.132846	0.0791659	0.357589	0.6381	0.394729	0.471767	0.362419	0.583599
YBR127C	VMA2	415	0.105345	0.112017	0.109235	0.168538	0.0796379	0.0721152	0.0643969	0.102961	0.107721	0.209173	0.0669406	0.151921	0.0844868	0.149591	0.0117851	0.204635	0.0697387	0.161092	0.340378
YFR004W	RPN11	416	0.0871704	0.085853	0.23722	0.206875	0.0737045	0.058512	0.0356663	0.0354913	0.192942	0.0807409	0.0692744	0.119176	0.278465	0.254269	0.24155	0.311126	0.286911	0.258538	0.434681
YGL037C	PNC1	417	0.285894	0.0967856	0.247767	0.466356	0.200721	0.168886	0.113421	0.0199266	0.0866121	0.22125	0.309092	0.443113	0.230229	0.216574	0.314687	0.160829	0.495548	0.153488	0.306181
YLR347C	KAP95	418	0.161403	0.11591	0.0882136	0.175612	0.050887	0.0607776	0.0304858	0.236207	0.0831743	0.188336	0.197633	0.17358	0.177376	0.204547	0.321739	0.298551	0.256989	0.239613	0.571986
YJL127C-B	YJL127C-B	419	0.0288959	0.172414	0.166224	0.255978	0.144343	0.0940725	0.16796	0.0293016	0.208915	0.388696	0.219508	0.0868333	0.0810136	0.30145	0.53671	0.500697	0.53028	0.46557	0.21774
YFL045C	SEC53	420	0.12083	0.0980771	0.0702213	0.0957689	0.192533	0.110585	0.0947921	0.181343	0.0809943	0.176495	0.087984	0.155268	0.211819	0.295972	0.333134	0.383989	0.254759	0.504651	0.538253
YPR110C	RPC40	421	0.104574	0.0905072	0.199012	0.208041	0.0658703	0.0496801	0.0900078	0.0634217	0.202029	0.0792863	0.10952	0.0547661	0.142527	0.388532	0.59425	0.499821	0.498594	0.417574	0.668903
YDL160C	DHH1	422	0.169835	0.0176067	0.105316	0.229209	0.0485626	0.0700966	0.00903329	0.263113	0.0872612	0.20781	0.172581	0.251552	0.10591	0.132002	0.177942	0.203503	0.171173	0.108274	0.416035
YIL133C	RPL16A	423	0.160094	0.0543645	0.134419	0.162286	0.0273299	0.0774546	0.120937	0.115933	0.111773	0.15751	0.0127856	0.0539466	0.222758	0.328437	0.355438	0.456405	0.399779	0.348205	0.694045
YML073C	RPL6A	424	0.207135	0.120471	0.241299	0.254306	0.0264623	0.0697016	0.170649	0.0526866	0.0592768	0.092032	0.0936369	0.0694533	0.24622	0.241372	0.123182	0.337096	0.210545	0.310184	0.626636
YER122C	GLO3	425	0.228463	0.0602906	0.231704	0.285594	0.109242	0.0312836	0.0158918	0.140854	0.0775936	0.116221	0.120381	0.164748	0.138643	0.15268	0.255672	0.234146	0.225194	0.178967	0.339831
YDR496C	PUF6	426	0.192566	0.148216	0.269169	0.220833	0.0933286	0.12807	0.300097	0.078992	0.172378	0.0546183	0.242124	0.158648	0.0596196	0.425039	0.63533	0.441769	0.494809	0.410612	0.680019
YNL087W	TCB2	427	0.130561	0.100554	0.177811	0.252648	0.0508151	0.022711	0.310611	0.0276923	0.0888394	0.0640727	0.153879	0.127899	0.0350802	0.363698	0.448352	0.483941	0.563924	0.447489	0.566772
YLR060W	FRS1	428	0.148071	0.127339	0.157833	0.166921	0.0546168	0.068086	0.0542646	0.160948	0.0867454	0.136144	0.154502	0.0928843	0.169846	0.251811	0.192856	0.292761	0.20733	0.286506	0.429228
YKL039W	PTM1	429	0.107656	0.0556484	0.144543	0.193778	0.0607749	0.100873	0.0344468	0.183647	0.119958	0.188197	0.13409	0.260853	0.103115	0.0767255	0.0517756	0.299861	0.26514	0.231134	0.335331
YHR052W	CIC1	430	0.124372	0.0687296	0.288442	0.223543	0.0827627	0.113703	0.174242	0.264899	0.174688	0.101058	0.196851	0.143382	0.105509	0.433181	0.696635	0.556336	0.513971	0.526746	0.707549
YCR053W	THR4	431	0.142253	0.0691693	0.132645	0.169055	0.0181937	0.103742	0.252131	0.0296895	0.114369	0.0806753	0.163719	0.0565524	0.126604	0.178321	0.00851933	0.10866	0.12098	0.221815	0.319154
YMR002W	MIX17	432	0.225688	0.101222	0.206394	0.354901	0.0523819	0.0464545	0.0217677	0.0207617	0.192503	0.288887	0.110232	0.0975748	0.403434	0.42545	0.253127	0.330947	0.0690035	0.411825	0.359121
YER070W	RNR1	433	0.120188	0.0853561	0.117204	0.129491	0.0135021	0.116456	0.0632242	0.286012	0.0980047	0.171902	0.174104	0.131275	0.397737	0.334703	0.391882	0.268574	0.179744	0.348001	0.468427
YPL220W	RPL1A	434	0.172355	0.235299	0.173331	0.200121	0.100959	0.0979535	0.106583	0.173148	0.242358	0.189249	0.105945	0.221095	0.115629	0.404238	0.365006	0.469041	0.379322	0.485452	0.734153
YGL207W	SPT16	435	0.147264	0.0711871	0.188658	0.199982	0.0442351	0.0613111	0.0728182	0.240213	0.10058	0.143202	0.172708	0.161915	0.171844	0.159274	0.146225	0.30426	0.180409	0.138793	0.418815
YER073W	ALD5	436	0.168562	0.153044	0.107244	0.262082	0.0449962	0.203105	0.184735	0.00701855	0.00826771	0.0326846	0.0726089	0.0791373	0.0789831	0.268296	0.262028	0.169813	0.143167	0.122276	0.237121
YOR335C	ALA1	437	0.15138	0.0914571	0.107851	0.162256	0.0388725	0.110815	0.0392329	0.135991	0.0861502	0.168593	0.177556	0.203191	0.0558484	0.232997	0.279752	0.354906	0.251371	0.255674	0.538155
YFL031W	HAC1	438	0.145491	0.090784	0.139528	0.120749	0.0406907	0.086973	0.00736091	0.0851735	0.0798981	0.121277	0.101343	0.106075	0.0543434	0.0123812	0.285863	0.117778	0.128663	0.127693	0.0571544
YCR009C	RVS161	439	0.244973	0.100631	0.193586	0.238895	0.0706929	0.0772758	0.0215705	0.212418	0.0293632	0.240905	0.0468128	0.076074	0.275393	0.15069	0.190828	0.29287	0.296719	0.222611	0.213149
YLL050C	COF1	440	0.0878583	0.128572	0.0663144	0.316968	0.143889	0.0122135	0.00670974	0.22483	0.113096	0.216576	0.070995	0.0818034	0.412474	0.179108	0.153824	0.222081	0.384793	0.418202	0.593074
YBL056W	PTC3	441	0.101205	0.0997562	0.135389	0.214624	0.0482221	0.0101818	0.00863379	0.255625	0.120847	0.236572	0.149049	0.283328	0.283908	0.211374	0.305313	0.345448	0.134242	0.226582	0.490521
YNL190W	YNL190W	442	0.202626	0.0506198	0.0676883	0.134701	0.019386	0.157237	0.0120421	0.145269	0.120476	0.271456	0.177596	0.277706	0.101969	0.277278	0.153246	0.186732	0.24454	0.203364	0.340546
YNL229C	URE2	443	0.234645	0.128053	0.207163	0.197199	0.10342	0.0380182	0.0810767	0.26907	0.0729354	0.0748899	0.151441	0.144169	0.17764	0.233756	0.300693	0.302648	0.332421	0.164376	0.504303
YPR187W	RPO26	444	0.0488498	0.0723187	0.216534	0.191318	0.0537776	0.0626158	0.0748017	0.117348	0.166036	0.0616775	0.0370368	0.0753501	0.204697	0.154826	0.496053	0.402583	0.465728	0.432451	0.691423
YLR448W	RPL6B	445	0.160038	0.0377587	0.241588	0.269193	0.0590074	0.089534	0.274175	0.0277837	0.0581283	0.068769	0.128749	0.121141	0.209472	0.322494	0.238766	0.279192	0.185889	0.439376	0.612076
YIL051C	MMF1	446	0.14604	0.382527	0.122999	0.330108	0.118914	0.109074	0.275571	0.466604	0.313628	0.138295	0.0975141	0.00646968	0.101477	0.416399	0.298139	0.417328	0.192121	0.347507	0.622515
YJR105W	ADO1	447	0.150669	0.127094	0.124824	0.133809	0.138635	0.126875	0.101498	0.314218	0.186951	0.183874	0.151018	0.106467	0.330955	0.181544	0.0254366	0.0428889	0.208895	0.205123	0.256279
YER133W	GLC7	448	0.144424	0.112414	0.0758607	0.150038	0.103426	0.0589156	0.0794752	0.201543	0.0685105	0.056047	0.1964	0.132924	0.252302	0.22975	0.253435	0.393427	0.352559	0.329504	0.355318
YGL103W	RPL28	449	0.120327	0.151463	0.0444942	0.0599601	0.037716	0.0451656	0.00393548	0.226117	0.0155636	0.0478782	0.0933841	0.144366	0.117901	0.413382	0.439518	0.488968	0.382761	0.456215	0.723777
YNL308C	KRI1	450	0.239431	0.13372	0.268204	0.211728	0.199556	0.116975	0.274613	0.146404	0.164619	0.0332587	0.138824	0.159427	0.0878599	0.357852	0.535538	0.401967	0.509769	0.404368	0.515116
YLR061W	RPL22A	451	0.144011	0.115933	0.141368	0.225475	0.0528061	0.0739343	0.0782086	0.275177	0.111225	0.0955603	0.0936272	0.030459	0.0894275	0.348207	0.368495	0.457971	0.404555	0.490762	0.726441
YNL153C	GIM3	452	0.222	0.141355	0.235065	0.224075	0.0325091	0.0819491	0.174216	0.365881	0.0851943	0.0215669	0.139231	0.0248256	0.0561306	0.369165	0.354677	0.442917	0.612825	0.492806	0.692759
YMR308C	PSE1	453	0.113943	0.0883642	0.123418	0.178677	0.0413518	0.0299294	0.0602466	0.194428	0.130492	0.151749	0.168149	0.163747	0.163597	0.294999	0.365946	0.363717	0.328184	0.329917	0.493401
YPL210C	SRP72	454	0.134523	0.0938701	0.211916	0.217058	0.0317628	0.0209818	0.0501672	0.132524	0.0781927	0.116242	0.140116	0.120392	0.176565	0.303877	0.444042	0.376788	0.298088	0.288271	0.575573
YDR429C	TIF35	455	0.233862	0.110195	0.231719	0.289785	0.138562	0.0248228	0.112566	0.0503854	0.22784	0.143853	0.113865	0.0953593	0.230357	0.331682	0.296683	0.463781	0.329331	0.364487	0.441061
YDR447C	RPS17B	456	0.119952	0.228146	0.1737	0.227422	0.0134129	0.103597	0.268605	0.101157	0.16556	0.000599616	0.152352	0.0574668	0.0819461	0.527115	0.538336	0.624441	0.612107	0.568677	0.89507
YOR361C	PRT1	457	0.155914	0.072642	0.152017	0.175368	0.0405919	0.0917781	0.0547151	0.18245	0.116206	0.0936687	0.167327	0.0953915	0.152599	0.285429	0.293569	0.335923	0.307386	0.350506	0.497642
YNL110C	NOP15	458	0.156386	0.147978	0.339974	0.224966	0.152527	0.12728	0.372652	0.217122	0.241753	0.12619	0.139579	0.122806	0.242611	0.456109	0.89885	0.511589	0.505958	0.461229	0.720748
YDR341C	YDR341C	459	0.134927	0.0900585	0.0874936	0.134699	0.048562	0.107742	0.115623	0.0490276	0.0540486	0.144641	0.0816889	0.141112	0.104617	0.246119	0.225676	0.339195	0.212903	0.244033	0.301751
YGR279C	SCW4	460	0.0699068	0.101873	0.120757	0.156638	0.0674244	0.0983371	0.0356486	0.214131	0.0993453	0.231555	0.169111	0.162105	0.2331	0.264554	0.131536	0.106476	0.0278102	0.225725	0.309155
YKL117W	SBA1	461	0.118353	0.202782	0.237699	0.323603	0.0733161	0.0374763	0.0334755	0.0792371	0.134903	0.184267	0.0831082	0.076637	0.215903	0.157979	0.12575	0.127301	0.0242537	0.222558	0.3551
YHR064C	SSZ1	462	0.138566	0.118673	0.181161	0.204606	0.0273304	0.0708277	0.108519	0.140288	0.172299	0.224182	0.131288	0.126787	0.0971402	0.292313	0.334161	0.310874	0.173334	0.331241	0.514963
YOR355W	GDS1	463	0.19172	0.0754131	0.128768	0.191154	0.0178766	0.0438804	0.0991792	0.274915	0.0408179	0.204008	0.134169	0.0677424	0.18958	0.255549	0.2643	0.256518	0.145794	0.177644	0.546862
YBR121C	GRS1	464	0.162469	0.127926	0.100201	0.139184	0.0346421	0.0581431	0.0477163	0.127417	0.0866847	0.199797	0.128504	0.150073	0.120796	0.274041	0.231216	0.343689	0.353071	0.283853	0.487578
YNL189W	SRP1	465	0.135733	0.0894986	0.117612	0.244223	0.0712561	0.0518192	0.00128006	0.162665	0.0589958	0.153949	0.115954	0.106667	0.193189	0.287434	0.432033	0.334555	0.266621	0.299749	0.472008
YDR368W	YPR1	466	0.219777	0.0524723	0.0296581	0.167305	0.104424	0.0986059	0.0124601	0.0139695	0.192406	0.130333	0.0833715	0.0592319	0.112643	0.328179	0.381973	0.378103	0.262414	0.286099	0.441906
YNL241C	ZWF1	467	0.125217	0.0525216	0.108803	0.369041	0.0202252	0.186894	0.145064	0.0612867	0.201589	0.078862	0.0368929	0.0625113	0.0966386	0.023741	0.221842	0.00261998	0.0636979	0.177404	0.0577983
YOL121C	RPS19A	468	0.193709	0.191453	0.159475	0.212414	0.0962963	0.0759239	0.0517876	0.0580675	0.177413	0.113244	0.0362625	0.0579467	0.229891	0.356503	0.34127	0.380788	0.374064	0.43425	0.746338
YKL103C	APE1	469	0.141556	0.169563	0.156536	0.256756	0.0798396	0.0692422	0.0192952	0.195888	0.196076	0.241983	0.154922	0.179099	0.250923	0.068627	0.422054	0.0292087	0.226091	0.194051	0.330236
YLR287C-A	RPS30A	470	0.179367	0.104591	0.291734	0.171825	0.0487227	0.0857516	0.098369	0.0807635	0.130008	0.0172692	0.0725077	0.0509144	0.215234	0.382029	0.429059	0.468743	0.365646	0.461545	0.681184
YNL096C	RPS7B	471	0.223502	0.130487	0.237245	0.285017	0.00970174	0.0481039	0.0928081	0.172216	0.0636021	0.171964	0.084642	0.0466198	0.118077	0.239718	0.251952	0.206837	0.198898	0.315554	0.498151
YHL034C	SBP1	472	0.212309	0.045965	0.180979	0.13147	0.0620325	0.0482031	0.0222063	0.0753533	0.114833	0.162305	0.0525464	0.159958	0.202015	0.129726	0.0810048	0.129894	0.0041331	0.189941	0.197972
YLR455W	PDP3	473	0.15309	0.100355	0.267437	0.289607	0.0919791	0.0217726	0.0901594	0.284847	0.126765	0.176837	0.178165	0.176724	0.208044	0.190733	0.3354	0.354878	0.253082	0.333608	0.411163
YNL070W	TOM7	474	0.093557	0.298354	0.230959	0.108735	0.170363	0.0432916	0.494034	0.0924861	0.185902	0.291327	0.0737986	0.221274	0.189404	0.393035	0.447752	0.187591	0.438677	0.52679	0.598291
YIL148W	RPL40A	475	0.092583	0.192243	0.183457	0.219793	0.034544	0.0443029	0.0576304	0.0426185	0.0684976	0.0213981	0.0987595	0.0581823	0.340886	0.262126	0.312487	0.35703	0.35623	0.492858	0.70561
YER009W	NTF2	476	0.21288	0.126887	0.191598	0.275281	0.211475	0.12593	0.0336988	0.0307857	0.0513496	0.262075	0.127122	0.0632544	0.182011	0.447917	0.418005	0.435971	0.33362	0.547732	0.820797
YJR122W	IBA57	477	0.0841809	0.0702443	0.0895262	0.174183	0.0246613	0.0438511	0.0230184	0.173643	0.0797007	0.0514956	0.0987756	0.0734673	0.099496	0.212516	0.288233	0.237784	0.307997	0.232161	0.338498
YHR183W	GND1	478	0.10636	0.0451561	0.0895768	0.122918	0.062605	0.0792726	0.0460734	0.107852	0.117093	0.106399	0.137042	0.108812	0.332072	0.0208878	0.0534659	0.100345	0.108846	0.226219	0.354176
YNL104C	LEU4	479	0.13205	0.0871082	0.0913294	0.107877	0.0613317	0.102081	0.0721647	0.0360033	0.167213	0.0457575	0.110761	0.140138	0.0586125	0.1439	0.108249	0.00362682	0.157987	0.0180521	0.0328932
YGR094W	VAS1	480	0.153145	0.0556034	0.116645	0.18136	0.00827681	0.0814229	0.113336	0.175256	0.0724196	0.149127	0.171413	0.134554	0.109772	0.265462	0.203816	0.29985	0.200167	0.189381	0.394228
YDR158W	HOM2	481	0.142886	0.0626982	0.0703448	0.148255	0.0319529	0.0902927	0.0281669	0.0328597	0.105028	0.134911	0.101738	0.139167	0.027583	0.0230748	0.00642642	0.0425214	0.135417	0.00174679	0.0976848
YPL260W	YPL260W	482	0.138589	0.0963727	0.192875	0.209188	0.0307713	0.0152683	0.0247014	0.263326	0.0724574	0.219054	0.134096	0.190491	0.145837	0.116154	0.199929	0.20142	0.1705	0.162946	0.315182
YAL025C	MAK16	483	0.223225	0.167302	0.328719	0.246141	0.167429	0.0818051	0.326509	0.0625271	0.212371	0.000299422	0.0937175	0.0716053	0.272025	0.349036	0.68437	0.316078	0.400404	0.363684	0.493354
YDR238C	SEC26	484	0.153073	0.0488793	0.125296	0.202073	0.0541127	0.0394322	0.053358	0.207547	0.0384948	0.228594	0.197064	0.209391	0.156403	0.154794	0.217701	0.284342	0.239681	0.217273	0.409121
YPR024W	YME1	485	0.136815	0.0611644	0.143013	0.248401	0.0316241	0.0268847	0.150032	0.165124	0.120635	0.195818	0.0634421	0.250023	0.0929714	0.144288	0.182556	0.324275	0.0845122	0.244269	0.352246
YPR181C	SEC23	486	0.159931	0.0684204	0.0991526	0.213491	0.0596341	0.107257	0.012628	0.144556	0.190777	0.213793	0.107949	0.205471	0.11537	0.144615	0.153933	0.192033	0.106178	0.191852	0.381579
YNL118C	DCP2	487	0.14959	0.0588243	0.173607	0.206773	0.0870174	0.0459894	0.113453	0.227468	0.048397	0.130732	0.173843	0.114775	0.172137	0.167167	0.131479	0.180535	0.210215	0.159693	0.327136
YKR008W	RSC4	488	0.182289	0.0189057	0.234706	0.225739	0.0792202	0.0518791	0.0341534	0.199827	0.126657	0.196096	0.176322	0.0426301	0.219616	0.179332	0.363141	0.318464	0.201764	0.176294	0.418482
YER090W	TRP2	489	0.144505	0.0928571	0.123865	0.244369	0.0114424	0.0888826	0.144802	0.15293	0.124688	0.130819	0.141771	0.165615	0.10305	0.114864	0.0264923	0.0796423	0.0384691	0.0710425	0.0595648
YOR117W	RPT5	490	0.181282	0.193805	0.189339	0.184309	0.0676328	0.0231526	0.0577248	0.0762972	0.109646	0.132083	0.058753	0.171837	0.314914	0.260491	0.230344	0.272141	0.187121	0.227063	0.404571
YGR034W	RPL26B	491	0.149502	0.175344	0.0446279	0.168119	0.0596211	0.123976	0.0179815	0.292294	0.140711	0.187218	0.195396	0.0538626	0.140533	0.482687	0.377052	0.422892	0.486177	0.450775	0.753899
YNL212W	VID27	492	0.112253	0.0617588	0.133379	0.234481	0.0178072	0.00326761	0.0525475	0.169481	0.0379665	0.20011	0.0611372	0.209044	0.165933	0.183744	0.137029	0.295413	0.148809	0.142214	0.369473
YMR229C	RRP5	493	0.188054	0.100236	0.199886	0.161181	0.0438117	0.0996241	0.187807	0.17448	0.0945781	0.102299	0.198675	0.0943995	0.110487	0.381782	0.552095	0.454091	0.452355	0.405737	0.656906
YAL016W	TPD3	494	0.102008	0.0900022	0.137988	0.181716	0.0169985	0.0399395	0.0970769	0.244009	0.0940538	0.252318	0.0958019	0.208961	0.199792	0.182993	0.291294	0.318667	0.254965	0.235772	0.363895
YMR161W	HLJ1	495	0.185601	0.1784	0.253645	0.273822	0.00294014	0.0407734	0.171731	0.196089	0.102458	0.259596	0.0580603	0.17784	0.0923818	0.305858	0.186882	0.294869	0.206972	0.338232	0.496732
YFR052W	RPN12	496	0.153143	0.0533084	0.30869	0.349398	0.133136	0.0185251	0.0180053	0.335384	0.0658663	0.178095	0.056477	0.0928443	0.107612	0.25181	0.403296	0.374483	0.196576	0.379924	0.506861
YNL066W	SUN4	497	0.139006	0.0483975	0.067631	0.0902619	0.0395745	0.117158	0.0802664	0.18737	0.17725	0.229479	0.112564	0.177951	0.168871	0.234013	0.109614	0.121359	0.0465621	0.184299	0.197639
YFL016C	MDJ1	498	0.233416	0.183257	0.286721	0.410905	0.0513861	0.0983871	0.187082	0.223187	0.116296	0.0243618	0.140928	0.219802	0.173932	0.116046	0.0941084	0.0961063	0.32212	0.159461	0.303337
YNL113W	RPC19	499	0.162129	0.0948304	0.324287	0.240047	0.145815	0.0663211	0.286461	0.112126	0.207091	0.0503813	0.178652	0.118606	0.0489149	0.441145	0.667297	0.36426	0.596355	0.517665	0.602647
YOR168W	GLN4	500	0.140923	0.108219	0.0978088	0.126781	0.00805607	0.0731922	0.0961097	0.247527	0.11827	0.0590802	0.101453	0.153425	0.0611383	0.285782	0.391192	0.36468	0.315674	0.287193	0.535603
YPL204W	HRR25	501	0.104733	0.132017	0.143989	0.163437	0.0489049	0.0393694	0.0602657	0.224541	0.225348	0.18802	0.100661	0.0630027	0.0855453	0.290044	0.312734	0.276327	0.273573	0.279133	0.513866
YGL190C	CDC55	502	0.138513	0.0364703	0.199441	0.256961	0.0339025	0.0379094	0.11309	0.144594	0.0995091	0.137456	0.138443	0.168806	0.168185	0.0654401	0.344522	0.232852	0.216531	0.175357	0.354139
YOR370C	MRS6	503	0.155754	0.0756476	0.119293	0.171841	0.0548342	0.073347	0.0889225	0.267557	0.0407448	0.125681	0.101895	0.0926072	0.17753	0.164068	0.188947	0.196064	0.105983	0.225727	0.415651
YDR151C	CTH1	504	0.215285	0.0598832	0.181796	0.380943	0.152625	0.0970436	0.0905534	0.000104454	0.12382	0.167335	0.206622	0.0753505	0.0792145	0.206565	0.332911	0.0919535	0.204049	0.230775	0.302621
YKR057W	RPS21A	505	0.121805	0.130924	0.237117	0.202816	0.0788145	0.0973431	0.0556172	0.110565	0.138454	0.0821214	0.101559	0.0217745	0.254948	0.410594	0.354549	0.335148	0.676286	0.631543	0.964035
YER087C-B	SBH1	506	0.305641	0.224677	0.130038	0.367967	0.0719152	0.108862	0.0241129	0.282028	0.120417	0.249862	0.0766834	0.197521	0.290486	0.157048	0.304009	0.294869	0.0090841	0.280633	0.507574
YDR035W	ARO3	507	0.0867519	0.115168	0.0619326	0.163595	0.109124	0.0822097	0.114341	0.323467	0.053177	0.0967794	0.00377594	0.0520487	0.0736799	0.0186236	0.220863	0.227983	0.395425	0.158022	0.122969
YOR267C	HRK1	508	0.240654	0.0598145	0.299786	0.370967	0.0954453	0.0406697	0.163992	0.0288942	0.0848277	0.202515	0.202142	0.312686	0.125004	0.0823162	0.00573395	0.213059	0.000294977	0.15456	0.257114
YLR413W	INA1	509	0.104722	0.150341	0.226888	0.280831	0.0618102	0.117265	0.152919	0.206039	0.0880295	0.15428	0.164396	0.270879	0.203012	0.395942	0.56332	0.332758	0.405507	0.457371	0.613069
YBL072C	RPS8A	510	0.159479	0.149979	0.237307	0.19252	0.0835257	0.092935	0.109302	0.0693895	0.192835	0.039622	0.159965	0.117386	0.232819	0.357605	0.313775	0.271133	0.370333	0.311507	0.713722
YEL065W	SIT1	511	0.166284	0.147482	0.137658	0.180592	0.0825192	0.199184	0.0550213	0.32703	0.215559	0.251435	0.2133	0.161347	0.32155	0.320677	0.519802	0.6425	0.729281	0.475461	0.611549
YBR154C	RPB5	512	0.156998	0.217957	0.199275	0.163754	0.0531418	0.0739693	0.283723	0.00300418	0.152115	0.175582	0.0956018	0.0306194	0.0785417	0.475979	0.643852	0.558304	0.532924	0.529423	0.581977
YGR116W	SPT6	513	0.206515	0.0366068	0.160257	0.194379	0.0253492	0.0448076	0.0703818	0.209168	0.149604	0.189585	0.186864	0.19532	0.181388	0.173324	0.217681	0.310553	0.255317	0.210869	0.389181
YOL136C	PFK27	514	0.152057	0.0351421	0.076826	0.187405	0.0815444	0.0765945	0.0354142	0.149091	0.0267067	0.301615	0.150814	0.154155	0.115227	0.322327	0.572464	0.442607	0.425661	0.476287	0.626952
YPL078C	ATP4	515	0.131782	0.165684	0.30306	0.305873	0.0316779	0.072838	0.0218119	0.253369	0.0203326	0.126694	0.141352	0.103284	0.188986	0.141722	0.150762	0.190027	0.0768262	0.328291	0.299241
YJL109C	UTP10	516	0.170361	0.0796847	0.187627	0.214109	0.0597749	0.103481	0.179906	0.140109	0.1519	0.194579	0.223551	0.0879077	0.0860229	0.409298	0.644173	0.486334	0.565915	0.46677	0.735717
YMR235C	RNA1	517	0.155169	0.0976646	0.240839	0.156612	0.0465466	0.150706	0.0028277	0.107474	0.0677444	0.218792	0.0628585	0.197218	0.119314	0.320486	0.269427	0.301922	0.310665	0.292556	0.492147
YDR091C	RLI1	518	0.172155	0.0970422	0.141562	0.185979	0.0904074	0.0589572	0.0676297	0.233564	0.109353	0.204981	0.156816	0.200429	0.119183	0.312002	0.376366	0.385414	0.406859	0.382546	0.566388
YBL099W	ATP1	519	0.0912906	0.0165473	0.07229	0.141689	0.121599	0.0884787	0.0811188	0.240596	0.058242	0.267857	0.0791452	0.182211	0.274167	0.00306488	0.177307	0.0394887	0.130918	0.0361162	0.0801543
YPR036W	VMA13	520	0.181648	0.109526	0.128111	0.213197	0.0623376	0.0991771	0.0410079	0.194336	0.172552	0.114948	0.132873	0.0279619	0.161407	0.215775	0.18582	0.10902	0.148314	0.171071	0.492911
YOL154W	ZPS1	521	0.877092	0.57237	1.04487	1.0956	0.233171	0.180951	1.02132	1.14538	0.437334	0.273334	0.277744	0.0960684	0.637164	0.0839497	0.127376	0.294869	0.0873024	0.072735	0.169069
YLR051C	FCF2	522	0.196678	0.160884	0.302293	0.162371	0.115553	0.0787382	0.219199	0.243063	0.0843362	0.0267783	0.119199	0.0438261	0.129091	0.419884	0.457449	0.492617	0.458926	0.491547	0.657804
YNL002C	RLP7	523	0.142331	0.0840757	0.177768	0.171771	0.123021	0.171027	0.118496	0.0805677	0.129479	0.0499594	0.077919	0.0299335	0.158935	0.404397	0.391022	0.342678	0.506591	0.458417	0.621784
YKR095W	MLP1	524	0.245762	0.119664	0.28797	0.253629	0.0916879	0.0706998	0.187148	0.237673	0.150461	0.142253	0.209198	0.0917987	0.152274	0.215164	0.262714	0.327357	0.284826	0.181184	0.400266
YBR034C	HMT1	525	0.0947307	0.130153	0.23374	0.233732	0.131524	0.140184	0.190244	0.105729	0.226059	0.248677	0.129356	0.0943323	0.0822779	0.474361	0.699946	0.54163	0.570416	0.570674	0.738546
YDL140C	RPO21	526	0.152301	0.104601	0.0653237	0.165272	0.0414954	0.0562265	0.0433805	0.180887	0.0983965	0.178247	0.144155	0.175301	0.100207	0.218618	0.185032	0.268118	0.21199	0.18936	0.425011
YDR394W	RPT3	527	0.183383	0.149557	0.147047	0.222186	0.0400565	0.0229094	0.0622825	0.264318	0.090437	0.143719	0.110431	0.0478913	0.0683665	0.242665	0.288189	0.244476	0.0901701	0.20437	0.289376
YPL117C	IDI1	528	0.0547376	0.175074	0.130242	0.201254	0.0209121	0.0439324	0.0720097	0.0246125	0.0384562	0.122932	0.122893	0.111573	0.285133	0.395756	0.353293	0.39349	0.259556	0.355861	0.609241
YGR135W	PRE9	529	0.122182	0.152847	0.124833	0.206916	0.11685	0.12644	0.00976688	0.0945416	0.123993	0.0960143	0.0236201	0.0561291	0.155225	0.352706	0.303442	0.346174	0.491604	0.349382	0.496889
YNL085W	MKT1	530	0.17833	0.0404352	0.15695	0.248947	0.0235013	0.0522676	0.103334	0.109984	0.138221	0.191051	0.152295	0.19663	0.132497	0.17251	0.307477	0.335631	0.249938	0.265874	0.474681
YLR064W	PER33	531	0.249985	0.0948494	0.155087	0.224848	0.0296412	0.0498518	0.0812274	0.0124594	0.0652463	0.210531	0.086466	0.221547	0.0418037	0.14407	0.391255	0.411155	0.330368	0.346843	0.441481
YML012W	ERV25	532	0.152379	0.125407	0.131557	0.183049	0.0441564	0.0744993	0.00788137	0.197153	0.17679	0.142193	0.0529291	0.187044	0.280858	0.131821	0.21531	0.299969	0.345275	0.297134	0.427089
YBL041W	PRE7	533	0.199846	0.0853846	0.17088	0.240255	0.0298895	0.126115	0.013688	0.0279763	0.147168	0.155159	0.064408	0.0219754	0.191279	0.257233	0.276727	0.113226	0.346179	0.367388	0.473144
YKL210W	UBA1	534	0.151194	0.0973673	0.112833	0.118744	0.0189835	0.0426228	0.0111751	0.161533	0.0928411	0.159236	0.128417	0.139649	0.24961	0.0557579	0.111612	0.200432	0.119534	0.0908698	0.26599
YGL011C	SCL1	535	0.184755	0.0972809	0.193566	0.269065	0.0183946	0.0980977	0.00258159	0.00526412	0.232824	0.163657	0.132906	0.0625997	0.194639	0.313416	0.267587	0.296884	0.401739	0.248921	0.295491
YDR471W	RPL27B	536	0.121873	0.0509536	0.208262	0.196762	0.0909259	0.0949765	0.104207	0.161371	0.167993	0.135798	0.060953	0.0513277	0.163045	0.335382	0.376005	0.265681	0.332148	0.423095	0.628681
YGR124W	ASN2	537	0.127506	0.0681038	0.0408749	0.135111	0.0723323	0.118475	0.0565874	0.101686	0.122603	0.138766	0.15892	0.0848528	0.0453771	0.136008	0.0206155	0.075532	0.0445818	0.0710788	0.22348
YOR332W	VMA4	538	0.226337	0.0647301	0.320057	0.267099	0.1993	0.0729865	0.11687	0.106587	0.126646	0.114447	0.0946742	0.0932329	0.105015	0.214537	0.0513031	0.276851	0.121441	0.248845	0.512005
YER002W	NOP16	539	0.224338	0.141067	0.278372	0.21823	0.193963	0.104982	0.179151	0.0976768	0.198259	0.0616775	0.0413589	0.0412395	0.156685	0.578478	0.598113	0.490271	0.493925	0.317871	0.475042
YJL189W	RPL39	540	0.0686952	0.238576	0.223803	0.273618	0.185153	0.140477	0.177057	0.0668646	0.366235	0.0560797	0.158677	0.151462	0.143645	0.503676	0.469133	0.466858	0.383049	0.542021	0.77969
YKL178C	STE3	541	0.298596	0.0825175	0.169585	0.18481	0.133521	0.0793545	0.0101986	0.100701	0.0978509	0.184611	0.173222	0.153707	0.284065	0.304915	0.434981	0.457263	0.560823	0.37755	0.51182
YFL004W	VTC2	542	0.185119	0.0508706	0.149498	0.212524	0.0843558	0.115994	0.00991418	0.250984	0.0991457	0.152062	0.093585	0.111326	0.212242	0.598355	0.730365	0.666797	0.605519	0.632192	0.789748
YDL145C	COP1	543	0.156353	0.0722222	0.105389	0.160283	0.0431752	0.0593455	0.0390594	0.172822	0.0589429	0.222541	0.133967	0.117424	0.161941	0.168514	0.128926	0.215123	0.215147	0.178566	0.363848
YGL195W	GCN1	544	0.164538	0.0442703	0.0723365	0.122488	0.0326138	0.0599891	0.0417754	0.157553	0.0968924	0.205101	0.183469	0.108784	0.110984	0.243955	0.269706	0.333153	0.297582	0.270559	0.5042
YJL052W	TDH1	545	0.144274	0.614184	0.611756	0.754238	0.151388	0.158943	0.521986	0.525741	0.0504441	0.281322	0.373324	0.147911	0.282978	0.093404	0.275491	0.15821	0.120141	0.191363	0.0499816
YMR143W	RPS16A	546	0.167785	0.0454441	0.130262	0.145877	0.0824207	0.129976	0.0384149	0.390176	0.104663	0.107147	0.0814053	0.0380663	0.211604	0.392625	0.35646	0.340249	0.443802	0.461976	0.625763
YML007W	YAP1	547	0.177054	0.0670266	0.15754	0.161707	0.0863882	0.0463933	0.0931648	0.154816	0.0453188	0.0897489	0.145801	0.141987	0.0499871	0.20849	0.155666	0.216167	0.171432	0.172666	0.290819
YDR077W	SED1	548	0.144447	0.187423	0.165096	0.232896	0.187636	0.275035	0.124888	0.0235387	0.289862	0.353097	0.190439	0.391952	0.207586	0.150732	0.320199	0.342074	0.339152	0.110296	0.232184
YMR079W	SEC14	549	0.189062	0.20651	0.226356	0.232905	0.0104184	0.0602666	0.019995	0.251687	0.103199	0.139312	0.114334	0.112323	0.134128	0.353496	0.452903	0.411589	0.353272	0.418437	0.4983
YDR270W	CCC2	550	0.0531908	0.0563691	0.106018	0.0902515	0.0207738	0.0391659	0.0529503	0.318717	0.166101	0.121105	0.133394	0.178717	0.310995	0.0102203	0.0674764	0.119921	0.0891456	0.121364	0.149906
YJR063W	RPA12	551	0.176883	0.17526	0.175363	0.310784	0.0515898	0.0771627	0.24255	0.324343	0.142192	0.0482363	0.090018	0.0695266	0.273838	0.446262	0.843989	0.299451	0.853802	0.609124	0.724486
YDR214W	AHA1	552	0.302167	0.201698	0.205301	0.345997	0.0448385	0.110237	0.0164292	0.232944	0.148246	0.162475	0.180806	0.0924288	0.0340207	0.105922	0.198048	0.227947	0.230593	0.266883	0.328008
YPR103W	PRE2	553	0.217408	0.133455	0.13811	0.25612	0.0805078	0.0924918	0.0559564	0.107563	0.185247	0.275804	0.0745974	0.18455	0.0786518	0.191132	0.234579	0.227039	0.344578	0.189642	0.449207
YDR365C	ESF1	554	0.136438	0.102171	0.305163	0.191611	0.133268	0.0867254	0.243879	0.144178	0.148814	0.0641407	0.133669	0.142695	0.0670728	0.381701	0.399182	0.419081	0.421157	0.372392	0.56964
YCL043C	PDI1	555	0.183905	0.105699	0.0787122	0.145929	0.038589	0.104114	0.0155128	0.0341996	0.275056	0.277227	0.11191	0.163563	0.152778	0.11219	0.10143	0.0634146	0.00562224	0.137308	0.311643
YOL120C	RPL18A	556	0.187551	0.198856	0.12503	0.262172	0.12085	0.181882	0.104897	0.0128411	0.127358	0.046073	0.0587031	0.0718853	0.180728	0.414662	0.295593	0.422092	0.304329	0.483132	0.653119
YGL173C	XRN1	557	0.165942	0.054315	0.105259	0.174186	0.0639614	0.0360757	0.00569447	0.219206	0.0595075	0.169777	0.117711	0.137249	0.17435	0.212508	0.258705	0.31778	0.320792	0.222483	0.406116
YGL122C	NAB2	558	0.20543	0.122732	0.265736	0.359549	0.047912	0.0382446	0.11807	0.120988	0.101762	0.166533	0.125259	0.174706	0.101611	0.252624	0.379455	0.32707	0.0876705	0.286111	0.468757
YDL235C	YPD1	559	0.226891	0.00879157	0.304506	0.273549	0.139854	0.101422	0.14158	0.0380749	0.167757	0.0256888	0.139459	0.0935268	0.462047	0.464217	0.500018	0.493323	0.380278	0.493465	0.836268
YDL075W	RPL31A	560	0.200188	0.207366	0.160834	0.207965	0.044196	0.0377269	0.0924414	0.280045	0.116932	0.134222	0.0578516	0.0623763	0.0826831	0.283743	0.260729	0.338645	0.244064	0.382288	0.695648
YLR276C	DBP9	561	0.146526	0.0900336	0.257712	0.192678	0.0802288	0.099793	0.246713	0.0373506	0.0828013	0.122104	0.159846	0.0788522	0.144995	0.398675	0.697205	0.440286	0.527305	0.385991	0.613126
YER012W	PRE1	562	0.249499	0.155612	0.175896	0.270092	0.0350011	0.0835004	0.129487	0.209786	0.232544	0.128824	0.0845418	0.0260413	0.280292	0.410878	0.409476	0.376645	0.507222	0.427597	0.384428
YPL212C	PUS1	563	0.151059	0.0664591	0.139478	0.152428	0.0777144	0.0523363	0.229188	0.0906016	0.0917325	0.0924558	0.0962583	0.101127	0.0140247	0.175056	0.377548	0.230486	0.198585	0.248035	0.336262
YKL184W	SPE1	564	0.124116	0.105204	0.0915788	0.211997	0.0545837	0.0745592	0.0454345	0.159556	0.077831	0.117446	0.053055	0.0886789	0.0965213	0.235567	0.368148	0.356707	0.396877	0.218187	0.522717
YMR230W	RPS10B	565	0.193957	0.124876	0.279391	0.159283	0.0684214	0.0949015	0.205851	0.26907	0.15902	0.0811943	0.099769	0.048584	0.177881	0.398932	0.308841	0.414712	0.334357	0.429313	0.734807
YDL029W	ARP2	566	0.106447	0.110634	0.21148	0.164575	0.110194	0.0881	0.0565262	0.202257	0.0400225	0.143017	0.0562715	0.166322	0.207256	0.0994257	0.132594	0.25891	0.308428	0.217774	0.314227
YLR447C	VMA6	567	0.123093	0.113689	0.0926717	0.171889	0.117164	0.115336	0.0208119	0.155034	0.0644627	0.119371	0.0685332	0.111504	0.193588	0.248515	0.167715	0.364182	0.346497	0.301945	0.454102
YNL024C-A	KSH1	568	0.231721	0.0725601	0.11421	0.124175	0.165225	0.11095	0.0799493	0.0689124	0.187783	0.0226381	0.113293	0.038007	0.365042	0.493572	0.824366	0.648137	0.623133	0.771597	0.533589
YJR117W	STE24	569	0.154104	0.0641829	0.100653	0.341623	0.0546454	0.127498	0.0250851	0.0135361	0.127585	0.19137	0.17648	0.296904	0.234518	0.165711	0.155896	0.256472	0.128448	0.242908	0.256335
YPL249C-A	RPL36B	570	0.230894	0.0841272	0.220455	0.209724	0.062092	0.0926791	0.047062	0.112376	0.173982	0.0142405	0.119006	0.152424	0.06143	0.331002	0.154019	0.334557	0.131432	0.270406	0.555985
YKL057C	NUP120	571	0.0898358	0.0243478	0.0687768	0.190523	0.0190366	0.0424457	0.0144346	0.316205	0.0898093	0.153368	0.170401	0.14762	0.111291	0.20984	0.378588	0.375488	0.328755	0.312093	0.497997
YLR257W	YLR257W	572	0.138005	0.132476	0.083727	0.157131	0.148667	0.0770413	0.0797347	0.302984	0.0259105	0.0147008	0.156938	0.01242	0.198193	0.0188438	0.380878	0.00570085	0.123902	0.0407562	0.01769
YOR039W	CKB2	573	0.189111	0.0342456	0.182232	0.240337	0.0885845	0.062589	0.093165	0.191919	0.14024	0.150736	0.0869926	0.112908	0.216866	0.345399	0.358404	0.414372	0.451403	0.401174	0.526903
YDR346C	SVF1	574	0.176306	0.0680542	0.162732	0.184667	0.0373686	0.0879548	0.0457854	0.154685	0.0671841	0.0917376	0.106041	0.125962	0.190125	0.253775	0.568735	0.446833	0.449389	0.301745	0.498185
YPL043W	NOP4	575	0.193972	0.132406	0.229912	0.172859	0.14921	0.0718186	0.228284	0.234898	0.185277	1.7e-05	0.108765	0.123743	0.12241	0.372373	0.50858	0.379324	0.533054	0.351297	0.568032
YOR360C	PDE2	576	0.102914	0.0728467	0.0816736	0.180983	0.0265392	0.0277242	0.0583258	0.218098	0.101092	0.144496	0.170694	0.110591	0.0533338	0.300561	0.468847	0.370434	0.293847	0.401972	0.597797
YGL029W	CGR1	577	0.194977	0.177499	0.335443	0.225989	0.260433	0.182323	0.281086	0.483155	0.406043	0.0461192	0.0636896	0.195445	0.366318	0.339436	0.389453	0.1867	0.434012	0.366054	0.339967
YFR040W	SAP155	578	0.147216	0.103117	0.152144	0.183528	0.0745543	0.0403331	0.0789519	0.215939	0.0907496	0.154046	0.237603	0.192518	0.15583	0.159006	0.264076	0.273834	0.269324	0.157394	0.441193
YNL248C	RPA49	579	0.163152	0.0962951	0.188	0.173073	0.0592542	0.147475	0.172971	0.0716098	0.0840049	0.00362485	0.146117	0.0946348	0.108436	0.433128	0.604775	0.405369	0.511562	0.468405	0.595574
YDL007W	RPT2	580	0.237312	0.13415	0.190959	0.181018	0.0864343	0.0226792	0.0513129	0.181937	0.0149815	0.0861518	0.145719	0.0661972	0.205286	0.207302	0.29499	0.368241	0.233769	0.109412	0.428841
YML024W	RPS17A	581	0.11297	0.105096	0.103374	0.18085	0.0796783	0.0907316	0.138881	0.194442	0.152801	0.107654	0.128992	0.140174	0.209014	0.579906	0.510242	0.668151	0.626964	0.660142	0.955125
YOL027C	MDM38	582	0.167305	0.117538	0.194309	0.28458	0.0780035	0.0353198	0.187193	0.105839	0.202044	0.0766586	0.17212	0.110064	0.171031	0.232026	0.192533	0.172698	0.00955845	0.155631	0.362714
YBL024W	NCL1	583	0.18669	0.0902186	0.171968	0.200776	0.0301238	0.078017	0.184216	0.222829	0.155473	0.140612	0.190774	0.0911013	0.0730422	0.268798	0.261827	0.302527	0.360559	0.296229	0.556907
YER103W	SSA4	584	0.478748	0.451153	0.523979	0.751433	0.0586545	0.094922	0.285155	0.432261	0.194533	0.237325	0.218568	0.125554	0.167786	0.192591	0.314326	0.245237	0.00292751	0.0403213	0.318476
YIL126W	STH1	585	0.229103	0.0894066	0.137606	0.220982	0.0687868	0.0406114	0.122553	0.174056	0.185169	0.215775	0.161554	0.121306	0.115362	0.167977	0.281974	0.28756	0.323503	0.250119	0.509756
YPL050C	MNN9	586	0.132995	0.150512	0.209006	0.169609	0.0903979	0.0178359	0.0214275	0.305569	0.115201	0.132403	0.142127	0.159298	0.100135	0.30313	0.268727	0.344984	0.407375	0.39079	0.525394
YOR259C	RPT4	587	0.19209	0.123194	0.245434	0.187077	0.102381	0.0892491	0.0357633	0.152969	0.111097	0.138772	0.121563	0.158988	0.160505	0.251277	0.245293	0.262134	0.145523	0.233133	0.398733
YDR174W	HMO1	588	0.114457	0.0638671	0.147617	0.247335	0.125476	0.0921576	0.190981	0.0564216	0.112411	0.168599	0.121832	0.0602158	0.0655961	0.220847	0.296291	0.157914	0.193704	0.214345	0.526839
YMR188C	MRPS17	589	0.205827	0.120829	0.134416	0.153441	0.0693994	0.0411432	0.0555339	0.178699	0.153852	0.0605509	0.110821	0.13448	0.159959	0.261836	0.300693	0.139429	0.326929	0.219268	0.364995
YOL145C	CTR9	590	0.186041	0.0610755	0.233272	0.24455	0.0822	0.0754711	0.10081	0.211216	0.116016	0.0961938	0.14709	0.140756	0.110095	0.266775	0.367273	0.420975	0.320148	0.242972	0.505407
YDR299W	BFR2	591	0.204898	0.103393	0.328459	0.209727	0.236326	0.0787304	0.382736	0.233617	0.23084	0.0606357	0.149251	0.0764941	0.19783	0.344864	0.536931	0.422098	0.458785	0.420279	0.575289
YGR020C	VMA7	592	0.189439	0.105505	0.267986	0.368675	0.0826422	0.126793	0.085682	0.0899547	0.276628	0.00777611	0.125314	0.0744752	0.053477	0.469432	0.375941	0.268444	0.218241	0.195194	0.495492
YPR072W	NOT5	593	0.192827	0.0253606	0.229513	0.260579	0.0333705	0.024218	0.139074	0.201774	0.142687	0.223417	0.138706	0.143095	0.170842	0.185575	0.334064	0.28709	0.268605	0.207411	0.405496
YDR212W	TCP1	594	0.16571	0.138577	0.164871	0.233637	0.0982833	0.068296	0.0301368	0.0905801	0.128206	0.218241	0.137914	0.271861	0.162407	0.312963	0.300953	0.409496	0.342236	0.321539	0.478273
YKL054C	DEF1	595	0.218641	0.0805182	0.299614	0.313166	0.184706	0.0165429	0.190615	0.228894	0.0901493	0.141687	0.154388	0.195204	0.12692	0.142474	0.177412	0.20928	0.0868748	0.100756	0.189154
YLR292C	SEC72	596	0.144521	0.181485	0.134723	0.284593	0.0458534	0.0846661	0.0926553	0.178956	0.154245	0.270913	0.0288752	0.049451	0.125612	0.273303	0.351815	0.478286	0.449389	0.427171	0.497286
YPL179W	PPQ1	597	0.13252	0.0670534	0.0848033	0.194567	0.0768137	0.0435842	0.0216626	0.265384	0.125239	0.18255	0.136774	0.276821	0.151765	0.232823	0.296127	0.285824	0.298836	0.236076	0.38978
YMR217W	GUA1	598	0.150055	0.170768	0.153483	0.209651	0.0871677	0.0848516	0.144099	0.0616381	0.117513	0.0747939	0.174042	0.172686	0.204381	0.383034	0.455338	0.347975	0.337795	0.468594	0.568024
YIL035C	CKA1	599	0.178131	0.0496485	0.151824	0.18315	0.00470411	0.0806573	0.0615603	0.195447	0.075937	0.112645	0.101547	0.0308702	0.20194	0.28709	0.394022	0.314097	0.281857	0.236166	0.362489
YDR381W	YRA1	600	0.143006	0.0442947	0.014623	0.0791282	0.0241968	0.0410528	0.0705545	0.139446	0.100795	0.112136	0.0651322	0.16532	0.17311	0.248163	0.247409	0.244752	0.173471	0.199428	0.298916
YHR128W	FUR1	601	0.271651	0.124362	0.132466	0.20284	0.0735694	0.182004	0.000719574	0.220193	0.175907	0.11421	0.0659751	0.0238313	0.254017	0.4501	0.617444	0.328511	0.631345	0.463993	0.673517
YMR146C	TIF34	602	0.233875	0.155359	0.205165	0.195048	0.106226	0.0651064	0.0538929	0.093039	0.140869	0.189204	0.112108	0.0251474	0.201288	0.332121	0.408184	0.325258	0.273909	0.401686	0.628851
YPL190C	NAB3	603	0.248279	0.118458	0.237397	0.260322	0.094945	0.0316723	0.145486	0.232787	0.203224	0.191297	0.222853	0.221274	0.104643	0.0565184	0.161204	0.128111	0.0693118	0.107519	0.289813
YJL014W	CCT3	604	0.19351	0.186247	0.164965	0.14246	0.0374088	0.070787	0.0154864	0.0971152	0.149186	0.0427804	0.14579	0.089826	0.230749	0.248294	0.365006	0.429563	0.36499	0.230909	0.516316
YKR052C	MRS4	605	0.00721191	0.0879891	0.0656341	0.0821273	0.0488926	0.108509	0.0589292	0.239098	0.182948	0.163518	0.132904	0.0711154	0.0856196	0.115369	0.169385	0.145777	0.115852	0.0521744	0.172522
YML103C	NUP188	606	0.150482	0.080939	0.10962	0.172428	0.0386442	0.0935882	0.0426266	0.122921	0.114015	0.173541	0.20957	0.138349	0.141806	0.222132	0.430765	0.411342	0.392645	0.319271	0.586448
YPR143W	RRP15	607	0.286961	0.101341	0.370056	0.293543	0.161319	0.12382	0.24779	0.254991	0.379598	0.0938848	0.173054	0.101965	0.177438	0.526567	0.637201	0.371344	0.663406	0.527625	0.472097
YMR246W	FAA4	608	0.0885054	0.124109	0.0928888	0.168686	0.0683151	0.133886	0.0672602	0.11913	0.23443	0.00426565	0.136097	0.148338	0.069374	0.305291	0.305399	0.157582	0.199292	0.279711	0.492004
YNL197C	WHI3	609	0.165553	0.0242039	0.138682	0.22105	0.0850842	0.0817179	0.0682264	0.18274	0.110498	0.237342	0.170257	0.163294	0.150872	0.135091	0.2146	0.143722	0.215711	0.19319	0.387797
YKL035W	UGP1	610	0.159899	0.093664	0.113402	0.292786	0.147176	0.167751	0.177929	0.276407	0.129714	0.257468	0.113918	0.18563	0.296393	0.105141	0.394645	0.0317676	0.349779	0.0929288	0.0555446
YPL202C	AFT2	611	0.15613	0.139977	0.258213	0.267914	0.10179	0.0604063	0.214324	0.0363206	0.0429168	0.141428	0.216697	0.109607	0.0401816	0.173008	0.404093	0.330728	0.20324	0.326158	0.437003
YOR089C	VPS21	612	0.240519	0.134856	0.134559	0.144986	0.121863	0.0752273	0.0538411	0.126619	0.173737	0.0325047	0.0524857	0.0811657	0.222084	0.129322	0.20968	0.275669	0.205343	0.116075	0.38746
YOL077C	BRX1	613	0.187051	0.100342	0.325859	0.236909	0.0564052	0.0758675	0.211926	0.0601467	0.161142	0.06632	0.0521251	0.0289356	0.246263	0.439675	0.676541	0.475667	0.57928	0.550123	0.63576
YBR286W	APE3	614	0.11748	0.0739277	0.0836959	0.192669	0.0340915	0.0938198	0.0100637	0.203997	0.184203	0.257495	0.219471	0.126262	0.0828539	0.141467	0.0379458	0.064906	0.0581346	0.127475	0.2034
YJL130C	URA2	615	0.125511	0.0529009	0.0430091	0.145904	0.0625823	0.08906	0.159375	0.0546524	0.0893198	0.162784	0.20688	0.108439	0.0684946	0.255983	0.205997	0.25809	0.0946173	0.216983	0.354629
YGR103W	NOP7	616	0.18854	0.166894	0.266609	0.1415	0.102932	0.171279	0.238802	0.0961815	0.110687	0.138374	0.169861	0.123868	0.199911	0.427899	0.723127	0.531198	0.56044	0.423697	0.713186
YER126C	NSA2	617	0.0739915	0.200065	0.24157	0.177233	0.140494	0.0786215	0.347489	0.139184	0.091217	0.0816932	0.123728	0.0927968	0.0707477	0.496357	0.57345	0.527051	0.571302	0.576185	0.6471
YDR450W	RPS18A	618	0.17591	0.212102	0.133321	0.222379	0.0945441	0.0688186	0.046139	0.0173717	0.0980221	0.0603318	0.0752242	0.0412759	0.243081	0.341822	0.271261	0.418902	0.560604	0.455295	0.758812
YMR183C	SSO2	619	0.188582	0.115303	0.317909	0.23613	0.112377	0.0350083	0.122222	0.0406678	0.184492	0.164123	0.138199	0.191667	0.191192	0.141835	0.0706516	0.224471	0.0418506	0.170951	0.484169
YKR014C	YPT52	620	0.120597	0.106455	0.121502	0.169444	0.0693803	0.178176	0.084693	0.212008	0.0802107	0.188225	0.108741	0.147019	0.219036	0.0706818	0.296291	0.311776	0.027612	0.186276	0.325483
YHR196W	UTP9	621	0.142087	0.125424	0.215595	0.139978	0.0250595	0.0712229	0.384071	0.105799	0.1508	0.0561842	0.144581	0.00805971	0.0817248	0.355474	0.563164	0.483391	0.580586	0.454631	0.623302
YGR229C	SMI1	622	0.237525	0.0745141	0.212638	0.195468	0.0832902	0.0171205	0.105997	0.313725	0.211648	0.135235	0.189705	0.0714783	0.188489	0.203848	0.420425	0.282608	0.281152	0.294451	0.430744
YOL049W	GSH2	623	0.164165	0.132277	0.120068	0.157344	0.0492074	0.0250142	0.0206637	0.357347	0.0994322	0.125791	0.0350832	0.0912741	0.191723	0.244237	0.200875	0.292523	0.320398	0.240468	0.458828
YML074C	FPR3	624	0.229736	0.155353	0.307281	0.22908	0.142655	0.120601	0.208416	0.0626406	0.219868	0.223717	0.178712	0.131227	0.251079	0.212818	0.129327	0.181879	0.20584	0.251109	0.279749
YIL118W	RHO3	625	0.103081	0.0976111	0.136556	0.177459	0.0727994	0.0722672	0.00110833	0.125675	0.1176	0.11622	0.076877	0.0294172	0.196145	0.437176	0.485673	0.175496	0.539558	0.385511	0.742855
YMR131C	RRB1	626	0.187481	0.173997	0.2503	0.215494	0.115961	0.0851938	0.286303	0.162665	0.199213	0.13099	0.110991	0.134244	0.212955	0.357427	0.667875	0.424172	0.570508	0.511556	0.653512
YNL061W	NOP2	627	0.207588	0.0828186	0.260233	0.183388	0.0992237	0.120803	0.215014	0.00625366	0.168652	0.140152	0.146186	0.133274	0.107263	0.40661	0.547564	0.407597	0.454913	0.361894	0.528248
YBR177C	EHT1	628	0.106701	0.036698	0.0706936	0.14957	0.187488	0.0872084	0.224357	0.305814	0.215435	0.185685	0.0233857	0.0852568	0.19906	0.0101789	0.0488252	0.227898	0.0570599	0.150759	0.0661011
YJL002C	OST1	629	0.229944	0.121655	0.135072	0.205159	0.0343624	0.0528712	0.0099444	0.248232	0.0996592	0.203165	0.143489	0.225904	0.257589	0.263256	0.140182	0.288714	0.374459	0.28317	0.430666
YDR377W	ATP17	630	0.0896369	0.0783533	0.131201	0.133179	0.230996	0.0471177	0.165656	0.129026	0.22813	0.0661017	0.141455	0.0786746	0.306425	0.349299	0.384402	0.101386	0.457471	0.531507	0.465726
YFL037W	TUB2	631	0.142395	0.111187	0.157493	0.220189	0.0410215	0.103257	0.018915	0.213884	0.149046	0.149413	0.146305	0.141119	0.266984	0.150759	0.0892454	0.0664962	0.224956	0.224132	0.389121
YPL171C	OYE3	632	0.18912	0.219761	0.140995	0.479201	0.0870136	0.301627	0.0150491	0.00614788	0.187349	0.0681671	0.10913	0.152713	0.0553483	0.113908	0.32987	0.0119509	0.0152213	0.0839544	0.091509
YGL238W	CSE1	633	0.142194	0.0476198	0.10687	0.190269	0.0470016	0.0565539	0.0676246	0.177946	0.100866	0.233585	0.137775	0.169258	0.147823	0.18704	0.322619	0.352896	0.276646	0.262964	0.526839
YPL178W	CBC2	634	0.174406	0.143487	0.133121	0.341273	0.0616044	0.084656	0.0421319	0.0191109	0.0903814	0.144496	0.0462401	0.108253	0.144337	0.396717	0.313132	0.464842	0.468974	0.436545	0.61309
YDL148C	NOP14	635	0.167273	0.147665	0.354469	0.249749	0.160266	0.170718	0.265409	0.177035	0.179432	0.0659752	0.219667	0.19201	0.107587	0.315799	0.589895	0.435883	0.501832	0.32185	0.647509
YIL038C	NOT3	636	0.155972	0.060293	0.129439	0.208262	0.0527103	0.037459	0.0602927	0.202908	0.0267256	0.105435	0.136228	0.143653	0.163084	0.109642	0.201982	0.278463	0.227117	0.182886	0.41327
YJL008C	CCT8	637	0.192299	0.113981	0.209735	0.169854	0.0504078	0.0809775	0.0299211	0.184474	0.150604	0.135798	0.149452	0.164594	0.159126	0.316773	0.404093	0.336068	0.330368	0.290514	0.465015
YOR043W	WHI2	638	0.143724	0.0365025	0.108491	0.133706	0.0597649	0.0469593	0.0584382	0.189702	0.0607198	0.0677964	0.20566	0.0741906	0.108065	0.173688	0.162962	0.252697	0.118144	0.185024	0.296123
YHR094C	HXT1	639	0.174724	0.0592254	0.387976	0.427588	0.0603466	0.155034	0.259844	0.0800314	0.182268	0.0939609	0.151699	0.161057	0.105328	0.356751	0.257897	0.255609	0.0579257	0.197719	0.121219
YGR185C	TYS1	640	0.165294	0.0175142	0.234027	0.190977	0.0218145	0.0536976	0.14802	0.159739	0.128541	0.163424	0.113895	0.0842062	0.0952475	0.236628	0.233487	0.165309	0.342608	0.225415	0.373415
YDR190C	RVB1	641	0.123214	0.152369	0.197991	0.197844	0.0979314	0.0495427	0.121809	0.234832	0.13984	0.104701	0.0679705	0.132582	0.200467	0.32574	0.397344	0.401185	0.33218	0.354388	0.489345
YML022W	APT1	642	0.188187	0.0613675	0.108764	0.142065	0.12172	0.0680379	0.0765712	0.0063503	0.109805	0.106191	0.116346	0.172697	0.151835	0.355381	0.633154	0.45364	0.672072	0.60302	0.859256
YJL177W	RPL17B	643	0.123059	0.139963	0.277665	0.182253	0.0230684	0.0452658	0.136145	0.195828	0.146815	0.0183212	0.0811842	0.092057	0.367044	0.347748	0.291249	0.323389	0.413681	0.413196	0.61764
YHR141C	RPL42B	644	0.137086	0.282589	0.154847	0.260632	0.0599689	0.0632905	0.0474211	0.0369391	0.0822073	0.14695	0.111715	0.148446	0.245731	0.490059	0.509178	0.48307	0.426556	0.505512	0.891703
YBR084C-A	RPL19A	645	0.146332	0.131506	0.182715	0.153713	0.0292931	0.0771736	0.157172	0.0510425	0.0908476	0.0888574	0.0482255	0.0518565	0.112651	0.269395	0.217384	0.255005	0.119058	0.358451	0.599851
YBL022C	PIM1	646	0.188624	0.120658	0.188636	0.251565	0.0413666	0.0223841	0.0187222	0.109691	0.0756384	0.228466	0.165053	0.225016	0.066934	0.170292	0.195098	0.24802	0.214283	0.14837	0.366918
YDR508C	GNP1	647	0.0536927	0.108016	0.109822	0.17426	0.0663861	0.0624211	0.0654958	0.219429	0.159609	0.118228	0.0401456	0.207726	0.0704736	0.243919	0.134003	0.244303	0.183781	0.262228	0.324332
YGR017W	YGR017W	648	0.173638	0.0485493	0.212193	0.293257	0.0458234	0.0830866	0.195123	0.329585	0.148311	0.0589428	0.188132	0.076256	0.160183	0.168562	0.255056	0.169517	0.328793	0.111141	0.565257
YFR010W	UBP6	649	0.181154	0.0274301	0.221433	0.179397	0.0833428	0.0261505	0.00129232	0.180645	0.0481492	0.167306	0.164716	0.0919574	0.167912	0.218632	0.264886	0.279419	0.295108	0.16043	0.433538
YDR264C	AKR1	650	0.0615795	0.0403824	0.109814	0.119977	0.0596654	0.0295749	0.0162386	0.256466	0.143803	0.204872	0.120542	0.153895	0.123176	0.235327	0.342089	0.403019	0.304909	0.287026	0.434868
YFL038C	YPT1	651	0.172274	0.120679	0.190654	0.283253	0.0937784	0.0525034	0.0255753	0.366496	0.106923	0.112792	0.0935587	0.0789987	0.168624	0.295683	0.195098	0.200646	0.225637	0.421492	0.307513
YGL077C	HNM1	652	0.0662555	0.0931293	0.186089	0.163469	0.122172	0.0338089	0.264152	0.567395	0.112866	0.178426	0.0664634	0.330171	0.422084	0.28218	0.36049	0.264421	0.359801	0.320146	0.404124
YHL011C	PRS3	653	0.165974	0.135894	0.142788	0.0886399	0.0199588	0.118474	0.148391	0.00482661	0.0947922	0.0220921	0.0690889	0.0440472	0.225442	0.480392	0.503881	0.497203	0.491725	0.487282	0.591044
YPL273W	SAM4	654	0.186159	0.0780695	0.0528613	0.182325	0.0209673	0.10712	0.17246	0.201665	0.0862291	0.224156	0.0951769	0.0816798	0.109059	0.198124	0.0588093	0.258787	0.14363	0.378503	0.427651
YKL063C	YKL063C	655	0.299635	0.0908514	0.311291	0.329574	0.0613226	0.118526	0.147237	0.337712	0.145382	0.083115	0.202827	0.0993349	0.233881	0.215311	0.296291	0.0596719	0.0724672	0.358914	0.433538
YBR130C	SHE3	656	0.206133	0.14564	0.265962	0.299378	0.0740616	0.0370048	0.0927603	0.175957	0.0649688	0.124052	0.122238	0.113858	0.151263	0.202043	0.273016	0.333669	0.474684	0.245813	0.462715
YGR132C	PHB1	657	0.198647	0.0578389	0.123619	0.220974	0.127356	0.0693956	0.0710288	0.20487	0.241917	0.178233	0.0701789	0.0245385	0.285115	0.116857	0.419196	0.36874	0.255248	0.339909	0.46914
YHR170W	NMD3	658	0.143094	0.190482	0.260172	0.203085	0.15624	0.146476	0.264435	0.17924	0.0756319	0.0054291	0.129439	0.0973127	0.104834	0.418726	0.840937	0.487764	0.625163	0.505609	0.610808
YBR049C	REB1	659	0.161423	0.091677	0.207463	0.286337	0.0623485	0.050262	0.162091	0.109598	0.0965024	0.168537	0.178488	0.14212	0.204576	0.166256	0.0822588	0.152838	0.176129	0.168866	0.367452
YDR395W	SXM1	660	0.148191	0.10405	0.136016	0.175316	0.0354288	0.0646464	0.181202	0.17772	0.0539871	0.136496	0.145423	0.1369	0.0866909	0.308881	0.562207	0.418592	0.420666	0.365741	0.599487
YGR090W	UTP22	661	0.101964	0.0867564	0.121188	0.209019	0.050281	0.0578572	0.102976	0.277422	0.064423	0.0961184	0.198206	0.0878261	0.104993	0.323656	0.426719	0.371827	0.402636	0.371747	0.575293
YOR078W	BUD21	662	0.171069	0.157935	0.363165	0.205547	0.140481	0.0598501	0.344382	0.162665	0.176715	0.0138743	0.0492807	0.185665	0.20201	0.304926	0.523556	0.386302	0.431402	0.345412	0.460939
YER136W	GDI1	663	0.113286	0.0818693	0.0889993	0.200119	0.0803976	0.0388551	0.0281942	0.238378	0.127227	0.122323	0.101005	0.19899	0.132622	0.203158	0.370709	0.288997	0.19562	0.171048	0.380959
YDL180W	YDL180W	664	0.099688	0.0942755	0.124903	0.284961	0.0722814	0.104166	0.14271	0.0998769	0.126923	0.0608573	0.155051	0.16705	0.104123	0.103091	0.144166	0.1722	0.132191	0.162565	0.249699
YPR169W	JIP5	665	0.152049	0.0946892	0.134015	0.12727	0.0139243	0.0230142	0.108026	0.139637	0.127142	0.148379	0.131372	0.171294	0.169858	0.298437	0.431115	0.435957	0.402719	0.394078	0.561225
YLR033W	RSC58	666	0.201404	0.136075	0.182912	0.201203	0.0826814	0.0535066	0.0845583	0.193837	0.11259	0.133268	0.129194	0.129603	0.187575	0.253986	0.343437	0.337498	0.31665	0.270203	0.464871
YPR043W	RPL43A	667	0.215454	0.241291	0.0885129	0.209704	0.108953	0.109781	0.0917956	0.222121	0.147929	0.136327	0.176919	0.0219933	0.0455405	0.369318	0.242459	0.350827	0.395584	0.456627	0.66186
YOL041C	NOP12	668	0.220473	0.100055	0.293639	0.230547	0.0899455	0.114336	0.236414	0.208153	0.255194	0.144734	0.0910915	0.115413	0.164487	0.336189	0.434642	0.430227	0.432498	0.385003	0.466321
YIL018W	RPL2B	669	0.112512	0.0727649	0.13696	0.187544	0.0651355	0.169783	0.162117	0.123599	0.199387	0.15304	0.153458	0.0220724	0.217237	0.430425	0.325101	0.377488	0.430495	0.467894	0.660254
YMR194W	RPL36A	670	0.211517	0.134845	0.219221	0.257811	0.0511063	0.0426491	0.0214097	0.150602	0.183247	0.152728	0.0607409	0.0310922	0.222205	0.272689	0.338112	0.22073	0.369149	0.337794	0.621338
YKR028W	SAP190	671	0.144123	0.0713702	0.0981766	0.167258	0.0343884	0.0495874	0.0421	0.289	0.0516001	0.155722	0.130614	0.198925	0.210648	0.193119	0.193941	0.329214	0.361745	0.175918	0.363239
YDR032C	PST2	672	0.0719737	0.0950437	0.0415472	0.332041	0.0727989	0.163864	0.0762179	0.0398751	0.165643	0.0446622	0.0700189	0.0743489	0.0463294	0.12895	0.339429	0.0811551	0.212401	0.0238257	0.0683111
YPL118W	MRP51	673	0.126948	0.117214	0.0600805	0.125442	0.0676288	0.0222072	0.0357858	0.00856747	0.129816	0.0778546	0.0928589	0.0384977	0.221944	0.314487	0.245293	0.301096	0.30218	0.214363	0.364995
YDL083C	RPS16B	674	0.141738	0.144906	0.191548	0.159243	0.0702788	0.115535	0.0803687	0.0692113	0.153264	0.0531045	0.0539365	0.0161254	0.178343	0.391624	0.449936	0.366665	0.306418	0.458094	0.733083
YBR146W	MRPS9	675	0.198173	0.125007	0.188528	0.213993	0.0922112	0.0489476	0.0813189	0.231007	0.155384	0.142332	0.115871	0.189373	0.056915	0.192395	0.314547	0.243506	0.0961729	0.309148	0.427509
YKL028W	TFA1	676	0.136017	0.0666445	0.202714	0.238855	0.102333	0.0210001	0.156972	0.21142	0.108624	0.115358	0.197753	0.163221	0.0953349	0.131686	0.185716	0.219858	0.272285	0.218777	0.403278
YDR028C	REG1	677	0.203296	0.0738353	0.19431	0.217496	0.058986	0.015788	0.0976078	0.20329	0.142712	0.14841	0.154495	0.15571	0.152773	0.148156	0.189546	0.185998	0.126429	0.0967573	0.343577
YKL006W	RPL14A	678	0.200774	0.153277	0.16094	0.169939	0.0371247	0.101137	0.00468541	0.0233293	0.135673	0.102785	0.0271895	0.154697	0.292908	0.423679	0.416277	0.51112	0.503688	0.577079	0.8199
YKL179C	COY1	679	0.171147	0.0816454	0.187514	0.220033	0.0331344	0.0822103	0.137608	0.212071	0.0836017	0.142045	0.143778	0.123147	0.0956754	0.160859	0.246218	0.27683	0.182854	0.141426	0.343263
YGR054W	YGR054W	680	0.193059	0.0752822	0.144084	0.161581	0.0307885	0.133276	0.124037	0.104424	0.0951201	0.0909544	0.154045	0.080526	0.0698494	0.241592	0.351377	0.20671	0.144236	0.287054	0.425049
YJL080C	SCP160	681	0.138875	0.0930298	0.15333	0.196944	0.0113229	0.0742381	0.113064	0.127924	0.106659	0.16553	0.196827	0.133405	0.235496	0.227544	0.20489	0.28932	0.17785	0.24495	0.410288
YOR290C	SNF2	682	0.179774	0.051601	0.16351	0.22661	0.0780912	0.00892218	0.0862272	0.225608	0.137287	0.21276	0.15758	0.203286	0.191651	0.154579	0.247657	0.189323	0.291498	0.167507	0.325673
YER056C	FCY2	683	0.161137	0.11658	0.177227	0.205141	0.0147485	0.14245	0.0805768	0.301554	0.16302	0.00581666	0.112897	0.131826	0.00548909	0.283104	0.311091	0.254881	0.195408	0.327486	0.381078
YPL079W	RPL21B	684	0.136458	0.120979	0.211441	0.232345	0.0454442	0.112386	0.241366	0.145949	0.190084	0.0426662	0.00935381	0.066244	0.208061	0.303151	0.406108	0.219418	0.0723813	0.401159	0.596693
YPL265W	DIP5	685	0.128643	0.253303	0.58493	0.827476	0.0702361	0.0424565	0.218801	0.412091	0.158855	0.0463745	0.0965062	0.238177	0.156186	0.389134	0.0639916	0.366284	0.01852	0.390245	0.269809
YDL025C	RTK1	686	0.149405	0.0444408	0.0691969	0.252917	0.0349182	0.116751	0.0372732	0.0641415	0.103958	0.0390169	0.148066	0.233509	0.0457674	0.0670172	0.246762	7.81e-05	0.177876	0.0838824	0.121219
YGL009C	LEU1	687	0.209277	0.0784915	0.170733	0.033038	0.114834	0.0578668	0.33564	0.269614	0.0306668	0.0130298	0.111893	0.113683	0.0186875	0.577826	0.718842	0.586493	0.524964	0.412071	0.657306
YHR135C	YCK1	688	0.152469	0.0831691	0.267236	0.309083	0.187027	0.0919816	0.19907	0.144585	0.181005	0.100563	0.189234	0.121309	0.116796	0.152693	0.23071	0.0282993	0.0899063	0.288823	0.299042
YER074W	RPS24A	689	0.130515	0.231748	0.283462	0.289642	0.0114375	0.0963612	0.0866805	0.217751	0.186626	0.081707	0.047663	0.0310921	0.134908	0.304394	0.246471	0.434811	0.325514	0.402359	0.839068
YKR081C	RPF2	690	0.126205	0.0789634	0.306845	0.249037	0.104901	0.111121	0.187622	0.0785594	0.0742307	0.0688354	0.137789	0.0500752	0.226951	0.422701	0.783362	0.50165	0.604519	0.484517	0.693734
YGR106C	VOA1	691	0.0721743	0.154056	0.151268	0.267244	0.0406189	0.0230985	0.0322753	0.14977	0.093866	0.233017	0.0856065	0.234049	0.0535068	0.34053	0.263988	0.441769	0.487201	0.376452	0.491665
YGL245W	GUS1	692	0.129825	0.137413	0.0643053	0.145226	0.0054749	0.0594363	0.0789576	0.137907	0.112155	0.208182	0.101717	0.136194	0.176351	0.224053	0.15124	0.288775	0.203142	0.232675	0.43992
YGR161C	RTS3	693	0.182995	0.110779	0.299041	0.314403	0.175422	0.15618	0.184939	0.0998962	0.0751114	0.137444	0.123717	0.210579	0.428482	0.00181941	0.305091	0.177839	0.194106	0.0662336	0.350415
YDL125C	HNT1	694	0.15811	0.225382	0.0176065	0.259723	0.0422214	0.116575	0.178635	0.185885	0.205007	0.174988	0.194956	0.129754	0.141465	0.1462	0.0645026	0.163427	0.0487239	0.307593	0.0777139
YDL122W	UBP1	695	0.128719	0.0908223	0.141113	0.174925	0.0578153	0.0527847	0.159063	0.134028	0.140338	0.127714	0.143805	0.161324	0.0693985	0.259954	0.303668	0.327196	0.255694	0.26884	0.40385
YJL136C	RPS21B	696	0.128822	0.18427	0.208139	0.176068	0.0498386	0.0776606	0.0714407	0.277126	0.0415007	0.0944703	0.0343456	0.034546	0.16691	0.411608	0.509805	0.498966	0.439026	0.468276	0.856553
YKR011C	YKR011C	697	0.139627	0.0626585	0.244227	0.322281	0.0803419	0.055461	0.0169555	0.247556	0.0705317	0.292616	0.230439	0.140546	0.251955	0.0834875	0.134006	0.0102194	0.0875144	0.00425585	0.112754
YDL053C	PBP4	698	0.206382	0.150518	0.304281	0.274573	0.0947079	0.0551056	0.0986239	0.0535689	0.0539182	0.0997819	0.0602295	0.0484819	0.179773	0.107626	0.175793	0.117844	0.359049	0.261878	0.424683
YCL054W	SPB1	699	0.197219	0.135735	0.26383	0.185699	0.144313	0.137851	0.261213	0.0905801	0.135106	0.0885898	0.103435	0.168073	0.121707	0.415192	0.691329	0.51183	0.567382	0.39739	0.628516
YCL011C	GBP2	700	0.0946162	0.073063	0.0947128	0.118581	0.0341534	0.0428004	0.0668549	0.101088	0.0886479	0.0488013	0.0557635	0.156101	0.220611	0.113364	0.215416	0.231035	0.214137	0.144123	0.395728
YDR127W	ARO1	701	0.0875614	0.0873526	0.0720349	0.135521	0.030066	0.060882	0.0134873	0.149572	0.0660995	0.0883214	0.135466	0.123405	0.0648361	0.0446651	0.0693001	0.0417169	0.062349	0.0252871	0.134647
YIL149C	MLP2	702	0.236477	0.0807496	0.26583	0.270636	0.0789689	0.0784173	0.117288	0.234174	0.217284	0.200841	0.192677	0.134991	0.169535	0.265066	0.288662	0.314393	0.300501	0.182767	0.422715
YFR002W	NIC96	703	0.148869	0.0876627	0.204252	0.186543	0.0445177	0.0351368	0.112181	0.195468	0.0702469	0.111768	0.134345	0.135157	0.12941	0.305455	0.429208	0.383195	0.3914	0.252273	0.492895
YJL133C-A	YJL133C-A	704	0.253064	0.247083	0.31392	0.335465	0.137182	0.456983	0.101453	0.133634	0.264772	0.208341	0.0820263	0.214526	0.181265	0.233268	0.139932	0.255434	0.130723	0.516096	0.0522082
YPL012W	RRP12	705	0.106605	0.0892982	0.193491	0.155106	0.0562502	0.133138	0.194711	0.165364	0.106818	0.1151	0.173983	0.14294	0.126363	0.416734	0.704003	0.484745	0.595842	0.453552	0.721547
YGR146C	ECL1	706	0.291383	0.1691	0.423482	0.46455	0.0374671	0.172849	0.178249	0.247032	0.0764341	0.27347	0.291303	0.0325979	0.265481	0.400906	0.29128	0.513969	0.45125	0.500107	0.445425
YPL215W	CBP3	707	0.102717	0.137742	0.0476519	0.216704	0.021471	0.0373255	0.039015	0.191668	0.0422921	0.204005	0.143409	0.0616738	0.187344	0.139697	0.371645	0.275511	0.315718	0.217915	0.490342
YML009C	MRPL39	708	0.155931	0.285686	0.148884	0.294705	0.165	0.115462	0.0816172	0.123008	0.154474	0.34945	0.034024	0.0298652	0.390697	0.374365	0.375047	0.2625	0.222567	0.415077	0.681758
YGR128C	UTP8	709	0.158347	0.134424	0.212127	0.187953	0.0391179	0.102695	0.175936	0.00180264	0.105369	0.0947455	0.157501	0.125709	0.12303	0.412589	0.62533	0.530071	0.502594	0.445852	0.703785
YOL068C	HST1	710	0.0921718	0.112207	0.132224	0.146276	0.0923498	0.0300215	0.137342	0.370573	0.0367103	0.14657	0.199457	0.186512	0.108155	0.154554	0.263678	0.194729	0.29208	0.233509	0.445581
YPR016C	TIF6	711	0.181072	0.162084	0.0955909	0.132493	0.0565244	0.00690589	0.088439	0.188938	0.16748	0.111016	0.154311	0.0387215	0.111663	0.436801	0.404093	0.316969	0.500827	0.550219	0.60502
YGR231C	PHB2	712	0.132574	0.0696484	0.204339	0.300408	0.0542628	0.0753232	0.00963745	0.19139	0.105641	0.0718291	0.0436913	0.178377	0.236179	0.274966	0.305823	0.274914	0.406069	0.321089	0.447682
YER123W	YCK3	713	0.151925	0.0556975	0.200189	0.270379	0.0833834	0.0359468	0.101743	0.349228	0.125437	0.14172	0.118571	0.252494	0.0691504	0.070734	0.295825	0.275827	0.219345	0.126118	0.39729
YDR226W	ADK1	714	0.190897	0.149784	0.0851268	0.138375	0.114407	0.0505804	0.00794294	0.108555	0.162133	0.107147	0.0982803	0.0649748	0.181453	0.295718	0.195098	0.252905	0.310222	0.288701	0.447133
YPR010C	RPA135	715	0.125047	0.133789	0.138853	0.149642	0.0344418	0.101005	0.126728	0.104904	0.106026	0.0994736	0.173192	0.180679	0.0911719	0.413446	0.56408	0.397014	0.49236	0.381519	0.66186
YGR130C	YGR130C	716	0.21998	0.109651	0.22859	0.300662	0.0956978	0.0428196	0.0422077	0.243764	0.0491056	0.253796	0.157637	0.184293	0.308887	0.00817538	0.0689906	0.0284875	0.0146495	0.123461	0.180742
YEL051W	VMA8	717	0.167965	0.203505	0.217381	0.29843	0.108458	0.139342	0.00495903	0.149609	0.0652135	0.215452	0.185885	0.0849168	0.138995	0.312864	0.353328	0.220839	0.319111	0.273515	0.428687
YCR004C	YCP4	718	0.13491	0.0441049	0.121098	0.350335	0.118072	0.0786762	0.196784	0.193325	0.21861	0.0768184	0.104549	0.0333672	0.166307	0.372555	0.0551861	0.0761339	0.182352	0.253008	0.175998
YMR295C	YMR295C	719	0.199088	0.252319	0.253294	0.442713	0.100325	0.0364807	0.164673	0.0431702	0.220953	0.179912	0.0430121	0.106675	0.0676071	0.220116	0.267587	0.119818	0.239366	0.336267	0.398196
YNL044W	YIP3	720	0.201792	0.122524	0.0735841	0.14507	0.169362	0.170553	0.0254678	0.213634	0.148138	0.147082	0.161397	0.0818007	0.218931	0.267031	0.398974	0.170477	0.36613	0.431956	0.580047
YML093W	UTP14	721	0.197409	0.127539	0.276245	0.197338	0.177303	0.115352	0.233741	0.165668	0.141218	0.067989	0.170068	0.139437	0.121464	0.41652	0.54327	0.429516	0.492708	0.375051	0.654847
YDR152W	GIR2	722	0.236619	0.0655236	0.325415	0.257003	0.196284	0.0615825	0.0491527	0.121294	0.0659745	0.0993461	0.118464	0.0350161	0.262977	0.172183	0.30989	0.214943	0.309526	0.263395	0.433538
YDR153C	ENT5	723	0.147311	0.144112	0.255948	0.265432	0.122204	0.0934422	0.134934	0.119653	0.0744617	0.149294	0.0758928	0.107906	0.0713884	0.109169	0.359232	0.207628	0.172786	0.207298	0.387422
YLR297W	YLR297W	724	0.184297	0.30507	0.0897484	0.281092	0.148699	0.0618991	0.0815556	0.0980003	0.114356	0.126613	0.421782	0.240761	0.221634	0.310032	0.248174	0.37032	0.320283	0.559458	0.267928
YPL146C	NOP53	725	0.316206	0.151263	0.338416	0.322836	0.143254	0.114395	0.195633	0.306617	0.359098	0.104845	0.233854	0.0483244	0.126196	0.377717	0.736655	0.591213	0.652162	0.413322	0.647203
YNL005C	MRP7	726	0.131473	0.101489	0.15533	0.172574	0.0590006	0.0344767	0.0111402	0.215847	0.0663766	0.00621779	0.0883293	0.208294	0.280303	0.232478	0.318766	0.362015	0.272859	0.249291	0.37313
YPL105C	SYH1	727	0.19488	0.0802922	0.209489	0.147243	0.153006	0.0522591	0.161479	0.224468	0.129423	0.13526	0.134515	0.106077	0.154205	0.237595	0.231589	0.138248	0.290772	0.190409	0.316834
YNR021W	YNR021W	728	0.0828563	0.0898525	0.203692	0.247548	0.0918104	0.073012	0.178115	0.231007	0.139441	0.23311	0.168652	0.163657	0.252283	0.212563	0.283898	0.276717	0.245977	0.414371	0.548648
YPL019C	VTC3	729	0.217381	0.164191	0.148369	0.209467	0.13744	0.109656	0.0241472	0.412655	0.0481658	0.202417	0.269094	0.232146	0.177987	0.880484	0.991665	0.84954	0.759047	0.92381	1.05359
YJR014W	TMA22	730	0.207462	0.107108	0.237424	0.229302	0.0798985	0.0734477	0.180475	0.241887	0.242951	0.0625782	0.160947	0.0673296	0.126966	0.325175	0.238947	0.155035	0.0177278	0.353106	0.519903
YHR005C	GPA1	731	0.24791	0.0377388	0.279953	0.170612	0.0592931	0.017722	0.087762	0.30519	0.0765583	0.0314136	0.147603	0.0994261	0.193997	0.20606	0.317433	0.317489	0.329653	0.319851	0.425464
YBR162W-A	YSY6	732	0.251768	0.271101	0.347409	0.368829	0.220394	0.0500584	0.150464	0.372405	0.277769	0.118633	0.144522	0.138708	0.449574	0.120029	0.346915	0.195757	0.00652941	0.0679536	0.507574
YML056C	IMD4	733	0.128697	0.206258	0.153561	0.161684	0.098099	0.0184087	0.0750886	0.148832	0.169247	0.158829	0.151538	0.13061	0.0970756	0.328699	0.593562	0.455002	0.427627	0.433277	0.543126
YKL145W	RPT1	734	0.181736	0.0625273	0.182208	0.268322	0.0695849	0.106708	0.068733	0.145111	0.080914	0.111679	0.18874	0.168906	0.216668	0.183452	0.291102	0.300535	0.248172	0.2573	0.377729
YHR203C	RPS4B	735	0.140357	0.116929	0.149888	0.273311	0.0779598	0.0786948	0.215724	0.0525612	0.21934	0.00364436	0.0346612	0.0811464	0.118303	0.335582	0.381421	0.42975	0.345579	0.485993	0.746146
YGL244W	RTF1	736	0.228209	0.104937	0.212104	0.200763	0.0880794	0.0327987	0.0262576	0.181883	0.191557	0.131839	0.208058	0.14607	0.136331	0.225097	0.181818	0.266641	0.226685	0.220214	0.237151
YDL116W	NUP84	737	0.114112	0.105341	0.112029	0.163132	0.0663379	0.0534966	0.0378286	0.176799	0.0779678	0.0684379	0.138609	0.140412	0.207612	0.211374	0.420113	0.35321	0.351178	0.31308	0.390342
YDL143W	CCT4	738	0.10218	0.100098	0.212472	0.239786	0.0373302	0.0341937	0.146661	0.120967	0.111257	0.0101957	0.139492	0.161371	0.132796	0.236614	0.190955	0.353301	0.286652	0.291305	0.447236
YMR203W	TOM40	739	0.146911	0.0241745	0.134604	0.200323	0.0936985	0.0922922	0.0288606	0.107161	0.231993	0.212927	0.0845794	0.211691	0.108168	0.155436	0.257764	0.133666	0.0341197	0.236526	0.341483
YLR310C	CDC25	740	0.16195	0.0510622	0.109975	0.188419	0.0578933	0.0212715	0.0664199	0.172648	0.06522	0.174443	0.186196	0.134247	0.106502	0.205273	0.338025	0.324777	0.344666	0.228145	0.531361
YOR008C	SLG1	741	0.159948	0.0762485	0.131125	0.176615	0.0616894	0.144869	0.0642886	0.135013	0.177163	0.111848	0.0938556	0.168172	0.329775	0.218275	0.405781	0.257373	0.116172	0.213745	0.481669
YKL120W	OAC1	742	0.166986	0.145778	0.194554	0.0955493	0.0252993	0.0995141	0.356887	0.0121012	0.177234	0.017476	0.135712	0.140028	0.108859	0.586243	0.849468	0.536955	0.72871	0.511758	0.754293
YDR335W	MSN5	743	0.164066	0.0638451	0.124388	0.185486	0.0546116	0.0163118	0.0777804	0.221162	0.0776829	0.200654	0.158495	0.142266	0.16008	0.127173	0.31752	0.334305	0.279998	0.206485	0.462221
YHR077C	NMD2	744	0.165975	0.0595057	0.187994	0.158406	0.0480691	0.062426	0.125222	0.235172	0.129442	0.157591	0.186323	0.113261	0.136913	0.239905	0.289624	0.333489	0.309163	0.24561	0.466082
YGR267C	FOL2	745	0.163602	0.133645	0.0584078	0.244732	0.0694299	0.0588661	0.105898	0.114352	0.0943566	0.0514985	0.191462	0.0800361	0.0530249	0.299723	0.163896	0.338919	0.206473	0.191378	0.229496
YEL033W	MTC7	746	0.409869	0.16925	0.312652	0.335063	0.0240933	0.14853	0.0512073	0.0898161	0.636755	0.189491	0.28489	0.0820088	0.534874	0.360318	0.453914	0.175996	0.659559	0.387774	0.273189
YPR067W	ISA2	747	0.122098	0.177509	0.0966556	0.247721	0.105224	0.0819014	0.121289	0.0081315	0.277345	0.236095	0.0846943	0.0267581	0.166335	0.359333	0.183427	0.394384	0.491792	0.42998	0.484007
YBR086C	IST2	748	0.113552	0.0350217	0.110846	0.23256	0.0126131	0.123434	0.0295033	0.23091	0.0905624	0.186197	0.17669	0.206118	0.177233	0.174781	0.168212	0.24733	0.105607	0.220545	0.448281
YGR175C	ERG1	749	0.112791	0.154788	0.110646	0.141008	0.0427467	0.10216	0.0655065	0.252709	0.111229	0.164665	0.0872465	0.186566	0.181397	0.426921	0.513097	0.459483	0.476065	0.473673	0.556377
YGL043W	DST1	750	0.159223	0.0956562	0.269107	0.34456	0.0845811	0.0560275	0.204715	0.0836604	0.106499	0.0347887	0.135988	0.127512	0.281806	0.297343	0.440019	0.186757	0.323642	0.242115	0.418019
YGL078C	DBP3	751	0.264132	0.139738	0.233722	0.175845	0.0960876	0.115796	0.145055	0.207346	0.132539	0.127943	0.105102	0.154323	0.0886211	0.326782	0.688907	0.319602	0.537359	0.409264	0.571216
YJL168C	SET2	752	0.182098	0.0702959	0.166659	0.201426	0.150039	0.0511259	0.0424158	0.188602	0.128413	0.10906	0.072578	0.149928	0.18451	0.210442	0.297969	0.243518	0.27982	0.186172	0.354741
YMR037C	MSN2	753	0.150897	0.0393561	0.185026	0.252104	0.104435	0.0923837	0.00973339	0.300457	0.104262	0.229131	0.109452	0.237611	0.172892	0.0235227	0.113822	0.134909	0.096019	0.0701868	0.257138
YLR221C	RSA3	754	0.171396	0.185061	0.301555	0.180597	0.00800815	0.129309	0.167092	0.197452	0.093817	0.0916821	0.10342	0.0523218	0.189565	0.330869	0.620917	0.442351	0.754448	0.471459	0.710174
YML038C	YMD8	755	0.087879	0.0422961	0.117946	0.157422	0.0667456	0.0348716	0.0267822	0.248668	0.0736139	0.159305	0.133621	0.0940108	0.0972476	0.170701	0.245067	0.323624	0.278764	0.296309	0.376902
YOR224C	RPB8	756	0.107651	0.245506	0.110396	0.24434	0.0527114	0.1067	0.0976663	0.0216861	0.194689	0.0947887	0.050351	0.0339047	0.233415	0.409583	0.380296	0.273152	0.350555	0.325289	0.622801
YNL091W	NST1	757	0.219669	0.0743339	0.197748	0.21885	0.131892	0.0696762	0.230688	0.29951	0.197138	0.207564	0.233608	0.174834	0.115867	0.19872	0.229127	0.247854	0.23609	0.187648	0.443706
YGR167W	CLC1	758	0.146586	0.166709	0.200673	0.224063	0.0622148	0.0541115	0.0159616	0.289058	0.166948	0.130053	0.0220544	0.0297031	0.259613	0.183499	0.18929	0.068581	0.0879036	0.155862	0.157276
YGL188C-A	YGL188C-A	759	0.138348	0.329687	0.13877	0.142649	0.0617047	0.0399245	0.0714407	0.26907	0.311268	0.278492	0.203801	0.1739	0.321566	0.67233	0.654422	0.677961	0.576729	0.638807	0.713152
YFR050C	PRE4	760	0.161189	0.163782	0.113192	0.199755	0.0782869	0.134391	0.084693	0.0612842	0.248827	0.0876038	0.0956733	0.0678956	0.312316	0.356847	0.517782	0.243089	0.348414	0.39395	0.326445
YKL104C	GFA1	761	0.140821	0.0721165	0.0777742	0.187619	0.105216	0.0510671	0.0769175	0.139894	0.0549901	0.159078	0.147068	0.197314	0.187538	0.165103	0.158418	0.294192	0.267617	0.202477	0.491118
YDR062W	LCB2	762	0.137207	0.0420429	0.0563898	0.175598	0.0555334	0.0455306	0.0820089	0.127851	0.0785503	0.158967	0.125957	0.190662	0.220663	0.16887	0.286125	0.30277	0.241502	0.249662	0.532976
YOR247W	SRL1	763	0.207977	0.140763	0.140053	0.245314	0.0372566	0.127553	0.0247559	0.0915461	0.236386	0.398235	0.172142	0.119266	0.450044	0.159881	0.00500374	0.231903	0.139943	0.265767	0.222961
YML081C-A	ATP18	764	0.237928	0.0590982	0.160338	0.295759	0.135901	0.041397	0.182851	0.199087	0.227697	0.0399471	0.0105504	0.0738763	0.302269	0.305114	0.124059	0.231035	0.154985	0.157545	0.213996
YCR033W	SNT1	765	0.167676	0.0877519	0.210663	0.179329	0.159537	0.0144482	0.147963	0.179753	0.0827015	0.158422	0.199924	0.189396	0.0737264	0.178183	0.204613	0.183702	0.154897	0.0793959	0.295716
YJL012C	VTC4	766	0.178655	0.0377597	0.167827	0.0958731	0.0650381	0.0458234	0.0093407	0.288581	0.0725569	0.228873	0.165534	0.16464	0.188142	0.661012	0.818565	0.610484	0.612523	0.665639	0.890847
YKL080W	VMA5	767	0.144094	0.0848344	0.11469	0.140013	0.0106147	0.125713	0.0741584	0.219463	0.0958383	0.0574176	0.026595	0.179964	0.217269	0.232816	0.216873	0.260586	0.0676639	0.323416	0.399242
YOR326W	MYO2	768	0.20027	0.0632847	0.140903	0.214966	0.0148746	0.058446	0.0684002	0.272004	0.0941501	0.167094	0.158752	0.0875876	0.204069	0.282562	0.359804	0.389101	0.301191	0.224597	0.486813
YCR082W	AHC2	769	0.202156	0.0990566	0.249428	0.162332	0.0927224	0.197349	0.0643326	0.327845	0.224806	0.068602	0.0855921	0.0630175	0.286445	0.308234	0.412928	0.400717	0.589174	0.359649	0.714739
YLR432W	IMD3	770	0.16831	0.104023	0.0814041	0.109123	0.0276531	0.115329	0.115743	0.211521	0.120954	0.129728	0.105407	0.0737376	0.175398	0.283917	0.391418	0.317606	0.316024	0.321731	0.491987
YMR173W	DDR48	771	0.185204	0.035136	0.116086	0.422122	0.0205329	0.106127	0.143933	0.0094629	0.143253	0.120989	0.397152	0.0857724	0.206462	0.114059	0.0727422	0.352702	0.0105906	0.126607	0.0711303
YBR029C	CDS1	772	0.0561756	0.124151	0.0999558	0.172715	0.0551197	0.0755227	0.25787	0.52224	0.172656	0.211895	0.114841	0.140688	0.340585	0.321071	0.381762	0.334316	0.21089	0.305623	0.342055
YPL090C	RPS6A	773	0.0672051	0.141326	0.216174	0.192579	0.105071	0.10227	0.0965339	0.240157	0.0378983	0.0741325	0.0829829	0.0839333	0.158728	0.416904	0.337237	0.409935	0.3888	0.509563	0.740801
YBR199W	KTR4	774	0.0366805	0.0235215	0.0318155	0.200104	0.104579	0.0952151	0.0671038	0.204034	0.124272	0.235785	0.04439	0.153971	0.295731	0.135069	0.263861	0.278494	0.272229	0.169674	0.3026
YER006W	NUG1	775	0.152489	0.139844	0.287699	0.186069	0.138931	0.113791	0.283001	0.0285461	0.103286	0.0972292	0.154453	0.175708	0.117294	0.457335	0.645449	0.426601	0.496518	0.399796	0.61984
YDL067C	COX9	776	0.159273	0.128983	0.164512	0.192495	0.0121023	0.0428302	0.151436	0.167023	0.163243	0.0911803	0.0401114	0.107144	0.132597	0.461377	0.29808	0.279634	0.542073	0.389135	0.470951
YDR280W	RRP45	777	0.16303	0.117762	0.242111	0.165501	0.0703743	0.0346712	0.111517	0.29014	0.0647609	0.0123849	0.12362	0.0935849	0.0683801	0.358264	0.526662	0.41839	0.489292	0.440634	0.566714
YHR190W	ERG9	778	0.121491	0.0948625	0.175772	0.221229	0.0530545	0.0558156	0.0461095	0.204696	0.102022	0.137775	0.104932	0.188975	0.244299	0.141722	0.237068	0.206182	0.257953	0.199132	0.346618
YBL030C	PET9	779	0.0424254	0.0766949	0.106443	0.131475	0.144857	0.13404	0.168435	0.101195	0.125128	0.289747	0.0589076	0.163985	0.210886	0.0676769	0.184753	0.0634405	0.0218011	0.144362	0.126274
YOR209C	NPT1	780	0.0867092	0.0771757	0.145456	0.214231	0.0681023	0.0796506	0.0849806	0.0916621	0.0619704	0.175898	0.108907	0.137042	0.0580996	0.233677	0.235294	0.285122	0.333068	0.276763	0.371001
YMR015C	ERG5	781	0.122918	0.124768	0.052107	0.162671	0.0755208	0.0585352	0.0798445	0.248039	0.135101	0.228715	0.140711	0.220038	0.376254	0.350164	0.36966	0.485222	0.440106	0.436491	0.540669
YLL029W	FRA1	782	0.102327	0.0475876	0.0577235	0.157091	0.019849	0.0837082	0.0369933	0.132238	0.0839797	0.155091	0.146358	0.156228	0.120492	0.136803	0.248281	0.213976	0.296046	0.147837	0.351207
YPR137W	RRP9	783	0.183777	0.125759	0.183445	0.175552	0.155023	0.0616385	0.233275	0.20494	0.0694403	0.0166207	0.148796	0.0320682	0.104024	0.33996	0.504041	0.431908	0.518049	0.380398	0.628045
YGL228W	SHE10	784	0.146619	0.0851489	0.193673	0.242551	0.0491125	0.0602223	0.105956	0.245077	0.0891259	0.158596	0.0938252	0.231165	0.0227481	0.16962	0.200159	0.172935	0.074211	0.206763	0.343895
YDR293C	SSD1	785	0.144142	0.0384751	0.106693	0.200197	0.0715943	0.0961503	0.00431005	0.179978	0.0944655	0.235777	0.161351	0.116338	0.0806693	0.154665	0.0111982	0.0958308	0.0743333	0.0713824	0.232528
YGL048C	RPT6	786	0.178807	0.164913	0.147487	0.220605	0.0313415	0.0496295	0.0471378	0.0509776	0.0694198	0.148792	0.144276	0.0811523	0.293581	0.25659	0.44432	0.305475	0.328673	0.289632	0.403155
YLR262C-A	TMA7	787	0.273193	0.345151	0.229378	0.228548	0.0620572	0.115629	0.399256	0.314218	0.145887	0.0671265	0.217499	0.00675024	0.247241	0.414805	0.0729986	0.424211	0.524542	0.451382	0.741271
YEL031W	SPF1	788	0.10218	0.0968789	0.0919748	0.146185	0.0429337	0.0959258	0.0123778	0.163176	0.102949	0.20965	0.108511	0.245845	0.169437	0.183011	0.235312	0.243568	0.225294	0.213494	0.460128
YNL098C	RAS2	789	0.188021	0.164749	0.114916	0.196791	0.107557	0.105325	0.0660287	0.0696098	0.222273	0.0979277	0.0380344	0.141611	0.261698	0.066098	0.0523183	0.0230541	0.261006	0.0369145	0.0928833
YGR204W	ADE3	790	0.142781	0.09775	0.120371	0.199056	0.0454926	0.0883658	0.133703	0.100384	0.196796	0.0927234	0.140303	0.107974	0.0469292	0.0575832	0.22338	0.0741843	0.282569	0.027212	0.0194167
YEL013W	VAC8	791	0.102854	0.0790112	0.0819237	0.192673	0.123072	0.0480792	0.14703	0.120905	0.0660873	0.152499	0.03157	0.197385	0.168821	0.120735	0.148351	0.29985	0.0613109	0.221894	0.45503
YER030W	CHZ1	792	0.259255	0.21692	0.292834	0.288389	0.170616	0.110086	0.121289	0.111369	0.313354	0.12539	0.179514	0.114753	0.192373	0.0551551	0.252123	0.385651	0.131774	0.155454	0.216821
YFL005W	SEC4	793	0.138869	0.0773552	0.154028	0.268614	0.192628	0.0627407	0.0342166	0.213383	0.0823523	0.161768	0.173299	0.0725898	0.211075	0.146253	0.27848	0.190644	0.244637	0.375994	0.506352
YOL029C	YOL029C	794	0.206789	0.15456	0.294417	0.316451	0.146399	0.131002	0.264762	0.16358	0.10955	0.225379	0.236669	0.183372	0.185382	0.228308	0.137985	0.141774	0.110589	0.176912	0.273382
YNL157W	IGO1	795	0.152898	0.0761998	0.31776	0.254987	0.113222	0.104554	0.169678	0.357143	0.139248	0.137715	0.122991	0.234655	0.181676	0.217408	0.547387	0.13701	0.250623	0.260041	0.320312
YCL064C	CHA1	796	0.530674	0.287034	0.976228	0.936531	0.0338606	0.0907212	0.748504	0.941503	0.503797	0.164452	0.0591411	0.44385	0.493751	0.370812	0.171793	0.382376	0.265027	0.545378	0.576687
YMR125W	STO1	797	0.148336	0.0342637	0.102222	0.189954	0.0467459	0.069524	0.0688731	0.264974	0.10096	0.175927	0.167174	0.155342	0.187053	0.22081	0.434548	0.412127	0.470538	0.387762	0.646562
YJL061W	NUP82	798	0.173477	0.0523619	0.156097	0.212153	0.0397014	0.0630593	0.143134	0.185433	0.108348	0.164803	0.174532	0.138744	0.199114	0.261338	0.334833	0.379143	0.350612	0.241514	0.544425
YOR046C	DBP5	799	0.101316	0.104748	0.161563	0.228557	0.0390487	0.127224	0.143418	0.180668	0.160271	0.145196	0.073034	0.215998	0.175837	0.169044	0.422274	0.368012	0.314512	0.260077	0.469577
YJL138C	TIF2	800	0.226246	0.191832	0.181809	0.213275	0.0155641	0.096393	0.170304	0.223771	0.138193	0.169027	0.20262	0.102094	0.158714	0.277942	0.455129	0.45126	0.285123	0.365833	0.603323
YFR031C-A	RPL2A	801	0.147179	0.0766492	0.0691313	0.21116	0.0285514	0.200761	0.198684	0.114352	0.209715	0.106657	0.0804835	0.0306324	0.137833	0.261379	0.219378	0.396784	0.318512	0.391255	0.516953
YJR139C	HOM6	802	0.140305	0.0707012	0.0603604	0.180536	0.0699126	0.0487556	0.0497998	0.0779906	0.0524013	0.138951	0.191937	0.200809	0.226244	0.27347	0.271304	0.437252	0.307499	0.374441	0.500579
YOL004W	SIN3	803	0.164344	0.0603553	0.115983	0.210736	0.0589424	0.0378258	0.0180974	0.218401	0.154412	0.198204	0.17072	0.152621	0.0895901	0.152275	0.177457	0.220586	0.105882	0.119873	0.340994
YPR033C	HTS1	804	0.159312	0.0803814	0.12534	0.139638	0.107117	0.0876137	0.100773	0.0376482	0.0747805	0.134286	0.114387	0.143049	0.121089	0.234315	0.276762	0.315374	0.315529	0.317412	0.537122
YJL140W	RPB4	805	0.133639	0.0696294	0.189902	0.208284	0.0646624	0.0465967	0.00740514	0.232884	0.0981653	0.0480933	0.0710528	0.0345795	0.298446	0.290883	0.262467	0.280598	0.452365	0.241766	0.347013
YER112W	LSM4	806	0.138847	0.118844	0.2409	0.174454	0.103815	0.0240271	0.027476	0.106994	0.00926435	0.254033	0.15746	0.0583546	0.218935	0.194131	0.503723	0.424833	0.435053	0.319638	0.319699
YGL114W	YGL114W	807	0.0734896	0.15097	0.0734877	0.23261	0.070136	0.0853245	0.0477414	0.0995117	0.113272	0.0153219	0.0820144	0.190101	0.100498	0.197387	0.0560849	0.184814	0.133931	0.159972	0.102562
YOR051C	ETT1	808	0.210136	0.149701	0.222078	0.171685	0.114429	0.048118	0.164902	0.042268	0.129362	0.178223	0.121575	0.11195	0.152333	0.317337	0.259283	0.326234	0.247422	0.392607	0.548093
YML129C	COX14	809	0.344238	0.119993	0.270847	0.193103	0.0200318	0.192905	0.0825434	0.240561	0.102834	0.28126	0.214765	0.11272	0.194905	0.0586072	0.375047	0.0561438	0.507932	0.167483	0.329068
YDR211W	GCD6	810	0.122204	0.0898342	0.149419	0.225787	0.0798215	0.042936	0.107717	0.166233	0.0757829	0.0896549	0.161469	0.121445	0.0667182	0.310963	0.413533	0.406935	0.431091	0.318788	0.600248
YKL181W	PRS1	811	0.180102	0.084413	0.123603	0.198797	0.0906665	0.0751376	0.139209	0.114352	0.114952	0.135189	0.0980318	0.0386411	0.166582	0.350187	0.510551	0.496441	0.532698	0.396267	0.645584
YDL191W	RPL35A	812	0.0830119	0.134601	0.229413	0.275827	0.0722159	0.0513822	0.166979	0.174341	0.0815721	0.104726	0.0749448	0.079027	0.229252	0.248175	0.498895	0.381319	0.466861	0.442319	0.615225
YDR483W	KRE2	813	0.160206	0.198178	0.112532	0.194636	0.0842633	0.056753	0.186743	0.0780709	0.0820543	0.215	0.106123	0.137609	0.0713907	0.292908	0.241906	0.258484	0.225637	0.456627	0.591875
YJL167W	ERG20	814	0.149114	0.0742255	0.13019	0.170002	0.0795143	0.165258	0.0834735	0.274432	0.114662	0.179407	0.0718148	0.202903	0.203997	0.161181	0.153926	0.199002	0.127399	0.336267	0.313534
YCR020W-B	HTL1	815	0.222281	0.290508	0.326128	0.398597	0.0978729	0.106699	0.163402	0.203571	0.310652	0.311581	0.179531	0.114944	0.347882	0.496264	0.236962	0.434758	0.149372	0.332352	0.520142
YBR279W	PAF1	816	0.227124	0.152532	0.13261	0.192224	0.18844	0.0256861	0.117327	0.154593	0.0829274	0.169741	0.143892	0.119511	0.0596099	0.218762	0.231159	0.247446	0.168977	0.233294	0.283723
YJL174W	KRE9	817	0.230539	0.136449	0.0915797	0.238692	0.0583857	0.144064	0.0561736	0.25991	0.208034	0.151359	0.125844	0.18325	0.291284	0.157542	0.335531	0.160822	0.153377	0.373633	0.46724
YJR145C	RPS4A	818	0.194917	0.0516323	0.0556635	0.202242	0.0509009	0.127175	0.11946	0.114352	0.134084	0.229318	0.0481175	0.0901636	0.178526	0.444268	0.301546	0.379594	0.316831	0.509563	0.683756
YOR260W	GCD1	819	0.214779	0.0930069	0.249861	0.252773	0.0642242	0.0424361	0.0966785	0.206184	0.142734	0.157144	0.118189	0.112696	0.134236	0.349931	0.486817	0.31296	0.358675	0.399283	0.394577
YOR317W	FAA1	820	0.0815229	0.126708	0.18792	0.271425	0.173307	0.0907288	0.270125	0.545861	0.164533	0.267219	0.122954	0.200708	0.133043	0.0389636	0.129232	0.101386	0.191049	0.0107231	0.159129
YNL037C	IDH1	821	0.224718	0.153469	0.235669	0.182173	0.0634859	0.180366	0.0965691	0.017955	0.265417	0.0219793	0.105493	0.0593463	0.348786	0.182751	0.0933449	0.202937	0.0804995	0.346154	0.24211
YER049W	TPA1	822	0.0967	0.117454	0.154121	0.176351	0.0127729	0.0893083	0.128017	0.109315	0.15874	0.132918	0.150776	0.150107	0.116475	0.339883	0.443853	0.293341	0.351725	0.372015	0.573276
YBR031W	RPL4A	823	0.218112	0.0353529	0.187182	0.254891	0.0860324	0.0770899	0.127407	0.164835	0.172084	0.127278	0.0448255	0.0963744	0.103693	0.314964	0.148573	0.265522	0.168501	0.298396	0.434673
YKL016C	ATP7	824	0.134373	0.183026	0.200002	0.288311	0.0720191	0.0534748	0.0631518	0.242505	0.0427172	0.251221	0.0699288	0.118135	0.178047	0.136437	0.14949	0.197995	0.184442	0.198377	0.395276
YOR184W	SER1	825	0.144756	0.129805	0.073771	0.251515	0.063792	0.121655	0.150269	0.170558	0.146565	0.0373824	0.0794434	0.112657	0.0403461	0.107936	0.11149	0.159405	0.0401401	0.234959	0.0429332
YER141W	COX15	826	0.0633165	0.119282	0.113459	0.177892	0.0440679	0.095805	0.093339	0.0581385	0.10426	0.0271448	0.0918177	0.207283	0.0255039	0.20005	0.034265	0.311804	0.347696	0.296447	0.372643
YLR106C	MDN1	827	0.223755	0.0841209	0.175423	0.13974	0.0321869	0.093286	0.160939	0.165804	0.136572	0.104178	0.170523	0.0161472	0.108487	0.355729	0.551343	0.431824	0.501205	0.316523	0.621042
YER155C	BEM2	828	0.206418	0.0398934	0.151594	0.222141	0.0440027	0.0293658	0.085982	0.151058	0.0464909	0.22498	0.233892	0.117895	0.109865	0.240929	0.415688	0.349555	0.352897	0.270429	0.496075
YGR065C	VHT1	829	0.208239	0.162697	0.424288	0.450713	0.0500705	0.116218	0.237079	0.214166	0.103828	0.0694507	0.128578	0.165147	0.123238	0.189067	0.230943	0.477201	0.483459	0.366407	0.399199
YDR309C	GIC2	830	0.230209	0.121999	0.169476	0.274314	0.0981906	0.0646701	0.056033	0.237869	0.242552	0.298203	0.193403	0.0675292	0.213244	0.158673	0.133519	0.180147	0.0681658	0.10836	0.18793
YER110C	KAP123	831	0.123043	0.0401398	0.131584	0.167098	0.0947684	0.0923178	0.163591	0.0185381	0.111106	0.237274	0.188742	0.159927	0.0842069	0.279263	0.350606	0.357028	0.284444	0.364522	0.547037
YHR019C	DED81	832	0.115444	0.0676576	0.0842376	0.164818	0.0717488	0.0370518	0.0718657	0.101088	0.111104	0.135598	0.09571	0.1088	0.127609	0.192179	0.103008	0.0599689	0.0101419	0.134423	0.268413
YDR372C	VPS74	833	0.114221	0.0571733	0.0738474	0.120384	0.103071	0.0748316	0.0747561	0.102969	0.0932477	0.0404536	0.0704358	0.0334481	0.22434	0.156196	0.318272	0.351686	0.320247	0.289615	0.422936
YBR071W	YBR071W	834	0.191921	0.0814098	0.214394	0.25969	0.248751	0.0662748	0.136499	0.153489	0.281857	0.230178	0.293361	0.186562	0.196717	0.0284928	0.135503	0.143157	0.150863	0.0697798	0.0603746
YDR308C	SRB7	835	0.0670161	0.171898	0.268414	0.238189	0.11683	0.107919	0.0560791	0.00134333	0.190904	0.245315	0.0901007	0.125073	0.1457	0.377632	0.32639	0.373477	0.47874	0.342768	0.530568
YKL160W	ELF1	836	0.15056	0.268284	0.309971	0.279428	0.143943	0.0742541	0.0713802	0.190073	0.0749814	0.132371	0.117742	0.0981854	0.220291	0.322762	0.0150264	0.450491	0.23072	0.309983	0.290211
YDL132W	CDC53	837	0.181677	0.0560525	0.155054	0.244926	0.108882	0.0675774	0.0479748	0.265407	0.110845	0.251745	0.166293	0.169541	0.0776736	0.149569	0.272688	0.268179	0.179419	0.130648	0.241197
YPR062W	FCY1	838	0.191106	0.123784	0.0390125	0.191312	0.0704504	0.0589174	0.0115257	0.128825	0.245226	0.0501253	0.0896387	0.0594602	0.158508	0.290761	0.238947	0.159715	0.512409	0.380687	0.404685
YOR123C	LEO1	839	0.248455	0.180359	0.247603	0.201183	0.134168	0.107382	0.167157	0.229343	0.232038	0.146788	0.145912	0.103523	0.139945	0.252667	0.160198	0.27774	0.326641	0.166153	0.386084
YDL066W	IDP1	840	0.141756	0.0619029	0.0370098	0.106941	0.0789697	0.127704	0.0369933	0.0814841	0.107549	0.214093	0.0871473	0.0768414	0.100076	0.00319357	0.174324	0.0483701	0.274227	0.163828	0.0297925
YBL004W	UTP20	841	0.16877	0.117312	0.125142	0.126791	0.0454063	0.112738	0.0851492	0.0886844	0.0819605	0.0798728	0.213987	0.0485257	0.121314	0.409353	0.732231	0.544961	0.605324	0.436373	0.742718
YCR028C-A	RIM1	842	0.0375963	0.135093	0.203529	0.339942	0.0303982	0.102718	0.0462669	0.123184	0.203779	0.149658	0.0479176	0.248436	0.19536	0.393111	0.293859	0.312055	0.394653	0.422889	0.530956
YNL137C	NAM9	843	0.21545	0.07047	0.136527	0.152249	0.0412587	0.0474401	0.0742863	0.227014	0.0819524	0.194044	0.17546	0.129735	0.128768	0.212846	0.25084	0.27139	0.261373	0.170663	0.40529
YPL158C	AIM44	844	0.169606	0.0614546	0.138286	0.11828	0.152522	0.0126758	0.0898438	0.285874	0.126344	0.19363	0.181206	0.0504328	0.172356	0.0885046	0.0706764	0.15059	0.0672591	0.189754	0.195253
YLR244C	MAP1	845	0.110634	0.127628	0.0910806	0.256191	0.0689225	0.0518424	0.210761	0.183727	0.16182	0.159281	0.162703	0.0728805	0.0456842	0.289556	0.407049	0.179572	0.117243	0.310692	0.366391
YPR028W	YOP1	846	0.149999	0.201119	0.190381	0.261651	0.207065	0.122567	0.0554239	0.311514	0.180049	0.301059	0.201015	0.227277	0.158006	0.183071	0.51265	0.331791	0.303822	0.388252	0.501178
YNL084C	END3	847	0.18938	0.0973209	0.217653	0.1798	0.0767993	0.0653559	0.0614846	0.191207	0.101868	0.111891	0.0816401	0.148499	0.348426	0.226172	0.34018	0.268866	0.280177	0.253468	0.199149
YGR270W	YTA7	848	0.191204	0.0626316	0.164781	0.203861	0.0486205	0.0379657	0.0606815	0.220408	0.0986924	0.18049	0.21105	0.164038	0.149224	0.108456	0.207231	0.225007	0.172605	0.130628	0.280618
YOL081W	IRA2	849	0.238387	0.0969368	0.132305	0.222373	0.0302377	0.0543835	0.0398651	0.125675	0.13139	0.193965	0.212462	0.105346	0.0795858	0.168595	0.271943	0.315871	0.274555	0.243977	0.430668
YDR074W	TPS2	850	0.120662	0.0650386	0.0713193	0.207337	0.16542	0.0991146	0.143322	0.257671	0.199159	0.295061	0.165821	0.125544	0.195865	0.283145	0.781724	0.263215	0.841289	0.34519	0.473443
YBL051C	PIN4	851	0.193437	0.117372	0.194851	0.186272	0.0935088	0.00962101	0.123171	0.196398	0.190826	0.133833	0.165226	0.240651	0.11329	0.15864	0.144946	0.12444	0.147583	0.186425	0.254798
YGL137W	SEC27	852	0.157178	0.128904	0.127363	0.0941837	0.0508229	0.051351	0.0163894	0.063602	0.195648	0.180456	0.141297	0.128503	0.179871	0.22148	0.16208	0.31809	0.239366	0.132407	0.390747
YBL047C	EDE1	853	0.177261	0.0343707	0.173315	0.285026	0.0627882	0.0392613	0.0255207	0.197887	0.128347	0.123522	0.142478	0.198834	0.211847	0.0808234	0.0458204	0.118908	0.0692903	0.0477468	0.17367
YLR196W	PWP1	854	0.183057	0.18994	0.2494	0.215497	0.0980896	0.0786651	0.171936	0.146965	0.15445	0.00128788	0.0862013	0.136273	0.1329	0.320345	0.635666	0.424154	0.563605	0.407872	0.576181
YDL195W	SEC31	855	0.150001	0.148891	0.113117	0.191078	0.0221943	0.0663697	0.0356895	0.125428	0.151689	0.140073	0.160891	0.212752	0.158835	0.13642	0.0841	0.175791	0.0639342	0.0843704	0.30228
YGL252C	RTG2	856	0.210178	0.0555936	0.150355	0.198586	0.0429017	0.0464133	0.0420043	0.125741	0.135946	0.125224	0.12354	0.137637	0.223831	0.211374	0.296223	0.260059	0.367755	0.228266	0.39282
YKR066C	CCP1	857	0.18732	0.170529	0.11244	0.297615	0.00551172	0.171883	0.0332444	0.0180486	0.27396	0.105306	0.0704713	0.0946673	0.126783	0.112734	0.336018	0.152051	0.114261	0.00471357	0.0871682
YHR208W	BAT1	858	0.175153	0.171477	0.066847	0.126828	0.0907341	0.052707	0.167403	0.112405	0.198673	0.0838887	0.0998397	0.0186307	0.0258399	0.415417	0.514034	0.325799	0.346108	0.388498	0.423301
YNL307C	MCK1	859	0.157188	0.0387801	0.138938	0.161641	0.026836	0.11413	0.00730253	0.237879	0.184212	0.136069	0.207783	0.146264	0.297554	0.159997	0.278589	0.183651	0.261239	0.251912	0.379783
YIR017C	MET28	860	0.26398	0.100846	0.670145	0.645082	0.105055	0.121376	0.609544	0.421057	0.123958	0.236102	0.204801	0.0110462	0.120223	0.073671	0.392232	0.150784	0.108878	0.230686	0.0267576
YPL126W	NAN1	861	0.152268	0.120224	0.193337	0.169317	0.0678305	0.0906752	0.193805	0.00422998	0.0963784	0.0516	0.138495	0.144119	0.0787152	0.357286	0.683388	0.435938	0.459839	0.402869	0.639124
YDR529C	QCR7	862	0.207731	0.127622	0.117948	0.249141	0.16888	0.092623	0.00693202	0.206574	0.0882583	0.303585	0.0700572	0.0666445	0.106229	0.0970003	0.0115329	0.0499021	0.213552	0.180031	0.117639
YDL134C	PPH21	863	0.161004	0.125605	0.105084	0.278874	0.032073	0.0690826	0.0517325	0.191748	0.109514	0.2572	0.187432	0.12485	0.29307	0.223841	0.34542	0.275805	0.117876	0.178711	0.466673
YLR025W	SNF7	864	0.160834	0.14303	0.230928	0.173754	0.105419	0.0886224	0.0805881	0.169228	0.0838216	0.093163	0.102364	0.0892977	0.217667	0.153216	0.0128475	0.184993	0.298992	0.176969	0.129238
YDL136W	RPL35B	865	0.214922	0.0614004	0.271595	0.358382	0.0374761	0.108214	0.133475	0.332791	0.0569148	0.107147	0.0954013	0.0965125	0.337825	0.35413	0.316539	0.371567	0.205506	0.335815	0.686616
YDR168W	CDC37	866	0.180794	0.146421	0.217654	0.174642	0.0330145	0.0850775	0.0685558	0.299366	0.0518891	0.122064	0.173571	0.0492156	0.24554	0.286559	0.235202	0.356041	0.447769	0.320662	0.441852
YJR076C	CDC11	867	0.170703	0.130968	0.263005	0.273958	0.0901258	0.0607398	0.10524	0.00532496	0.0885703	0.11853	0.101649	0.123446	0.264881	0.231744	0.40854	0.19001	0.422421	0.352709	0.476689
YDR025W	RPS11A	868	0.0723216	0.0681671	0.238331	0.096161	0.0673672	0.18639	0.216164	0.238652	0.137757	0.109617	0.105521	0.0615936	0.193346	0.278768	0.138731	0.0514598	0.250203	0.424831	0.652809
YOR194C	TOA1	869	0.171862	0.144637	0.224932	0.19993	0.146881	0.0953759	0.123285	0.16345	0.193417	0.217506	0.167126	0.0954504	0.23979	0.075848	0.157463	0.165086	0.124741	0.172435	0.266898
YMR311C	GLC8	870	0.200717	0.215333	0.32509	0.312891	0.110516	0.0491149	0.16058	0.213231	0.0792993	0.126325	0.0950771	0.0350623	0.328973	0.0752207	0.0173126	0.00943479	0.50903	0.0437707	0.11501
YGR187C	HGH1	871	0.111716	0.0531455	0.18523	0.129402	0.0869216	0.129285	0.167238	0.216036	0.269003	0.258536	0.0877148	0.169621	0.232375	0.376429	0.560838	0.480606	0.373176	0.431903	0.592115
YOR014W	RTS1	872	0.13982	0.00840086	0.14373	0.210766	0.0133776	0.0228226	0.0337443	0.241372	0.0264819	0.227499	0.153354	0.238626	0.123432	0.102133	0.162731	0.209921	0.0836626	0.0981423	0.334619
YHR089C	GAR1	873	0.210332	0.180871	0.162689	0.184907	0.0259743	0.119486	0.131888	0.109167	0.139227	0.0133091	0.104932	0.0914146	0.0858827	0.37916	0.496595	0.364975	0.551776	0.37898	0.517455
YLR406C	RPL31B	874	0.222255	0.165628	0.162021	0.208254	0.0759405	0.063084	0.0696875	0.220638	0.0832668	0.0865954	0.103292	0.0778406	0.291962	0.439885	0.552918	0.424729	0.423273	0.508567	0.65249
YPL235W	RVB2	875	0.169372	0.114387	0.135802	0.161989	0.06787	0.0667039	0.119254	0.146137	0.203047	0.140452	0.089069	0.105372	0.322257	0.226603	0.356421	0.362063	0.278764	0.202729	0.323409
YLR399C	BDF1	876	0.172379	0.0559732	0.137156	0.203879	0.0413434	0.0789383	0.00619217	0.182729	0.00666255	0.104583	0.121454	0.131387	0.212527	0.19184	0.0653031	0.162085	0.010295	0.114143	0.234137
YPL169C	MEX67	877	0.229724	0.0970171	0.194599	0.22985	0.0705251	0.0308613	0.143243	0.140821	0.126019	0.158283	0.20436	0.103056	0.0928095	0.221949	0.382695	0.314238	0.165992	0.304073	0.429755
YBR221C	PDB1	878	0.186446	0.0587707	0.0974784	0.0914398	0.0833908	0.028266	0.0190517	0.151522	0.0955741	0.179846	0.0849488	0.0784399	0.164537	0.169028	0.0820688	0.212159	0.0594611	0.19593	0.293804
YMR195W	ICY1	879	0.339382	0.506578	0.192223	0.622746	0.119653	0.0597963	0.272334	0.240259	0.142271	0.158985	0.16476	0.118177	0.150339	0.266299	0.309016	0.512815	0.522552	0.102712	0.188059
YMR266W	RSN1	880	0.125296	0.0583554	0.1096	0.172069	0.0524186	0.00822038	0.0751201	0.103389	0.0782949	0.0105882	0.0886078	0.201677	0.186463	0.286723	0.317677	0.330895	0.347216	0.325831	0.457187
YFR001W	LOC1	881	0.212061	0.086821	0.206882	0.295003	0.0481759	0.141963	0.153045	0.0380749	0.0995131	0.0613775	0.0746536	0.0381157	0.290646	0.501755	0.76414	0.430832	0.429733	0.575213	0.582235
YBL079W	NUP170	882	0.17789	0.0683849	0.114952	0.172683	0.0222913	0.0593576	0.128203	0.22633	0.069305	0.0884395	0.199443	0.105956	0.144009	0.192335	0.419606	0.355597	0.279998	0.30609	0.545362
YDL031W	DBP10	883	0.147896	0.137149	0.232445	0.212274	0.111755	0.0892458	0.173414	0.136239	0.121626	0.0801934	0.180774	0.115925	0.109527	0.356132	0.661002	0.513321	0.555715	0.392344	0.634079
YLR387C	REH1	884	0.241002	0.17269	0.184173	0.222553	0.0455109	0.107152	0.222734	0.0564216	0.0840891	0.161768	0.0613567	0.16495	0.0420321	0.296525	0.428512	0.471885	0.137939	0.241095	0.301908
YFR030W	MET10	885	0.186077	0.0980799	0.296458	0.249717	0.0262892	0.0663337	0.524162	0.56751	0.142386	0.194294	0.1326	0.263401	0.145411	0.0104208	0.259125	0.0680988	0.0551833	0.080008	0.0834929
YBR191W	RPL21A	886	0.104946	0.154235	0.154077	0.241605	0.0456706	0.0352622	0.13947	0.0223259	0.0948074	0.0449914	0.080503	0.0616055	0.295823	0.438641	0.349021	0.407924	0.430723	0.478455	0.715205
YLR449W	FPR4	887	0.227412	0.0500439	0.367897	0.250706	0.139272	0.0783502	0.299678	0.135154	0.250957	0.00216132	0.0993092	0.114608	0.0509082	0.385566	0.430315	0.365292	0.367843	0.371161	0.518132
YGR281W	YOR1	888	0.0440572	0.0663432	0.0657098	0.133736	0.0333067	0.070299	0.108638	0.16171	0.0621821	0.0407525	0.158887	0.19531	0.0585555	0.050342	0.162147	0.120677	0.134476	0.0246346	0.127868
YDR404C	RPB7	889	0.20297	0.0995461	0.118095	0.22279	0.161298	0.166441	0.013527	0.0471907	0.220888	0.078882	0.0279999	0.0313462	0.418335	0.356159	0.290964	0.371062	0.479577	0.395201	0.438911
YPL063W	TIM50	890	0.152841	0.143039	0.132467	0.14128	0.0398163	0.0582257	0.076753	0.0523046	0.122503	0.141135	0.0874848	0.0886598	0.134229	0.205895	0.269218	0.179276	0.11311	0.10814	0.377076
YML108W	YML108W	891	0.206174	0.171917	0.300872	0.219083	0.0313979	0.205853	0.216514	0.0752378	0.152507	0.0298756	0.141988	0.140511	0.199594	0.353987	0.98633	0.791828	0.673174	0.546744	0.747425
YHR205W	SCH9	892	0.157397	0.0588097	0.154347	0.20906	0.0481794	0.0251422	0.102006	0.184636	0.0782112	0.127778	0.163122	0.143905	0.0971982	0.221239	0.296182	0.219056	0.17593	0.217626	0.45234
YDL153C	SAS10	893	0.258857	0.129922	0.296805	0.171169	0.141474	0.168869	0.233703	0.0653937	0.136884	0.106485	0.218907	0.149243	0.230726	0.366505	0.684035	0.443177	0.581478	0.407992	0.600567
YLR452C	SST2	894	0.173305	0.0845067	0.244338	0.231561	0.0948041	0.0439286	0.139209	0.130297	0.0449483	0.224324	0.177299	0.170624	0.357892	0.226079	0.380516	0.4093	0.477697	0.304584	0.423029
YJL158C	CIS3	895	0.166108	0.0297495	0.145469	0.0299854	0.13574	0.163263	0.0291842	0.0941745	0.23071	0.217597	0.0295832	0.183167	0.351731	0.180946	0.0912178	0.0944716	0.081605	0.23384	0.291741
YLL018C	DPS1	896	0.149682	0.131087	0.0865178	0.135342	0.076431	0.0515456	0.128017	0.0764551	0.126506	0.132403	0.0872978	0.109387	0.04721	0.0899591	0.102825	0.0567721	0.0359319	0.074743	0.115458
YDR069C	DOA4	897	0.133111	0.0849061	0.100336	0.193378	0.0520974	0.0698464	0.0952997	0.201271	0.024241	0.181114	0.222563	0.177399	0.112178	0.0385851	0.0765331	0.180756	0.0169448	0.0661772	0.14782
YBR039W	ATP3	898	0.189039	0.137861	0.23485	0.259892	0.0171855	0.0869452	0.0468846	0.30476	0.0931862	0.324333	0.108707	0.106553	0.227968	0.149387	0.227143	0.265675	0.138392	0.180423	0.376176
YGL167C	PMR1	899	0.147154	0.0354367	0.0929177	0.247941	0.0490835	0.032427	0.0692154	0.270842	0.0902503	0.186632	0.163265	0.153783	0.0475923	0.195647	0.302363	0.292528	0.265341	0.258896	0.424177
YHR068W	DYS1	900	0.161312	0.0981245	0.202972	0.176721	0.0673489	0.117645	0.0496247	0.152953	0.139112	0.0782417	0.121493	0.141104	0.269914	0.312474	0.371877	0.261225	0.387208	0.315711	0.57112
YBR207W	FTH1	901	0.114551	0.107187	0.205117	0.279799	0.0299844	0.0145987	0.0498146	0.0920227	0.106899	0.163114	0.170685	0.196715	0.0799065	0.242302	0.340548	0.33319	0.439921	0.38929	0.54484
YER125W	RSP5	902	0.172867	0.073258	0.113915	0.174816	0.0708635	0.0709113	0.0302923	0.200481	0.0746931	0.139086	0.116933	0.25604	0.0862926	0.0620367	0.0371576	0.223717	0.182257	0.0775013	0.352565
YDR303C	RSC3	903	0.138572	0.0848456	0.127044	0.232728	0.0324206	0.0660103	0.0370472	0.211638	0.0956284	0.277233	0.137706	0.19527	0.228671	0.164152	0.425218	0.266456	0.374142	0.293692	0.455157
YGL092W	NUP145	904	0.147871	0.0684354	0.107828	0.157851	0.0271476	0.0614089	0.0488457	0.143231	0.0493809	0.143177	0.158165	0.152747	0.0685779	0.198105	0.288505	0.28114	0.221076	0.216294	0.529923
YJL123C	MTC1	905	0.225597	0.136603	0.184489	0.185159	0.119534	0.0652235	0.132413	0.182856	0.216352	0.08513	0.155638	0.11464	0.1644	0.283575	0.0804465	0.242547	0.0146676	0.217315	0.424683
YOL097C	WRS1	906	0.173652	0.117904	0.162445	0.166756	0.085258	0.0392282	0.0662408	0.11002	0.0844559	0.0249336	0.177933	0.094826	0.207343	0.26007	0.387381	0.330937	0.245149	0.319426	0.549005
YOR362C	PRE10	907	0.182894	0.147991	0.181771	0.243613	0.0767237	0.0954277	0.0212092	0.111802	0.219512	0.0934088	0.103437	0.107689	0.215739	0.285994	0.229661	0.10316	0.359927	0.290929	0.42651
YKL007W	CAP1	908	0.214221	0.162842	0.184087	0.198998	0.098602	0.108664	0.0917899	0.163325	0.0947322	0.0693221	0.101522	0.0454575	0.243982	0.240089	0.116226	0.238308	0.45524	0.20551	0.218195
YHR066W	SSF1	909	0.189692	0.152947	0.316043	0.206027	0.241946	0.138118	0.351005	0.183933	0.250228	0.0450404	0.107159	0.129921	0.219084	0.415993	0.723946	0.402547	0.629859	0.43799	0.670771
YGR119C	NUP57	910	0.176641	0.122894	0.169467	0.159141	0.0793829	0.0650581	0.183481	0.177352	0.108763	0.141426	0.17664	0.0539412	0.152034	0.231639	0.291773	0.188163	0.316677	0.215238	0.271489
YDR324C	UTP4	911	0.181518	0.070768	0.257147	0.160823	0.0799108	0.119418	0.189346	0.198375	0.139952	0.139695	0.158193	0.131313	0.166897	0.405999	0.727728	0.4325	0.600071	0.468801	0.731317
YGL202W	ARO8	912	0.077762	0.0692863	0.0654507	0.155072	0.0328343	0.0610192	0.0124865	0.059999	0.119489	0.168453	0.0836516	0.116308	0.0669706	0.110428	0.133005	0.0236091	0.103911	0.0260244	0.132613
YDR322C-A	TIM11	913	0.141886	0.0996184	0.20722	0.400543	0.142813	0.017525	0.130213	0.114352	0.195352	0.219945	0.0653514	0.0492608	0.237699	0.11155	0.116551	0.141	0.142046	0.367353	0.188267
YKL195W	MIA40	914	0.229543	0.132546	0.268134	0.242279	0.0998205	0.0338119	0.0889132	0.118159	0.03042	0.0678294	0.0754932	0.0597528	0.184661	0.147567	0.276727	0.187892	0.0498548	0.217279	0.262346
YDR052C	DBF4	915	0.15801	0.115897	0.218068	0.2753	0.137805	0.0425131	0.215683	0.141618	0.101042	0.167574	0.237152	0.110113	0.138942	0.200543	0.368617	0.196254	0.230384	0.12461	0.354344
YDR245W	MNN10	916	0.140773	0.129182	0.124709	0.223555	0.0334253	0.102579	0.0903031	0.167542	0.196406	0.123388	0.138254	0.0438992	0.207485	0.308142	0.40779	0.371351	0.361943	0.41606	0.446014
YML008C	ERG6	917	0.254121	0.195494	0.220656	0.196721	0.0738133	0.0798322	0.0534348	0.126384	0.149732	0.249862	0.0455397	0.198728	0.232318	0.389514	0.397241	0.527622	0.436526	0.349223	0.675996
YMR083W	ADH3	918	0.0838172	0.152273	0.0837827	0.157682	0.0788101	0.0439555	0.0771951	0.018509	0.235036	0.00931323	0.104592	0.0429374	0.0484504	0.301755	0.20203	0.304756	0.420566	0.325752	0.292301
YBR172C	SMY2	919	0.190397	0.0709454	0.209512	0.132013	0.187991	0.0604601	0.212883	0.167542	0.131324	0.0771813	0.177482	0.123671	0.00928042	0.27995	0.224825	0.298462	0.229161	0.235901	0.357335
YJR137C	MET5	920	0.15389	0.0801656	0.198437	0.189676	0.0298258	0.10395	0.506971	0.726418	0.117529	0.106761	0.161611	0.197308	0.147598	0.0919156	0.110388	0.148505	0.0274391	0.213291	0.182487
YML053C	YML053C	921	0.156606	0.0443154	0.419992	0.353137	0.246724	0.0986132	0.212164	0.261851	0.104681	0.172398	0.140263	0.0908168	0.311749	0.236813	0.497177	0.10526	0.161828	0.0584105	0.350761
YDL100C	GET3	922	0.191275	0.15026	0.224367	0.284134	0.0521494	0.0866221	0.00926837	0.126851	0.106927	0.246253	0.155189	0.18749	0.225598	0.161175	0.115651	0.288921	0.239261	0.331703	0.582044
YLR208W	SEC13	923	0.139813	0.122662	0.0578438	0.188605	0.137796	0.122474	0.0106467	0.351086	0.239326	0.0404231	0.0933604	0.112898	0.229682	0.357613	0.306337	0.315534	0.323709	0.353468	0.23092
YDR145W	TAF12	924	0.193513	0.0715391	0.244029	0.255959	0.129947	0.0667738	0.235526	0.141367	0.126576	0.209597	0.14806	0.117842	0.135045	0.188479	0.340548	0.264668	0.387916	0.225103	0.318137
YDR412W	RRP17	925	0.246829	0.0306862	0.291118	0.213898	0.188852	0.121765	0.152376	0.212614	0.253417	0.0599829	0.0922722	0.0510715	0.203002	0.295851	0.528061	0.294869	0.471418	0.290782	0.420948
YHR098C	SFB3	926	0.132862	0.0764725	0.132758	0.176125	0.0482929	0.0430469	0.0618338	0.167803	0.113322	0.212882	0.123737	0.145434	0.278756	0.171765	0.226216	0.202321	0.263014	0.281293	0.467925
YGR284C	ERV29	927	0.174037	0.0786247	0.0992354	0.252516	0.105469	0.0391265	0.052817	0.140474	0.0894216	0.328706	0.204598	0.0556608	0.163482	0.20575	0.291855	0.407296	0.63415	0.384324	0.618511
YML117W	NAB6	928	0.173517	0.0796798	0.0753609	0.199502	0.069994	0.0512524	0.0350313	0.0945416	0.141771	0.159825	0.159172	0.152387	0.150894	0.0634432	0.0605733	0.134062	0.0473279	0.0527642	0.193635
YIL109C	SEC24	929	0.146839	0.0434211	0.1208	0.180135	0.00931089	0.0896064	0.122294	0.0701172	0.153249	0.258223	0.164669	0.15048	0.137186	0.115481	0.129271	0.168632	0.17638	0.198282	0.483869
YOR182C	RPS30B	930	0.182675	0.217486	0.166483	0.24554	0.00971593	0.0420435	0.0964329	0.03154	0.0179032	0.0927385	0.161311	0.0547244	0.237781	0.461778	0.619465	0.54383	0.456988	0.541599	0.831509
YML072C	TCB3	931	0.142495	0.0620759	0.134081	0.229169	0.0168873	0.0706435	0.0735969	0.129433	0.156647	0.207258	0.16232	0.145612	0.140621	0.131337	0.170278	0.194633	0.136093	0.118245	0.393299
YDL205C	HEM3	932	0.148098	0.117178	0.0946388	0.131563	0.0464197	0.0640506	0.115705	0.0910555	0.0928713	0.0196325	0.104067	0.0507014	0.142987	0.278331	0.172439	0.338413	0.242025	0.367901	0.25306
YDR208W	MSS4	933	0.114474	0.0856614	0.156052	0.248662	0.0843603	0.0780792	0.157465	0.228258	0.105532	0.12971	0.127133	0.205994	0.148774	0.167832	0.311524	0.187147	0.215228	0.192512	0.40846
YLR403W	SFP1	934	0.0754675	0.0721451	0.175823	0.246792	0.133063	0.0769019	0.126291	0.172165	0.0408585	0.209672	0.124092	0.193708	0.0274881	0.168479	0.268804	0.205385	0.214816	0.191941	0.441618
YNL302C	RPS19B	935	0.118466	0.191596	0.106428	0.0972285	0.0206978	0.0839423	0.12597	0.084408	0.11553	0.0210575	0.0372301	0.0324036	0.232964	0.362489	0.444813	0.302468	0.441852	0.442723	0.752337
YOR058C	ASE1	936	0.159046	0.0575438	0.120259	0.204799	0.0657983	0.0293297	0.0832123	0.151891	0.236379	0.119592	0.190596	0.119003	0.196486	0.24784	0.339747	0.391661	0.359189	0.327876	0.416026
YDR251W	PAM1	937	0.144169	0.112579	0.144671	0.199349	0.0618717	0.0411601	0.0193089	0.288149	0.0774483	0.197432	0.151495	0.196066	0.221187	0.0615642	0.0986631	0.204683	0.0639616	0.00613726	0.141849
YDR361C	BCP1	938	0.211328	0.122525	0.206971	0.201245	0.0156992	0.0911302	0.301181	0.300267	0.0591403	0.128267	0.13811	0.132815	0.168597	0.375982	0.754624	0.360795	0.485705	0.469217	0.808624
YDR170C	SEC7	939	0.18832	0.0565111	0.118967	0.185383	0.0281747	0.0229065	0.0276216	0.209155	0.0986316	0.213894	0.227444	0.123701	0.0926385	0.184992	0.144639	0.266017	0.188639	0.194141	0.387187
YHR023W	MYO1	940	0.206106	0.0468952	0.208685	0.206113	0.0680638	0.0743157	0.102223	0.271897	0.094053	0.125334	0.191296	0.0814069	0.215192	0.242766	0.370006	0.38048	0.410005	0.195627	0.477094
YPL218W	SAR1	941	0.160498	0.0974905	0.144701	0.183032	0.175415	0.118346	0.109768	0.220253	0.147756	0.198829	0.0580998	0.121413	0.298489	0.352035	0.414801	0.397282	0.374592	0.483898	0.620455
YLR309C	IMH1	942	0.190664	0.116621	0.262648	0.294794	0.0960135	0.0820139	0.0791952	0.19439	0.217462	0.231999	0.216286	0.202324	0.198726	0.251076	0.241535	0.375939	0.341349	0.19583	0.423617
YHR010W	RPL27A	943	0.100111	0.17103	0.245653	0.222419	0.0215424	0.0155562	0.0369933	0.0672661	0.194784	0.103005	0.145278	0.081472	0.125515	0.42224	0.396136	0.407154	0.369876	0.47559	0.898755
YJR073C	OPI3	944	0.2526	0.112077	0.187143	0.2526	0.09247	0.27683	0.460782	0.585469	0.326744	0.155754	0.0515709	0.375348	0.650842	0.258806	0.843989	0.294869	0.181407	0.0719501	0.198653
YLR192C	HCR1	945	0.227092	0.0854037	0.179953	0.238452	0.0861221	0.0951671	0.0908445	0.0616004	0.264989	0.140401	0.158534	0.075799	0.191481	0.208462	0.105209	0.18587	0.0863264	0.308948	0.428078
YDL004W	ATP16	946	0.118766	0.1705	0.23485	0.190939	0.076883	0.109496	0.266138	0.00134333	0.0806187	0.0886268	0.167932	0.174632	0.397304	0.13016	0.210662	0.185963	0.140609	0.311507	0.47268
YJR002W	MPP10	947	0.166264	0.110085	0.213332	0.150521	0.088155	0.135888	0.121879	0.167929	0.125708	0.113456	0.161706	0.0936887	0.156756	0.326801	0.632807	0.423189	0.503255	0.292547	0.601189
YMR033W	ARP9	948	0.157061	0.103828	0.172591	0.234885	0.0549779	0.0136617	0.10551	0.189421	0.196082	0.151064	0.0843389	0.175244	0.145645	0.220504	0.271584	0.299722	0.308838	0.262933	0.428113
YNL247W	YNL247W	949	0.172157	0.129829	0.208904	0.209759	0.052026	0.0744379	0.21049	0.174537	0.123857	0.108829	0.147562	0.17547	0.0544673	0.239593	0.291236	0.310974	0.285808	0.296802	0.486351
YOR047C	STD1	950	0.125478	0.138097	0.223802	0.248781	0.15807	0.121403	0.127955	0.215256	0.123473	0.0549224	0.108124	0.131666	0.103443	0.138846	0.283341	0.283693	0.18193	0.224828	0.440931
YGL026C	TRP5	951	0.117318	0.0617244	0.0835219	0.100865	0.0359666	0.132596	0.0359441	0.0304458	0.25804	0.143622	0.115186	0.138229	0.0427561	0.0786607	0.174103	0.0321326	0.129947	0.0794847	0.0660368
YCR002C	CDC10	952	0.0893372	0.161196	0.0854051	0.206511	0.0738952	0.0599722	0.00394746	0.248295	0.172629	0.122473	0.0583528	0.0886929	0.314826	0.240414	0.338467	0.35133	0.252291	0.334671	0.475938
YLR435W	TSR2	953	0.245671	0.109699	0.252501	0.207643	0.0426322	0.163094	0.381701	0.473606	0.35636	0.0810858	0.113456	0.116406	0.103145	0.398841	0.637201	0.567837	0.60566	0.387189	0.631462
YGR189C	CRH1	954	0.18562	0.0995038	0.126381	0.1584	0.0164142	0.178854	0.114688	0.270527	0.161201	0.182436	0.0851483	0.104017	0.146436	0.167434	0.069177	0.0101135	0.0820477	0.213712	0.239514
YDL015C	TSC13	955	0.132388	0.0454495	0.135791	0.0678711	0.107022	0.00969067	0.101436	0.199453	0.176992	0.162814	0.145488	0.110047	0.0921871	0.278134	0.40729	0.45722	0.519144	0.500756	0.566039
YDR457W	TOM1	956	0.185306	0.0522786	0.0924953	0.175594	0.052208	0.0456104	0.00531229	0.205742	0.109272	0.165314	0.163548	0.0749308	0.18912	0.227665	0.274413	0.299157	0.295625	0.202875	0.473032
YKL135C	APL2	957	0.183664	0.0679543	0.254291	0.253401	0.0861272	0.0394523	0.212621	0.188259	0.163389	0.218901	0.155151	0.180765	0.176808	0.190717	0.353865	0.291703	0.204298	0.259218	0.500099
YKL142W	MRP8	958	0.175704	0.119178	0.174141	0.209573	0.110568	0.0287648	0.111468	0.119993	0.107311	0.121277	0.0401622	0.0686999	0.344631	0.144636	0.0420091	0.417173	0.222567	0.0476926	0.290125
YJR065C	ARP3	959	0.138686	0.0997348	0.162227	0.261867	0.117513	0.0905137	0.0459052	0.108703	0.142247	0.237753	0.140714	0.231573	0.17743	0.107755	0.0719144	0.141726	0.0576239	0.13368	0.319441
YKL086W	SRX1	960	0.234888	0.204989	0.15615	0.405676	0.245406	0.245169	0.226824	0.288036	0.231309	0.202963	0.0937188	0.235271	0.302479	0.0325297	0.0719276	0.248483	0.34223	0.0200401	0.139804
YDL051W	LHP1	961	0.136824	0.109506	0.215881	0.250513	0.0515644	0.0920789	0.172171	0.0108937	0.157572	0.0449503	0.178275	0.0633395	0.273045	0.486902	0.520697	0.461806	0.407743	0.585544	0.673186
YLR129W	DIP2	962	0.148444	0.143101	0.148909	0.112391	0.0449702	0.0252847	0.20382	0.0837559	0.12338	0.120086	0.118309	0.144686	0.12279	0.394958	0.597647	0.488645	0.514036	0.346456	0.629506
YKL014C	URB1	963	0.143841	0.112586	0.182135	0.180741	0.0689347	0.12497	0.203857	0.28272	0.0853085	0.144425	0.183544	0.0970602	0.0680239	0.355093	0.678186	0.469148	0.508409	0.411707	0.689807
YJL039C	NUP192	964	0.182763	0.0766986	0.0903262	0.190604	0.0394322	0.0544195	0.0354903	0.146002	0.0816496	0.201283	0.171112	0.123841	0.193093	0.27162	0.406431	0.394436	0.3769	0.278886	0.589693
YJL122W	ALB1	965	0.136802	0.146359	0.27845	0.323153	0.104872	0.119368	0.297444	0.110026	0.218266	0.0969341	0.0508009	0.0885236	0.319541	0.605394	0.794512	0.330272	0.727734	0.538238	0.608326
YGL070C	RPB9	966	0.16715	0.0963492	0.101412	0.211206	0.0777755	0.10469	0.152483	0.0396119	0.0995092	0.109707	0.0426608	0.130741	0.243253	0.600092	0.481851	0.382764	0.699411	0.296679	0.694332
YLL051C	FRE6	967	0.10938	0.08323	0.111301	0.227289	0.0930734	0.0353361	0.0860576	0.0256656	0.0990037	0.131694	0.14224	0.189266	0.123131	0.197685	0.40729	0.311204	0.283889	0.317246	0.535141
YER180C-A	SLO1	968	0.256844	0.231092	0.121081	0.174808	0.141713	0.0150052	0.100199	0.241145	0.203416	0.0357572	0.172232	0.160233	0.105985	0.291996	0.400991	0.447286	0.502106	0.480702	0.770144
YER042W	MXR1	969	0.306675	0.360061	0.600304	0.666863	0.0619668	0.0983652	0.507458	0.465358	0.270983	0.398477	0.11565	0.155781	0.087443	0.332101	0.0590267	0.294869	0.513669	0.461594	0.321585
YDL161W	ENT1	970	0.169513	0.129067	0.25188	0.327092	0.226672	0.0343533	0.160091	0.226098	0.056939	0.113429	0.125731	0.13285	0.171249	0.177879	0.116414	0.187776	0.245659	0.116193	0.267358
YKL077W	YKL077W	971	0.139175	0.120167	0.0946324	0.185351	0.0433292	0.0463016	0.0634152	0.171158	0.15086	0.107512	0.140541	0.235036	0.123672	0.329621	0.376166	0.312065	0.459944	0.287184	0.494222
YLR170C	APS1	972	0.275166	0.0675685	0.22692	0.20384	0.0394683	0.0200053	0.0646898	0.104382	0.199065	0.185417	0.166971	0.0751733	0.159904	0.281146	0.250285	0.0777015	0.255495	0.218431	0.482245
YMR216C	SKY1	973	0.137629	0.0989317	0.0490559	0.0969019	0.0228605	0.0756249	0.0919988	0.123852	0.0568367	0.135664	0.132359	0.111175	0.0732007	0.21217	0.339616	0.26401	0.19351	0.252634	0.501807
YLR223C	IFH1	974	0.205847	0.0551721	0.237605	0.193453	0.192702	0.0668412	0.268	0.263277	0.186916	0.0849094	0.21924	0.172592	0.0693211	0.217004	0.476554	0.293856	0.297874	0.291563	0.497376
YNL271C	BNI1	975	0.192622	0.0313515	0.110008	0.17441	0.0422038	0.011777	0.0520771	0.232914	0.0549941	0.14225	0.137633	0.0890883	0.151569	0.18486	0.194191	0.272966	0.17685	0.164861	0.404767
YGL225W	VRG4	976	0.107337	0.0681224	0.0992978	0.0691362	0.0971927	0.153877	0.181022	0.23534	0.129447	0.258008	0.0454838	0.211241	0.31502	0.162348	0.454991	0.328472	0.442568	0.367729	0.414173
YLR206W	ENT2	977	0.200597	0.0368331	0.280288	0.274927	0.143701	0.0286191	0.152363	0.153463	0.136628	0.170289	0.157237	0.058076	0.0714901	0.111881	0.0667144	0.0853251	0.170939	0.00759379	0.0214124
YER117W	RPL23B	978	0.201339	0.144143	0.10672	0.134409	0.113565	0.0992688	0.0718327	0.146941	0.168858	0.0675989	0.03322	0.0859872	0.202533	0.434482	0.358279	0.525738	0.551229	0.576917	0.796374
YNR035C	ARC35	979	0.131815	0.0698859	0.210369	0.234862	0.0435041	0.0661169	0.0919068	0.175002	0.108619	0.239416	0.0253751	0.150008	0.138276	0.110304	0.418578	0.103534	0.229161	0.2527	0.285517
YGL117W	YGL117W	980	0.0633066	0.182347	0.196724	0.131069	0.0489585	0.110374	0.16766	0.0632452	0.252634	0.160791	0.0492149	0.133122	0.160987	0.256984	0.395396	0.340856	0.375167	0.517179	0.556971
YOR187W	TUF1	981	0.0583938	0.0474293	0.102359	0.159651	0.0871268	0.08903	0.0992995	0.220534	0.159823	0.245657	0.102974	0.221692	0.197309	0.220481	0.258268	0.184285	0.216496	0.270706	0.343382
YMR109W	MYO5	982	0.138266	0.043764	0.125491	0.185691	0.0835244	0.0668362	0.0153403	0.258807	0.071552	0.220458	0.140257	0.147729	0.194047	0.102435	0.197242	0.241231	0.146039	0.0963389	0.360306
YNL213C	RRG9	983	0.189088	0.0564495	0.18997	0.173726	0.0997045	0.0502203	0.103889	0.10479	0.163825	0.107795	0.055759	0.134582	0.295602	0.233408	0.387114	0.2224	0.4597	0.291269	0.330477
YNL055C	POR1	984	0.205417	0.145005	0.16	0.211852	0.0997765	0.116606	0.118511	0.176644	0.100174	0.263974	0.103592	0.106828	0.171992	0.0269532	0.210705	0.0371299	0.363748	0.121496	0.039208
YOL038W	PRE6	985	0.321655	0.183744	0.281698	0.197276	0.0969108	0.0519667	0.0567517	0.214446	0.136563	0.042113	0.0382512	0.0292141	0.134555	0.214891	0.20293	0.278724	0.0281129	0.230784	0.422297
YER161C	SPT2	986	0.186713	0.197331	0.212833	0.171217	0.0706993	0.0709754	0.166944	0.10446	0.179257	0.249324	0.0840707	0.189395	0.177796	0.290575	0.218167	0.231335	0.293134	0.183159	0.440853
YJL179W	PFD1	987	0.24046	0.164699	0.262344	0.277993	0.151093	0.186145	0.178514	0.31277	0.109865	0.0677868	0.119617	0.117721	0.247307	0.320677	0.421118	0.161263	0.74385	0.41409	0.607648
YLR225C	YLR225C	988	0.166399	0.0481172	0.16304	0.167265	0.0429523	0.0451808	0.0268968	0.168574	0.0300197	0.169403	0.077182	0.0651511	0.391098	0.177193	0.219899	0.186902	0.270948	0.233932	0.28288
YLL048C	YBT1	989	0.153888	0.0460461	0.0526768	0.142527	0.0579321	0.0743212	0.0204791	0.15817	0.124663	0.13515	0.152944	0.173543	0.11479	0.140675	0.233569	0.288102	0.230539	0.153302	0.349546
YDR300C	PRO1	990	0.162897	0.102495	0.22116	0.30489	0.0196783	0.0518825	0.123466	0.140331	0.0875826	0.138815	0.066999	0.185786	0.0879356	0.311909	0.49047	0.377973	0.41027	0.384661	0.588165
YPR133C	SPN1	991	0.213687	0.0283222	0.27621	0.173834	0.0980026	0.0123658	0.144884	0.145695	0.21413	0.0707348	0.0857347	0.0957014	0.121182	0.274819	0.26419	0.357631	0.271101	0.232675	0.375762
YHL047C	ARN2	992	0.317748	0.0391993	0.148682	0.268727	0.0668126	0.0770109	0.0777912	0.0685681	0.195251	0.201127	0.180107	0.142401	0.290147	0.473006	0.444456	0.546532	0.675674	0.45334	0.526619
YML048W	GSF2	993	0.210281	0.133953	0.0874595	0.189234	0.052	0.131419	0.0787828	0.0623347	0.229947	0.151308	0.043722	0.0834279	0.242106	0.333442	0.221206	0.351384	0.326382	0.328351	0.423378
YOL076W	MDM20	994	0.124731	0.111219	0.175711	0.161742	0.0389256	0.108331	0.103306	0.186922	0.0403646	0.161056	0.158273	0.110577	0.237917	0.148487	0.392777	0.350619	0.250245	0.287677	0.481505
YPR173C	VPS4	995	0.0736787	0.0927249	0.133461	0.129021	0.152533	0.0427225	0.024877	0.196606	0.0185115	0.135294	0.124318	0.0940723	0.175962	0.190946	0.0929129	0.234823	0.294861	0.235328	0.448521
YIL128W	MET18	996	0.136878	0.039195	0.173496	0.215788	0.0635333	0.0992777	0.0114845	0.208111	0.0761432	0.178429	0.159041	0.15299	0.101086	0.186032	0.358863	0.300639	0.299896	0.277352	0.517929
YLR378C	SEC61	997	0.150281	0.112804	0.0838515	0.243708	0.0626645	0.133072	0.0872017	0.136625	0.225214	0.216373	0.114423	0.169213	0.138237	0.0731544	0.0352942	0.0204879	0.0542742	0.160713	0.173863
YKR001C	VPS1	998	0.146524	0.0630595	0.132959	0.183797	0.076492	0.0422346	0.0194186	0.192188	0.120127	0.214313	0.182212	0.187528	0.232173	0.10887	0.236218	0.271476	0.171122	0.160172	0.343664
YHR081W	LRP1	999	0.193935	0.0807926	0.305466	0.126445	0.139739	0.0593534	0.153814	0.179716	0.26688	0.0359627	0.0680209	0.130434	0.272974	0.353773	0.253377	0.468943	0.455406	0.361122	0.391792
YNL175C	NOP13	1000	0.128294	0.0851869	0.331848	0.234285	0.21864	0.167128	0.325292	0.3588	0.200834	0.0953231	0.115908	0.0306145	0.105729	0.397105	0.737928	0.388608	0.492029	0.482037	0.73254
YFR009W	GCN20	1001	0.138724	0.101342	0.0833391	0.182434	0.0203415	0.0292762	0.12935	0.189389	0.0799352	0.13899	0.15358	0.169214	0.111049	0.243086	0.323289	0.414112	0.472176	0.261142	0.583453
YDL022W	GPD1	1002	0.122868	0.21566	0.163261	0.110194	0.133648	0.172915	0.213407	0.150862	0.20996	0.09783	0.353847	0.263532	0.13515	0.2086	0.480262	0.40659	0.3828	0.143376	0.317872
YGL068W	MNP1	1003	0.12404	0.108332	0.0277417	0.273479	0.0495048	0.133409	0.0967471	0.157207	0.135228	0.322608	0.119801	0.0896426	0.383469	0.447405	0.40478	0.40492	0.53996	0.355103	0.420168
YBR112C	CYC8	1004	0.21321	0.0648778	0.27598	0.316953	0.187981	0.0663952	0.207021	0.189615	0.163535	0.178893	0.216818	0.158929	0.0295121	0.111709	0.0328823	0.0839968	0.0656358	0.140448	0.245809
YMR080C	NAM7	1005	0.095129	0.086332	0.0957493	0.140647	0.0247759	0.0543193	0.114511	0.187511	0.0581621	0.134601	0.0406878	0.10022	0.115718	0.284599	0.304009	0.235563	0.285509	0.217956	0.457234
YGR214W	RPS0A	1006	0.10874	0.177334	0.138303	0.183748	0.0611879	0.14456	0.0725233	0.0490101	0.110135	0.154639	0.0530706	0.153804	0.136074	0.314235	0.168229	0.207793	0.239893	0.282127	0.520596
YPR029C	APL4	1007	0.179386	0.0577208	0.125845	0.220825	0.0418078	0.0453164	0.00158982	0.249469	0.0678314	0.244114	0.144537	0.142067	0.114724	0.108863	0.17039	0.241206	0.217139	0.189445	0.348266
YER086W	ILV1	1008	0.178558	0.113408	0.0743354	0.143808	0.0430377	0.09223	0.0272536	0.110683	0.11381	0.0719559	0.101279	0.154516	0.0716638	0.155319	0.130272	0.0710851	0.095039	0.0460412	0.268039
YMR200W	ROT1	1009	0.144252	0.088038	0.078093	0.106522	0.0720954	0.127531	0.00382645	0.227162	0.277396	0.0399471	0.0483366	0.0545758	0.160921	0.194924	0.184497	0.151001	0.33236	0.371456	0.345509
YDR432W	NPL3	1010	0.214293	0.0965927	0.227756	0.256534	0.0952048	0.099934	0.084627	0.00465364	0.176287	0.165933	0.168586	0.134289	0.0287958	0.23162	0.0562612	0.116678	0.0133113	0.195078	0.327104
YCR035C	RRP43	1011	0.204199	0.0648718	0.162163	0.185633	0.0342284	0.120174	0.187674	0.0689124	0.0961311	0.160685	0.102148	0.113838	0.0652577	0.288798	0.436359	0.423374	0.274669	0.300297	0.58853
YMR031C	EIS1	1012	0.0855511	0.150064	0.0919236	0.12777	0.0854027	0.100471	0.00110962	0.252327	0.093007	0.0397084	0.121801	0.141506	0.206468	0.0875719	0.0472849	0.142412	0.143855	0.113925	0.116775
YLR250W	SSP120	1013	0.189923	0.090086	0.15053	0.185496	0.131415	0.12101	0.00786144	0.179455	0.295379	0.0665273	0.16189	0.0571676	0.167848	0.310385	0.311307	0.370674	0.34332	0.419622	0.527955
YKR035W-A	DID2	1014	0.166121	0.192471	0.200092	0.334902	0.148006	0.0292985	0.268876	0.148238	0.192211	0.156176	0.121061	0.122035	0.127879	0.157889	0.221706	0.418876	0.195896	0.346085	0.225594
YIL027C	EMC5	1015	0.155964	0.212185	0.198548	0.222557	0.130326	0.0177427	0.0601513	0.126294	0.102586	0.132	0.00646098	0.0679305	0.296572	0.4905	0.50031	0.421192	0.449389	0.604058	0.661808
YHL040C	ARN1	1016	0.284993	0.10111	0.090403	0.262197	0.039195	0.0642136	0.0610545	0.195423	0.252424	0.245629	0.19481	0.21491	0.230052	0.050728	0.105664	0.26513	0.396043	0.208927	0.500659
YCR016W	YCR016W	1017	0.149025	0.164421	0.352144	0.283157	0.180268	0.118569	0.309237	0.161465	0.227573	0.0662746	0.0814893	0.00348593	0.308281	0.413273	0.713972	0.373192	0.520085	0.394006	0.616039
YGR271C-A	EFG1	1018	0.106534	0.228178	0.270355	0.16371	0.188171	0.178937	0.240094	0.25261	0.335167	0.0154983	0.131262	0.0104955	0.311906	0.398715	0.747157	0.621789	0.63119	0.405623	0.770144
YDL121C	YDL121C	1019	0.143358	0.239804	0.292577	0.249689	0.0136208	0.164071	0.0461687	0.0976768	0.0962041	0.129338	0.219222	0.0969362	0.235464	0.332051	0.668995	0.458714	0.595035	0.651116	0.412265
YPR148C	YPR148C	1020	0.142617	0.116334	0.222255	0.254329	0.084084	0.0379682	0.0286801	0.0906295	0.207417	0.0891463	0.13289	0.138276	0.19535	0.243417	0.116328	0.351665	0.315306	0.118521	0.435157
YLR330W	CHS5	1021	0.186636	0.102462	0.179449	0.229463	0.0472503	0.0747913	0.106294	0.139284	0.137707	0.163891	0.103222	0.0991884	0.151942	0.153685	0.0258198	0.252509	0.224718	0.0758502	0.285228
YLR222C	UTP13	1022	0.149183	0.0832846	0.16695	0.185375	0.0978451	0.0743175	0.135726	0.139284	0.0961648	0.0655231	0.159024	0.120969	0.102092	0.358153	0.615098	0.417463	0.618356	0.425628	0.634777
YDR510W	SMT3	1023	0.311549	0.154786	0.144775	0.249393	0.0727629	0.173533	0.133757	0.17906	0.216222	0.150677	0.16495	0.179369	0.40397	0.251277	0.00707187	0.134756	0.196883	0.019161	0.681758
YIL040W	APQ12	1024	0.120052	0.186453	0.142958	0.28716	0.116844	0.106713	0.0313913	0.198483	0.0676053	0.280735	0.135054	0.25546	0.229041	0.320199	0.837853	0.134719	0.396813	0.381039	0.388458
YDL002C	NHP10	1025	0.11749	0.143321	0.199338	0.218428	0.108327	0.0237629	0.0160998	0.287951	0.176765	0.184851	0.15955	0.13975	0.259811	0.2711	0.241906	0.317336	0.19109	0.28373	0.259747
YNR001C	CIT1	1026	0.207432	0.161693	0.164735	0.189562	0.0898939	0.0773188	0.179533	0.120525	0.214833	0.161487	0.0441134	0.12193	0.182573	0.136636	0.239256	0.0978691	0.217729	0.117609	0.0452309
YDL099W	BUG1	1027	0.244351	0.114585	0.304382	0.23329	0.104455	0.0613471	0.145173	0.311677	0.255782	0.250384	0.180752	0.100986	0.215043	0.199336	0.300693	0.332228	0.343765	0.205704	0.34373
YDR339C	FCF1	1028	0.239584	0.0733745	0.322609	0.268695	0.0719452	0.076884	0.365904	0.0974086	0.314769	0.203321	0.115276	0.0704901	0.0567519	0.395402	0.453058	0.329591	0.430878	0.416094	0.426266
YMR043W	MCM1	1029	0.159563	0.187776	0.219048	0.229207	0.283843	0.0351368	0.111272	0.207612	0.205914	0.114027	0.219167	0.19658	0.156805	0.201452	0.172196	0.173752	0.0560761	0.24601	0.16424
YML069W	POB3	1030	0.137871	0.110197	0.122938	0.132729	0.0608413	0.0336573	0.114565	0.255549	0.119002	0.1754	0.0809226	0.136369	0.226483	0.118272	0.289229	0.230153	0.226987	0.156234	0.38495
YLR168C	UPS2	1031	0.054292	0.135035	0.0577396	0.133151	0.0996887	0.065244	0.264032	0.143703	0.141991	0.0996775	0.0468684	0.0957714	0.183477	0.109922	0.0327697	0.294869	0.0569112	0.257763	0.222166
YML010W	SPT5	1032	0.193656	0.0586461	0.172293	0.181403	0.0931348	0.0550855	0.0307432	0.0898675	0.0697359	0.0889389	0.151143	0.100909	0.168375	0.185213	0.190477	0.313494	0.182824	0.198571	0.394876
YLL009C	COX17	1033	0.149112	0.254839	0.317014	0.279463	0.277475	0.210878	0.281298	0.0571551	0.124814	0.262075	0.164873	0.0358423	0.0969363	0.553746	0.720997	0.0379706	0.17785	0.30062	0.616039
YEL015W	EDC3	1034	0.0920778	0.0861384	0.196954	0.253835	0.0557582	0.0125526	0.0879879	0.0680926	0.0762732	0.16043	0.0933228	0.124857	0.123739	0.24669	0.184442	0.149127	0.231245	0.314564	0.305281
YLL008W	DRS1	1035	0.220619	0.111372	0.245953	0.14124	0.20648	0.142631	0.239255	0.110055	0.251476	0.0515016	0.191342	0.120169	0.130386	0.434469	0.601422	0.450074	0.486629	0.385499	0.63469
YBR173C	UMP1	1036	0.238796	0.245498	0.206856	0.370319	0.0684589	0.0993504	0.119393	0.314519	0.212433	0.163931	0.102626	0.0282634	0.303927	0.125053	0.269532	0.000665002	0.225637	0.399345	0.410111
YIL130W	ASG1	1037	0.142127	0.0509489	0.130656	0.146224	0.101676	0.0124609	0.138862	0.0994054	0.0965568	0.164918	0.175471	0.110755	0.149853	0.230126	0.336477	0.241109	0.17785	0.212291	0.494287
YGR083C	GCD2	1038	0.161035	0.0708992	0.30462	0.227636	0.176637	0.104436	0.26859	0.0689124	0.187389	0.164297	0.158514	0.158496	0.150233	0.269706	0.476587	0.199628	0.231125	0.252631	0.47207
YOR028C	CIN5	1039	0.106459	0.144406	0.055568	0.287373	0.1451	0.200819	0.118328	0.0975367	0.140268	0.377867	0.06537	0.154679	0.308456	0.0135307	0.315745	0.0888373	0.367679	0.206794	0.311773
YER138W-A	YER138W-A	1040	0.218781	0.203419	0.264738	0.3827	0.0616584	0.0177229	0.134854	0.0344604	0.588004	0.482864	0.179048	0.154099	0.150137	0.129322	0.94595	0.953242	0.844213	0.921146	0.856315
YIL074C	SER33	1041	0.155415	0.0898709	0.216182	0.221098	0.0471285	0.04494	0.358201	0.511139	0.106673	0.0295656	0.123945	0.163648	0.0763689	0.169436	0.102848	0.290201	0.17785	0.310372	0.376002
YJR064W	CCT5	1042	0.147934	0.153326	0.168661	0.138276	0.0428268	0.0158145	0.0589975	0.113065	0.14111	0.0974521	0.0523038	0.116742	0.162249	0.259514	0.416607	0.348809	0.324794	0.302717	0.48186
YOR239W	ABP140	1043	0.246953	0.0546729	0.221752	0.215713	0.107965	0.0746416	0.208295	0.160786	0.113928	0.0874447	0.164718	0.0986589	0.132029	0.0653928	0.297414	0.11557	0.158538	0.115829	0.352488
YMR049C	ERB1	1044	0.136685	0.18814	0.315321	0.173613	0.189361	0.113466	0.279478	0.141631	0.0804877	0.0374439	0.164316	0.126585	0.0953007	0.407885	0.678475	0.405313	0.462763	0.400556	0.648375
YNL186W	UBP10	1045	0.112048	0.110057	0.201493	0.112036	0.111036	0.0710558	0.146707	0.187985	0.121186	0.0633925	0.161351	0.0937964	0.103429	0.317453	0.466076	0.301029	0.394701	0.285508	0.610367
YGR105W	VMA21	1046	0.0172869	0.282755	0.230871	0.242464	0.0669101	0.0661569	0.318171	0.119213	0.159591	0.122932	0.0231951	0.157548	0.332213	0.319511	0.439194	0.486063	0.297571	0.368235	0.519729
YPL010W	RET3	1047	0.18762	0.127021	0.0873239	0.180711	0.144498	0.113856	0.0466055	0.0413765	0.0769421	0.0590873	0.109305	0.115551	0.216942	0.489833	0.648311	0.4512	0.385868	0.583103	0.687318
YPR112C	MRD1	1048	0.203704	0.145886	0.255247	0.147804	0.154502	0.0900069	0.298679	0.193597	0.153981	0.0536813	0.0900444	0.140297	0.0664869	0.402757	0.684356	0.430796	0.610492	0.447625	0.762745
YBR248C	HIS7	1049	0.0854887	0.0468413	0.0455471	0.152547	0.0161122	0.11072	0.141691	0.164702	0.0598498	0.0616775	0.0690136	0.105586	0.123737	0.140801	0.0155568	0.0515677	0.0173425	0.0724758	0.150141
YNL077W	APJ1	1050	0.201737	0.191643	0.283133	0.427547	0.122584	0.140879	0.169509	0.292695	0.0840053	0.059724	0.175092	0.0549238	0.0644227	0.0657055	0.00377109	0.117257	0.236514	0.239009	0.225928
YOR020W-A	YOR020W-A	1051	0.0667466	0.0883429	0.270937	0.367713	0.0504704	0.0771098	0.0038042	0.340097	0.165924	0.16123	0.181279	0.0615366	0.272369	0.211374	0.105701	0.278125	0.515205	0.229326	0.0222674
YPL032C	SVL3	1052	0.195869	0.14318	0.2147	0.275966	0.161636	0.0643895	0.194746	0.228993	0.0633848	0.146794	0.178298	0.196323	0.161346	0.218479	0.371734	0.189773	0.202045	0.221251	0.527388
YDL225W	SHS1	1053	0.174532	0.0687565	0.204582	0.188103	0.0464045	0.0727737	0.12509	0.237095	0.106804	0.116495	0.137386	0.0812733	0.072667	0.211374	0.305355	0.267381	0.21425	0.168466	0.389101
YGR180C	RNR4	1054	0.240451	0.172577	0.246231	0.316343	0.0373751	0.11763	0.135854	0.0366826	0.0820263	0.162645	0.143509	0.236512	0.256378	0.349975	0.198556	0.472975	0.441686	0.453744	0.640609
YKL212W	SAC1	1055	0.188065	0.0375711	0.134336	0.157327	0.062971	0.0928171	0.021723	0.15591	0.0922377	0.135423	0.158262	0.135892	0.158066	0.243332	0.215626	0.273036	0.132276	0.272788	0.401704
YMR290C	HAS1	1056	0.118806	0.134324	0.269848	0.19886	0.0598575	0.12357	0.244291	0.167337	0.191071	0.146228	0.134717	0.062432	0.119486	0.334108	0.602033	0.350474	0.499319	0.471613	0.783604
YLR256W	HAP1	1057	0.10518	0.0340397	0.0515936	0.147371	0.0244431	0.0595378	0.0632531	0.256734	0.15815	0.105255	0.167583	0.147756	0.0949945	0.263733	0.240971	0.289774	0.197406	0.205217	0.40371
YJR090C	GRR1	1058	0.172822	0.0336171	0.165249	0.222805	0.0644164	0.01977	0.0592534	0.223983	0.0991697	0.129295	0.10788	0.146836	0.193004	0.145682	0.279862	0.353881	0.217947	0.17326	0.424709
YBR048W	RPS11B	1059	0.0662773	0.164727	0.169176	0.204656	0.0270872	0.105199	0.128823	0.264383	0.12881	0.220308	0.0482888	0.173597	0.0898327	0.238822	0.133417	0.302204	0.00808979	0.20714	0.693512
YHR088W	RPF1	1060	0.277094	0.159597	0.317023	0.227896	0.221614	0.141675	0.388743	0.190533	0.177586	0.0365419	0.137754	0.0813857	0.142113	0.545244	0.909041	0.488495	0.807398	0.533962	0.767204
YHL036W	MUP3	1061	0.164286	0.174384	0.46235	0.656955	0.0574956	0.149822	0.19855	0.16491	0.164608	0.0364867	0.0497565	0.180853	0.146884	0.00985965	0.189944	0.17197	0.0851726	0.193178	0.0265008
YIL036W	CST6	1062	0.228716	0.110978	0.208311	0.267597	0.0887604	0.0364313	0.145486	0.113065	0.0727966	0.12147	0.139197	0.0880291	0.0472874	0.0400465	0.177942	0.119826	0.0187676	0.00800039	0.229212
YBL105C	PKC1	1063	0.199903	0.0573539	0.133833	0.166139	0.0312208	0.0259678	0.0507462	0.246704	0.070217	0.115907	0.14597	0.057499	0.121705	0.0757718	0.203142	0.306552	0.261066	0.147298	0.408262
YJR044C	VPS55	1064	0.154007	0.153511	0.258687	0.256992	0.138684	0.0268876	0.0899392	0.172125	0.331896	0.387622	0.134916	0.316642	0.243629	0.178072	0.0612153	0.274411	0.420284	0.28373	0.319068
YNL176C	TDA7	1065	0.12924	0.100488	0.0989459	0.293674	0.0519898	0.121927	0.0651545	0.120982	0.151379	0.15592	0.170335	0.274735	0.0428867	0.18807	0.150361	0.0591704	0.032399	0.132502	0.243461
YOR158W	PET123	1066	0.179534	0.0487033	0.304923	0.242846	0.0717703	0.0675826	0.0750412	0.152242	0.194375	0.182792	0.108015	0.157979	0.0393558	0.121108	0.255531	0.146856	0.0533768	0.231451	0.322451
YKL175W	ZRT3	1067	0.0967088	0.137422	0.157125	0.232687	0.0378123	0.132119	0.266885	0.680485	0.1978	0.255899	0.111104	0.14027	0.176871	0.161983	0.149298	0.159296	0.202214	0.219399	0.489967
YGL086W	MAD1	1068	0.244899	0.0847033	0.311181	0.250434	0.0487733	0.0385543	0.0980687	0.215216	0.128659	0.195043	0.125605	0.101846	0.176459	0.181808	0.284128	0.333227	0.32646	0.212291	0.387477
YER105C	NUP157	1069	0.124937	0.0783769	0.0797608	0.161221	0.00966439	0.0343993	0.0334007	0.174442	0.147132	0.165641	0.112541	0.157497	0.0614645	0.241312	0.414485	0.277747	0.330099	0.250462	0.480652
YEL022W	GEA2	1070	0.158712	0.0218587	0.137094	0.214873	0.0146563	0.0610489	0.0770345	0.243554	0.0821995	0.183051	0.179158	0.151492	0.242363	0.150995	0.326279	0.30941	0.305284	0.21493	0.457858
YBR017C	KAP104	1071	0.12201	0.0466093	0.0708921	0.176728	0.0407742	0.0479929	0.00644466	0.224541	0.104367	0.129968	0.0892001	0.1225	0.10276	0.266097	0.475783	0.349167	0.456943	0.306942	0.493675
YPR144C	NOC4	1072	0.103138	0.13759	0.186898	0.163198	0.0479609	0.061069	0.286966	0.200648	0.126295	0.143831	0.153201	0.140325	0.137523	0.410383	0.663141	0.39741	0.567046	0.454036	0.715205
YBR171W	SEC66	1073	0.125225	0.139213	0.100936	0.297463	0.051512	0.0568764	0.0404654	0.0316873	0.126929	0.126128	0.0584904	0.135686	0.22438	0.32631	0.494217	0.485039	0.360369	0.426002	0.308605
YDL088C	ASM4	1074	0.245341	0.0921319	0.20662	0.242057	0.0717931	0.0286224	0.170349	0.117787	0.0631026	0.263322	0.15044	0.177829	0.0365847	0.135631	0.284243	0.203415	0.0594611	0.227597	0.422668
YEL002C	WBP1	1075	0.0430632	0.129466	0.111014	0.187658	0.0556089	0.0606623	0.0959588	0.138295	0.180746	0.142261	0.101142	0.254347	0.129843	0.193225	0.33194	0.31391	0.279101	0.272403	0.463113
YHR039C-A	VMA10	1076	0.129703	0.266608	0.351024	0.360581	0.0831714	0.0318016	0.0108785	0.137354	0.237244	0.28	0.028142	0.117156	0.100628	0.18914	0.465108	0.302094	0.386703	0.310517	0.416575
YNL123W	NMA111	1077	0.171135	0.0733227	0.148052	0.173291	0.0606539	0.00487994	0.103712	0.0974086	0.184604	0.138456	0.0887918	0.173525	0.0680502	0.268448	0.35361	0.367558	0.319792	0.376253	0.568356
YIL144W	NDC80	1078	0.208634	0.0589628	0.231546	0.169648	0.0719774	0.035623	0.101215	0.246153	0.169204	0.0844938	0.202565	0.024457	0.153476	0.178178	0.289955	0.174407	0.265877	0.16652	0.369542
YFL034C-A	RPL22B	1079	0.170728	0.0821528	0.130343	0.10826	0.0690665	0.0633665	0.186702	0.238652	0.119518	0.00150096	0.0977875	0.109243	0.158963	0.282935	0.6506	0.297204	0.395584	0.366923	0.559966
YNL177C	MRPL22	1080	0.136752	0.103416	0.178699	0.128733	0.0690598	0.0494117	0.0149883	0.21116	0.217982	0.0851236	0.106158	0.0764877	0.280568	0.261863	0.399745	0.332929	0.392073	0.371231	0.454438
YLR153C	ACS2	1081	0.09444	0.0742021	0.0507374	0.15497	0.0570189	0.142108	0.015029	0.153528	0.126703	0.134927	0.189932	0.146059	0.181759	0.337715	0.420244	0.345444	0.300202	0.24979	0.439052
YPR048W	TAH18	1082	0.162376	0.162893	0.0722461	0.219245	0.0363176	0.126782	0.16378	0.0773008	0.10537	0.0324782	0.0685813	0.101024	0.0668888	0.25604	0.317617	0.337142	0.292468	0.327579	0.350638
YPL217C	BMS1	1083	0.23473	0.116851	0.223499	0.143787	0.101333	0.136967	0.191781	0.126151	0.155753	0.0915063	0.168311	0.154879	0.0996809	0.376629	0.443611	0.435636	0.47427	0.318059	0.579102
YLR200W	YKE2	1084	0.329269	0.115721	0.355218	0.368105	0.209662	0.172251	0.116656	0.184636	0.376663	0.0162529	0.133055	0.137065	0.477594	0.118272	0.327584	0.366536	0.345023	0.338002	0.664933
YJL076W	NET1	1085	0.183753	0.0705475	0.158955	0.179228	0.0638658	0.0772898	0.107293	0.20736	0.143658	0.130091	0.134488	0.162287	0.109614	0.251534	0.245856	0.229751	0.215617	0.216289	0.435365
YER056C-A	RPL34A	1086	0.219713	0.157141	0.245668	0.291486	0.0414549	0.0545133	0.172268	0.114352	0.100984	0.222849	0.013567	0.0431372	0.000456248	0.279642	0.262428	0.22879	0.23399	0.335833	0.497997
YLR163C	MAS1	1087	0.185447	0.100157	0.164173	0.161915	0.0894323	0.0331368	0.147793	0.027841	0.07154	0.0549737	0.131502	0.169298	0.0281858	0.213215	0.273309	0.25589	0.24332	0.227457	0.446744
YLR022C	SDO1	1088	0.138172	0.0689812	0.22992	0.184431	0.0338606	0.112571	0.191126	0.0024337	0.044554	0.0896043	0.150759	0.0398425	0.0771473	0.373439	0.465108	0.458191	0.747618	0.493422	0.724359
YER068W	MOT2	1089	0.102134	0.0441042	0.0891589	0.226868	0.101917	0.0591801	0.048454	0.213423	0.200406	0.15321	0.118721	0.152882	0.132937	0.124233	0.175882	0.175308	0.253875	0.188487	0.287183
YPR060C	ARO7	1090	0.118191	0.102318	0.184115	0.217965	0.0272867	0.0769222	0.165165	0.000568874	0.14296	0.221411	0.0535398	0.0357614	0.314873	0.392425	0.450488	0.441769	0.443117	0.519051	0.631462
YHL020C	OPI1	1091	0.132739	0.0471341	0.120842	0.0977649	0.0264899	0.0361254	0.0539961	0.278026	0.13922	0.0705661	0.070903	0.0777681	0.223588	0.211374	0.040074	0.108595	0.212827	0.253539	0.180712
YDL005C	MED2	1092	0.233136	0.106443	0.360948	0.355521	0.227066	0.0261061	0.276729	0.0951435	0.230781	0.176325	0.291589	0.122672	0.0371244	0.0623327	0.256652	0.171455	0.377486	0.248407	0.350761
YIL105C	SLM1	1093	0.183309	0.112202	0.183511	0.266865	0.0891787	0.0581783	0.131601	0.178594	0.128526	0.162151	0.20772	0.148392	0.178032	0.158813	0.375532	0.173997	0.149628	0.163332	0.268447
YMR010W	YMR010W	1094	0.156316	0.0889257	0.0945996	0.107459	0.0310293	0.0545319	0.00610396	0.178862	0.133299	0.277561	0.123762	0.124704	0.0965224	0.224551	0.284683	0.309381	0.199331	0.446583	0.568912
YAL029C	MYO4	1095	0.185756	0.0607362	0.104003	0.128931	0.0535833	0.0294508	0.079785	0.265635	0.0927785	0.089137	0.179628	0.0979258	0.0977791	0.207772	0.291687	0.403472	0.325738	0.271445	0.577942
YJL026W	RNR2	1096	0.122918	0.0449181	0.150175	0.215512	0.16207	0.0264374	0.143386	0.166761	0.12797	0.150914	0.0750099	0.108064	0.189757	0.283408	0.277216	0.367877	0.414913	0.32115	0.556354
YGR009C	SEC9	1097	0.190971	0.0684404	0.194718	0.189355	0.0753283	0.0477625	0.0382815	0.160977	0.104224	0.102252	0.203035	0.0969392	0.0850456	0.198219	0.181767	0.304314	0.18762	0.24203	0.314642
YMR090W	YMR090W	1098	0.166657	0.0831328	0.153964	0.20515	0.150286	0.127826	0.176804	0.131979	0.340385	0.162523	0.173866	0.195835	0.0979756	0.00500008	0.397329	0.0661463	0.00783732	0.0481831	0.0866232
YOL028C	YAP7	1099	0.128537	0.0821638	0.0560137	0.144608	0.0968738	0.117485	0.256512	0.105342	0.0998941	0.0225775	0.121346	0.125193	0.23526	0.198749	0.187674	0.121671	0.0770465	0.118737	0.359173
YIL076W	SEC28	1100	0.0928868	0.158326	0.085511	0.216673	0.0449948	0.116339	0.048794	0.254794	0.172909	0.0329129	0.167725	0.0538979	0.343893	0.257503	0.291855	0.275393	0.277629	0.355835	0.492717
YBL058W	SHP1	1101	0.176538	0.0855771	0.142986	0.258848	0.0858738	0.131181	0.109622	0.275463	0.191822	0.138651	0.104354	0.112928	0.153605	0.179019	0.00300577	0.242885	0.259684	0.199969	0.474352
YBR047W	FMP23	1102	0.147446	0.19044	0.138259	0.302191	0.133649	0.127096	0.196711	0.336579	0.260031	0.0737668	0.0715505	0.0130123	0.150936	0.127011	0.404093	0.24242	0.107702	0.225824	0.10645
YBR069C	TAT1	1103	0.0124063	0.113171	0.0600669	0.206903	0.08626	0.046849	0.0771915	0.394014	0.108115	0.127171	0.204894	0.181962	0.390961	0.278355	0.404671	0.301181	0.303264	0.333975	0.391608
YOL036W	YOL036W	1104	0.107906	0.0914751	0.164485	0.148231	0.113547	0.0142592	0.117971	0.113957	0.100848	0.0910378	0.142545	0.099545	0.0963776	0.21875	0.144312	0.160202	0.149993	0.171643	0.504862
YER050C	RSM18	1105	0.188832	0.225832	0.211869	0.242939	0.124125	0.025282	0.00662216	0.290304	0.15563	0.166692	0.0947324	0.106266	0.244498	0.169917	0.221206	0.214308	0.0246232	0.392368	0.0301285
YCR084C	TUP1	1106	0.159817	0.111639	0.112892	0.211897	0.0705911	0.0910964	0.0699007	0.18507	0.107634	0.203134	0.118506	0.22321	0.168939	0.0630652	0.141554	0.00451601	0.0629036	0.0757641	0.290729
YOL064C	MET22	1107	0.0754964	0.0933829	0.0147019	0.172686	0.0534243	0.104558	0.187907	0.36527	0.237426	0.155942	0.101893	0.11698	0.0969382	0.21978	0.396826	0.329692	0.346827	0.253525	0.438388
YLR034C	SMF3	1108	0.0347577	0.0336989	0.0886586	0.0246996	0.0835826	0.117309	0.100336	0.283873	0.193731	0.178733	0.0668752	0.263352	0.122609	0.226883	0.433114	0.431437	0.612526	0.306496	0.44108
YPR101W	SNT309	1109	0.189693	0.19784	0.169654	0.188997	0.0434622	0.033084	0.0123611	0.173228	0.172656	0.00221735	0.0764774	0.101304	0.305395	0.211374	0.413985	0.276782	0.365646	0.140135	0.514764
YLR229C	CDC42	1110	0.0847792	0.193149	0.121119	0.219651	0.0660242	0.0712892	0.0168984	0.03542	0.115439	0.0451738	0.0498353	0.198174	0.260005	0.211374	0.0248816	0.245302	0.311701	0.420466	0.436315
YJR070C	LIA1	1111	0.174382	0.136645	0.175887	0.302301	0.0294473	0.1195	0.219386	0.0269812	0.252544	0.0301698	0.0256978	0.140598	0.163745	0.33394	0.58114	0.381826	0.491386	0.476017	0.628137
YPR168W	NUT2	1112	0.0872191	0.180233	0.223472	0.17437	0.123766	0.0834096	0.16766	0.0454573	0.133829	0.165549	0.261513	0.15154	0.0665701	0.228842	0.182584	0.389827	0.318076	0.380814	0.477259
YLR287C	YLR287C	1113	0.190281	0.162155	0.255001	0.219248	0.0824059	0.091961	0.215617	0.197868	0.10646	0.116579	0.200295	0.0505746	0.117297	0.3777	0.480244	0.333198	0.415507	0.331698	0.559291
YKL032C	IXR1	1114	0.17933	0.0512621	0.305379	0.323991	0.195272	0.0896013	0.168478	0.107815	0.198528	0.241157	0.142365	0.20671	0.00894766	0.0178411	0.203816	0.0601041	0.137476	0.154653	0.255679
YGR233C	PHO81	1115	0.159132	0.0770385	0.109398	0.1856	0.0714056	0.0666047	0.035705	0.335339	0.0382816	0.13723	0.156551	0.241824	0.154541	0.646661	0.769903	0.625997	0.611153	0.701714	0.90286
YDR354W	TRP4	1116	0.0981172	0.136861	0.0395878	0.170357	0.0817562	0.114788	0.0208306	0.124389	0.338741	0.106228	0.143035	0.096539	0.147006	0.176317	0.0357122	0.00653923	0.113338	0.246193	0.0944915
YJR004C	SAG1	1117	0.12581	0.0949229	0.112049	0.109499	0.0740385	0.150164	0.13186	0.278145	0.274462	0.155506	0.0932625	0.161292	0.28246	0.208532	0.457109	0.394844	0.54617	0.256615	0.426051
YKR016W	MIC60	1118	0.209974	0.0376184	0.194728	0.241091	0.0939575	0.0613055	0.0531214	0.172521	0.121508	0.230415	0.157246	0.153978	0.159225	0.112971	0.0751387	0.217104	0.0149164	0.173094	0.262856
YGL071W	AFT1	1119	0.149551	0.0542889	0.137055	0.247464	0.168627	0.0987925	0.129378	0.188668	0.186561	0.157775	0.17382	0.153833	0.135159	0.138027	0.377492	0.121917	0.27334	0.177574	0.404213
YLL039C	UBI4	1120	0.17857	0.0891726	0.248719	0.227011	0.100883	0.184077	0.162412	0.199717	0.209932	0.276236	0.139605	0.152595	0.182563	0.037272	0.0392057	0.181981	0.1703	0.0375848	0.04511
YER094C	PUP3	1121	0.133161	0.0753226	0.0586366	0.178948	0.133746	0.0648271	0.00926837	0.169338	0.307107	0.0631331	0.081174	0.00783431	0.441929	0.374703	0.319654	0.417547	0.377172	0.453393	0.413421
YDL065C	PEX19	1122	0.152333	0.182166	0.241299	0.278326	0.108132	0.117905	0.12155	0.157801	0.0809203	0.0447113	0.0217578	0.167367	0.302173	0.286652	0.0345277	0.205211	0.200134	0.215276	0.232887
YOR141C	ARP8	1123	0.196942	0.107067	0.165591	0.184704	0.0644973	0.0210114	0.0706469	0.273261	0.196155	0.148335	0.144385	0.148804	0.0254035	0.119388	0.21527	0.203011	0.200253	0.143772	0.350863
YLL027W	ISA1	1124	0.116994	0.0689813	0.100035	0.142599	0.130718	0.0898696	0.132938	0.0674466	0.188921	0.0304189	0.133114	0.116781	0.224466	0.116039	0.0552245	0.036352	0.116324	0.208396	0.153519
YER120W	SCS2	1125	0.131618	0.0523365	0.214104	0.21557	0.0325318	0.121661	0.0309515	0.104141	0.11698	0.179809	0.085595	0.0463217	0.125322	0.211374	0.243824	0.0350551	0.226303	0.276971	0.498778
YOR045W	TOM6	1126	0.164599	0.0423854	0.243671	0.223364	0.118996	0.107308	0.0165037	0.151835	0.293208	0.330408	0.166371	0.277333	0.101191	0.3476	0.498895	0.405671	0.989899	0.425503	0.446186
YBR046C	ZTA1	1127	0.164577	0.22103	0.0507663	0.195511	0.0397527	0.0892254	0.0279401	0.212458	0.200778	0.215883	0.0788685	0.0411785	0.078318	0.073671	0.270212	0.0578672	0.125482	0.0560921	0.206849
YKR068C	BET3	1128	0.130116	0.129032	0.119105	0.181493	0.127151	0.151201	0.00938241	0.00617911	0.131509	0.0429844	0.0820691	0.0729804	0.200959	0.185409	0.566236	0.426388	0.384793	0.393901	0.76402
YDL155W	CLB3	1129	0.108382	0.0459593	0.118222	0.16129	0.0400787	0.0382643	0.0196015	0.296779	0.162765	0.141449	0.137762	0.0743095	0.134943	0.222224	0.361482	0.197883	0.123708	0.232929	0.412265
YOR116C	RPO31	1130	0.126483	0.0594593	0.0894264	0.102705	0.0352735	0.0811424	0.0513104	0.203974	0.0716468	0.0897458	0.143407	0.136697	0.0905477	0.309089	0.525003	0.406271	0.431443	0.359694	0.709129
YJL166W	QCR8	1131	0.212079	0.15578	0.149597	0.262817	0.274701	0.181209	0.000820481	0.127233	0.0900413	0.252377	0.0616999	0.117458	0.167761	0.375538	0.138153	0.313602	0.0785533	0.318886	0.127814
YDL106C	PHO2	1132	0.180939	0.0948404	0.212114	0.256606	0.184165	0.0311682	0.0969895	0.175775	0.214257	0.210178	0.130271	0.177736	0.123213	0.0906556	0.0216851	0.163271	0.0772624	0.0887793	0.291423
YER151C	UBP3	1133	0.198224	0.0838419	0.241459	0.223375	0.129126	0.0309283	0.0840938	0.231497	0.123072	0.206264	0.163853	0.208645	0.17102	0.0975616	0.15223	0.233026	0.152899	0.186397	0.412517
YDR525W-A	SNA2	1134	0.0897341	0.173547	0.309154	0.230231	0.213281	0.279295	0.0138908	0.200264	0.184781	0.49544	0.130219	0.0887858	0.194446	0.286959	0.481007	0.129224	0.551424	0.385656	0.451507
YBR164C	ARL1	1135	0.16903	0.0561305	0.111648	0.167829	0.0665846	0.146255	0.0467604	0.302984	0.0893171	0.192717	0.0802739	0.0971779	0.15189	0.326529	0.598267	0.469934	0.364447	0.346041	0.422575
YDR129C	SAC6	1136	0.117666	0.0487167	0.148877	0.113147	0.166697	0.0135989	0.111806	0.321429	0.0995506	0.177254	0.140524	0.158936	0.153779	0.135205	0.164289	0.190007	0.107958	0.150228	0.235385
YDL190C	UFD2	1137	0.133493	0.0224237	0.0984912	0.207591	0.0599792	0.0480068	0.0557716	0.146225	0.0460915	0.128648	0.157292	0.207989	0.192172	0.0818509	0.206134	0.180689	0.319591	0.0401802	0.371104
YDR449C	UTP6	1138	0.163013	0.183499	0.21271	0.192207	0.122599	0.0984495	0.161327	0.0228665	0.17833	0.0664134	0.094659	0.0571866	0.13047	0.28633	0.581416	0.29625	0.526814	0.466461	0.609051
YMR091C	NPL6	1139	0.140927	0.106817	0.0880375	0.162355	0.073347	0.0299158	0.124433	0.166662	0.20149	0.0592377	0.0810127	0.186753	0.149824	0.189305	0.190517	0.310515	0.215852	0.220464	0.699222
YDR356W	SPC110	1140	0.204717	0.0779727	0.247457	0.308572	0.140666	0.0862283	0.189976	0.245492	0.248934	0.197267	0.20003	0.191309	0.23871	0.20404	0.213992	0.246953	0.21646	0.206807	0.498445
YDR266C	HEL2	1141	0.209845	0.0469134	0.130996	0.170268	0.095269	0.0466866	0.07939	0.309913	0.0588122	0.232765	0.191986	0.100724	0.124595	0.208395	0.342166	0.227457	0.231125	0.270676	0.486192
YEL055C	POL5	1142	0.101594	0.10714	0.151367	0.152127	0.0592766	0.16778	0.0563459	0.215064	0.0800165	0.153027	0.12821	0.129518	0.169026	0.387975	0.571732	0.404852	0.50686	0.361615	0.68345
YGL120C	PRP43	1143	0.137385	0.0945094	0.18334	0.178069	0.06793	0.0623001	0.251046	0.106441	0.180732	0.101698	0.167432	0.16306	0.0473365	0.364603	0.565484	0.280543	0.436374	0.359836	0.658344
YMR014W	BUD22	1144	0.255871	0.0912758	0.32631	0.163442	0.0973882	0.099771	0.291794	0.216666	0.183426	0.15285	0.138897	0.0794559	0.130748	0.337264	0.434785	0.375266	0.540741	0.348626	0.428687
YKR043C	SHB17	1145	0.150403	0.0898027	0.191695	0.232885	0.0536136	0.0598321	0.0554092	0.00193791	0.178943	0.104394	0.0909228	0.0587877	0.125314	0.387653	0.153885	0.352167	0.395836	0.320916	0.399497
YDR292C	SRP101	1146	0.191388	0.0974757	0.136394	0.132335	0.0831944	0.0505039	0.0152423	0.0936779	0.0348854	0.109102	0.13489	0.164522	0.236409	0.211374	0.255362	0.281447	0.439465	0.279817	0.421529
YDR165W	TRM82	1147	0.176009	0.160893	0.236895	0.174462	0.10629	0.0981447	0.204481	0.0874644	0.0459319	0.135432	0.0175702	0.0823615	0.136481	0.397227	0.57358	0.466529	0.472373	0.49292	0.657486
YLR027C	AAT2	1148	0.200595	0.119864	0.111123	0.152169	0.065116	0.0862225	0.132805	0.0638375	0.192731	0.035023	0.11542	0.082207	0.0236814	0.246994	0.135575	0.141684	0.0690246	0.0230851	0.213082
YDR188W	CCT6	1149	0.155263	0.127196	0.0322625	0.168569	0.0926368	0.130005	0.0467831	0.0295123	0.165107	0.101007	0.0883022	0.0689212	0.07534	0.196232	0.263988	0.170645	0.0994937	0.155326	0.446572
YLR335W	NUP2	1150	0.118936	0.112658	0.225636	0.198357	0.124649	0.0822377	0.134156	0.0714361	0.116337	0.111099	0.136208	0.130547	0.103017	0.249351	0.187298	0.149602	0.23841	0.275268	0.471505
YNL243W	SLA2	1151	0.19097	0.0756012	0.215903	0.172207	0.0723259	0.0497094	0.0549904	0.108102	0.188482	0.162464	0.156409	0.103317	0.10404	0.0248619	0.0258198	0.0220762	0.0221981	0.0488248	0.249092
YOR195W	SLK19	1152	0.261811	0.0538485	0.340831	0.310132	0.0883184	0.109151	0.169652	0.209801	0.205549	0.165472	0.167983	0.102307	0.193509	0.223522	0.376034	0.351439	0.273185	0.298369	0.391001
YBR198C	TAF5	1153	0.158809	0.0985865	0.110449	0.180087	0.0672425	0.0276647	0.0228098	0.144079	0.186558	0.0645627	0.186232	0.140135	0.106491	0.156173	0.119822	0.203296	0.19275	0.151269	0.276676
YJL144W	YJL144W	1154	0.553059	0.351187	0.418025	0.724998	0.138753	0.151199	0.243605	0.301545	0.161184	0.128534	0.586335	0.50808	0.377364	0.0895629	0.250686	0.169517	0.107702	0.244327	0.417256
YNL267W	PIK1	1155	0.143019	0.0347778	0.124253	0.133779	0.0560892	0.00468998	0.117462	0.233518	0.112012	0.252874	0.145433	0.118152	0.108049	0.165435	0.226269	0.235463	0.288162	0.17926	0.418601
YPR086W	SUA7	1156	0.16861	0.130107	0.16628	0.143989	0.0934291	0.0388245	0.100409	0.0530514	0.123878	0.0842817	0.0842111	0.0674825	0.0404039	0.368202	0.317957	0.375687	0.346947	0.228471	0.298662
YLL011W	SOF1	1157	0.155907	0.0404566	0.238602	0.168675	0.155256	0.0778544	0.290482	0.15185	0.0338894	0.0512635	0.0763429	0.0543585	0.225676	0.402297	0.649915	0.467842	0.604157	0.381562	0.568879
YPR167C	MET16	1158	0.253533	0.0836217	0.301448	0.298134	0.073148	0.116339	0.541015	0.54814	0.0472331	0.0896438	0.118293	0.110163	0.186273	0.303278	0.0521022	0.246667	0.101151	0.519093	0.305455
YLR083C	EMP70	1159	0.150523	0.109409	0.0601353	0.0605859	0.0636855	0.0559454	0.0182506	0.169122	0.066167	0.150379	0.105126	0.183574	0.134587	0.165407	0.455182	0.353565	0.380449	0.322758	0.484365
YNL169C	PSD1	1160	0.149736	0.0612988	0.284103	0.00660237	0.0621081	0.0931154	0.413481	0.687317	0.331535	0.0828831	0.0141403	0.145958	0.437586	0.142759	0.157463	0.0846326	0.233245	0.124837	0.314556
YPL129W	TAF14	1161	0.185829	0.115488	0.193838	0.241113	0.0838617	0.0513072	0.039907	0.253606	0.189209	0.231737	0.127059	0.0413161	0.232458	0.238172	0.315336	0.34783	0.314662	0.181877	0.464557
YGR089W	NNF2	1162	0.124986	0.0500912	0.152286	0.170536	0.0699806	0.0216775	0.0669902	0.289139	0.0936278	0.219595	0.168037	0.205904	0.0519963	0.148282	0.346634	0.337513	0.311014	0.183123	0.401401
YOR281C	PLP2	1163	0.145783	0.0987973	0.153405	0.23556	0.0789878	0.0830133	0.181715	0.0100072	0.103544	0.0345241	0.158477	0.104875	0.0720937	0.306403	0.389453	0.313955	0.454076	0.316899	0.551535
YOL061W	PRS5	1164	0.17325	0.150339	0.142285	0.130101	0.0159882	0.0896734	0.00466316	0.0778973	0.229816	0.0432656	0.067094	0.116442	0.148315	0.308189	0.326007	0.242949	0.267708	0.373429	0.432486
YGR026W	YGR026W	1165	0.197963	0.125845	0.134757	0.228142	0.136713	0.112774	0.0108632	0.0835796	0.120041	0.231226	0.130826	0.184771	0.330563	0.0285133	0.201607	0.145044	0.184839	0.14621	0.370009
YMR197C	VTI1	1166	0.218769	0.154069	0.186483	0.255923	0.031128	0.0518348	0.0995769	0.1329	0.0670625	0.175265	0.204144	0.129325	0.26293	0.163116	0.0639279	0.132942	0.150863	0.253068	0.357264
YGR061C	ADE6	1167	0.138375	0.118533	0.10265	0.159702	0.00475184	0.0582074	0.0351564	0.254224	0.118566	0.185647	0.176075	0.170771	0.139036	0.28643	0.276339	0.253825	0.179123	0.224898	0.508209
YOR061W	CKA2	1168	0.197103	0.0686815	0.144488	0.125384	0.100212	0.0591138	0.204225	0.156171	0.0910931	0.107602	0.12718	0.0552595	0.249782	0.320471	0.338715	0.396212	0.44663	0.375822	0.633031
YML018C	YML018C	1169	0.0362549	0.0724734	0.166693	0.257526	0.0497942	0.136765	0.114913	0.156279	0.0680084	0.119514	0.0881336	0.184975	0.0733064	0.32947	0.407651	0.360225	0.42125	0.50594	0.569759
YNR061C	YNR061C	1170	0.187503	0.0366489	0.141065	0.307517	0.131012	0.0750863	0.0405529	0.0530514	0.0438641	0.156195	0.164726	0.228734	0.193505	0.255939	0.491128	0.498145	0.5605	0.400967	0.498404
YLR436C	ECM30	1171	0.0998212	0.0923867	0.117289	0.254833	0.0389134	0.0355396	0.109475	0.23437	0.172472	0.279251	0.219927	0.2368	0.179942	0.131671	0.171586	0.15083	0.0709915	0.120464	0.334255
YDR186C	YDR186C	1172	0.146486	0.0741484	0.110031	0.181484	0.068734	0.00763126	0.15592	0.136863	0.149086	0.116721	0.159389	0.12622	0.0898064	0.174506	0.283487	0.203737	0.231561	0.162874	0.384476
YNL059C	ARP5	1173	0.212928	0.111612	0.233693	0.194912	0.0699987	0.0671905	0.176273	0.191772	0.155056	0.126366	0.12764	0.193376	0.115941	0.134398	0.280475	0.217507	0.322857	0.204281	0.431755
YGL115W	SNF4	1174	0.1013	0.137185	0.0747376	0.240414	0.126884	0.0529628	0.201842	0.301052	0.0764604	0.0656088	0.210185	0.201312	0.202556	0.294251	0.408925	0.357803	0.436239	0.416718	0.570808
YCL035C	GRX1	1175	0.283232	0.112236	0.163309	0.181836	0.11918	0.0548565	0.000972858	0.062856	0.0915435	0.269612	0.156542	0.15138	0.25797	0.31652	0.0781453	0.353155	0.161451	0.212291	0.379149
YNL103W	MET4	1176	0.151948	0.0737487	0.186567	0.178102	0.184921	0.0224921	0.111272	0.145451	0.142062	0.0662082	0.114882	0.123675	0.0614038	0.112131	0.119643	0.165714	0.113854	0.135528	0.349294
YBR247C	ENP1	1177	0.143924	0.12916	0.270645	0.213739	0.169184	0.110201	0.313834	0.00865244	0.162396	0.130273	0.137585	0.0794981	0.167749	0.489648	0.658987	0.40044	0.576729	0.395651	0.626655
YDL224C	WHI4	1178	0.103441	0.0134824	0.023529	0.130427	0.0620824	0.0804074	0.00369934	0.174341	0.152525	0.183176	0.136976	0.245686	0.122615	0.179617	0.144855	0.153988	0.148863	0.199394	0.214778
YPL009C	RQC2	1179	0.262685	0.0724886	0.226327	0.290165	0.0133287	0.102434	0.0855685	0.234542	0.2095	0.140447	0.130576	0.145488	0.104783	0.248338	0.301577	0.34918	0.265886	0.186591	0.411764
YNL032W	SIW14	1180	0.126251	0.0732976	0.145536	0.147342	0.0731569	0.110714	0.0393188	0.321513	0.229281	0.0066815	0.133652	0.0840851	0.238829	0.394516	0.268686	0.509867	0.654236	0.274699	0.667112
YDR101C	ARX1	1181	0.14721	0.169059	0.180628	0.226549	0.055585	0.117554	0.19625	0.0647253	0.15423	0.0224415	0.10402	0.111894	0.137276	0.472187	0.688223	0.471803	0.616122	0.430508	0.677337
YER019C-A	SBH2	1182	0.194195	0.177822	0.11336	0.152245	0.111839	0.131564	0.0147866	0.377085	0.412165	0.00895866	0.0487421	0.139507	0.141561	0.492469	0.434097	0.344586	0.461695	0.536693	0.830273
YLR384C	IKI3	1183	0.133871	0.062701	0.0749293	0.132159	0.0355612	0.0327577	0.10807	0.155637	0.101707	0.124534	0.146027	0.173717	0.0743067	0.280339	0.42094	0.416546	0.404152	0.301542	0.513067
YJR005W	APL1	1184	0.060504	0.0899148	0.0980179	0.180531	0.0452024	0.0362618	0.00716151	0.203367	0.0791528	0.144089	0.095392	0.113602	0.156065	0.199495	0.547387	0.387557	0.42404	0.338261	0.555422
YOR147W	MDM32	1185	0.101677	0.0284029	0.030283	0.11755	0.0286969	0.0221768	0.0426416	0.263362	0.0399423	0.168505	0.193324	0.143711	0.189318	0.148914	0.380989	0.29803	0.363573	0.221046	0.412644
YPR113W	PIS1	1186	0.102918	0.130483	0.143606	0.191599	0.0539277	0.114671	0.0204397	0.0121116	0.201617	0.116955	0.0846318	0.102201	0.164133	0.262093	0.335974	0.20766	0.331388	0.5142	0.446744
YAR002C-A	ERP1	1187	0.137257	0.230548	0.142566	0.23563	0.128989	0.0847534	0.0650547	0.331431	0.261941	0.107147	0.129455	0.244673	0.255959	0.293742	0.384626	0.491065	0.435522	0.438207	0.514012
YIL052C	RPL34B	1188	0.0988113	0.153227	0.144085	0.136249	0.0779059	0.046759	0.0781245	0.307803	0.192904	0.0515486	0.0706044	0.0384364	0.167317	0.432387	0.309045	0.289928	0.597934	0.422797	0.676941
YOR098C	NUP1	1189	0.150965	0.145906	0.125086	0.125392	0.102184	0.0197051	0.0987664	0.146404	0.122222	0.0946703	0.147152	0.137075	0.0756876	0.195919	0.353643	0.125079	0.191891	0.219003	0.398228
YGL080W	MPC1	1190	0.0906893	0.164141	0.146265	0.268146	0.110799	0.16444	0.0505788	0.073707	0.184166	0.292982	0.0662159	0.126961	0.345273	0.352226	0.311307	0.100881	0.379463	0.270879	0.438636
YHL001W	RPL14B	1191	0.12817	0.200084	0.170538	0.211907	0.0416712	0.121886	0.114091	0.161465	0.135019	0.170841	0.108605	0.101128	0.333976	0.401026	0.268353	0.313431	0.393336	0.505715	0.733335
YLL010C	PSR1	1192	0.192423	0.0329687	0.194215	0.201365	0.116566	0.0355409	0.203801	0.174341	0.137061	0.0717055	0.141227	0.171369	0.102419	0.127327	0.114134	0.102148	0.0635947	0.206923	0.247725
YER048C	CAJ1	1193	0.16284	0.0829228	0.153858	0.184385	0.0295497	0.0961346	0.0449541	0.0117771	0.186815	0.110823	0.22421	0.149446	0.258369	0.224375	0.139298	0.290459	0.24897	0.122319	0.469042
YDR257C	RKM4	1194	0.0701603	0.116621	0.186984	0.116289	0.0564447	0.0893734	0.106598	0.27437	0.0221238	0.145389	0.209673	0.186181	0.199811	0.277328	0.38318	0.438974	0.345695	0.226347	0.470951
YGR078C	PAC10	1195	0.138346	0.167127	0.231328	0.116351	0.0677807	0.0832643	0.262862	0.18004	0.302256	0.129677	0.169295	0.128726	0.253846	0.361551	0.386768	0.243417	0.201795	0.353106	0.425464
YHR108W	GGA2	1196	0.156392	0.113551	0.197342	0.266946	0.0477294	0.0834888	0.0941162	0.178996	0.050941	0.148807	0.0853898	0.127156	0.12502	0.207372	0.130868	0.149428	0.0423001	0.253058	0.432726
YCR077C	PAT1	1197	0.127094	0.115633	0.148066	0.139034	0.0622368	0.0546602	0.0358918	0.133352	0.0682825	0.247221	0.1389	0.102157	0.150375	0.202547	0.262795	0.219966	0.275007	0.232877	0.382031
YEL063C	CAN1	1198	0.0850184	0.0869382	0.0129639	0.17791	0.0716695	0.0444915	0.0369709	0.333393	0.0718408	0.078926	0.126741	0.251475	0.0649727	0.0130483	0.117201	0.0815468	0.0694483	0.144753	0.27091
YML004C	GLO1	1199	0.148205	0.141316	0.135249	0.230628	0.0953166	0.0752633	0.0765822	0.102352	0.175226	0.308414	0.0950867	0.0488621	0.177372	0.305296	0.326068	0.275541	0.107817	0.344918	0.377778
YPR163C	TIF3	1200	0.215219	0.141003	0.236411	0.205964	0.0453539	0.116508	0.210959	0.186834	0.128379	0.0505903	0.131866	0.0765746	0.0903209	0.31408	0.340975	0.320614	0.424591	0.388642	0.444355
YGR134W	CAF130	1201	0.0986933	0.0303706	0.073619	0.175045	0.0326519	0.0596849	0.0997762	0.10428	0.0405527	0.157685	0.159552	0.128692	0.141655	0.211986	0.288367	0.345328	0.440669	0.235455	0.418126
YJR060W	CBF1	1202	0.19962	0.095828	0.30623	0.212463	0.159217	0.0695391	0.154707	0.169891	0.105713	0.168144	0.177752	0.21614	0.155092	0.330281	0.0600655	0.166108	0.100598	0.257873	0.320825
YBL039C	URA7	1203	0.156891	0.21797	0.184194	0.147385	0.0678987	0.122055	0.20812	0.251169	0.126731	0.0604183	0.162464	0.08994	0.15371	0.449421	0.79801	0.449262	0.640667	0.467011	0.66092
YBR181C	RPS6B	1204	0.040809	0.104059	0.189093	0.246512	0.0624958	0.0954031	0.162968	0.118377	0.231349	0.068584	0.0916105	0.0501193	0.170007	0.360138	0.327848	0.411794	0.402814	0.428808	0.742518
YNL155W	CUZ1	1205	0.28477	0.158187	0.243347	0.314516	0.0164382	0.0478206	0.0345354	0.168146	0.127732	0.0967252	0.0968723	0.0863484	0.24272	0.230172	0.220259	0.4269	0.381991	0.376497	0.751875
YHL003C	LAG1	1206	0.0893467	0.101366	0.0854991	0.239324	0.122528	0.121524	0.0150143	0.193387	0.121261	0.169581	0.152361	0.166125	0.229007	0.294199	0.48289	0.392655	0.409883	0.369077	0.552295
YIL021W	RPB3	1207	0.199829	0.140631	0.11216	0.188674	0.0592787	0.0669147	0.127163	0.204696	0.134283	0.140483	0.0934349	0.0858299	0.0279437	0.250267	0.355332	0.248076	0.458261	0.399464	0.509893
YFR039C	OSW7	1208	0.147635	0.192007	0.147731	0.205518	0.0634001	0.0446126	0.0482455	0.0955994	0.0581658	0.144183	0.134712	0.119822	0.11324	0.274079	0.268612	0.374172	0.3071	0.288867	0.243404
YKL088W	CAB3	1209	0.1851	0.132142	0.120381	0.137729	0.12329	0.0963368	0.0804161	0.216514	0.17451	0.153914	0.183939	0.135773	0.23327	0.134019	0.135715	0.100498	0.0837251	0.131948	0.155493
YDL058W	USO1	1210	0.222491	0.0402782	0.263355	0.232047	0.101666	0.106928	0.116075	0.0994054	0.14674	0.157529	0.173487	0.152126	0.132652	0.238525	0.343281	0.382859	0.327867	0.201507	0.429066
YJL154C	VPS35	1211	0.148208	0.0423754	0.17244	0.225517	0.0805332	0.0462446	0.0813273	0.199792	0.0656185	0.21871	0.207555	0.10553	0.155374	0.112448	0.102486	0.212713	0.148898	0.192321	0.338188
YGR186W	TFG1	1212	0.275462	0.159349	0.18505	0.232112	0.0484079	0.0545032	0.0572199	0.0647744	0.130491	0.164711	0.0827669	0.117942	0.15689	0.176741	0.153977	0.200099	0.269137	0.162833	0.309034
YJL041W	NSP1	1213	0.209223	0.121244	0.239239	0.220503	0.0611361	0.030704	0.108678	0.162665	0.0910898	0.177659	0.162483	0.105039	0.0962441	0.139265	0.298392	0.192912	0.16432	0.205725	0.383013
YKR082W	NUP133	1214	0.120533	0.0745664	0.144261	0.21432	0.0151419	0.0561503	0.0757538	0.244382	0.0687532	0.135075	0.152127	0.132597	0.104188	0.182766	0.45102	0.387661	0.393861	0.308143	0.577179
YDR176W	NGG1	1215	0.167003	0.103785	0.225384	0.202305	0.11587	0.0098165	0.179596	0.0626406	0.194777	0.116073	0.209091	0.0836428	0.137843	0.166369	0.15705	0.147696	0.217474	0.128994	0.408955
YCR008W	SAT4	1216	0.134196	0.0543955	0.0515735	0.15298	0.0475134	0.0136138	0.0612258	0.237815	0.0735276	0.139475	0.146868	0.165477	0.0553887	0.179424	0.197477	0.249494	0.0931707	0.204212	0.424797
YOR327C	SNC2	1217	0.270653	0.27057	0.36186	0.280248	0.0765497	0.186311	0.308135	0.119993	0.21126	0.161768	0.0972206	0.165059	0.334732	0.490018	0.413985	0.226519	0.524542	0.626094	0.667112
YCR106W	RDS1	1218	0.145407	0.0553416	0.0944679	0.162821	0.0226045	0.0385125	0.0937734	0.148784	0.0512899	0.230547	0.136823	0.669815	0.143429	0.224108	0.211393	0.310305	0.213423	0.239537	0.50247
YMR054W	STV1	1219	0.108763	0.0475564	0.112403	0.164688	0.0654988	0.0859426	0.0459261	0.212063	0.119154	0.224198	0.0930379	0.2045	0.158461	0.197081	0.172632	0.274118	0.226566	0.127373	0.364995
YOR342C	YOR342C	1220	0.139586	0.100349	0.157785	0.222417	0.102962	0.074446	0.0369933	0.252998	0.131345	0.115687	0.138123	0.195507	0.289496	0.276319	0.343664	0.171826	0.267333	0.360236	0.474843
YLR190W	MMR1	1221	0.190345	0.119237	0.101667	0.274272	0.0773473	0.0264279	0.0516724	0.232041	0.110366	0.10913	0.150866	0.131526	0.239562	0.131073	0.397557	0.220417	0.172302	0.232416	0.48803
YHR065C	RRP3	1222	0.181505	0.0574186	0.237913	0.163702	0.0534356	0.0785055	0.234468	0.0121116	0.330021	0.117424	0.138344	0.199151	0.128425	0.376545	0.518282	0.367036	0.484675	0.31552	0.626562
YAR002W	NUP60	1223	0.144418	0.136766	0.219926	0.255183	0.0392121	0.0428488	0.112126	0.17037	0.0830336	0.0572576	0.1441	0.095943	0.231223	0.26635	0.319654	0.209287	0.253388	0.282219	0.386992
YLR008C	PAM18	1224	0.303959	0.153936	0.15799	0.181695	0.044308	0.0106611	0.0712695	0.131308	0.017421	0.000516461	0.0587926	0.0252715	0.11591	0.508186	0.500808	0.608029	0.623133	0.470471	0.427089
YJL171C	YJL171C	1225	0.116021	0.0746462	0.090817	0.18532	0.0719785	0.121469	0.016014	0.0782528	0.0721523	0.163451	0.12672	0.263339	0.127235	0.103314	0.0407315	0.120846	0.0393672	0.195845	0.232797
YDR351W	SBE2	1226	0.115821	0.0233957	0.155474	0.14313	0.0959544	0.0674152	0.16569	0.169857	0.0835164	0.109533	0.0622974	0.066696	0.127145	0.10577	0.259001	0.201397	0.278863	0.147564	0.367527
YPL228W	CET1	1227	0.207542	0.0848464	0.226224	0.292849	0.101014	0.030473	0.000619203	0.230577	0.0862281	0.275362	0.0948362	0.114593	0.159134	0.217815	0.261096	0.168401	0.11077	0.1396	0.344606
YGR145W	ENP2	1228	0.167341	0.0661821	0.295185	0.213875	0.160342	0.108209	0.301908	0.297953	0.169555	0.0192406	0.122323	0.123876	0.103796	0.481621	0.815619	0.52928	0.765837	0.438079	0.816606
YMR062C	ARG7	1229	0.0862114	0.164895	0.140274	0.13991	0.0460372	0.139908	0.0723603	0.0425993	0.214296	0.0216253	0.0660084	0.140222	0.0904214	0.174956	0.33981	0.562116	0.522425	0.410315	0.546362
YDR003W	RCR2	1230	0.200469	0.198406	0.163679	0.204362	0.112603	0.145466	0.080002	0.125585	0.0801364	0.0282673	0.147634	0.0443317	0.229609	0.150422	0.104791	0.212468	0.408196	0.257392	0.159019
YDR519W	FPR2	1231	0.134839	0.361464	0.112983	0.204863	0.229068	0.0393269	0.0711791	0.0449799	0.192702	0.412389	0.0347174	0.0742305	0.347215	0.151614	0.811931	0.465789	0.556974	0.599377	0.71624
YHR099W	TRA1	1232	0.204624	0.10803	0.126674	0.191757	0.0315047	0.0584947	0.074101	0.123206	0.0951634	0.13721	0.195592	0.0474021	0.201885	0.25275	0.370054	0.326496	0.292371	0.262074	0.501875
YKL065C	YET1	1233	0.187931	0.114051	0.200621	0.25653	0.0581061	0.0973406	0.0842159	0.0394018	0.221425	0.151012	0.0740904	0.143431	0.290158	0.233096	0.105209	0.181112	0.067285	0.0909834	0.0779764
YKL094W	YJU3	1234	0.192391	0.128608	0.149362	0.236217	0.101467	0.102613	0.0634456	0.106441	0.137359	0.000967408	0.143991	0.0216324	0.0715557	0.123186	0.340931	0.213906	0.159009	0.135366	0.461819
YGR033C	TIM21	1235	0.17685	0.0326441	0.129648	0.219141	0.163281	0.00824445	0.0816538	0.103939	0.100278	0.249751	0.128658	0.0950108	0.159479	0.305353	0.284128	0.285736	0.107817	0.288621	0.432833
YMR100W	MUB1	1236	0.107091	0.0780142	0.10819	0.129187	0.0556176	0.0255003	0.0654329	0.219589	0.0689155	0.116127	0.138051	0.115118	0.105935	0.170146	0.21836	0.284266	0.342388	0.0844181	0.381289
YHR199C	AIM46	1237	0.122535	0.0658794	0.163865	0.341106	0.0762673	0.117267	0.0709805	0.0609012	0.176392	0.0414424	0.0715149	0.183425	0.105207	0.222191	0.204858	0.239017	0.222567	0.440431	0.340755
YKL020C	SPT23	1238	0.148132	0.0519257	0.0894084	0.132699	0.0924385	0.0256327	0.0153423	0.25515	0.169928	0.154318	0.163752	0.148553	0.0160217	0.235689	0.200863	0.161135	0.135029	0.177043	0.374508
YIL022W	TIM44	1239	0.241532	0.105617	0.114117	0.11283	0.084481	0.0656714	0.153593	0.0752378	0.176736	0.0583289	0.10848	0.123656	0.066537	0.174057	0.07695	0.0416524	0.140609	0.0640278	0.240512
YJL143W	TIM17	1240	0.199489	0.17401	0.113537	0.197668	0.126941	0.146791	0.0319635	0.0336858	0.0415783	0.157576	0.0418459	0.0719718	0.190806	0.598046	0.234579	0.388553	0.407951	0.493713	0.37665
YLR409C	UTP21	1241	0.135602	0.143506	0.156383	0.152399	0.0565953	0.0468	0.211754	0.146965	0.0954104	0.0318351	0.12936	0.114944	0.157814	0.360309	0.594935	0.491821	0.507357	0.447373	0.635505
YJL117W	PHO86	1242	0.134626	0.147701	0.188868	0.122449	0.081749	0.0802021	0.0183915	0.0418593	0.149582	0.123137	0.0956016	0.0837534	0.370329	0.53691	0.584076	0.515417	0.548476	0.505931	0.797616
YPL094C	SEC62	1243	0.173248	0.0632434	0.238925	0.170484	0.0258647	0.0172747	0.0188891	0.277222	0.18692	0.0846272	0.0471842	0.151781	0.265372	0.208135	0.223719	0.368631	0.396448	0.313809	0.503971
YGL014W	PUF4	1244	0.171442	0.0549094	0.132053	0.203525	0.0529587	0.0411757	0.0368312	0.1038	0.0558343	0.180077	0.133429	0.17848	0.131361	0.152986	0.275862	0.232879	0.259511	0.210206	0.380538
YHR111W	UBA4	1245	0.156176	0.0428889	0.171085	0.246161	0.047742	0.0766431	0.0561882	0.178662	0.229507	0.227072	0.128087	0.10149	0.157789	0.253484	0.446109	0.352988	0.105637	0.204056	0.465245
YGR040W	KSS1	1246	0.186891	0.141604	0.0561104	0.183835	0.0785566	0.0813469	0.0689483	0.25857	0.155016	0.109286	0.106738	0.176144	0.0528257	0.168491	0.180776	0.113348	0.190067	0.275268	0.362624
YIL115C	NUP159	1247	0.166105	0.0646139	0.158403	0.257546	0.0329597	0.0580539	0.100199	0.205012	0.0988341	0.153951	0.175386	0.152502	0.109282	0.255567	0.293964	0.300669	0.337841	0.224462	0.427754
YPL013C	MRPS16	1248	0.342982	0.156227	0.187089	0.273357	0.0505617	0.110229	0.0271086	0.183628	0.272195	0.0638794	0.0875054	0.151968	0.283394	0.335382	0.112825	0.0740081	0.588131	0.445485	0.177163
YJL050W	MTR4	1249	0.173192	0.107135	0.224874	0.16597	0.130131	0.0970641	0.209849	0.284216	0.087584	0.133822	0.153932	0.205232	0.119775	0.368156	0.546031	0.41326	0.489022	0.389957	0.698438
YLR395C	COX8	1250	0.310403	0.146532	0.125991	0.196554	0.0524485	0.104306	0.204429	0.0708575	0.251035	0.273533	0.146124	0.105524	0.446211	0.360318	0.224529	0.193094	0.292634	0.509563	0.229496
YJL145W	SFH5	1251	0.166498	0.179058	0.313916	0.269427	0.0740702	0.124293	0.151489	0.00399521	0.121539	0.191975	0.0493979	0.0459564	0.13016	0.344092	0.498137	0.363159	0.225637	0.467096	0.80626
YLR056W	ERG3	1252	0.117374	0.0974858	0.215463	0.236082	0.107411	0.0159144	0.143216	0.193746	0.130422	0.0183014	0.162616	0.161327	0.508884	0.67897	0.838167	0.703297	0.765053	0.790143	0.825507
YJR016C	ILV3	1253	0.20538	0.0999215	0.138304	0.167669	0.0428712	0.101134	0.182493	0.0450515	0.14952	0.017173	0.06565	0.0749833	0.0402918	0.319937	0.335514	0.256159	0.215125	0.207348	0.378047
YNL149C	PGA2	1254	0.372147	0.214514	0.169651	0.312897	0.0739872	0.0363275	0.216684	0.00791885	0.204395	0.187145	0.0810151	0.1758	0.0721891	0.444976	0.51265	0.645453	0.639545	0.504152	0.616039
YGR198W	YPP1	1255	0.147315	0.0407798	0.175808	0.215439	0.0705382	0.0673593	0.125177	0.0985842	0.138479	0.0818804	0.135448	0.153736	0.0992142	0.157915	0.405648	0.17994	0.17785	0.132124	0.385222
YLR295C	ATP14	1256	0.151734	0.104127	0.140946	0.122692	0.062887	0.0593712	0.150954	0.101686	0.0928546	0.248662	0.139946	0.135861	0.181393	0.203466	0.0229606	0.0416188	0.178005	0.386844	0.535141
YOR207C	RET1	1257	0.156422	0.0579589	0.146552	0.20179	0.037369	0.0790031	0.166558	0.155034	0.168731	0.194851	0.159135	0.161063	0.129643	0.377642	0.653747	0.446546	0.536236	0.450649	0.585456
YJL212C	OPT1	1258	0.253864	0.269096	0.502678	0.604593	0.015939	0.108277	0.288712	0.290935	0.157325	0.064617	0.148506	0.210727	0.0427337	0.0895833	0.177036	0.0917743	0.027795	0.160417	0.206259
YPL259C	APM1	1259	0.178468	0.0848221	0.127622	0.242572	0.0501321	0.0579858	0.18637	0.175632	0.0828067	0.170664	0.172061	0.218303	0.150489	0.235935	0.292168	0.242222	0.401882	0.237878	0.371686
YDR083W	RRP8	1260	0.250261	0.046602	0.295621	0.211966	0.245499	0.120421	0.308811	0.0558955	0.262695	0.0146575	0.186421	0.0496485	0.0883362	0.499848	0.618274	0.445545	0.529686	0.483004	0.575177
YLR058C	SHM2	1261	0.0703308	0.00499411	0.274149	0.230603	0.111849	0.057949	0.344553	0.542306	0.273153	0.254873	0.110072	0.206443	0.163166	0.371224	0.121548	0.0439674	0.0910336	0.298649	0.526084
YKL205W	LOS1	1262	0.11895	0.0357914	0.142998	0.172295	0.0204615	0.105674	0.182652	0.264372	0.0820999	0.124026	0.198645	0.119085	0.0577108	0.295928	0.489838	0.413307	0.38207	0.38414	0.59506
YLR398C	SKI2	1263	0.129073	0.101877	0.119433	0.154225	0.0499228	0.0359407	0.0516299	0.148873	0.110927	0.114894	0.152029	0.167281	0.157433	0.202583	0.305112	0.323739	0.294559	0.221394	0.507079
YPR159W	KRE6	1264	0.0847321	0.095898	0.0611139	0.182099	0.0652293	0.120041	0.0198025	0.26907	0.218648	0.191092	0.141367	0.207702	0.108744	0.165958	0.0963885	0.112624	0.172403	0.149145	0.35896
YLR359W	ADE13	1265	0.136883	0.0837513	0.130908	0.175671	0.0858154	0.0473392	0.137957	0.157069	0.168067	0.183688	0.100348	0.124887	0.134442	0.208025	0.262607	0.252157	0.270988	0.326357	0.464557
YLR344W	RPL26A	1266	0.134875	0.0888107	0.0378343	0.178718	0.1091	0.0890316	0.0369933	0.179716	0.0907768	0.309891	0.113751	0.0432724	0.23398	0.2711	0.184076	0.287159	0.414964	0.457911	0.551211
YJR046W	TAH11	1267	0.189192	0.192456	0.272201	0.376972	0.0586659	0.0641182	0.192562	0.199364	0.119948	0.18105	0.0851734	0.102754	0.120918	0.160613	0.482031	0.265441	0.456642	0.242101	0.497997
YCR057C	PWP2	1268	0.214481	0.172255	0.147747	0.122549	0.0976265	0.0575294	0.266969	0.161546	0.092601	0.0292713	0.105299	0.158558	0.132425	0.37873	0.616539	0.365105	0.43474	0.388333	0.514517
YGL150C	INO80	1269	0.179855	0.0677931	0.177849	0.210306	0.0728039	0.101512	0.0152339	0.145018	0.077636	0.212422	0.186054	0.122559	0.147591	0.231076	0.173093	0.286844	0.206972	0.142109	0.389617
YBL036C	YBL036C	1270	0.115051	0.12131	0.086105	0.125451	0.0571806	0.070078	0.0546671	0.242244	0.0934046	0.101845	0.176048	0.0877791	0.178616	0.395237	0.30205	0.429461	0.509841	0.234775	0.522717
YMR243C	ZRC1	1271	0.122023	0.0883555	0.0904325	0.16197	0.0581258	0.0177951	0.0267415	0.151025	0.186977	0.219342	0.0699705	0.132825	0.108572	0.275894	0.476276	0.296353	0.383049	0.374402	0.54278
YHR103W	SBE22	1272	0.115772	0.0105636	0.105638	0.180306	0.0107094	0.0547263	0.013585	0.159235	0.0657813	0.206177	0.170602	0.133237	0.157192	0.122735	0.231736	0.246464	0.238363	0.208351	0.417695
YIL070C	MAM33	1273	0.062904	0.11388	0.19829	0.266538	0.10011	0.108363	0.0142418	0.241595	0.169189	0.107924	0.104756	0.134953	0.253584	0.235998	0.428149	0.269082	0.373176	0.284875	0.380849
YDR452W	PPN1	1274	0.0479679	0.0398434	0.165294	0.241008	0.0715264	0.0954886	0.0137596	0.216728	0.0914292	0.0248132	0.172911	0.222818	0.325533	0.146362	0.0846356	0.197677	0.0568115	0.0174243	0.288805
YDL047W	SIT4	1275	0.140217	0.116773	0.181266	0.161031	0.00313117	0.0165786	0.0838376	0.0993704	0.28306	0.196668	0.0601249	0.10493	0.152715	0.27975	0.306337	0.20202	0.250623	0.338232	0.317166
YDL040C	NAT1	1276	0.129334	0.0948243	0.124029	0.200315	0.0240431	0.0489922	0.140487	0.0586105	0.0811306	0.144769	0.11606	0.158785	0.0877034	0.226865	0.295032	0.319428	0.272926	0.258168	0.383606
YMR089C	YTA12	1277	0.138327	0.0906649	0.228584	0.235347	0.0245669	0.0294876	0.0907312	0.280751	0.116051	0.118101	0.162671	0.232714	0.131879	0.219348	0.257155	0.271183	0.14911	0.19754	0.407801
YDR055W	PST1	1278	0.0571025	0.114065	0.123046	0.162176	0.108965	0.0820219	0.147567	0.286138	0.194066	0.235971	0.172084	0.217249	0.427884	0.0456271	0.00796397	0.0205103	0.0575498	0.10868	0.128914
YOL006C	TOP1	1279	0.139083	0.0249997	0.163087	0.15634	0.0769	0.0467261	0.155683	0.187445	0.0839435	0.176312	0.104348	0.110991	0.234379	0.199392	0.286742	0.240384	0.269364	0.156835	0.417463
YGR193C	PDX1	1280	0.260816	0.0439098	0.198542	0.214655	0.0793886	0.0487922	0.17939	0.0634217	0.179299	0.159979	0.0561695	0.0928075	0.0905692	0.113775	0.195098	0.0806695	0.0586259	0.26089	0.390254
YBR059C	AKL1	1281	0.157315	0.08845	0.107665	0.206654	0.031286	0.0272051	0.0369933	0.144775	0.108797	0.242193	0.119442	0.19899	0.144436	0.0215544	0.107888	0.139608	0.114765	0.0496936	0.186665
YNR043W	MVD1	1282	0.166969	0.0898929	0.121256	0.209815	0.0226046	0.105032	0.0679898	0.0974086	0.183518	0.30184	0.149825	0.089742	0.187843	0.369596	0.320216	0.36293	0.364781	0.359236	0.577179
YJR010W	MET3	1283	0.290635	0.136577	0.413484	0.195945	0.0279387	0.0912689	0.756323	0.874023	0.15794	0.207041	0.141644	0.279869	0.259732	0.22659	0.111236	0.353348	0.0690888	0.285431	0.360391
YPL028W	ERG10	1284	0.135464	0.121701	0.0898026	0.106553	0.141922	0.100744	0.109285	0.0578859	0.284805	0.121078	0.0714644	0.100836	0.312871	0.23818	0.0752588	0.262586	0.185492	0.239092	0.468221
YJR041C	URB2	1285	0.107915	0.0688378	0.194228	0.22031	0.0270187	0.0851977	0.240289	0.174251	0.151801	0.116637	0.186056	0.0860685	0.0448169	0.332863	0.710753	0.486108	0.515971	0.353409	0.695268
YDR385W	EFT2	1286	0.146545	0.0919233	0.157773	0.190439	0.0224709	0.0786736	0.210353	0.0546374	0.143088	0.272222	0.18084	0.180763	0.109662	0.274509	0.25812	0.351812	0.166614	0.284288	0.531
YOR304W	ISW2	1287	0.161479	0.0158121	0.151089	0.20385	0.0678104	0.099342	0.112493	0.374974	0.034223	0.0985474	0.108509	0.149065	0.14037	0.208425	0.332162	0.348581	0.388477	0.188436	0.468011
YDR045C	RPC11	1288	0.045821	0.235905	0.204017	0.279252	0.201032	0.123807	0.123701	0.0912897	0.0475185	0.0873212	0.190018	0.0916977	0.145299	0.352226	0.868207	0.543144	0.99794	0.56825	0.843591
YOR216C	RUD3	1289	0.194735	0.115234	0.290783	0.231209	0.0737862	0.089262	0.0979022	0.157697	0.127918	0.0287184	0.264866	0.0969094	0.379437	0.261816	0.129052	0.323245	0.266217	0.241609	0.445288
YDR472W	TRS31	1290	0.134615	0.0931342	0.0587026	0.174127	0.0792885	0.038649	0.106615	0.0899547	0.147965	0.144044	0.18214	0.0860147	0.170483	0.315363	0.179368	0.211985	0.295623	0.329033	0.463812
YJL004C	SYS1	1291	0.212764	0.195594	0.0692899	0.0854791	0.103155	0.0327876	0.0362712	0.114352	0.128483	0.197354	0.0937243	0.0732499	0.287907	0.225804	0.655543	0.640114	0.491604	0.598949	0.738179
YDR463W	STP1	1292	0.159079	0.0721895	0.156945	0.222063	0.150613	0.0573088	0.194947	0.107761	0.0931069	0.112246	0.111297	0.0744938	0.158319	0.243499	0.102934	0.0132658	0.0386186	0.0616975	0.310077
YDL111C	RRP42	1293	0.108404	0.0486556	0.163208	0.241417	0.0487348	0.0646241	0.198444	0.278589	0.192062	0.132371	0.05315	0.123568	0.0707074	0.358399	0.521593	0.480913	0.387916	0.484812	0.600248
YKL068W	NUP100	1294	0.15147	0.125882	0.129392	0.157547	0.0556316	0.0998457	0.0967793	0.221941	0.0960896	0.00567782	0.16854	0.0925997	0.10549	0.265223	0.379969	0.272418	0.243464	0.268226	0.447104
YGR178C	PBP1	1295	0.123315	0.0910274	0.0792494	0.114277	0.0759857	0.0664863	0.0437401	0.30726	0.0759166	0.11168	0.11303	0.156575	0.299019	0.244333	0.0976551	0.238685	0.206182	0.173048	0.357849
YPL137C	GIP3	1296	0.135901	0.0460788	0.0609288	0.220229	0.0530364	0.039392	0.0476841	0.0089048	0.0532369	0.22099	0.224602	0.14949	0.0967624	0.093109	0.181847	0.0512655	0.171081	0.024749	0.204836
YOR222W	ODC2	1297	0.0680556	0.0605215	0.104485	0.137344	0.146583	0.109329	0.066217	0.053529	0.0962474	0.0120093	0.0514203	0.0385336	0.128649	0.0881557	0.00115468	0.0118357	0.13969	0.099514	0.128847
YGR060W	ERG25	1298	0.10116	0.180077	0.228256	0.224732	0.140464	0.0302663	0.0611405	0.164702	0.118918	0.0568309	0.130122	0.132715	0.19109	0.428639	0.573634	0.598956	0.538814	0.574173	0.7592
YOR107W	RGS2	1299	0.149196	0.104785	0.0593689	0.240292	0.151528	0.321097	0.137751	0.349049	0.178421	0.0212979	0.35872	0.187147	0.1837	0.145292	0.220863	0.0221908	0.171325	0.246614	0.345054
YAR014C	BUD14	1300	0.097383	0.0781435	0.12112	0.122245	0.0780477	0.031805	0.140204	0.148035	0.182315	0.124467	0.0780448	0.201289	0.0924422	0.131081	0.301775	0.248901	0.363213	0.168178	0.349479
YDR320C-A	DAD4	1301	0.251286	0.305171	0.188253	0.217589	0.0901379	0.100307	0.374763	0.142978	0.273181	0.228615	0.267935	0.158694	0.561718	0.456109	0.389453	0.456846	0.200962	0.580906	0.489625
YFR037C	RSC8	1302	0.234233	0.103449	0.194766	0.238745	0.0984637	0.055846	0.129291	0.0144003	0.0985968	0.0193082	0.0790029	0.0236064	0.167336	0.0970412	0.173145	0.100345	0.314407	0.194067	0.364995
YBR088C	POL30	1303	0.124587	0.160575	0.22914	0.14325	0.0880632	0.190814	0.00291769	0.371972	0.15804	0.387677	0.0840428	0.212709	0.489166	0.401842	0.292042	0.294869	0.115487	0.260294	0.418383
YHR206W	SKN7	1304	0.14286	0.100147	0.179375	0.204735	0.100989	0.0623376	0.0880262	0.0816173	0.13655	0.247482	0.152937	0.215598	0.0467031	0.271972	0.405734	0.20599	0.231125	0.183426	0.402718
YDR068W	DOS2	1305	0.243998	0.179372	0.256656	0.233293	0.0988009	0.102997	0.0316798	0.179816	0.181423	0.121833	0.127051	0.209838	0.419932	0.168235	0.290964	0.358277	0.287222	0.21665	0.219856
YCL059C	KRR1	1306	0.186166	0.104029	0.228254	0.2024	0.0826735	0.152148	0.197674	0.0325215	0.22003	0.00183664	0.185048	0.0936393	0.19956	0.457561	0.719368	0.444003	0.462454	0.521289	0.520494
YOR305W	RRG7	1307	0.0907692	0.121389	0.171033	0.124374	0.0423258	0.0784871	0.00720678	0.282674	0.216343	0.0565662	0.154083	0.0131351	0.209097	0.169973	0.37118	0.189725	0.415649	0.29001	0.375449
YJL128C	PBS2	1308	0.145636	0.0489675	0.199623	0.216549	0.0693704	0.0496578	0.158044	0.100077	0.0757824	0.210806	0.128633	0.159313	0.199476	0.162346	0.214383	0.195784	0.249622	0.213606	0.357731
YHR148W	IMP3	1309	0.131497	0.0811187	0.288387	0.176979	0.133675	0.107275	0.300684	0.321113	0.224068	0.0491813	0.0894881	0.123056	0.176305	0.322136	0.829851	0.54269	0.632517	0.472422	0.816318
YAL007C	ERP2	1310	0.108672	0.0294685	0.137615	0.143064	0.0400387	0.179073	0.0332042	0.12583	0.163853	0.300645	0.0172283	0.104109	0.583677	0.310254	0.332986	0.270029	0.366932	0.299473	0.453439
YGL184C	STR3	1311	0.293457	0.244185	0.821409	0.777954	0.0633968	0.0619963	0.584083	0.533176	0.227396	0.0822461	0.203567	0.229654	0.169179	0.154766	0.579439	0.160157	0.204637	0.0120448	0.331668
YHR104W	GRE3	1312	0.200151	0.145369	0.15642	0.272299	0.118483	0.0957669	0.0306104	0.140372	0.278998	0.33766	0.107447	0.149578	0.151089	0.0873571	0.442874	0.108926	0.494437	0.247715	0.306695
YLR418C	CDC73	1313	0.127493	0.100935	0.223741	0.212733	0.0617699	0.0187752	0.0525396	0.135786	0.0845689	0.187075	0.113336	0.156962	0.154061	0.275699	0.318488	0.320133	0.257432	0.269349	0.449657
YNL258C	DSL1	1314	0.186186	0.0734193	0.165862	0.253832	0.0789998	0.0568677	0.0800457	0.223126	0.111302	0.118335	0.160875	0.174061	0.212021	0.206365	0.346915	0.282235	0.191835	0.245205	0.396417
YPR089W	YPR089W	1315	0.188544	0.0872286	0.193836	0.213198	0.0383675	0.0251644	0.18522	0.310283	0.184759	0.167552	0.174628	0.192463	0.0927107	0.193102	0.184332	0.265443	0.205227	0.238798	0.397144
YLL013C	PUF3	1316	0.124302	0.0989129	0.124907	0.200244	0.0461563	0.06563	0.0206613	0.242361	0.0913129	0.203137	0.177301	0.227462	0.0575752	0.210606	0.197275	0.237063	0.159072	0.200085	0.502397
YOL051W	GAL11	1317	0.191799	0.0711847	0.247909	0.292867	0.148834	0.043058	0.14771	0.139733	0.058155	0.211251	0.177863	0.189052	0.157652	0.151227	0.325612	0.111589	0.161767	0.208979	0.290594
YMR047C	NUP116	1318	0.220105	0.137361	0.133379	0.182183	0.056888	0.0647483	0.114147	0.111304	0.133057	0.114447	0.0958527	0.0236773	0.198353	0.164093	0.100944	0.0537949	0.113304	0.0345306	0.246462
YDR298C	ATP5	1319	0.242652	0.161563	0.225967	0.202954	0.146171	0.113094	0.046051	0.183933	0.272675	0.196465	0.0664436	0.105939	0.391682	0.23276	0.0922364	0.211361	0.253251	0.338048	0.551137
YOL098C	YOL098C	1320	0.147365	0.0880652	0.156627	0.15402	0.0394265	0.115241	0.0491562	0.18707	0.110752	0.205072	0.231574	0.151904	0.175591	0.284564	0.423443	0.407843	0.295215	0.322317	0.603456
YAL041W	CDC24	1321	0.115726	0.0324161	0.133648	0.191858	0.0621466	0.0887258	0.180653	0.17245	0.0441461	0.149133	0.116945	0.187157	0.200847	0.155809	0.25848	0.227156	0.244827	0.182937	0.311782
YOR243C	PUS7	1322	0.147704	0.129368	0.257987	0.156288	0.0554152	0.0984794	0.103911	0.0196941	0.0662537	0.0352329	0.13509	0.0954156	0.0910383	0.36052	0.608829	0.429355	0.437884	0.373805	0.589369
YGR195W	SKI6	1323	0.166342	0.113694	0.113932	0.235689	0.0526111	0.0420282	0.323122	0.0800173	0.120847	0.0129309	0.135392	0.0754813	0.146313	0.259829	0.660464	0.247611	0.453371	0.269061	0.266171
YHL007C	STE20	1324	0.183721	0.122559	0.189224	0.179673	0.157063	0.0188144	0.172967	0.13512	0.065612	0.0785246	0.21454	0.171236	0.146391	0.19382	0.237638	0.194553	0.345135	0.226094	0.404784
YLR248W	RCK2	1325	0.186409	0.100966	0.134905	0.147428	0.0132869	0.0198702	0.0939846	0.121672	0.13205	0.0955186	0.104625	0.191589	0.0299579	0.154203	0.199528	0.292519	0.219311	0.206867	0.452739
YKL101W	HSL1	1326	0.151526	0.064426	0.177905	0.222918	0.0935634	0.0433405	0.0285913	0.207125	0.118689	0.180571	0.140809	0.188174	0.210386	0.200512	0.164613	0.191985	0.0359752	0.143518	0.29178
YOL126C	MDH2	1327	0.190977	0.0532637	0.0838241	0.204091	0.104357	0.274545	0.0382495	0.0274968	0.0885577	0.0954183	0.17329	0.0998087	0.235576	0.452551	0.504984	0.548619	0.467626	0.403948	0.532345
YBR256C	RIB5	1328	0.200738	0.0265907	0.156522	0.188192	0.174541	0.106131	0.151131	0.0327756	0.189563	0.113542	0.167699	0.119166	0.225567	0.236086	0.0706516	0.251638	0.0688475	0.0519509	0.0843902
YGR280C	PXR1	1329	0.220166	0.0690391	0.373337	0.198801	0.169975	0.173515	0.331348	0.204806	0.320096	0.0600303	0.229294	0.117383	0.168541	0.311447	0.799362	0.406689	0.53441	0.383518	0.553799
YFL008W	SMC1	1330	0.18355	0.0782105	0.245932	0.223379	0.0540415	0.0736226	0.108446	0.270726	0.181461	0.182788	0.188481	0.19529	0.399625	0.176659	0.279869	0.35632	0.274516	0.199425	0.328786
YBL026W	LSM2	1331	0.270803	0.189601	0.332115	0.219168	0.122719	0.0563448	0.0314762	0.346557	0.190079	0.169893	0.034947	0.120352	0.102697	0.16769	0.598622	0.341825	0.785	0.430409	0.683302
YPL271W	ATP15	1332	0.378944	0.344348	0.114437	0.431506	0.0747746	0.111745	0.0874192	0.26907	0.0862618	0.11702	0.164244	0.147235	0.157892	0.30095	0.169811	0.306391	0.0429799	0.255967	0.415265
YLR314C	CDC3	1333	0.0895758	0.0780912	0.222361	0.163872	0.0772548	0.0430472	0.0519838	0.224302	0.145651	0.112574	0.0824274	0.0995034	0.0415156	0.314593	0.303129	0.26547	0.135223	0.123569	0.482245
YOL119C	MCH4	1334	0.160449	0.090647	0.264454	0.155791	0.0821657	0.0410951	0.0641418	0.0336417	0.21794	0.0667169	0.129745	0.114005	0.169983	0.120057	0.0379426	0.035034	0.120511	0.0560921	0.188158
YMR319C	FET4	1335	0.115104	0.0970385	0.262767	0.248789	0.0497974	0.0482697	0.163856	0.479729	0.207681	0.0810711	0.259641	0.230113	0.327149	0.237718	0.266521	0.21561	0.265647	0.301797	0.397302
YLR224W	YLR224W	1336	0.227235	0.0267305	0.0706525	0.184802	0.0373337	0.0720255	0.128887	0.0418233	0.0622976	0.200654	0.0960495	0.171649	0.192684	0.273238	0.434097	0.319977	0.330368	0.282441	0.49642
YNL138W	SRV2	1337	0.134656	0.0476934	0.11379	0.195408	0.0702803	0.0955125	0.011344	0.156489	0.213646	0.207936	0.142999	0.180913	0.207286	0.0298851	0.113452	0.0882146	0.0653643	0.054351	0.347868
YLR410W	VIP1	1338	0.165252	0.0807779	0.0941129	0.191611	0.0198683	0.025675	0.105677	0.221852	0.115344	0.180056	0.151457	0.182931	0.0174672	0.314976	0.463964	0.375938	0.308507	0.295732	0.575633
YDR227W	SIR4	1339	0.206772	0.0660687	0.219627	0.205219	0.113016	0.0576392	0.211542	0.172696	0.0359779	0.122456	0.208405	0.129973	0.184715	0.25977	0.339816	0.200582	0.266693	0.248873	0.486696
YGL101W	YGL101W	1340	0.240128	0.165648	0.0875984	0.255765	0.0633226	0.060663	0.0583308	0.201199	0.197473	0.29306	0.102348	0.0464531	0.320204	0.450709	0.358863	0.24242	0.402244	0.287623	0.347794
YBR249C	ARO4	1341	0.115055	0.169157	0.0759638	0.0470571	0.0700706	0.150038	0.206307	0.112194	0.148806	0.0024564	0.0426302	0.022452	0.118087	0.180415	0.173221	0.158015	0.163578	0.133793	0.117831
YNR067C	DSE4	1342	0.089172	0.0692471	0.103306	0.24641	0.121363	0.077653	0.00838442	0.257623	0.20491	0.175173	0.149542	0.203577	0.438603	0.138659	0.172822	0.232594	0.165678	0.0870085	0.324841
YNL001W	DOM34	1343	0.0503787	0.0700355	0.161545	0.203231	0.0137692	0.0810267	0.128956	0.203571	0.074328	0.197386	0.109278	0.0668096	0.0825463	0.328716	0.55457	0.442648	0.642177	0.332042	0.616039
YDR006C	SOK1	1344	0.100167	0.0320482	0.122335	0.158751	0.0884653	0.0367783	0.216939	0.0697992	0.0271703	0.109945	0.146943	0.173398	0.0860834	0.182668	0.310876	0.17279	0.219867	0.286731	0.453193
YBR287W	YBR287W	1345	0.0981021	0.0614099	0.106607	0.0803344	0.156523	0.101801	0.121755	0.169971	0.0798334	0.238088	0.238251	0.20875	0.176848	0.274334	0.199049	0.293047	0.326838	0.179491	0.518876
YNL004W	HRB1	1346	0.121662	0.0682078	0.127569	0.174819	0.133368	0.0854156	0.0292906	0.153655	0.120549	0.00627609	0.12323	0.197903	0.109056	0.191292	0.0544275	0.191638	0.0498548	0.075585	0.275453
YKL190W	CNB1	1347	0.122196	0.0673601	0.0881048	0.213654	0.0862313	0.0994695	0.138621	0.26907	0.343888	0.330731	0.0627592	0.134724	0.249009	0.238143	0.0123018	0.339438	0.438106	0.1624	0.380849
YOR162C	YRR1	1348	0.191684	0.119801	0.115021	0.256126	0.0423023	0.0280319	0.144206	0.0112939	0.0703146	0.1112	0.13189	0.112883	0.0418788	0.0568418	0.101816	0.020038	0.0553305	0.0719536	0.0803035
YOR212W	STE4	1349	0.194255	0.0678537	0.165403	0.157355	0.128009	0.0595971	0.0172664	0.165691	0.0344542	0.121116	0.140135	0.0854469	0.283512	0.250612	0.396286	0.346562	0.151275	0.202904	0.407224
YGR191W	HIP1	1350	0.117424	0.0907317	0.0842286	0.119003	0.0536486	0.0636381	0.0458136	0.313482	0.127585	0.0647951	0.117107	0.185029	0.126728	0.245704	0.483566	0.255691	0.271352	0.28143	0.497794
YER008C	SEC3	1351	0.230522	0.099393	0.196158	0.222141	0.0907041	0.043495	0.114606	0.211011	0.139967	0.243481	0.153887	0.127471	0.0275492	0.21004	0.306705	0.320976	0.220999	0.181407	0.418805
YKL058W	TOA2	1352	0.150537	0.113804	0.169151	0.174491	0.139421	0.138653	0.131776	0.042268	0.268363	0.119295	0.105322	0.141145	0.340023	0.605843	0.365571	0.402726	0.449389	0.431129	0.245809
YGL246C	RAI1	1353	0.114024	0.223292	0.161092	0.199867	0.0622174	0.0254886	0.129636	0.0564216	0.120071	0.173955	0.106705	0.0954388	0.258373	0.257488	0.559733	0.445116	0.401739	0.428492	0.462299
YNL132W	KRE33	1354	0.0984611	0.140244	0.169592	0.145548	0.051284	0.124275	0.171093	0.236313	0.175568	0.115463	0.143767	0.153607	0.064184	0.354053	0.547061	0.394774	0.418831	0.322147	0.668515
YOR244W	ESA1	1355	0.172521	0.044708	0.226672	0.26387	0.108265	0.03445	0.0538986	0.229914	0.19444	0.153316	0.19624	0.0608338	0.070636	0.106552	0.287807	0.246129	0.255769	0.29586	0.356464
YDR507C	GIN4	1356	0.155968	0.0802277	0.177716	0.216023	0.157706	0.0790917	0.114853	0.274229	0.0708827	0.152003	0.155795	0.192486	0.21125	0.256698	0.224451	0.240482	0.131729	0.208264	0.34233
YKL061W	BLI1	1357	0.142688	0.0165171	0.17472	0.159023	0.148685	0.089003	0.0689483	0.00744065	0.0867277	0.114583	0.0778709	0.114481	0.366642	0.297752	0.23906	0.294869	0.125482	0.328454	0.580851
YJR003C	YJR003C	1358	0.100216	0.0672779	0.156219	0.153137	0.00560535	0.00891659	0.0828248	0.143589	0.105448	0.0837625	0.140143	0.114926	0.227739	0.303226	0.590077	0.407421	0.602983	0.427734	0.490913
YNL263C	YIF1	1359	0.172903	0.0876667	0.204912	0.262651	0.00436841	0.205026	0.0026416	0.151025	0.108808	0.326537	0.122413	0.190706	0.206222	0.0260536	0.266755	0.171235	0.157037	0.202336	0.465569
YNL192W	CHS1	1360	0.100841	0.0592648	0.0917862	0.117203	0.033496	0.0375079	0.00464749	0.125343	0.0692749	0.0266495	0.113121	0.184577	0.115661	0.0474064	0.0511093	0.270302	0.240695	0.0958091	0.252087
YJL036W	SNX4	1361	0.189896	0.184267	0.130823	0.248922	0.0827233	0.0564329	0.00586632	0.162665	0.153007	0.305312	0.0875588	0.184452	0.112813	0.0803031	0.187829	0.185357	0.389835	0.0865026	0.20774
YOL012C	HTZ1	1362	0.202073	0.071093	0.0583522	0.160438	0.0450789	0.0503988	0.0580783	0.016564	0.216239	0.0430719	0.153188	0.135383	0.27727	0.402849	0.167275	0.243089	0.434012	0.452442	0.777823
YNL297C	MON2	1363	0.165388	0.0666435	0.109389	0.181223	0.0698999	0.0478298	0.0180037	0.230604	0.0987234	0.226663	0.164655	0.159604	0.0987931	0.140261	0.328723	0.30713	0.275167	0.190401	0.39559
YDL063C	SYO1	1364	0.125289	0.183877	0.200844	0.132713	0.095967	0.168892	0.290275	0.183398	0.0208441	0.00859365	0.139522	0.130694	0.118401	0.545842	0.969161	0.57044	0.665031	0.559723	0.839068
YBR036C	CSG2	1365	0.152099	0.130845	0.165174	0.100543	0.0955739	0.124952	0.0511887	0.0214907	0.141508	0.190961	0.0633856	0.209702	0.245153	0.324883	0.282013	0.25924	0.156559	0.301136	0.326002
YMR044W	IOC4	1366	0.193939	0.0826109	0.13414	0.221362	0.13332	0.0822686	0.102342	0.254844	0.0912486	0.0845043	0.197913	0.166132	0.237373	0.251714	0.0902037	0.211969	0.0589654	0.25514	0.287689
YDR500C	RPL37B	1367	0.207729	0.139091	0.112119	0.14087	0.0347644	0.015399	0.00316023	0.0493684	0.0870509	0.0937258	0.0588842	0.104143	0.176761	0.494134	0.243824	0.318514	0.526219	0.414875	0.62246
YOR354C	MSC6	1368	0.155808	0.0362794	0.088597	0.168651	0.0504256	0.050968	0.0960136	0.13533	0.0981337	0.254276	0.122414	0.140024	0.107094	0.172015	0.340548	0.29706	0.123095	0.272706	0.424299
YKL004W	AUR1	1369	0.0331349	0.0997537	0.115666	0.211825	0.0370688	0.134799	0.118152	0.19129	0.128459	0.278897	0.0743557	0.185387	0.124542	0.260323	0.538663	0.277779	0.389569	0.470998	0.606949
YPL011C	TAF3	1370	0.234602	0.0722798	0.134902	0.197997	0.084627	0.0643332	0.0679226	0.0364622	0.147874	0.211959	0.197329	0.081817	0.174996	0.331087	0.461125	0.35504	0.415261	0.382516	0.5165
YJL010C	NOP9	1371	0.108716	0.0927679	0.213531	0.185458	0.0734738	0.136075	0.0923579	0.175224	0.180517	0.0423699	0.0898233	0.154911	0.227058	0.381909	0.575887	0.459981	0.443628	0.38166	0.718543
YDL212W	SHR3	1372	0.193855	0.230942	0.0530946	0.171663	0.13262	0.0992734	0.171291	0.139555	0.140849	0.132493	0.0843761	0.0950891	0.295405	0.462162	0.47283	0.651156	0.739168	0.536196	0.704358
YNL135C	FPR1	1373	0.165989	0.209535	0.0895012	0.0501239	0.0482293	0.123802	0.0692085	0.200106	0.185693	0.175722	0.132017	0.0966105	0.128665	0.0164832	0.192194	0.154928	0.115985	0.329783	0.0490718
YNL130C	CPT1	1374	0.142031	0.161468	0.0870623	0.173158	0.235447	0.0544689	0.206125	0.463052	0.172199	0.147212	0.11529	0.110332	0.251388	0.107811	0.283812	0.188522	0.312354	0.275977	0.25504
YOL021C	DIS3	1375	0.157102	0.127104	0.174071	0.151635	0.0800355	0.0871697	0.0963473	0.13803	0.14826	0.229774	0.182089	0.150272	0.106689	0.207478	0.332674	0.310059	0.292634	0.261042	0.52379
YGL108C	YGL108C	1376	0.347278	0.242613	0.339983	0.291788	0.193229	0.139752	0.16766	0.399624	0.0750997	0.158208	0.120992	0.220155	0.248687	0.0392278	0.0140368	0.377309	0.0999808	0.456949	0.135104
YDR169C	STB3	1377	0.211726	0.0541227	0.131039	0.176755	0.063638	0.08784	0.0369933	0.11243	0.144298	0.241677	0.091776	0.257731	0.126774	0.119741	0.0212443	0.10709	0.0992479	0.0800984	0.352472
YNL313C	EMW1	1378	0.11622	0.131711	0.121303	0.182433	0.0828595	0.0678539	0.184719	0.241977	0.0425791	0.142829	0.187899	0.196704	0.0883747	0.367	0.401439	0.241906	0.423032	0.3262	0.655837
YCR034W	ELO2	1379	0.128204	0.108453	0.110513	0.125406	0.0301893	0.0972279	0.0202963	0.155354	0.195604	0.262075	0.0566728	0.188041	0.186516	0.284131	0.571478	0.49143	0.493676	0.534853	0.587791
YML001W	YPT7	1380	0.172101	0.187343	0.130887	0.20264	0.0886008	0.0652447	0.0238599	0.210774	0.0906697	0.0947075	0.0216355	0.179334	0.256275	0.384246	0.398974	0.409119	0.218636	0.552837	0.581695
YDL171C	GLT1	1381	0.114745	0.0225872	0.214222	0.17401	0.0659087	0.0591301	0.0418691	0.255825	0.0390589	0.0561016	0.177567	0.101795	0.0331934	0.300604	0.251909	0.416879	0.364192	0.357455	0.580705
YLR003C	CMS1	1382	0.24174	0.13254	0.296635	0.169733	0.064582	0.12548	0.291452	0.167929	0.295585	0.0526073	0.139073	0.055926	0.152336	0.391386	0.672716	0.531414	0.623133	0.515897	0.749613
YER063W	THO1	1383	0.154414	0.0669267	0.178585	0.163719	0.0862867	0.100436	0.0973878	0.0471907	0.0789217	0.231431	0.0258946	0.135327	0.133956	0.282952	0.33194	0.262028	0.0116439	0.219523	0.477259
YKR063C	LAS1	1384	0.17248	0.141198	0.117138	0.181156	0.0624174	0.0307655	0.11059	0.200757	0.0153065	0.0324782	0.123078	0.082152	0.208782	0.374197	0.367497	0.370694	0.638865	0.273892	0.658297
YDL072C	YET3	1385	0.0543424	0.0757672	0.0424756	0.152799	0.14888	0.0624096	0.0168251	0.0804533	0.0378343	0.125711	0.0434523	0.139667	0.180568	0.113696	0.253377	0.0914085	0.382761	0.362308	0.234519
YKL176C	LST4	1386	0.0965446	0.0195938	0.0964684	0.167631	0.0545891	0.00822474	0.00107118	0.186192	0.115335	0.156792	0.127933	0.11336	0.0920233	0.166803	0.319654	0.324952	0.356119	0.262216	0.432882
YIR033W	MGA2	1387	0.146235	0.0654724	0.217193	0.21193	0.0474238	0.135168	0.120984	0.166943	0.029519	0.108968	0.179965	0.132225	0.161823	0.188722	0.424916	0.192239	0.131852	0.231682	0.4358
YKL185W	ASH1	1388	0.166544	0.0877234	0.146376	0.231889	0.0630077	0.0545561	0.0391184	0.394258	0.162433	0.3051	0.160501	0.181831	0.225399	0.107846	0.24523	0.0269285	0.0485786	0.130515	0.246522
YKL044W	YKL044W	1389	0.0418268	0.35282	0.145504	0.142774	0.221881	0.144612	0.17164	0.156171	0.43439	0.449761	0.0711831	0.362845	0.256934	0.277795	0.188293	0.234456	0.427997	0.120961	0.122692
YDR005C	MAF1	1390	0.173988	0.0812423	0.0909047	0.170274	0.0622486	0.0393966	0.0725868	0.181519	0.14824	0.205977	0.172252	0.172075	0.245634	0.255891	0.274582	0.35531	0.0078744	0.338002	0.327661
YNL191W	DUG3	1391	0.14979	0.264069	0.498981	0.43512	0.0953684	0.0684129	0.350001	0.426819	0.069765	0.129627	0.0759987	0.160316	0.145938	0.231433	0.137443	0.162763	0.152173	0.445669	0.399199
YNR019W	ARE2	1392	0.199641	0.0799783	0.0901229	0.180984	0.0553323	0.140714	0.0389101	0.147871	0.142286	0.149798	0.169037	0.326457	0.259807	0.024016	0.132144	0.135228	0.190527	0.225003	0.293971
YBL064C	PRX1	1393	0.0688317	0.0314093	0.170024	0.276383	0.140337	0.184584	0.0471953	0.135568	0.260732	0.288626	0.0416115	0.151688	0.149494	0.090735	0.0486198	0.0263807	0.0216086	0.0139834	0.0349134
YNL041C	COG6	1394	0.143558	0.0588169	0.11998	0.238101	0.0289386	0.0713722	0.0905761	0.156823	0.0641381	0.106918	0.200028	0.142877	0.152215	0.198229	0.287419	0.219475	0.194264	0.179727	0.369195
YKL143W	LTV1	1395	0.120638	0.168842	0.253165	0.123303	0.186875	0.10068	0.259999	0.25454	0.119369	0.0813069	0.137012	0.0832083	0.11899	0.49492	0.644097	0.360721	0.573205	0.46858	0.56564
YLR071C	RGR1	1396	0.124373	0.0663243	0.160609	0.230604	0.0238632	0.0842866	0.110223	0.248779	0.133451	0.114178	0.174731	0.171749	0.0853895	0.267677	0.425406	0.262124	0.221999	0.253477	0.44094
YLR026C	SED5	1397	0.184528	0.120377	0.309147	0.259946	0.185605	0.0932866	0.236388	0.435489	0.0407356	0.0757201	0.183812	0.0865378	0.153704	0.321601	0.249742	0.248739	0.0843166	0.20891	0.416241
YNL272C	SEC2	1398	0.137161	0.0645157	0.118346	0.203782	0.0742895	0.0428104	0.0280472	0.281197	0.0204332	0.0852644	0.107001	0.259263	0.183713	0.143292	0.269739	0.169297	0.115569	0.196791	0.374668
YOR227W	HER1	1399	0.117043	0.0277134	0.0738035	0.18154	0.0403702	0.0362628	0.0382618	0.281013	0.122762	0.263945	0.0595144	0.164514	0.0679828	0.1159	0.0803702	0.122185	0.207181	0.0386645	0.225327
YOR285W	RDL1	1400	0.174616	0.214338	0.176512	0.285187	0.223945	0.215445	0.0892337	0.295439	0.218214	0.168996	0.0680078	0.0807476	0.356078	0.678635	0.276047	0.41321	0.623133	0.347273	0.678194
YKL087C	CYT2	1401	0.0994356	0.101663	0.12479	0.139959	0.145306	0.0577374	0.165165	0.0239109	0.179734	0.19198	0.0862857	0.0224499	0.166017	0.173075	0.0018534	0.0781364	0.0515145	0.115585	0.319068
YBR122C	MRPL36	1402	0.19987	0.122404	0.0854158	0.121138	0.0800893	0.0646071	0.140927	0.302705	0.219047	0.0307829	0.0430912	0.0720691	0.247251	0.403136	0.311796	0.2135	0.276382	0.523182	0.616039
YJR042W	NUP85	1403	0.125338	0.0652311	0.0940514	0.177118	0.0439837	0.0488099	0.0763527	0.163017	0.0887255	0.120565	0.119903	0.150546	0.163546	0.237078	0.425285	0.399124	0.297163	0.277741	0.545817
YCR003W	MRPL32	1404	0.150587	0.190889	0.144691	0.217104	0.109558	0.0516748	0.0976167	0.321513	0.0592422	0.0887078	0.065343	0.148738	0.214983	0.431438	0.465108	0.284682	0.342388	0.351219	0.467125
YLR028C	ADE16	1405	0.105142	0.0652349	0.139961	0.188565	0.0770771	0.0656494	0.0600568	0.20693	0.159091	0.097127	0.144015	0.149341	0.144118	0.172884	0.152882	0.274118	0.0697387	0.186501	0.436107
YJL104W	PAM16	1406	0.330739	0.336687	0.12041	0.226503	0.0952239	0.169768	0.0550818	0.000315562	0.242492	0.197155	0.14581	0.127674	0.149408	0.107378	0.477314	0.651156	0.502106	0.271156	0.668515
YDL226C	GCS1	1407	0.187042	0.133601	0.220769	0.161876	0.057128	0.0303989	0.0423663	0.0209171	0.135272	0.13299	0.111918	0.202129	0.144597	0.136998	0.216616	0.022519	0.0567102	0.25771	0.188095
YOR372C	NDD1	1408	0.0531619	0.0235644	0.142546	0.140942	0.106426	0.0397998	0.00644294	0.142406	0.107387	0.291751	0.0997996	0.0919033	0.160579	0.191111	0.191316	0.0168924	0.00612292	0.144123	0.314767
YOL020W	TAT2	1409	0.108456	0.204323	0.0470538	0.0224857	0.0194419	0.13167	0.0468194	0.255275	0.139414	0.123486	0.113651	0.159282	0.0203932	0.253004	0.418578	0.220808	0.182441	0.274699	0.406264
YDR210W	YDR210W	1410	0.295334	0.128522	0.0965139	0.297558	0.240747	0.100908	0.240654	0.114352	0.142523	0.185681	0.305733	0.194709	0.58237	0.27215	0.579546	0.698505	0.623133	0.68982	0.866992
YGR183C	QCR9	1411	0.188329	0.243025	0.150773	0.244199	0.13671	0.0889174	0.205735	0.226665	0.221494	0.294448	0.033004	0.166841	0.411438	0.328842	0.195098	0.443927	0.397878	0.407057	0.455048
YDR262W	YDR262W	1412	0.176412	0.103198	0.100375	0.189674	0.0560563	0.0725023	0.040415	0.263721	0.0774481	0.139381	0.120815	0.200646	0.251104	0.244615	0.434097	0.250676	0.443467	0.253169	0.302559
YML086C	ALO1	1413	0.107641	0.0827025	0.10987	0.198623	0.0814187	0.041989	0.0226884	0.180362	0.167807	0.115019	0.16351	0.117007	0.129748	0.290925	0.308673	0.253429	0.280753	0.316177	0.371521
YIL041W	GVP36	1414	0.136737	0.0586694	0.18823	0.193782	0.104346	0.0594565	0.0209895	0.151159	0.106443	0.140612	0.0574066	0.138427	0.209093	0.139073	0.227559	0.154882	0.103117	0.249906	0.388251
YGR245C	SDA1	1415	0.178218	0.15072	0.244275	0.180232	0.223144	0.158142	0.133294	0.118898	0.0841325	0.0092118	0.0852926	0.127953	0.134097	0.415078	0.858012	0.401607	0.59917	0.4142	0.702717
YNR038W	DBP6	1416	0.143156	0.109615	0.215217	0.224541	0.055029	0.0490536	0.306168	0.0353543	0.152398	0.153702	0.217183	0.110626	0.129141	0.253844	0.533632	0.277479	0.298486	0.357591	0.698325
YER022W	SRB4	1417	0.179301	0.108439	0.188887	0.243276	0.0828817	0.025317	0.0892851	0.117481	0.184472	0.240129	0.15411	0.18433	0.103417	0.262013	0.310837	0.426127	0.229161	0.214851	0.431673
YDL035C	GPR1	1418	0.110362	0.0816817	0.162134	0.21348	0.100089	0.00227416	0.0619508	0.231703	0.0736386	0.0784527	0.183845	0.197533	0.0542454	0.198527	0.303914	0.216582	0.269868	0.154124	0.501089
YJR125C	ENT3	1419	0.108738	0.096385	0.0564875	0.159862	0.0380484	0.0314601	0.0632065	0.26907	0.213275	0.133534	0.110928	0.0637206	0.196863	0.0399106	0.0118333	0.00462339	0.138264	0.103377	0.279545
YCL030C	HIS4	1420	0.0695096	0.144552	0.141384	0.200522	0.0909808	0.15937	0.0949497	0.0100618	0.182884	0.0538439	0.109775	0.161472	0.0163887	0.202991	0.309336	0.42172	0.385484	0.427563	0.459545
YLL021W	SPA2	1421	0.196354	0.0840837	0.1785	0.180708	0.0907837	0.0444066	0.15839	0.160403	0.153433	0.236564	0.139566	0.152382	0.133619	0.245404	0.203281	0.198822	0.0739848	0.0949028	0.319255
YOR159C	SME1	1422	0.217248	0.0671321	0.147964	0.0892949	0.163126	0.0551605	0.212543	0.18004	0.084699	0.135798	0.136902	0.111628	0.296817	0.385976	0.389453	0.54916	0.532392	0.289302	0.507574
YPL059W	GRX5	1423	0.188896	0.153281	0.0884997	0.235407	0.133438	0.163491	0.00385002	0.200952	0.152527	0.0446622	0.157081	0.071557	0.153451	0.388956	0.215164	0.112072	0.287222	0.237978	0.431803
YLR052W	IES3	1424	0.238734	0.0800669	0.3282	0.217778	0.181088	0.0083881	0.297444	0.107993	0.174141	0.158043	0.149187	0.134549	0.275055	0.146398	0.246983	0.088076	0.127917	0.383815	0.285284
YGL106W	MLC1	1425	0.132078	0.169453	0.102265	0.123862	0.0475199	0.0104781	0.0594165	0.126038	0.0849737	0.218675	0.077524	0.0477679	0.160828	0.150867	0.0230202	0.105989	0.429733	0.28373	0.316539
YDR527W	RBA50	1426	0.162956	0.0954621	0.261677	0.188819	0.161443	0.0350895	0.28344	0.178395	0.189073	0.0323938	0.128345	0.0707705	0.0912511	0.310665	0.39798	0.34994	0.317024	0.362466	0.534014
YIL112W	HOS4	1427	0.158783	0.0546666	0.189249	0.221883	0.123661	0.0464189	0.127813	0.136863	0.157948	0.195552	0.183432	0.146405	0.149766	0.197203	0.258001	0.286938	0.262546	0.190675	0.395014
YOR375C	GDH1	1428	0.154977	0.285742	0.514236	0.695927	0.248345	0.0390999	0.333689	0.474372	0.0309905	0.0191935	0.105028	0.163705	0.169103	0.197065	0.0168782	0.42793	0.274034	0.280894	0.419124
YOR165W	SEY1	1429	0.16422	0.0779844	0.137641	0.128995	0.0235708	0.100034	0.0666774	0.265719	0.0397918	0.141288	0.143305	0.280627	0.0958613	0.234957	0.410938	0.371449	0.381099	0.328144	0.512475
YFL013C	IES1	1430	0.184879	0.0968725	0.237888	0.187335	0.0942458	0.0231535	0.18925	0.151442	0.160425	0.138487	0.136821	0.071608	0.165436	0.16769	0.285885	0.213051	0.217474	0.101929	0.323145
YKL033W-A	YKL033W-A	1431	0.141287	0.0798271	0.136399	0.097214	0.0417974	0.0687512	0.165656	0.0887027	0.236003	0.132711	0.0838996	0.10427	0.234224	0.206653	0.124541	0.475563	0.311701	0.433631	0.541985
YNL221C	POP1	1432	0.161632	0.209239	0.152598	0.148884	0.127442	0.0837346	0.171409	0.181302	0.0752096	0.011123	0.112135	0.098366	0.034741	0.207646	0.354747	0.274483	0.336252	0.337072	0.530126
YEL003W	GIM4	1433	0.17696	0.1829	0.359126	0.300616	0.147853	0.203327	0.182797	0.293767	0.263917	0.0489748	0.0662396	0.015766	0.0369705	0.397331	0.620264	0.537343	0.593577	0.40122	0.538185
YOR142W	LSC1	1434	0.19444	0.102774	0.220446	0.196271	0.0634867	0.0876045	0.146252	0.185696	0.0998277	0.285772	0.166209	0.157014	0.0788519	0.0800776	0.140182	0.139717	0.0943768	0.00972747	0.238487
YBR126C	TPS1	1435	0.116017	0.00775216	0.199456	0.111737	0.159682	0.217241	0.213897	0.141125	0.206585	0.0708329	0.020316	0.230456	0.298482	0.158747	0.589145	0.0958669	0.609295	0.282784	0.389281
YNR031C	SSK2	1436	0.133719	0.051073	0.119104	0.190862	0.0297709	0.015686	0.00588398	0.230385	0.102809	0.141617	0.14476	0.202586	0.126472	0.18466	0.290908	0.322665	0.284484	0.241632	0.419171
YMR001C-A	YMR001C-A	1437	0.0400221	0.161135	0.117541	0.21644	0.159149	0.128921	0.120492	0.495021	0.239133	0.16123	0.270079	0.0685336	0.472792	0.362489	0.614904	0.421586	0.330368	0.504797	0.517896
YMR291W	TDA1	1438	0.130662	0.0802728	0.0406713	0.149322	0.129222	0.154734	0.131094	0.284144	0.0711922	0.252645	0.115803	0.169179	0.166251	0.0460033	0.0160562	0.00646385	0.0903647	0.0510183	0.0724504
YMR093W	UTP15	1439	0.106549	0.0653099	0.160888	0.165473	0.0718278	0.039525	0.218833	0.201626	0.183359	0.118527	0.0663901	0.105986	0.0540207	0.327641	0.425535	0.304271	0.445701	0.323463	0.51421
YJL192C	SOP4	1440	0.262525	0.0554215	0.264739	0.232241	0.0605162	0.0128225	0.018915	0.0912897	0.189323	0.177505	0.186474	0.0139484	0.231991	0.305248	0.445605	0.300385	0.0805369	0.373261	0.633031
YMR212C	EFR3	1441	0.123356	0.0546395	0.123654	0.165739	0.0344922	0.0972348	0.0127727	0.0743087	0.0683567	0.0657268	0.145433	0.133826	0.169065	0.300568	0.428264	0.473585	0.447442	0.329856	0.681401
YPR097W	YPR097W	1442	0.154309	0.0981669	0.155851	0.186543	0.0455216	0.0473163	0.0745589	0.286671	0.101553	0.157036	0.195016	0.151236	0.141161	0.242861	0.368141	0.326294	0.336075	0.268257	0.535748
YNL268W	LYP1	1443	0.090852	0.149341	0.141899	0.207649	0.0907994	0.0582736	0.0697732	0.211175	0.127889	0.0700275	0.125859	0.235608	0.0421654	0.205332	0.148984	0.263607	0.173193	0.248072	0.322716
YLR336C	SGD1	1444	0.194216	0.158929	0.168462	0.0911147	0.0849022	0.127328	0.0849116	0.0519042	0.160132	0.0764818	0.149816	0.138377	0.180732	0.363445	0.432004	0.439721	0.54691	0.415798	0.684531
YGL233W	SEC15	1445	0.155103	0.0829602	0.151109	0.14009	0.0466921	0.00900671	0.0652434	0.300387	0.0383939	0.189491	0.221894	0.171568	0.167564	0.15898	0.394157	0.332762	0.238817	0.190589	0.40338
YGR207C	CIR1	1446	0.231379	0.0579084	0.13725	0.26953	0.100315	0.0311952	0.094	0.15276	0.0744965	0.16322	0.113941	0.0742661	0.229893	0.233838	0.293224	0.132375	0.487097	0.339652	0.479698
YNL010W	YNL010W	1447	0.130337	0.164122	0.0713356	0.222654	0.119635	0.160257	0.0216276	0.0197772	0.0969796	0.190932	0.0820806	0.0175576	0.318982	0.492728	0.373654	0.575161	0.449389	0.541206	0.698344
YGR184C	UBR1	1448	0.154408	0.0732601	0.131402	0.24049	0.02575	0.0680452	0.0392562	0.188414	0.138196	0.233625	0.148663	0.168797	0.137279	0.170009	0.278354	0.293676	0.217346	0.183199	0.488376
YPL195W	APL5	1449	0.174746	0.0453643	0.108591	0.150166	0.0498346	0.0844159	0.000561938	0.174544	0.112954	0.224177	0.13348	0.211153	0.104522	0.128015	0.216396	0.291939	0.206006	0.190763	0.350693
YDR378C	LSM6	1450	0.1104	0.123253	0.0343328	0.151803	0.0678449	0.0815126	0.0320336	0.448645	0.277233	0.170158	0.0521213	0.154152	0.458968	0.48615	0.487903	0.185702	0.683836	0.700733	0.607648
YBR253W	SRB6	1451	0.107419	0.0793995	0.256423	0.201606	0.0377472	0.0327841	0.0929742	0.196606	0.111514	0.0518037	0.132397	0.234794	0.249597	0.386401	0.215761	0.152756	0.315306	0.315176	0.364995
YIL056W	VHR1	1452	0.0423508	0.109163	0.178302	0.0228768	0.064493	0.10557	0.061265	0.0193239	0.0835463	0.0174021	0.13767	0.132881	0.212988	0.0914464	0.162476	0.0737145	0.0567168	0.0261563	0.0403902
YOR085W	OST3	1453	0.153645	0.0740521	0.116923	0.192911	0.0584592	0.0993143	0.0128244	0.132446	0.105772	0.275844	0.177888	0.166789	0.219603	0.192778	0.0463852	0.0287271	0.0195555	0.181921	0.23569
YHR026W	VMA16	1454	0.0799695	0.182568	0.0362618	0.238591	0.0938461	0.103029	0.0101704	0.0969899	0.216387	0.305867	0.0179322	0.0933927	0.306737	0.275325	0.327584	0.532897	0.351076	0.582744	0.662075
YDL112W	TRM3	1455	0.156317	0.0606397	0.131343	0.177796	0.00738928	0.0436424	0.155288	0.0945416	0.0544729	0.0849094	0.125933	0.112665	0.0558647	0.297264	0.655217	0.434929	0.482227	0.36521	0.638604
YLR357W	RSC2	1456	0.152743	0.0660615	0.106869	0.172875	0.131798	0.00669142	0.141837	0.205525	0.177024	0.108315	0.172657	0.175147	0.10893	0.130074	0.271026	0.293972	0.099036	0.148692	0.322309
YDL198C	GGC1	1457	0.102917	0.0603518	0.184194	0.0985257	0.0442981	0.17576	0.0437869	0.0722013	0.10768	0.0721742	0.0789901	0.0270887	0.0908185	0.0161128	0.330704	0.0406066	0.256721	0.155982	0.278084
YPR105C	COG4	1458	0.168705	0.0988994	0.235598	0.239089	0.0121484	0.064197	0.0357097	0.262511	0.0607531	0.16657	0.17927	0.160982	0.143672	0.10217	0.23231	0.178139	0.0424362	0.182183	0.35833
YBR054W	YRO2	1459	0.287786	0.191668	0.28372	0.454128	0.143373	0.244754	0.316175	0.406945	0.0616878	0.275158	0.895343	0.320477	0.532169	0.332417	0.584913	0.293586	0.505423	0.363629	0.484663
YOR311C	DGK1	1460	0.0842107	0.0528754	0.126586	0.197591	0.088683	0.0504093	0.00584658	0.13495	0.166023	0.175722	0.154131	0.0781387	0.138284	0.324892	0.334939	0.211835	0.302951	0.200359	0.317413
YHR006W	STP2	1461	0.1226	0.0973163	0.0932704	0.153523	0.0989848	0.0582871	0.142624	0.13741	0.168451	0.0280462	0.143833	0.0596668	0.151452	0.163625	0.0158553	0.057957	0.0113371	0.0772241	0.252957
YKR100C	SKG1	1462	0.159763	0.0782266	0.143979	0.162873	0.0968502	0.0798831	0.0815853	0.215003	0.263932	0.0369745	0.0782494	0.0868776	0.148894	0.246811	0.183714	0.25391	0.363112	0.139551	0.403905
YGL013C	PDR1	1463	0.170338	0.0816498	0.147462	0.25958	0.0553778	0.0571331	0.125704	0.214131	0.105009	0.210037	0.194606	0.150848	0.140577	0.164389	0.3941	0.263752	0.350509	0.244817	0.518919
YPL053C	KTR6	1464	0.0811473	0.0389159	0.0825308	0.162824	0.00667255	0.085909	0.0390746	0.125237	0.0887047	0.00449651	0.0892626	0.0855413	0.267946	0.180998	0.329842	0.29231	0.393923	0.323531	0.569097
YJR134C	SGM1	1465	0.203631	0.0633456	0.270233	0.277677	0.0531941	0.126814	0.0971629	0.188815	0.177433	0.120766	0.108734	0.0766739	0.246197	0.175416	0.207009	0.323954	0.0697387	0.24941	0.279488
YOR241W	MET7	1466	0.18372	0.0933055	0.122757	0.230308	0.0244704	0.027407	0.04457	0.371886	0.0795583	0.101296	0.156448	0.133536	0.19561	0.203127	0.392262	0.311753	0.300667	0.311528	0.485912
YLL034C	RIX7	1467	0.167743	0.153161	0.225499	0.144967	0.09861	0.0976243	0.195764	0.0678179	0.155864	0.111786	0.145322	0.179224	0.0973519	0.377819	0.6752	0.443234	0.631622	0.408484	0.667021
YGL038C	OCH1	1468	0.176378	0.0489234	0.186883	0.180031	0.127455	0.0839517	0.00594611	0.188489	0.0189505	0.17902	0.202128	0.166986	0.228096	0.0343029	0.141355	0.00219629	0.268902	0.0679792	0.0858486
YKL204W	EAP1	1469	0.174075	0.114823	0.138945	0.172203	0.0805056	0.0207992	0.128783	0.253791	0.181193	0.180709	0.192282	0.170729	0.077821	0.241784	0.228971	0.0868084	0.0368923	0.212291	0.222865
YDR146C	SWI5	1470	0.123371	0.0433024	0.180087	0.318429	0.0753256	0.0802336	0.0488839	0.276017	0.183809	0.258432	0.156436	0.0856486	0.375471	0.317316	0.453642	0.302347	0.067685	0.168321	0.546862
YKR031C	SPO14	1471	0.174477	0.0675294	0.132837	0.21279	0.0351302	0.0357846	0.00754825	0.202481	0.0778315	0.182775	0.190995	0.120553	0.131962	0.207922	0.233136	0.315251	0.232297	0.170519	0.326412
YPR125W	YLH47	1472	0.199294	0.0506021	0.147314	0.137285	0.106319	0.0480767	0.105605	0.331258	0.0349455	0.0899434	0.19066	0.103835	0.180019	0.3845	0.50963	0.32418	0.38236	0.349156	0.518638
YKR061W	KTR2	1473	0.0594057	0.0753584	0.0852042	0.218741	0.0631604	0.134444	0.0510939	0.263472	0.0547986	0.0684493	0.112375	0.0360261	0.0522014	0.321988	0.281475	0.482526	0.436043	0.425503	0.398057
YMR255W	GFD1	1474	0.244098	0.0630099	0.303268	0.342009	0.191274	0.0328419	0.166789	0.0612842	0.156828	0.203248	0.115141	0.046352	0.266028	0.236444	0.033752	0.318242	0.20062	0.193823	0.0301285
YNL236W	SIN4	1475	0.139695	0.0913592	0.144236	0.213438	0.0464273	0.0683106	0.0200307	0.180999	0.150527	0.161604	0.0887329	0.102448	0.0922625	0.105365	0.305099	0.246388	0.27513	0.137841	0.408144
YOR191W	ULS1	1476	0.181629	0.0626576	0.114809	0.212147	0.0377248	0.0768492	0.0428567	0.241774	0.0702548	0.108234	0.145913	0.10098	0.169393	0.171868	0.329226	0.246232	0.305537	0.157554	0.439561
YIL030C	SSM4	1477	0.118016	0.0573335	0.0468309	0.164082	0.0458925	0.00441128	0.053857	0.236778	0.0828769	0.132677	0.118333	0.224402	0.0285728	0.223637	0.462719	0.335458	0.396054	0.299669	0.560196
YBR179C	FZO1	1478	0.20727	0.0822646	0.148874	0.259001	0.0724909	0.0217034	0.00675073	0.188668	0.0980898	0.204539	0.140361	0.133224	0.0780243	0.0949071	0.275655	0.201726	0.319985	0.13974	0.364995
YDR034C	LYS14	1479	0.104075	0.13051	0.0526831	0.17131	0.0267596	0.0604005	0.0690934	0.259526	0.072404	0.096972	0.0651532	0.109959	0.135699	0.074197	0.250285	0.215277	0.368043	0.140646	0.401468
YDR219C	MFB1	1480	0.187966	0.105109	0.153712	0.179414	0.0594475	0.0326954	0.0867734	0.231672	0.125821	0.181794	0.129641	0.118463	0.130553	0.0768027	0.00229386	0.156953	0.214356	0.186836	0.320612
YOR103C	OST2	1481	0.192725	0.227015	0.0350103	0.215629	0.124032	0.11746	0.0668804	0.159822	0.00499795	0.133822	0.0595831	0.116024	0.285691	0.124145	0.215761	0.657063	0.661843	0.618307	0.541459
YNL006W	LST8	1482	0.127553	0.131465	0.166347	0.258018	0.0696833	0.170896	0.00927397	0.0355467	0.172035	0.0421386	0.0702196	0.0700555	0.131476	0.232879	0.374383	0.416732	0.280416	0.381902	0.610698
YDR333C	RQC1	1483	0.181232	0.0653196	0.0741598	0.148808	0.0203993	0.0104388	0.0674263	0.113281	0.11291	0.161877	0.206376	0.142727	0.154292	0.242218	0.228725	0.27011	0.299498	0.16292	0.378567
YDR027C	VPS54	1484	0.142275	0.104035	0.0798549	0.157411	0.00801843	0.0332438	0.0284857	0.225503	0.0346589	0.127732	0.136082	0.15955	0.161085	0.147117	0.185387	0.262157	0.239189	0.100778	0.224171
YKR093W	PTR2	1485	0.154209	0.0504801	0.203683	0.274672	0.123825	0.110472	0.773785	0.630802	0.047667	0.220914	0.0155516	0.274038	0.383605	0.150582	0.312093	0.0725171	0.185342	0.234357	0.238549
YHR020W	YHR020W	1486	0.134373	0.104645	0.0724086	0.139685	0.0528613	0.0867643	0.0745172	0.102465	0.153731	0.0464423	0.0863912	0.0875188	0.0815396	0.183504	0.0955714	0.255005	0.0399948	0.220696	0.458041
YJL098W	SAP185	1487	0.0898423	0.118125	0.170208	0.181667	0.168165	0.112419	0.15254	0.204263	0.141629	0.113904	0.174302	0.163863	0.170826	0.359558	0.548584	0.378949	0.410946	0.353625	0.620237
YNL239W	LAP3	1488	0.0639795	0.0622877	0.110364	0.14837	0.0886271	0.0858166	0.195466	0.313947	0.163832	0.200646	0.149661	0.0447824	0.141494	0.208546	0.0265764	0.0502334	0.0452832	0.0970262	0.176815
YEL061C	CIN8	1489	0.186179	0.0794354	0.257443	0.248177	0.155253	0.0564465	0.141351	0.140854	0.17166	0.0947127	0.139449	0.125793	0.360585	0.125597	0.432339	0.276336	0.335738	0.298882	0.376774
YGL140C	YGL140C	1490	0.15822	0.074139	0.120808	0.1846	0.0659357	0.0264123	0.0101051	0.282916	0.0997027	0.211731	0.168619	0.179249	0.0702444	0.240858	0.302325	0.334202	0.360159	0.189827	0.444196
YPR070W	MED1	1491	0.161268	0.0949053	0.167962	0.174096	0.0400661	0.0306201	0.208685	0.291943	0.0290892	0.186458	0.166989	0.149468	0.136322	0.31986	0.431177	0.395256	0.4149	0.256106	0.569059
YBL007C	SLA1	1492	0.167825	0.0832364	0.135617	0.143535	0.0265951	0.0621736	0.0190982	0.176184	0.13553	0.151648	0.132901	0.0880987	0.103273	0.109455	0.07369	0.0715776	0.0706273	0.0907177	0.283452
YNR068C	YNR068C	1493	0.307825	0.157576	0.241962	0.257681	0.0834741	0.0409464	0.27609	0.0912897	0.230631	0.0873212	0.217488	0.245479	0.307804	0.0476024	0.432676	0.19008	0.151641	0.0201933	0.326627
YBR142W	MAK5	1494	0.176858	0.119961	0.277463	0.190905	0.119082	0.136452	0.272984	0.0388348	0.168636	0.0731492	0.260597	0.164449	0.126365	0.43605	0.738514	0.51834	0.670036	0.456551	0.715227
YLR113W	HOG1	1495	0.16468	0.150457	0.144961	0.205248	0.0750529	0.0653224	0.031578	0.326363	0.107723	0.0499163	0.137717	0.157459	0.0476669	0.107512	0.164789	0.0841995	0.142864	0.0788234	0.260099
YER129W	SAK1	1496	0.116465	0.0703546	0.0559333	0.140933	0.0617913	0.0313844	0.15748	0.160621	0.0368652	0.129425	0.100739	0.128143	0.146405	0.183183	0.298387	0.24936	0.320709	0.186535	0.375331
YNL252C	MRPL17	1497	0.220061	0.107225	0.222133	0.24577	0.0777335	0.0515021	0.0282119	0.072864	0.174879	0.159632	0.277273	0.109423	0.0881043	0.28686	0.128599	0.184968	0.16064	0.320401	0.470951
YER127W	LCP5	1498	0.153717	0.230263	0.299889	0.158342	0.173584	0.0660438	0.327678	0.196606	0.12357	0.0663353	0.0479091	0.0836743	0.111871	0.48987	0.576438	0.387047	0.515205	0.449396	0.548124
YDR087C	RRP1	1499	0.149569	0.166816	0.19898	0.232224	0.106406	0.118837	0.128783	0.048247	0.0857539	0.00227581	0.0700423	0.0894936	0.17136	0.319255	0.66864	0.504598	0.658925	0.562982	0.803815
YMR140W	SIP5	1500	0.138191	0.0850469	0.138455	0.111265	0.059914	0.0485018	0.0723693	0.238134	0.0881663	0.18913	0.077486	0.146845	0.0693092	0.0218236	0.151004	0.139568	0.105508	0.00293055	0.0608426
YDR515W	SLF1	1501	0.226833	0.108835	0.278655	0.323302	0.116337	0.0781315	0.205067	0.224033	0.143748	0.165731	0.0424121	0.16879	0.222925	0.195381	0.441162	0.324911	0.342388	0.244463	0.535989
YGR158C	MTR3	1502	0.127233	0.0860294	0.180715	0.232874	0.0486265	0.15637	0.366936	0.317999	0.16629	0.0129309	0.151862	0.0380137	0.122123	0.287136	0.623547	0.419603	0.379463	0.367042	0.699366
YOR376W-A	YOR376W-A	1503	0.0474421	0.162676	0.169835	0.0897314	0.150912	0.12404	0.0626765	0.469801	0.0439041	0.262075	0.286581	0.2297	0.0780563	0.0424293	0.0385541	0.199099	0.359849	0.0614466	0.601073
YMR256C	COX7	1504	0.201704	0.186809	0.131598	0.317877	0.0529753	0.0302246	0.295235	0.0374953	0.176304	0.129677	0.0647012	0.238717	0.304073	0.28068	0.336018	0.441769	0.229161	0.760506	0.364995
YER092W	IES5	1505	0.192222	0.158445	0.234606	0.200082	0.0952375	0.0971178	0.217155	0.00157257	0.254827	0.0471191	0.0410834	0.142931	0.344457	0.339996	0.15407	0.311947	0.137939	0.566729	0.507574
YHR201C	PPX1	1506	0.10673	0.0560892	0.16036	0.201269	0.0510422	0.0524145	0.0949461	0.149531	0.148416	0.142135	0.148536	0.0911776	0.161493	0.28799	0.250728	0.347148	0.420284	0.394736	0.374975
YJL176C	SWI3	1507	0.128284	0.0702246	0.209152	0.194138	0.054904	0.0470238	0.0867921	0.152717	0.0892307	0.152136	0.121136	0.11919	0.181961	0.166043	0.144142	0.143226	0.188842	0.131006	0.316539
YFL036W	RPO41	1508	0.137084	0.094508	0.0664343	0.19405	0.017292	0.00746987	0.0293755	0.130124	0.0800334	0.1974	0.171269	0.122365	0.139007	0.191169	0.269324	0.293291	0.296719	0.218594	0.420773
YDR468C	TLG1	1509	0.0517285	0.173467	0.214593	0.132942	0.0742846	0.0934194	0.0453544	0.0362038	0.056468	0.0447395	0.0388314	0.017882	0.131632	0.407577	0.451785	0.362581	0.29505	0.212291	0.697292
YDL003W	MCD1	1510	0.188228	0.157041	0.116272	0.119298	0.17092	0.0116363	0.207622	0.267245	0.131547	0.0873212	0.202231	0.187026	0.424476	0.266947	0.193752	0.20665	0.0861718	0.210591	0.226314
YLR019W	PSR2	1511	0.184955	0.133405	0.0300669	0.172674	0.090232	0.0735983	0.017974	0.309527	0.0703236	0.206877	0.121611	0.111602	0.11038	0.0130175	0.105209	0.0541593	0.0339782	0.00139851	0.101856
YDR407C	TRS120	1512	0.131498	0.0298493	0.110584	0.212131	0.0123866	0.0348406	0.0525679	0.151727	0.0505575	0.19248	0.114186	0.169253	0.202482	0.149628	0.21032	0.236457	0.189758	0.143845	0.370673
YFL048C	EMP47	1513	0.184412	0.124311	0.0954875	0.195873	0.0226465	0.0436756	0.0250812	0.0287836	0.188947	0.0616775	0.100791	0.149807	0.192371	0.243792	0.393734	0.408427	0.348414	0.408233	0.451507
YLR181C	VTA1	1514	0.14636	0.152185	0.245783	0.262945	0.0853699	0.080356	0.139909	0.390874	0.111613	0.204462	0.127933	0.230463	0.155331	0.281009	0.0887416	0.325467	0.188798	0.316321	0.337151
YOR157C	PUP1	1515	0.196236	0.222806	0.219565	0.224267	0.0376332	0.137989	0.184611	0.0412221	0.223389	0.0266266	0.165746	0.0489832	0.390636	0.3587	0.13854	0.193094	0.421645	0.217007	0.471887
YGR200C	ELP2	1516	0.137324	0.105035	0.0793249	0.15218	0.0188915	0.0647717	0.142864	0.0324237	0.0740135	0.117892	0.148872	0.120505	0.153522	0.333117	0.568608	0.37218	0.49307	0.370613	0.71696
YOR021C	SFM1	1517	0.127438	0.250109	0.1015	0.13066	0.0617265	0.0732024	0.0281035	0.0521467	0.161092	0.221985	0.0915105	0.0877142	0.242483	0.309668	0.481007	0.384843	0.506358	0.358914	0.598291
YDR328C	SKP1	1518	0.264846	0.184464	0.303098	0.323998	0.109286	0.00163526	0.138064	0.0988995	0.137553	0.0222643	0.309813	0.107948	0.158971	0.152582	0.143453	0.0109668	0.00143975	0.0560921	0.319068
YMR153W	NUP53	1519	0.11911	0.110965	0.154579	0.152137	0.0918447	0.0506886	0.0842855	0.113312	0.13145	0.110502	0.144447	0.115081	0.138498	0.253215	0.323669	0.235886	0.217474	0.232028	0.402863
YER082C	UTP7	1520	0.229524	0.0774897	0.285428	0.212687	0.179891	0.129488	0.366474	0.115807	0.160925	0.0607543	0.159226	0.0840798	0.14998	0.388122	0.498483	0.365442	0.531059	0.478762	0.505731
YJL196C	ELO1	1521	0.164829	0.10683	0.32635	0.240357	0.152081	0.0741523	0.248059	0.37888	0.0623835	0.126043	0.0852759	0.217553	0.153979	0.00916997	0.220723	0.249679	0.216625	0.281042	0.519098
YJL183W	MNN11	1522	0.00761121	0.144993	0.14601	0.201155	0.0261301	0.0648453	0.021434	0.233156	0.0763224	0.246135	0.125243	0.179871	0.169474	0.344435	0.385353	0.313538	0.363411	0.389695	0.514646
YDR081C	PDC2	1523	0.135681	0.107412	0.132507	0.169229	0.0541146	0.0255109	0.0561043	0.227675	0.0732738	0.0536066	0.153742	0.172947	0.1467	0.199021	0.371103	0.260726	0.333206	0.240269	0.371258
YER166W	DNF1	1524	0.134338	0.0234956	0.0984699	0.15514	0.0185122	0.0446282	0.0118944	0.215793	0.12142	0.183245	0.153599	0.190499	0.0900858	0.154441	0.226816	0.265045	0.141181	0.195606	0.413156
YBR140C	IRA1	1525	0.161029	0.0811801	0.123745	0.197207	0.0571626	0.0332528	0.0492894	0.139727	0.0991289	0.202618	0.177136	0.106239	0.198183	0.123275	0.307399	0.286801	0.241454	0.205214	0.458556
YJR091C	JSN1	1526	0.14899	0.0417472	0.0815001	0.243606	0.0576739	0.084223	0.075992	0.144567	0.142628	0.211611	0.125919	0.175874	0.133088	0.0316158	0.131447	0.0434978	0.0154634	0.0595024	0.308895
YLR084C	RAX2	1527	0.155683	0.0414128	0.0849254	0.147177	0.133745	0.0648555	0.100639	0.0707614	0.12368	0.0939156	0.131234	0.102156	0.148018	0.276532	0.328955	0.338185	0.328864	0.293115	0.509502
YJR092W	BUD4	1528	0.12491	0.0920038	0.128431	0.208259	0.0805886	0.0474412	0.0576107	0.200707	0.0674502	0.154951	0.145779	0.187938	0.231027	0.204129	0.276485	0.246153	0.195627	0.158	0.45895
YDR326C	YSP2	1529	0.144517	0.070194	0.10176	0.218151	0.0585339	0.0498055	0.0620119	0.21626	0.0420146	0.166217	0.186185	0.118956	0.165537	0.215154	0.475555	0.347326	0.334405	0.309039	0.471151
YBL085W	BOI1	1530	0.190208	0.085769	0.161791	0.131864	0.0609522	0.0782361	0.0696063	0.225583	0.130444	0.158543	0.147188	0.151805	0.196603	0.147034	0.243988	0.205935	0.23752	0.169258	0.399982
YHR049W	FSH1	1531	0.215102	0.231948	0.189956	0.451629	0.0121724	0.0488172	0.109002	0.0779854	0.123181	0.14313	0.22749	0.151856	0.304431	0.409215	0.269463	0.410124	0.449389	0.421717	0.416407
YNR022C	MRPL50	1532	0.165468	0.225196	0.297264	0.215381	0.153407	0.0656348	0.0507106	0.26907	0.203115	0.222393	0.0939576	0.228333	0.202308	0.296237	0.436874	0.345517	0.364447	0.37898	0.10645
YLR182W	SWI6	1533	0.169752	0.0619296	0.181303	0.198389	0.0600887	0.0413227	0.0510518	0.177035	0.137801	0.0856045	0.171108	0.0978257	0.215407	0.221719	0.360393	0.358953	0.359006	0.217072	0.330091
YKR092C	SRP40	1534	0.161317	0.103208	0.268793	0.131227	0.0596154	0.0816301	0.185807	0.178261	0.243561	0.0675879	0.114059	0.0943753	0.0911066	0.211374	0.34408	0.0609511	0.0180064	0.293512	0.423582
YIL094C	LYS12	1535	0.180983	0.0629069	0.163199	0.184646	0.0147212	0.129825	0.0347746	0.0800173	0.232361	0.00674392	0.0695655	0.0841412	0.0062574	0.28124	0.181065	0.142198	0.17785	0.22073	0.460756
YGL151W	NUT1	1536	0.183687	0.0155913	0.162836	0.258096	0.0262221	0.0747042	0.0291842	0.177035	0.0457312	0.262075	0.153795	0.132686	0.214666	0.102676	0.324724	0.31225	0.21549	0.180205	0.502089
YGR072W	UPF3	1537	0.270412	0.148831	0.266084	0.187362	0.0645239	0.106941	0.190528	0.205244	0.257089	0.0962555	0.105647	0.100134	0.255739	0.264607	0.346915	0.343252	0.0697387	0.309177	0.226102
YOR283W	YOR283W	1538	0.0835388	0.235072	0.0684705	0.206604	0.0876741	0.063992	0.121421	0.0499878	0.183201	0.000444328	0.043194	0.0109687	0.115402	0.25173	0.424516	0.375991	0.693059	0.384246	0.729465
YDR150W	NUM1	1539	0.214072	0.0598592	0.211569	0.242788	0.0570104	0.0411937	0.0830203	0.259272	0.0823282	0.175777	0.116243	0.114242	0.198365	0.204271	0.233238	0.274807	0.188786	0.196552	0.34854
YHL002W	HSE1	1540	0.171622	0.080327	0.171172	0.200742	0.00657174	0.0743832	0.157858	0.26085	0.218739	0.158258	0.107726	0.0653365	0.136051	0.0599665	0.227689	0.320696	0.0731625	0.131746	0.41544
YBR149W	ARA1	1541	0.150291	0.148785	0.0696037	0.232932	0.124868	0.193238	0.0983332	0.222452	0.11541	0.163741	0.0658998	0.128369	0.228051	0.0159032	0.134857	0.00978173	0.244525	0.0785797	0.00963429
YGL090W	LIF1	1542	0.112239	0.0466712	0.131503	0.139108	0.0990607	0.0915197	0.144387	0.215847	0.070279	0.0966361	0.131349	0.192365	0.0963825	0.0814285	0.484846	0.231739	0.231418	0.123203	0.283915
YNL216W	RAP1	1543	0.161418	0.0207537	0.11003	0.171128	0.0635948	0.0320618	0.12033	0.207023	0.116904	0.129446	0.129327	0.155529	0.176138	0.20088	0.305355	0.142017	0.206704	0.209535	0.504967
YLR023C	IZH3	1544	0.135034	0.0431998	0.0702609	0.131824	0.100006	0.0509588	0.0736232	0.152799	0.171394	0.276224	0.190088	0.133113	0.0604454	0.269502	0.453085	0.289156	0.149372	0.24798	0.50555
YBL050W	SEC17	1545	0.123063	0.0793754	0.154996	0.157089	0.0721988	0.0700969	0.121042	0.104016	0.258569	0.1695	0.0355275	0.0733605	0.26075	0.298229	0.0456545	0.347633	0.297571	0.283691	0.260303
YKL154W	SRP102	1546	0.161757	0.0485657	0.205085	0.134526	0.132114	0.0298356	0.00768733	0.0260032	0.104538	0.145071	0.0640639	0.116699	0.254285	0.448552	0.456954	0.400481	0.531059	0.493901	0.540276
YDL073W	YDL073W	1547	0.0906175	0.0640825	0.110887	0.133595	0.039899	0.0659108	0.00217504	0.137218	0.0735699	0.10006	0.162661	0.161537	0.0604618	0.133041	0.380481	0.307683	0.319321	0.257675	0.517038
YPL184C	MRN1	1548	0.144697	0.072445	0.120595	0.156002	0.0927934	0.0984072	0.123239	0.166772	0.15117	0.159924	0.109359	0.235717	0.150174	0.133992	0.319225	0.223257	0.184463	0.109692	0.338634
YIL091C	UTP25	1549	0.163885	0.112334	0.209867	0.0982654	0.119814	0.0544053	0.163994	0.0477492	0.100064	0.0492526	0.0957448	0.0867748	0.0997241	0.337734	0.563771	0.418738	0.482902	0.361224	0.576873
YKL192C	ACP1	1550	0.137948	0.0202721	0.122421	0.215754	0.157606	0.121972	0.0189557	0.30572	0.201197	0.248393	0.139407	0.0378	0.102533	0.190483	0.217071	0.139393	0.315306	0.0956366	0.364995
YJL207C	LAA1	1551	0.154089	0.0442208	0.0946984	0.19142	0.0588479	0.05678	0.114767	0.251909	0.0924312	0.190992	0.167857	0.0985109	0.203818	0.207847	0.370189	0.401913	0.364018	0.259763	0.520082
YLR371W	ROM2	1552	0.0883773	0.0680105	0.0833848	0.129342	0.00682996	0.0316448	0.12007	0.184983	0.117508	0.181616	0.136181	0.20468	0.143936	0.0699795	0.125398	0.18059	0.183284	0.121309	0.315809
YKL213C	DOA1	1553	0.158246	0.11204	0.126626	0.120268	0.052476	0.0988085	0.0989952	0.24882	0.167756	0.127502	0.0301944	0.275046	0.198064	0.0976721	0.108367	0.258524	0.0530025	0.144041	0.305912
YNL156C	NSG2	1554	0.123193	0.104558	0.228175	0.197397	0.137611	0.0307798	0.0758011	0.233156	0.175295	0.129527	0.282061	0.121101	0.287819	0.267031	0.30726	0.280796	0.157641	0.238798	0.364995
YDR390C	UBA2	1555	0.176456	0.0740835	0.151496	0.195762	0.0696493	0.0392441	0.0685454	0.0466772	0.102137	0.0776836	0.170442	0.0957858	0.195192	0.283143	0.441608	0.265721	0.281398	0.236184	0.563147
YPR008W	HAA1	1556	0.128665	0.143217	0.156215	0.252303	0.0550921	0.00255832	0.0516259	0.223951	0.148606	0.209966	0.200368	0.131453	0.149754	0.155736	0.148862	0.160756	0.160745	0.12575	0.332595
YNL039W	BDP1	1557	0.155082	0.0857408	0.177635	0.182572	0.109394	0.0263821	0.0689122	0.0689124	0.183512	0.115393	0.203392	0.17282	0.0807468	0.190054	0.0114773	0.103585	0.223297	0.0472095	0.360485
YEL001C	IRC22	1558	0.24636	0.217273	0.126114	0.158003	0.197841	0.0182436	0.106865	0.504948	0.104967	0.159157	0.0256189	0.116338	0.219093	0.483171	0.400991	0.434203	0.639085	0.555096	0.574468
YDL085C-A	YDL085C-A	1559	0.351571	0.388261	0.371455	0.284135	0.133377	0.20184	0.00341536	0.160448	0.25993	0.0215669	0.128507	0.128221	0.430061	0.279992	0.195098	0.294869	0.387916	0.180031	0.460502
YDR334W	SWR1	1560	0.200076	0.043829	0.134314	0.202634	0.0421266	0.0578984	0.0844919	0.183735	0.0874348	0.154561	0.156597	0.135435	0.173431	0.225993	0.301944	0.444178	0.285595	0.260759	0.434723
YLR133W	CKI1	1561	0.0779028	0.0767025	0.148455	0.114686	0.0402922	0.164701	0.100863	0.346557	0.230729	0.0391546	0.0761279	0.140707	0.168091	0.15857	0.225385	0.239104	0.36613	0.152124	0.254743
YMR129W	POM152	1562	0.116567	0.107677	0.0765327	0.142555	0.0263507	0.0464517	0.121948	0.196379	0.132945	0.085056	0.180646	0.108917	0.112095	0.200565	0.359687	0.330272	0.406055	0.24974	0.537481
YJL069C	UTP18	1563	0.116995	0.0726167	0.257481	0.164588	0.130081	0.00728217	0.257382	0.241815	0.126124	0.0796788	0.0958558	0.0995101	0.109904	0.386569	0.501395	0.347969	0.510772	0.368111	0.546862
YOR323C	PRO2	1564	0.150667	0.0637658	0.0895563	0.137492	0.0172771	0.0399987	0.117226	0.148298	0.162767	0.100823	0.121277	0.0495313	0.177031	0.178383	0.0535303	0.0768006	0.112013	0.188508	0.264552
YLR370C	ARC18	1565	0.156882	0.112364	0.104172	0.340924	0.0968899	0.0977464	0.0560791	0.303411	0.16251	0.338218	0.18135	0.114281	0.344053	0.272269	0.249209	0.286854	0.511687	0.156664	0.227138
YMR305C	SCW10	1566	0.199568	0.0577017	0.126084	0.180708	0.0313404	0.135148	0.0252626	0.171863	0.154403	0.155901	0.114518	0.149751	0.284315	0.244457	0.263544	0.205056	0.073209	0.30267	0.320343
YML031W	NDC1	1567	0.16438	0.111227	0.122498	0.210999	0.111814	0.0777933	0.0638623	0.228664	0.172504	0.114831	0.113726	0.160863	0.0434517	0.219613	0.443364	0.277039	0.0913379	0.274817	0.442938
YJR086W	STE18	1568	0.0790384	0.316044	0.184067	0.34668	0.166646	0.0612215	0.118092	0.0143176	0.403792	0.149924	0.278825	0.0805847	0.286149	0.0136701	0.0673782	0.326176	0.233245	0.603367	0.663911
YCR042C	TAF2	1569	0.147216	0.0606852	0.122294	0.197854	0.0181278	0.0595503	0.0471057	0.199304	0.0614423	0.18716	0.207327	0.167971	0.0839766	0.19436	0.310924	0.398038	0.332058	0.21479	0.481471
YGL091C	NBP35	1570	0.118046	0.197393	0.117866	0.185975	0.118068	0.0881454	0.0242682	0.115643	0.175751	0.14505	0.0358045	0.0489225	0.0586369	0.219135	0.232453	0.251449	0.0858221	0.468808	0.356679
YBR165W	UBS1	1571	0.15207	0.101524	0.0666303	0.187608	0.0535559	0.141557	0.186921	0.247369	0.0380034	0.0606403	0.0974796	0.167399	0.165446	0.290322	0.589628	0.34853	0.247007	0.405623	0.633474
YJL082W	IML2	1572	0.12084	0.0508078	0.060589	0.200589	0.0882143	0.0738554	0.14972	0.301431	0.145729	0.227238	0.155842	0.117475	0.0740262	0.0681563	0.279035	0.138329	0.0206849	0.0264703	0.0207402
YER007C-A	TMA20	1573	0.269912	0.134222	0.150634	0.22021	0.0622149	0.154998	0.211556	0.00232044	0.210577	0.125509	0.0870889	0.19821	0.105593	0.318975	0.715198	0.371983	0.322446	0.22652	0.729465
YPR100W	MRPL51	1574	0.204284	0.186853	0.0992658	0.150652	0.0721532	0.101667	0.137123	0.0210191	0.22163	0.0192298	0.107914	0.0970678	0.417107	0.253939	0.476044	0.22853	0.876419	0.191613	0.410111
YNL219C	ALG9	1575	0.0930493	0.0666963	0.0631339	0.16383	0.0671824	0.0938621	0.0517207	0.22637	0.0955867	0.211146	0.153829	0.216511	0.194306	0.216879	0.33948	0.247993	0.19109	0.277939	0.452785
YOR145C	PNO1	1576	0.362706	0.0914808	0.150667	0.258085	0.104619	0.0451558	0.224506	0.0538056	0.262747	0.0756184	0.035791	0.056569	0.279444	0.463777	0.720997	0.323351	0.671751	0.542809	0.699548
YOR048C	RAT1	1577	0.121822	0.0953947	0.213422	0.178737	0.0710474	0.0752225	0.178188	0.0481895	0.160334	0.0571206	0.131348	0.15646	0.127953	0.28628	0.457472	0.334164	0.557929	0.281921	0.533405
YKR067W	GPT2	1578	0.153157	0.0109661	0.0785004	0.253273	0.0478823	0.0545442	0.0531976	0.201958	0.105467	0.208102	0.158841	0.188887	0.0818465	0.0307294	0.0665772	0.0410077	0.104484	0.0209054	0.114263
YDR166C	SEC5	1579	0.190267	0.102399	0.203017	0.216926	0.0190529	0.0755023	0.124269	0.285308	0.130923	0.196216	0.150715	0.152154	0.35101	0.162138	0.30251	0.325751	0.257453	0.182587	0.403661
YDR337W	MRPS28	1580	0.210464	0.09364	0.129192	0.214703	0.129835	0.0242689	0.0298547	0.116517	0.0932249	0.0877269	0.0949713	0.0501354	0.29971	0.290538	0.431627	0.464966	0.352203	0.252534	0.0472008
YHR021C	RPS27B	1581	0.243444	0.158343	0.0680605	0.263184	0.0587966	0.0361747	0.0157257	0.182246	0.156095	0.112979	0.0470018	0.14818	0.090749	0.405932	0.435444	0.47455	0.561727	0.538152	0.773702
YNL167C	SKO1	1582	0.18932	0.100796	0.187118	0.216636	0.0604374	0.0760081	0.0281314	0.250036	0.0276886	0.112833	0.15795	0.182881	0.152392	0.181146	0.13306	0.0852412	0.0723607	0.194443	0.200374
YEL007W	MIT1	1583	0.105342	0.0469727	0.102332	0.216055	0.102578	0.123004	0.0182545	0.230324	0.134547	0.145995	0.0954408	0.154013	0.213319	0.0069236	0.0522066	0.0825585	0.037358	0.020771	0.103249
YAL019W	FUN30	1584	0.2012	0.129674	0.180035	0.221222	0.117391	0.087384	0.250139	0.0945416	0.103189	0.160629	0.1619	0.190848	0.118826	0.325929	0.511394	0.340946	0.376802	0.21698	0.503783
YOR124C	UBP2	1585	0.161692	0.0596079	0.150519	0.199416	0.0491063	0.0426053	0.0316981	0.277939	0.0630658	0.228811	0.126319	0.202283	0.102117	0.0707774	0.0306685	0.229882	0.0604475	0.0952653	0.279478
YER176W	ECM32	1586	0.223312	0.111171	0.127359	0.166854	0.11974	0.0427437	0.139353	0.143472	0.128499	0.0637344	0.206217	0.0652716	0.0875984	0.147874	0.264802	0.294042	0.30036	0.162792	0.450409
YMR149W	SWP1	1587	0.162099	0.0288723	0.0336946	0.197655	0.0477003	0.174638	0.0386294	0.142978	0.0726966	0.288989	0.0875214	0.0334641	0.201951	0.296017	0.31262	0.284682	0.143376	0.407413	0.37665
YMR064W	AEP1	1588	0.0777325	0.0693283	0.0462894	0.169784	0.0333882	0.0797033	0.0524061	0.253369	0.0163553	0.202663	0.187308	0.130112	0.159348	0.0865071	0.3132	0.222524	0.207808	0.182711	0.336294
YNL232W	CSL4	1589	0.236936	0.119772	0.164093	0.163573	0.103938	0.0321766	0.236923	0.17037	0.0962972	0.0646741	0.046636	0.102835	0.264493	0.398715	0.306337	0.466049	0.354145	0.347402	0.645468
YOR004W	UTP23	1590	0.191864	0.282903	0.27903	0.301284	0.107703	0.136134	0.0514595	0.0724059	0.167046	0.00584833	0.158968	0.0153436	0.265346	0.470599	0.931566	0.37032	0.550554	0.55178	0.888228
YOR315W	SFG1	1591	0.106776	0.133472	0.0622652	0.337222	0.0584743	0.0134037	0.0335207	0.195688	0.0454553	0.201399	0.19625	0.0732775	0.434495	0.325499	0.501818	0.437423	0.448601	0.39933	0.481669
YDL167C	NRP1	1592	0.143828	0.199249	0.218999	0.152377	0.0801085	0.0169458	0.348734	0.104141	0.0946561	0.000344112	0.109098	0.0765806	0.0877439	0.444508	0.614904	0.352356	0.515882	0.428794	0.616039
YOR036W	PEP12	1593	0.174864	0.153593	0.132745	0.239644	0.0697237	0.03117	0.11397	0.195959	0.151468	0.154018	0.0481984	0.0845464	0.248353	0.24239	0.0186428	0.184171	0.227336	0.113198	0.031155
YGL231C	EMC4	1594	0.189298	0.233051	0.301034	0.418126	0.0990144	0.0498784	0.125545	0.012368	0.179418	0.300166	0.108856	0.188547	0.238406	0.203556	0.442852	0.0956882	0.17785	0.398672	0.25956
YMR004W	MVP1	1595	0.277175	0.0542501	0.317744	0.236822	0.0270026	0.0581873	0.0290969	0.153292	0.192152	0.145389	0.0923125	0.18183	0.159078	0.177409	0.222227	0.278915	0.394937	0.219651	0.473665
YGR082W	TOM20	1596	0.217222	0.131235	0.119338	0.293786	0.00997225	0.0616383	0.0853488	0.1329	0.0679422	0.311903	0.110204	0.181875	0.047185	0.153959	0.288505	0.266445	0.096964	0.343078	0.25363
YGR215W	RSM27	1597	0.089163	0.127481	0.274772	0.345371	0.135478	0.0054812	0.00842777	0.121783	0.223966	0.11804	0.0936209	0.18992	0.270642	0.475214	0.228821	0.151357	0.387916	0.34585	0.668515
YDR177W	UBC1	1598	0.226071	0.086592	0.0992971	0.250349	0.132489	0.0994745	0.0239448	0.149485	0.0711923	0.00728302	0.209501	0.0638744	0.183784	0.347139	0.468541	0.100592	0.405062	0.25277	0.518013
YKL015W	PUT3	1599	0.0758198	0.0260737	0.130207	0.203816	0.0253974	0.0643652	0.0668018	0.215629	0.0959085	0.213166	0.134528	0.176976	0.101468	0.121558	0.360162	0.276833	0.253938	0.165948	0.38422
YEL037C	RAD23	1600	0.118289	0.102233	0.209654	0.207362	0.0458694	0.0901523	0.0604936	0.0251112	0.144994	0.060284	0.127216	0.133409	0.217914	0.200119	0.316742	0.184914	0.241718	0.240901	0.507574
YAL036C	RBG1	1601	0.174577	0.184343	0.197054	0.192415	0.0233559	0.111015	0.0428812	0.246655	0.118868	0.0719038	0.0423242	0.106945	0.217448	0.419686	0.600306	0.425211	0.61157	0.422763	0.627117
YLR195C	NMT1	1602	0.148102	0.130194	0.130221	0.204748	0.0943259	0.0804895	0.0346338	0.255682	0.147714	0.18404	0.159238	0.135073	0.14388	0.234881	0.428306	0.355597	0.398255	0.376673	0.632447
YER164W	CHD1	1603	0.168344	0.102353	0.105	0.231992	0.063803	0.0538138	0.071359	0.226292	0.0922028	0.0905226	0.162565	0.173915	0.167115	0.253007	0.239001	0.352613	0.315664	0.262581	0.517705
YLR093C	NYV1	1604	0.093456	0.147276	0.151326	0.17703	0.154722	0.0162042	0.0595365	0.276351	0.124139	0.0633925	0.0946209	0.0166493	0.155528	0.31652	0.327584	0.395114	0.401014	0.28708	0.573543
YLR291C	GCD7	1605	0.194265	0.0903526	0.23082	0.193844	0.0531115	0.0441899	0.0991825	0.124352	0.110919	0.138185	0.0981787	0.0702221	0.166965	0.166418	0.356826	0.276348	0.392782	0.41367	0.513593
YML111W	BUL2	1606	0.111522	0.0327426	0.209781	0.227831	0.0560639	0.0437185	0.0791235	0.189946	0.117135	0.100263	0.106595	0.0797213	0.195158	0.167141	0.309564	0.304355	0.214912	0.165549	0.577828
YDR162C	NBP2	1607	0.0782754	0.124898	0.179158	0.277434	0.103306	0.119642	0.0846959	0.215847	0.0498984	0.107147	0.0366753	0.226331	0.14709	0.311206	0.101753	0.145089	0.2538	0.169634	0.0743653
YKL100C	YPF1	1608	0.126027	0.0919517	0.0577931	0.193039	0.0817224	0.0498507	0.0116885	0.230117	0.0539408	0.311581	0.250788	0.290922	0.118089	0.0166533	0.156051	0.188701	0.0913546	0.00897874	0.320874
YJL060W	BNA3	1609	0.177409	0.128099	0.188467	0.347413	0.0439834	0.107434	0.244965	0.376505	0.167987	0.241246	0.040511	0.197017	0.0755612	0.0148238	0.37958	0.0492957	0.105989	0.058802	0.0296454
YLR086W	SMC4	1610	0.185006	0.0783463	0.193457	0.224376	0.117512	0.0817497	0.13735	0.239124	0.0939283	0.147783	0.208051	0.185952	0.165079	0.204138	0.19088	0.280148	0.227177	0.201886	0.491354
YNL162W	RPL42A	1611	0.0740227	0.172767	0.155201	0.230455	0.0858696	0.0941509	0.0749344	0.0431702	0.170065	0.253636	0.104735	0.0992551	0.0963303	0.450909	0.586525	0.394828	0.569919	0.626219	0.862223
YKR026C	GCN3	1612	0.0146286	0.125049	0.187007	0.181023	0.0406763	0.0834003	0.106981	0.0887027	0.0694673	0.093719	0.0754016	0.0680098	0.0740622	0.38248	0.591289	0.317283	0.370003	0.343426	0.479532
YAL040C	CLN3	1613	0.110785	0.0739892	0.0276462	0.209706	0.0480644	0.117375	0.0581136	0.497173	0.0136772	0.42664	0.223009	0.265407	0.0712613	0.163265	0.0249611	0.150146	0.0465498	0.0861663	0.233806
YJL110C	GZF3	1614	0.142037	0.0209485	0.114119	0.166081	0.10726	0.0545211	0.0811212	0.175549	0.0318419	0.126995	0.082467	0.0406958	0.0581475	0.200967	0.0487188	0.22204	0.259122	0.174087	0.439096
YOR307C	SLY41	1615	0.0792569	0.0864882	0.0772865	0.0196123	0.0955297	0.0938886	0.0402123	0.160547	0.114891	0.0622414	0.14631	0.158279	0.0241667	0.197131	0.412272	0.328001	0.376739	0.283629	0.470951
YBR002C	RER2	1616	0.193949	0.111279	0.0228504	0.149828	0.026647	0.0949894	0.119513	0.0521467	0.0980618	0.0694704	0.0709829	0.0882639	0.0734234	0.258806	0.440019	0.305392	0.432134	0.297077	0.465942
YDR423C	CAD1	1617	0.147626	0.174558	0.255322	0.247763	0.145269	0.0503355	0.163175	0.33191	0.101358	0.303819	0.104375	0.151831	0.184793	0.155234	0.14647	0.174907	0.107702	0.0521586	0.378031
YIL116W	HIS5	1618	0.0261634	0.186782	0.0668996	0.124493	0.136449	0.104362	0.0834942	0.0682184	0.208306	0.165919	0.0417382	0.139509	0.0138011	0.0418983	0.194945	0.0515301	0.27192	0.111501	0.135951
YDR505C	PSP1	1619	0.188289	0.0448227	0.109009	0.262678	0.055987	0.0398501	0.00753461	0.279005	0.0576658	0.169302	0.182723	0.197849	0.191365	0.00668653	0.0516378	0.106767	0.0116506	0.00481768	0.228519
YDR477W	SNF1	1620	0.0675479	0.0232197	0.167193	0.15078	0.0727882	0.0222264	0.00714576	0.27526	0.164527	0.110075	0.0835875	0.179371	0.214436	0.136289	0.255316	0.121968	0.0210084	0.155583	0.281992
YEL043W	YEL043W	1621	0.146415	0.081204	0.213886	0.243635	0.0133462	0.0808652	0.106641	0.209063	0.0498016	0.151179	0.118634	0.289447	0.191128	0.151415	0.15492	0.0799286	0.155887	0.116157	0.282636
YDL095W	PMT1	1622	0.134132	0.141269	0.0941282	0.12763	0.0400842	0.0997079	0.0181099	0.154961	0.202527	0.124269	0.117892	0.24503	0.229705	0.112201	0.032338	0.150391	0.142275	0.144983	0.249291
YPL085W	SEC16	1623	0.24006	0.0593038	0.160915	0.204313	0.0760596	0.037469	0.107811	0.157697	0.107376	0.196824	0.193168	0.12069	0.16603	0.196616	0.248174	0.206173	0.154016	0.222752	0.368503
YGL107C	RMD9	1624	0.0593828	0.0967607	0.0499021	0.144593	0.0618916	0.0530155	0.103594	0.122662	0.0816371	0.101004	0.178165	0.101888	0.102211	0.234488	0.318646	0.232678	0.287502	0.298426	0.475249
YLR312W-A	MRPL15	1625	0.300765	0.114011	0.229971	0.148616	0.0855715	0.0769463	0.0202633	0.136863	0.165528	9.29e-05	0.149545	0.0750672	0.195401	0.323497	0.294001	0.420216	0.502106	0.369077	0.330477
YNR017W	TIM23	1626	0.165781	0.219299	0.14084	0.169315	0.113851	0.100609	0.242919	0.26907	0.203184	0.0149685	0.0877099	0.0895628	0.0895258	0.150381	0.316539	0.0200308	0.351513	0.411047	0.501043
YML015C	TAF11	1627	0.177138	0.123036	0.30535	0.301119	0.179791	0.0101469	0.328448	0.119775	0.178997	0.0339769	0.0965282	0.12458	0.202475	0.279731	0.346915	0.0330802	0.259122	0.269714	0.522456
YMR237W	BCH1	1628	0.137471	0.0816049	0.167523	0.148263	0.0727649	0.0503432	0.0559141	0.241145	0.152399	0.16133	0.121579	0.134789	0.237465	0.166557	0.195098	0.134245	0.107817	0.117766	0.332017
YDR388W	RVS167	1629	0.189219	0.102307	0.258424	0.214868	0.0842298	0.0161683	0.0851713	0.0934171	0.0993207	0.190338	0.181987	0.102362	0.136059	0.00263651	0.10505	0.024045	0.253832	0.0158855	0.149111
YGR123C	PPT1	1630	0.127858	0.111808	0.0855176	0.183377	0.0363703	0.115404	0.158242	0.26907	0.0355182	0.141378	0.178948	0.155398	0.220231	0.337933	0.539611	0.457213	0.601986	0.434416	0.719576
YNL300W	TOS6	1631	0.2013	0.096615	0.30881	0.218513	0.0340171	0.208982	0.183743	0.274288	0.228145	0.543537	0.253015	0.225116	0.460135	0.100916	0.0417013	0.0216718	0.0769518	0.0333443	0.081759
YDR331W	GPI8	1632	0.117512	0.114173	0.0638952	0.298532	0.0290156	0.0316687	0.0636452	0.354578	0.0583058	0.106663	0.0642419	0.10747	0.169832	0.24738	0.513273	0.254168	0.304086	0.269817	0.524255
YKR062W	TFA2	1633	0.101926	0.163287	0.17983	0.149309	0.0631809	0.0761031	0.140663	0.299683	0.139783	0.146737	0.076288	0.125526	0.17778	0.247427	0.217939	0.313246	0.147509	0.330485	0.316296
YPL084W	BRO1	1634	0.150738	0.0859656	0.129193	0.217423	0.0790717	0.0731131	0.051399	0.132753	0.0414016	0.256209	0.121793	0.145967	0.203417	0.20055	0.335482	0.228726	0.185534	0.146235	0.351956
YPL183C	RTT10	1635	0.178259	0.125814	0.0918766	0.157495	0.0757637	0.0732943	0.104636	0.157588	0.0625756	0.0432963	0.209705	0.104542	0.0524608	0.311835	0.570559	0.446473	0.492638	0.362152	0.718576
YGL082W	YGL082W	1636	0.188277	0.107179	0.14865	0.195341	0.161826	0.143623	0.103952	0.12038	0.242947	0.155506	0.262695	0.126305	0.246899	0.0570572	0.0835203	0.176063	0.255248	0.158117	0.257426
YDR389W	SAC7	1637	0.17529	0.0510789	0.0701754	0.186101	0.0479936	0.05875	0.0453297	0.173261	0.0396276	0.128101	0.194582	0.135631	0.0257141	0.198072	0.366249	0.21549	0.252244	0.169143	0.345862
YNL188W	KAR1	1638	0.118496	0.149801	0.248434	0.148828	0.108856	0.0254891	0.101574	0.22483	0.118598	0.144646	0.204428	0.0225514	0.148865	0.216923	0.346915	0.289431	0.251587	0.230267	0.410556
YBR080C	SEC18	1639	0.170649	0.0464262	0.157032	0.126326	0.0469223	0.0784483	0.022501	0.153655	0.0985985	0.208321	0.0922554	0.0807702	0.123695	0.14156	0.0889313	0.242872	0.190722	0.124365	0.381239
YIR006C	PAN1	1640	0.15771	0.101028	0.166813	0.247678	0.0756242	0.0290034	0.119609	0.255511	0.124805	0.208616	0.212623	0.156769	0.091334	0.184235	0.148446	0.224065	0.129146	0.161327	0.34209
YGR274C	TAF1	1641	0.183705	0.0801514	0.175726	0.179918	0.0334278	0.0815697	0.129658	0.207182	0.140761	0.132731	0.160767	0.19342	0.121912	0.149327	0.291671	0.270211	0.242994	0.128918	0.305048
YBR187W	GDT1	1642	0.0730173	0.0717332	0.0799232	0.151553	0.121628	0.176859	0.000561937	0.100701	0.0471739	0.293158	0.0127697	0.0949919	0.14797	0.381398	0.578033	0.171477	0.584837	0.570107	0.407911
YPL143W	RPL33A	1643	0.202749	0.190951	0.0967851	0.140752	0.0769029	0.132	0.0526915	0.0183008	0.260645	0.139095	0.151228	0.0847731	0.261523	0.449671	0.318689	0.349036	0.641682	0.430147	0.706153
YHR030C	SLT2	1644	0.154729	0.0956074	0.0854137	0.234304	0.0787712	0.0996945	0.105328	0.0324444	0.236368	0.0236161	0.0921091	0.158894	0.0932848	0.156417	0.0320109	0.251907	0.219867	0.182513	0.347045
YMR077C	VPS20	1645	0.177462	0.168764	0.244394	0.304037	0.0713252	0.126766	0.0263606	0.216666	0.223892	0.00729689	0.0386504	0.217944	0.429754	0.396663	0.25638	0.367026	0.389367	0.17671	0.756024
YPR189W	SKI3	1646	0.187598	0.0619491	0.180433	0.200295	0.0430881	0.04395	0.0739052	0.26125	0.123243	0.210315	0.214905	0.075319	0.134982	0.229227	0.325149	0.333151	0.287964	0.236086	0.510233
YMR024W	MRPL3	1647	0.153272	0.167172	0.148573	0.219539	0.105923	0.0615851	0.0904485	0.229407	0.167413	0.215125	0.0557742	0.131128	0.147114	0.291684	0.314547	0.320506	0.163629	0.323346	0.482245
YJL044C	GYP6	1648	0.0923483	0.0677798	0.222523	0.185596	0.0648608	0.0438513	0.0392837	0.30476	0.185383	0.177066	0.0748158	0.0697677	0.182465	0.125282	0.435081	0.294869	0.39513	0.246371	0.520796
YDL240W	LRG1	1649	0.141384	0.0631039	0.0703045	0.168403	0.0200483	0.0640988	0.0027878	0.201223	0.0741973	0.16968	0.172611	0.117337	0.214746	0.164924	0.268598	0.286421	0.373823	0.218445	0.431415
YML062C	MFT1	1650	0.140067	0.145636	0.195979	0.194447	0.128785	0.0716813	0.162937	0.350249	0.211477	0.072219	0.202933	0.179382	0.220422	0.270336	0.36793	0.419826	0.246327	0.296495	0.469277
YLR274W	MCM5	1651	0.208897	0.109678	0.160237	0.208903	0.0237913	0.0806109	0.0928081	0.276351	0.18837	0.0911046	0.123168	0.183204	0.120521	0.314431	0.38158	0.360782	0.257337	0.345617	0.521236
YER080W	AIM9	1652	0.19604	0.0630616	0.110445	0.217905	0.0447332	0.0447229	0.0110338	0.0829673	0.0558984	0.241548	0.0839424	0.115098	0.258868	0.208328	0.0374762	0.137525	0.0989623	0.118971	0.325979
YOR001W	RRP6	1653	0.17885	0.0548072	0.144758	0.174845	0.0494515	0.062229	0.154508	0.049723	0.153224	0.163478	0.0710443	0.252339	0.0933508	0.302498	0.510387	0.393221	0.311994	0.296967	0.570452
YKL126W	YPK1	1654	0.162142	0.051948	0.110561	0.229624	0.0994343	0.1594	0.0485255	0.166365	0.107127	0.164513	0.0437852	0.229552	0.12191	0.137914	0.303824	0.268235	0.0726234	0.173799	0.413267
YMR099C	YMR099C	1655	0.153688	0.0130379	0.127898	0.196879	0.0940637	0.133746	0.0484807	0.0447563	0.183097	0.213787	0.144	0.061666	0.204682	0.075848	0.0114557	0.152348	0.0964383	0.148662	0.450193
YDR116C	MRPL1	1656	0.248591	0.139853	0.188293	0.222748	0.13068	0.0589191	0.12322	0.0459802	0.0820547	0.137015	0.19835	0.18602	0.198709	0.189234	0.181344	0.28559	0.330368	0.253169	0.458511
YLR298C	YHC1	1657	0.13811	0.0947311	0.262757	0.279904	0.168815	0.0330342	0.0950095	0.0511326	0.267369	0.00266542	0.184127	0.0585995	0.191447	0.359256	0.323497	0.174305	0.499608	0.363366	0.250628
YBL061C	SKT5	1658	0.128328	0.160886	0.13681	0.117736	0.050192	0.0456088	0.0304948	0.139424	0.0586095	0.0832838	0.0781008	0.0857195	0.11611	0.319777	0.520697	0.326801	0.475487	0.349111	0.511902
YKR059W	TIF1	1659	0.130178	0.0962649	0.103045	0.0722815	0.0859519	0.0522582	0.0162459	0.262725	0.199512	0.19816	0.105755	0.0949102	0.172658	0.359748	0.293224	0.321285	0.295215	0.32484	0.664447
YLR332W	MID2	1660	0.11439	0.0946597	0.104731	0.254723	0.0531112	0.139481	0.230407	0.119574	0.16485	0.23582	0.182029	0.245501	0.23047	0.0616611	0.207967	0.0967888	0.187574	0.289957	0.477259
YDR398W	UTP5	1661	0.151697	0.157301	0.201345	0.187999	0.13665	0.118192	0.214548	0.0220444	0.123822	0.147942	0.159386	0.121544	0.0852479	0.42635	0.544269	0.352816	0.397423	0.403609	0.538309
YMR128W	ECM16	1662	0.196523	0.106049	0.208894	0.14692	0.146953	0.136537	0.293691	0.228238	0.21706	0.0885988	0.145814	0.137593	0.129402	0.431954	0.741351	0.469847	0.514186	0.336396	0.65249
YGR250C	YGR250C	1663	0.227807	0.134683	0.125056	0.239444	0.0432002	0.0694272	0.00731188	0.164557	0.218799	0.133313	0.153435	0.166536	0.160261	0.176261	0.447006	0.0348766	0.381209	0.133559	0.0854309
YOR234C	RPL33B	1664	0.185714	0.066843	0.0733031	0.214705	0.0276337	0.0393361	0.0169682	0.00965373	0.250132	0.0258593	0.0303784	0.0527125	0.160197	0.330173	0.485965	0.279547	0.562907	0.574467	0.678017
YKR089C	TGL4	1665	0.178511	0.0549476	0.108594	0.120342	0.0303237	0.0274786	0.107914	0.250059	0.166829	0.159078	0.11049	0.140773	0.162625	0.0325124	0.0590758	0.153324	0.0166989	0.0552123	0.182367
YPR119W	CLB2	1666	0.123523	0.107856	0.0816709	0.163505	0.0729558	0.0208704	0.0954092	0.392572	0.0829276	0.09783	0.23123	0.171094	0.359434	0.248317	0.304759	0.301178	0.341397	0.337576	0.45688
YPR004C	AIM45	1667	0.084421	0.109974	0.0985023	0.167751	0.0223531	0.163946	0.120492	0.3579	0.126027	0.0981287	0.14595	0.0715511	0.144818	0.31908	0.21896	0.236694	0.427271	0.336925	0.317067
YIL127C	RRT14	1668	0.178348	0.249304	0.430866	0.273278	0.0979768	0.0888551	0.354585	0.281553	0.180407	0.0414765	0.132799	0.0946335	0.234136	0.525644	0.42873	0.397282	0.1942	0.349067	0.629144
YLR079W	SIC1	1669	0.211477	0.122055	0.256021	0.238867	0.182103	0.0747487	0.0830381	0.245627	0.0608658	0.157275	0.150895	0.115597	0.112768	0.167272	0.195937	0.119818	0.0275381	0.255022	0.23092
YIR004W	DJP1	1670	0.130001	0.0330167	0.215763	0.217364	0.0817923	0.0987756	0.151902	0.083632	0.283828	0.225563	0.111269	0.0554178	0.121097	0.23162	0.195098	0.294869	0.208025	0.152295	0.389323
YOR316C	COT1	1671	0.113736	0.0812359	0.109968	0.157485	0.0403526	0.0907948	0.0458602	0.321784	0.0884157	0.247224	0.106517	0.118122	0.141135	0.174684	0.174034	0.323223	0.449389	0.265561	0.294023
YPR161C	SGV1	1672	0.1766	0.0702729	0.122987	0.202258	0.0923924	0.0578469	0.154663	0.137289	0.0950001	0.0896267	0.138727	0.164574	0.157844	0.205963	0.293923	0.181052	0.314805	0.27356	0.317978
YLL014W	EMC6	1673	0.258358	0.105649	0.28208	0.139119	0.134308	0.0282703	0.113772	0.0513253	0.203125	0.153626	0.0719416	0.116057	0.282789	0.779999	0.963846	0.628826	0.600592	0.958752	0.294564
YNL256W	FOL1	1674	0.182139	0.0734169	0.0777641	0.0870554	0.00685793	0.0607551	0.0749572	0.244792	0.0822281	0.117929	0.145063	0.128126	0.0632463	0.349975	0.596628	0.383445	0.452968	0.3637	0.62738
YNL139C	THO2	1675	0.0850749	0.0355251	0.0694423	0.198364	0.0368634	0.0580888	0.00250187	0.280815	0.111828	0.185056	0.169202	0.174447	0.155937	0.25178	0.315427	0.376523	0.202262	0.24049	0.546586
YOR340C	RPA43	1676	0.0534713	0.103018	0.322151	0.176903	0.120305	0.0773399	0.16647	0.277741	0.294514	0.0147228	0.116192	0.0468854	0.107521	0.331347	0.547387	0.364542	0.609102	0.506645	0.65249
YNL306W	MRPS18	1677	0.13139	0.0936163	0.254872	0.163102	0.0923369	0.109298	0.206869	0.102641	0.0848064	0.192654	0.128584	0.152917	0.351699	0.409015	0.0847877	0.300211	0.373176	0.212291	0.315633
YDR313C	PIB1	1678	0.112763	0.0991595	0.18109	0.202694	0.117845	0.0859893	0.093464	0.0388631	0.231034	0.0681215	0.116544	0.251689	0.20785	0.117118	0.369866	0.206267	0.0769518	0.23475	0.425201
YEL052W	AFG1	1679	0.146939	0.182257	0.104329	0.112298	0.0589583	0.0574709	0.00593305	0.057866	0.0967035	0.0788974	0.0698787	0.0624648	0.12423	0.3488	0.185521	0.373134	0.460627	0.376758	0.300358
YOR056C	NOB1	1680	0.161485	0.19885	0.212062	0.153993	0.148849	0.109068	0.175735	0.0731742	0.0900688	0.00782185	0.0901434	0.0743387	0.150007	0.381847	0.659993	0.288973	0.509326	0.416614	0.821319
YGL194C	HOS2	1681	0.0652634	0.124506	0.18557	0.230994	0.105547	0.0740206	0.00306296	0.177035	0.110216	0.227004	0.13922	0.12498	0.0990637	0.117671	0.310448	0.242105	0.291509	0.244648	0.271654
YOR101W	RAS1	1682	0.257401	0.27081	0.161871	0.112675	0.12953	0.0369279	0.10031	0.307803	0.0847929	0.119222	0.0760746	0.0866122	0.181031	0.428274	0.637201	0.438253	0.468974	0.492289	0.507574
YKR096W	ESL2	1683	0.166661	0.0496496	0.137754	0.222011	0.0460392	0.0363979	0.00968209	0.26907	0.124387	0.187136	0.135266	0.143958	0.0571526	0.1405	0.198106	0.271574	0.0255839	0.108704	0.288042
YKL109W	HAP4	1684	0.178273	0.301683	0.602446	0.655856	0.107511	0.250035	0.342316	0.478277	0.347917	0.570212	0.225833	0.139337	0.702653	0.115999	0.105101	0.251284	0.0638088	0.106842	0.207534
YLR275W	SMD2	1685	0.273279	0.201802	0.164603	0.169688	0.168283	0.0397734	0.18951	0.136863	0.0638818	0.072788	0.0452389	0.0549384	0.250108	0.410629	0.465108	0.533738	0.414729	0.438659	0.482245
YGL020C	GET1	1686	0.115368	0.13139	0.220068	0.197603	0.0774244	0.0847265	0.0264961	0.4191	0.0506803	0.0500078	0.0506341	0.0745393	0.31437	0.290271	0.417099	0.330405	0.482143	0.2476	0.511292
YML105C	SEC65	1687	0.178486	0.115178	0.221621	0.242311	0.112818	0.0504688	0.0825434	0.0285997	0.0865612	0.10131	0.179151	0.0712798	0.173115	0.23436	0.309392	0.204699	0.409795	0.207697	0.469829
YOR030W	DFG16	1688	0.107251	0.1014	0.171041	0.183733	0.0617877	0.0255801	0.0308341	0.129412	0.111407	0.0851077	0.0807791	0.21982	0.221008	0.140891	0.244867	0.229945	0.251813	0.173822	0.382144
YKL049C	CSE4	1689	0.216788	0.228243	0.278462	0.250638	0.117127	0.0975226	0.289711	0.238652	0.0618863	0.0780878	0.115947	0.12876	0.175606	0.224649	0.427426	0.397282	0.196377	0.346085	0.16424
YLR412W	BER1	1690	0.170147	0.109913	0.181379	0.154479	0.0771062	0.0732022	0.139649	0.325085	0.202243	0.112947	0.0736815	0.160159	0.150547	0.359175	0.429947	0.485259	0.127005	0.33501	0.504828
YLR301W	HRI1	1691	0.168315	0.0939286	0.202337	0.155623	0.178448	0.039161	0.043784	0.0424807	0.141102	0.127741	0.0534199	0.0595794	0.290511	0.321071	0.480244	0.444477	0.458926	0.438	0.657804
YLR305C	STT4	1692	0.167303	0.0278123	0.105329	0.170848	0.0553828	0.0710524	0.0342649	0.136461	0.104723	0.187329	0.163918	0.108974	0.148206	0.205652	0.351479	0.333943	0.317949	0.297035	0.509983
YOR322C	LDB19	1693	0.134	0.0539251	0.0751313	0.122597	0.0402609	0.0577294	0.023401	0.0786392	0.212224	0.0989201	0.141813	0.0879673	0.0684028	0.153944	0.0560543	0.209342	0.128231	0.169265	0.417687
YMR298W	LIP1	1694	0.187671	0.201262	0.098829	0.238096	0.108681	0.218771	0.0320336	0.404302	0.119171	0.178733	0.111043	0.17975	0.264459	0.410966	0.421118	0.294869	0.153377	0.276305	0.687624
YDR184C	ATC1	1695	0.163362	0.147663	0.291937	0.294197	0.151387	0.0596412	0.343397	0.0642859	0.261897	0.0585335	0.13529	0.082132	0.153413	0.422793	0.895151	0.507963	0.601721	0.451429	0.684792
YDL037C	BSC1	1696	0.40441	0.161325	0.287663	0.127632	0.136567	0.148889	0.392659	0.290752	0.0297797	0.273108	0.82684	0.269559	0.367891	0.816661	1.08496	0.849545	0.866402	0.986845	1.11257
YNL201C	PSY2	1697	0.144578	0.137668	0.0965831	0.143489	0.0229402	0.068569	0.188218	0.0561756	0.116776	0.172377	0.156322	0.112668	0.123429	0.249006	0.45645	0.338264	0.437734	0.251067	0.496571
YHR107C	CDC12	1698	0.188977	0.130556	0.20768	0.23917	0.061791	0.0626496	0.0940862	0.0762207	0.160151	0.156257	0.111811	0.138578	0.0432659	0.144258	0.302741	0.26337	0.20139	0.245614	0.593295
YGR251W	NOP19	1699	0.264963	0.152918	0.231357	0.0978675	0.136283	0.0342571	0.221273	0.30572	0.200316	0.238038	0.0589119	0.0275009	0.179578	0.4678	0.42873	0.55682	0.349138	0.399998	0.482245
YDR141C	DOP1	1700	0.144259	0.0522686	0.0412127	0.186294	0.0428983	0.0782893	0.0206072	0.25245	0.0578548	0.158092	0.140643	0.15363	0.248466	0.204076	0.186402	0.287559	0.281852	0.16996	0.444512
YHR009C	TDA3	1701	0.176325	0.0711197	0.026842	0.142151	0.0723637	0.13207	0.00242907	0.150707	0.154971	0.117925	0.10129	0.211654	0.107406	0.205991	0.010496	0.0976735	0.0716791	0.133094	0.356238
YDL060W	TSR1	1702	0.263984	0.0811211	0.260389	0.178348	0.0728793	0.0738468	0.267336	0.00300418	0.168151	0.0637562	0.124852	0.138783	0.133971	0.38923	0.721568	0.371139	0.474729	0.414897	0.620824
YNL081C	SWS2	1703	0.231234	0.0920082	0.180216	0.193229	0.0572376	0.025866	0.136291	0.400978	0.146093	0.173383	0.151746	0.0228143	0.303913	0.389065	0.389453	0.309077	0.205074	0.527506	0.457574
YCL010C	SGF29	1704	0.14304	0.0923488	0.0499882	0.0532004	0.082044	0.0853798	0.032749	0.0651696	0.246096	0.104096	0.109003	0.224178	0.160046	0.0145531	0.0385541	0.177812	0.139409	0.170465	0.347094
YMR272C	SCS7	1705	0.116551	0.0569766	0.11847	0.201461	0.0780094	0.13944	0.0178078	0.0745144	0.0950354	0.0788618	0.158796	0.195047	0.213428	0.0945507	0.0268337	0.0135004	0.000974397	0.176493	0.0646371
YER178W	PDA1	1706	0.160369	0.0251444	0.124429	0.12847	0.0998244	0.124182	0.0306269	0.0143176	0.0772005	0.183725	0.0884173	0.061128	0.116455	0.130126	0.154305	0.0294321	0.0582708	0.280374	0.361916
YLR363C	NMD4	1707	0.210232	0.192623	0.101499	0.204722	0.102161	0.097368	0.119998	0.239531	0.233875	0.150192	0.173976	0.177141	0.165193	0.0424293	0.42873	0.434421	0.275613	0.420786	0.372441
YIR018W	YAP5	1708	0.130794	0.133121	0.35725	0.373078	0.123354	0.0451769	0.129406	0.315546	0.197379	0.0502065	0.164148	0.117451	0.142112	0.130521	0.322514	0.10562	0.15875	0.307735	0.364995
YGL056C	SDS23	1709	0.135189	0.100034	0.144034	0.153621	0.133461	0.0331939	0.176345	0.14727	0.132249	0.076163	0.136685	0.125595	0.0366799	0.20789	0.453058	0.0414426	0.132769	0.233509	0.368753
YNL075W	IMP4	1710	0.198463	0.119157	0.274726	0.203491	0.0934016	0.144667	0.220315	0.08345	0.107141	0.150448	0.0264477	0.0228445	0.304282	0.476966	0.469971	0.513262	0.567095	0.394823	0.570268
YDR120C	TRM1	1711	0.207515	0.0865594	0.177431	0.122665	0.17841	0.0973016	0.184989	0.029886	0.204713	0.0697413	0.140727	0.0396473	0.140945	0.415915	0.678868	0.330088	0.345321	0.42683	0.513176
YGL171W	ROK1	1712	0.188958	0.115602	0.31893	0.13533	0.177535	0.146406	0.386609	0.116391	0.132917	0.00862439	0.201127	0.0982192	0.0485924	0.330935	0.750012	0.48654	0.658362	0.4268	0.641502
YDR373W	FRQ1	1713	0.266611	0.15133	0.098265	0.136711	0.171874	0.0739093	0.200358	0.012368	0.0728978	0.127502	0.037552	0.0910924	0.290068	0.29853	0.339039	0.41321	0.632517	0.546899	0.59143
YKL211C	TRP3	1714	0.0855468	0.0886325	0.0399061	0.200802	0.0692568	0.0952554	0.075862	0.0719205	0.171363	0.0282106	0.127024	0.0683392	0.108107	0.0162071	0.132832	0.0670529	0.00958012	0.00956411	0.203287
YDL207W	GLE1	1715	0.133883	0.131231	0.234675	0.1959	0.123039	0.0638728	0.186537	0.192538	0.119574	0.0730818	0.20771	0.110478	0.155999	0.230604	0.395698	0.254031	0.256667	0.224508	0.284548
YLR401C	DUS3	1716	0.16568	0.120552	0.218346	0.152611	0.101258	0.0500918	0.197575	0.0875696	0.245151	0.106794	0.137036	0.161538	0.150888	0.291512	0.640581	0.289946	0.443925	0.332019	0.59682
YLR321C	SFH1	1717	0.174564	0.0719744	0.227942	0.193836	0.0546855	0.052508	0.210287	0.227885	0.172648	0.155875	0.126758	0.0908094	0.149298	0.0762515	0.142968	0.280796	0.205343	0.140646	0.382229
YLR038C	COX12	1718	0.160851	0.324811	0.196598	0.319227	0.229044	0.0488981	0.0789383	0.342653	0.301362	0.262075	0.0377701	0.0583444	0.49082	0.401956	0.234579	0.219442	0.335298	0.440431	0.415912
YNR047W	FPK1	1719	0.173383	0.0655376	0.160862	0.201996	0.00484606	0.0930749	0.127329	0.19574	0.0264324	0.142484	0.164495	0.133117	0.0685521	0.164729	0.131757	0.129967	0.054187	0.12712	0.341314
YLR185W	RPL37A	1720	0.207889	0.251029	0.0735607	0.180763	0.0212992	0.0800683	0.0240391	0.119284	0.0910258	0.134167	0.0471849	0.0969425	0.0728564	0.384853	0.0258198	0.112131	0.361943	0.321006	0.338457
YDR232W	HEM1	1721	0.123719	0.129217	0.0752948	0.114991	0.1057	0.123355	0.0248701	0.00157257	0.126449	0.0786749	0.0900755	0.171911	0.124571	0.230275	0.121135	0.130532	0.122634	0.18057	0.322788
YOR075W	UFE1	1722	0.175137	0.123942	0.214029	0.266027	0.087208	0.0653125	0.0640995	0.226555	0.148296	0.150321	0.13044	0.123249	0.199851	0.253364	0.413985	0.432627	0.280753	0.270659	0.451507
YMR314W	PRE5	1723	0.316215	0.291129	0.17495	0.310772	0.0811295	0.0667056	0.138244	0.0860395	0.422174	0.276151	0.162233	0.112621	0.480483	0.403136	0.277981	0.340148	0.529407	0.162656	0.378567
YBL103C	RTG3	1724	0.195214	0.0710164	0.0490325	0.0842289	0.0935947	0.0235298	0.0369933	0.00872822	0.10145	0.0947337	0.144298	0.0703601	0.0147651	0.0392278	0.199339	0.0296497	0.0941257	0.0576119	0.253105
YDR464W	SPP41	1725	0.154863	0.0488892	0.185698	0.184458	0.18116	0.0341338	0.166223	0.193667	0.0978977	0.113985	0.148363	0.12882	0.0896594	0.242037	0.274201	0.247406	0.155079	0.24203	0.400305
YNL301C	RPL18B	1726	0.107147	0.158334	0.105797	0.109407	0.0400246	0.108496	0.152471	0.27833	0.305895	0.259046	0.161231	0.231012	0.154867	0.498306	0.272437	0.386084	0.495206	0.426375	0.48803
YPR042C	PUF2	1727	0.169075	0.0113962	0.0798305	0.183812	0.0240839	0.10235	0.00605281	0.262584	0.190405	0.162024	0.11231	0.152289	0.24298	0.123565	0.224969	0.23057	0.152434	0.120961	0.375137
YDR041W	RSM10	1728	0.157419	0.16139	0.0656257	0.303923	0.0956923	0.112782	0.00990604	0.465463	0.142286	0.107147	0.175191	0.0734661	0.316437	0.224523	0.244401	0.127689	0.527305	0.246214	0.418672
YBR245C	ISW1	1729	0.163377	0.0991913	0.0923516	0.2115	0.0518676	0.0865045	0.000469646	0.223037	0.170614	0.204025	0.133821	0.21051	0.178031	0.229772	0.210604	0.367948	0.308212	0.175048	0.467031
YDR138W	HPR1	1730	0.0478787	0.0720069	0.0927577	0.103939	0.0720117	0.0814006	0.0519047	0.243013	0.0424046	0.0815907	0.130703	0.123472	0.090803	0.143606	0.308177	0.30542	0.209458	0.155424	0.347067
YJL096W	MRPL49	1731	0.200232	0.126786	0.271286	0.128802	0.0392467	0.0541081	0.00478042	0.120486	0.104108	0.135798	0.158848	0.131524	0.418313	0.54665	0.465108	0.415557	0.429733	0.450821	0.493675
YIL062C	ARC15	1732	0.182286	0.0980036	0.224199	0.358412	0.100202	0.0896781	0.0494499	0.106982	0.20619	0.0777096	0.158374	0.128021	0.464499	0.453431	0.36049	0.167835	0.330368	0.359784	0.515714
YDL135C	RDI1	1733	0.223413	0.186095	0.161921	0.191506	0.111825	0.158885	0.0827005	0.177035	0.037943	0.116763	0.0505312	0.195653	0.303832	0.340249	0.591289	0.316498	0.278764	0.2196	0.423771
YIL084C	SDS3	1734	0.174205	0.0326202	0.0313565	0.196943	0.150223	0.0779932	0.118092	0.130124	0.0994083	0.11305	0.144198	0.164757	0.0891379	0.0678465	0.0690361	0.278977	0.142501	0.0473198	0.274577
YNL161W	CBK1	1735	0.186579	0.120325	0.179277	0.202672	0.143799	0.0152674	0.206199	0.143531	0.10275	0.108487	0.0910932	0.130642	0.0455609	0.163056	0.130083	0.189523	0.171402	0.212291	0.275453
YDR458C	HEH2	1736	0.139669	0.0687583	0.176654	0.156306	0.0376055	0.0746216	0.0716945	0.249601	0.0398396	0.177799	0.13454	0.157047	0.255797	0.275274	0.383321	0.303528	0.251102	0.130869	0.260815
YML092C	PRE8	1737	0.271842	0.0257646	0.139271	0.179909	0.0928186	0.117081	0.0670042	0.114352	0.167073	0.146486	0.0513432	0.095875	0.211587	0.325803	0.338364	0.2289	0.376455	0.435009	0.457574
YHR013C	ARD1	1738	0.159374	0.139178	0.139468	0.1451	0.0798631	0.0713179	0.150013	0.0345157	0.099672	0.0773693	0.0829404	0.162127	0.0915929	0.216793	0.274201	0.185922	0.496799	0.298553	0.639218
YGL148W	ARO2	1739	0.180505	0.0733638	0.0583715	0.185743	0.00894222	0.184929	0.0245221	0.0428059	0.181528	0.0876936	0.0931412	0.0245687	0.182049	0.230807	0.0954981	0.112108	0.0747441	0.330816	0.341894
YGL055W	OLE1	1740	0.0492878	0.156544	0.0669313	0.115711	0.0323037	0.290111	0.00615725	0.277422	0.121305	0.0862667	0.142584	0.23308	0.203532	0.383981	0.657213	0.246771	0.31616	0.446388	0.692206
YDR001C	NTH1	1741	0.159763	0.0286305	0.101788	0.218289	0.0928739	0.0969319	0.0528426	0.0981197	0.154705	0.192846	0.152236	0.203436	0.0516521	0.171838	0.368615	0.0586965	0.407697	0.261258	0.0835842
YOR095C	RKI1	1742	0.216628	0.0136833	0.218449	0.115303	0.0469274	0.148223	0.107563	0.0637431	0.221367	0.241166	0.111054	0.064442	0.202004	0.561719	0.887771	0.608317	0.603218	0.770399	0.798131
YGR074W	SMD1	1743	0.227857	0.115658	0.132611	0.206966	0.0683854	0.127301	0.15885	0.231007	0.260434	0.0800942	0.11945	0.160707	0.0378056	0.31904	0.663141	0.497889	0.17785	0.444037	0.433538
YJL129C	TRK1	1744	0.103394	0.0654574	0.143302	0.235985	0.109353	0.0434166	0.180531	0.205424	0.0599448	0.202991	0.124475	0.133216	0.098123	0.221148	0.267968	0.252277	0.299867	0.242739	0.503184
YHR090C	YNG2	1745	0.176627	0.0900637	0.219971	0.237239	0.153844	0.0281869	0.139749	0.114352	0.234296	0.161663	0.222458	0.109321	0.134376	0.299322	0.223331	0.109347	0.223297	0.104091	0.505785
YHR152W	SPO12	1746	0.183077	0.189064	0.417596	0.331365	0.140333	0.034925	0.246922	0.241145	0.184023	0.0616775	0.0706353	0.086903	0.259504	0.202778	0.594748	0.441769	0.278764	0.386169	0.139468
YGL039W	YGL039W	1747	0.157546	0.0925884	0.267875	0.16404	0.0955012	0.113792	0.215456	0.167209	0.208542	0.218696	0.128231	0.0161493	0.0734113	0.294298	0.405857	0.206913	0.532392	0.194186	0.456859
YKL099C	UTP11	1748	0.137634	0.109846	0.273233	0.28894	0.163137	0.118174	0.356072	0.0960754	0.125499	0.0882688	0.0569009	0.0868603	0.200674	0.472624	0.581263	0.111334	0.487097	0.573615	0.431244
YOL030W	GAS5	1749	0.135555	0.0276987	0.136151	0.221239	0.0838124	0.148187	0.0275314	0.0955079	0.208905	0.254173	0.109955	0.173528	0.211393	0.190194	0.0868641	0.180546	0.139186	0.14461	0.34416
YIL031W	ULP2	1750	0.163764	0.0650064	0.0970968	0.170218	0.062797	0.0415727	0.10659	0.29716	0.0853533	0.139438	0.156641	0.180458	0.198647	0.176188	0.368617	0.247325	0.338411	0.199249	0.399302
YBR058C-A	TSC3	1751	0.183124	0.126219	0.104392	0.159269	0.0192692	0.127752	0.0714407	0.0344604	0.265798	0.27673	0.00979014	0.146808	0.360099	0.514499	0.389453	0.716477	0.809737	0.700733	0.826846
YPL189C-A	COA2	1752	0.138773	0.246322	0.231363	0.155499	0.160887	0.176372	0.204635	0.257401	0.0629139	0.0522933	0.0921919	0.0847811	0.194982	0.0582997	0.421118	0.0369104	0.0152593	0.405623	0.208011
YPL211W	NIP7	1753	0.269669	0.172814	0.177228	0.159604	0.0527535	0.136791	0.0228571	0.211011	0.144678	0.161297	0.166283	0.127635	0.199595	0.647606	0.745052	0.775038	0.84516	0.74361	0.908097
YLR114C	AVL9	1754	0.149282	0.084249	0.120967	0.155205	0.0581805	0.0360746	0.137512	0.106994	0.0816511	0.157418	0.173909	0.0893973	0.121992	0.226665	0.261076	0.292266	0.227045	0.19025	0.440853
YHR123W	EPT1	1755	0.141121	0.0826405	0.134503	0.202286	0.077226	0.031537	0.202249	0.337425	0.197367	0.118564	0.209438	0.17456	0.0502231	0.189475	0.231159	0.254438	0.268372	0.443956	0.464557
YOR272W	YTM1	1756	0.17074	0.156004	0.168472	0.254183	0.180811	0.207543	0.356685	0.0471907	0.156819	0.0399471	0.0582007	0.0687185	0.157051	0.414407	0.661156	0.372162	0.491792	0.510326	0.772526
YPR025C	CCL1	1757	0.0887869	0.0448487	0.204562	0.294975	0.0924942	0.0579172	0.264908	0.0974713	0.0358103	0.0387942	0.117948	0.0368894	0.104259	0.27215	0.267587	0.3041	0.365378	0.246021	0.422242
YBL033C	RIB1	1758	0.131434	0.077291	0.081464	0.308789	0.121615	0.208155	0.112447	0.101821	0.23265	0.103917	0.0933241	0.0456089	0.0374902	0.254572	0.12418	0.126969	0.059387	0.359443	0.247923
YGR261C	APL6	1759	0.198655	0.0988493	0.137128	0.191322	0.0524428	0.0856553	0.00517767	0.277032	0.0854344	0.180021	0.144523	0.194626	0.12746	0.173291	0.214878	0.330727	0.334357	0.150653	0.519411
YLR045C	STU2	1760	0.161051	0.0938685	0.184654	0.115498	0.110089	0.0337841	0.111726	0.1706	0.0436116	0.137744	0.107958	0.114495	0.204583	0.17118	0.348639	0.282071	0.0772624	0.0901388	0.310667
YDR161W	YDR161W	1761	0.12343	0.144929	0.15246	0.154098	0.0563094	0.0457651	0.339975	0.0960189	0.129676	0.0541676	0.088991	0.068054	0.123159	0.394652	0.659542	0.398781	0.647155	0.535506	0.54526
YKR056W	TRM2	1762	0.196654	0.091113	0.242443	0.175971	0.158521	0.102771	0.168919	0.107815	0.0655305	0.00852553	0.0591714	0.170199	0.171508	0.390818	0.572641	0.459984	0.531534	0.378611	0.673745
YDR189W	SLY1	1763	0.101615	0.0815095	0.132814	0.163379	0.0655531	0.115561	0.0455571	0.130552	0.112693	0.180346	0.170443	0.111409	0.125413	0.144184	0.27562	0.204137	0.189093	0.237518	0.358285
YBR151W	APD1	1764	0.258368	0.204674	0.0506905	0.194763	0.1151	0.0326009	0.137892	0.102733	0.220256	0.23646	0.058	0.205389	0.230512	0.115617	0.102992	0.138329	0.0643116	0.0623348	0.129639
YNR074C	AIF1	1765	0.181649	0.0513977	0.0763628	0.181435	0.146276	0.0755484	0.0479348	0.0373784	0.204246	0.0557704	0.0857048	0.141582	0.0601497	0.413459	0.147031	0.42525	0.493925	0.411709	0.569391
YKL167C	MRP49	1766	0.244241	0.146409	0.313264	0.37169	0.086293	0.0504269	0.121908	0.26907	0.254294	0.14003	0.126766	0.112663	0.325746	0.505683	0.319654	0.385807	0.449389	0.261398	0.186821
YIL129C	TAO3	1767	0.161531	0.0312606	0.0930716	0.211166	0.0795699	0.0294408	0.0235416	0.18274	0.0466553	0.206736	0.170323	0.103313	0.120509	0.16205	0.27729	0.322315	0.194513	0.193415	0.445154
YDR454C	GUK1	1768	0.239759	0.0879333	0.12188	0.173986	0.165132	0.0414445	0.143901	0.197582	0.166779	0.309226	0.106354	0.0289103	0.170381	0.530173	0.330724	0.300008	0.449389	0.289878	0.75214
YDL027C	YDL027C	1769	0.101387	0.121974	0.0457055	0.222868	0.089216	0.151454	0.193088	0.425671	0.0617734	0.246028	0.183944	0.222156	0.33455	0.136256	0.11363	0.368154	0.272368	0.051991	0.17545
YBR166C	TYR1	1770	0.0339121	0.0575167	0.0575498	0.128721	0.0935992	0.115974	0.0606481	0.0305694	0.0409209	0.11421	0.0721431	0.0717242	0.0879129	0.118272	0.486084	0.358055	0.408833	0.109607	0.439328
YGL200C	EMP24	1771	0.101187	0.0962839	0.150886	0.296911	0.164677	0.145252	0.0150491	0.180454	0.370201	0.0491813	0.00469746	0.122636	0.393969	0.265278	0.208293	0.0591542	0.154209	0.331974	0.388883
YOL158C	ENB1	1772	0.0941191	0.253482	0.0976684	0.24423	0.0835295	0.1314	0.0724054	0.0914401	0.171764	0.278	0.145077	0.154234	0.101604	0.280303	0.206941	0.303057	0.575294	0.337515	0.505971
YDR297W	SUR2	1773	0.113046	0.100377	0.0874611	0.109312	0.0186765	0.188263	0.00748499	0.296779	0.0559216	0.0372382	0.121763	0.200384	0.238249	0.382569	0.378168	0.509925	0.393336	0.470668	0.653888
YGL187C	COX4	1774	0.103132	0.082854	0.110938	0.154164	0.285799	0.11829	0.0995675	0.1329	0.294877	0.0973085	0.0738649	0.143758	0.159975	0.335382	0.158263	0.251251	0.139267	0.357207	0.391259
YDR301W	CFT1	1775	0.146499	0.0641666	0.0536836	0.133812	0.0157641	0.0545254	0.0077523	0.1076	0.166425	0.0485762	0.150638	0.205081	0.16386	0.126813	0.162097	0.289371	0.266331	0.145746	0.360987
YGR084C	MRP13	1776	0.121517	0.197764	0.167645	0.197913	0.085887	0.0430634	0.158487	0.263314	0.341878	0.121581	0.177627	0.074899	0.0716342	0.311781	0.431627	0.46358	0.377486	0.415788	0.604073
YHR197W	RIX1	1777	0.149041	0.150926	0.261775	0.193551	0.185903	0.107015	0.361841	0.117481	0.137308	0.0211616	0.19108	0.10591	0.019267	0.419809	0.756465	0.493168	0.621564	0.459311	0.795067
YNR053C	NOG2	1778	0.202469	0.218634	0.0772835	0.197613	0.158879	0.187645	0.284938	0.0950158	0.105464	0.0739034	0.0768517	0.105094	0.0239438	0.370683	0.627361	0.395729	0.444403	0.48418	0.615128
YGR008C	STF2	1779	0.115243	0.257014	0.244982	0.404618	0.20338	0.274706	0.397338	0.26907	0.14518	0.0887994	0.338212	0.266492	0.374675	0.147698	0.863649	0.351909	0.779939	0.446004	0.392801
YKR030W	GMH1	1780	0.113104	0.149091	0.137929	0.104017	0.0462737	0.107415	0.0437629	0.105043	0.158893	0.0829553	0.106567	0.215238	0.264272	0.340961	0.507697	0.452871	0.74385	0.293486	0.682714
YLR254C	NDL1	1781	0.279386	0.157427	0.357489	0.25272	0.148291	0.0244278	0.0486705	0.317999	0.227347	0.172317	0.0972188	0.0519009	0.175754	0.285511	0.0266761	0.381535	0.0498548	0.418964	0.293028
YDR017C	KCS1	1782	0.10386	0.0308959	0.0569693	0.146338	0.0454489	0.0485739	0.0384193	0.383312	0.0914668	0.0719059	0.181023	0.159163	0.0425014	0.215706	0.519362	0.269959	0.445521	0.185392	0.525843
YGL094C	PAN2	1783	0.156351	0.0607462	0.129897	0.180779	0.0467075	0.0238965	0.00647435	0.222608	0.0346916	0.170121	0.167323	0.15628	0.217331	0.170759	0.322994	0.281127	0.202129	0.200993	0.504601
YNL261W	ORC5	1784	0.12946	0.115975	0.10353	0.236166	0.119928	0.0680466	0.117853	0.197452	0.0912383	0.192129	0.0801358	0.125793	0.121302	0.262875	0.488886	0.404201	0.254314	0.355959	0.558313
YBR281C	DUG2	1785	0.217578	0.127741	0.332387	0.299716	0.0325029	0.0908463	0.20337	0.243637	0.0652346	0.0758616	0.127836	0.171299	0.0869544	0.202496	0.166576	0.247054	0.275396	0.262204	0.417703
YLR166C	SEC10	1786	0.10875	0.0119212	0.128988	0.168695	0.0347602	0.0379307	0.120299	0.215098	0.146233	0.113126	0.187115	0.0716403	0.237473	0.20783	0.345514	0.4029	0.254255	0.243575	0.364995
YEL056W	HAT2	1787	0.268725	0.130933	0.157651	0.242871	0.0167845	0.0694586	0.0467831	0.22483	0.259942	0.13394	0.0764379	0.0883299	0.074561	0.170529	0.0928667	0.187346	0.205074	0.173911	0.39482
YJL165C	HAL5	1788	0.154028	0.0551988	0.100335	0.169685	0.050461	0.0403647	0.0468513	0.0627655	0.0822826	0.0430028	0.156514	0.120393	0.225383	0.171295	0.130017	0.239159	0.138968	0.133469	0.330283
YOR109W	INP53	1789	0.0976397	0.0604646	0.144296	0.116297	0.0562838	0.0333464	0.0560693	0.228191	0.0696524	0.235132	0.201176	0.116258	0.184507	0.139224	0.290013	0.236321	0.209598	0.123168	0.396115
YJL005W	CYR1	1790	0.181544	0.0676736	0.119698	0.227637	0.0488354	0.0482334	0.0421941	0.289851	0.0771776	0.216523	0.177451	0.102587	0.183402	0.0521656	0.0352751	0.111009	0.0609855	0.0307268	0.193607
YPL020C	ULP1	1791	0.200392	0.0173969	0.196628	0.155626	0.0770447	0.0856767	0.010772	0.164789	0.0945486	0.13963	0.163137	0.0900265	0.0345581	0.187813	0.254627	0.252143	0.389513	0.115313	0.288553
YMR001C	CDC5	1792	0.14286	0.0829517	0.0376147	0.156626	0.0416792	0.0480882	0.030596	0.408073	0.150859	0.0616775	0.0486665	0.0589581	0.226307	0.27384	0.423553	0.352909	0.296131	0.201441	0.437429
YOR035C	SHE4	1793	0.156498	0.0820063	0.107141	0.249207	0.0838084	0.0297043	0.122102	0.226412	0.0983651	0.230519	0.236109	0.174729	0.111056	0.0561119	0.222494	0.228077	0.0793711	0.0692267	0.252342
YCL045C	EMC1	1794	0.0896424	0.0799124	0.115248	0.246521	0.0615983	0.0737196	0.0686256	0.193547	0.166908	0.233848	0.107742	0.265038	0.185848	0.136365	0.197527	0.159385	0.169509	0.25963	0.395421
YKL186C	MTR2	1795	0.18293	0.210589	0.283145	0.296053	0.0729877	0.133006	0.183199	0.110758	0.187887	0.0374505	0.132636	0.150215	0.197847	0.165364	0.524241	0.380079	0.233245	0.306649	0.657804
YPL070W	MUK1	1796	0.190218	0.106325	0.193482	0.227793	0.0696649	0.034422	0.056835	0.188668	0.0137646	0.072509	0.136051	0.188465	0.168097	0.120392	0.142897	0.201752	0.213063	0.156808	0.531563
YKR002W	PAP1	1797	0.230038	0.0482372	0.10122	0.162194	0.0826173	0.0359812	2.04e-05	0.165887	0.126163	0.256905	0.116902	0.180211	0.334031	0.131017	0.17524	0.269437	0.32646	0.214224	0.433986
YBR267W	REI1	1798	0.246474	0.106183	0.187025	0.183005	0.147445	0.0306228	0.342112	0.100431	0.145582	0.0430495	0.0805542	0.133997	0.164355	0.449096	0.776055	0.301525	0.654236	0.556504	0.594239
YBL078C	ATG8	1799	0.247163	0.291305	0.0788236	0.215735	0.0961146	0.127823	0.163445	0.187985	0.158268	0.0564293	0.16286	0.394775	0.290163	0.0839497	0.0186428	0.459665	0.17785	0.00202957	0.147583
YER175C	TMT1	1800	0.0792893	0.168833	0.124986	0.224532	0.12532	0.193853	0.0400324	0.0546954	0.152632	0.0368772	0.0555431	0.0457943	0.161137	0.111414	0.38998	0.0951965	0.357421	0.306638	0.183052
YNL027W	CRZ1	1801	0.178696	0.0773476	0.14676	0.252163	0.0837827	0.0539698	0.0608015	0.116821	0.00937603	0.245856	0.114219	0.229776	0.14638	0.207553	0.334694	0.146059	0.141736	0.221133	0.353423
YKR018C	YKR018C	1802	0.13213	0.107243	0.164535	0.0941515	0.0800185	0.0544565	0.0552267	0.193481	0.0868915	0.225049	0.0806441	0.223515	0.115648	0.170176	0.155556	0.159161	0.253898	0.20399	0.415749
YIL026C	IRR1	1803	0.163384	0.0687155	0.178184	0.201695	0.0793403	0.0741879	0.017154	0.119448	0.107717	0.228025	0.192904	0.233344	0.224676	0.196523	0.239246	0.234533	0.144826	0.167413	0.455578
YBL045C	COR1	1804	0.23039	0.0765417	0.0666636	0.159881	0.110722	0.0968119	0.109601	0.247089	0.218144	0.149332	0.134124	0.0747537	0.257783	0.0662845	0.0411831	0.0394237	0.217197	0.00502559	0.0045906
YOR160W	MTR10	1805	0.196438	0.0380504	0.142491	0.145968	0.0339017	0.0762665	0.156159	0.0910648	0.141597	0.270501	0.179695	0.110581	0.161371	0.164968	0.232342	0.30388	0.346578	0.241534	0.448024
YJR050W	ISY1	1806	0.250546	0.124269	0.191072	0.247901	0.189374	0.0696606	0.242308	0.209314	0.235126	0.100684	0.218783	0.187206	0.0565963	0.10208	0.333896	0.321029	0.373176	0.341536	0.294564
YJL197W	UBP12	1807	0.179296	0.050728	0.141768	0.172349	0.0902836	0.0447489	0.00764789	0.26907	0.163342	0.214826	0.188546	0.157091	0.0783486	0.223946	0.319654	0.375364	0.317976	0.306198	0.498745
YGR208W	SER2	1808	0.196391	0.114925	0.240545	0.276089	0.0434944	0.0684251	0.103872	0.0081315	0.0588315	0.206444	0.123436	0.101144	0.216071	0.195725	0.195098	0.203415	0.454792	0.416565	0.566455
YCL057W	PRD1	1809	0.113289	0.117262	0.148793	0.132741	0.039212	0.067477	0.0348563	0.180737	0.176026	0.152416	0.187916	0.211881	0.156671	0.162906	0.0987269	0.1236	0.121288	0.0867124	0.314065
YKL130C	SHE2	1810	0.292336	0.0337398	0.177019	0.185802	0.0803825	0.114494	0.0625218	0.190651	0.0767067	0.146876	0.22352	0.163439	0.327124	0.403641	0.616539	0.350925	0.623133	0.493293	0.757779
YER100W	UBC6	1811	0.198914	0.0503566	0.190587	0.20762	0.0757976	0.072684	0.10891	0.0946699	0.0245306	0.136572	0.0521547	0.0526534	0.35738	0.182679	0.326746	0.0910716	0.458515	0.277266	0.638316
YER035W	EDC2	1812	0.328743	0.188109	0.260655	0.283524	0.0891753	0.254289	0.048032	0.058219	0.0966736	0.202737	0.178674	0.171669	0.496686	0.231662	0.123448	0.0822725	0.260735	0.261051	0.0736902
YGR038W	ORM1	1813	0.19697	0.0571969	0.17383	0.181714	0.156313	0.115773	0.0473714	0.220308	0.149046	0.0900725	0.127988	0.154254	0.46418	0.0613202	0.255932	0.271662	0.515205	0.380031	0.375051
YNL090W	RHO2	1814	0.180205	0.142693	0.147712	0.195186	0.0758439	0.0182973	0.00963745	0.232041	0.171577	0.0136678	0.128343	0.0987967	0.311643	0.257451	0.131641	0.286854	0.272368	0.439108	0.451507
YPR104C	FHL1	1815	0.158976	0.0954431	0.179998	0.19395	0.16459	0.0843951	0.127502	0.290837	0.0598613	0.0775465	0.127198	0.0892557	0.16868	0.160778	0.321931	0.194638	0.164765	0.194006	0.377631
YLR186W	EMG1	1816	0.171456	0.0413384	0.0879293	0.275462	0.0888267	0.0593212	0.00556956	0.0969374	0.136772	0.155506	0.104165	0.0297502	0.107556	0.455268	0.627851	0.286948	0.296394	0.411002	0.531563
YMR300C	ADE4	1817	0.174039	0.0785308	0.154212	0.200007	0.0347874	0.0423689	0.00572993	0.350899	0.167652	0.217535	0.105285	0.142762	0.196321	0.325468	0.498895	0.344446	0.311701	0.231189	0.53689
YHR073W	OSH3	1818	0.128967	0.0954029	0.0758372	0.176693	0.0330329	0.0982481	0.0228854	0.0901355	0.0943451	0.110816	0.125872	0.125489	0.0421498	0.170686	0.218124	0.194145	0.245205	0.155183	0.358886
YBR155W	CNS1	1819	0.241925	0.199742	0.409653	0.275698	0.170559	0.122133	0.34963	0.0260032	0.0764341	0.106395	0.0685961	0.111164	0.0100403	0.263996	0.654964	0.366183	0.35346	0.373059	0.72054
YOL133W	HRT1	1820	0.0943449	0.099568	0.257832	0.21637	0.142247	0.0576444	0.240061	0.525505	0.208306	0.0815459	0.293433	0.107758	0.230971	0.164533	0.0311543	0.050525	0.0953662	0.182786	0.330923
YFL007W	BLM10	1821	0.171756	0.0557815	0.0935615	0.208228	0.0386585	0.059003	0.00716492	0.159356	0.181698	0.172776	0.145845	0.160336	0.179636	0.201165	0.352968	0.30485	0.339061	0.205845	0.47336
YGL040C	HEM2	1822	0.156883	0.155616	0.15012	0.287063	0.0488732	0.0921081	0.122605	0.21626	0.113833	0.255946	0.0998566	0.14029	0.131287	0.294676	0.401502	0.259667	0.32784	0.313179	0.742198
YPR020W	ATP20	1823	0.0156387	0.169339	0.154271	0.251412	0.020041	0.0548618	0.0282139	0.25035	0.229834	0.135798	0.0713253	0.215034	0.166882	0.483279	0.0899628	0.374804	0.682986	0.612454	0.35012
YOR091W	TMA46	1824	0.241667	0.139123	0.267943	0.25574	0.191299	0.110718	0.266596	0.141003	0.259307	0.0384687	0.0189264	0.0265371	0.153382	0.172591	0.161147	0.158595	0.149372	0.305003	0.428804
YOR108W	LEU9	1825	0.184356	0.0609281	0.0389783	0.077403	0.0788308	0.145249	0.0505527	0.0498936	0.145094	0.10604	0.0997334	0.122663	0.169404	0.272708	0.101227	0.137099	0.0597297	0.218101	0.270088
YBR212W	NGR1	1826	0.121833	0.0660452	0.0835768	0.249413	0.063683	0.0763641	0.034605	0.199087	0.184968	0.163628	0.146817	0.164082	0.0485034	0.147482	0.190159	0.018294	0.018449	0.042339	0.202489
YOR217W	RFC1	1827	0.146333	0.0436727	0.0818078	0.129801	0.0414649	0.0932896	0.0195958	0.234832	0.13069	0.193756	0.142619	0.199675	0.186669	0.222475	0.25808	0.337307	0.11149	0.170772	0.418311
YER146W	LSM5	1828	0.129127	0.287481	0.272006	0.320052	0.115683	0.129758	0.118928	0.344001	0.0787223	0.124928	0.173535	0.17842	0.346218	0.331782	0.421118	0.554585	0.302951	0.370272	0.685757
YPL057C	SUR1	1829	0.246042	0.126282	0.0436538	0.227213	0.0506129	0.219793	0.0428461	0.209314	0.0974681	0.273495	0.183509	0.179608	0.0386147	0.255945	0.281599	0.220014	0.0962782	0.419482	0.287588
YAL059W	ECM1	1830	0.203902	0.0676679	0.211676	0.235835	0.300897	0.126879	0.27835	0.292124	0.259663	0.0990554	0.135131	0.0873837	0.237703	0.604596	0.821452	0.669039	0.751628	0.546843	0.714518
YOR132W	VPS17	1831	0.147243	0.14407	0.206565	0.268295	0.0709131	0.0743272	0.0203618	0.222121	0.113596	0.138877	0.1895	0.214346	0.233251	0.0339646	0.0650985	0.0690931	0.0227561	0.0759862	0.275453
YJR010C-A	SPC1	1832	0.31791	0.145219	0.116351	0.287487	0.224685	0.0666122	0.023269	0.108525	0.209046	0.273344	0.0128541	0.184838	0.0573848	0.67233	0.339039	0.76652	0.814973	0.641034	0.895363
YDL056W	MBP1	1833	0.136185	0.0311674	0.168978	0.229216	0.0615129	0.0526618	0.150464	0.250519	0.0146869	0.208509	0.134424	0.0586267	0.15783	0.191136	0.163271	0.160685	0.0078175	0.17692	0.429737
YGR252W	GCN5	1834	0.178717	0.149345	0.193796	0.213259	0.109754	0.021731	0.0508723	0.095431	0.120557	0.170203	0.124017	0.166469	0.204448	0.332606	0.314605	0.263621	0.292006	0.242463	0.637644
YPL242C	IQG1	1835	0.132857	0.0129975	0.106479	0.140661	0.0431187	0.0360253	0.0625768	0.232291	0.0840904	0.148979	0.149992	0.118617	0.215132	0.191633	0.409652	0.315469	0.322539	0.158956	0.58701
YJR011C	YJR011C	1836	0.117248	0.31462	0.142115	0.277737	0.0680382	0.0347319	0.062218	0.213231	0.265776	0.238454	0.0741546	0.0991523	0.153668	0.162482	0.594748	0.511549	0.791372	0.431655	0.540807
YKL128C	PMU1	1837	0.0981182	0.067751	0.0610584	0.227929	0.0874524	0.089586	0.0186575	0.140821	0.256829	0.120163	0.153549	0.118629	0.17948	0.185213	0.0912742	0.281083	0.286249	0.414418	0.406559
YCR067C	SED4	1838	0.148379	0.113344	0.146027	0.192558	0.0309257	0.0944784	0.0922807	0.218229	0.148018	0.212881	0.204238	0.22307	0.171013	0.205232	0.261236	0.220234	0.245127	0.205148	0.444427
YLR429W	CRN1	1839	0.173888	0.0845887	0.101153	0.137941	0.0336493	0.0916875	0.0411292	0.145717	0.149578	0.078488	0.0557799	0.0892668	0.0738326	0.214821	0.110434	0.0578059	0.142724	0.126112	0.301736
YJL033W	HCA4	1840	0.18715	0.163782	0.271634	0.195084	0.204715	0.123172	0.273654	0.170789	0.180337	0.0494331	0.153729	0.0928718	0.0821405	0.421561	0.928249	0.464432	0.588295	0.504966	0.724046
YFR051C	RET2	1841	0.140795	0.142834	0.195317	0.173696	0.0343718	0.0872054	0.0812594	0.121461	0.188784	0.212047	0.191569	0.101377	0.176381	0.17213	0.157689	0.0124146	0.131432	0.129737	0.223125
YJL198W	PHO90	1842	0.0815175	0.0966713	0.230756	0.205363	0.0959838	0.0244168	0.098057	0.128532	0.136966	0.140806	0.173862	0.112836	0.0217925	0.304185	0.700749	0.265606	0.447863	0.324686	0.565492
YEL053C	MAK10	1843	0.07954	0.0820856	0.130792	0.121953	0.0787039	0.162026	0.0502807	0.104239	0.093697	0.0892507	0.0918245	0.154949	0.0378909	0.396206	0.481632	0.477964	0.575765	0.365492	0.606275
YBL032W	HEK2	1844	0.155048	0.224642	0.271773	0.311455	0.0672381	0.0211303	0.106046	0.13594	0.0973212	0.105903	0.157667	0.0533802	0.238389	0.0777943	0.0973691	0.316367	0.0915295	0.112714	0.35149
YLL001W	DNM1	1845	0.152901	0.0651621	0.145151	0.231752	0.0801485	0.0279965	0.0207026	0.0816881	0.0614328	0.22378	0.094226	0.14134	0.252234	0.169525	0.198816	0.171223	0.375439	0.18147	0.292073
YIL125W	KGD1	1846	0.16642	0.0122422	0.123615	0.123753	0.0458057	0.0771181	0.0475316	0.244119	0.111197	0.219969	0.130645	0.18899	0.150577	0.0951757	0.108416	0.123671	0.0385329	0.0114834	0.212156
YIL090W	ICE2	1847	0.111681	0.107723	0.100742	0.148378	0.0335942	0.0769413	0.0561214	0.298451	0.13155	0.148787	0.058024	0.146634	0.137981	0.309568	0.520529	0.403721	0.334959	0.406116	0.573105
YKR072C	SIS2	1848	0.180197	0.104045	0.249786	0.181777	0.255399	0.0295063	0.321501	0.0920227	0.132769	0.0823611	0.157292	0.0977708	0.143827	0.175098	0.230245	0.176511	0.0642225	0.0409604	0.271732
YDR485C	VPS72	1849	0.235813	0.126071	0.218991	0.149301	0.0942962	0.0395234	0.1709	0.167929	0.179013	0.229007	0.185032	0.161391	0.0726666	0.263134	0.195098	0.2499	0.0150694	0.197579	0.327539
YDR494W	RSM28	1850	0.226863	0.0901458	0.11921	0.138169	0.123913	0.0282976	0.0405709	0.220308	0.209775	0.133149	0.0658815	0.0744901	0.316613	0.284786	0.29808	0.222515	0.17785	0.182786	0.293804
YOR086C	TCB1	1851	0.140939	0.0714022	0.0753063	0.175059	0.0258741	0.0808887	0.0906172	0.288699	0.128851	0.181093	0.0875793	0.26285	0.284235	0.0820246	0.0857904	0.164066	0.0310758	0.0334601	0.16463
YPR118W	MRI1	1852	0.128476	0.10117	0.101523	0.206409	0.117905	0.123908	0.0194161	0.177035	0.162335	0.160232	0.134653	0.113725	0.233104	0.409677	0.394533	0.442294	0.410487	0.544809	0.738315
YPR088C	SRP54	1853	0.166416	0.0315659	0.189969	0.152308	0.0175291	0.0856462	0.0825434	0.167929	0.136165	0.0552309	0.112435	0.103767	0.265165	0.284192	0.244401	0.289312	0.39703	0.216151	0.539033
YDR181C	SAS4	1854	0.195481	0.0517091	0.187482	0.205649	0.0927788	0.0407748	0.0591156	0.0754126	0.105285	0.20489	0.0885339	0.118285	0.191032	0.270085	0.230544	0.251868	0.17785	0.236574	0.380599
YJR132W	NMD5	1855	0.111975	0.0357428	0.056588	0.135331	0.04716	0.0678523	0.0977097	0.117348	0.125891	0.0655023	0.124995	0.0962227	0.240536	0.313247	0.41999	0.447996	0.427923	0.330207	0.640093
YAL017W	PSK1	1856	0.161915	0.0163658	0.143829	0.174652	0.105012	0.066016	0.0995347	0.26907	0.214071	0.234342	0.150302	0.248253	0.325832	0.00550678	0.150276	0.101827	0.0546036	0.0335466	0.181037
YGL172W	NUP49	1857	0.135007	0.0876556	0.0946186	0.24258	0.0346793	0.0652338	0.100808	0.243973	0.160614	0.111009	0.168774	0.038728	0.16333	0.291996	0.338364	0.0811019	0.126603	0.183566	0.503152
YPR069C	SPE3	1858	0.159428	0.0719845	0.110522	0.157815	0.0885562	0.134233	0.00547007	0.010495	0.0871031	0.246904	0.113433	0.0967477	0.289756	0.424228	0.511881	0.396711	0.339932	0.296154	0.577228
YPL081W	RPS9A	1859	0.143194	0.0202615	0.0343488	0.111854	0.0942788	0.0833649	0.0443529	0.324534	0.13074	0.0474851	0.0306579	0.0195507	0.0220258	0.421641	0.474389	0.410915	0.449389	0.440118	0.544534
YMR261C	TPS3	1860	0.100165	0.043829	0.143638	0.161238	0.157681	0.0284946	0.108345	0.153427	0.0319621	0.224139	0.169942	0.216265	0.137012	0.0157768	0.0429933	0.10941	0.103672	0.0827347	0.15889
YLR414C	PUN1	1861	0.169765	0.121313	0.0651178	0.167029	0.080369	0.0833152	0.00690748	0.0542673	0.0870786	0.290222	0.0398338	0.264483	0.2865	0.263785	0.368617	0.378327	0.268274	0.465691	0.24211
YNL147W	LSM7	1862	0.257334	0.186506	0.198107	0.426962	0.0435408	0.0178641	0.0369933	0.326203	0.221564	0.1321	0.311125	0.0734661	0.279798	0.185539	0.910955	0.294869	0.397878	0.24396	0.649314
YHL027W	RIM101	1863	0.0853974	0.0435326	0.105395	0.0913084	0.119624	0.0407586	0.00163902	0.0735073	0.0590522	0.0868301	0.0744752	0.0585755	0.0649022	0.128866	0.0981965	0.014902	0.105637	0.0346855	0.291966
YER172C	BRR2	1864	0.218508	0.0562628	0.109545	0.151387	0.0325964	0.0617943	0.116041	0.109376	0.0498651	0.104632	0.158002	0.0618512	0.172306	0.271851	0.435424	0.361907	0.424146	0.273008	0.556114
YLR328W	NMA1	1865	0.183356	0.0767404	0.117781	0.186927	0.0509774	0.12345	0.0106875	0.251775	0.0913557	0.151628	0.113871	0.0237547	0.169752	0.20321	0.293224	0.246353	0.157343	0.27743	0.513693
YNL050C	YNL050C	1866	0.25436	0.132962	0.283699	0.239538	0.132681	0.068472	0.0321027	0.22483	0.11334	0.0947497	0.0999287	0.112022	0.119749	0.440962	0.548475	0.322736	0.449389	0.394931	0.519236
YNL051W	COG5	1867	0.133767	0.0562278	0.237045	0.192167	0.132303	0.0961583	0.00890096	0.171615	0.111884	0.27069	0.157915	0.118413	0.189311	0.263307	0.230186	0.270766	0.249787	0.257349	0.371127
YNL288W	CAF40	1868	0.179662	0.00663387	0.0134574	0.188581	0.134003	0.148998	0.0795701	0.0979133	0.106135	0.154519	0.185829	0.192573	0.135173	0.168674	0.134417	0.1603	0.289105	0.212291	0.272501
YNL182C	IPI3	1869	0.130562	0.137112	0.276882	0.170956	0.175135	0.0668376	0.259548	0.0848276	0.102779	0.159641	0.224186	0.0912917	0.125779	0.421498	0.746211	0.499952	0.680081	0.490373	0.713798
YPL234C	VMA11	1870	0.0349418	0.0775144	0.0573545	0.134238	0.156666	0.192553	0.0109559	0.194628	0.163147	0.00580671	0.262176	0.104015	0.197485	0.465758	0.649262	0.676121	0.544857	0.595038	0.599079
YOR273C	TPO4	1871	0.0637838	0.2029	0.587357	0.478436	0.123139	0.165065	0.343593	0.167633	0.0868176	0.183986	0.32173	0.368811	0.418923	0.351471	0.387435	0.188348	0.218436	0.509569	0.421768
YBL097W	BRN1	1872	0.185539	0.084459	0.0892424	0.182533	0.155795	0.0600023	0.146456	0.170745	0.0496434	0.0781611	0.108486	0.154116	0.301101	0.182297	0.297798	0.353852	0.209089	0.163852	0.393326
YNL238W	KEX2	1873	0.12334	0.124142	0.0656711	0.124955	0.06646	0.0602709	0.00682721	0.125483	0.214336	0.046298	0.0889521	0.159842	0.157069	0.170338	0.269379	0.125597	0.202026	0.133782	0.416927
YDR098C	GRX3	1874	0.332429	0.117661	0.106095	0.280932	0.108951	0.065808	0.0659674	0.251553	0.0955492	0.0872021	0.0647517	0.0395423	0.119648	0.357572	0.363687	0.358055	0.281263	0.458469	0.755611
YLR096W	KIN2	1875	0.133144	0.0906296	0.148757	0.202763	0.0418427	0.0522996	0.116435	0.181937	0.103576	0.0935931	0.215013	0.156323	0.158251	0.195034	0.252771	0.279142	0.400665	0.235821	0.484573
YOR119C	RIO1	1876	0.085903	0.143156	0.206769	0.139696	0.094127	0.0877554	0.149553	0.33463	0.192095	0.0694741	0.172898	0.127204	0.0475937	0.259754	0.633571	0.433608	0.596355	0.335372	0.614555
YNL199C	GCR2	1877	0.11963	0.137974	0.112626	0.191306	0.118151	0.0230985	0.192267	0.00482661	0.124636	0.126753	0.255822	0.113677	0.0473635	0.192077	0.29793	0.283481	0.51838	0.20256	0.436315
YJR062C	NTA1	1878	0.137485	0.0708178	0.143936	0.120477	0.0668308	0.0172463	0.0217113	0.228584	0.0322113	0.159508	0.0595805	0.183198	0.0952498	0.168414	0.108846	0.349664	0.325394	0.166324	0.40846
YOR211C	MGM1	1879	0.0985225	0.0436237	0.115857	0.176716	0.0405741	0.0213136	0.0271082	0.185832	0.0780779	0.213722	0.154882	0.20304	0.095886	0.146272	0.180265	0.185951	0.14983	0.0637002	0.266443
YFR041C	ERJ5	1880	0.0111859	0.0914374	0.0682611	0.289757	0.0333674	0.130703	0.066352	0.147787	0.0852887	0.139678	0.0420959	0.196959	0.410799	0.306403	0.36087	0.273187	0.427271	0.306357	0.477627
YFR031C	SMC2	1881	0.186833	0.0673949	0.154011	0.201246	0.118182	0.126207	0.0705914	0.277741	0.137429	0.190086	0.179155	0.17966	0.192511	0.260637	0.312944	0.30069	0.393625	0.172107	0.418394
YKR064W	OAF3	1882	0.0959596	0.0798896	0.0975582	0.158042	0.050886	0.0922059	0.153088	0.285145	0.0430435	0.133083	0.148869	0.106256	0.133941	0.142641	0.277858	0.239626	0.211693	0.199305	0.340223
YOR171C	LCB4	1883	0.142664	0.0786758	0.079834	0.183812	0.0734105	0.11727	0.0907953	0.126011	0.159397	0.201701	0.119488	0.172271	0.168112	0.118532	0.331476	0.214972	0.221937	0.195505	0.418776
YIL047C	SYG1	1884	0.0675178	0.10463	0.0551619	0.14425	0.0493656	0.0678295	0.0274613	0.224299	0.135841	0.0275834	0.149431	0.098405	0.0827261	0.253806	0.279597	0.192535	0.358006	0.283638	0.50555
YPL266W	DIM1	1885	0.218642	0.230025	0.209418	0.16032	0.0955134	0.135778	0.25199	0.0454573	0.0990418	0.133222	0.0931641	0.0604625	0.148599	0.475476	0.749173	0.485307	0.677992	0.299231	0.643169
YEL036C	ANP1	1886	0.144854	0.178978	0.221941	0.271617	0.111586	0.0726673	0.159281	0.0500431	0.332829	0.114486	0.198163	0.10951	0.0919148	0.0405627	0.142473	0.0506693	0.0343273	0.190641	0.358285
YMR071C	TVP18	1887	0.135884	0.146702	0.141326	0.208517	0.0650257	0.132467	0.0314506	0.256065	0.23536	0.182577	0.163867	0.141761	0.348441	0.465365	0.341572	0.4958	0.277797	0.477757	0.546862
YKL008C	LAC1	1888	0.054771	0.129208	0.0731446	0.184898	0.138615	0.0880084	0.0231134	0.0739684	0.0498608	0.0921227	0.134912	0.150756	0.123575	0.265278	0.555003	0.378845	0.480516	0.523923	0.52255
YIL147C	SLN1	1889	0.145503	0.0218056	0.100965	0.192595	0.00616319	0.0848203	0.0783537	0.254754	0.179059	0.176234	0.128207	0.146259	0.161711	0.220461	0.356162	0.314712	0.28901	0.260262	0.502551
YLR095C	IOC2	1890	0.157542	0.0776436	0.105377	0.14166	0.0705244	0.0629241	0.0701641	0.12451	0.13681	0.0473078	0.142626	0.191709	0.208856	0.189816	0.136527	0.136939	0.0967395	0.157545	0.305379
YPL163C	SVS1	1891	0.189403	0.315079	0.123673	0.362452	0.214819	0.114609	0.00711947	0.326432	0.210731	0.314901	0.101264	0.152479	0.343511	0.136437	0.000589108	0.0196253	0.244229	0.0364571	0.109399
YLR367W	RPS22B	1892	0.13275	0.1307	0.0423318	0.14952	0.0843192	0.0953592	0.102429	0.0793594	0.112596	0.180317	0.0739925	0.0471937	0.133327	0.26606	0.570517	0.362177	0.428888	0.464955	0.518638
YNL330C	RPD3	1893	0.132492	0.0989192	0.207086	0.179188	0.0866007	0.060733	0.0921419	0.0364622	0.22895	0.163413	0.0875531	0.178208	0.295408	0.270085	0.306688	0.269067	0.328988	0.172194	0.405222
YML071C	COG8	1894	0.260403	0.0422597	0.182221	0.261356	0.105745	0.103191	0.229736	0.289978	0.279983	0.222849	0.220279	0.165208	0.27706	0.147649	0.465108	0.254168	0.347532	0.0752389	0.552606
YBR234C	ARC40	1895	0.182866	0.0810953	0.192139	0.188414	0.188014	0.114803	0.0759552	0.235003	0.0603372	0.204616	0.202121	0.204815	0.0375817	0.198613	0.117033	0.214308	0.297228	0.139727	0.256055
YHR181W	SVP26	1896	0.142638	0.130447	0.0785537	0.18841	0.156571	0.0727569	0.0586654	0.0676583	0.196953	0.354026	0.0449318	0.0257492	0.275869	0.495644	0.510313	0.179166	0.50277	0.533056	0.763351
YMR296C	LCB1	1897	0.140242	0.0639697	0.104299	0.218623	0.0789028	0.101798	0.173262	0.0862344	0.214045	0.10871	0.119139	0.140596	0.155134	0.198584	0.283623	0.0349476	0.11287	0.219542	0.402199
YLR073C	RFU1	1898	0.231133	0.0959483	0.310758	0.0781067	0.120093	0.101108	0.174216	0.42413	0.221373	0.0710226	0.136775	0.125657	0.0364983	0.366924	0.729437	0.221525	0.345695	0.535547	0.378031
YPR034W	ARP7	1899	0.173265	0.125245	0.225089	0.194053	0.0472425	0.0879564	0.034291	0.0601467	0.221698	0.101438	0.149636	0.0976026	0.21316	0.263771	0.102583	0.13542	0.170069	0.244791	0.297195
YJL011C	RPC17	1900	0.0892863	0.220173	0.360453	0.231238	0.153835	0.101618	0.147609	0.320459	0.168897	0.123488	0.25029	0.15467	0.180832	0.447165	0.372852	0.410783	0.322446	0.425503	0.514012
YAR007C	RFA1	1901	0.143998	0.150502	0.181543	0.193497	0.111424	0.0595124	0.158253	0.381911	0.166797	0.179215	0.192545	0.17577	0.344894	0.257116	0.166472	0.273753	0.0775309	0.202421	0.480461
YNL062C	GCD10	1902	0.104788	0.0969407	0.275897	0.189113	0.143705	0.111416	0.245322	0.021644	0.103178	0.0356776	0.106269	0.0714681	0.244074	0.356921	0.843989	0.492001	0.451403	0.449336	0.802928
YGL129C	RSM23	1903	0.135347	0.0397166	0.0673493	0.190886	0.0435632	0.111822	0.187443	0.145161	0.113952	0.251908	0.141951	0.135119	0.0374689	0.18835	0.308946	0.261937	0.119551	0.284476	0.496776
YGL111W	NSA1	1904	0.240858	0.138856	0.151177	0.159341	0.130693	0.0733412	0.113843	0.0362038	0.110661	0.0288505	0.110846	0.158579	0.207877	0.323606	0.744122	0.378845	0.47874	0.425942	0.585677
YLR278C	YLR278C	1905	0.0503047	0.0150031	0.114467	0.178619	0.142351	0.00715146	0.0101219	0.378106	0.108721	0.113209	0.146751	0.200741	0.123083	0.223827	0.295593	0.187484	0.365145	0.202963	0.495441
YMR304W	UBP15	1906	0.143126	0.0247371	0.127705	0.182249	0.0666022	0.0357789	0.06856	0.261964	0.0759849	0.267475	0.152858	0.231914	0.183557	0.0619101	0.0966874	0.16286	0.00703755	0.0157587	0.306719
YGR063C	SPT4	1907	0.415216	0.249506	0.0522123	0.232676	0.164717	0.156402	0.0863623	0.132119	0.135187	0.0513711	0.0403735	0.161854	0.13067	0.404762	0.434097	0.538963	0.463312	0.507694	0.290594
YDR216W	ADR1	1908	0.16214	0.174369	0.194454	0.2712	0.0183161	0.12284	0.121172	0.253741	0.166901	0.423393	0.251507	0.183518	0.133125	0.217321	0.362034	0.466157	0.340169	0.230795	0.472008
YGL178W	MPT5	1909	0.197466	0.0909692	0.109909	0.186022	0.0888158	0.0360098	0.0987818	0.218439	0.131519	0.180346	0.223482	0.0923052	0.0620559	0.17648	0.396012	0.308323	0.269868	0.259815	0.534185
YHR165C	PRP8	1910	0.168244	0.02609	0.0552497	0.163805	0.0775031	0.0505044	0.045169	0.26907	0.112342	0.131427	0.123528	0.100592	0.0700277	0.161848	0.266165	0.282434	0.251442	0.148796	0.512151
YLR138W	NHA1	1911	0.179849	0.0629069	0.209169	0.143595	0.0456147	0.0420476	0.0874707	0.0154827	0.0920682	0.190616	0.18267	0.199233	0.102215	0.195906	0.291648	0.35387	0.405062	0.191678	0.385944
YOL032W	OPI10	1912	0.254989	0.161537	0.304996	0.32757	0.0639342	0.192189	0.137288	0.181887	0.257834	0.150983	0.058699	0.394536	0.239691	0.023654	0.148419	0.38266	0.481726	0.204648	0.154814
YMR117C	SPC24	1913	0.113584	0.0894365	0.180046	0.139272	0.175073	0.089534	0.185348	0.0945416	0.246256	0.189917	0.0698771	0.314247	0.238064	0.0229473	0.32219	0.145713	0.161828	0.0977381	0.259325
YBL040C	ERD2	1914	0.219809	0.135961	0.225952	0.256627	0.182204	0.0374785	0.0796429	0.184318	0.0747888	0.0656984	0.0796809	0.0308646	0.418991	0.308404	0.482308	0.492187	0.491604	0.489134	0.582356
YER111C	SWI4	1915	0.174206	0.0431894	0.233834	0.326294	0.111945	0.0396336	0.175718	0.352741	0.165707	0.285354	0.230977	0.148289	0.173342	0.206437	0.339192	0.242709	0.0962454	0.121815	0.35034
YLR454W	FMP27	1916	0.150163	0.0530188	0.155601	0.233863	0.0800331	0.0462747	0.00915774	0.229241	0.0425569	0.244536	0.202024	0.109738	0.159152	0.0134499	0.0587343	0.213653	0.00747237	0.0146869	0.208925
YBR073W	RDH54	1917	0.127987	0.144059	0.127804	0.122051	0.040885	0.0756699	0.0131992	0.154731	0.235889	0.1871	0.167576	0.152104	0.235026	0.2445	0.395015	0.307993	0.238173	0.254551	0.466298
YHR118C	ORC6	1918	0.183712	0.176646	0.28701	0.226547	0.134099	0.0482049	0.204715	0.042268	0.141329	0.163424	0.104721	0.119003	0.288471	0.229295	0.225833	0.320915	0.210124	0.352242	0.411163
YLR120C	YPS1	1919	0.109912	0.0401597	0.0821661	0.214832	0.0559664	0.0370821	0.024155	0.0771332	0.0552607	0.179044	0.218093	0.108757	0.144507	0.193593	0.079537	0.176707	0.231282	0.127908	0.335158
YOL013C	HRD1	1920	0.157971	0.114512	0.0934891	0.261783	0.0525916	0.0521315	0.0369933	0.145064	0.141471	0.320651	0.256123	0.201018	0.237364	0.0745973	0.127299	0.209622	0.325942	0.254993	0.235352
YMR061W	RNA14	1921	0.123051	0.0487392	0.0807874	0.0985424	0.0354077	0.0194799	0.0611593	0.209095	0.0844654	0.108363	0.118619	0.113229	0.121451	0.183689	0.325606	0.180257	0.292999	0.236479	0.461328
YHR146W	CRP1	1922	0.173768	0.110045	0.201717	0.248227	0.111992	0.0360674	0.206052	0.0706781	0.0581577	0.0348818	0.195258	0.144639	0.125806	0.344251	0.147031	0.338029	0.146365	0.332198	0.342775
YBL107C	MIX23	1923	0.118481	0.149891	0.332914	0.251917	0.134765	0.0504385	0.0232118	0.211824	0.250974	0.0805784	0.053363	0.141741	0.278326	0.458847	0.24113	0.44379	0.399884	0.360285	0.581695
YDR159W	SAC3	1924	0.151797	0.0476156	0.155791	0.202394	0.101468	0.041281	0.057226	0.086956	0.13443	0.145274	0.164237	0.0890993	0.134074	0.2081	0.298321	0.275798	0.249764	0.208995	0.453242
YCR065W	HCM1	1925	0.122191	0.00989548	0.0499239	0.0624675	0.0618388	0.0329758	0.0243946	0.236648	0.14689	0.104834	0.101164	0.158242	0.194339	0.24465	0.130391	0.140127	0.028692	0.127304	0.263917
YGR147C	NAT2	1926	0.170193	0.133927	0.087413	0.134604	0.0736283	0.0764386	0.154508	0.0249731	0.148257	0.106343	0.0611154	0.04025	0.0625001	0.369985	0.381973	0.364863	0.356465	0.426728	0.333371
YOR150W	MRPL23	1927	0.0907801	0.114287	0.238782	0.317235	0.0934556	0.123642	0.0810345	0.0024337	0.123417	0.185417	0.103034	0.194718	0.223162	0.399743	0.434097	0.0822725	0.273014	0.25053	0.24211
YGL041W-A	YGL041W-A	1928	0.0606348	0.234504	0.23027	0.181679	0.107912	0.0872267	0.0227143	0.382747	0.139248	0.0702959	0.0708745	0.127344	0.124785	0.418562	0.134417	0.437348	0.561727	0.378679	0.246522
YMR145C	NDE1	1929	0.106804	0.132724	0.160722	0.252198	0.0755571	0.0767863	0.0158918	0.313135	0.0959448	0.2282	0.162888	0.202905	0.402011	0.138852	0.202659	0.212865	0.122706	0.128512	0.370686
YML100W	TSL1	1930	0.0810876	0.242833	0.27116	0.420765	0.219445	0.33549	0.320718	0.177971	0.0932901	0.333503	0.342457	0.475171	0.31438	0.82283	1.03783	0.835783	1.00477	0.928254	0.89675
YCR069W	CPR4	1931	0.0819219	0.142847	0.182907	0.212677	0.0136078	0.0640328	0.0406638	0.260032	0.152686	0.352465	0.0224727	0.20729	0.179282	0.0469824	0.118941	0.0573802	0.216025	0.0510183	0.290125
YPL116W	HOS3	1932	0.0984276	0.132254	0.169676	0.207622	0.0481988	0.108583	0.0312924	0.241887	0.134404	0.196336	0.149651	0.083742	0.231248	0.148701	0.0459188	0.121679	0.128623	0.18241	0.313382
YKL010C	UFD4	1933	0.123945	0.0956551	0.0579449	0.137541	0.024315	0.0704481	0.0369933	0.0602822	0.0929009	0.164792	0.0978561	0.166797	0.167023	0.160693	0.277581	0.29074	0.325884	0.164558	0.445529
YBR015C	MNN2	1934	0.113651	0.0752059	0.142596	0.146934	0.0268992	0.140772	0.00185876	0.283389	0.107428	0.137444	0.088231	0.193457	0.0512598	0.223278	0.25193	0.203628	0.284629	0.327562	0.450914
YCR107W	AAD3	1935	0.131484	0.0184202	0.0639259	0.232963	0.112718	0.0766913	0.0658197	0.237719	0.0490439	0.127683	0.126937	0.655984	0.0744721	0.245954	0.202673	0.305024	0.30147	0.189386	0.4291
YJR143C	PMT4	1936	0.110118	0.122052	0.0520305	0.126136	0.0314322	0.132096	0.00242151	0.213383	0.108246	0.150113	0.196469	0.272066	0.198588	0.195433	0.260114	0.275339	0.355417	0.255195	0.457335
YPR073C	LTP1	1937	0.15215	0.234286	0.232926	0.0962713	0.0946084	0.109228	0.145486	0.26907	0.271236	0.0873212	0.173584	0.269221	0.214584	0.294417	0.70179	0.594079	0.470124	0.141115	0.364995
YBL090W	MRP21	1938	0.157549	0.172879	0.121695	0.173428	0.0988471	0.102147	0.0369933	0.191668	0.0943416	0.0694741	0.0726993	0.0910075	0.296389	0.47644	0.232453	0.181025	0.726356	0.405623	0.294564
YMR016C	SOK2	1939	0.191321	0.130404	0.176204	0.273681	0.137238	0.161121	0.148661	0.129794	0.0277416	0.0842307	0.123069	0.203259	0.0485944	0.133718	0.00477834	0.0211805	0.141227	0.311132	0.192747
YNL111C	CYB5	1940	0.114565	0.289333	0.27374	0.156644	0.16177	0.112944	0.190512	0.3588	0.404562	0.0710226	0.179056	0.132471	0.281934	0.551129	0.750472	0.614445	0.832603	0.826637	0.674996
YGR081C	SLX9	1941	0.22205	0.146763	0.192345	0.2135	0.165663	0.105579	0.296952	0.421529	0.157524	0.0143324	0.138467	0.0281169	0.188189	0.575642	0.421118	0.330901	0.718576	0.467762	0.460939
YBR095C	RXT2	1942	0.208404	0.0198432	0.0929638	0.102004	0.11999	0.0514473	0.0113892	0.136525	0.0542297	0.138651	0.136108	0.112805	0.157832	0.228842	0.281063	0.327563	0.311994	0.171913	0.494222
YDR498C	SEC20	1943	0.197675	0.0768522	0.226286	0.145602	0.0863967	0.0902024	0.0974424	0.260996	0.153946	0.0477829	0.104341	0.199931	0.125507	0.160751	0.00161162	0.193638	0.0777382	0.1624	0.373283
YPR141C	KAR3	1944	0.1594	0.0906699	0.226348	0.182402	0.10626	0.044662	5.09e-05	0.300483	0.15393	0.163114	0.067551	0.111627	0.301537	0.192453	0.241835	0.394802	0.277559	0.253211	0.443296
YNR013C	PHO91	1945	0.0989404	0.0524317	0.142761	0.18361	0.0439897	0.0774585	0.051201	0.179364	0.0768388	0.141422	0.208318	0.142805	0.0447385	0.216716	0.241401	0.174728	0.180921	0.226706	0.546862
YML125C	PGA3	1946	0.0835479	0.197008	0.197871	0.214636	0.0445827	0.143066	0.00938241	0.12505	0.315751	0.0735347	0.0439262	0.12243	0.148514	0.410966	0.559733	0.480079	0.489987	0.600227	0.751417
YGL049C	TIF4632	1947	0.17042	0.103885	0.18206	0.242877	0.0739719	0.0622367	0.00207578	0.24891	0.206777	0.237833	0.182806	0.125868	0.0950946	0.159268	0.164563	0.162887	0.120836	0.135256	0.311372
YLR226W	BUR2	1948	0.207611	0.0915267	0.0835151	0.133006	0.0596882	0.0597669	0.331348	0.325416	0.118923	0.0238393	0.114036	0.0319622	0.152282	0.196848	0.389453	0.404179	0.410487	0.242463	0.589596
YCL001W	RER1	1949	0.155962	0.263244	0.0514329	0.210907	0.208334	0.0672962	0.11796	0.0182722	0.0686359	0.113624	0.0824179	0.226552	0.217927	0.407731	0.365571	0.434546	0.425256	0.542021	0.600462
YPL203W	TPK2	1950	0.117458	0.116415	0.0827622	0.225571	0.0601463	0.0823288	0.0755909	0.12018	0.0855747	0.243943	0.169083	0.130319	0.105272	0.0467124	0.257207	0.0456483	0.137936	0.118772	0.0661861
YHR200W	RPN10	1951	0.176943	0.0310892	0.136651	0.368599	0.0472328	0.168363	0.0909978	0.210053	0.229938	0.154809	0.0770903	0.0754738	0.221031	0.308328	0.385889	0.243902	0.119551	0.422183	0.207443
YDR481C	PHO8	1952	0.0695947	0.0778333	0.121246	0.102459	0.107535	0.148163	0.0778721	0.220698	0.108592	0.0885865	0.0688082	0.129959	0.0869557	0.489985	0.596778	0.458457	0.235067	0.507755	0.611025
YER029C	SMB1	1953	0.215083	0.149291	0.2255	0.24866	0.18366	0.0808368	0.129784	0.239316	0.180007	0.0780442	0.062477	0.0935359	0.103172	0.496264	0.166706	0.285526	0.322446	0.260373	0.482245
YGL125W	MET13	1954	0.0627863	0.00825814	0.0636344	0.127191	0.0733549	0.0520085	0.183156	0.0428408	0.145763	0.153955	0.108229	0.0272954	0.0670356	0.0867065	0.416557	0.248516	0.337587	0.239395	0.301114
YDL236W	PHO13	1955	0.105725	0.105101	0.115291	0.217947	0.117988	0.102172	0.0153533	0.122662	0.109815	0.101826	0.139492	0.118531	0.228724	0.228582	0.313576	0.464148	0.324348	0.493127	0.468459
YCL017C	NFS1	1956	0.165863	0.105139	0.032318	0.189123	0.0450114	0.134134	0.113277	0.132119	0.214956	0.197859	0.0906686	0.101749	0.134842	0.332485	0.244653	0.194485	0.222567	0.190297	0.342899
YKR074W	AIM29	1957	0.159675	0.27305	0.305873	0.301438	0.0370137	0.044414	0.0183096	0.184636	0.274139	0.124682	0.181376	0.102671	0.18328	0.275876	0.441162	0.356333	0.809737	0.375994	0.531563
YLR327C	TMA10	1958	0.415764	0.311068	0.57334	0.984788	0.224964	0.290344	0.240577	0.1764	0.305473	0.543537	0.531175	0.161235	0.574599	0.0839497	0.392232	0.0693005	0.384685	0.175553	0.603751
YDL166C	FAP7	1959	0.238635	0.228562	0.205328	0.321585	0.117784	0.0520621	0.168996	0.0505664	0.123046	0.0916821	0.0976565	0.0521025	0.234402	0.372069	0.679282	0.34853	0.776298	0.46557	0.550801
YBR023C	CHS3	1960	0.114436	0.0515111	0.0828239	0.112984	0.0726325	0.0408329	0.0312707	0.204696	0.0561072	0.18746	0.130655	0.234032	0.118633	0.286709	0.304429	0.373918	0.442615	0.274003	0.59591
YHL038C	CBP2	1961	0.0805835	0.141359	0.164172	0.233257	0.0884407	0.0955081	0.0746202	0.0936431	0.126561	0.0542523	0.0932581	0.0803418	0.108046	0.186243	0.220489	0.285628	0.131918	0.122734	0.355549
YLR373C	VID22	1962	0.094284	0.039411	0.144147	0.237164	0.0854456	0.0720506	0.10604	0.299084	0.137808	0.305034	0.237327	0.171465	0.197963	0.0703825	0.231316	0.101721	0.0631754	0.193438	0.357875
YHR029C	YHI9	1963	0.174603	0.0561312	0.131697	0.242236	0.0513089	0.109176	0.0303262	0.209714	0.0619774	0.108043	0.0805714	0.171013	0.128939	0.330524	0.240378	0.350925	0.16085	0.256987	0.215793
YHL039W	EFM1	1964	0.109457	0.130354	0.181679	0.244957	0.0411319	0.0708081	0.00283533	0.306942	0.0953253	0.00840035	0.138825	0.102258	0.190996	0.309604	0.367766	0.374924	0.507474	0.346448	0.675854
YDR093W	DNF2	1965	0.157506	0.0533942	0.0710468	0.156042	0.0293029	0.119672	0.0103151	0.055935	0.123132	0.117343	0.137952	0.185255	0.142307	0.179295	0.231795	0.303371	0.291005	0.142818	0.404481
YBL017C	PEP1	1966	0.140823	0.0592931	0.0870992	0.153573	0.0207944	0.0925585	0.0342311	0.149309	0.0592003	0.151604	0.160157	0.0864356	0.100048	0.173788	0.268547	0.272686	0.321646	0.226571	0.403729
YLR069C	MEF1	1967	0.0876287	0.0865964	0.0269381	0.0819377	0.0656059	0.0203437	0.10078	0.281707	0.188512	0.169399	0.140479	0.23557	0.194069	0.196425	0.0680465	0.227609	0.225386	0.138957	0.504778
YHR056C	RSC30	1968	0.164966	0.0176956	0.114272	0.258812	0.0904977	0.0872891	0.0740193	0.310328	0.104344	0.192342	0.175369	0.200137	0.0128426	0.153122	0.233734	0.249709	0.0894437	0.0987608	0.326445
YNL207W	RIO2	1969	0.16821	0.148198	0.0600779	0.133077	0.0209723	0.00681304	0.0895137	0.164032	0.133177	0.0534823	0.135219	0.144599	0.306195	0.477107	0.607963	0.481295	0.537715	0.496468	0.623983
YJR054W	KCH1	1970	0.141716	0.10057	0.0771578	0.119781	0.0508131	0.0698994	0.0518031	0.0501603	0.0718691	0.250097	0.161643	0.095011	0.278361	0.208049	0.285942	0.322963	0.358179	0.307735	0.525337
YML110C	COQ5	1971	0.162302	0.0865689	0.108304	0.214401	0.113462	0.163139	0.134953	0.108268	0.233009	0.165041	0.173005	0.0524823	0.298861	0.146398	0.0576439	0.290016	0.137359	0.379739	0.399052
YGR136W	LSB1	1972	0.0606774	0.126151	0.235788	0.285578	0.145964	0.0713378	0.0478344	0.0491382	0.190099	0.0907822	0.104132	0.150881	0.0885873	0.234553	0.335908	0.54044	0.208693	0.321361	0.238753
YPR191W	QCR2	1973	0.111047	0.15279	0.088388	0.0883022	0.06609	0.0331842	0.122312	0.158042	0.118254	0.146486	0.140743	0.0532457	0.270147	0.0716135	0.186422	0.0492817	0.0903885	0.0848849	0.019557
YGL073W	HSF1	1974	0.164366	0.0302473	0.229651	0.180503	0.151643	0.0358152	0.204273	0.127723	0.0683871	0.223187	0.181775	0.130002	0.0627482	0.111082	0.198983	0.131809	0.261066	0.0971421	0.31501
YPL188W	POS5	1975	0.0744169	0.0991081	0.226248	0.322778	0.081432	0.116482	0.218087	0.0726054	0.0507519	0.0768652	0.0941833	0.0985585	0.164235	0.13835	0.0723987	0.161076	0.35346	0.30388	0.447885
YGR210C	YGR210C	1976	0.222484	0.230015	0.0945016	0.384505	0.0564606	0.149869	0.0458234	0.223338	0.234776	0.0993055	0.0701882	0.145142	0.135182	0.160884	0.101753	0.200535	0.506358	0.347552	0.203436
YHR063C	PAN5	1977	0.121097	0.131351	0.12655	0.204058	0.0539879	0.0558766	0.0219225	0.158343	0.143215	0.210922	0.171765	0.138865	0.170972	0.318495	0.521593	0.373113	0.311701	0.191817	0.497997
YML032C	RAD52	1978	0.200888	0.0200492	0.153903	0.107328	0.0724727	0.0266687	0.0515589	0.107474	0.0431224	0.186662	0.0940447	0.195519	0.152972	0.232171	0.161799	0.159296	0.32646	0.182251	0.420876
YKR006C	MRPL13	1979	0.133107	0.0904	0.162025	0.195572	0.0825382	0.0392512	0.146954	0.100701	0.160585	0.233313	0.145546	0.129711	0.387788	0.24363	0.172672	0.277099	0.243734	0.378307	0.50555
YDR012W	RPL4B	1980	0.126256	0.0414214	0.160964	0.149602	0.118303	0.0506738	0.116372	0.10084	0.0819605	0.100109	0.126156	0.0654021	0.128947	0.317236	0.0882158	0.0765541	0.245149	0.343852	0.451507
YNR006W	VPS27	1981	0.15957	0.104082	0.227089	0.295196	0.139676	0.0691691	0.128088	0.11905	0.191621	0.161166	0.129864	0.0982453	0.113556	0.186096	0.00969804	0.0818068	0.21494	0.104715	0.17695
YOR230W	WTM1	1982	0.126804	0.13995	0.0796373	0.217109	0.0420218	0.114868	0.128806	0.136863	0.154677	0.297114	0.228946	0.0563224	0.306207	0.132621	0.205012	0.10447	0.0920687	0.110407	0.33898
YLR419W	YLR419W	1983	0.179005	0.0725257	0.159513	0.190616	0.133119	0.0585639	0.144087	0.157475	0.0853857	0.0993934	0.18756	0.183809	0.157816	0.30035	0.436874	0.374353	0.334467	0.257183	0.566959
YCR043C	YCR043C	1984	0.213093	0.252854	0.0826915	0.122798	0.151133	0.0572949	0.0447148	0.0945416	0.208879	0.0141638	0.15069	0.283414	0.250706	0.249099	0.412272	0.578239	0.74385	0.540112	0.642419
YJL072C	PSF2	1985	0.151974	0.07629	0.178163	0.222288	0.0337218	0.0676088	0.102342	0.164479	0.145932	0.14691	0.0780057	0.0790904	0.104169	0.321768	0.145306	0.211323	0.47874	0.290102	0.427089
YIL151C	ESL1	1986	0.0951032	0.0578364	0.103574	0.13193	0.0539184	0.0118678	0.00504614	0.182856	0.0832764	0.214821	0.0395727	0.21207	0.170059	0.182971	0.294191	0.333048	0.332765	0.253691	0.429679
YOL062C	APM4	1987	0.114046	0.109913	0.0941733	0.176737	0.0854375	0.0954238	0.0817262	0.0899547	0.186326	0.157785	0.185474	0.0828407	0.15686	0.233153	0.281063	0.292864	0.293047	0.323687	0.383137
YML081W	TDA9	1988	0.0821754	0.0913379	0.0528206	0.128468	0.0553346	0.0772158	0.0866891	0.287407	0.112034	0.0688742	0.194792	0.116465	0.166242	0.213461	0.166898	0.251106	0.202737	0.182911	0.47562
YIL063C	YRB2	1989	0.227919	0.167573	0.265877	0.281633	0.206993	0.0282126	0.174344	0.117008	0.099864	0.0766186	0.0808217	0.178886	0.08625	0.37636	0.195098	0.267809	0.0157908	0.290295	0.265845
YDR524C	AGE1	1990	0.101462	0.0429667	0.162522	0.11471	0.042978	0.0866693	0.0149023	0.399927	0.146246	0.165303	0.0644687	0.0422852	0.233997	0.29421	0.326822	0.342945	0.511966	0.281073	0.451887
YKL023W	YKL023W	1991	0.208617	0.175617	0.17813	0.297493	0.19728	0.0533361	0.284294	0.298793	0.212711	0.101058	0.0396108	0.137141	0.216818	0.138027	0.131641	0.22982	0.321506	0.11102	0.116561
YOR299W	BUD7	1992	0.0725097	0.0809592	0.0993419	0.124704	0.048816	0.108969	0.00895404	0.17772	0.113566	0.143046	0.0785509	0.187409	0.13955	0.16459	0.120056	0.167683	0.250119	0.119203	0.383416
YPR115W	RGC1	1993	0.173814	0.0234683	0.0787295	0.197727	0.0705431	0.0393368	0.0208306	0.261182	0.110756	0.185373	0.125038	0.215044	0.157142	0.0867227	0.122922	0.217384	0.0808138	0.0045521	0.259858
YDR244W	PEX5	1994	0.0974433	0.0767093	0.0705233	0.0967271	0.111635	0.0769619	0.0409774	0.0636194	0.0908114	0.127415	0.178883	0.171734	0.112089	0.179565	0.0683925	0.230427	0.391333	0.221529	0.388458
YIL008W	URM1	1995	0.240007	0.187494	0.157658	0.182543	0.164206	0.036099	0.185837	0.155581	0.0310141	0.0163105	0.130251	0.124639	0.441755	0.307727	0.483841	0.528908	0.763704	0.545378	0.648375
YGL036W	YGL036W	1996	0.17456	0.0867126	0.190061	0.206871	0.0634058	0.0717433	0.0363454	0.210175	0.104896	0.207387	0.209121	0.145192	0.170217	0.0858014	0.393153	0.186839	0.314184	0.126352	0.368317
YDR531W	CAB1	1997	0.149346	0.0679009	0.0257507	0.166698	0.0755526	0.0630721	0.0466493	0.00886766	0.100356	0.0579329	0.0674892	0.0752508	0.110225	0.236575	0.273016	0.283911	0.0474566	0.298097	0.225278
YBL005W	PDR3	1998	0.0761564	0.070116	0.0169434	0.194686	0.0621174	0.0773892	0.0467766	0.171314	0.130766	0.19232	0.131253	0.126007	0.0592837	0.208956	0.206067	0.280045	0.231536	0.168308	0.46262
YPR055W	SEC8	1999	0.140297	0.126804	0.0845248	0.174343	0.0928345	0.0367356	0.0446142	0.199325	0.104006	0.138024	0.167138	0.101275	0.180865	0.133017	0.292385	0.262335	0.325079	0.23074	0.425797
[truncated: 3,159 more rows]
