# Supplementary material for: Two roles for the yeast transcription coactivator SAGA and a set of genes redundantly regulated by TFIID and SAGA
Source: eLife. 2020 Jan 8;9:e50109. doi: 10.7554/eLife.50109 (PMC6977968; doi:10.7554/eLife.50109)
Supplement: Figure 1—figure supplement 3—source data 1. [file elife-50109-fig1-figsupp3-data1.xlsx]

## Sheet: sdS3A
	WT	Spt3_20_GC	Spt3_7_GC	Spt3_7_YPD	Taf13_GC	Taf1_YPD	Taf7_YPD	Taf13_YPD
YAL001C	4.37259	4.21017	4.19716	4.30736	4.08454	3.98342	3.95594	3.99399
YAL002W	3.51593	3.88118	3.78019	3.82187	3.48408	3.7055	3.69542	3.59811
YAL003W	6.5094	6.40082	6.32484	6.69964	6.62762	6.52639	6.43338	6.56715
YAL005C	6.04804	6.97219	6.78846	7.5906	7.12879	6.90685	6.95318	6.82926
YAL007C	5.64352	4.66221	4.6383	4.71458	4.7912	4.3414	4.39178	4.24629
YAL008W	3.64571	2.93914	2.93838	3.06212	3.09825	2.68765	2.08232	2.58004
YAL009W	3.37794	3.3598	3.21369	3.43367	3.5356	2.92514	2.83142	2.89998
YAL010C	4.07541	3.93043	3.8847	3.79411	3.60868	3.55373	3.48442	3.51608
YAL011W	4.13545	3.91938	4.05524	3.82937	3.69862	3.39902	3.47917	3.46455
YAL012W	6.60974	5.9496	6.09262	6.42328	6.16344	6.06242	6.12367	6.09853
YAL013W	5.77986	4.2294	4.43066	4.28763	4.06214	3.57723	3.56598	3.65601
YAL014C	4.21084	4.23487	4.36101	4.31852	4.09069	3.90393	3.87102	3.91227
YAL015C	3.4831	2.80515	2.73152	2.69792	2.82728	2.29254	2.25892	2.24474
YAL016W	4.02787	5.24216	5.15252	5.23927	5.28915	5.23819	5.19191	5.23691
YAL017W	4.17652	4.60691	4.34445	4.51774	4.38855	4.12427	4.09756	4.05797
YAL019W	4.3578	4.52969	4.50229	4.45734	4.32898	4.46819	4.51807	4.48213
YAL020C	4.16472	1.78563	1.53197	1.32466	1.56917	1.22131	1.15891	1.25299
YAL021C	5.28628	4.03076	4.01687	4.07605	3.90458	3.81478	3.91545	3.77009
YAL022C	3.69502	3.42293	3.45917	3.38404	3.29231	3.16308	3.04634	3.16839
YAL023C	4.8451	4.28919	4.20317	4.1864	4.32305	4.41007	4.3412	4.36521
YAL024C	3.71528	4.27633	4.09104	4.17159	3.76415	4.01438	4.08336	4.01174
YAL025C	6.20769	5.06186	5.27142	5.15214	5.11916	5.07698	5.03789	5.14395
YAL026C	3.44529	4.37787	4.17076	4.22034	4.08008	4.24014	4.21413	4.25634
YAL027W	3.16358	3.46103	3.47893	3.41449	3.14229	2.77172	2.83642	2.84314
YAL028W	3.21394	2.97903	3.03435	3.14114	2.73582	2.40079	2.48201	2.39594
YAL029C	4.38467	4.79416	4.69898	4.78448	4.66484	4.73536	4.78556	4.73671
YAL030W	3.87271	3.09159	3.23107	3.08099	3.04668	1.99888	1.81798	1.99683
YAL031C	3.83638	4.09656	4.0161	4.15015	3.82387	3.81765	3.84292	3.81265
YAL032C	4.28075	3.60789	3.84298	3.68527	3.54925	3.39865	3.26459	3.4046
YAL033W	3.73979	2.9076	3.01121	3.0969	3.244	2.52102	2.50378	2.32471
YAL034C	4.26732	3.20872	3.28809	3.26476	2.9392	3.16058	3.05965	3.20876
YAL034W-A	4.23036	3.3575	3.4962	3.45489	3.43326	2.88612	3.09986	2.962
YAL035W	5.80851	5.62655	5.63454	5.71783	5.59214	5.66392	5.74068	5.65797
YAL036C	5.23748	4.47967	4.40115	4.34676	4.50446	4.35168	4.34937	4.34378
YAL037W	1.64074	1.84758	1.9119	1.77066	1.64475	1.32123	0.948168	1.53745
YAL038W	7.64149	6.78391	6.69934	6.71293	7.0613	7.12375	7.23834	7.04311
YAL039C	4.65161	2.79801	3.20381	2.7401	3.12321	2.21381	2.03934	1.87805
YAL040C	5.21146	4.46928	4.34529	4.55782	4.13566	4.95825	4.95323	4.92878
YAL041W	4.91712	4.67846	4.67331	4.62416	4.43843	4.61706	4.6812	4.63836
YAL042W	5.00734	4.11147	3.98224	3.94308	4.02519	3.73986	3.73293	3.78537
YAL043C	4.708	4.19549	4.08656	3.94486	3.79695	3.85878	3.8801	3.82101
YAL044C	5.5557	2.9414	3.19448	3.2054	3.37061	2.49905	2.32985	2.47701
YAL044W-A	3.87617	3.14309	3.02921	3.22349	3.46974	2.63676	2.5983	2.61957
YAL046C	3.23488	2.56731	2.62004	2.71388	2.35484	1.97171	0.806014	1.8913
YAL047C	2.9264	3.47167	3.31634	3.35144	2.99007	2.9549	2.95453	2.96613
YAL048C	3.22	3.38131	3.24069	3.21258	2.84087	3.18703	3.32874	3.11145
YAL049C	3.8081	4.06418	3.86581	4.07187	3.81831	3.87049	3.95337	3.79921
YAL051W	4.009	3.86822	3.83398	3.8709	3.60915	3.9525	4.02037	3.90289
YAL053W	4.16775	4.12044	4.30249	3.95767	4.28987	4.23075	4.1065	4.20097
YAL054C	1.43062	1.28621	1.33369	1.16872	1.43278	0.700356	0.174907	0.643785
YAL055W	5.00462	2.89162	2.88648	2.90874	2.96142	2.0727	1.61016	2.1603
YAL056W	3.98169	4.40478	4.32733	4.22489	4.24096	4.22056	4.2479	4.21453
YAL058W	3.09569	2.93717	2.98011	2.83788	2.81758	2.8781	2.7292	2.80269
YAL059W	4.78569	4.24638	4.45926	4.3807	4.3581	3.99841	3.91541	4.05212
YAL060W	3.97264	2.5445	3.0323	2.972	3.41143	3.00274	2.72586	2.89305
YAL061W	3.63345	0.801258	0.940478	1.78256	2.32305	2.43926	2.24307	2.39539
YAL062W	1.73425	-0.276839	-0.0895136	-0.496233	0.598286	0.465422	0.148479	0.621578
YAL064W-B	1.76368	2.59282	1.93676	1.89875	2.10905	2.31321	2.3095	2.45675
YAL067C	0.260011	0.981011	1.14304	0.172148	0.738484	0.625415	0.628724	0.504294
YAR002C-A	4.0788	4.66054	4.63283	4.80989	4.94785	4.54473	4.41192	4.58055
YAR002W	4.56358	4.58791	4.80291	4.83562	4.49568	4.69513	4.65986	4.72629
YAR003W	3.16824	3.72339	3.80634	3.8692	3.56333	3.9718	3.86202	3.99683
YAR007C	4.61335	4.40493	4.29558	4.52523	4.5119	4.1924	4.10113	4.15663
YAR008W	4.64666	3.45108	3.54369	3.44251	3.42871	3.20263	3.24341	3.07142
YAR014C	5.00613	4.67843	4.70955	4.70625	4.43579	4.49901	4.58093	4.53351
YAR015W	3.92363	3.60787	3.8969	3.55579	3.77085	3.42161	3.27056	3.40641
YAR018C	3.87464	3.08526	3.10621	3.06037	3.09436	3.07606	2.98954	3.15043
YAR019C	3.54485	3.43365	3.25195	3.39266	2.92182	3.27472	3.25189	3.2132
YAR020C	1.91467	2.15969	1.2437	2.31304	1.84018	2.1924	2.59306	1.95509
YAR023C	2.13177	2.39345	2.34927	2.63812	2.14636	2.81886	2.65292	2.85334
YAR027W	4.27856	3.41836	3.68757	3.54801	3.66612	3.3087	3.10536	3.38974
YAR028W	2.95255	2.99702	3.1183	2.83641	3.25302	2.884	3.01401	2.87343
YAR029W	2.50042	2.6326	2.74656	1.6379	2.0154	2.72563	2.60421	2.67587
YAR031W	1.12588	0.723682	1.29455	0.149743	0.623435	-0.185487	0.352579	-0.06438
YAR033W	2.68283	1.36047	1.62751	1.46093	1.61904	1.50286	0.817743	1.6642
YAR035W	2.27993	-1.37034	-0.360785	-1.02165	0.753998	-1.40045	-1.46151	-1.38106
YAR042W	4.76698	4.15569	4.16211	4.19869	3.95412	3.82108	3.89328	3.80168
YAR050W	0.688602	0.544853	0.498572	0.674714	-0.45727	0.602468	0.695257	0.597476
YAR071W	1.5205	-0.425007	-0.159378	0.181552	1.49828	1.1314	0.714365	1.04865
YBL001C	4.6699	3.9048	4.09138	4.34401	4.38212	3.44979	3.12801	3.37621
YBL002W	6.49852	6.54282	6.53026	6.73939	6.80158	6.45353	6.53928	6.44097
YBL003C	5.45367	6.28882	6.21802	6.47494	6.77608	6.17549	6.06662	6.1335
YBL004W	3.67546	4.88306	4.74665	4.56398	4.71971	5.01117	5.06959	5.06375
YBL005W	3.93614	4.29363	4.28748	4.1625	4.27779	4.20094	4.16921	4.24375
YBL006C	5.29826	3.99713	4.08376	4.10958	4.1826	3.60607	3.36052	3.58938
YBL007C	5.06971	4.64144	4.53627	4.5777	4.48202	4.37708	4.48052	4.34185
YBL008W	3.87923	3.33207	3.36318	3.103	3.02672	3.26282	3.29273	3.26865
YBL009W	3.65476	3.94981	3.66857	3.69389	3.77093	3.84434	3.93078	3.85121
YBL010C	4.44718	3.77641	3.90867	3.9653	3.87378	3.32884	3.45325	3.3862
YBL011W	4.29655	4.07676	4.06792	4.13881	4.0008	4.02394	3.97327	4.01108
YBL013W	3.3237	2.80159	2.76566	2.65642	2.73825	2.6337	2.50997	2.62878
YBL014C	3.94458	4.09682	4.14033	3.80824	3.74642	4.0591	4.13537	4.07441
YBL015W	2.97827	2.93712	2.71695	2.67333	2.79795	2.45752	2.29152	2.3096
YBL016W	4.36329	3.07307	3.41522	4.04423	3.4778	3.97474	3.90949	4.01359
YBL017C	4.33362	4.35313	4.25424	4.32622	4.21466	4.37354	4.45919	4.37724
YBL018C	4.15043	3.82898	4.17691	3.94656	4.31124	3.58478	3.34824	3.3552
YBL019W	3.16734	2.83943	2.6345	2.91228	2.57341	2.66312	2.70774	2.61564
YBL020W	3.08237	3.75874	3.70328	3.66016	3.68542	3.94852	3.87231	3.91401
YBL021C	5.12952	3.34862	3.7252	3.48021	3.58501	3.19331	3.07561	3.20401
YBL022C	4.99288	5.09723	5.10294	5.1769	5.02466	4.86655	4.87384	4.83975
YBL023C	4.40871	4.04661	4.02609	3.986	4.02246	4.00552	4.02338	4.03124
YBL024W	4.53429	5.10466	5.0104	5.02291	5.02842	5.20989	5.25549	5.20154
YBL025W	4.5846	3.57856	3.56194	3.60666	3.40387	3.36248	3.11863	3.32707
YBL026W	4.56204	4.38283	4.88682	4.88486	4.82763	4.26967	4.00557	4.38616
YBL027W	5.03529	5.23662	5.3739	5.38129	5.34981	5.35012	5.24319	5.32142
YBL028C	5.3967	5.03081	5.75579	5.52678	5.58749	5.15086	5.09842	5.25132
YBL029C-A	4.90532	2.72586	2.67749	2.96464	3.56795	2.12815	1.81863	1.42411
YBL029W	3.10564	1.04882	1.21251	1.69092	1.682	1.21233	0.984978	1.22871
YBL030C	4.70083	4.89484	4.68305	4.95556	5.0766	5.43924	5.33235	5.32036
YBL031W	4.22449	3.84858	4.05958	3.95333	3.80681	3.34893	3.40506	3.36531
YBL032W	4.83377	4.34548	4.36572	4.47323	4.53459	4.18072	4.11238	4.17071
YBL033C	6.29974	4.09419	4.54777	4.20875	4.6218	4.18953	4.13114	4.12247
YBL034C	3.55143	4.40363	4.23301	4.30876	3.91614	4.07503	4.10851	4.03943
YBL035C	3.83603	3.77017	3.8218	3.84929	3.59078	3.93084	3.97314	3.96254
YBL036C	5.92519	4.64956	4.72721	4.70456	4.72548	4.41133	4.34484	4.3917
YBL037W	3.87161	4.18129	4.02059	4.22169	3.92963	4.17367	4.19862	4.1575
YBL038W	4.79245	4.01543	4.12906	4.21514	4.14627	3.64842	3.45738	3.66696
YBL039C	3.7308	4.43629	4.58894	4.33316	4.58267	4.94553	4.94344	4.99337
YBL039W-B	3.60988	3.9295	4.08997	4.17525	4.45738	3.34496	3.21544	3.37623
YBL040C	4.69255	4.27693	4.5154	4.55583	4.54378	4.05859	3.86325	4.00512
YBL041W	5.41705	5.04841	5.15129	5.433	5.34625	4.85041	4.63152	4.79058
YBL042C	2.64423	1.94207	2.09485	2.04177	2.60932	2.94607	2.97122	2.93378
YBL043W	0.906822	2.3754	1.86759	2.65484	2.60777	2.202	1.78743	1.79761
YBL045C	4.51106	4.26934	4.0513	4.66014	4.31887	4.78282	4.80433	4.72788
YBL046W	5.02573	4.34193	4.37497	4.35101	4.15071	4.00882	3.99797	4.02129
YBL047C	5.37715	4.94429	4.99935	5.12107	4.7707	4.67548	4.78696	4.67107
YBL049W	0.176343	0.695882	1.12035	0.827742	0.92296	-0.00541351	-0.961759	0.46356
YBL050W	4.83841	4.52026	4.56544	4.63672	4.79409	4.17089	4.04419	4.13016
YBL051C	6.13249	4.80412	4.92885	5.04165	4.73768	4.80885	4.85824	4.8091
YBL052C	4.20056	4.19137	4.17937	4.22367	4.04103	4.08033	4.14966	4.08338
YBL054W	3.80738	3.35843	3.76871	3.198	3.11785	4.14785	4.18942	4.2178
YBL055C	3.07598	3.54387	3.83347	3.38228	3.66491	3.70378	3.74633	3.60561
YBL056W	4.77517	5.22907	5.1715	5.26682	5.39899	5.37628	5.33511	5.40051
YBL057C	4.37359	3.89184	4.05908	4.08824	4.05607	3.59751	3.35042	3.62186
YBL058W	5.29649	4.82401	4.81251	4.92106	4.77165	4.52123	4.44863	4.5009
YBL059C-A	4.00944	4.25098	4.39217	4.5452	4.34584	3.85084	3.64987	3.81125
YBL059W	4.23575	2.55293	2.97451	3.04058	2.36043	2.00445	2.02816	2.05545
YBL060W	3.55034	3.48393	3.52856	3.47621	3.24981	3.45483	3.56812	3.4592
YBL061C	5.0001	4.42952	4.34995	4.30657	4.46556	4.41783	4.42553	4.45524
YBL063W	3.53702	3.85025	3.78771	3.96077	3.69275	3.65878	3.60153	3.656
YBL064C	4.44218	4.31309	4.57973	4.96581	4.99333	4.28934	4.01901	4.30054
YBL066C	4.11835	4.09703	4.0022	4.07532	3.61827	4.15593	4.25867	4.16549
YBL067C	3.49221	4.28616	4.3111	4.2151	4.13792	4.36308	4.41067	4.33574
YBL068W	3.7018	4.08994	4.19012	3.9803	4.18433	4.31556	4.30144	4.3413
YBL069W	3.14571	3.14438	3.04746	3.00154	3.10087	3.05738	3.08554	2.95598
YBL071C-B	1.6923	2.91004	3.74291	3.11484	2.8307	2.83515	2.88381	2.94287
YBL071W-A	4.27463	3.48456	3.75869	3.38463	3.72009	3.29195	3.02338	3.38364
YBL072C	5.80171	5.05805	5.15391	5.26354	5.20829	5.19235	5.02	5.18271
YBL074C	3.60389	3.55427	3.41551	3.45371	3.31752	3.5598	3.6821	3.52325
YBL075C	3.64227	3.45072	3.4102	3.5962	3.20992	3.53645	3.68254	3.51637
YBL076C	4.57496	5.48404	5.43535	5.47048	5.45882	5.69461	5.70978	5.68573
YBL078C	5.70646	4.55208	4.62755	4.59178	4.69201	3.52221	3.36322	3.46593
YBL079W	4.84942	4.9837	4.78154	4.80698	4.72898	4.92446	4.9444	4.9271
YBL080C	3.70282	3.31249	3.32627	3.46735	3.21723	2.99644	2.98141	2.98632
YBL081W	6.05469	3.97489	4.02934	4.00806	3.80029	4.13258	4.10783	4.21516
YBL082C	1.51201	2.6546	2.42975	2.36882	2.17662	2.49989	2.37709	2.58893
YBL084C	3.66769	3.98345	4.00761	3.96364	3.64822	3.98194	3.93291	4.03223
YBL085W	5.15918	4.56266	4.51897	4.60992	4.38125	4.43521	4.47394	4.40797
YBL086C	4.73029	4.23705	4.02994	4.2046	3.91911	3.35645	3.27403	3.35977
YBL087C	3.76854	3.92022	3.75459	3.82583	3.96903	4.1899	3.95006	4.16061
YBL088C	2.63037	3.7775	3.6086	3.65725	3.37022	3.7741	3.80449	3.76904
YBL089W	2.92239	3.28891	3.29637	3.26584	3.03122	3.51759	3.35153	3.51912
YBL090W	4.8099	4.29802	4.52931	4.53392	4.47506	3.73881	3.68308	3.62778
YBL091C	4.95268	4.32126	4.3661	4.37269	4.34643	3.87763	3.97584	3.89139
YBL091C-A	2.66184	3.44634	3.45401	3.44714	3.50342	2.61838	2.65753	2.76993
YBL092W	5.88043	6.0999	6.03255	6.15009	6.0998	6.33545	6.1763	6.31864
YBL093C	5.02083	3.80686	4.19827	3.90528	3.95742	3.4654	3.58645	3.47825
YBL095W	3.91364	3.56649	3.36174	3.49989	3.26785	3.45456	3.23157	3.43604
YBL097W	4.95976	4.41757	4.49068	4.324	4.12344	4.23335	4.40141	4.23391
YBL098W	1.6305	1.80754	1.17072	0.990528	1.79839	1.84995	1.66825	1.91933
YBL099W	3.96948	5.1725	4.99497	5.26074	5.18863	5.54798	5.50564	5.48617
YBL101C	4.27198	3.84491	3.81825	3.93045	3.66781	3.64657	3.60398	3.57905
YBL102W	4.38406	4.00183	4.10248	3.92482	4.32263	3.69538	3.35232	3.62044
YBL103C	4.88995	4.53291	4.58452	4.2925	4.22535	4.26325	4.26687	4.29532
YBL104C	3.54902	4.12985	4.10233	3.98713	3.86238	3.97195	4.05058	3.95826
YBL105C	5.19675	4.86858	4.84763	4.863	4.53443	4.68772	4.71789	4.70789
YBL106C	3.11657	3.68725	3.98286	2.82521	3.04415	2.49505	2.57563	2.52286
YBL107C	4.85024	4.31174	4.42338	4.48228	4.6042	3.94446	3.64654	4.01155
YBL113C	1.29997	1.17484	1.00701	1.23987	0.829511	0.964753	0.293439	1.01763
YBR001C	4.33096	3.71814	3.70066	3.8835	3.87464	3.74719	3.8272	3.68362
YBR002C	5.57696	4.47464	4.56479	4.45606	4.41915	4.34567	4.26737	4.4148
YBR003W	3.86891	3.99024	3.85026	3.90091	3.82691	3.66386	3.55194	3.62137
YBR004C	2.55364	3.71527	3.86298	3.68245	3.65225	3.79111	3.66793	3.88947
YBR005W	3.55283	3.12763	3.47153	3.29517	3.38964	2.7554	2.66842	2.67231
YBR006W	3.19177	3.0423	3.28196	2.88882	3.19993	2.09263	2.23987	1.931
YBR007C	4.39353	3.8449	4.12809	3.88735	3.72226	3.60709	3.67879	3.60319
YBR008C	6.58526	6.84161	6.86475	6.6613	7.01608	6.91466	7.04463	6.87377
YBR009C	7.05028	6.5194	6.52636	6.93626	6.99044	6.49872	6.3878	6.46419
YBR010W	6.44584	6.36628	6.39621	6.70974	6.90286	6.17459	6.03236	6.12527
YBR011C	6.00281	5.54664	5.60068	5.80501	5.52406	5.37128	5.2929	5.44903
YBR013C	2.65241	2.51962	2.00474	2.20723	2.47043	1.70999	1.50559	1.71557
YBR014C	4.94056	3.96062	4.23042	4.31724	4.40757	3.94011	3.78569	3.8775
YBR015C	4.15581	4.32848	4.3277	4.39467	4.31827	4.43947	4.35036	4.44103
YBR016W	6.72622	3.30394	3.42536	3.21979	3.84044	2.60252	2.55013	2.56591
YBR017C	4.31728	4.80606	4.68904	4.77392	4.61743	4.88545	4.83378	4.91752
YBR018C	0.479913	1.76479	1.54769	1.53649	1.38934	0.918393	0.465712	0.968015
YBR019C	-0.565702	-0.01809	0.156895	-0.615742	-0.224999	-0.845151	-0.785663	-0.937276
YBR020W	0.950435	2.03544	2.24206	2.26201	1.52408	2.45762	2.39355	2.49182
YBR021W	1.18574	1.83223	1.39678	1.88583	1.70109	2.75925	2.74191	2.83778
YBR022W	3.50806	3.45888	3.31953	3.3338	3.25238	2.92645	2.70432	2.95393
YBR023C	3.73478	4.34555	4.16822	4.29341	4.29188	4.55876	4.56715	4.5524
YBR024W	3.89032	3.44851	3.4381	3.47493	3.54448	3.00927	2.83832	3.02634
YBR025C	4.7063	5.92675	5.74866	6.08734	5.85333	6.07683	5.99165	6.09151
YBR026C	3.33953	3.65551	3.33698	3.69828	3.67857	3.35088	3.15471	3.24479
YBR028C	4.46923	4.04229	4.16632	4.14561	4.19281	4.24743	4.27878	4.26244
YBR029C	4.12312	5.02891	5.184	4.33068	5.03922	4.62666	4.55312	4.66912
YBR030W	3.51058	4.28722	4.39969	3.81752	4.05024	4.06728	4.05782	4.067
YBR031W	4.65346	4.72641	4.90121	4.91112	4.85788	5.13883	5.04976	5.19637
YBR033W	1.51162	1.03517	1.08587	0.812889	0.786214	0.282565	-0.0177009	0.159356
YBR034C	4.55754	4.92349	5.06353	4.92201	5.12849	5.42966	5.3258	5.45931
YBR035C	4.91731	4.04578	4.20807	4.1109	4.22882	3.55344	3.40797	3.47146
YBR036C	4.70402	4.63537	4.59335	4.54399	4.63971	4.58071	4.43017	4.53407
YBR037C	4.25278	2.83514	2.66936	2.78253	2.42671	2.1141	1.89467	2.2777
YBR038W	4.48712	4.04792	3.92877	4.04625	4.03718	4.33519	4.27049	4.35264
YBR039W	4.03769	4.80579	4.80851	5.10818	4.79363	5.0853	5.16205	5.01323
YBR040W	-2.11285	-0.232451	0.518369	0.0796005	-0.0697121	0.954266	1.45047	0.739513
YBR041W	4.03683	4.02711	3.86269	4.03607	3.96002	4.10529	4.03536	4.04464
YBR042C	2.85894	3.67683	3.68256	3.68909	3.55971	3.67325	3.44603	3.64929
YBR043C	3.96337	3.74323	3.93685	3.82223	3.71618	3.82461	3.88229	3.86645
YBR044C	3.86648	3.66768	3.72468	3.64488	3.22145	3.57598	3.53849	3.60756
YBR045C	1.81327	1.9818	2.31796	2.39698	2.00222	2.60898	2.49586	2.49564
YBR046C	5.21946	4.16386	5.14682	4.73399	5.27339	4.37615	4.3019	4.33812
YBR047W	4.19915	4.18654	5.38095	4.91748	5.05738	4.19316	3.85382	4.18516
YBR048W	4.7863	4.67259	4.75942	4.62824	4.68113	5.12561	5.00795	5.22553
YBR049C	4.76026	5.0063	5.01834	5.22864	5.01011	4.8991	4.99706	4.84818
YBR050C	1.54249	-0.0733169	0.618837	1.28589	1.05736	1.38755	1.32497	1.38919
YBR052C	4.84834	3.80526	4.0882	4.42244	4.44671	3.58802	3.38475	3.60086
YBR053C	3.79323	3.77319	4.00621	3.90236	4.03191	3.37166	3.29999	3.28899
YBR054W	2.43549	2.58646	3.65401	5.08188	4.76659	5.33122	5.47482	5.20712
YBR055C	3.75318	4.20266	4.22699	4.21321	3.96892	4.09943	4.11059	4.11467
YBR056W	3.35782	3.80962	3.88488	4.06654	3.8535	3.40547	3.23122	3.41083
YBR056W-A	3.08789	2.98337	3.35316	2.8165	3.41678	3.18571	2.86283	3.27213
YBR057C	4.60048	4.31754	4.27319	4.41862	4.13365	4.0491	4.10359	4.1019
YBR058C	3.80901	4.17113	4.01324	4.00038	3.92004	3.9928	4.03361	4.00011
YBR058C-A	4.92364	4.5057	4.5635	4.5253	4.6649	3.87704	3.51325	3.83058
YBR059C	4.8514	4.72301	4.6798	4.85569	4.59505	4.48422	4.46343	4.4924
YBR060C	4.19179	3.91994	4.08431	4.14687	3.68384	3.94558	3.96175	3.98513
YBR061C	3.49953	3.96788	3.84903	3.93892	3.86733	3.9933	4.01751	4.01165
YBR062C	3.53148	3.00103	3.23748	3.42144	3.32311	2.74638	2.60542	2.72387
YBR063C	3.19925	3.93996	4.30168	4.23629	3.95594	4.35195	4.38449	4.3588
YBR065C	4.19657	4.19564	4.31408	4.20462	4.1096	4.01237	4.12573	4.00675
YBR066C	4.67762	3.24448	4.45674	3.56963	4.01793	3.50343	3.5453	3.54359
YBR067C	5.66	5.44789	5.47955	5.80075	5.53404	5.54666	5.53435	5.56534
YBR068C	6.10066	6.15867	6.16033	5.98639	5.76626	6.31976	6.2875	6.25083
YBR069C	4.26219	4.18518	4.55216	4.47909	4.53769	5.44779	5.47456	5.40812
YBR070C	2.86555	3.56066	3.62537	3.5217	3.27176	2.8285	2.59573	2.72903
YBR071W	5.8251	4.73437	5.11155	4.85089	5.06545	4.7417	4.69991	4.66284
YBR072C-A	2.97453	1.94916	1.95091	2.35377	2.05229	1.09754	0.68282	1.60844
YBR072W	3.19062	2.50274	2.81361	4.10502	3.22202	1.85774	2.21528	1.63625
YBR073W	4.92066	4.44166	4.30802	4.38405	4.40706	4.37603	4.3793	4.36566
YBR074W	3.69755	4.06302	3.91657	3.90389	3.79234	4.09603	4.04388	4.1014
YBR077C	4.19771	4.10985	4.34765	4.18205	4.27585	3.59574	3.29921	3.53582
YBR078W	5.00953	6.0733	5.74603	5.99811	6.15326	6.45378	6.47698	6.42268
YBR079C	5.00601	5.64162	5.6172	5.71673	5.60399	5.84474	5.91657	5.84691
YBR080C	3.94257	4.57243	4.44859	4.41247	4.49468	4.53215	4.4995	4.52917
YBR081C	4.72726	4.927	4.79114	4.86381	4.58816	4.4485	4.502	4.45478
YBR082C	6.97015	5.66446	5.9096	6.09959	5.85232	5.27629	5.18642	5.29288
YBR083W	4.69422	2.77857	2.67791	4.08504	3.43496	4.27146	4.28646	4.27692
YBR084C-A	5.10864	4.97128	5.10592	5.06199	4.91767	5.22032	5.17697	5.24736
YBR084W	3.88958	4.12726	4.14881	4.02756	3.95847	4.45739	4.49346	4.4778
YBR085C-A	5.65608	5.41745	5.84019	5.51818	6.29109	4.74757	4.43472	4.6687
YBR085W	1.97565	2.87917	2.98734	2.29411	2.55596	2.23284	1.95686	2.20638
YBR086C	4.50943	4.92602	4.86414	5.04757	4.90298	5.23817	5.20261	5.19324
YBR087W	2.92744	3.97485	4.09422	4.21005	4.07202	4.05229	3.92085	4.02527
YBR088C	4.68271	4.38173	4.6541	4.94601	4.89866	4.67963	4.38819	4.66702
YBR089C-A	3.86413	3.0296	2.40088	2.69758	3.53308	2.66629	2.50585	2.85282
YBR090C	3.42511	0.808101	1.69244	1.26303	2.12109	0.687291	0.681892	1.05098
YBR091C	3.55377	3.59608	3.79153	3.51004	3.77982	2.98435	2.96358	2.9566
YBR092C	3.81941	2.48437	2.77738	3.06973	3.62454	4.38884	4.21811	4.29954
YBR093C	2.9797	2.78568	2.72117	2.2608	2.97733	3.11803	3.01155	3.08414
YBR094W	3.13968	3.74918	3.68508	3.77625	3.60262	3.6705	3.72252	3.70605
YBR095C	4.42658	4.37898	4.4826	4.26414	4.38678	4.08435	4.10961	4.07491
YBR096W	4.44524	3.66323	3.74957	3.78706	3.82031	3.64158	3.37556	3.64095
YBR097W	2.97217	3.93317	3.75102	3.89938	3.6204	3.72498	3.74947	3.75016
YBR098W	3.17854	3.42501	3.34807	3.21667	3.13316	2.99775	3.07537	2.97196
YBR101C	6.46628	6.70178	6.59221	6.92306	6.80561	6.26693	6.21148	6.28273
YBR102C	4.20948	4.39614	4.29771	4.25623	4.16183	4.09384	4.23421	4.09741
YBR103W	4.38092	3.95511	4.02042	3.98299	3.8944	3.70726	3.63706	3.74198
YBR104W	4.60357	4.05355	4.50413	3.9009	4.33823	3.99781	3.9735	3.95786
YBR105C	5.06632	3.0644	3.71242	3.74589	3.91731	3.86239	3.91414	3.80089
YBR106W	5.27291	5.24947	5.34201	5.44222	5.53151	5.26672	5.09026	5.27774
YBR107C	3.74937	3.23014	3.52471	3.48399	3.27133	3.02013	2.96835	3.05396
YBR108W	4.73625	3.17875	3.08625	3.19267	2.89631	2.50628	2.44222	2.34065
YBR109C	5.36317	5.48405	5.63618	5.65823	5.8708	5.3473	5.34212	5.32824
YBR110W	4.00522	4.19043	4.43993	4.00821	4.35836	4.14305	4.0623	4.0884
YBR111C	4.49942	4.01833	3.9403	4.25308	4.32853	3.87012	3.56431	3.84837
YBR111W-A	3.65275	3.66953	3.93197	3.99322	3.89022	3.29997	3.02694	3.36759
YBR112C	6.27718	4.71502	4.91373	5.0066	4.68663	4.66151	4.7703	4.65163
YBR114W	3.62493	3.02168	3.13634	3.37366	3.12367	3.35981	3.39318	3.23881
YBR118W	5.52766	5.90259	5.96964	6.05888	5.91885	5.72846	5.74574	5.71341
YBR119W	3.94011	3.68004	4.01954	4.08809	3.69452	3.39275	3.33167	3.34266
YBR120C	4.42032	4.13628	4.12827	4.36557	4.17655	3.64636	3.3579	3.6401
YBR121C	4.58783	5.20648	5.08315	5.16613	5.18545	5.43878	5.42718	5.45258
YBR122C	5.50908	4.56953	4.62483	4.61998	4.71506	4.27878	4.10095	4.29059
YBR123C	4.11261	3.94251	3.81135	3.81178	3.66105	3.61977	3.68431	3.64264
YBR125C	3.8324	3.80757	3.91561	3.94607	3.64172	3.87562	3.61741	3.93228
YBR126C	5.64543	4.6649	4.53331	4.66838	4.94317	4.28898	4.22077	4.2648
YBR126W-A	2.83759	2.0143	1.9282	2.51448	3.1421	1.18235	1.53568	0.922977
YBR127C	4.86792	5.25491	5.27744	5.30787	5.43274	5.32425	5.3121	5.29481
YBR128C	2.93683	2.77685	3.03366	3.06239	2.71929	2.22591	2.13734	2.21333
YBR129C	3.62732	4.14555	4.23635	4.24238	4.13139	3.99151	3.98227	3.98981
YBR130C	5.1097	5.01342	5.12002	5.14182	5.05823	4.78522	4.83149	4.83239
YBR131W	3.98348	3.85775	3.96156	3.60387	3.5834	3.69004	3.77776	3.70036
YBR132C	4.71576	3.9041	4.15662	4.19539	4.47535	3.88082	3.84116	3.72153
YBR133C	3.86851	3.85189	3.98074	4.07358	3.70921	4.14498	4.2096	4.10806
YBR135W	4.73971	3.55066	3.73155	3.52574	3.47512	3.21142	3.0688	3.34061
YBR136W	2.65942	3.78128	3.61985	3.5872	3.42325	3.40847	3.42496	3.442
YBR137W	3.18384	3.29538	3.33903	3.48929	3.71587	2.94972	2.71365	2.88344
YBR138C	4.00164	3.75455	3.89413	3.80549	3.70165	3.45822	3.36577	3.48385
YBR139W	4.29283	3.83879	3.90261	4.1532	4.17413	3.60542	3.46155	3.62593
YBR140C	4.08626	4.71037	4.45194	4.63312	4.40751	4.51224	4.52464	4.49396
YBR141C	2.84525	3.66961	3.80142	3.51406	3.38387	3.53317	3.59265	3.51288
YBR142W	3.41611	4.4589	4.49471	4.28393	4.26609	4.62873	4.71052	4.6839
YBR143C	5.91353	5.61487	5.65182	5.71499	5.83802	5.96308	5.93769	5.9789
YBR145W	3.45568	3.95339	4.48197	3.61776	4.40232	3.47408	3.22216	3.47711
YBR146W	5.00917	4.97252	5.09315	5.18218	5.11873	4.751	4.71243	4.76368
YBR147W	1.44117	1.8801	1.92224	2.22028	2.21457	1.66318	0.765837	1.89449
YBR148W	1.62873	1.32777	0.867598	0.363478	0.720781	0.309685	0.392387	0.108142
YBR149W	4.71411	4.48418	4.585	4.87192	4.64211	4.29437	4.18476	4.31007
YBR150C	3.48957	4.19742	4.16346	4.2545	4.00147	4.12707	4.11007	4.18912
YBR151W	5.51145	4.35956	4.46817	4.60038	4.60497	4.19006	4.08416	4.15886
YBR152W	4.4517	4.0466	4.31951	4.28234	4.03	3.70493	3.7648	3.85686
YBR153W	4.13698	4.05355	3.9179	3.9751	3.88582	3.99206	3.98617	3.97752
YBR154C	5.86887	4.96195	5.12103	5.21557	5.34456	5.21293	5.10557	5.29095
YBR155W	4.29741	4.22969	4.47337	4.38798	4.25452	4.17818	4.16798	4.2693
YBR156C	3.78984	3.66878	3.68341	3.84974	3.43708	3.4341	3.55911	3.48525
YBR157C	4.12904	3.25778	3.56807	3.9644	3.42814	3.48946	3.51022	3.35577
YBR158W	5.14864	5.31462	5.30333	5.44002	5.26055	5.8041	5.85198	5.77971
YBR159W	3.56864	4.14138	4.1645	4.27241	4.37407	4.16901	4.10235	4.11723
YBR160W	4.45627	4.23904	4.2094	4.3315	4.29974	3.96523	3.8717	3.9961
YBR161W	3.56548	3.52154	3.43861	3.46079	3.43002	3.63577	3.55488	3.60412
YBR162C	4.79253	5.43712	5.34763	5.4114	5.71636	5.79282	5.73353	5.80473
YBR162W-A	6.67325	4.64008	5.11072	5.22549	5.21687	4.50881	4.36274	4.52981
YBR163W	3.21431	3.60705	3.66054	3.6699	3.29131	3.83024	3.74382	3.82283
YBR164C	4.60131	4.83629	4.82109	4.79604	4.85392	4.37001	4.07226	4.43459
YBR165W	4.1062	4.56623	4.76353	4.53786	4.41175	4.34516	4.27288	4.3734
YBR166C	3.80733	4.42343	4.45598	4.53874	4.38662	4.3685	4.31241	4.42766
YBR167C	3.46267	3.83394	3.83574	3.89743	3.80791	3.34037	3.27463	3.29366
YBR168W	3.08004	3.45279	3.41777	3.4558	3.36721	3.21624	3.21044	3.16346
YBR169C	3.90755	4.30189	4.14557	4.78694	4.28513	3.67053	3.5772	3.66622
YBR170C	4.57216	4.30036	4.38742	4.4221	4.1742	4.19812	4.21649	4.15862
YBR171W	4.68129	4.68696	4.89543	4.93289	4.921	4.34192	4.31093	4.32425
YBR172C	5.07077	4.89621	4.93687	4.79916	4.45981	4.84001	4.90447	4.8962
YBR173C	6.33858	4.64182	5.1474	5.14815	4.85408	4.24561	3.97515	4.2256
YBR175W	4.25509	3.26662	3.25367	3.13613	3.11361	2.88705	2.89071	2.80549
YBR176W	3.1899	3.39203	3.65677	3.33865	3.46705	3.15832	2.72714	3.19742
YBR177C	4.98588	5.32226	5.18292	4.61173	5.24561	4.33621	4.17136	4.30227
YBR179C	4.62784	4.6071	4.66864	4.59112	4.4644	4.30914	4.31745	4.31964
YBR180W	-0.580131	-0.873987	-0.76831	-1.19438	-0.0246992	-0.625074	-0.76883	-0.522397
YBR181C	4.49447	4.51001	4.68044	4.74684	4.73948	4.80052	4.64401	4.84044
YBR182C	1.43804	1.95334	2.11365	1.60149	1.34476	1.70138	1.38392	1.62027
YBR183W	2.70102	1.4199	2.0481	2.46469	2.98629	2.70646	2.32581	2.71295
YBR184W	2.46308	2.05571	2.1928	2.36402	2.15703	1.9408	1.83895	1.96655
YBR185C	3.32353	4.3517	4.37648	4.46928	4.27587	4.13879	3.9806	4.10882
YBR186W	-0.372375	-1.02528	-1.34395	-0.930015	-1.04756	-0.878574	-1.32759	-0.7447
YBR187W	3.4696	4.43952	4.42277	4.37115	4.66323	4.51846	4.3042	4.55633
YBR188C	4.00158	3.64047	3.92583	3.82958	3.8589	3.11969	3.15321	3.1628
YBR189W	5.23526	5.55018	5.74889	5.80519	5.56826	5.91251	5.91925	5.90609
YBR191W	4.30964	4.75777	4.78	4.79419	4.72108	5.1598	5.07089	5.18875
YBR192W	3.96101	4.23587	4.19845	4.24446	3.80345	4.02268	3.97077	4.06505
YBR193C	3.58474	3.71636	3.88015	3.74102	3.55126	3.4366	3.46031	3.29639
YBR194W	3.57611	3.90576	3.79178	3.8088	3.79532	3.28735	3.18015	3.23251
YBR195C	3.33338	3.64677	3.60304	3.41154	3.30192	3.45341	3.46766	3.46228
YBR196C	5.60259	6.20959	6.03713	6.08422	6.20103	6.13355	6.1589	6.09595
YBR196C-A	-1.41746	1.43793	2.14472	2.33737	1.44039	2.98631	2.70619	2.99135
YBR196C-B	1.57797	1.09294	2.14262	1.80444	1.79994	3.38625	2.99246	3.26296
YBR197C	4.1291	3.60752	3.68078	3.59607	3.27659	3.35401	3.20498	3.45551
YBR198C	5.58472	4.8238	4.69794	4.74472	4.64723	4.62377	4.64082	4.5933
YBR199W	5.34729	5.06505	5.05199	5.07762	5.04101	4.731	4.64571	4.74763
YBR200W	4.66486	4.22791	4.19691	4.17623	4.13714	4.02837	3.9114	4.02565
YBR201C-A	3.45902	3.17147	3.21226	2.86794	2.42766	2.63289	2.06089	2.70603
YBR201W	3.74954	4.2262	4.39423	4.26509	4.27868	3.61924	3.45397	3.60609
YBR202W	4.65996	4.28471	4.22502	4.23058	4.09403	4.46655	4.43214	4.44478
YBR203W	2.47858	2.15414	2.35289	1.9603	1.90444	2.35437	2.32532	2.22161
YBR204C	3.33128	3.7272	3.63678	3.82292	3.78737	3.25009	3.26453	3.15869
YBR205W	3.61011	3.31868	3.49772	3.51866	3.66506	3.47438	3.38977	3.42187
YBR207W	4.74774	4.79947	5.31721	4.50383	5.10463	4.51913	4.47792	4.49644
YBR208C	3.21381	2.81079	2.4123	2.64973	2.81898	2.99105	2.96627	2.9128
YBR210W	4.77637	4.02106	4.0054	4.25261	4.10383	3.34981	3.4059	3.39938
YBR211C	3.8381	4.13719	4.41081	4.32933	4.04505	3.87671	3.90654	3.96201
YBR212W	4.55099	4.54057	4.46348	4.62257	4.24291	4.24252	4.15377	4.27722
YBR213W	3.7883	2.89365	2.91039	3.44222	2.99534	2.53278	2.36451	2.65852
YBR214W	5.05584	3.74018	3.64473	3.759	3.81775	3.20152	3.05189	3.17048
YBR215W	4.58876	4.22617	4.34308	4.24487	3.82878	3.76083	3.79451	3.7799
YBR216C	3.76011	4.10849	3.94053	3.96115	3.92791	4.12604	4.10454	4.1086
YBR217W	3.29433	3.99663	4.24439	4.14156	3.91952	3.74854	3.77371	3.71792
YBR218C	4.25248	3.80783	3.73562	4.00724	4.2374	4.28154	4.28942	4.20269
YBR220C	3.00206	3.45781	3.47515	3.19977	3.31739	3.43248	3.49843	3.45405
YBR221C	4.26668	4.68388	4.78177	4.84397	5.06435	4.97719	4.88268	4.96858
YBR222C	3.98725	3.45259	3.24294	3.42132	3.53236	3.43528	3.16775	3.51468
YBR223C	3.77048	3.36506	3.33496	3.36776	3.26532	2.97842	2.94042	2.94921
YBR225W	4.08315	3.90071	3.88242	3.95845	3.63215	3.7159	3.74329	3.72512
YBR227C	4.29876	4.11929	4.06028	3.98236	4.06395	3.81832	3.84209	3.84774
YBR228W	3.80315	3.42765	3.4774	3.25155	3.39199	3.23929	3.01559	3.29037
YBR229C	3.72328	4.12729	4.03415	4.1977	3.91882	4.02224	4.08111	3.95486
YBR230C	4.87191	3.29617	2.82849	3.77701	3.61843	2.70965	2.78718	2.66097
YBR230W-A	4.93783	2.16155	2.56032	2.35586	2.81763	1.49868	1.38177	0.880699
YBR231C	4.80549	3.40537	3.60087	3.56574	3.44746	2.73493	2.51979	2.76349
YBR233W	4.27837	3.54219	3.5016	3.58378	3.43295	3.1078	2.96498	3.04869
YBR233W-A	5.61629	3.78168	4.30059	4.16803	3.89918	3.18692	2.6797	3.25544
YBR234C	3.99701	4.46378	4.41865	4.41535	4.48421	4.07885	4.03148	4.03716
YBR235W	3.4808	3.64966	3.59213	3.50348	3.50044	3.61757	3.61273	3.62041
YBR236C	4.01383	4.35059	4.22212	4.27073	4.3377	3.94671	3.92884	3.99395
YBR237W	4.20062	3.97016	3.92118	3.92974	3.75567	3.7297	3.79844	3.71012
YBR238C	4.08712	3.61522	3.74572	3.78193	3.69181	4.4578	4.46195	4.46757
YBR239C	3.48805	2.85152	3.02044	2.7166	2.53613	2.93609	2.95259	2.86509
YBR240C	1.21755	0.843477	0.756507	-0.150739	0.836843	-0.0234963	0.259828	-0.151605
YBR241C	2.97726	1.73453	1.60072	1.63592	1.98547	1.08743	1.03921	1.06546
YBR242W	3.84942	3.85552	3.9121	3.89341	3.91937	3.77576	3.57874	3.80361
YBR243C	3.903	3.88349	3.86338	3.58126	3.77337	3.68389	3.70115	3.61525
YBR244W	7.28346	7.30965	7.60378	7.54901	7.54807	6.91378	6.81616	6.93101
YBR245C	4.05173	4.5108	4.41856	4.40543	4.31067	4.42691	4.51311	4.43265
YBR246W	3.71642	3.93745	3.91427	3.79205	3.6499	3.82201	3.83543	3.85996
YBR247C	4.24762	4.58689	4.68559	4.5696	4.52893	4.75061	4.71944	4.81736
YBR248C	4.75213	4.64635	4.79978	4.69901	4.80502	4.68587	4.65751	4.71506
YBR249C	4.43046	4.40997	4.67569	4.59661	4.41569	4.92146	4.82357	4.91279
YBR250W	0.248877	1.30426	1.22531	0.917486	0.465474	0.877019	0.655483	0.791966
YBR251W	4.44276	4.04803	4.05069	4.1028	3.97423	3.87712	3.79232	3.89063
YBR252W	4.31029	3.56005	3.51814	3.5179	3.99419	3.28822	2.96633	3.34089
YBR253W	4.9644	4.38547	4.83155	4.77336	4.82758	3.89707	3.84423	3.76347
YBR254C	3.68788	4.12005	4.3765	4.09938	4.25626	3.42301	3.40883	3.30703
YBR255C-A	3.74563	3.21412	3.42464	3.66412	3.29756	3.18002	2.86009	3.22866
YBR255W	4.2483	4.07852	4.2419	4.11	3.88359	3.7709	3.85887	3.85885
YBR256C	5.00654	4.6048	4.84459	4.54464	4.74102	4.22637	4.02689	4.29394
YBR257W	3.86596	4.21057	4.44644	4.17314	3.95531	4.01639	3.80275	4.15792
YBR258C	5.53459	3.27703	3.72885	3.86533	3.73795	3.18707	2.84004	3.22455
YBR259W	2.93978	3.65208	3.65934	3.61744	3.46308	3.73838	3.78848	3.76228
YBR260C	4.26727	4.36367	4.33349	4.3069	4.24273	4.03803	4.11417	4.01921
YBR261C	3.85455	3.23085	3.38851	3.16277	3.42878	2.73253	2.61742	2.61378
YBR262C	5.20521	3.4927	3.44156	3.50407	3.71909	2.95904	2.52137	2.90194
YBR263W	3.96637	3.9232	3.77687	3.63944	3.82851	3.73865	3.68777	3.79541
YBR264C	4.44644	3.00256	2.43651	2.66555	3.00908	2.38093	2.14182	2.3715
YBR265W	4.27534	3.88942	3.8997	3.99026	3.99815	3.77199	3.53964	3.79976
YBR267W	5.12834	4.18698	4.4616	4.20623	4.0553	4.44084	4.40877	4.49891
YBR268W	5.45298	3.92827	4.0176	3.98584	4.09226	3.33105	3.14007	3.15511
YBR269C	4.78355	3.73503	3.69694	3.44006	3.57473	2.83951	2.37382	2.97967
YBR270C	2.969	2.41416	2.24283	2.25526	1.89124	2.13972	2.06509	2.15997
YBR271W	3.1879	3.50863	3.31998	3.15442	3.28977	3.37744	3.29884	3.40405
YBR272C	3.17944	3.88535	3.69687	3.77734	3.87126	3.58463	3.59633	3.54596
YBR273C	4.03586	3.86426	3.90301	3.93243	3.90796	3.4659	3.34482	3.53413
YBR274W	2.58673	3.50971	3.32495	3.36774	3.397	3.26593	3.13792	3.32918
YBR275C	3.63504	4.04872	3.83843	3.90793	3.74725	3.74176	3.82921	3.74631
YBR276C	3.54417	3.87068	3.78702	3.89946	3.80353	3.87611	3.84629	3.85695
YBR278W	3.54007	3.28413	3.34461	3.63428	3.26864	2.87876	2.7435	3.08352
YBR279W	5.76257	4.90633	4.99667	5.06824	4.97936	4.56153	4.63222	4.60527
YBR280C	3.15598	3.22687	3.05358	3.17823	3.00402	2.62342	2.56475	2.56201
YBR281C	3.39357	4.42561	4.19695	4.70225	4.14317	4.52414	4.49528	4.57899
YBR282W	5.073	4.03789	4.14486	4.45227	4.1955	3.48225	3.30211	3.53251
YBR283C	4.00676	5.25195	5.17008	5.31354	5.47276	5.60995	5.49712	5.61078
YBR284W	1.28256	1.22517	1.04791	1.23927	0.965102	1.00103	0.929491	1.01394
YBR285W	1.43004	-0.314237	0.0824334	-0.299534	0.655184	0.122373	0.0973613	-0.299494
YBR286W	5.53287	5.02829	4.97408	5.14839	5.29144	4.97885	4.93479	5.01825
YBR287W	3.82238	4.47559	4.58235	4.443	4.80632	4.5953	4.52482	4.55692
YBR288C	3.24848	4.12971	4.17619	4.13732	4.01263	4.17097	4.10617	4.1985
YBR289W	5.70633	4.24518	4.34895	4.22205	4.03596	3.90808	3.99702	3.90443
YBR290W	5.83551	4.39325	4.49602	4.35835	4.26728	4.04356	3.88592	4.05468
YBR291C	2.42694	2.15654	2.35701	2.30377	2.1229	2.14598	2.09834	2.08354
YBR293W	2.45916	3.25761	3.30615	2.9474	3.05115	3.38851	3.44432	3.41991
YBR294W	-0.24112	-0.914097	-0.701923	-0.826316	0.881122	-0.72927	-0.993754	-0.928638
YBR295W	2.72948	3.80759	4.06136	3.30378	3.8725	3.47485	3.49266	3.51809
YBR296C	2.17859	-0.624131	0.143534	-1.69811	3.09808	2.70955	2.61388	2.88553
YBR297W	1.94556	1.46793	1.60196	2.44047	1.52558	2.17936	1.91634	2.10569
YBR298C	1.42278	2.3201	2.17844	2.88314	2.15477	3.03093	3.01524	2.97958
YBR299W	-1.85016	-2.07355	-1.04956	-0.494625	-2.1164	-0.842895	-1.70543	-1.59019
YBR302C	0.238998	1.23461	1.30133	1.72706	0.608887	-0.313182	-0.0206113	-0.787052
YCL001W	3.72627	4.28935	4.21781	4.36684	4.49985	4.37234	4.02556	4.44247
YCL001W-A	0.870366	2.05073	1.8224	1.89918	1.60332	1.33061	1.77077	1.20445
YCL001W-B	1.4524	1.93495	1.81379	1.51599	1.60015	1.52946	0.630205	1.55087
YCL002C	2.86812	3.65199	3.84083	3.8297	3.71243	3.95991	3.65783	4.00855
YCL004W	3.17089	3.67932	3.55	3.52066	3.30519	3.46403	3.32509	3.46484
YCL005W	4.10172	3.20821	3.23472	3.17886	3.07615	3.27876	3.02986	3.23647
YCL005W-A	4.66507	4.19201	4.27626	4.28389	4.53095	4.04755	3.75821	4.06168
YCL008C	4.72708	2.94951	2.99256	2.92763	2.72738	2.5279	2.50683	2.53312
YCL009C	5.21864	4.2501	4.2867	4.40461	4.27558	4.20975	4.22692	4.25876
YCL010C	4.469	4.46873	4.57308	4.32665	4.4921	4.25621	4.40471	4.28348
YCL011C	5.86845	5.06592	5.08587	4.94647	4.94158	4.9893	4.98495	5.02268
YCL012C	3.09963	3.29766	3.35184	3.30589	3.43525	2.89271	2.28389	3.00336
YCL014W	3.66617	4.04615	3.94504	3.80349	3.76463	3.73525	3.80132	3.74378
YCL016C	3.49278	3.25107	3.35096	3.20494	3.27105	2.93636	2.89841	3.02377
YCL017C	4.26205	4.43526	4.53869	4.10098	4.41628	3.96685	4.01652	3.9161
YCL021W-A	2.41905	2.38511	2.18506	2.969	2.44932	3.13335	3.40112	3.27376
YCL024W	3.72515	3.03498	3.20722	3.49495	3.09524	3.28548	3.17637	3.28737
YCL025C	4.33819	2.72456	3.24539	3.73369	4.08493	4.03497	4.02144	3.91058
YCL026C-A	4.19438	6.44391	7.40488	5.61768	7.16341	5.52222	5.62663	5.52846
YCL026C-B	5.63327	6.16795	6.78881	6.40706	6.51129	5.42873	5.55581	5.47993
YCL027W	3.0756	2.39401	2.47072	4.05032	2.79883	3.74419	3.87493	3.80471
YCL028W	4.80079	3.65489	3.65592	3.72368	3.68937	3.20769	3.29991	3.22943
YCL029C	4.40248	3.61227	3.74123	3.71471	3.31199	3.14086	3.16737	3.11413
YCL030C	3.41962	4.10833	4.23254	4.64279	4.72183	4.87371	4.77703	4.88283
YCL031C	5.99033	5.40934	5.56955	5.56048	5.49918	5.37673	5.2603	5.41929
YCL032W	3.89098	3.5956	3.5583	3.5104	3.29331	3.1218	3.06574	3.185
YCL033C	2.80824	1.7516	1.93946	2.09696	1.75445	1.23393	1.24263	1.37534
YCL034W	4.86225	4.07821	3.92656	3.90218	4.0208	3.24384	3.10605	3.14785
YCL035C	5.4798	4.57176	4.67974	4.87831	5.2342	4.13766	4.01078	4.11712
YCL036W	2.3003	2.18879	2.13235	1.62304	1.7054	2.81581	2.75681	2.85595
YCL037C	6.57724	5.35266	5.39929	5.35318	5.00202	5.52353	5.64557	5.5115
YCL038C	2.04936	2.91116	2.70076	2.686	2.79416	2.62946	2.64406	2.57154
YCL039W	4.44937	3.47064	3.30609	3.33315	2.98063	2.89114	2.80554	2.8208
YCL040W	5.08091	3.78768	3.67775	4.30468	4.46357	3.56218	3.6128	3.40973
YCL043C	5.43172	5.04561	5.06576	5.16132	5.26249	5.1545	5.15988	5.10914
YCL044C	5.37783	3.40617	3.40589	3.40755	3.14336	3.16497	3.21121	3.21358
YCL045C	4.43386	4.53638	4.35819	4.46922	4.28327	4.46263	4.39638	4.43275
YCL047C	3.29716	3.37322	3.26216	3.27094	3.24321	2.90474	2.77336	2.90009
YCL049C	2.49852	2.08357	2.28462	1.97457	1.49278	1.78113	1.8648	1.75675
YCL050C	5.79682	5.74966	5.70771	5.85481	5.62224	5.32683	5.26121	5.37386
YCL051W	4.48799	4.16653	4.20837	4.11057	3.91184	3.76799	3.84595	3.78678
YCL052C	4.40905	4.21734	4.12801	4.14627	4.20485	3.91591	3.8236	3.83036
YCL054W	4.75764	4.95642	4.97801	4.7184	4.75463	5.01167	5.06596	5.07381
YCL055W	3.43618	3.79485	3.92068	4.35076	3.80484	4.25454	4.34649	4.31226
YCL056C	4.80055	3.56786	3.63288	3.92776	3.5465	3.2649	3.14154	3.36864
YCL057C-A	4.50233	3.49316	3.50284	3.28989	3.65075	2.9848	2.48195	2.93981
YCL057W	4.46052	4.52629	4.33731	4.53612	4.48392	4.30979	4.13115	4.21474
YCL058C	0.236053	1.14642	0.234826	0.825838	1.00682	0.7654	-0.360498	0.763743
YCL058W-A	4.33655	3.27642	3.83933	3.79738	3.77129	3.11182	3.33332	3.06531
YCL059C	4.3213	4.41557	4.69564	4.51394	4.60667	4.54453	4.4566	4.64271
YCL061C	4.70408	4.3899	4.3919	4.44927	4.08449	3.98207	4.06259	4.00721
YCL063W	4.51028	3.91988	4.02601	3.7661	3.82644	3.64072	3.69519	3.6099
YCL064C	5.80167	2.56524	5.75213	4.02571	5.84988	4.52842	4.49783	4.59635
YCR002C	4.08029	4.84147	4.9038	4.79372	5.10035	4.65963	4.54139	4.67313
YCR003W	5.04225	4.5327	4.83709	4.7109	4.81661	4.04765	3.64971	4.09573
YCR004C	5.68061	4.97249	5.37114	5.01974	5.2552	4.34942	4.34125	4.34554
YCR005C	6.24083	6.67245	6.71395	5.66846	6.6671	5.49004	5.3162	5.38489
YCR007C	2.72625	2.33381	2.35989	2.30058	1.46984	2.39956	2.10512	2.27433
YCR008W	4.8857	4.60951	4.51477	4.62413	4.73882	4.85947	4.82157	4.856
YCR009C	5.03583	5.08154	5.36602	5.51195	5.48375	4.95481	4.9079	4.95929
YCR011C	4.171	4.12916	4.13094	4.35377	4.39501	4.32239	4.34273	4.30619
YCR012W	5.68989	7.34372	7.14362	7.42881	7.45346	7.40026	7.47196	7.34234
YCR014C	3.27276	3.58321	3.30956	3.47795	3.03051	3.65917	3.73159	3.73724
YCR015C	3.99538	4.12878	4.13331	4.19696	4.11621	4.1543	4.22243	4.20444
YCR016W	4.92679	4.59839	4.93534	4.7479	4.78554	4.56635	4.60278	4.61452
YCR017C	3.70981	4.1769	4.1967	4.0425	4.29751	4.34979	4.29287	4.33142
YCR018C	4.22677	3.14903	3.49163	3.64629	3.61945	3.21913	3.02539	3.23057
YCR019W	3.80047	3.74858	3.68843	3.66773	3.47692	3.36138	3.35428	3.39409
YCR020C	1.48938	1.76818	1.7235	1.66793	1.6436	1.72298	1.93124	1.63676
YCR020C-A	4.41062	3.80989	4.19506	3.70554	4.24592	3.36058	3.04201	3.25576
YCR020W-B	4.57624	4.76588	5.31036	5.13982	4.85381	4.48408	4.4192	4.49458
YCR021C	3.49645	5.81881	5.89833	5.42989	5.85625	4.46245	4.56381	4.50685
YCR023C	3.05081	4.26193	4.35825	4.43175	4.11921	4.43427	4.36124	4.41157
YCR024C	3.81323	3.95191	4.0933	4.12405	3.81589	3.53928	3.49661	3.55198
YCR024C-A	7.43618	6.81127	6.74824	6.99673	7.37084	7.65102	7.52751	7.64639
YCR024C-B	4.64599	6.03682	5.89862	6.17356	6.64026	7.07442	6.93934	7.04817
YCR026C	4.53519	4.11555	4.24456	4.15084	3.97525	4.00036	4.07776	4.00632
YCR027C	4.16309	4.23807	4.19644	4.16308	4.22789	3.99855	3.93509	3.94202
YCR028C	3.09385	3.97447	3.92248	3.68065	3.76335	4.12306	4.09407	4.10832
YCR028C-A	4.2089	4.74035	4.93129	5.01652	5.23951	4.81638	4.62604	4.85097
YCR030C	4.44231	4.07281	4.05359	4.20619	3.86175	3.95402	3.95593	3.91715
YCR031C	4.99072	5.3478	5.33318	5.40176	5.31793	5.53152	5.46057	5.54679
YCR032W	3.01483	3.83594	3.76277	3.78186	3.54022	3.81401	3.88226	3.81535
YCR033W	5.17359	5.00228	5.0232	4.98771	4.8202	4.75845	4.8736	4.77019
YCR034W	3.52123	4.51107	4.55339	4.40444	4.62269	4.82301	4.60401	4.84911
YCR035C	4.73086	4.73937	4.83038	4.80759	4.71926	4.83986	4.80546	4.91011
YCR036W	4.44434	3.87124	3.93729	3.93177	4.02434	3.55164	3.47087	3.52541
YCR037C	4.44359	4.10493	3.99394	3.94835	3.93148	3.9627	4.0298	3.92823
YCR038C	2.84243	2.63891	2.40552	2.63572	2.26544	2.48729	2.35944	2.48469
YCR041W	1.17245	0.185203	0.347144	0.909696	-0.451884	0.939063	0.87581	1.63221
YCR042C	4.4077	4.63721	4.4986	4.5456	4.33114	4.5018	4.50583	4.48802
YCR043C	4.1944	4.2551	4.38381	4.32074	4.60332	4.05768	3.77653	3.97765
YCR044C	3.52472	3.78764	3.7907	3.83285	3.76245	3.6245	3.46375	3.58075
YCR046C	4.31517	2.27172	2.45633	2.18082	2.40659	2.1401	2.13518	2.19225
YCR047C	5.15958	3.44145	3.56679	3.243	3.37634	2.95996	3.08079	3.02735
YCR048W	3.46987	3.23266	3.31551	2.84179	3.0657	2.81665	2.71739	2.74244
YCR051W	4.61073	2.91952	3.11455	2.97957	3.25415	2.82662	2.66178	2.84068
YCR052W	4.89866	3.64587	3.66466	3.66635	3.61294	3.2146	3.24241	3.2261
YCR053W	4.60914	5.26633	5.14417	5.27016	5.22354	5.35925	5.37176	5.33395
YCR054C	3.04211	3.73142	3.61403	3.53921	3.37979	3.92233	3.91804	3.97175
YCR057C	4.37805	4.6492	4.50144	4.29625	4.34848	4.76058	4.85331	4.81077
YCR059C	3.79799	2.6939	2.59169	2.38866	2.78061	2.13163	1.97246	2.13188
YCR060W	4.16822	2.1567	2.13304	1.93762	2.0165	1.64683	0.865955	1.79668
YCR061W	3.88282	1.15553	1.47115	2.28086	2.50746	2.22662	2.20703	2.19934
YCR063W	4.40483	3.88073	3.97924	3.5842	3.47096	3.71818	3.66587	3.73833
YCR065W	4.68285	4.2895	4.2557	4.24379	4.23691	4.6403	4.62396	4.67574
YCR066W	3.26046	3.6667	3.51572	3.6211	3.11686	3.35761	3.21666	3.33418
YCR067C	4.23419	4.47337	4.33453	4.38773	4.23145	4.52592	4.56391	4.52843
YCR068W	4.0223	3.50507	3.63192	3.26574	3.32055	3.08773	3.00608	3.05918
YCR069W	4.63802	4.37065	4.52663	4.44234	4.43239	4.22165	4.01399	4.14254
YCR071C	5.26292	3.93052	3.81415	3.94499	4.02526	3.34725	3.07886	3.35341
YCR072C	3.29916	3.8057	4.00146	3.62702	3.56421	4.0592	3.94556	4.11559
YCR073C	2.87439	3.39091	3.47568	2.74728	2.91792	3.04532	3.1308	3.1182
YCR073W-A	3.8846	2.89764	2.92994	2.90757	2.8588	2.47156	2.32953	2.29932
YCR075C	2.86397	3.23781	3.17632	3.19693	3.15871	2.80231	2.67193	2.65127
YCR075W-A	4.23599	3.44211	3.03426	3.2836	3.70324	2.59864	2.28549	2.33364
YCR076C	3.6033	2.33764	2.19334	2.59902	2.5039	2.0385	1.33824	1.92706
YCR077C	4.80401	4.71968	4.70034	4.70127	4.71985	4.5871	4.60403	4.60414
YCR079W	4.29708	3.01777	3.02307	2.87543	2.96352	2.5041	2.28705	2.46397
YCR081W	3.03941	4.0281	3.8427	3.94493	3.76352	3.94604	3.93688	3.93898
YCR082W	5.43	4.89046	5.04587	5.13065	5.12245	4.60809	4.28555	4.65381
YCR083W	3.13237	3.48312	3.61446	3.61126	3.52213	2.69147	2.70608	2.45293
YCR084C	6.23041	4.8046	4.73493	4.77441	4.65085	4.78209	4.83438	4.80454
YCR086W	4.10125	2.91659	3.04603	3.05817	3.18245	2.27298	2.38611	2.18329
YCR087C-A	4.62376	3.32069	3.67436	3.45396	3.48457	3.34874	3.0965	3.28964
YCR088W	4.91844	4.09603	4.10565	4.25936	4.12639	3.76938	3.85935	3.74761
YCR089W	3.41923	2.97073	2.95153	3.57024	2.44572	3.52622	3.66907	3.54573
YCR090C	4.21662	3.99137	4.19104	4.00025	4.2977	3.71767	3.61633	3.72154
YCR091W	3.07833	2.66434	2.53034	3.15168	1.95594	2.34027	2.34183	2.31795
YCR092C	3.29513	3.8857	3.76051	3.73208	3.35733	3.77473	3.82054	3.77563
YCR093W	5.29599	5.50481	5.29293	5.47919	5.31645	5.48212	5.50302	5.48827
YCR094W	3.46285	3.86212	3.78363	3.7964	3.75336	3.54948	3.5629	3.53132
YCR095C	4.33053	4.2516	4.26446	4.16826	4.16941	3.9093	3.69887	3.99123
YCR095W-A	3.56227	3.94199	3.80773	3.99251	3.85969	3.57851	3.7219	3.44492
YCR098C	-0.182344	1.94714	1.6486	1.08387	0.887478	0.914988	0.764805	0.913456
YCR099C	2.78717	3.49909	3.31536	3.25344	2.88959	3.23669	2.83703	3.30944
YCR100C	2.52779	3.33154	2.90429	2.90279	2.76151	3.04312	2.95949	3.13281
YCR101C	3.18036	3.70492	3.36752	3.4754	2.90875	3.39339	3.44697	3.35943
YCR102C	5.67622	6.22275	6.70137	5.20585	6.4245	5.15286	5.14874	5.13958
YCR104W	3.11292	3.3295	3.31651	2.55704	2.30805	1.71291	1.98041	1.60358
YCR105W	0.0365361	-0.559464	-0.880524	-0.0424988	-0.537472	-0.793992	-0.818929	-1.90893
YCR106W	3.45192	4.70676	4.75604	4.55689	4.51583	4.59993	4.66298	4.60144
YCR107W	3.22189	4.43581	4.50652	4.29682	4.03043	4.29727	4.35285	4.32287
YDL001W	4.04509	3.8216	3.96485	3.80551	3.79814	3.79332	3.55982	3.78134
YDL002C	4.45876	4.58562	4.87236	4.94104	4.93336	4.65859	4.54205	4.66755
YDL003W	5.61054	4.38635	4.61066	4.66576	4.36987	4.43764	4.45394	4.39717
YDL004W	5.00764	4.83168	4.68397	5.05194	5.05529	4.80957	4.72519	4.71187
YDL005C	5.66672	4.7489	4.87045	4.96878	4.74741	4.33465	4.39573	4.38056
YDL006W	4.10689	4.21603	4.22393	4.33217	4.2312	4.26691	4.24509	4.27418
YDL007W	5.86064	5.10101	5.15351	5.2411	5.2384	4.8644	4.8369	4.88515
YDL008W	3.86119	3.24723	3.39943	3.58797	3.72858	3.21451	2.85179	3.14412
YDL010W	4.44827	3.95602	4.14818	4.06184	4.11826	3.66802	3.58954	3.58595
YDL012C	5.97878	3.88829	4.01838	4.0097	4.1392	3.382	2.92883	3.32178
YDL013W	4.72143	4.06762	3.95471	3.73587	3.58168	3.72757	3.78396	3.78777
YDL014W	5.34572	5.41694	5.43782	5.36948	5.48248	5.71952	5.60397	5.76978
YDL015C	3.80991	4.73551	4.69303	4.78009	5.05106	4.95303	4.81689	4.9087
YDL017W	2.96882	3.30159	3.26536	3.19428	3.09214	3.24706	3.11764	3.35354
YDL018C	3.90577	3.81227	3.90831	4.01373	3.99371	3.39575	3.16855	3.33554
YDL019C	4.36366	4.25927	4.16502	4.35235	4.01132	3.79481	3.81753	3.76875
YDL020C	5.68112	6.36462	6.48151	6.46754	5.84015	6.50066	6.59729	6.54081
YDL021W	3.1257	0.742482	1.38361	1.8056	2.57989	1.0959	0.938438	0.91804
YDL022W	6.08876	4.22216	4.35025	4.9568	5.27798	5.11913	5.04097	4.97545
YDL024C	0.339007	1.31934	0.835138	0.804485	0.805267	0.599494	0.462858	-0.0343026
YDL025C	5.54414	5.10479	5.21298	4.98361	5.03715	4.76333	4.80053	4.71795
YDL027C	3.88805	4.49341	4.60116	4.58437	4.51142	4.15815	4.01273	4.14236
YDL028C	4.06698	4.35342	4.30772	4.20916	4.07422	4.08905	4.17049	4.07435
YDL029W	4.71632	4.99943	5.09973	5.15252	5.35722	4.93044	4.90289	4.88169
YDL030W	3.89688	3.67482	3.65158	3.66746	3.42383	3.58786	3.67212	3.65567
YDL031W	4.50664	4.84973	4.83184	4.70725	4.74309	4.81711	4.92849	4.88402
YDL033C	3.95105	3.20975	3.38559	3.41107	3.37401	2.97655	2.94186	2.958
YDL035C	4.64799	4.62521	4.65382	4.6585	4.40619	4.39839	4.37214	4.42174
YDL036C	4.38449	4.02173	4.02508	3.90706	3.90812	3.7239	3.72684	3.67363
YDL037C	2.76249	2.8028	2.71299	2.87353	3.45603	5.27869	5.40991	5.19938
YDL039C	3.01212	2.18471	2.31738	2.0329	2.46155	4.84015	5.12545	4.81791
YDL040C	4.13457	4.62719	4.62775	4.71546	4.59263	4.68651	4.66069	4.69159
YDL042C	3.57905	2.7458	2.80375	2.62248	3.01527	3.51602	3.45389	3.52557
YDL043C	3.81744	3.93635	3.87753	3.86572	4.15034	4.02411	3.8912	4.02089
YDL044C	3.61189	3.81474	3.88469	4.01061	3.58861	3.56327	3.54038	3.61043
YDL045C	4.04572	3.95959	3.98641	4.01918	4.17387	3.74383	3.66731	3.71399
YDL045W-A	5.62691	4.42372	4.39841	4.44041	4.55687	3.70957	3.55524	3.68068
YDL046W	5.91334	4.18684	4.14644	4.16897	4.47057	4.03458	4.03621	4.03928
YDL047W	5.30927	4.63614	4.62846	4.62293	4.54602	4.54429	4.50732	4.49991
YDL048C	4.09147	0.450077	0.761338	2.5558	1.66185	3.24422	3.36434	3.10715
YDL049C	2.69707	1.69839	2.02137	1.40275	2.28504	2.14547	1.32287	1.99651
YDL051W	4.88571	4.70295	4.74216	4.73347	4.85941	4.93977	4.74993	4.99774
YDL052C	5.14748	3.6626	3.74124	3.73774	3.87493	3.62859	3.58949	3.59671
YDL053C	5.00142	5.01753	5.06255	5.18501	5.19474	4.47719	4.49818	4.5306
YDL054C	3.21911	3.33681	3.13806	3.33559	3.19774	3.19088	3.02701	3.11265
YDL055C	5.63368	6.25436	6.35485	6.45594	6.71345	6.63044	6.6798	6.56351
YDL056W	4.7782	4.49463	4.43643	4.48029	4.1797	4.22317	4.25081	4.23922
YDL057W	3.16062	2.63101	2.56492	2.45682	2.58979	2.30601	2.00616	2.00844
YDL058W	4.29586	4.77203	4.71267	4.88916	4.53931	4.42541	4.52885	4.44537
YDL059C	3.62223	3.30046	3.20468	4.2363	3.27724	2.72926	2.71728	2.83037
YDL060W	4.29866	4.29636	4.44414	4.28023	4.16004	4.62438	4.67663	4.6495
YDL061C	6.54341	6.06022	6.23482	6.23408	6.21464	6.64737	6.38255	6.67068
YDL063C	3.01235	4.53551	4.46308	3.98178	4.24342	4.81125	4.81569	4.90266
YDL064W	4.5424	3.55637	3.60743	3.70565	3.57937	3.20371	3.20265	3.21351
YDL065C	5.20838	4.88699	4.82942	5.01196	4.68628	4.27003	4.1593	4.337
YDL066W	4.3638	4.90442	5.18633	4.81283	4.9419	4.58468	4.55725	4.57261
YDL067C	5.46098	5.04822	4.89657	5.02653	5.1189	4.55157	4.37235	4.46224
YDL069C	3.02186	3.68866	3.94598	3.91973	3.73312	3.61102	3.28928	3.67334
YDL070W	6.14166	4.97684	5.1248	5.30579	5.60676	5.4788	5.65665	5.43245
YDL072C	4.2402	4.60716	4.64706	4.69791	4.83535	4.41747	4.31925	4.35216
YDL073W	3.50876	4.62588	4.62827	4.49857	4.31354	4.55037	4.57067	4.56088
YDL074C	4.63266	5.41367	5.47573	5.49701	5.33454	5.33644	5.37722	5.378
YDL075W	5.45349	4.97287	5.17074	5.10623	5.20081	5.23024	5.11717	5.25142
YDL076C	4.78027	3.96192	4.17753	4.14364	4.03897	3.57988	3.31744	3.59345
YDL077C	2.93856	3.82534	3.65368	3.70413	3.39644	3.78398	3.6908	3.80186
YDL078C	3.83904	3.62358	3.61645	3.7015	3.59161	3.43018	3.227	3.39582
YDL079C	2.15525	0.229836	0.275335	0.939486	0.4936	0.930518	0.712231	0.857643
YDL080C	3.5906	3.5127	3.46734	3.45747	2.98403	3.36786	3.29937	3.38165
YDL081C	5.78546	6.56872	6.55161	6.55971	6.71814	6.52035	6.45229	6.55027
YDL082W	4.82723	5.26143	5.39993	5.49305	5.37384	5.55093	5.43507	5.56471
YDL083C	4.76352	4.83787	4.92174	5.02452	4.95449	5.3096	5.12728	5.31161
YDL084W	5.05524	5.6743	5.61039	5.76674	5.82666	5.75987	5.74843	5.77386
YDL085C-A	5.01606	4.32704	5.02548	4.9569	4.66834	3.51465	3.52739	3.56931
YDL085W	0.995373	-0.68216	-0.368306	0.0412366	-0.963876	-1.02687	-1.22878	-0.66706
YDL086W	4.0083	3.36129	3.18413	3.16445	3.37624	2.50918	2.60917	2.47367
YDL087C	4.3356	3.32894	3.48286	3.28722	3.22076	2.82145	2.83642	2.80536
YDL088C	5.32842	4.81195	4.89407	4.92139	4.35539	4.71854	4.70076	4.75177
YDL089W	2.7906	3.51324	3.27651	3.67067	3.50679	3.40661	3.39855	3.38754
YDL090C	3.04455	3.19167	3.14526	3.4426	3.31553	3.18914	3.04641	3.27416
YDL091C	3.81786	3.89744	3.83207	4.00589	3.42949	3.32133	3.40784	3.32274
YDL092W	5.36552	4.35442	4.32326	4.29045	4.68066	3.95681	3.82028	3.9775
YDL093W	2.83302	3.42004	3.55689	3.29205	3.36518	3.38468	3.5115	3.42205
YDL095W	4.34057	4.40554	4.50349	4.43434	4.56078	4.52706	4.60642	4.52066
YDL097C	5.66898	5.33947	5.38237	5.49297	5.4579	5.13314	5.04309	5.12151
YDL098C	4.00983	3.62848	3.70308	3.86371	3.84784	3.17492	2.8118	3.23732
YDL099W	6.06534	4.79078	4.93093	5.06567	4.94675	4.13224	4.02467	4.24282
YDL100C	4.51686	4.81836	4.87784	5.07714	4.94325	4.70691	4.62779	4.70711
YDL101C	3.83184	4.01834	3.91205	4.12824	4.025	3.62978	3.65539	3.59652
YDL102W	3.26185	4.03224	3.86664	3.79698	3.79596	3.9478	3.94705	3.98682
YDL103C	3.68147	3.95451	3.88429	4.01644	3.85259	3.62912	3.63858	3.57591
YDL104C	2.49529	3.34771	3.32438	3.30713	3.09936	2.79476	2.74123	2.81671
YDL105W	3.2266	3.74128	3.72984	3.45441	3.40204	3.37621	3.41684	3.45388
YDL106C	5.44696	4.88455	4.90241	4.78192	4.60011	4.44371	4.40226	4.47272
YDL107W	3.68038	3.4616	3.28082	3.43689	3.3442	2.91781	2.96198	2.85363
YDL108W	3.50671	3.14567	3.07672	3.15306	3.07801	2.98815	2.83513	2.97594
YDL109C	2.96935	2.58202	2.53973	2.33624	2.04503	2.70939	2.68665	2.66525
YDL110C	5.63722	3.70113	4.21292	4.44307	4.71041	3.54514	3.66741	3.56998
YDL111C	4.25916	4.60092	4.61253	4.70022	4.61042	4.65911	4.5036	4.67161
YDL112W	3.79124	4.63241	4.5112	4.50575	4.28684	4.57487	4.64523	4.61487
YDL113C	4.01932	4.04214	4.15307	4.11799	3.8658	3.75934	3.7524	3.77536
YDL114W	-3.14348	-2.12792	-1.42193	-2.17241	-1.50039	-1.64456	-0.663335	-0.951414
YDL115C	4.61697	4.39408	4.3257	4.21381	4.23637	3.68433	3.7539	3.64949
YDL116W	4.73759	5.04996	4.96861	4.96144	4.84387	4.97359	5.0293	4.97853
YDL117W	3.95138	4.23549	4.25337	4.18234	4.04797	4.44996	4.46333	4.48806
YDL119C	3.54696	2.81407	2.73415	2.76093	2.61281	2.38189	2.13522	2.38197
YDL120W	3.93584	4.0678	3.9782	4.01037	3.91871	3.59743	3.56355	3.62229
YDL121C	4.40499	4.72636	5.04274	4.85613	4.96494	3.9687	4.09369	3.9587
YDL122W	4.58848	4.89807	4.92115	4.97968	4.83669	5.16292	5.19442	5.18159
YDL123W	4.93144	3.49406	3.66396	3.35339	3.40985	3.69474	3.43311	3.81948
YDL124W	6.69847	6.10749	6.80454	6.58204	6.88382	6.20972	6.19218	6.18562
YDL125C	5.07255	4.66625	5.28426	5.13757	5.24716	4.86468	4.73651	4.85412
YDL126C	5.77674	5.6388	5.601	5.57754	5.6182	5.43991	5.44824	5.43568
YDL127W	3.70802	3.63522	3.66848	3.84335	3.40012	3.84003	3.95744	3.81817
YDL128W	4.06732	4.02728	3.95321	4.04734	4.26526	4.30253	4.10715	4.26912
YDL129W	3.54081	3.64439	3.90863	3.73059	3.00942	3.61665	3.6341	3.6688
YDL130W	4.66203	5.44171	5.41319	5.37839	5.6388	5.57213	5.39413	5.51113
YDL130W-A	5.82824	3.40964	3.90307	4.6018	4.10071	3.03103	2.84367	2.66512
YDL131W	4.10264	3.86504	4.18857	4.01443	4.17567	3.93698	4.00697	3.90182
YDL132W	4.57245	4.98106	5.05198	5.09155	4.88136	4.74256	4.80912	4.75821
YDL133C-A	6.41793	7.28285	7.83298	7.70943	7.52902	7.32248	7.29311	7.31218
YDL133W	4.09356	4.32654	4.38998	4.13659	4.06719	4.0446	4.05864	4.03041
YDL134C	4.44202	4.92697	4.90909	5.02401	4.83937	4.83209	4.80982	4.79051
YDL135C	4.21428	4.43408	4.55087	4.66684	4.58169	3.9772	3.89198	3.96605
YDL136W	4.54267	4.62265	5.01673	5.02517	4.99209	4.75715	4.61878	4.78089
YDL137W	5.34854	5.3571	5.5945	5.51184	5.72033	5.00093	4.893	5.01081
YDL138W	4.16884	3.10854	3.23149	2.91863	3.07359	2.98616	2.92178	3.04814
YDL139C	4.27663	3.49531	3.73384	3.68111	3.62961	2.64151	2.56976	2.5232
YDL140C	5.5721	5.17836	5.03876	5.14672	5.01772	5.35907	5.40479	5.37188
YDL141W	3.4044	3.92951	3.89062	3.85651	3.75045	3.88217	3.89485	3.95203
YDL142C	3.80105	3.24231	3.32648	3.2568	3.23102	2.90982	2.86805	2.80655
YDL143W	4.43165	4.94092	4.87207	4.99071	4.98058	5.05329	5.06909	5.08194
YDL144C	4.37242	2.44232	2.2635	2.36093	2.57206	2.01799	2.00812	1.98338
YDL145C	4.82144	5.25773	5.02824	5.14076	5.06609	5.12963	5.17543	5.12881
YDL146W	2.87368	3.95039	4.04671	3.98024	4.03103	3.82545	3.70433	3.76066
YDL147W	5.82168	5.83195	6.01205	6.10399	6.12381	5.80845	5.75884	5.84587
YDL148C	4.58961	4.97239	5.00793	4.85445	4.82569	5.09738	5.24027	5.15046
YDL149W	2.93968	3.62264	3.53068	3.76194	3.3879	3.16523	3.18961	3.11245
YDL150W	4.63098	4.17628	4.38463	4.21253	3.86916	4.25445	4.34748	4.30993
YDL153C	4.9292	4.776	4.80816	4.60857	4.72992	4.83196	4.95462	4.88492
YDL154W	1.66452	2.45798	2.0733	2.99016	1.79754	2.7374	2.67369	2.75965
YDL155W	4.4913	4.75567	4.84326	4.78128	4.529	4.69859	4.72331	4.66412
YDL156W	4.28338	3.93804	3.97558	3.79314	3.55151	3.52532	3.55728	3.43394
YDL157C	2.87014	3.99946	3.88891	3.82697	4.10964	3.53126	3.29042	3.51277
YDL159W	3.88704	3.77528	3.86961	3.65692	3.48605	3.43245	3.22428	3.48709
YDL160C	5.19426	5.34565	5.22041	5.36675	5.27128	5.37515	5.3954	5.3592
YDL160C-A	4.33601	3.96612	4.10588	4.29296	4.01223	3.34538	3.36613	3.3934
YDL161W	6.12414	4.82473	5.15295	5.01792	4.7508	4.30162	4.31766	4.35797
YDL164C	3.85476	3.74914	3.76188	3.7716	3.73347	3.7125	3.72513	3.64131
YDL165W	3.96503	3.55076	3.7541	3.67938	3.74867	3.32135	3.27083	3.2743
YDL166C	3.97951	4.22672	4.50679	4.38577	4.54292	4.0061	3.85058	4.07227
YDL167C	4.69946	4.39878	4.42595	4.35264	4.09495	4.67067	4.67014	4.71706
YDL168W	5.6602	5.44634	5.72827	5.50147	5.86102	5.53894	5.48848	5.56311
YDL169C	3.18147	1.80529	2.01203	2.67888	2.41795	0.949581	0.959618	0.805423
YDL170W	3.60616	4.16193	4.30955	3.8686	4.21885	4.17352	4.17779	4.17151
YDL171C	3.93963	4.53847	4.37657	4.60264	4.33535	4.79816	4.74697	4.83148
YDL173W	5.62965	4.37837	4.35021	4.25419	4.42534	3.49281	3.4714	3.39337
YDL174C	3.66717	3.36854	3.19918	3.33051	3.24339	3.27426	3.27319	3.26273
YDL175C	2.99369	3.25299	3.20293	3.18725	2.8058	2.99816	2.87514	2.94716
YDL176W	3.56226	3.8056	3.80356	3.61735	3.41383	3.81796	3.92979	3.83489
YDL177C	4.76699	3.70143	3.88712	3.87004	3.89818	3.22585	3.05264	3.30952
YDL178W	4.14886	3.93925	4.03998	4.20023	4.10121	3.90746	3.98251	3.85522
YDL179W	4.69275	4.04418	4.09682	3.92056	3.74924	4.06933	4.04955	4.07399
YDL180W	4.77239	5.03874	5.11155	5.05731	4.85846	5.09918	5.16752	5.1403
YDL181W	3.90529	2.33184	2.58748	3.48596	3.01401	3.55075	3.18639	3.29538
YDL182W	5.16499	5.72738	6.1677	5.22696	5.86533	5.50841	5.67191	5.46687
YDL183C	3.06595	3.24584	3.53972	3.2571	3.10798	3.16294	3.08513	3.21191
YDL184C	5.8918	7.56067	7.72189	7.60896	7.62691	7.22137	7.05981	7.24441
YDL185W	4.63287	5.41842	5.36002	5.34718	5.56003	5.64314	5.68654	5.62242
YDL188C	4.54694	4.39764	4.29725	4.5236	4.20425	4.1919	4.1656	4.16199
YDL189W	4.42711	4.12196	4.28798	4.322	4.08504	3.95508	4.02652	3.9891
YDL190C	4.49945	4.87679	4.72623	4.78158	4.62248	4.69336	4.67493	4.66947
YDL191W	5.08216	4.79546	5.06456	5.01268	4.92718	4.95642	4.77265	4.997
YDL192W	4.96345	5.81573	6.03575	5.99111	6.31538	5.81566	5.71303	5.77886
YDL193W	3.24544	4.01802	4.15241	4.24382	4.03437	4.02289	4.00493	3.97795
YDL194W	2.79751	2.80864	2.68088	2.80749	2.5278	2.89132	2.93016	2.96275
YDL195W	5.57797	4.94433	4.85844	5.03815	4.77524	4.94264	4.97173	4.902
YDL197C	4.20221	3.57601	3.59981	3.6788	3.44609	3.16693	3.23764	3.22818
YDL198C	4.1379	4.27003	4.53536	4.65364	4.56795	4.6059	4.44272	4.61081
YDL199C	2.74405	2.69536	2.65287	2.75928	2.50665	2.20151	2.25178	2.16932
YDL200C	3.92586	3.12622	3.68825	3.40228	3.22251	2.7424	2.53891	2.57795
YDL201W	4.42764	3.94398	4.24448	4.16679	4.03857	4.02186	4.10722	4.03267
YDL202W	4.31499	4.23357	4.28061	4.33821	4.27161	3.97578	3.80423	4.06281
YDL203C	4.05728	3.74657	3.68573	3.56995	3.40604	3.52092	3.43418	3.57448
YDL204W	3.68048	2.81409	3.48698	3.4857	3.18148	3.23997	3.31582	3.23479
YDL205C	5.32607	4.70384	4.93906	4.90965	4.66929	4.9098	4.94197	4.90503
YDL206W	2.65536	3.0635	2.80969	3.1465	2.73714	2.99469	2.91553	3.03077
YDL207W	4.62044	4.43742	4.64376	4.55689	4.38596	4.07244	4.08036	4.08341
YDL208W	4.97473	5.2518	5.48045	5.55505	5.55066	5.32418	5.14276	5.36388
YDL209C	4.18542	3.9851	3.91894	3.68597	3.71265	3.89687	3.65001	3.93448
YDL210W	-0.240732	-0.441744	-0.569981	-0.320534	-1.41209	-0.388062	0.188032	-0.374085
YDL211C	4.08701	3.25203	3.21302	3.19203	2.78868	2.9703	2.87231	3.02344
YDL212W	3.95344	4.64807	4.59253	4.59178	4.78359	4.31976	4.3419	4.30773
YDL213C	5.33927	4.21122	4.41378	4.32274	4.34849	3.93387	3.86677	4.03293
YDL214C	0.863804	0.184004	0.394093	0.801048	0.326885	0.821628	0.754373	0.86192
YDL215C	2.78412	4.12561	4.03488	4.04684	4.01807	4.13193	4.13546	4.12985
YDL216C	4.08653	3.44182	3.41333	3.57076	3.17118	3.01299	3.03756	3.1679
YDL217C	4.62917	4.25075	4.44797	4.17939	4.2833	3.91713	3.88335	3.90588
YDL218W	1.15176	2.02953	2.1005	1.41422	2.00667	1.45113	1.61395	1.36137
YDL219W	3.54848	3.61916	3.76534	3.88893	3.98687	3.22667	3.12901	3.22365
YDL220C	3.40884	3.28767	3.24816	3.13342	2.98049	3.03375	3.16437	3.00614
YDL222C	2.36704	0.467336	0.972535	0.852945	1.0754	1.0945	1.00983	1.08638
YDL223C	2.76571	2.49792	2.4853	2.38794	1.82317	1.92483	1.98936	1.95919
YDL224C	5.28931	4.80138	4.63578	4.66524	4.46045	4.74313	4.81011	4.72103
YDL225W	5.23173	4.80918	4.91732	4.93124	4.84638	4.44519	4.50438	4.43904
YDL226C	4.94949	4.72613	4.67713	4.606	4.64306	4.20911	4.22992	4.21861
YDL227C	4.76115	4.04762	3.97962	4.08536	4.07283	4.43273	4.2827	4.32357
YDL229W	4.90742	5.71553	5.63574	5.69224	5.76945	6.3307	6.31827	6.37983
YDL230W	4.19035	2.91726	3.0199	2.70395	3.03215	2.11271	1.96373	1.94259
YDL231C	3.66237	4.2129	4.01876	3.9604	3.94447	4.28506	4.3609	4.31352
YDL232W	5.57996	5.75803	5.83002	6.04534	6.03224	5.58055	5.42029	5.62426
YDL233W	3.86564	3.5001	3.33078	3.44282	3.35632	3.3271	3.25128	3.33207
YDL234C	4.2027	4.03515	3.9313	4.01195	3.91744	3.78959	3.92793	3.80621
YDL235C	5.06215	4.95517	5.20631	5.26516	5.33311	4.79345	4.67025	4.80837
YDL236W	3.95158	4.31545	4.21413	4.38741	4.46962	4.22953	4.10758	4.21211
YDL237W	3.50714	3.58612	3.38159	3.70872	3.70157	3.56149	3.48107	3.50174
YDL238C	3.09595	3.22076	2.86198	3.08096	2.81342	2.79288	2.72109	2.6879
YDL239C	2.36391	3.20244	3.1521	3.6004	2.88427	3.0101	3.12889	2.97989
YDL240W	3.95869	4.49074	4.38958	4.53306	4.25666	4.57697	4.60937	4.60396
YDL241W	2.42249	2.7724	2.7174	2.68114	2.60094	2.53579	2.41248	2.4182
YDL243C	5.28628	5.7859	6.05998	5.19916	5.69559	4.89743	4.99417	4.8451
YDL248W	0.869285	2.94533	2.71762	2.96318	2.68898	2.41463	2.31371	2.43771
YDR001C	4.72646	4.33247	4.43327	4.69032	4.56873	4.13858	4.19232	4.11305
YDR002W	4.90317	5.53965	5.97622	6.05314	6.14117	5.63817	5.543	5.63017
YDR003W	4.98889	4.62155	4.7501	4.65951	4.86905	4.22227	4.20581	4.1813
YDR003W-A	4.66212	5.23528	5.68535	5.42063	5.5487	5.41799	5.3234	5.39333
YDR004W	3.94599	3.91234	4.03474	4.03129	3.93939	3.61422	3.70891	3.64881
YDR005C	4.04617	4.63267	4.50809	4.61002	4.70867	4.50934	4.39272	4.54366
YDR006C	5.2493	4.58464	4.72451	4.54639	4.24887	4.68924	4.66117	4.74763
YDR009W	1.2977	1.55041	1.43938	1.33652	1.03111	1.02315	0.488869	1.01044
YDR011W	6.33699	7.00373	6.94772	6.86926	7.03112	7.26112	7.40212	7.25203
YDR012W	4.13931	4.34533	4.35859	4.22578	4.11752	4.48443	4.36718	4.50057
YDR013W	2.49423	3.78255	3.78324	4.00857	3.87657	3.52493	3.58722	3.47937
YDR014W	3.25332	3.72051	3.67551	3.61192	3.30504	3.45292	3.52733	3.49986
YDR016C	4.44138	4.03874	4.21523	4.14384	4.57611	3.56784	3.22814	3.52419
YDR017C	4.03753	4.3463	4.36063	4.33717	4.18484	4.61568	4.62469	4.63328
YDR018C	0.725443	0.620083	0.834885	0.77518	0.659155	0.216528	-0.911303	-0.587463
YDR019C	4.77706	3.51765	3.91368	3.91566	3.99226	3.4901	3.30265	3.45232
YDR020C	3.81915	4.0124	4.20438	4.05685	3.68883	3.95689	4.01572	3.97771
YDR021W	3.39849	3.79785	3.89804	3.49613	3.55836	3.87327	3.92435	3.93011
YDR022C	3.10586	2.68064	2.85965	2.98261	3.10513	2.44263	1.82654	2.5695
YDR023W	4.87922	5.33732	5.37396	5.41342	5.44504	5.47933	5.48073	5.49685
YDR025W	5.57365	4.7513	4.79681	4.83079	4.88106	5.13738	5.07638	5.14719
YDR026C	4.43634	4.26811	4.3975	4.36374	3.96484	4.10425	4.24047	4.11446
YDR027C	4.95155	4.62297	4.60624	4.64114	4.5113	4.34031	4.3746	4.35365
YDR028C	4.87749	5.091	5.10097	5.17984	4.88735	4.77264	4.89495	4.77168
YDR030C	2.82138	2.56448	2.98594	2.4062	2.24809	2.41931	2.35967	2.53423
YDR031W	2.94287	3.3984	3.97708	4.05762	4.20664	2.97171	3.06269	2.91577
YDR032C	4.59121	4.68664	5.62365	4.88959	5.44938	4.3002	4.22266	4.26095
YDR033W	4.7892	4.9984	5.52964	6.30626	6.4917	6.865	6.89585	6.78788
YDR034C	4.56004	4.57344	4.62689	4.47311	4.35011	4.60195	4.62222	4.61022
YDR035W	5.13007	5.13859	5.27675	5.29368	5.20159	5.09535	5.12865	5.07072
YDR036C	3.81411	3.98161	4.21543	4.12706	4.03703	4.032	4.0221	4.04092
YDR037W	5.85295	5.72287	5.89615	5.86752	5.90029	6.16776	6.17884	6.15326
YDR038C	0.942526	1.06634	1.03493	0.915751	0.830114	1.08645	1.05472	1.18968
YDR040C	1.66823	0.725173	1.081	0.340053	0.884248	0.532452	0.714367	0.647306
YDR041W	5.03098	4.35034	4.66827	4.60927	4.49158	4.03004	3.76823	4.03156
YDR042C	0.788969	1.90193	2.72212	1.86664	2.34136	1.7567	1.76147	1.81588
YDR043C	4.21994	3.75413	4.63073	4.42307	4.45762	3.75856	3.84594	3.76139
YDR044W	3.54491	3.14411	3.21884	3.31862	2.75357	3.04497	3.11182	3.08899
YDR045C	4.04058	4.49725	4.78671	4.77148	4.72349	4.59757	4.14073	4.727
YDR046C	5.49288	4.9479	5.16459	5.26761	5.37961	5.86641	5.92068	5.87235
YDR047W	4.12421	3.95394	4.07361	4.12149	4.11738	4.15575	4.11692	4.10148
YDR049W	4.29027	4.2199	4.22266	4.24893	3.89051	3.98037	4.00404	3.97822
YDR050C	6.55623	6.75364	6.66603	6.58325	7.18463	6.72036	6.67146	6.63807
YDR051C	4.73268	4.22228	4.46682	4.40946	4.35006	4.06649	3.85277	4.11578
YDR052C	4.94904	4.94251	4.94019	4.98105	4.72556	4.63138	4.73078	4.66789
YDR054C	5.75483	5.39997	5.65533	5.49573	5.48783	5.17925	5.05175	5.20236
YDR055W	5.41846	4.63445	4.74685	4.55083	4.55601	4.71866	4.74353	4.65569
YDR056C	4.61254	4.28994	4.32732	4.3154	4.44138	4.04311	3.95456	4.0321
YDR057W	3.78197	3.77169	3.83533	3.76051	3.7581	3.64618	3.62388	3.66364
YDR058C	2.82333	2.95877	2.91577	2.94078	2.87528	2.44466	2.07583	2.35199
YDR059C	4.06437	3.21786	3.37135	3.37809	3.64509	2.93387	2.54839	3.06389
YDR060W	4.89715	5.31064	5.37139	5.31797	5.21756	5.49655	5.55554	5.54549
YDR061W	4.14876	4.11395	4.11927	3.96472	4.04082	3.70673	3.70026	3.74846
YDR062W	4.59305	4.95074	4.85852	4.91589	4.99544	5.20129	5.1811	5.22241
YDR063W	4.65539	4.06427	4.42538	4.64177	4.39898	3.85013	3.66469	3.91054
YDR064W	4.05719	5.47307	5.31716	5.3287	5.1009	5.66933	5.57813	5.68975
YDR065W	3.09992	3.72756	3.70213	3.92929	3.23015	3.54725	3.51742	3.60758
YDR066C	2.41075	2.65888	2.67948	2.8207	2.39028	2.58459	2.54097	2.62584
YDR067C	4.30779	4.03365	4.28491	4.08689	4.14671	3.82217	3.90965	3.84611
YDR068W	5.44281	4.5965	4.83016	4.86512	4.78129	4.04533	4.05669	4.05616
YDR069C	4.3282	4.78966	5.01602	4.91373	4.78777	4.76281	4.79597	4.78614
YDR070C	2.60098	1.46854	2.02959	2.60384	2.01071	1.09073	0.128017	1.11637
YDR071C	5.20706	5.50024	5.68796	5.8245	5.76547	5.17164	5.02468	5.18532
YDR072C	3.82738	3.92485	4.11415	4.09687	4.12715	4.79956	4.72607	4.79372
YDR073W	4.36052	3.71924	3.94108	3.98285	3.91183	3.65363	3.63486	3.55874
YDR074W	5.30319	4.69042	4.80806	5.21463	5.05743	4.82004	4.79922	4.75514
YDR075W	4.42811	4.30138	4.38416	4.25987	4.16059	4.24527	4.16429	4.29134
YDR076W	3.06941	3.46995	3.85282	3.41735	3.30993	3.29524	3.36721	3.36869
YDR077W	8.23552	5.07061	4.88472	5.26334	5.23652	5.37013	5.45825	5.25385
YDR078C	1.90439	2.8988	3.04012	2.96235	2.3622	2.65032	2.67265	2.64945
YDR079C-A	4.10236	3.00456	3.32663	3.41638	3.42531	2.9763	2.68167	2.77699
YDR079W	4.49759	4.21805	4.20515	4.5076	4.47075	3.64834	3.51881	3.76751
YDR080W	3.84751	3.99551	3.95314	3.84294	3.79395	3.70157	3.7861	3.71298
YDR081C	4.30351	4.58736	4.61295	4.51928	4.28063	4.49459	4.54018	4.53562
YDR082W	3.43536	3.63217	3.82903	3.59799	3.51566	3.60627	3.51788	3.66429
YDR083W	4.86232	4.55993	4.7247	4.4923	4.55602	4.49797	4.52722	4.57308
YDR084C	4.09583	4.12003	4.03892	4.23644	4.0482	3.56337	3.4713	3.57322
YDR085C	2.91623	2.49248	2.55759	3.22243	2.44449	2.70045	2.62317	2.562
YDR086C	6.5407	5.70343	6.00577	6.11482	6.05311	5.50833	5.29914	5.51982
YDR087C	4.31667	4.39293	4.52955	4.36883	4.64084	4.19176	4.23375	4.28923
YDR088C	4.70356	4.18248	4.20818	4.22065	4.02924	3.72679	3.71921	3.81807
YDR089W	3.68369	3.4416	3.81083	4.12657	3.88067	4.317	4.34666	4.28188
YDR090C	3.46144	4.11745	4.23362	3.93722	4.04671	3.98756	3.73503	3.96255
YDR091C	3.41418	5.0221	5.02456	5.134	5.02999	5.55689	5.55433	5.57153
YDR092W	4.77311	3.75349	4.03577	3.97645	4.07321	3.21331	3.15281	3.36337
YDR093W	4.00114	4.19428	4.18317	4.35405	4.29392	4.51342	4.54538	4.48753
YDR096W	4.42914	4.17615	3.90141	4.52175	4.00539	4.23599	4.17941	4.19025
YDR097C	4.08556	3.78107	3.76324	3.84315	3.81929	3.80339	3.86036	3.82572
YDR098C	5.27953	4.20589	4.37996	4.25155	4.68511	3.96148	3.80483	3.96188
YDR099W	5.71149	5.87108	5.94564	6.13118	6.0505	5.63788	5.63534	5.61323
YDR100W	4.90184	4.0261	3.79481	4.1099	4.26696	3.5662	3.25408	3.58814
YDR101C	4.49629	4.604	4.47851	4.2008	4.55768	4.97226	4.92019	5.02398
YDR103W	4.29873	4.01759	4.06047	4.12015	3.95434	4.46608	4.44979	4.44079
YDR104C	3.24437	3.55045	3.48907	3.44618	3.22923	3.25875	3.32203	3.25566
YDR105C	3.31405	3.556	3.44051	3.50992	3.45873	3.41855	3.24993	3.39795
YDR106W	1.61915	0.825832	0.776331	1.48022	1.29777	0.884168	0.266135	0.576158
YDR107C	2.63472	3.41723	3.33408	3.3448	3.3197	3.26239	3.25768	3.23046
YDR108W	3.12632	3.84454	3.78278	3.71991	3.6195	3.80691	3.86107	3.82855
YDR109C	3.54423	3.54874	3.6888	3.4852	3.34923	3.33164	3.4006	3.2925
YDR110W	3.92817	3.51034	3.67822	3.40563	3.22921	3.49814	3.55406	3.58741
YDR111C	3.86217	4.11962	4.03339	3.82383	3.82491	3.98772	3.981	4.00799
YDR113C	4.6009	3.7828	3.93153	3.88043	3.86433	3.49915	3.64806	3.50737
YDR115W	4.57412	4.13123	4.10699	3.86289	4.1063	3.31417	3.22411	3.41612
YDR116C	4.82454	4.48298	4.57682	4.64502	4.4739	4.09159	3.99441	4.09348
YDR117C	4.11263	4.20332	4.20997	4.31142	4.17454	4.03496	4.09121	4.05464
YDR118W	2.79085	3.12947	3.21149	3.15698	2.96169	3.14202	3.1404	3.12822
YDR119W	3.53423	4.06726	4.09365	4.29564	3.93844	4.42606	4.42713	4.44129
YDR120C	4.17494	4.43785	4.43894	4.29937	4.32343	4.36069	4.26417	4.41072
YDR121W	4.80806	4.25762	4.33558	4.27541	4.2029	3.91187	3.81469	4.01538
YDR122W	4.58837	4.32022	4.35789	4.49816	4.15794	4.22342	4.23667	4.22966
YDR123C	4.85129	3.91593	4.40893	3.31692	3.58042	3.26802	3.33466	3.22024
YDR124W	2.69882	1.30285	2.05894	1.89144	1.92697	1.88072	1.80006	1.68563
YDR125C	2.38283	2.97916	2.97447	3.14544	2.7516	2.69331	2.67594	2.78713
YDR126W	2.19337	2.21276	2.411	2.38582	1.9197	2.44615	2.31205	2.50388
YDR127W	4.14811	5.06602	5.01103	4.98427	4.81983	4.9328	4.99723	4.9036
YDR128W	3.85901	3.93731	3.96845	3.72729	3.71692	3.73859	3.69689	3.77114
YDR129C	4.90945	4.77256	4.77982	4.61289	4.81299	4.55317	4.54609	4.57824
YDR130C	4.35329	4.10267	4.25174	4.28241	4.12058	3.78121	3.67666	3.7684
YDR131C	3.29367	3.4086	3.36448	3.33012	3.15265	3.19823	3.13126	3.17669
YDR132C	5.32723	5.9258	6.04815	5.67378	5.9386	5.89572	5.99075	5.9024
YDR135C	5.73829	6.14333	6.2766	6.02321	6.17723	6.21913	6.29758	6.22746
YDR137W	3.87225	4.18783	4.13768	4.24318	3.91904	4.02795	3.98046	4.04122
YDR138W	3.80793	4.45775	4.47388	4.48537	4.25026	4.47081	4.50344	4.48286
YDR139C	5.28708	3.71576	3.9679	4.0517	4.01462	3.04298	2.68	3.33571
YDR140W	4.48057	4.09333	4.01707	4.01763	3.89317	3.66085	3.4539	3.65397
YDR141C	3.93006	4.62375	4.42372	4.4261	4.35441	4.36895	4.39583	4.36742
YDR142C	3.72409	3.89547	3.74142	3.80664	3.50833	3.57958	3.54894	3.49436
YDR143C	4.78817	4.28156	4.26499	4.22695	3.65222	4.13287	4.20978	4.13812
YDR144C	3.95648	4.10963	4.03248	4.16835	3.76242	4.12648	3.98482	4.14352
YDR145W	5.70919	4.91158	4.9892	5.07479	4.77731	4.44184	4.32144	4.50396
YDR146C	4.75066	4.54294	4.53649	4.5774	4.54197	4.41854	4.39607	4.45217
YDR147W	3.61134	3.83182	4.15018	3.68728	3.80037	3.55933	3.53141	3.52772
YDR148C	3.70293	3.80131	3.71927	4.04137	3.82246	4.02215	4.02604	3.98283
YDR150W	4.35194	4.60994	4.5572	4.58269	4.46614	4.32792	4.45743	4.30851
YDR151C	5.0978	5.35709	5.30899	5.5177	4.94774	4.96638	4.83329	4.96009
YDR152W	5.43231	4.89199	5.20261	5.00856	5.02573	4.68303	4.63257	4.7398
YDR153C	5.27502	5.02928	5.15712	5.05086	4.93284	4.73037	4.73231	4.73875
YDR155C	5.84684	5.76759	5.98297	6.11466	6.085	5.42365	5.33624	5.37246
YDR156W	4.99238	3.98927	4.05348	4.08638	4.17016	3.75769	3.62205	3.67561
YDR158W	4.07157	4.9869	5.00808	5.22089	5.36365	5.36475	5.29369	5.36484
YDR159W	4.26249	4.43795	4.40021	4.431	4.15094	4.27482	4.39799	4.29023
YDR160W	3.75924	3.45964	3.33302	3.25273	3.19281	3.43132	3.40596	3.42017
YDR161W	3.94061	4.36161	4.44396	4.30051	4.35836	4.37009	4.30001	4.43642
YDR162C	5.30795	4.52781	4.74541	4.66867	4.46664	4.19876	3.94846	4.25129
YDR163W	5.82815	3.87615	4.19163	3.91308	3.7641	2.95872	2.75562	2.97757
YDR164C	3.74019	4.12212	4.13055	4.07155	3.91828	3.9888	4.01747	3.94935
YDR165W	4.31892	4.58452	4.681	4.6392	4.49378	4.85623	4.7876	4.89841
YDR166C	3.97292	4.59393	4.46909	4.55464	4.42322	4.43977	4.47925	4.46748
YDR167W	5.05409	4.20635	4.43317	4.39728	4.35379	3.85234	3.60425	3.92568
YDR168W	5.25561	4.88748	4.91057	5.00639	4.99436	4.59295	4.56889	4.60091
YDR169C	5.63797	4.59879	4.7693	4.69623	4.5893	4.20286	4.30904	4.18643
YDR169C-A	2.15467	2.50257	2.49567	2.8617	2.12975	2.30643	2.14604	1.92257
YDR170C	4.47793	4.91554	4.7782	4.87992	4.78929	4.81767	4.87292	4.82637
YDR171W	6.69522	5.9245	5.70615	6.47447	6.08398	4.96366	4.90603	4.89626
YDR172W	5.34647	5.25217	5.35731	5.43938	5.32228	5.36011	5.38768	5.39416
YDR173C	2.75457	2.58645	2.75061	3.02404	2.94603	2.93985	2.88611	2.93373
YDR174W	4.93282	5.08604	5.23293	5.18874	5.13761	5.06089	5.02426	5.03978
YDR175C	4.43504	4.2653	4.32677	4.29431	4.18259	4.01776	3.94849	3.99176
YDR176W	5.02612	4.70564	4.86856	4.79044	4.5321	4.30869	4.359	4.30988
YDR177W	4.80887	4.42223	4.69545	4.7163	4.65352	4.28143	4.12448	4.26666
YDR178W	4.05695	4.224	3.92034	4.25501	3.9647	3.99527	3.97461	4.00988
YDR179C	3.66661	3.27847	3.44215	3.22536	3.42828	2.58807	2.37747	2.74035
YDR179W-A	2.52128	3.30218	3.37751	3.25895	3.22853	3.40768	3.38651	3.48364
YDR180W	2.71482	3.96184	3.92485	3.94919	3.68831	3.9489	3.93573	3.94208
YDR181C	4.28714	4.43663	4.49629	4.4617	4.16845	4.03342	4.14092	4.09433
YDR182W	4.66379	4.26158	4.32444	4.26624	4.23135	4.11978	4.07193	4.19079
YDR183W	3.56601	3.37695	3.46309	3.52008	3.22187	3.17555	3.00844	3.2014
YDR184C	4.18814	4.18691	4.48569	4.42901	4.13849	4.58101	4.55537	4.59084
YDR185C	1.6133	2.26625	2.63573	2.74577	1.5428	2.79372	2.54251	2.80842
YDR186C	5.42597	4.69402	4.79492	4.69339	4.44888	4.6257	4.6518	4.64039
YDR188W	5.01073	4.70523	4.63736	4.69006	4.70329	4.78818	4.70056	4.80094
YDR189W	4.68999	4.42672	4.40231	4.51373	4.45635	4.33997	4.40569	4.367
YDR190C	5.14537	4.99187	5.03498	5.0633	5.10472	4.97321	4.95519	5.00295
YDR191W	2.79703	2.97592	3.07611	3.15033	2.82555	2.99371	3.06771	3.00281
YDR192C	3.5994	3.33184	3.18377	3.20874	2.83206	2.84609	2.63507	2.84079
YDR194C	5.19998	5.67177	5.64097	5.72472	5.58531	5.575	5.62543	5.59353
YDR195W	3.17848	3.32651	3.33026	3.30939	2.86156	3.472	3.39649	3.46992
YDR196C	4.0854	3.73803	3.85761	3.89697	3.86109	3.17692	3.10933	3.2605
YDR197W	4.1206	3.9761	4.10765	4.10674	4.03363	4.06072	3.89896	4.11363
YDR198C	3.03416	3.70168	3.73832	3.53631	3.25704	3.67489	3.56098	3.66561
YDR200C	4.65058	4.32039	4.27017	4.24697	4.18565	3.78743	3.8064	3.83613
YDR201W	4.27794	3.85503	3.88371	3.82855	3.98431	3.20748	3.16655	3.15644
YDR202C	3.53184	3.71689	3.75931	3.83778	3.71451	3.3331	3.22807	3.34755
YDR204W	3.47012	2.92463	3.03812	3.042	3.33256	2.40522	2.43301	2.44883
YDR205W	3.47379	4.15639	4.15407	3.94715	3.80671	4.16115	4.17125	4.14527
YDR206W	3.78623	4.38095	4.27143	4.24	3.99441	4.40089	4.43069	4.42007
YDR207C	4.66541	3.61173	3.66361	3.78884	3.58731	3.39294	3.4338	3.40209
YDR208W	5.24279	4.85214	4.81824	4.85147	4.69744	4.92622	4.89752	4.9229
YDR210W	5.03774	4.3907	4.54696	4.5014	4.98424	4.47714	4.12278	4.55016
YDR211W	3.87216	4.91817	4.89752	4.89241	4.9014	5.01419	4.99463	5.04523
YDR212W	4.02934	5.0701	4.93518	5.11047	5.19052	5.23276	5.1829	5.26099
YDR213W	3.64588	3.44158	3.86184	3.35794	3.18873	3.50882	3.61331	3.51082
YDR214W	5.52625	5.18202	5.02882	5.4718	5.38672	4.95682	4.93602	4.95527
YDR216W	4.43725	4.20394	3.80795	4.19196	4.80618	4.04947	4.01676	4.04919
YDR217C	4.04558	4.28804	4.25716	4.08639	3.89846	3.82156	3.97641	3.85869
YDR218C	-1.88988	-0.543815	-1.52459	-1.74744	-1.79431	-1.0945	-0.978586	-0.896706
YDR219C	4.28435	4.63079	4.65171	4.59078	4.5356	4.28336	4.21103	4.28891
YDR221W	4.21127	4.17556	4.2511	4.22532	4.11809	4.09072	4.16535	4.07763
YDR222W	2.74262	2.11091	2.23035	3.70354	3.4494	3.9056	3.89073	3.95522
YDR223W	1.19006	0.65304	1.92997	1.05097	1.67592	1.09712	1.0435	1.26477
YDR224C	6.07967	6.61772	6.78282	6.83633	6.91705	6.43246	6.35895	6.41511
YDR225W	5.54707	6.66139	6.7561	6.56364	6.98508	6.41412	6.23562	6.34248
YDR226W	5.03722	4.66346	4.8934	4.91153	5.33176	5.01579	4.93676	5.04098
YDR227W	4.34673	4.69518	4.754	4.56268	4.47715	4.27824	4.40614	4.29865
YDR228C	4.03601	3.7622	4.00172	4.00437	3.55573	4.01172	4.07757	4.09339
YDR229W	5.02848	4.05866	4.2464	4.12881	3.96687	3.80109	3.74135	3.71534
YDR231C	4.24828	2.79608	3.14518	3.29536	3.2484	2.28709	2.04841	2.24246
YDR232W	4.48832	4.33777	4.41153	4.39374	4.30412	4.57266	4.62652	4.59888
YDR233C	5.1425	5.44684	5.3719	5.47465	5.32645	5.71507	5.66687	5.72045
YDR234W	3.58014	3.08859	2.94536	2.94001	2.73169	3.15991	3.12457	3.15452
YDR235W	3.33085	4.02292	4.03622	4.06987	4.12504	4.15311	4.09044	4.2038
YDR236C	3.39757	3.5277	3.55728	3.28991	3.36851	2.9414	2.51636	2.88798
YDR237W	4.00667	4.26159	4.10771	4.31341	4.07615	3.95449	3.63097	3.94731
YDR238C	4.57573	5.27209	5.18007	5.2364	5.22153	5.28092	5.28121	5.26501
YDR239C	3.66467	3.42366	3.43137	3.32159	2.94356	3.29006	3.30743	3.24229
YDR240C	3.51415	3.92743	3.99994	3.85345	3.69554	3.96693	3.9318	4.01314
YDR242W	2.99375	2.93888	2.91718	2.8126	2.63532	2.53493	2.40807	2.62629
YDR243C	3.05299	3.74062	3.87422	3.64329	3.67592	3.56413	3.63947	3.59342
YDR244W	4.45399	4.35836	4.41877	4.33469	4.22139	3.96729	4.00994	4.01156
YDR245W	4.53737	4.74176	4.89997	4.80731	4.97791	4.87304	4.68644	4.90064
YDR246W	5.269	3.92601	4.14781	4.16754	3.99778	3.22139	3.29056	3.18287
YDR246W-A	3.61586	1.39403	1.19825	1.27964	1.99762	1.4478	1.5638	1.27429
YDR247W	3.33491	3.76587	3.81456	3.9843	3.92954	4.02812	4.09928	3.95897
YDR248C	4.47784	3.80174	4.10406	4.00666	4.43435	2.84626	2.73229	2.89381
YDR249C	1.58954	3.1738	3.29363	3.11372	3.0112	3.55729	3.39136	3.60865
YDR251W	4.48194	4.85992	4.83415	5.08025	4.73574	4.83143	4.80051	4.81881
YDR252W	2.82098	3.6123	3.66522	3.76771	3.49325	3.1857	3.12327	2.95645
YDR253C	2.81103	2.27826	3.07477	4.5249	2.79195	3.52665	3.35142	3.73398
YDR254W	3.29299	3.68842	3.58004	3.90656	3.37261	3.71914	3.62801	3.76604
YDR255C	4.42353	4.13267	4.13966	4.31392	4.08047	3.82864	3.76882	3.76752
YDR256C	1.42637	1.02722	0.9714	0.937096	0.633661	1.47259	1.71607	1.69634
YDR257C	3.45424	4.68539	4.72539	4.70515	4.63192	4.6579	4.70372	4.72132
YDR258C	5.06984	6.14565	6.1335	6.4184	6.41488	5.36705	5.33143	5.31289
YDR259C	3.15723	1.71312	2.5142	2.85595	2.41921	2.15678	2.31306	2.08889
YDR260C	5.24505	3.04333	3.23307	3.26012	3.21504	3.03176	2.8215	3.0471
YDR261C	3.56581	3.3255	3.24589	3.42711	3.57016	3.44172	3.40507	3.425
YDR262W	4.74186	4.57278	4.70632	4.63155	4.65849	4.37106	4.19029	4.42774
YDR263C	1.69184	2.0502	2.57634	2.51568	2.1087	2.73031	2.52197	2.7945
YDR264C	4.40433	5.03676	5.24602	4.67122	5.26631	4.94283	4.89864	4.91838
YDR265W	3.99013	3.65101	3.76567	3.5911	3.73598	3.30427	3.27465	3.33113
YDR266C	4.75512	4.75	4.66039	4.74619	4.54592	4.77523	4.75514	4.77412
YDR267C	4.09099	4.17934	4.31631	4.15985	4.29111	4.09031	3.87476	4.14965
YDR268W	3.2643	3.60965	3.63225	3.61136	3.70296	3.08302	3.01031	3.03551
YDR270W	4.82659	5.00983	5.62658	4.40526	5.49044	4.6218	4.66572	4.63761
YDR272W	4.82662	4.08626	4.13352	4.36793	4.15782	3.74267	3.66562	3.75512
YDR273W	2.146	1.83501	2.09509	2.15136	1.42849	2.16403	2.14854	2.20575
YDR275W	4.36206	3.91462	4.18393	3.73511	4.15681	4.06187	4.04299	4.0905
YDR276C	6.9608	5.75065	5.82804	5.76198	6.36559	5.58108	5.26662	5.54201
YDR277C	4.13427	2.42281	1.75227	3.55225	2.20086	3.67834	3.54613	3.55219
YDR279W	4.05608	3.76576	4.0068	3.80607	3.69664	3.63878	3.52431	3.73939
YDR280W	5.7415	4.93137	5.07233	4.79132	4.92711	4.91102	4.87251	4.98551
YDR281C	4.2686	1.30569	0.561274	0.0402837	3.17732	3.06171	2.26533	3.02823
YDR282C	3.40489	3.01979	2.90573	3.23619	2.98557	2.68112	2.69843	2.6551
YDR283C	3.51042	4.29763	4.1927	4.26446	4.0908	4.2351	4.32609	4.2183
YDR284C	3.86255	3.71789	3.91666	3.72721	3.96486	3.75822	3.61211	3.65622
YDR285W	2.31686	2.65981	2.65869	2.8163	2.38116	2.10585	2.36806	2.13114
YDR286C	3.00102	3.11378	3.3114	3.46961	3.19188	2.36923	2.27363	2.34116
YDR287W	3.52096	3.13806	2.87287	3.07343	3.13006	2.6289	2.55614	2.69748
YDR288W	3.93555	4.10166	4.18935	4.24238	4.0879	3.94269	3.84358	3.96437
YDR289C	4.42927	4.24247	4.267	4.45286	4.31313	3.87384	3.85974	3.93574
YDR291W	3.46144	4.07368	3.84462	3.90716	3.73954	3.92515	3.93868	3.9321
YDR292C	5.13289	4.76483	4.61896	4.704	4.69353	4.62057	4.64011	4.63816
YDR293C	5.23149	5.07936	4.9642	5.09621	4.83534	4.77578	4.80654	4.73805
YDR294C	3.99908	4.16301	3.88206	3.97708	3.99938	3.88224	3.84305	3.85913
YDR295C	3.63862	3.78292	3.84703	3.82206	3.69685	3.76483	3.788	3.77434
YDR296W	5.06405	3.62023	3.72682	3.67545	3.8102	3.23213	3.37797	3.26309
YDR297W	4.29335	4.0016	4.30687	4.02009	4.55422	4.61053	4.50537	4.60509
YDR298C	3.6338	4.64029	4.4877	4.712	4.62653	4.79294	4.70644	4.69255
YDR299W	4.95647	4.93197	5.21013	4.97228	4.78975	5.11648	5.21085	5.18589
YDR300C	4.18495	4.75122	4.99369	4.88287	4.68773	4.73407	4.74898	4.77666
YDR301W	4.23789	4.57731	4.43009	4.38958	4.24085	4.28439	4.34474	4.22271
YDR302W	4.31342	3.96837	4.16569	4.21326	4.22723	3.86744	3.60381	3.76485
YDR303C	4.23205	4.97555	4.91161	4.78419	4.88532	4.8459	4.83777	4.84906
YDR304C	4.95921	3.97181	4.00336	4.27985	4.05074	3.81243	3.73514	3.88655
YDR305C	3.61105	3.14855	3.38811	3.45488	2.96686	2.93312	2.75169	2.97111
YDR306C	4.14526	4.35989	4.30432	4.2568	4.26438	4.03327	4.06302	4.03496
YDR307W	3.3508	3.77723	3.78708	3.87806	3.71078	3.74691	3.71069	3.72867
YDR308C	4.83785	4.84958	5.22837	5.16657	4.9641	4.32443	4.16174	4.32112
YDR309C	5.39704	4.82032	4.87083	5.1054	4.90274	4.96876	4.86449	4.95201
YDR310C	4.78697	4.33783	4.25698	4.43831	4.09974	4.30394	4.32456	4.27889
YDR311W	4.09423	4.27743	4.33365	4.34917	3.95637	4.17615	4.15712	4.17646
YDR312W	4.11335	4.31762	4.42956	4.11502	4.06935	3.97901	3.90701	4.01265
YDR313C	3.78497	4.55137	4.61823	4.60768	4.44248	4.11585	4.09811	4.10381
YDR314C	4.2031	4.11024	3.99427	4.04076	3.97413	3.87276	3.89328	3.90407
YDR315C	2.61011	3.29116	3.4768	3.48744	3.35619	2.60832	2.60823	2.47743
YDR316W	4.87163	4.37926	4.40112	4.34926	4.14301	3.94214	3.81486	3.94901
YDR317W	0.664019	1.52016	1.62727	1.5578	1.26199	1.59534	0.888864	1.68169
YDR318W	3.70125	3.72604	3.76326	3.64147	3.54467	3.40585	3.21072	3.51862
YDR319C	3.97185	3.75269	3.96028	3.67549	3.79274	3.53716	3.44445	3.58984
YDR320C	3.69441	3.80565	3.72038	3.64558	3.52733	3.51753	3.744	3.5205
YDR320C-A	5.63129	4.50826	4.94393	4.82255	5.01729	3.95707	3.72937	4.01213
YDR321W	3.34003	4.06033	4.0772	4.0701	4.13392	4.16193	4.02693	4.25142
YDR322C-A	5.0927	4.86721	4.98918	5.22833	4.94639	4.50834	4.30671	4.46277
YDR322W	3.77582	3.97545	3.85358	4.08207	3.9645	3.91274	3.87324	4.02263
YDR323C	2.96835	3.37032	3.47972	3.27824	3.19617	3.04671	2.9689	3.12466
YDR324C	4.32304	4.80886	4.7311	4.61262	4.59919	5.0776	5.13405	5.14079
YDR325W	3.79663	4.06882	4.0256	4.06781	3.9198	3.99821	4.09433	4.00027
YDR326C	4.17871	4.59407	4.50819	4.51189	4.2633	4.59125	4.67888	4.6083
YDR328C	5.33226	4.46606	4.73746	4.6998	4.74266	4.02817	3.87212	3.96368
YDR329C	4.22578	4.35444	4.41918	4.3444	4.29878	4.04666	3.96895	3.96789
YDR330W	4.71011	3.94466	3.97576	4.0276	3.88343	3.47528	3.41286	3.467
YDR331W	4.27279	4.57344	4.50956	4.46496	4.49577	4.3999	4.35257	4.40563
YDR332W	2.98203	3.49026	3.24042	3.35158	2.84238	3.29258	3.29141	3.327
YDR333C	3.9749	4.55641	4.58625	4.62206	4.32951	4.64408	4.6508	4.64135
YDR334W	4.8684	4.48648	4.46208	4.58955	4.31939	4.55016	4.6075	4.54533
YDR335W	4.38724	5.05963	4.92347	5.10014	4.9112	4.97945	4.96577	4.96413
YDR336W	2.79791	3.18546	3.12672	3.41335	2.85909	3.2319	3.03287	3.24191
YDR337W	4.6999	4.59832	4.50881	4.59948	4.56647	4.17368	4.12201	4.21109
YDR338C	3.32388	3.78765	3.8189	3.62277	3.46777	3.6013	3.58893	3.62066
YDR339C	4.9443	4.70209	4.92501	4.923	4.88979	4.54914	4.46371	4.5667
YDR341C	4.69538	5.09096	5.15379	5.08097	5.27438	5.3747	5.36865	5.40309
YDR342C	2.01263	0.506278	-0.569783	2.14164	0.387098	2.65629	2.76252	2.40225
YDR343C	-0.10975	0.196004	0.329125	-0.227768	0.379524	0.270488	0.516509	0.386755
YDR345C	5.75258	5.04706	5.27809	5.33594	6.02547	6.27845	6.21623	6.27231
YDR346C	4.48358	5.00892	5.12953	5.02729	5.09154	5.17503	5.19924	5.1786
YDR347W	4.33175	3.89511	3.79182	3.85959	3.99933	3.47732	3.52683	3.51463
YDR348C	4.88263	4.31531	4.33816	4.2916	4.12287	4.1829	4.21227	4.14902
YDR349C	3.89566	4.01361	3.99399	3.85503	3.88336	3.95438	3.97974	3.94236
YDR350C	3.51177	4.26538	4.25863	4.11651	3.94297	4.14148	4.1504	4.15525
YDR351W	4.43719	4.68311	4.83849	4.65017	4.36238	4.65142	4.67592	4.66211
YDR352W	3.8603	4.13584	4.32045	4.23811	4.20546	4.30327	4.24199	4.21309
YDR353W	7.22491	6.76622	7.22595	6.97327	7.39147	6.94906	7.04319	6.93079
YDR354W	4.2527	4.76791	4.94324	4.71403	4.90037	4.56909	4.55456	4.56989
YDR356W	4.61324	4.74869	4.8059	4.86628	4.74753	4.25478	4.38153	4.32519
YDR357C	4.08243	3.75012	4.02733	4.20013	3.8531	3.13564	2.92384	3.05071
YDR358W	4.27473	4.36379	4.39705	4.52534	4.37854	3.69299	3.61273	3.57846
YDR359C	4.58491	3.61564	3.68226	3.89354	3.24723	3.73182	3.73513	3.72017
YDR361C	3.9122	4.55613	4.88027	4.84269	4.86058	4.90579	4.70299	4.96711
YDR362C	3.30864	3.49925	3.39455	3.40573	3.28172	3.34437	3.37735	3.32529
YDR363W	4.21998	4.3771	4.32533	4.31522	4.26272	4.10674	4.25548	4.09386
YDR363W-A	7.33191	5.55934	6.04325	6.1535	6.13055	4.99028	4.73362	5.00159
YDR364C	3.85213	4.17749	4.16446	3.98702	3.85099	4.01812	4.05915	4.01516
YDR365C	5.39018	4.99362	5.07011	5.06171	5.0387	5.20295	5.37369	5.25392
YDR367W	2.83591	3.23602	3.10697	3.09891	3.33625	2.97713	2.84861	2.89765
YDR368W	5.28021	5.13476	5.29763	5.26394	5.49689	4.85839	4.83114	4.84777
YDR369C	2.96362	3.57734	3.49144	3.49668	3.26723	3.17756	3.1983	3.19837
YDR370C	3.59803	3.75761	3.83643	3.93606	3.56595	3.73522	3.74329	3.79731
YDR371W	3.13232	3.53906	3.56949	3.71524	3.18884	3.49113	3.30704	3.47236
YDR372C	5.04375	4.87392	4.91166	4.93306	4.94553	4.79854	4.68934	4.84698
YDR373W	3.83842	4.46764	4.48733	4.43225	4.71501	4.13213	4.03001	4.1241
YDR374W-A	3.38972	3.23558	4.00372	3.75333	3.84043	2.58253	1.77895	2.70031
YDR375C	3.80299	3.48596	3.43712	3.39838	3.34573	3.03222	3.05834	2.96073
YDR376W	3.54415	3.57064	3.55089	3.43945	3.57125	3.34742	3.36545	3.2341
YDR377W	4.65302	5.067	4.93919	5.19158	5.25804	5.04108	4.72634	4.94298
YDR378C	5.35192	4.51258	4.72034	4.60365	4.88167	3.85975	3.6537	3.75883
YDR379C-A	3.75777	2.65072	3.28055	3.48336	3.27197	2.23899	2.15973	2.05137
YDR379W	4.39854	4.22376	4.20686	4.19091	3.88817	3.94214	4.03999	4.02665
YDR380W	4.19441	2.15383	4.78275	2.74369	4.10597	3.07537	3.08755	2.76462
YDR381C-A	4.0014	2.95183	3.54936	3.44008	3.43553	2.70656	2.49621	2.77561
YDR381W	4.83052	5.18332	5.23026	5.1615	4.98281	5.07796	5.00984	5.10221
YDR382W	6.32775	6.41508	6.47506	6.51478	6.55752	6.49906	6.50198	6.47689
YDR383C	4.92596	3.84896	4.0766	3.86116	3.91092	3.33078	3.10287	3.34251
YDR384C	4.04268	3.53703	3.524	3.27677	3.99064	3.77712	3.73789	3.88916
YDR385W	3.47345	4.45725	4.49786	4.61527	4.50568	5.00831	5.05825	5.03135
YDR386W	3.30837	3.47574	3.41887	3.31616	3.14594	3.02568	3.11359	3.08378
YDR387C	2.61289	3.18622	3.26075	3.01749	3.02972	3.2044	3.23223	3.16048
YDR388W	5.43537	4.3876	4.56005	4.64549	4.69955	4.28255	4.21355	4.25555
YDR389W	4.77479	4.58071	4.54782	4.48078	4.27828	4.52466	4.49516	4.49098
YDR390C	4.40337	4.59223	4.51486	4.47774	4.42145	4.45519	4.4028	4.46756
YDR391C	3.25422	3.21988	3.32611	3.56756	3.51303	3.07972	2.95403	2.93924
YDR392W	4.20431	3.76445	3.76451	3.83106	3.67935	3.56474	3.47336	3.59518
YDR393W	4.72699	4.31277	4.5628	4.46693	4.1303	3.9277	3.97334	3.91907
YDR394W	5.87314	5.09303	5.25704	5.3651	5.24976	4.97509	4.84724	4.93041
YDR395W	4.06214	4.95521	4.93254	4.90479	4.96434	5.22841	5.26233	5.22715
YDR397C	4.82529	3.05442	3.56282	3.3149	4.27459	3.76272	3.51297	3.78759
YDR398W	4.36719	4.25503	4.43232	4.15714	4.16327	4.69274	4.7241	4.74381
YDR399W	4.29515	3.76819	4.13776	4.24698	4.25339	4.57744	4.40839	4.52535
YDR400W	3.0516	2.94876	3.00529	2.99006	2.93569	2.93655	2.92873	2.87262
YDR402C	-1.01507	-0.350914	-0.704079	-1.07199	-0.848004	-0.546221	-1.12336	-0.71973
YDR403W	1.0768	1.09035	0.172062	-0.151075	-1.34891	-0.136463	-0.114971	-0.0697974
YDR404C	4.28726	4.84153	4.85706	4.94428	4.91528	4.88656	4.78263	4.87489
YDR405W	5.50626	4.12347	4.20167	4.21886	4.00972	3.48431	3.38203	3.48329
YDR406W	3.52071	2.78834	2.87874	2.93654	3.31098	3.36197	3.35903	3.35375
YDR407C	3.99825	4.67737	4.57565	4.66765	4.22783	4.52516	4.54673	4.53389
YDR408C	4.65184	3.25937	3.53087	3.4397	3.50819	2.77937	2.86651	2.84705
YDR409W	3.9654	3.39611	3.52925	3.46808	3.21429	3.29259	3.3676	3.23103
YDR410C	3.72486	3.95794	3.82571	3.82913	3.97635	3.67403	3.42059	3.69884
YDR411C	3.90262	3.30311	3.28547	3.24632	3.22509	2.98632	2.84845	2.95768
YDR412W	5.51337	4.70657	4.98091	4.84438	4.86675	4.57924	4.59682	4.68879
YDR414C	2.75747	3.61502	3.44035	3.60131	3.24113	3.64676	3.68133	3.66203
YDR415C	4.17476	3.80507	3.69002	3.63505	3.50524	3.29681	3.15852	3.27335
YDR416W	3.81199	4.10556	4.04304	3.86704	3.84249	4.0903	4.16758	4.08877
YDR418W	5.58586	5.98636	5.99152	6.01318	6.10141	6.17618	5.99641	6.1827
YDR419W	3.25537	3.31064	3.20074	3.17355	2.94246	3.17923	3.28783	3.2561
YDR420W	4.47943	3.99255	4.01386	4.0384	3.68296	4.21293	4.23228	4.23554
YDR421W	3.36149	3.68613	3.72799	3.63803	3.37469	3.47865	3.49561	3.42998
YDR422C	4.17993	4.47243	4.36146	4.31527	4.01512	4.32853	4.38343	4.34047
YDR423C	4.87955	4.4167	4.93654	4.54518	4.46918	4.05634	3.89484	4.02822
YDR424C	3.33577	3.10612	3.58601	3.50843	3.17639	2.76624	2.44851	2.83838
YDR425W	4.1817	4.14568	4.24369	4.15467	3.70714	3.64553	3.73248	3.71545
YDR427W	5.36413	5.45135	5.46934	5.61741	5.66917	5.51716	5.42676	5.51039
YDR428C	1.89066	3.33862	3.18968	3.40734	3.12848	3.33806	3.12378	3.38472
YDR429C	5.22273	5.23431	5.28326	5.31429	5.31551	5.0757	5.01593	5.09299
YDR430C	3.90157	4.03775	3.99167	4.07952	3.86231	4.10168	4.12539	4.0898
YDR432W	6.81814	4.77099	4.81849	4.82553	4.93689	4.81312	4.74432	4.79492
YDR434W	3.80552	4.34527	4.15418	4.11786	4.18812	4.11017	4.09097	4.10232
YDR435C	2.61368	3.24487	3.23339	3.48722	3.33734	3.17288	3.14723	3.28484
YDR436W	3.7205	3.1629	2.84942	2.88461	2.5531	2.82585	2.88729	2.81106
YDR437W	4.00588	3.32826	3.25804	3.03793	2.72981	3.11957	3.24552	3.23708
YDR438W	2.93267	3.29678	3.05465	3.00454	2.73612	3.28141	3.23369	3.30793
YDR439W	3.29716	3.92264	3.80824	3.95259	3.68926	3.56436	3.36298	3.56358
YDR440W	4.02201	3.8442	3.78117	3.78689	3.53018	3.80112	3.79947	3.72888
YDR441C	3.6615	3.95186	4.1113	3.93963	3.95614	4.22594	3.86956	4.22365
YDR443C	3.85065	3.9252	3.77649	3.83752	3.51793	3.59061	3.64028	3.53725
YDR444W	4.24594	3.88716	3.75433	3.65179	3.54805	3.72754	3.7884	3.74549
YDR447C	4.34141	5.09506	5.2906	5.20945	5.33868	5.42617	5.36715	5.40469
YDR448W	4.35575	4.16325	4.25264	4.17016	3.81699	3.92637	3.96862	3.9562
YDR449C	4.13457	4.71563	4.66861	4.58637	4.43255	4.8569	4.77071	4.90666
YDR450W	4.36025	4.97477	5.03554	5.06241	4.99412	5.31377	5.12103	5.26666
YDR451C	4.07626	3.50065	3.57005	3.75639	3.56856	3.59687	3.47969	3.60629
YDR452W	5.30601	4.76117	4.73942	4.76005	4.72069	4.37197	4.36915	4.32155
YDR453C	3.41134	2.76791	3.32769	2.36448	3.25243	1.80062	1.87062	1.84086
YDR454C	3.92703	4.40475	4.38295	4.34032	4.50317	4.3644	4.30994	4.37821
YDR456W	3.24227	3.97195	4.02702	3.88985	3.82265	4.01596	3.90291	4.00652
YDR457W	4.35385	5.00455	4.79121	4.90262	4.69488	4.79207	4.85253	4.78466
YDR458C	4.06163	4.50774	4.36275	4.50189	4.44722	4.25671	4.31629	4.23229
YDR459C	2.80098	3.4449	3.54087	3.30841	3.25217	3.21819	3.0833	3.15722
YDR460W	4.86536	4.06778	4.08338	4.18674	4.04472	3.77414	3.62406	3.73577
YDR461C-A	4.11376	1.89702	2.00902	2.15356	2.25399	-0.354178	0.273136	0.338969
YDR461W	1.87951	0.664602	1.25964	1.29977	0.630007	1.13516	1.06374	1.17898
YDR462W	5.07065	3.96943	4.14434	4.04967	4.33069	3.23735	3.25423	3.14946
YDR463W	4.97456	4.6363	4.79288	4.705	4.508	4.42958	4.43145	4.46444
YDR464W	4.8123	4.51533	4.50664	4.4094	4.2529	4.07918	4.18752	4.09799
YDR465C	4.47471	3.99049	4.07403	3.69695	3.80418	4.2964	4.32641	4.40264
YDR466W	4.69313	4.33724	4.38529	4.32971	3.9972	4.11898	4.12734	4.07428
YDR468C	5.73154	4.59651	4.67422	4.65734	4.65168	4.16733	4.10681	4.15886
YDR469W	4.73103	4.01387	4.38702	4.38827	4.41107	3.81093	3.36814	3.83
YDR470C	3.69851	3.82577	3.70569	3.59114	3.66106	3.53309	3.48932	3.54768
YDR471W	5.16875	4.99265	5.21758	5.19997	5.20534	5.377	5.12506	5.39444
YDR472W	4.85238	4.46276	4.58498	4.49172	4.69528	4.7499	4.6563	4.84996
YDR473C	4.65758	4.00642	4.02172	4.06021	3.73256	3.5332	3.41891	3.61627
YDR475C	4.62808	3.58391	3.49971	3.66257	3.62065	3.42052	3.34724	3.33506
YDR476C	4.27374	2.93745	3.28037	2.32693	3.22301	2.10911	1.8166	2.27281
YDR477W	4.95489	4.54609	4.49527	4.62629	4.42272	4.45037	4.42496	4.42411
YDR478W	4.20741	3.65805	3.86347	3.83701	3.84196	3.53282	3.51736	3.69732
YDR479C	3.58118	3.62196	3.65829	3.6051	3.53335	3.46016	3.38155	3.44345
YDR480W	4.90817	3.74869	4.13899	3.87288	4.02686	3.3928	3.32269	3.41546
YDR481C	4.81722	3.96629	3.90419	3.87217	4.53654	3.95455	3.90907	4.00719
YDR482C	4.67427	2.69485	3.05603	2.77396	2.6637	2.05901	2.00772	2.08421
YDR483W	4.88949	4.6868	4.81399	4.82461	5.06403	4.9805	4.93502	4.94309
YDR484W	3.07646	4.11623	3.98746	4.11999	3.65562	3.89039	3.91868	3.87372
YDR485C	4.88225	4.49739	4.54493	4.43325	4.19374	4.08151	4.13817	4.09923
YDR486C	5.21454	3.96497	4.34234	4.37193	4.15391	3.69257	3.62992	3.60662
YDR487C	5.24967	5.00305	5.69846	5.19833	5.72509	5.10629	5.05038	5.08722
YDR488C	3.47491	2.50126	2.77828	2.61173	2.57923	2.31296	2.45555	2.32293
YDR489W	3.67399	3.7299	3.7051	3.6654	3.43855	3.75149	3.61462	3.72796
YDR490C	3.95361	3.23823	3.15196	3.27978	3.03012	2.89528	2.90295	2.89475
YDR492W	3.77496	3.96268	4.40255	3.50364	4.18603	4.43525	4.37376	4.48949
YDR493W	4.17437	3.59009	4.0574	3.89318	3.98866	3.37582	3.00498	3.42711
YDR494W	5.25997	4.47993	4.47742	4.56131	4.33146	4.09202	4.06579	4.19392
YDR495C	3.85196	4.29851	4.14242	4.11004	3.84166	3.91841	3.86558	3.96302
YDR496C	4.1431	5.06358	5.18413	5.18994	5.15707	5.53811	5.54021	5.60739
YDR497C	6.55348	6.01915	6.22656	4.38126	6.07613	4.55189	4.52706	4.53302
YDR498C	4.44046	4.29694	4.60515	4.46341	4.277	3.99255	3.96302	4.05442
YDR499W	4.11145	4.03072	4.0619	3.826	3.74891	3.67099	3.69078	3.62937
YDR500C	4.49561	4.59609	4.69796	4.68921	4.61652	4.471	4.42122	4.43213
YDR501W	2.67789	2.26569	2.45143	2.58382	2.86944	2.52571	2.58297	2.41846
YDR502C	4.97587	6.28587	6.52643	5.41674	6.36219	5.21601	5.19172	5.25214
YDR503C	2.59649	3.24945	2.82688	3.3553	2.9451	2.86487	2.43441	2.9262
YDR504C	2.63714	3.89754	3.94011	4.13881	4.72129	4.33605	4.17295	4.2808
YDR505C	4.58437	4.46811	4.43324	4.66829	4.55743	4.40183	4.40364	4.36898
YDR506C	3.31694	3.22451	3.1151	2.98514	3.00775	2.47325	2.32357	2.46698
YDR507C	4.50738	4.74146	4.69788	4.7597	4.48089	4.44521	4.45761	4.44352
YDR508C	5.33249	4.67213	4.9057	4.87181	5.23968	5.41529	5.38425	5.39508
YDR510W	7.04781	4.60249	4.84638	4.9923	5.24486	4.15268	3.8947	3.97554
YDR511W	4.41543	3.30435	3.35744	3.48915	3.66531	2.84936	2.66052	2.68551
YDR512C	5.63517	3.58517	4.00394	4.22025	4.12023	3.11591	2.6695	3.23481
YDR513W	5.61245	5.8917	6.14764	6.17559	6.35016	5.42455	5.2572	5.4726
YDR514C	4.69204	3.90847	4.22273	3.77277	3.89727	3.86912	3.87323	3.93598
YDR515W	4.65542	4.48749	4.76301	4.75485	4.48355	4.02715	4.06888	4.08572
YDR516C	4.14177	3.19108	3.57926	3.96706	4.07247	3.51458	3.1088	3.34179
YDR517W	5.09229	3.50493	3.50611	3.45928	3.62186	3.27036	3.10169	3.04658
YDR518W	3.48239	3.35924	3.70462	3.47147	3.56653	3.3092	3.19553	3.25018
YDR519W	4.02289	4.68772	4.82565	4.70371	4.99695	4.08531	3.93718	3.9779
YDR520C	3.50394	4.20935	4.07412	3.93043	3.73306	3.98224	4.05001	3.98209
YDR523C	-0.565127	-0.148387	-0.121004	0.140275	-1.94113	1.42278	1.2427	1.50801
YDR524C	3.93867	4.26063	4.24073	4.40449	4.01482	4.48984	4.45492	4.48485
YDR524C-B	8.39458	7.59017	7.32024	7.28652	7.59622	7.58271	7.50877	7.53265
YDR525W-A	3.88057	4.74801	4.75468	4.97451	4.80035	4.50343	4.49271	4.54186
YDR527W	5.05539	4.45479	4.58777	4.64229	4.46158	4.4318	4.51308	4.43802
YDR528W	4.498	4.40363	4.40898	4.15865	4.02007	4.16739	4.16004	4.17537
YDR529C	6.00029	4.80423	4.83873	5.22871	5.1688	4.7202	4.51263	4.74091
YDR530C	4.0326	3.31955	3.53656	3.54066	3.42615	3.321	3.26206	3.30081
YDR531W	3.32536	4.25864	4.37016	4.45224	4.42057	4.07733	3.98151	4.11461
YDR532C	4.43193	4.1035	4.21925	4.11255	4.20378	3.63997	3.63438	3.65393
YDR533C	5.42549	5.92217	6.02437	5.81905	6.35963	4.94516	4.93034	4.79311
YDR534C	3.11211	2.34192	5.35318	1.00083	4.3038	1.04721	1.31366	1.37255
YDR538W	3.08658	3.56844	3.67957	3.74936	3.38868	3.56919	3.56214	3.52513
YDR539W	3.06354	3.19943	3.27645	3.48509	2.94214	3.24839	3.15321	3.14054
YDR540C	3.25658	2.56551	2.76467	2.56323	2.60659	2.15084	2.07712	2.19949
YDR541C	2.78477	3.56496	3.71625	3.54281	3.3419	3.15629	2.9257	3.19428
YEL001C	5.00873	4.50252	4.53687	4.63628	4.80177	4.25823	3.98253	4.17932
YEL002C	4.00981	4.73563	4.79901	4.8018	4.87947	4.7569	4.65234	4.76084
YEL003W	4.60901	4.3891	4.86684	4.93997	4.74012	4.15527	4.00004	4.22747
YEL004W	2.38456	3.40558	3.16456	3.21137	3.21829	3.22504	2.995	3.20932
YEL005C	3.32905	3.44719	3.3688	3.54897	3.27029	3.01414	2.79462	2.97366
YEL006W	4.00493	4.30969	4.34469	4.29156	4.3761	4.11941	4.02593	4.10379
YEL007W	5.08643	4.53889	4.52254	4.73607	4.2618	4.66313	4.65285	4.69008
YEL009C	5.85618	6.47451	6.36209	6.56035	6.45245	6.86432	6.80158	6.88338
YEL011W	3.10252	3.24341	3.22838	3.90644	3.64924	3.20955	3.14242	3.13269
YEL012W	4.31797	3.68738	4.10474	3.98024	3.81456	2.93171	2.61837	2.85094
YEL013W	4.22961	5.01008	4.92213	5.06028	4.95649	5.00695	5.00684	4.94606
YEL015W	5.44734	4.91441	4.83368	4.88133	4.71668	4.55076	4.53498	4.57465
YEL016C	4.15269	3.59822	3.63917	3.68784	3.59032	3.69177	3.62027	3.7207
YEL017C-A	6.68174	6.6705	6.82628	6.89828	7.26055	7.24026	7.15964	7.24977
YEL017W	4.48036	4.01884	3.94768	4.06439	4.03667	3.62578	3.59341	3.64527
YEL018W	5.05954	3.99646	4.41185	4.36454	4.03747	3.71942	3.70041	3.73547
YEL019C	3.57115	3.29879	3.43712	3.23295	3.16206	3.1076	3.17011	3.13147
YEL020C	3.02732	2.75836	2.94782	2.88309	2.33427	2.70531	2.73742	2.65315
YEL020W-A	4.43287	3.89443	4.22172	4.36538	4.46923	3.83108	3.41052	3.84936
YEL022W	4.28359	4.87544	4.81864	4.72528	4.72472	4.64597	4.71363	4.62063
YEL023C	2.63366	3.09535	3.08005	2.93863	2.62132	3.05497	3.08149	3.08493
YEL024W	3.73404	4.02338	3.71692	4.43898	3.71637	4.25808	4.1364	4.20056
YEL025C	3.40552	4.10117	3.98188	4.02819	3.98918	4.07386	4.12031	4.09017
YEL026W	5.73757	5.47112	5.43075	5.46992	5.68152	5.65746	5.48699	5.67135
YEL027W	5.39467	5.77886	5.79626	5.85252	6.15683	5.95417	5.83781	5.92477
YEL029C	4.45586	3.46815	3.43576	3.11979	3.4105	3.22607	3.14692	3.2974
YEL030W	2.21895	2.51365	2.05916	2.34334	1.74424	2.17757	2.23129	2.15027
YEL031W	3.6796	5.0336	4.81483	4.85917	4.90477	5.11083	5.10539	5.07889
YEL032W	4.56673	4.09549	4.11245	4.18873	3.94024	4.20168	4.24506	4.24712
YEL033W	3.49717	4.89359	4.9365	4.96331	5.51254	4.65088	4.3166	4.63128
YEL034W	6.14187	6.33382	6.24038	6.55346	6.58342	6.87979	6.73423	6.82746
YEL036C	5.58407	4.29842	4.36137	4.44746	4.36322	4.29144	4.31793	4.2825
YEL037C	5.70847	4.58379	4.38805	4.51894	4.54843	4.41917	4.31779	4.4065
YEL038W	2.9477	3.31757	3.19995	3.36149	3.45116	3.00162	2.515	3.01234
YEL039C	4.50304	2.44629	2.32633	3.32962	2.07937	1.4277	0.849921	1.25632
YEL040W	6.15101	5.79335	5.61868	5.14407	5.49711	5.65525	5.51937	5.60985
YEL041W	2.21056	1.60706	2.25573	2.39259	2.16492	1.80173	1.79191	1.6451
YEL042W	4.36393	4.28322	4.21194	4.11601	4.13219	4.15627	4.23451	4.17246
YEL043W	4.64989	4.49949	4.51082	4.6489	4.28004	4.48101	4.48271	4.47748
YEL044W	4.98818	3.56488	3.65806	3.65	3.40336	2.47129	2.76866	2.39248
YEL046C	6.11764	6.62561	6.47212	6.2911	6.19226	6.74044	6.83479	6.69936
YEL047C	3.82601	3.91293	3.86864	3.59601	3.88778	3.66499	3.49858	3.66821
YEL048C	2.31453	3.76794	3.89645	3.48337	3.68215	3.93031	3.84902	4.02338
YEL050C	4.80455	3.91172	4.09724	4.05615	4.04849	3.82358	3.7432	3.75172
YEL051W	4.53422	4.8422	5.11319	5.17135	5.12229	4.66438	4.63741	4.64087
YEL052W	4.2564	4.02744	4.16712	4.03571	4.77254	4.48015	4.54652	4.53174
YEL053C	4.38074	4.24302	4.273	4.08011	4.50896	4.38987	4.46335	4.45141
YEL054C	5.73106	5.90398	6.0545	6.1329	6.09408	6.37027	6.29344	6.34964
YEL055C	3.85429	4.73128	4.58634	4.51279	4.5479	4.85585	4.9282	4.87375
YEL056W	4.68353	4.4654	4.56089	4.52964	4.31836	4.14203	4.16322	4.11503
YEL057C	0.379668	0.502252	1.4371	0.511345	-1.22202	0.0670995	-0.786137	-0.301654
YEL058W	3.60842	3.87604	3.94865	3.90438	3.94548	3.78229	3.73333	3.74837
YEL059C-A	3.96919	1.13361	1.409	1.06313	1.72583	0.951274	0.352579	1.0826
YEL060C	5.10081	3.89141	4.24017	4.1473	4.50659	3.97371	3.95625	3.88725
YEL061C	4.7472	4.58169	4.58944	4.51781	4.47054	4.31345	4.353	4.33961
YEL062W	3.28497	3.63653	3.60439	3.62509	3.21862	3.5847	3.4952	3.54834
YEL063C	4.58777	4.55665	4.64916	4.75978	4.62076	4.92826	4.91339	4.90311
YEL064C	2.42656	3.29308	3.24046	3.16446	2.95233	2.95711	2.99018	2.80936
YEL065W	4.68497	4.98701	5.86537	3.70913	5.61526	4.8077	4.63407	4.66719
YEL066W	3.52321	1.35153	2.00991	2.09369	2.26973	2.3757	2.14932	2.23916
YEL067C	2.86899	2.06587	2.96188	1.74968	2.3346	1.25654	1.18168	1.37586
YEL068C	3.30637	3.3951	3.7089	3.48231	3.46885	3.05358	2.95493	2.98638
YEL071W	6.25088	6.46981	6.64087	6.26452	6.84639	5.85399	5.69545	5.83086
YEL072W	2.99157	3.16833	3.32862	3.91008	3.63412	3.54997	3.58356	3.66596
YEL073C	4.29246	4.7083	5.15538	1.57829	4.66312	1.46985	-0.0134276	1.42323
YEL075C	-0.69115	-0.170754	-1.49978	0.119939	-0.577596	-0.41135	0.548214	-0.827679
YEL077C	1.98809	1.0502	1.13657	0.91224	0.312589	1.00996	0.930795	0.916238
YER001W	3.79515	2.90478	2.94017	3.38123	3.68002	4.40448	4.35599	4.33481
YER002W	6.1442	5.10423	5.31934	5.24413	5.16849	4.60941	4.45643	4.70264
YER003C	4.29445	3.65547	3.49851	3.81535	3.94006	3.97434	3.83418	3.99834
YER004W	4.64017	4.25645	4.1288	4.2072	4.42474	4.03106	3.77444	4.02061
YER005W	3.45122	3.76687	3.65948	3.69862	3.56795	3.99101	3.96026	4.00883
YER006W	4.11501	4.76796	4.8616	4.69526	4.84793	5.12849	5.13772	5.16695
YER007C-A	4.16376	4.3526	4.67418	4.54299	4.71596	4.25004	3.9346	4.33365
YER007W	2.67075	2.93564	2.83207	2.73667	2.57772	2.96625	2.796	3.08682
YER008C	4.74384	4.72082	4.65078	4.64465	4.47784	4.4328	4.4793	4.42822
YER009W	3.92986	5.0853	5.24726	5.25257	5.47117	5.16963	4.98793	5.20282
YER010C	4.03979	2.92292	2.95893	3.06283	3.06151	2.57425	2.20286	2.56697
YER011W	1.93882	0.726132	2.10034	1.15717	1.26744	3.32486	3.98893	3.18798
YER012W	5.87195	5.11099	5.19179	5.29357	5.28453	4.89236	4.65197	4.87593
YER013W	4.08719	4.20193	4.09557	4.02412	3.85514	3.91603	3.90777	3.91198
YER014W	3.55978	2.83741	3.01507	2.69237	2.8662	2.40654	2.4354	2.33016
YER015W	2.18491	2.35678	2.26892	2.37121	2.23828	2.26236	2.38341	2.16584
YER016W	5.35629	4.01269	3.86411	4.12263	4.06752	3.74034	3.79989	3.76433
YER017C	4.12003	4.09758	4.00533	3.9669	3.8452	3.901	3.85038	3.88247
YER018C	3.86429	2.7839	2.41664	2.58869	2.885	2.24929	2.12768	2.26136
YER019C-A	5.3125	4.67167	4.69021	4.6931	5.01089	4.28974	4.16963	4.24784
YER019W	4.05495	2.92109	2.99485	2.72674	3.01735	2.63734	2.42933	2.62265
YER020W	5.31323	4.16099	4.30676	4.24447	4.30573	3.71622	3.80456	3.67269
YER021W	5.07899	5.59004	5.57676	5.70684	5.76053	5.61636	5.5462	5.60933
YER022W	4.01339	4.65713	4.68496	4.73926	4.47117	4.45876	4.47861	4.48746
YER023W	4.11355	4.24151	4.11585	3.89959	4.36297	3.82948	3.83168	3.76663
YER024W	3.48979	2.85579	3.01416	3.05685	3.37345	2.70205	2.63741	2.7238
YER025W	6.43533	5.58451	5.53503	5.53375	5.47035	5.57733	5.55895	5.61576
YER026C	5.10385	5.63799	5.83601	4.25144	5.82743	4.14037	3.82578	4.12234
YER027C	4.62635	4.01189	4.04898	4.08103	4.00787	3.7303	3.51406	3.62985
YER028C	3.17844	2.6978	2.70092	2.14051	2.52876	1.80853	1.7793	1.93371
YER029C	5.27648	4.39392	4.49075	4.4254	4.56895	3.63955	3.6677	3.71563
YER030W	6.32647	4.92392	5.24404	5.23627	5.1611	4.109	4.18981	4.1623
YER031C	5.20761	4.224	4.19254	4.21242	4.34361	3.85434	3.59926	3.87076
YER032W	4.59174	4.1768	4.02635	3.99037	3.77477	3.90017	3.95598	3.89599
YER033C	3.95943	3.22545	3.1983	3.55272	2.86046	3.04641	3.06665	2.97883
YER034W	4.82395	3.45594	3.8357	3.39977	3.75357	2.69709	2.64011	2.81664
YER035W	6.53163	3.9727	4.61261	4.51029	4.80709	3.96608	3.51326	4.00171
YER036C	5.16559	5.43382	5.52231	5.61098	5.66633	5.90858	5.88987	5.92978
YER037W	3.87935	1.08883	1.81007	2.24933	4.04791	2.62881	2.81435	2.6003
YER038C	2.65712	3.58955	3.76506	3.48754	3.39061	3.66328	3.56763	3.68073
YER038W-A	3.01418	2.75657	2.68706	2.46204	1.96584	2.15701	2.17512	1.94714
YER039C	1.71351	2.59684	2.3568	1.91773	2.12742	1.71461	1.58849	1.69407
YER039C-A	2.53038	3.07871	3.24887	3.26585	3.32198	2.73113	2.86464	2.4758
YER040W	4.73439	4.27135	4.54253	4.35129	3.94574	4.1934	4.18901	4.19363
YER041W	2.99766	3.40641	3.46437	3.49793	3.09146	3.36879	3.40798	3.34263
YER042W	2.7526	4.45885	4.69818	5.45689	4.61193	4.76368	4.63445	4.8239
YER043C	5.30925	6.1454	6.16539	5.59507	6.26398	5.92463	5.80576	5.94398
YER044C	3.83995	3.17832	3.81294	3.34576	3.7314	3.37193	3.0646	3.40576
YER044C-A	1.34994	0.5334	1.51058	0.650124	1.10014	1.25125	0.934257	1.25563
YER045C	2.83876	2.36152	2.73847	2.4454	2.17416	2.3123	2.30072	2.33397
YER046W	3.14636	2.55669	2.92554	2.85766	3.03835	2.45662	2.26406	2.51772
YER047C	4.58096	4.16974	4.19019	4.14059	3.77249	3.92676	4.01017	3.93262
YER048C	5.23457	4.65343	4.67314	4.8626	4.83811	4.33476	4.42206	4.36625
YER048W-A	6.27899	5.57806	6.04387	5.71305	5.93509	4.99714	4.87332	5.0193
YER049W	4.40301	4.69044	4.90236	4.58328	5.03648	5.06282	4.9836	5.10445
YER050C	5.65585	4.88472	4.81728	4.96444	4.73655	4.01323	3.81964	4.05987
YER051W	3.58441	3.93225	3.97387	3.80423	3.699	3.56214	3.60457	3.49854
YER052C	4.70071	5.81361	5.81522	6.09451	5.78847	6.11201	6.099	6.07193
YER053C	3.10334	3.42935	3.34535	4.26109	3.4073	3.55048	3.45465	3.41007
YER053C-A	5.0494	3.17963	3.80702	5.58198	5.36313	5.1045	4.93996	5.04988
YER054C	2.2527	1.32364	1.69997	1.7707	0.824937	1.47792	1.42712	1.37732
YER055C	5.14351	5.1116	5.23498	5.32319	5.51754	5.18953	5.13337	5.16639
YER056C	4.5581	4.42043	4.69553	4.56148	4.84255	5.6357	5.61466	5.52255
YER056C-A	5.81522	4.46318	4.769	4.83553	4.68631	4.82768	4.68328	4.82729
YER057C	4.64274	3.96737	3.82421	3.8535	4.24659	3.75268	3.57343	3.71998
YER058W	4.64334	3.33065	3.74428	3.55854	3.70724	2.33015	2.06628	2.1297
YER059W	4.43033	4.36058	4.30361	4.37447	3.93062	4.02645	3.96143	4.05885
YER060W	2.33879	2.87486	2.66396	2.68821	2.75913	3.31886	3.09091	3.35991
YER060W-A	-0.0148371	-0.444802	-0.339103	-0.135419	-0.231494	0.849352	1.06526	0.698064
YER061C	3.26684	3.34092	3.38569	3.43069	3.19327	3.00984	3.02168	3.02638
YER062C	4.89958	2.80735	3.27726	3.88445	4.20202	3.89082	3.9423	3.74123
YER063W	5.03993	4.57456	4.72664	4.78109	4.76765	3.97686	3.91769	3.9006
YER064C	5.46557	5.34748	5.64837	5.35223	5.19335	5.61181	5.77475	5.56231
YER065C	2.74336	2.80431	2.82781	2.86805	2.65456	2.6932	2.779	2.69385
YER066W	2.40872	2.60575	2.39001	2.60759	2.2387	2.48453	2.30355	2.31971
YER067W	4.52838	3.67611	3.86985	4.77329	4.03654	3.88183	3.70811	3.8603
YER068W	5.44584	4.82912	4.89241	4.72963	4.62748	4.5783	4.51815	4.61553
YER069W	3.48918	3.96985	4.27269	3.64603	4.19156	4.08692	4.18199	4.05737
YER070W	4.95066	4.98373	5.1665	5.24215	5.28976	5.69768	5.7123	5.5804
YER071C	3.31233	3.43067	3.67848	3.77108	3.58935	3.05514	3.0819	3.01631
YER072W	6.08098	4.85377	4.89148	5.00601	5.79559	5.04095	4.93586	5.01049
YER073W	5.28101	4.72467	4.90115	4.90507	5.26634	5.55515	5.57735	5.50933
YER074W	4.57356	4.85007	5.09782	5.10826	5.09463	5.04635	4.9646	5.05487
YER074W-A	4.42208	3.95372	4.15913	4.09104	4.43245	3.27882	3.09204	3.39883
YER075C	3.64957	3.36802	4.02483	3.75875	3.51781	4.48142	4.51978	4.48642
YER076C	2.46866	2.55253	2.33884	2.32218	2.1161	2.30244	2.19187	2.4161
YER077C	4.01752	3.80666	3.81384	3.6996	3.50137	3.81486	3.79902	3.82537
YER078C	3.20532	3.45549	3.50341	3.31251	3.35734	3.39267	3.2482	3.42838
YER079W	4.82932	3.37618	3.79943	3.90578	3.94246	2.73347	2.69969	2.66511
YER080W	4.35863	4.446	4.56104	4.59225	4.50716	4.33048	4.34084	4.29223
YER081W	3.34568	4.23523	3.72202	4.06456	3.94721	3.74929	3.72343	3.80078
YER082C	4.54981	4.44539	4.53006	4.469	4.39617	4.37966	4.48809	4.39931
YER083C	5.0454	3.72569	3.81886	3.7253	3.9356	3.33252	3.34832	3.29398
YER085C	0.790355	-0.496942	-0.216728	-0.18848	-0.902499	-0.482427	-1.18253	-0.482199
YER086W	4.11549	4.74494	4.81497	4.86216	4.73987	4.85974	4.86476	4.8773
YER087C-B	5.13853	5.12797	5.12861	5.14371	5.53611	5.1565	4.96929	5.18321
YER087W	3.51929	3.32032	3.28977	3.46852	3.20351	2.98207	2.8783	2.9298
YER088C	5.90623	3.67375	3.77189	3.81604	4.09303	4.03025	4.04392	4.04004
YER089C	3.98497	4.20286	4.315	4.18004	4.17457	4.21389	4.18938	4.18622
YER090W	4.88434	5.11015	5.24594	5.07955	5.3797	5.12462	5.08186	5.17046
YER091C	5.36698	6.43028	6.3054	7.24784	6.72384	6.83975	6.83073	6.85847
YER092W	5.1779	4.36753	4.77075	4.92128	4.55573	3.90383	3.50825	3.9758
YER093C	4.0077	4.09527	3.97843	3.93389	3.76824	3.77229	3.79999	3.78548
YER093C-A	3.76295	2.99216	3.06138	3.23044	2.8638	2.4156	2.34677	2.42967
YER094C	5.65821	4.75501	4.82595	4.87127	4.92856	4.36069	4.11828	4.29136
YER095W	3.98024	3.92634	3.81546	4.151	4.3845	3.9145	3.77862	3.92388
YER096W	0.683783	0.851855	0.121317	0.689785	0.306281	-0.0735979	0.13093	0.0112277
YER098W	3.27617	3.0206	2.94343	3.04345	2.83359	2.61193	2.58263	2.55311
YER099C	4.01043	4.01271	3.70504	3.62827	3.7848	3.68548	3.5359	3.7178
YER100W	5.35415	4.46596	4.43668	4.46227	4.46801	4.24278	4.0359	4.33256
YER101C	2.59201	3.22305	2.8911	2.95686	2.82347	2.72509	2.68653	2.73885
YER102W	5.30452	5.233	5.58736	5.63697	5.45683	5.57774	5.46426	5.60794
YER103W	4.12718	5.03796	4.6148	6.03781	5.29754	4.74935	4.84516	4.60693
YER104W	3.11965	3.42401	3.42356	3.11303	3.07574	2.92743	2.83652	2.85264
YER105C	4.31951	4.9277	4.83443	4.73614	4.58936	4.70457	4.71733	4.72555
YER106W	0.366341	0.706725	0.250073	0.74033	0.604424	0.0781955	-0.354947	-0.316999
YER107C	4.2045	4.00911	4.03527	3.89696	4.02425	3.81567	3.69116	3.84101
YER110C	3.95932	4.86093	4.76309	4.55446	4.80196	5.12924	5.20365	5.12852
YER111C	4.60053	4.40636	4.4342	4.7688	4.09609	4.2277	4.26418	4.20932
YER112W	5.20948	4.98072	5.13883	5.18304	5.04226	4.34446	4.27885	4.4321
YER113C	3.34957	3.95815	3.75098	3.91008	3.82319	4.11406	4.00755	4.10707
YER114C	4.30201	4.30019	4.26365	4.13208	4.10116	4.16281	4.2452	4.17439
YER115C	3.49553	3.20285	3.32329	3.2429	3.27693	3.32755	3.07369	3.31469
YER116C	4.49467	4.02732	4.09981	4.00551	3.65089	3.61595	3.48705	3.59524
YER117W	5.13959	4.73871	4.75045	4.6895	4.8244	5.09144	4.85432	5.08325
YER118C	4.5158	4.18421	4.14912	4.25351	4.13251	4.1379	4.14319	4.22596
YER119C	3.81103	2.75395	2.49254	2.70896	2.77409	2.5526	2.5942	2.47877
YER120W	6.3274	4.71977	4.64864	4.75353	4.91567	4.44337	4.32814	4.47918
YER121W	3.03776	0.5561	0.526237	0.895177	0.898904	0.497001	0.331195	-0.0670907
YER122C	5.57991	5.21798	5.28727	5.42364	5.33737	5.19211	5.13208	5.202
YER123W	4.4289	4.95414	4.98824	5.12968	4.75083	5.08638	5.15398	5.10443
YER124C	4.87045	5.80245	6.09529	5.72485	5.8506	5.80909	5.96286	5.81186
YER125W	4.43677	4.86394	4.76175	4.93206	4.79788	5.06499	5.07612	5.04353
YER126C	5.42363	4.79437	5.14732	4.94552	4.95413	5.0443	5.04358	5.1515
YER127W	4.90848	4.35403	4.62857	4.39869	4.22783	4.47766	4.57122	4.48931
YER128W	3.23487	2.49101	2.99309	3.01045	2.48121	2.22448	1.70061	2.42676
YER129W	4.48746	4.58709	4.53525	4.57101	4.17196	4.6067	4.64788	4.64523
YER130C	4.18945	3.72185	4.15839	3.9542	3.96357	4.17203	4.15781	4.12097
YER131W	6.14915	6.00772	6.3181	6.34378	6.15074	6.26894	6.14801	6.28192
YER132C	4.00125	3.93671	3.9438	3.8953	3.46635	3.99802	4.05579	4.02782
YER133W	4.96966	5.14713	5.13443	5.33814	5.428	5.23895	5.17409	5.25954
YER134C	4.1573	4.03889	3.97665	4.14041	4.18952	3.76505	3.49645	3.67257
YER136W	5.09583	5.0394	5.11906	5.15977	5.14031	4.94775	4.90965	4.93779
YER137C	3.17744	2.68044	3.08336	2.31275	2.53619	2.4822	2.40454	2.74154
YER138W-A	4.19505	4.78295	5.10149	5.11698	4.88858	4.01235	4.29672	4.04406
YER139C	4.77735	4.04997	4.23574	4.09835	4.05113	3.72094	3.64882	3.7723
YER140W	3.16473	3.79912	4.04472	3.76287	3.55114	3.98675	3.85696	4.04134
YER141W	4.11181	4.9789	5.04846	4.91293	4.96454	4.69577	4.64762	4.69544
YER142C	3.67963	3.90339	3.9309	3.99767	3.96787	3.20858	2.63585	3.16804
YER143W	4.53381	3.87171	3.99899	4.08344	3.8792	3.60143	3.58863	3.49356
YER144C	3.99677	3.49428	3.4046	3.53027	2.93719	3.51125	3.64937	3.5216
YER145C	5.69163	5.84368	6.4647	4.92793	6.58378	5.45323	5.5279	5.45492
YER146W	5.0522	4.25998	4.69356	4.47599	4.74634	3.81943	3.68079	3.94458
YER147C	3.32645	3.43671	3.76298	3.23459	3.26907	3.38673	3.33152	3.39831
YER148W	5.52446	5.40284	5.6004	5.51054	5.7064	5.31439	5.26095	5.35487
YER149C	3.72142	3.79185	3.9093	3.86366	3.52288	3.63213	3.66382	3.70261
YER150W	3.72738	1.83664	2.02554	2.72804	2.95546	3.03175	3.26237	3.0542
YER151C	5.78776	4.67986	4.73993	4.83242	4.67721	4.5851	4.69362	4.60227
YER152C	4.68969	2.49306	2.57295	2.28825	2.4398	2.22243	2.11184	2.23803
YER153C	3.11767	2.56028	2.72975	2.2571	2.39565	2.38201	2.23951	2.52164
YER154W	4.57725	3.24547	3.36589	3.29147	3.31619	3.00941	2.88733	3.03885
YER155C	4.4225	4.88472	4.72515	5.0637	4.82794	5.10659	5.15374	5.10587
YER156C	4.4539	4.12486	3.87694	4.27533	4.07366	4.21311	4.00809	4.22598
YER157W	3.50631	4.33735	4.29269	4.24132	4.25579	4.34168	4.35221	4.31794
YER158C	3.0976	2.16945	2.27509	2.23896	1.95368	2.3371	2.29327	2.21048
YER159C	6.77891	3.8535	3.97281	4.0517	4.68446	3.7443	3.8408	3.73808
YER161C	5.1388	4.84466	5.00752	4.93783	4.7865	4.34552	4.40853	4.39253
YER162C	3.96508	3.55127	3.61009	3.67411	3.39195	3.22881	3.2678	3.25513
YER163C	3.79168	2.24305	2.19302	1.86349	2.19187	1.63152	1.00741	1.66792
YER164W	4.12605	4.62275	4.4403	4.64948	4.38046	4.3938	4.4403	4.39417
YER165W	4.72297	5.61646	5.64717	5.75655	5.7558	5.92628	5.9691	5.92914
YER166W	3.96203	4.61424	4.47364	4.52779	4.49844	4.42894	4.52614	4.42794
YER167W	4.42319	4.31141	4.28127	4.19953	3.86816	4.09936	4.14708	4.13226
YER168C	3.76255	4.16446	4.16388	4.14046	4.17898	4.16033	4.05874	4.14938
YER169W	3.95133	3.38586	3.74042	3.63475	3.36191	3.77312	3.85455	3.76744
YER170W	3.74448	3.16568	3.13771	3.30428	3.24324	2.58699	2.38242	2.49049
YER171W	3.50833	3.94318	3.85155	3.92048	3.54408	4.058	4.03745	4.09234
YER172C	3.93359	4.48307	4.29139	4.32334	4.19018	4.42299	4.40503	4.42171
YER173W	2.76743	3.54381	3.63952	3.47012	3.10296	3.50341	3.51628	3.50024
YER174C	3.00044	3.23981	3.0501	3.44805	3.04441	3.49916	3.30076	3.39319
YER175C	3.77094	3.82712	5.03893	4.23635	4.68266	3.91982	3.79184	3.84104
YER175W-A	3.74369	3.23281	4.19433	3.72005	4.06922	3.38321	2.74461	3.29705
YER176W	4.63654	4.56616	4.61569	4.58776	4.2499	4.27041	4.35052	4.30165
YER177W	7.64573	5.94853	5.97806	6.22155	6.56796	5.8363	5.62424	5.8135
YER178W	3.94682	4.40263	4.34872	4.55609	4.53885	4.32054	4.25359	4.25317
YER179W	0.567642	0.113286	-0.309662	-0.551983	0.283532	-0.497184	-1.2352	-0.265862
YER180C	3.88311	3.88505	4.02108	3.88117	3.75821	3.95368	3.80312	4.01594
YER180C-A	3.9223	4.78976	4.91243	4.78652	4.69019	4.50659	4.57161	4.55178
YER182W	4.18223	3.16696	3.29712	3.44624	3.11273	2.65961	2.67793	2.6306
YER183C	3.57591	3.49998	3.39286	3.51601	3.4096	3.00485	2.42416	2.90522
YER184C	2.63829	3.29932	3.44501	3.31356	3.20674	3.46313	3.47247	3.4717
YER185W	0.593038	0.477262	1.25163	0.148138	1.23923	0.869454	0.82231	1.15031
YER186C	3.00054	3.6854	3.49706	3.69711	3.50807	3.76823	3.73149	3.84273
YER187W	1.44888	1.61797	0.762188	0.414569	1.48833	0.834663	1.21693	0.838523
YER189W	0.291189	0.284769	-1.49978	0.134589	0.528662	0.300049	0.548214	-0.0801759
YER190W	-1.45885	-0.769401	-1.83266	-1.23102	-2.09705	-1.70822	-0.88963	-1.59963
YFL001W	3.88718	3.77625	3.93943	3.93647	3.68349	3.87994	3.86605	3.87932
YFL002C	3.5733	4.07952	4.08081	3.96187	3.91304	4.16659	4.22607	4.21337
YFL003C	0.669387	1.37222	1.16551	1.11107	0.831034	1.10253	1.12534	1.13323
YFL004W	4.88901	4.57886	4.63583	4.63592	5.41093	5.3116	5.34273	5.30904
YFL005W	4.92622	4.93978	5.03985	5.11268	5.10206	4.71785	4.6439	4.70339
YFL007W	3.86418	4.52941	4.359	4.43137	4.22974	4.42933	4.42869	4.44295
YFL008W	4.4916	4.68132	4.62133	4.73152	4.64739	4.40994	4.46502	4.43692
YFL009W	4.29031	4.31261	4.21359	4.0863	4.17207	4.11023	4.02047	4.11294
YFL010C	5.40273	3.59157	3.70945	3.71766	3.82368	3.25905	2.99953	3.32654
YFL013C	4.84079	4.63703	4.69015	4.64358	4.38114	4.33117	4.3771	4.34351
YFL014W	3.60233	-0.0587287	-0.289141	1.80333	2.1082	1.71935	3.33746	0.488868
YFL016C	6.06777	5.35031	5.27092	5.50296	5.31298	4.73633	4.62469	4.70824
YFL017C	5.03452	3.17642	3.23659	3.33979	3.44722	2.87332	2.56233	2.94615
YFL017W-A	4.5344	3.19121	3.60872	3.42484	3.44527	3.05696	2.3929	2.76994
YFL018C	4.3944	4.22408	4.16878	4.26202	4.20224	4.17841	4.19022	4.10833
YFL021W	4.96507	2.15438	2.74964	2.89694	2.92009	3.01847	2.92494	2.97155
YFL022C	4.51668	4.12495	4.17069	4.29547	4.38792	4.43577	4.40233	4.42173
YFL023W	4.5085	4.16594	4.2159	4.0121	3.84763	3.89659	3.93971	3.92422
YFL024C	4.12001	3.99733	4.08315	4.15242	3.71862	4.069	4.09805	4.05155
YFL025C	3.03462	3.54331	3.33153	3.42413	3.273	3.71013	3.73862	3.7075
YFL026W	0.469142	2.08824	1.99848	1.66004	1.47529	1.65089	1.64187	1.65737
YFL027C	2.89134	3.55946	3.48443	3.26331	3.27934	3.2092	3.13761	3.19708
YFL028C	3.28246	3.85934	3.84919	3.79447	3.87348	3.63472	3.45681	3.61224
YFL029C	3.52627	3.04983	3.00428	2.95599	2.9776	2.67915	2.39342	2.71446
YFL030W	1.12944	0.858651	1.02646	1.00107	0.683135	0.833526	1.15364	0.720232
YFL031W	5.09278	5.22506	5.40353	5.28082	5.51284	4.99651	5.01757	4.99732
YFL033C	4.14654	3.58264	3.6606	3.65664	3.6106	3.77998	3.77776	3.77184
YFL034C-A	4.47657	4.63805	4.80064	4.90235	4.41495	5.08365	4.89714	5.09777
YFL034C-B	5.39848	4.28853	4.22736	4.41322	4.10197	4.02756	3.9235	4.05222
YFL034W	4.14474	3.93962	3.94567	3.84452	3.66508	3.63078	3.67451	3.54061
YFL036W	3.97089	4.56484	4.37357	4.65251	4.4119	4.63489	4.6162	4.61461
YFL037W	5.15326	5.10364	4.91019	5.15353	5.18465	4.93519	4.86418	4.97089
YFL038C	6.21275	4.9057	5.061	5.20974	5.34041	4.63585	4.45564	4.63961
YFL039C	5.2385	6.01311	5.82145	6.02327	6.12138	6.17453	6.10978	6.1814
YFL041W	4.17666	3.81544	4.14917	3.53629	3.93712	3.7423	3.61382	3.74272
YFL041W-A	0.698552	2.42109	2.2878	2.01822	1.7059	2.0016	1.2051	1.96193
YFL042C	4.28498	3.4326	3.2847	3.2	3.21414	2.89736	2.93081	2.83805
YFL044C	4.05769	3.43646	3.37194	3.32187	3.26108	3.24459	3.09099	3.22387
YFL045C	4.78274	5.18456	5.20546	5.28724	5.46136	5.50009	5.34312	5.55104
YFL046W	5.1715	3.9662	4.15266	4.31172	4.05329	3.61236	3.69904	3.63507
YFL047W	4.78483	4.29279	4.14152	4.50497	4.16567	4.39758	4.43335	4.40482
YFL048C	4.11715	4.56653	4.54545	4.6037	4.638	4.3581	4.3216	4.29191
YFL049W	4.15721	4.30882	4.29207	4.29488	4.11566	4.02716	4.05603	4.01658
YFL050C	2.55264	3.17671	3.10607	3.1056	2.74051	3.25811	3.32415	3.29024
YFL052W	0.872796	0.402389	0.683949	1.62069	0.0538587	1.30192	1.38391	1.1467
YFL053W	-1.54076	-1.74423	-2.21071	-2.88289	-1.45792	-1.98482	-1.31115	-2.40115
YFL054C	2.79243	1.40759	1.31912	2.0532	1.48867	1.86177	1.76389	1.84105
YFL055W	1.29263	1.33299	1.25241	1.86979	1.25079	1.83243	1.6535	1.86118
YFL059W	0.74825	-0.0881097	0.1591	-0.533381	0.62911	-0.554205	-0.338422	-0.513015
YFL060C	0.982995	-0.0630148	1.23381	-0.769591	0.917087	0.388018	-1.43106	0.53786
YFL064C	0.29471	-0.288156	0.494218	0.347589	-0.90824	-0.425855	0.419453	-0.382031
YFR001W	5.70514	4.76451	5.02015	4.83215	4.91496	4.42334	4.22302	4.43999
YFR002W	4.58258	5.06612	5.01747	5.06464	4.90788	4.99172	4.96509	5.03002
YFR003C	5.05669	4.0572	4.108	4.38268	4.4054	3.47638	3.15864	3.28963
YFR004W	5.40313	5.24337	5.4057	5.54134	5.4883	4.95833	4.86274	4.99696
YFR005C	2.88179	4.19147	4.23109	4.38045	3.91402	4.36127	4.33396	4.32696
YFR006W	4.51124	4.27695	4.35958	4.57584	4.02444	4.40294	4.45511	4.34528
YFR007W	2.90909	2.64209	2.52065	2.78714	2.46817	2.58108	2.42168	2.55246
YFR008W	3.50388	3.82746	3.79038	3.92588	3.466	3.29928	3.36724	3.31126
YFR009W	4.61679	4.74357	4.69366	4.74258	4.81114	4.84683	4.84641	4.85898
YFR010W	4.99065	5.09667	5.03335	5.19121	5.13547	4.82544	4.79821	4.82633
YFR011C	5.21624	4.34158	4.33496	4.48282	4.32341	3.85942	3.86357	3.77844
YFR012W	0.470497	1.76637	1.14362	0.0105965	0.323728	0.417618	0.451946	0.804027
YFR012W-A	1.13695	1.76716	2.30812	0.20412	0.898904	1.91024	0.614579	2.60339
YFR013W	4.24975	4.30095	4.18868	4.2006	4.06262	4.0405	4.12445	4.0207
YFR014C	4.35523	3.73979	3.8846	4.10281	3.90066	3.54582	3.537	3.46339
YFR015C	3.33531	2.32226	2.05315	3.40993	2.81528	2.90178	2.69341	2.77859
YFR016C	4.96607	4.00162	3.86617	4.13365	3.81911	3.41812	3.4313	3.45391
YFR017C	3.85477	0.342982	1.32993	0.911764	1.45182	0.61574	0.64227	0.568976
YFR018C	3.38072	2.40366	2.13149	2.30836	2.36999	1.81156	1.79006	1.96855
YFR019W	4.56707	3.9986	3.90345	3.90537	3.72623	3.56777	3.56969	3.53154
YFR020W	3.51782	2.63076	2.44428	2.64024	2.60316	3.02219	2.71271	2.97253
YFR021W	3.82154	3.25707	3.10797	2.9552	2.91884	2.99521	2.97712	3.04598
YFR022W	2.40919	1.97104	1.96092	2.27619	1.4744	2.22569	2.24224	2.29832
YFR024C-A	4.34008	4.30969	4.58053	4.07086	4.44392	3.98835	3.79983	3.96708
YFR025C	4.22054	3.52125	3.55308	3.5286	3.58613	3.21787	3.06224	3.14271
YFR026C	2.58015	2.21285	1.72539	2.03714	1.05051	1.88188	2.01686	1.94935
YFR027W	3.93587	2.90385	2.85172	3.01135	2.66147	2.10426	2.13864	2.30533
YFR028C	4.59478	4.31677	4.30634	4.30114	4.24559	4.30507	4.24311	4.28025
YFR029W	4.43316	3.52712	3.85779	3.46558	3.33851	3.22137	3.15635	3.26041
YFR030W	2.8993	4.31554	4.16199	5.63162	4.67868	5.08788	5.00729	5.16296
YFR031C	4.21081	4.45093	4.41049	4.28636	4.21211	4.16872	4.30039	4.20364
YFR031C-A	5.63978	4.87006	4.87392	4.8321	4.93954	5.04096	4.9534	5.02007
YFR032C	-0.568071	-1.03001	-1.35839	-0.499438	-1.43686	-0.261159	-1.00527	-0.51649
YFR032C-A	6.77265	5.37934	5.44162	5.50838	5.34788	5.52556	5.32173	5.43149
YFR032C-B	4.35632	3.54833	4.40032	4.48847	4.33128	3.52658	3.2367	3.36337
YFR033C	6.82614	4.99382	5.29093	5.62179	5.63553	5.62975	5.63338	5.63601
YFR034C	5.24999	3.56512	3.92955	3.80222	3.90035	4.18136	4.30093	4.16745
YFR035C	0.358631	-1.13769	0.194786	0.402058	-0.48739	0.190979	-0.0742704	-0.0127346
YFR036W	4.28789	2.58842	2.91714	3.08877	2.59573	2.07085	1.22787	2.02169
YFR037C	5.42332	4.62056	4.68496	4.72611	4.67109	4.35837	4.43006	4.3464
YFR038W	4.24467	4.02941	4.00078	3.99985	3.91244	3.86582	4.02544	3.86323
YFR039C	4.37902	4.68185	4.80488	4.61182	4.7863	4.57632	4.53121	4.61421
YFR040W	4.97107	5.14322	5.06519	5.22609	4.95962	5.07298	5.14108	5.10475
YFR041C	4.5327	4.377	4.51431	4.39964	4.62459	4.04359	4.02947	4.11159
YFR042W	4.0111	4.16798	4.38943	4.17876	4.35414	3.82556	3.61883	3.79636
YFR043C	3.33548	3.22476	3.1625	3.11323	2.97765	2.84226	2.59623	2.96812
YFR044C	3.55142	4.16033	4.01194	4.18872	3.76678	4.08892	4.08917	4.0725
YFR045W	2.93771	3.40333	3.27937	3.55772	2.93299	2.99862	3.0069	2.87547
YFR046C	3.44582	3.42039	3.6483	3.65538	3.28437	2.90284	3.09238	2.93551
YFR047C	3.37619	3.24495	3.2169	2.90705	3.10952	2.46275	2.34353	2.39089
YFR048W	3.58544	4.10719	4.10117	4.09161	3.91449	4.09931	4.15842	4.09994
YFR049W	4.59532	4.01701	4.23433	4.34802	4.27901	3.78693	3.38883	3.76741
YFR050C	5.65913	4.99105	4.98976	5.08844	5.02477	4.76497	4.54775	4.75658
YFR051C	5.12266	4.41256	4.39635	4.45354	4.39746	4.25408	4.20143	4.20002
YFR052W	4.70496	5.08877	5.25273	5.39798	5.336	5.09884	5.00576	5.14981
YFR053C	4.63152	2.27042	2.12608	4.52869	3.87553	4.22807	4.20455	3.80713
YFR055W	3.05359	2.81309	2.93278	3.02805	3.03717	3.60386	3.54868	3.615
YGL001C	3.48892	3.61413	3.91147	3.83347	4.00748	3.61037	3.43323	3.65357
YGL002W	3.54382	4.02647	3.96264	4.0648	4.02903	3.86343	3.6876	3.76399
YGL003C	3.90278	3.90852	3.88359	3.69102	3.47967	3.61588	3.67795	3.62035
YGL004C	4.39779	3.72384	3.81343	3.83038	3.63788	3.24291	3.35372	3.25346
YGL005C	4.75763	4.25591	4.27307	4.26956	4.11533	3.79379	3.67135	3.76652
YGL006W	3.84829	3.95465	3.91807	4.21886	4.0026	3.89855	3.80958	3.89607
YGL006W-A	4.01971	3.93716	3.94336	3.94326	4.19517	3.45406	3.80521	3.08834
YGL007C-A	0.958674	4.14696	3.81012	3.5223	3.19245	3.26399	3.0156	3.43969
YGL008C	6.09017	7.29865	7.1354	7.3139	7.40117	7.98991	8.116	7.92375
YGL009C	5.61907	4.46229	4.02649	4.7069	5.31089	4.8495	4.72043	4.8425
YGL010W	3.57186	4.08933	4.00281	4.03572	4.13821	3.43124	2.9682	3.29517
YGL011C	5.25222	5.14469	5.23994	5.27889	5.23219	5.01632	4.94916	4.96257
YGL012W	4.31737	3.84848	4.15031	3.97839	4.28245	4.17409	4.18535	4.15799
YGL013C	4.58344	4.57448	4.53726	4.6206	4.46587	4.49227	4.55947	4.49558
YGL014W	5.44732	4.68079	4.57572	4.67009	4.48505	4.81465	4.87038	4.84189
YGL015C	0.220194	0.0367166	-1.56296	0.466428	-0.640775	0.377418	-0.207037	-0.143355
YGL016W	2.78403	3.58751	3.49265	3.70914	3.3122	3.81372	3.83075	3.78827
YGL017W	3.07151	3.12243	3.00511	2.8825	2.87433	2.78674	2.57107	2.77374
YGL018C	3.79122	3.08467	3.51955	3.31801	3.28504	2.65024	2.51576	2.60647
YGL019W	4.9701	4.00968	3.98299	3.98422	4.15417	3.66764	3.62078	3.69333
YGL020C	4.3359	4.40715	4.57195	4.54128	4.52442	4.17212	4.08972	4.18184
YGL021W	5.14835	4.08369	4.11698	4.05237	4.20008	4.31858	4.28719	4.35225
YGL022W	4.39062	4.31961	4.11342	4.07931	4.21338	4.26882	4.24353	4.24382
YGL023C	5.25364	3.86405	3.95754	3.74697	3.84223	3.46395	3.49963	3.44333
YGL025C	5.04688	3.67647	3.68123	3.7404	3.49988	3.1019	3.024	3.08955
YGL026C	4.85716	4.81083	4.82365	4.79531	4.88699	4.77095	4.72411	4.74879
YGL027C	3.66208	3.88561	3.91577	3.98878	3.93022	3.85714	3.81203	3.86934
YGL028C	5.50026	5.66824	5.71489	5.56955	5.18846	5.76865	5.88257	5.76755
YGL029W	5.8937	4.94073	5.25886	5.05685	5.20721	4.5254	4.36139	4.63528
YGL030W	4.83167	5.42072	5.49472	5.52069	5.35717	5.6155	5.42142	5.65731
YGL031C	5.108	5.7345	5.86168	5.83795	5.74584	6.05139	5.98575	6.07284
YGL033W	0.844699	0.565074	0.621019	0.210687	0.635316	-0.285164	-0.892079	-0.403299
YGL035C	5.14819	3.96369	3.87415	4.0648	3.85181	4.10519	4.12413	4.11467
YGL036W	4.62195	4.41245	4.26069	4.52146	4.37973	4.21859	4.19218	4.23302
YGL037C	6.22279	5.13067	5.20689	5.79556	5.96123	4.71989	4.4781	4.63474
YGL038C	4.52374	4.44061	4.58108	4.76664	4.285	4.83483	4.83652	4.81433
YGL039W	3.08848	4.5892	4.89366	4.29672	4.47907	3.9502	3.69822	3.90631
YGL040C	4.60266	4.29868	4.4837	4.4171	4.50395	4.25168	4.18785	4.16929
YGL041W-A	4.20476	4.33285	4.57853	4.56704	4.49043	3.9561	3.7985	4.03179
YGL043W	5.16619	4.87621	5.06073	5.06631	5.13451	4.4331	4.54159	4.43507
YGL044C	5.00504	3.97894	4.1116	4.02309	3.89771	3.82588	3.78119	3.86667
YGL045W	3.2538	2.67317	2.86219	2.73699	2.58946	2.35845	2.51263	2.415
YGL047W	4.36623	3.54155	3.4401	3.58478	3.83282	2.62528	2.73855	2.55552
YGL048C	4.64087	4.91755	4.91756	5.16243	5.12015	4.74613	4.60548	4.75266
YGL049C	5.55259	4.42555	4.32269	4.4836	4.3044	4.09411	4.1743	4.0864
YGL050W	4.37255	3.75495	3.68406	3.79685	3.52321	3.59821	3.35739	3.60358
YGL051W	-1.5578	-1.1917	-0.467799	-1.89831	-1.22629	-0.747742	-0.790407	-0.728871
YGL053W	3.66072	2.25581	2.55673	2.78408	2.14171	2.32545	2.41388	2.35654
YGL054C	4.23711	5.60318	5.70889	5.86741	6.20341	5.77856	5.54446	5.83277
YGL055W	2.9415	3.62721	4.45464	3.12312	4.47244	4.87211	5.06985	4.85937
YGL056C	4.93466	4.37514	4.55447	4.31806	4.23903	4.41648	4.41989	4.42616
YGL057C	2.75664	3.762	3.76766	3.77802	3.70548	3.51952	3.47553	3.5243
YGL058W	5.5539	5.37099	5.67472	5.65086	5.74651	5.11251	4.96516	5.11398
YGL059W	3.93669	4.17837	4.15169	4.1058	3.91234	3.75829	3.61901	3.7869
YGL060W	3.02649	3.9214	3.90732	4.02165	3.80961	3.90305	3.97602	3.9625
YGL061C	4.43055	3.92445	4.01996	4.24816	4.15127	3.49195	3.45786	3.36366
YGL062W	5.08468	2.92717	3.2802	3.44408	4.02431	3.61035	3.36194	3.49709
YGL063W	3.12761	2.34266	2.25472	2.39926	1.72694	1.84646	2.02725	1.75564
YGL064C	3.62461	3.68464	3.68603	3.54181	3.16991	3.51845	3.51947	3.55226
YGL065C	3.33735	4.14305	4.07624	4.11766	4.21126	4.15348	4.06425	4.16154
YGL066W	5.00675	4.36086	4.59176	4.44946	3.99605	3.98348	4.07711	3.96369
YGL067W	2.90824	3.75028	3.65561	3.75436	3.5708	3.67704	3.52127	3.69266
YGL068W	4.78944	4.82032	4.9905	4.97597	4.90645	4.44365	4.37088	4.54004
YGL070C	5.63302	4.71129	4.93711	4.90409	4.94476	4.49085	4.28085	4.57527
YGL071W	5.00471	4.69319	5.00377	4.51266	4.50842	4.69461	4.63625	4.62187
YGL073W	5.17068	4.3846	4.47055	4.49202	4.14682	4.05522	4.11486	4.07507
YGL075C	3.74822	3.39681	3.40522	3.1582	2.94597	3.1426	3.09355	3.03629
YGL076C	4.07529	4.21396	4.23144	4.16419	4.07445	4.49713	4.42527	4.47745
YGL077C	4.18636	5.20976	5.3101	4.30247	5.16332	4.59515	4.52764	4.59318
YGL078C	4.48757	4.77675	4.85188	4.81895	4.89434	5.09695	5.14346	5.11936
YGL079W	3.7104	3.72035	3.86224	3.70576	3.92718	3.53645	3.23886	3.58418
YGL080W	4.34804	4.65992	4.86889	5.00067	4.7081	4.47572	4.16271	4.5131
YGL081W	1.15803	-0.304054	0.495813	0.917329	1.31081	0.558598	0.400481	0.677966
YGL082W	5.20464	4.4976	4.4819	4.66683	4.56543	4.2508	4.08956	4.22922
YGL083W	3.94181	3.71792	3.57426	3.72425	3.67322	3.60217	3.61718	3.61183
YGL084C	4.05098	4.21513	4.29627	4.21926	4.39335	4.1649	4.07964	4.14569
YGL085W	3.18912	3.23336	3.1709	3.14852	3.31095	3.07235	3.09311	3.02152
YGL086W	4.64243	4.77664	4.82435	4.89504	4.7339	4.45048	4.4651	4.53129
YGL087C	4.81452	3.22503	3.47547	3.26357	3.52789	2.42253	2.32648	2.21015
YGL089C	5.12682	3.56399	3.82311	6.83598	5.91571	6.85742	6.80945	6.78455
YGL090W	4.55038	4.53139	4.67941	4.31976	4.58006	4.06367	4.09377	4.14804
YGL091C	4.29712	4.44301	4.76153	4.52894	4.63292	4.08481	4.02103	4.09174
YGL092W	4.79448	4.82521	4.73505	4.79944	4.78494	4.99392	5.04496	4.99909
YGL093W	4.35465	3.81777	3.83719	3.82988	3.79485	3.6119	3.66858	3.60652
YGL094C	4.05948	4.51539	4.3683	4.4969	4.35806	4.33824	4.38004	4.31239
YGL095C	4.76154	4.34797	4.35534	4.30112	4.21839	4.07685	4.06706	4.01744
YGL096W	4.07455	2.7526	3.18191	3.2678	3.01425	2.96632	3.0774	2.96671
YGL097W	5.12746	4.17045	4.23891	4.0696	4.2721	3.80618	3.577	3.79363
YGL098W	4.13681	4.0801	4.02161	4.15163	3.97039	3.86405	3.79637	3.8498
YGL099W	3.81936	4.21595	4.1528	4.08209	4.19799	4.28354	4.37371	4.36021
YGL100W	4.6165	3.94554	3.83042	3.7847	3.97338	3.52585	3.63312	3.53125
YGL101W	4.57996	4.56053	4.5312	4.76245	4.86432	4.27493	4.1595	4.26897
YGL103W	4.53127	5.26122	5.26805	5.24002	4.90827	5.62142	5.4573	5.64961
YGL104C	1.98624	1.79447	2.27195	2.04172	1.99046	1.8121	1.312	1.64471
YGL105W	5.4094	5.42093	5.38125	5.51931	5.49253	5.33644	5.27694	5.34054
YGL106W	5.56383	4.43537	4.54282	4.7602	4.76416	4.30298	4.25765	4.28247
YGL107C	4.14319	4.52207	4.44494	4.47101	4.25864	4.53359	4.50198	4.56132
YGL108C	5.94475	4.4984	4.86669	4.78943	4.61888	3.62035	3.42039	3.55743
YGL110C	4.28037	4.27702	4.12676	4.23797	4.05443	4.01704	4.01508	4.04716
YGL111W	4.33009	4.32547	4.29771	4.18751	4.10495	4.33213	4.28836	4.33746
YGL112C	4.03811	4.36297	4.2685	4.2532	4.15037	4.24378	4.33839	4.21744
YGL113W	3.01898	3.64354	3.69676	3.62571	3.15409	3.4662	3.44384	3.44607
YGL114W	5.11132	4.75286	5.04344	4.587	5.09981	4.96513	5.03524	4.97938
YGL115W	4.16259	4.78093	4.73203	4.60815	4.91433	4.38687	4.2983	4.34506
YGL116W	4.25075	4.00611	4.1272	3.86904	3.74797	3.92511	3.89497	3.95868
YGL117W	3.85069	4.41901	5.06957	5.10977	4.67618	4.80773	4.63337	4.77839
YGL119W	3.989	3.58223	3.74776	3.45792	3.47153	3.32462	3.43119	3.37156
YGL120C	4.10813	4.57348	4.64501	4.43179	4.49896	4.88798	4.97022	4.9116
YGL121C	1.67387	1.19455	1.62482	2.5855	2.10905	1.18063	1.32885	0.793389
YGL122C	5.51622	5.01812	5.16461	5.19593	5.26556	4.87911	4.84184	4.88014
YGL123W	5.9204	6.11032	6.16829	6.12349	6.00483	6.21533	6.17915	6.20606
YGL124C	2.86504	3.29763	3.25178	3.24955	3.02633	3.30488	3.32366	3.30976
YGL125W	4.91097	4.35399	4.46397	4.28089	4.13567	4.06016	4.06898	4.06791
YGL126W	3.39024	2.44803	2.56285	2.42221	2.50728	2.20885	1.90264	2.18857
YGL127C	5.43495	3.45118	3.65544	3.62902	3.20233	3.25153	3.20105	3.24543
YGL128C	4.78146	2.75149	2.97597	3.05098	2.81704	2.55022	2.38592	2.53232
YGL129C	5.24995	4.37883	4.4066	4.5688	4.26043	4.32643	4.22136	4.36358
YGL130W	3.77067	3.82525	3.93751	3.8829	3.57158	3.60873	3.62296	3.62271
YGL131C	3.5678	4.07109	3.86543	4.00303	3.62494	3.82493	3.8014	3.81752
YGL133W	3.90216	4.06445	4.12976	4.17261	4.06412	4.10454	4.13113	4.08628
YGL134W	3.78983	3.56558	3.6768	3.70799	3.3743	3.6307	3.58724	3.62573
YGL135W	4.67642	5.45624	5.79274	5.87409	5.74546	5.75056	5.70486	5.74531
YGL136C	3.56108	3.35293	3.42521	3.47761	3.24245	3.27628	3.06193	3.21559
YGL137W	4.85965	4.94207	4.84657	4.83497	4.8773	4.93067	4.95474	4.91847
YGL139W	3.69857	4.37279	4.22337	4.10035	4.16643	4.22385	4.14203	4.18946
YGL140C	3.71259	4.58616	4.44804	4.52058	4.46695	4.5972	4.66048	4.60807
YGL141W	4.43511	4.08618	3.87042	4.03901	3.869	3.74864	3.68629	3.72677
YGL142C	2.97494	3.66048	3.63941	3.79769	3.54076	3.81789	3.65967	3.81628
YGL143C	3.16514	3.11678	3.00885	3.29714	2.75098	2.95531	2.88911	2.86063
YGL144C	2.18837	3.29536	3.31871	3.09223	2.85937	3.41833	3.40811	3.44342
YGL145W	3.89433	4.47317	4.26624	4.2948	4.14694	4.155	4.09349	4.19978
YGL146C	2.29027	2.23836	2.63697	1.85672	2.45263	2.27231	1.89415	2.12515
YGL147C	4.56277	5.28352	5.39525	5.44919	5.32336	5.87663	5.70017	5.87896
YGL148W	5.06485	4.39439	4.456	4.26168	4.44368	4.2417	4.14841	4.2072
YGL150C	4.83386	4.67672	4.54489	4.68581	4.48494	4.5969	4.68513	4.64052
YGL151W	4.49384	4.61494	4.49686	4.66442	4.35546	4.54261	4.54997	4.53283
YGL153W	4.65778	4.27127	4.4081	4.20232	4.23539	3.43464	3.34874	3.45323
YGL154C	2.98801	3.08927	3.35423	3.05419	3.11189	2.48228	2.70822	2.35869
YGL155W	3.96036	4.31372	4.22557	4.37216	4.26815	4.27231	4.1592	4.22959
YGL156W	2.12927	1.85954	2.21509	1.56045	2.00104	1.31374	1.62937	1.2536
YGL157W	4.36479	3.76825	3.76699	3.87484	4.40476	3.72955	3.63505	3.75005
YGL158W	0.836357	1.44463	1.73238	0.575431	0.715533	1.00426	1.10036	0.991844
YGL159W	2.34966	3.87365	3.87145	3.86977	4.03615	3.79067	3.68798	3.85535
YGL160W	3.57561	3.75676	3.48992	3.72107	3.48249	3.4302	3.30262	3.41433
YGL161C	5.06651	4.14589	4.17141	3.95764	4.17487	3.72581	3.68072	3.69343
YGL162W	3.85266	3.34386	3.62551	3.60148	3.46708	3.63241	3.46837	3.59037
YGL163C	4.19802	3.83093	3.83226	3.79991	3.63263	3.58174	3.6363	3.6001
YGL164C	4.46494	3.98597	4.05067	4.07385	3.70362	3.6673	3.69831	3.71882
YGL166W	4.40604	3.32397	3.86153	3.40956	3.49635	2.98095	2.96044	3.00169
YGL167C	4.47304	4.8483	4.91702	4.81965	4.74981	5.07338	5.08466	5.06177
YGL168W	-1.12004	1.23137	0.660822	-0.0316241	0.639198	1.09338	0.87409	0.445719
YGL169W	2.76686	3.92375	4.06378	3.66444	3.86974	4.01807	3.95665	4.10584
YGL171W	3.51805	4.3432	4.33929	4.34282	4.11485	4.58782	4.62893	4.66688
YGL172W	5.10937	4.44556	4.38324	4.47669	4.39977	4.11416	4.09854	4.15361
YGL173C	4.85454	5.19896	5.05458	5.1809	5.07877	5.13377	5.1458	5.10897
YGL174W	3.92208	3.63939	3.67069	3.82794	3.46022	2.95022	2.86395	3.03084
YGL175C	3.17942	3.66282	3.4186	3.49759	3.36687	3.28716	3.33651	3.38015
YGL176C	3.6538	3.98881	3.98507	3.88539	3.45393	4.02943	4.00683	4.05284
YGL178W	4.2199	4.34571	4.27354	4.43078	4.05695	4.53494	4.4931	4.58013
YGL179C	2.20179	1.96568	2.25548	1.82465	1.78587	1.83852	1.92012	1.80137
YGL180W	3.87498	4.18602	4.31232	4.52257	4.10283	4.07607	4.02201	4.09429
YGL181W	5.41149	4.06494	4.21871	4.01341	4.18095	3.71622	3.56938	3.70906
YGL183C	1.27097	0.557553	1.00967	1.86887	1.21559	0.58322	0.859819	0.145374
YGL184C	2.10755	3.81782	4.05391	5.38827	4.03819	4.89083	4.99825	4.86429
YGL185C	3.55504	3.43998	3.29591	3.30021	3.32776	2.78722	2.70582	2.75825
YGL186C	3.75203	3.60596	4.09243	3.81859	3.80867	4.09319	3.96284	4.08423
YGL187C	3.03271	4.40007	4.19664	4.69618	4.30869	4.8551	4.56317	4.80583
YGL188C-A	4.54417	4.69422	5.33786	5.13674	4.80673	4.99209	4.76352	5.08851
YGL189C	7.11572	6.00675	6.09545	6.15246	6.01183	6.22229	6.18446	6.18832
YGL190C	5.20774	5.20859	5.17877	5.37753	5.08602	5.32739	5.36233	5.34862
YGL191W	4.67492	4.22883	4.19464	4.41972	4.23949	4.06783	3.91177	4.06113
YGL194C	3.98674	4.53401	4.68165	4.48902	4.25754	4.31669	4.36765	4.30999
YGL194C-A	3.53792	2.73129	2.21398	3.563	3.11197	3.32245	3.0155	3.22345
YGL195W	3.96231	5.29271	4.98881	5.12827	5.03685	5.21626	5.24262	5.20584
YGL196W	3.53734	3.63601	3.68574	3.92086	3.62491	3.4795	3.3369	3.37435
YGL197W	4.31862	4.23868	4.19213	4.43406	3.97957	4.1953	4.26764	4.20934
YGL198W	4.41684	3.17368	2.97243	2.83344	3.1528	2.42142	2.3817	2.30635
YGL200C	5.41659	4.38282	4.40055	4.44096	4.6277	4.38617	4.07688	4.3675
YGL201C	4.17308	4.25301	4.12015	4.2705	3.95765	4.2278	4.22285	4.24575
YGL202W	4.84479	4.87491	4.8706	4.89461	4.90713	4.75504	4.77272	4.7419
YGL203C	4.85708	4.05898	4.13297	4.20453	4.23413	4.20643	4.21832	4.20927
YGL204C	3.37916	2.40466	2.1522	2.12479	1.82515	1.95486	1.98982	1.71703
YGL205W	0.360984	-0.17305	-0.00424601	-0.857554	-0.0723871	-0.516851	-0.448843	-0.379061
YGL206C	4.69117	5.41745	5.22658	5.4239	5.38163	5.28587	5.30294	5.26192
YGL207W	4.90671	5.34515	5.22287	5.35951	5.23725	5.30818	5.36556	5.28538
YGL208W	3.96445	3.04963	2.73019	3.15986	2.43228	2.25521	2.20559	2.11453
YGL209W	4.86275	2.88852	3.34339	3.51915	3.72076	4.09023	4.15467	4.06077
YGL210W	4.65322	4.03633	4.19671	4.21429	4.11952	3.88604	3.73178	3.83445
YGL211W	4.22619	4.26434	4.25021	4.16631	4.00656	4.16658	3.98707	4.22301
YGL212W	4.33558	3.4675	3.63015	3.38136	3.46892	3.2197	3.12787	3.28192
YGL213C	3.74634	4.35094	4.25733	4.33779	4.37843	4.24751	4.26925	4.27122
YGL215W	5.62924	5.44459	5.39828	5.47354	5.35284	5.57317	5.62041	5.56942
YGL216W	4.57497	4.16651	4.16015	4.08469	4.00497	3.98861	3.9879	3.96218
YGL219C	5.23854	4.38284	4.29096	4.26825	4.3039	3.94313	3.91079	3.98284
YGL220W	5.96674	4.13032	4.35121	4.31374	4.4537	3.80327	3.62211	3.79966
YGL221C	4.42796	3.6062	3.77027	3.57769	3.92461	3.45061	3.21245	3.48034
YGL222C	6.07877	4.28395	4.4992	4.54049	4.16149	3.68799	3.55773	3.62211
YGL223C	3.96881	4.07104	4.15055	4.30895	4.07703	4.12961	4.06672	4.15307
YGL224C	4.50856	3.82646	3.88829	3.88815	4.22622	3.98979	3.86454	4.0277
YGL225W	3.95734	4.76014	4.60306	4.61534	5.0668	5.10042	4.88494	5.06763
YGL226C-A	4.44479	4.36269	4.27354	4.27045	4.46509	3.86338	3.45205	4.01414
YGL226W	4.77922	3.25513	3.2346	3.0355	3.33866	2.5547	2.41314	2.46024
YGL227W	4.1275	4.33995	4.15748	4.38334	4.26656	3.80677	3.88162	3.77189
YGL228W	4.93041	4.88992	4.96448	5.07872	4.99691	4.79542	4.81781	4.80906
YGL229C	2.80519	3.41532	3.15827	3.57466	3.10905	3.07078	2.95548	2.95879
YGL231C	4.74028	4.58849	4.7711	4.73583	4.46854	4.05041	3.80365	4.16281
YGL232W	3.48917	3.77011	3.65977	3.9743	3.64618	3.36643	3.21549	3.4167
YGL233W	3.38092	4.60796	4.475	4.66465	4.51899	4.63742	4.61929	4.63737
YGL234W	3.4895	4.16309	4.08252	3.86157	3.82704	4.01468	3.99275	4.01797
YGL235W	0.38165	-1.71536	-1.01329	-1.62567	-0.237736	-0.231165	-0.519909	-0.404674
YGL236C	3.39372	2.53045	2.40868	2.35343	2.0403	2.41424	2.45602	2.48296
YGL237C	4.39627	3.88949	3.88513	3.80216	3.72324	3.21581	3.10934	3.08606
YGL238W	4.06118	5.03007	4.92128	5.09113	5.01316	5.29804	5.28814	5.2794
YGL240W	3.97558	3.5228	3.13531	3.25696	3.09224	3.27091	3.30051	3.27551
YGL241W	2.99818	3.90472	3.91099	3.97451	3.93625	4.10654	4.1204	4.07948
YGL242C	4.90763	3.87843	3.87508	4.02144	4.19582	3.22861	3.16524	3.10474
YGL243W	3.35611	3.24217	3.20481	3.00377	2.85786	3.01613	2.8918	2.99061
YGL244W	5.99775	5.05559	5.07286	5.09787	4.99535	4.62528	4.65637	4.66302
YGL245W	4.01396	4.99624	4.86616	4.97183	4.95685	5.07859	5.11525	5.08777
YGL246C	3.97279	4.48743	4.62931	4.40614	4.56095	4.64517	4.54295	4.67819
YGL247W	3.47245	3.26674	3.5462	3.44278	2.59433	3.04319	3.01588	3.00694
YGL248W	4.69852	3.67222	3.65109	3.60803	3.89598	3.29146	3.20167	3.33736
YGL249W	-0.262808	0.682802	0.443164	0.32688	0.863651	0.932863	1.17569	1.0993
YGL250W	2.84123	3.01534	3.18975	3.20486	2.99135	2.61753	2.68931	2.39309
YGL251C	2.05275	2.28302	2.05605	1.02266	2.01981	1.55823	1.51475	1.69419
YGL252C	4.92136	4.91538	5.05378	4.92853	4.89362	4.67545	4.62728	4.68143
YGL253W	5.84415	6.22994	6.24905	6.15483	6.64724	6.66281	6.55128	6.61869
YGL254W	3.82721	2.97045	3.29974	3.61335	2.92011	3.42042	3.21165	3.59699
YGL255W	5.96655	6.2562	6.83934	2.6692	6.3901	3.52563	3.32907	3.61431
YGL256W	3.24586	3.86585	3.85249	3.58601	3.85282	4.16156	4.09616	4.15737
YGL257C	3.3378	3.81598	3.76628	3.6226	3.8714	4.02729	3.91769	4.01069
YGL258W	-1.38032	-0.456384	0.252774	-0.175184	0.292802	0.40481	0.0276525	0.673371
YGL263W	-2.66	0.633005	1.42585	1.81303	0.943702	-0.560307	-1.27417	-1.21263
YGR001C	3.82228	3.8597	4.12404	4.32589	4.05852	3.89368	3.67458	3.91471
YGR002C	4.04329	4.25242	4.30308	4.22402	4.05187	4.06557	4.08979	4.08688
YGR003W	3.57196	4.05503	4.05445	3.75331	3.79281	3.80652	3.91044	3.81203
YGR004W	3.05993	3.4457	3.48724	3.2859	3.14327	3.2831	3.1778	3.31874
YGR005C	4.74124	4.37921	4.407	4.42703	4.37803	3.90587	3.96342	3.9712
YGR006W	3.59086	3.81417	4.14539	4.06835	3.81999	3.59613	3.62091	3.61434
YGR007W	4.70413	4.34318	4.37977	4.29435	4.16401	4.15777	4.10622	4.14836
YGR008C	5.44636	3.94353	4.84378	4.8334	4.90793	3.32605	3.36332	3.20419
YGR009C	5.31845	4.78056	4.96129	4.8386	4.76411	4.26817	4.40167	4.28171
YGR010W	4.26594	4.10625	4.65005	3.82163	4.31935	3.48348	3.48887	3.49774
YGR012W	3.90981	3.71414	3.76498	3.63637	3.61536	3.42371	3.31007	3.47134
YGR013W	4.36715	4.01837	4.03274	4.10379	3.90965	3.64405	3.6555	3.68082
YGR014W	5.3716	4.09543	4.03799	4.40644	4.2644	4.70363	4.68027	4.66923
YGR015C	3.00744	3.40872	3.39257	3.35428	3.24322	3.06887	3.03762	3.01978
YGR016W	2.55359	3.61031	3.75472	3.69499	3.41095	3.53458	3.48413	3.56696
YGR017W	5.2345	4.90877	5.1185	5.19602	5.23318	4.77154	4.62583	4.86167
YGR018C	1.76421	0.228348	0.23937	0.641632	-0.465571	1.26065	1.355	0.958666
YGR019W	3.9382	3.20763	3.42668	3.62721	3.68547	3.06612	2.91635	2.97719
YGR020C	5.31196	4.90198	5.2718	5.36073	5.31881	4.74679	4.74526	4.75354
YGR021W	5.23963	3.58106	3.55754	3.74984	3.43675	2.92512	2.75479	2.86496
YGR023W	4.82299	3.22529	3.61288	3.38555	3.39508	3.3417	3.31285	3.34099
YGR024C	4.06656	4.09255	4.10636	4.17809	4.23305	3.78433	3.74292	3.8309
YGR026W	3.51309	4.60697	4.77948	4.88373	4.80178	4.78442	4.64347	4.82374
YGR027C	5.82581	6.07217	6.19685	6.27422	6.20493	5.97989	5.76253	5.97861
YGR028W	3.21536	3.90721	3.88515	3.866	3.89132	3.49824	3.44927	3.47003
YGR029W	3.57825	2.69398	3.0283	3.1075	2.9551	2.61002	2.05704	2.49706
YGR030C	3.10259	4.08222	4.46014	4.25837	3.96363	4.15707	3.89599	4.12712
YGR031W	3.92445	2.74752	3.03963	3.06329	3.07022	3.16352	3.05621	3.13576
YGR032W	3.27736	3.73278	3.88318	3.56962	3.78196	3.82394	3.91832	3.82898
YGR033C	4.74041	4.63637	4.70305	4.78512	4.71045	4.66141	4.5913	4.66097
YGR034W	4.96134	5.01942	5.23199	5.2306	5.23443	5.51838	5.34303	5.53313
YGR035C	5.64884	4.2244	5.04994	4.68889	4.09856	4.73978	4.56518	4.77139
YGR036C	4.09715	3.85644	4.05117	3.88846	3.96326	4.14752	3.9654	4.0225
YGR037C	5.61439	5.27829	5.50929	5.51065	5.58306	5.25784	5.04021	5.28585
YGR038W	3.5754	4.43321	4.49871	4.49884	4.54875	4.27101	4.02215	4.21116
YGR040W	4.34807	4.48951	4.77571	4.62778	4.42448	4.732	4.81746	4.76108
YGR041W	4.25149	3.40812	3.67726	3.3614	3.58077	3.79052	3.73089	3.74819
YGR042W	4.86013	3.88683	4.07015	4.09778	3.6417	3.60297	3.32344	3.56116
YGR043C	1.35203	1.55406	1.95039	0.495504	1.32734	0.5129	0.560804	0.194336
YGR044C	4.2397	2.91512	3.37983	3.1332	3.89412	3.28229	3.25717	3.26576
YGR046W	4.69894	4.21691	4.27045	4.29866	4.0139	4.19423	4.1179	4.19787
YGR047C	4.12668	4.26981	4.26109	4.276	4.13175	4.09178	4.15898	4.09311
YGR048W	4.83308	4.12345	4.25744	4.41665	4.25303	4.01477	3.88721	3.9512
YGR049W	4.57258	3.09971	3.35509	3.43709	3.43839	3.23289	2.91222	3.21707
YGR050C	4.58371	3.30916	3.44219	3.21489	3.41868	2.27636	1.76027	2.49737
YGR052W	4.38811	3.02068	2.92069	2.85094	3.78847	3.40891	3.68869	3.34092
YGR053C	2.48015	2.61809	2.58028	2.78778	2.72266	1.59914	1.45988	1.26122
YGR054W	5.21946	5.00428	4.90952	4.97469	4.95706	5.11235	5.06341	5.11144
YGR055W	5.65264	7.10857	7.07688	7.17159	6.68802	7.32939	7.39452	7.35326
YGR056W	4.65254	4.30872	4.3739	4.31574	3.90374	4.25812	4.3181	4.28244
YGR057C	3.3084	4.23077	4.40134	4.15563	4.26024	4.2049	4.06406	4.18483
YGR058W	4.0667	3.8369	3.83306	3.77883	3.55157	3.54688	3.54124	3.56817
YGR059W	-0.154815	-1.29678	-1.12643	-1.26893	-0.208346	-1.53736	-1.57616	-1.51033
YGR060W	4.55381	4.3723	4.89738	4.02272	4.6561	4.99327	4.97934	4.9569
YGR061C	3.85412	4.59259	4.61385	4.58251	4.621	4.84554	4.82416	4.84953
YGR062C	2.93954	3.09372	3.25991	3.26993	2.97219	2.82035	2.78975	2.89504
YGR063C	4.08927	4.50058	4.51803	4.42046	4.57428	3.72246	3.49946	3.73672
YGR065C	3.9352	4.53534	5.40685	3.99676	4.89417	4.83458	4.58527	4.79059
YGR066C	-0.138678	0.163776	2.55692	2.29473	-0.0381008	-0.739541	-1.01557	-0.94974
YGR067C	0.96141	0.741373	0.31878	0.528277	0.0378002	0.541917	0.115882	0.387719
YGR068C	3.87436	3.25394	3.30831	3.35302	3.08405	3.42618	3.38501	3.37595
YGR070W	3.16991	3.08728	3.00808	3.42187	3.19909	3.28451	3.18362	3.28658
YGR071C	3.4632	3.87645	3.85203	3.86599	3.48658	3.92281	3.8906	3.92826
YGR072W	4.67361	4.46017	4.60811	4.62235	4.52416	4.18582	4.10807	4.24603
YGR074W	5.2518	4.40224	4.74451	4.46333	4.34177	4.10485	3.9398	4.09509
YGR075C	2.43325	3.27986	3.44055	3.25066	3.0557	3.18772	3.02393	3.27507
YGR076C	4.03019	4.09762	3.96417	4.12442	4.20004	3.65286	3.25576	3.83178
YGR077C	3.93815	4.02724	3.87284	4.04126	3.78772	4.0415	3.99661	4.04769
YGR078C	5.1505	4.53521	4.76031	4.89985	4.72559	4.43155	4.43795	4.40389
YGR079W	3.94312	2.38565	2.96628	2.48167	2.42312	3.58753	3.49082	3.5244
YGR080W	4.21421	4.13997	4.23144	4.16062	4.05617	3.6973	3.53597	3.70088
YGR081C	5.39089	4.20375	4.47172	4.31441	4.2428	4.13834	4.03378	4.1647
YGR082W	4.67377	4.5356	4.46071	4.30789	4.70656	4.56729	4.23585	4.59559
YGR083C	5.31235	4.84742	4.85865	4.81253	4.70793	4.57011	4.60378	4.61124
YGR084C	5.12363	4.38269	4.51884	4.55192	4.36241	4.13352	3.93724	4.11908
[truncated: 3,471 more rows]
