# Supplementary material for: Two roles for the yeast transcription coactivator SAGA and a set of genes redundantly regulated by TFIID and SAGA
Source: eLife. 2020 Jan 8;9:e50109. doi: 10.7554/eLife.50109 (PMC6977968; doi:10.7554/eLife.50109)
Supplement: Figure 1—figure supplement 4—source data 1. — Table was used to plot the heatmap in Figure 1—figure supplement 4A. [file elife-50109-fig1-figsupp4-data1.xlsx]

## Sheet: sdS4A
gene_id	gene_name	Spt3_20_GC	Spt3_7_GC	Spt3_7_YPD	Spt3_del	Spt7_del	Spt20_del	Taf13_GC	Taf1_YPD	Taf7_YPD	Taf13_YPD	SGS
YLR109W	AHP1	-1.33489	-0.374501	-0.529806	-2.44952	-3.68372	-2.99639	-0.653262	-0.287279	-0.218624	-0.953177	0.145577
YHR179W	OYE2	-0.902867	-0.362166	-0.552765	-1.55072	-1.97753	-1.39798	-0.634455	-0.363773	-0.345184	-0.726756	-0.353278
YGR209C	TRX2	-1.05135	-0.825282	-1.06631	-2.22147	-2.1916	-1.83149	0.218668	0.17801	0.335258	-0.332492	0.642297
YOL151W	GRE2	-1.56753	-0.893803	-1.17509	-2.31681	-2.97543	-2.7684	-0.343379	-0.227656	-0.141557	-0.638299	0.501947
YGR192C	TDH3	-0.719875	-0.540739	-0.355305	-2.98626	-2.06767	-1.33837	-0.459031	0.0156529	-0.0241389	-0.423727	0.837885
YOL109W	ZEO1	-1.85357	-1.50146	-1.19514	-2.91629	-2.36762	-1.67458	-0.470145	-0.0201228	-0.125246	-0.627181	-0.464665
YLR110C	CCW12	-0.876246	-0.442795	-0.568089	-2.46484	-2.46103	-1.61932	-0.589609	-0.224193	-0.0537693	-0.361659	0.578654
YDL184C	RPL41A	-0.103038	0.185331	0.253851	-0.609496	-0.651107	-0.122374	-1.92834	-1.31294	-0.933639	-0.545384	0.032236
YDL133C-A	RPL41B	0.0727943	-0.0103405	0.084615	-0.314736	-0.526176	-0.236497	-1.45186	-1.50929	-1.44732	-0.310353	-0.391886
YGL008C	PMA1	-1.67529	-0.928085	-1.19758	-2.82962	-2.50996	-1.65816	-1.24371	-0.461034	-0.507676	-0.703904	-0.156527
YPL240C	HSP82	-0.746634	-0.534931	-0.584735	-3.54174	-2.93763	-2.47517	-1.61542	-1.65037	-1.97493	-1.81407	0.0711049
YMR186W	HSC82	-0.607706	-0.319269	-0.37347	-2.47579	-1.68127	-1.11699	-1.28557	-1.08879	-1.21372	-1.13209	0.244747
YBR244W	GPX2	-1.49125	-1.16647	-1.58719	-2.7243	-2.75041	-2.32275	-0.647078	-0.451571	0.0729052	-0.860356	-0.222424
YNL134C	YNL134C	-0.900622	-0.415455	-0.689582	-1.54557	-1.54012	-1.10935	-0.399621	-0.243575	-0.181677	-0.635422	0.663459
YHR174W	ENO2	-1.12731	-0.559424	-0.850144	-3.26076	-2.92375	-2.39931	-0.778648	-0.0310181	-0.100354	-0.484252	0.387514
YCR012W	PGK1	-1.32168	-0.862946	-0.981101	-3.36294	-2.89074	-2.32702	-0.320288	0.123465	-0.0204447	-0.49429	0.486664
YGR142W	BTN2	-0.268852	-0.160191	0.0707674	-3.48946	-2.99942	-2.70471	-2.16389	-1.89327	-1.97074	-2.35112	0.970006
YML028W	TSA1	-0.85955	-0.373795	-0.864449	-1.97105	-2.23372	-1.72804	-0.458927	-0.099008	-0.193029	-0.525532	0.152572
YOR298C-A	MBF1	-0.674389	-0.314172	-0.360688	-2.45833	-2.36849	-1.99419	-1.21733	-1.28684	-1.15249	-1.36801	0.432893
YLR075W	RPL10	-0.320241	0.0876307	-0.103077	-0.649369	-0.923596	-0.632657	-0.873959	-0.670294	-0.398471	-0.642942	-0.218266
YKL152C	GPM1	-1.33159	-0.770614	-0.884079	-2.68525	-2.43085	-1.9892	-0.406849	0.213745	0.126421	-0.34058	-0.170541
YML131W	YML131W	-1.24415	-1.00211	-1.18564	-2.40573	-1.91212	-1.66579	-0.304261	-0.24054	-0.109355	-0.537339	0.639598
YCR024C-A	PMP1	-1.02341	-0.782378	-0.939748	-2.56171	-3.00825	-2.14794	-1.71084	-0.681005	-0.267994	-1.03638	0.179091
YOR153W	PDR5	-1.75765	-1.65137	-1.43682	-3.64695	-3.94871	-3.70376	-1.18222	-0.690761	-0.565558	-0.802689	-0.434704
YPL187W	MF(ALPHA)1	-1.24096	-1.02291	-0.925605	-2.64972	-5.08619	-3.96243	-2.54966	-0.445668	-0.483623	-0.803705	-0.292183
YLR460C	YLR460C	-1.44679	-0.980658	-1.20903	-2.42876	-1.97365	-1.66502	-0.700599	-0.387952	-0.254283	-0.857862	-0.562059
YDR353W	TRR1	-0.684251	-0.469774	-0.752414	-2.09271	-2.37776	-2.17531	-0.289452	0.08162	0.0589066	-0.484759	0.000252466
YGR055W	MUP1	-1.20604	-0.765691	-0.379408	-1.4896	-1.30205	-0.904008	0.0838767	-0.388232	-0.131844	-0.78835	-0.381221
YJR104C	SOD1	-1.45522	-0.905276	-1.37087	-3.35608	-3.13918	-2.30744	-0.362413	-0.139502	0.128115	-0.537874	0.350236
YDR011W	SNQ2	-1.39718	-1.26514	-1.13022	-3.36166	-3.04405	-2.69138	-0.905264	-0.59682	-0.553193	-0.824506	0.112584
YNL031C	HHT2	-0.774278	-0.339152	-0.654666	-1.65955	-1.38217	-1.03949	-0.643316	-0.594206	-0.316416	-0.859717	0.212411
YGR155W	CYS4	-1.64184	-1.2543	-1.50301	-2.51164	-2.85612	-2.56326	-0.847603	-0.580932	-0.514491	-0.93805	-0.461744
YKL060C	FBA1	-1.52428	-1.09013	-1.29433	-3.22626	-3.3209	-2.74499	-0.382371	0.274553	0.2803	-0.143478	0.43149
YEL017C-A	PMP2	-1.0544	-0.773911	-1.11808	-2.06433	-2.51626	-1.87106	-1.43559	-1.13778	-0.70882	-0.836064	-0.268725
YAL005C	SSA1	-0.976007	-0.690611	-0.611936	-4.27861	-3.96071	-3.40295	-1.36905	-1.28544	-1.68856	-1.7005	0.439241
YPL061W	ALD6	-0.867553	-0.662206	-0.534668	-2.25857	-2.9665	-1.97373	-1.02939	-0.138074	-0.31443	-0.672702	0.208364
YJR045C	SSC1	-0.505277	-0.246038	-0.293678	-2.23698	-1.66095	-1.17621	-1.0319	-1.00284	-1.25873	-1.19796	0.670748
YAL038W	CDC19	-1.41481	-0.828821	-1.09251	-2.67463	-2.11354	-1.65306	-0.548116	0.0556726	-0.0655077	-0.327116	0.500005
YLL026W	HSP104	-1.21629	-0.754785	-0.768179	-4.34326	-3.29198	-2.78808	-1.83196	-1.42545	-1.80843	-1.87573	2.66506
YNL030W	HHF2	-0.909544	-0.479658	-0.74216	-1.77555	-1.61686	-0.922143	-0.551182	-0.389979	-0.121987	-0.88405	-0.0762491
YBR008C	FLR1	-1.78816	-1.22587	-1.59182	-1.79989	-2.25726	-1.85019	0.194081	-0.112472	0.146361	-0.504745	-0.0401134
YLR249W	YEF3	-0.625751	-0.286781	-0.559013	-1.20677	-1.75948	-1.32136	-1.46449	-0.999656	-1.03669	-0.771124	0.141484
YDR050C	TPI1	-1.47614	-0.873247	-1.09238	-3.04289	-2.62311	-2.22792	-0.396417	0.244119	0.468521	-0.234719	-0.0242643
YOR369C	RPS12	-0.0744804	0.143565	-0.033932	-0.344868	-0.798468	-0.339695	-2.24994	-1.75976	-1.4038	-0.816149	0.0221663
YGR234W	YHB1	-2.31902	-1.42689	-2.08047	-3.47452	-4.2862	-3.54613	-0.280527	-0.0458535	-0.198654	-0.540115	-1.71841
YER091C	MET6	-1.8284	-1.26948	-0.93175	-0.872183	-1.09534	-0.988846	-0.104678	-0.668867	-0.658065	-0.991894	-0.948138
YJL034W	KAR2	-0.803175	-0.534255	-0.600683	-2.73471	-2.1406	-1.56057	-1.35248	-0.84812	-0.972735	-1.01437	0.638315
YLR355C	ILV5	-0.680704	-0.274351	-0.734993	-1.35475	-1.24202	-0.959368	-0.666107	-0.337032	-0.335806	-0.780227	-0.532602
YCL026C-A	FRM2	-1.28837	-1.08593	-1.31395	-1.18119	-1.57515	-1.58454	-0.89866	-0.599733	-0.162712	-1.06708	0.239034
YIL053W	GPP1	-1.40135	-1.31166	-1.34579	-1.56192	-2.22169	-2.07589	-0.815931	-0.12735	0.00284379	-1.0994	-0.0685574
YDR224C	HTB1	-0.784363	-0.446571	-0.6549	-2.06444	-1.87073	-1.11448	-1.24551	-0.873392	-0.846178	-1.1335	0.120765
YDR225W	HTA1	-0.76328	-0.469977	-0.889646	-1.99755	-1.95919	-1.40195	-1.09786	-0.971588	-0.596061	-0.969868	-0.166041
YLR044C	PDC1	-1.22887	-0.773388	-1.23084	-2.33005	-1.93852	-1.54905	-0.455741	0.378919	0.252402	-0.108181	0.374163
YLR325C	RPL38	-0.212904	0.0382266	-0.157959	-0.97313	-1.4768	-0.785565	-2.58764	-1.72634	-1.76867	-1.38385	-0.102142
YLR108C	YLR108C	-0.570951	-0.442662	-0.204484	-2.53189	-2.21443	-2.02993	-0.330002	-0.309498	-0.320428	-0.75838	0.193948
YJR123W	RPS5	-0.248805	-0.0648617	-0.264147	-1.14901	-1.4071	-0.985638	-2.37708	-1.61673	-1.829	-1.01514	-0.621637
YNL178W	RPS3	-0.362059	0.0906211	-0.14035	-0.790407	-1.20543	-0.612017	-2.7123	-1.93524	-1.73403	-1.32537	-0.751133
YLR167W	RPS31	-0.175561	0.100617	-0.189407	-0.522775	-0.825905	-0.234276	-2.48053	-1.6586	-1.36697	-0.923042	-0.117371
YNL007C	SIS1	-0.385048	-0.19703	-0.211756	-2.51114	-1.80231	-1.37339	-1.4906	-1.35302	-1.37442	-1.60003	0.994225
YBR009C	HHF1	-1.26068	-0.719247	-0.921907	-2.29016	-3.15109	-2.10529	-0.960473	-0.580783	-0.346419	-0.886917	-0.283678
YHL015W	RPS20	-0.330731	-0.123066	-0.186586	-1.35964	-1.96256	-1.20145	-2.58611	-1.86369	-1.76483	-1.31639	-0.600111
YBR101C	FES1	-0.130372	0.145893	0.177009	-2.10982	-1.52803	-1.25477	-1.69923	-1.69182	-1.58202	-1.70666	0.312904
YNL064C	YDJ1	-0.305352	0.0333981	-0.182192	-1.6827	-1.5602	-1.12215	-1.62686	-1.49953	-1.63419	-1.55461	-0.169144
YOR020C	HSP10	-0.161454	0.258	0.14266	-1.36756	-1.32638	-0.975586	-2.32279	-1.99208	-1.73776	-1.94143	0.349518
YDL081C	RPP1A	-0.338828	0.0228181	-0.131387	-1.00107	-1.45825	-0.798202	-2.35563	-1.5841	-1.60481	-0.926068	-0.675441
YBL002W	HTB2	-1.20116	-0.635005	-0.670771	-1.90328	-2.23301	-1.2262	-0.485065	-0.207407	-0.273401	-0.465988	-0.15598
YEL009C	GCN4	-0.169095	-0.0324076	-0.1576	-0.859405	-0.705727	-0.28886	-0.780671	-0.612324	-0.55411	-0.719416	0.335835
YOR027W	STI1	-1.01477	-0.424392	-0.656051	-3.15612	-2.97381	-2.5486	-2.01716	-1.84109	-2.1527	-2.15302	0.538478
YHR055C	CUP1-2	0.469146	-0.0381187	-0.0952931	-1.64145	-0.479964	-0.657084	-0.0311196	-0.695069	-0.28823	-1.15348	0.750204
YDL124W	YDL124W	-2.28638	-2.20084	-2.27996	-3.58347	-3.62848	-3.34018	-0.657102	-0.218762	-0.245635	-0.772614	1.87317
YDL055C	PSA1	-1.43413	-0.965394	-1.15944	-2.18951	-2.66068	-2.21345	-0.689088	-0.0789593	0.0108072	-0.365227	-0.0595316
YEL034W	HYP2	-1.19753	-0.561541	-0.91133	-2.07503	-2.48655	-1.96887	-0.931911	-0.610595	-0.45288	-0.853138	0.210646
YBR010W	HHT1	-0.706708	-0.36909	-0.74086	-1.78847	-1.44726	-1.20506	-0.920461	-0.713416	-0.46793	-0.900709	-0.194252
YPL106C	SSE1	-0.243764	0.145214	0.144039	-1.40219	-1.55402	-1.10229	-2.20136	-2.03541	-2.06915	-1.69883	-0.217738
YEL071W	DLD3	-1.57304	-1.1258	-1.01306	-2.1635	-2.76014	-2.28664	-0.442261	-0.10426	0.00841145	-0.453886	0.02854
YAL003W	EFB1	-0.881632	-0.162158	-0.138462	-1.5805	-2.52752	-2.19622	-1.88683	-1.30221	-1.44229	-1.11429	-0.729553
YMR058W	FET3	-1.53651	-0.811915	-0.743612	-2.15224	-2.28752	-1.85391	-0.526031	-0.320575	-0.448661	-0.785812	-0.553122
YDR382W	RPP2B	-0.246425	-0.0247859	-0.196345	-1.1155	-1.40298	-0.842735	-2.27078	-1.83906	-1.90378	-1.15498	-0.0485466
YCR005C	CIT2	-1.22585	-0.734907	-0.793889	-1.38413	-1.18264	-0.850706	0.00466641	0.551949	0.756817	-5.78e-05	1.3845
YEL046C	GLY1	-1.20421	-0.589313	-0.791771	-2.35089	-2.26774	-1.84997	-0.743392	-0.294258	-0.277635	-0.756081	-0.123825
YLR441C	RPS1A	-0.272934	-0.0862712	-0.296003	-1.0337	-1.54861	-1.14537	-2.30226	-1.81578	-1.73675	-1.35461	-0.00903045
YOL086C	ADH1	-2.19317	-1.27239	-1.77267	-3.17203	-4.86613	-4.15962	-0.597681	0.259307	0.249074	-0.356792	0.281509
YMR318C	ADH6	-1.41934	-0.737823	-0.813339	-0.965654	-1.69897	-1.51061	-1.2735	-0.786525	-0.502348	-1.08755	0.214332
YPR149W	NCE102	-0.938725	-0.941867	-1.2501	-4.55961	-4.34637	-3.76773	-0.871651	-0.2938	-0.230493	-0.946061	1.49085
YKL096W-A	CWP2	-1.69731	-1.11437	-1.53494	-3.55036	-4.95951	-3.81551	-1.1228	-0.339473	-0.273678	-0.655081	1.13747
YKL056C	TMA19	-0.630516	-0.480498	-0.809151	-1.14193	-2.29759	-1.82911	-1.5235	-1.06656	-0.610193	-0.674636	-0.49833
YGL253W	HXK2	-0.758009	-0.50292	-0.6117	-1.43631	-1.5396	-0.919296	-1.0187	-0.278348	-0.284932	-0.609673	-0.161446
YLR259C	HSP60	-0.321219	-0.0414992	-0.252582	-1.89188	-1.51276	-1.13173	-1.82383	-1.546	-1.60542	-1.62493	0.953694
YPL131W	RPL5	-0.50715	-0.0692841	-0.273159	-0.964509	-1.58328	-1.06495	-2.55373	-1.69307	-1.61516	-1.33152	-0.551126
YBL003C	HTA2	-1.23881	-0.76053	-0.96677	-2.07379	-2.41618	-1.52637	-0.596777	-0.45632	-0.0509451	-0.660023	-0.0185409
YOR063W	RPL3	-0.57734	-0.148956	-0.434174	-0.885646	-1.50435	-1.17665	-1.48086	-0.992402	-0.992477	-0.978999	-0.248472
YDL020C	RPN4	0.50794	0.332209	0.617828	-0.779371	-0.560802	-0.491774	0.347336	-0.0947919	-0.240885	-0.50487	0.813687
YNL231C	PDR16	-1.44522	-1.15579	-1.11745	-2.59228	-2.78143	-2.47249	-0.187607	-0.0261961	0.0243156	-0.453795	-0.151821
YHR162W	MPC2	-0.733023	-0.655795	-0.532154	-2.06359	-1.66312	-1.58156	-0.878903	-0.589458	-0.599325	-0.995584	0.19132
YCL026C-B	HBN1	-1.2047	-0.810593	-1.2206	-0.812568	-1.4571	-1.13413	0.00585849	-0.210587	-0.151679	-0.707016	0.280767
YOL039W	RPP2A	-0.48622	-0.096151	-0.346415	-1.35553	-1.58196	-1.40194	-2.85412	-1.90095	-1.93783	-1.35566	-0.125236
YKL081W	TEF4	-0.338338	0.087771	-0.101141	-1.13912	-1.28228	-0.860423	-1.73475	-0.751617	-0.655607	-0.93902	-0.830674
YDL061C	RPS29B	-0.222121	-0.272666	-0.444845	-1.14051	-1.59516	-1.0933	-2.2331	-1.72487	-1.5911	-1.48331	-0.394935
YJL101C	GSH1	-0.998478	-0.647929	-0.715146	-1.8252	-2.16902	-1.96505	-0.58204	-0.516047	-0.423454	-0.836593	0.041757
YJL190C	RPS22A	-0.232981	-0.152958	-0.271962	-1.22998	-1.66484	-1.19494	-2.48791	-1.87579	-1.67307	-1.19036	-0.473159
YLR216C	CPR6	-0.380224	-0.126757	-0.388932	-2.53614	-2.05596	-1.6309	-2.03503	-1.81634	-1.90187	-2.08782	0.681461
YKR071C	DRE2	-0.458539	-0.00555427	-0.0505526	-0.914953	-1.28713	-1.09998	-0.782425	-0.786155	-0.599735	-0.964908	-0.311489
YOR302W	YOR302W	-1.16788	-1.15985	-0.116584	-1.7834	-1.5963	-1.16763	-0.240983	0.058513	0.231293	-0.758981	0.190363
YDR502C	SAM2	-1.80293	-1.1782	-1.09686	-3.47858	-2.81841	-2.53157	-0.886919	-0.722385	-0.622338	-1.19971	-1.03038
YDR033W	MRH1	-2.47575	-1.97867	-2.36857	-4.79835	-5.43438	-4.82979	-0.781057	-0.2774	-0.221614	-0.712308	0.0475547
YPR065W	ROX1	-0.652846	-0.520366	-0.046879	-1.73935	-1.5075	-1.19087	-0.199226	-0.0942162	-0.154501	-0.660962	0.612691
YLR340W	RPP0	-0.366052	-0.0102011	-0.289356	-1.03405	-1.2031	-0.809072	-2.28194	-1.54608	-1.44476	-1.32774	-0.163987
YLR264W	RPS28B	-0.0888762	-0.118165	-0.376452	-1.17027	-1.28273	-0.978752	-2.38597	-2.40704	-1.96114	-1.59936	-0.331171
YER131W	RPS26B	-0.242112	-0.141217	-0.318769	-0.994326	-1.66002	-1.20123	-2.76439	-2.00288	-1.89652	-1.48594	-0.181803
YBL092W	RPL32	-0.277301	0.0403437	-0.344941	-1.25189	-1.69084	-1.35685	-2.52869	-1.72072	-1.65185	-1.28384	-0.0705615
YJR009C	TDH2	-1.72121	-1.46242	-1.53738	-3.67217	-2.85988	-2.27613	0.301118	0.861113	0.995569	-0.148998	0.561806
YDR135C	YCF1	-0.46584	-0.451515	-0.564236	-1.34457	-1.18879	-0.868558	-0.281456	-0.338238	-0.212406	-0.382445	0.0201216
YPL250C	ICY2	-0.653147	-0.296734	0.201625	-0.625508	-0.365164	-0.337325	-0.323886	-0.0486475	-0.0240553	-0.47863	0.330839
YML063W	RPS1B	-0.313028	-0.133987	-0.272055	-1.37611	-1.83813	-1.18883	-2.54922	-1.8095	-1.64714	-1.18786	0.0822205
YCR102C	YCR102C	-2.03185	-1.42554	-1.54203	-2.89563	-2.84702	-2.49428	-0.776427	-0.594642	-0.404171	-1.06163	-0.279754
YGL255W	ZRT1	-1.95582	-1.35578	-0.0620604	-3.31367	-2.36245	-1.61996	-0.911255	-1.96756	-1.55876	-1.75715	-1.14418
YAL012W	CYS3	-1.2348	-0.691426	-0.713383	-1.1957	-1.94293	-1.70758	-0.659823	-0.523505	-0.620853	-1.17134	-0.246606
YBR196C	PGI1	-0.786111	-0.269135	-0.540774	-1.97158	-1.28585	-0.729548	-0.844086	-0.247112	-0.173587	-0.56717	0.322677
YGR027C	RPS25A	-0.330375	0.0222814	-0.216864	-0.89133	-1.32473	-0.930046	-2.38471	-1.6099	-1.41298	-0.967543	-0.261427
YER043C	SAH1	-0.697738	-0.351485	-0.476414	-2.48752	-2.21363	-1.86566	-2.10715	-1.76908	-1.70959	-1.57847	-0.322374
YMR251W-A	HOR7	-1.30543	-0.675693	-1.24653	-2.53611	-2.46207	-2.52893	-0.481433	-0.0424758	0.250293	-0.95716	2.83082
YML116W	ATR1	-0.798545	-0.526156	-0.926632	-0.710386	-1.16279	-0.986971	-0.546457	-0.717549	-0.404681	-0.877944	-0.262805
YJL159W	HSP150	-0.835459	-0.328919	-0.482986	-2.01278	-2.35325	-1.79154	-0.526097	-0.323026	-0.361438	-0.710723	1.25026
YGL123W	RPS2	-0.369749	-0.018302	-0.165659	-0.998667	-1.4466	-0.937667	-2.43082	-1.65056	-1.75523	-1.21481	-0.69784
YBR078W	ECM33	-1.14937	-0.753059	-0.95084	-2.16302	-2.33126	-1.60615	-1.00125	-0.526232	-0.444375	-0.864573	0.13876
YEL054C	RPL12A	-0.245505	-0.0445484	-0.359716	-1.0939	-1.47862	-1.06681	-3.0894	-2.10041	-2.01726	-1.46612	-0.149804
YGL189C	RPS26A	-0.421487	-0.141722	-0.216551	-1.13768	-1.56696	-1.22217	-2.27726	-1.46998	-1.52336	-0.909699	-0.196963
YER177W	BMH1	-1.38619	-0.586666	-0.673709	-2.94273	-2.82379	-2.19965	-1.09471	-0.833177	-0.605861	-1.16003	0.70079
YBR068C	BAP2	-0.665531	-0.34812	-0.525208	-1.36931	-1.17875	-1.21753	-0.0734036	-0.0466515	0.222836	-0.33684	0.232297
YHR143W	DSE2	-1.34382	-0.691539	-1.00476	-2.64056	-3.48807	-2.79849	-0.366149	0.0524178	0.0384295	-0.369403	-0.169247
YHR071W	PCL5	-1.37225	-1.33423	-0.839716	-1.79368	-2.45426	-2.30111	-0.516625	0.215477	0.183848	-0.313605	0.553975
YHR018C	ARG4	-0.241131	0.0652473	-0.0407394	-0.749065	-1.03469	-0.98884	-0.948671	-0.259892	-0.00535398	-0.478245	0.62084
YOR052C	TMC1	-0.369852	-0.544825	-0.859559	-1.22361	-1.28535	-1.06259	-0.207955	-0.631615	-0.877399	-1.24722	1.51512
YGR157W	CHO2	-0.402678	0.0402532	-0.0762816	-2.45352	-1.83323	-1.39328	-0.96278	-0.352314	-0.0983495	-0.492139	-0.19779
YGR148C	RPL24B	-0.215962	-0.173342	-0.219428	-1.32228	-1.69105	-1.38532	-2.84434	-1.70649	-1.79634	-1.34649	-0.258837
YOR167C	RPS28A	-0.217089	0.219805	-0.175054	-1.11042	-1.3686	-0.932698	-2.44119	-1.81754	-1.4935	-1.03214	0.00602122
YML130C	ERO1	-0.429155	-0.333837	-0.487936	-1.80648	-1.8603	-1.82103	-1.58369	-1.58706	-1.43461	-1.58003	0.305426
YDR258C	HSP78	-0.828383	-0.666813	-0.724105	-2.90389	-1.63856	-1.35566	-1.94198	-1.44187	-1.74222	-1.81656	2.44646
YMR307W	GAS1	-1.16998	-0.763688	-1.14396	-2.64635	-2.65735	-1.93959	-1.33763	-0.509986	-0.515859	-0.748614	-0.0555367
YLR286C	CTS1	-2.34289	-1.52235	-1.53815	-3.16821	-5.00193	-4.40599	-0.514751	0.170708	-0.0273306	-0.158107	0.0722957
YHL033C	RPL8A	-0.319962	0.0263032	-0.103252	-0.980541	-1.21905	-0.724967	-1.73821	-1.64961	-1.61605	-1.41439	-0.137283
YHR072W-A	NOP10	0.0184282	0.0822771	0.142467	-0.930744	-1.47176	-0.740205	-2.56972	-2.09416	-1.93591	-1.95636	-0.5936
YDR418W	RPL12B	-0.418713	-0.196316	-0.254532	-1.18034	-1.42655	-0.932434	-2.85134	-2.01468	-1.61369	-1.48602	-0.372607
YHR005C-A	TIM10	-0.115417	-0.0308843	-0.311221	-1.42452	-1.47037	-1.08715	-3.17483	-2.86297	-2.34	-2.34204	0.0628791
YFL039C	ACT1	-0.367253	-0.070516	-0.267746	-1.85214	-1.2997	-0.716398	-1.97644	-1.5712	-1.52674	-1.07374	0.541821
YDR513W	GRX2	-0.315677	-0.262213	-0.661706	-1.63712	-1.37707	-1.15015	-0.879528	-0.378834	-0.0772865	-1.16451	1.0262
YDL192W	ARF1	-0.334549	-0.290795	-0.164932	-1.41939	-1.53902	-1.11416	-2.42944	-1.82677	-1.61019	-1.44185	0.26168
YER145C	FTR1	-1.40874	-0.96878	-0.928667	-2.58743	-2.59412	-2.31023	-0.819502	-0.580546	-0.377172	-1.13764	-0.683747
YGL089C	MF(ALPHA)2	-1.30343	-1.58327	-0.90291	-1.28229	-6.80159	-6.43594	-3.38773	-0.238717	-0.325856	-0.329271	-2.38222
YDR037W	KRS1	-0.528166	-0.326027	-0.478589	-0.970847	-1.99818	-1.66069	-1.82057	-1.13987	-1.01478	-1.16831	-0.29242
YDR132C	YDR132C	-0.585873	-0.262494	-0.173272	-1.76036	-2.05965	-1.88722	-0.6888	-0.777674	-0.543297	-0.948882	-0.0819582
YDL147W	RPN5	-0.199519	-0.168897	-0.214491	-1.59908	-1.45641	-0.921183	-1.94146	-1.57247	-1.67171	-1.79245	0.176343
YLR333C	RPS25B	-0.238015	-0.211486	-0.203609	-1.54824	-1.73388	-1.2323	-2.93606	-2.35127	-2.16087	-1.55092	-0.488521
YOR198C	BFR1	-0.239887	-0.121507	0.00836012	-1.49702	-1.01238	-0.604642	-1.99274	-1.51367	-1.52795	-1.51664	-0.00975201
YPR145W	ASN1	-0.257542	-0.250784	-0.613563	-2.151	-1.60222	-1.32024	-1.06844	-0.124321	-0.0736969	-0.530172	-0.13807
YGR211W	ZPR1	-0.460702	0.00210044	-0.0877306	-1.82415	-2.05029	-1.6659	-1.83531	-1.65511	-1.75909	-1.72819	-0.573827
YER052C	HOM3	-0.213667	0.0704796	-0.198728	-0.527948	-1.33151	-1.20085	-1.12423	-0.790048	-0.634419	-1.17457	-0.100398
YLR197W	NOP56	-0.194091	0.00211632	-0.0510192	-1.23176	-1.54363	-1.01652	-2.87443	-2.03498	-2.00558	-1.70755	-0.590907
YKR042W	UTH1	-1.60851	-0.94986	-1.29071	-2.50001	-1.86032	-1.43238	-0.890577	-0.399558	-0.258629	-0.882077	0.173855
YML123C	PHO84	-0.128027	-0.979018	-0.890488	-6.39603	-11.3907	-7.73791	-1.10233	-0.878329	-0.728045	-1.1209	-2.01371
YER124C	DSE1	-0.769508	-0.481571	-0.227534	-2.15799	-2.79791	-2.17895	-0.493458	0.0829337	-0.152337	-0.170651	0.00708868
YBR118W	TEF2	0.0545974	0.124395	0.00296621	-1.2844	-1.26444	-0.805756	-1.17936	-0.860598	-0.849416	-0.464111	-0.0631086
YOL040C	RPS15	-0.357185	-0.0131982	-0.279144	-1.23233	-1.47503	-0.8555	-2.57882	-1.68039	-1.80446	-1.20908	0.216775
YLR293C	GSP1	-0.455763	-0.167867	-0.265987	-1.06511	-1.92416	-1.4782	-2.51047	-1.92048	-1.78461	-1.55917	-0.153091
YEL027W	VMA3	-0.600897	-0.197672	-0.485437	-1.27073	-1.5744	-1.07223	-2.60314	-2.12987	-1.63701	-1.35398	0.102258
YLR304C	ACO1	-2.09089	-1.17128	-1.95136	-3.15374	-4.1667	-3.69341	0.434588	0.382735	0.263441	-0.147106	0.644898
YGR282C	BGL2	-0.87877	-0.473923	-0.603895	-1.72613	-2.12281	-1.76559	-1.81624	-2.0853	-1.83351	-1.61856	-0.029262
YDL229W	SSB1	-0.460323	-0.0742086	-0.406141	-1.18788	-1.50368	-1.14495	-2.15302	-1.60289	-1.796	-1.12178	-0.181671
YKL216W	URA1	-0.274583	-0.0431319	0.0438981	-2.0062	-2.15438	-1.79948	-1.14813	-1.24113	-1.30939	-1.10593	-0.626511
YDR099W	BMH2	-0.184258	-0.05653	-0.13635	-1.6046	-1.09354	-0.672323	-2.04205	-1.68672	-1.75579	-1.43809	0.694646
YBR025C	OLA1	-0.334787	0.132584	0.0578087	-1.35311	-1.76675	-1.35583	-2.75287	-2.09856	-1.9041	-1.74493	-0.775211
YPL237W	SUI3	-0.221887	-0.0988407	-0.120527	-1.41496	-1.49198	-0.96408	-2.58424	-1.9261	-1.91774	-2.05225	-0.270518
YDR002W	YRB1	-0.47132	-0.270875	-0.323082	-1.07127	-1.66695	-1.36737	-2.31397	-1.76774	-1.76454	-1.48543	-0.113135
YDL182W	LYS20	-1.16102	-0.838142	-1.19963	-1.06468	-1.64543	-1.65505	-0.189987	0.0725785	0.148349	-0.494663	-0.307054
YGL031C	RPL24A	-0.329597	-0.139183	-0.178169	-1.23369	-1.81196	-1.29695	-2.93984	-1.76907	-1.6517	-1.35182	-0.183336
YMR309C	NIP1	-0.242201	-0.0307455	-0.0294345	-1.44685	-1.57083	-1.01465	-2.23687	-2.01677	-2.16292	-1.88009	-0.604265
YLL060C	GTT2	-1.4363	-1.32562	-1.44925	-2.13824	-1.58213	-1.64467	-0.471478	-0.463432	-0.504775	-0.758835	0.243171
YDR086C	SSS1	-0.16747	0.0415297	0.055676	-1.34892	-1.30432	-0.695212	-2.62504	-2.02078	-1.75128	-1.74188	0.196349
YDR276C	PMP3	-1.25449	-1.0814	-1.21051	-2.64002	-2.85543	-2.4779	-1.0294	-0.92656	-0.200649	-0.92181	0.555198
YDR533C	HSP31	-2.22941	-1.43324	-1.86756	-4.23431	-3.7199	-3.64585	-0.495815	-0.289314	2.92e-06	-0.599513	1.63501
YDR497C	ITR1	-0.895084	-0.817407	-0.289785	-3.85272	-2.09091	-1.60018	-1.50446	-0.945618	-1.03231	-1.22632	-0.247772
YLL045C	RPL8B	-0.248844	0.0547562	-0.311217	-1.04815	-1.55615	-1.10946	-2.61259	-1.71691	-1.69782	-1.31556	-0.733748
YLR214W	FRE1	-1.55841	-0.737031	-0.969346	-1.17331	-2.51921	-2.562	-1.15566	-0.910031	-0.473999	-1.0519	-0.589006
YDR155C	CPR1	-0.77675	-0.348814	-0.341341	-2.11918	-2.6201	-2.12662	-1.26892	-0.671709	-0.63126	-0.720796	0.613137
YDR171W	HSP42	-0.437779	-0.234542	-0.267153	-4.67759	-2.98514	-2.89912	-1.55545	-1.27625	-1.48279	-2.02738	3.63532
YLR150W	STM1	-0.334902	0.035445	-0.173198	-1.43478	-1.4892	-1.08699	-2.57487	-1.63092	-1.77584	-1.30679	-0.22824
YOR007C	SGT2	-0.197767	0.105562	-0.277781	-1.51941	-1.45719	-0.994722	-2.15065	-2.01259	-1.8876	-1.75865	0.189622
YDR363W-A	SEM1	-0.0961429	-0.091446	-0.0603756	-1.53939	-1.43042	-0.479075	-2.53926	-2.37072	-2.27047	-1.97297	0.313157
YDL232W	OST4	-0.359397	0.0368204	-0.154302	-1.54437	-0.951123	-0.542631	-2.08777	-2.09362	-2.03239	-2.05428	0.0835557
YGL054C	ERV14	-0.479193	-0.032266	-0.165602	-1.44297	-1.58524	-0.991028	-2.64832	-2.29157	-2.10282	-1.94122	-0.0812728
YNL209W	SSB2	-0.434537	0.0225333	-0.24101	-1.04599	-1.49209	-1.13527	-2.61486	-1.79479	-1.97724	-1.44157	-0.146619
YNL067W	RPL9B	-0.0379961	-0.0149368	-0.0265489	-0.958825	-0.902266	-0.463086	-1.64482	-1.2061	-1.10553	-1.08122	-0.598074
YOR136W	IDH2	-1.41694	-1.00683	-1.15033	-2.58142	-3.79494	-3.20067	0.270581	0.209071	0.333532	-0.167238	0.662139
YNL036W	NCE103	-1.62494	-1.3222	-0.793518	-1.08259	-1.6343	-1.54106	-0.199069	-0.374022	-0.240322	-1.41623	2.40117
YJR007W	SUI2	-0.201977	-0.0279907	-0.0939435	-0.955974	-1.30536	-0.875902	-2.19744	-2.06389	-1.85327	-2.03061	-0.507434
YPL037C	EGD1	-0.139058	0.0464852	-0.227569	-1.50601	-1.38906	-1.14594	-2.67862	-1.70649	-1.64159	-1.59635	0.150527
YIL138C	TPM2	-0.0539514	0.340165	0.197494	-1.11821	-0.417781	0.304866	-2.44629	-1.5934	-1.89966	-1.95748	0.231051
YOL139C	CDC33	-0.139729	0.0102956	-0.16551	-1.18768	-1.35219	-0.933033	-2.3389	-1.81017	-1.89674	-1.63328	-0.648294
YPR165W	RHO1	-0.370023	-0.149765	-0.310829	-1.91827	-1.47482	-1.17689	-2.25911	-1.74076	-1.78708	-1.78565	0.315744
YBR143C	SUP45	-0.167843	0.0703219	-0.116913	-1.39687	-1.29363	-0.843101	-2.53847	-2.04324	-1.99885	-1.88804	-0.399355
YPR035W	GLN1	-0.422111	-0.0260272	-1.07224	-1.81473	-1.17718	-0.919504	-1.32018	0.110538	0.0993503	-0.300902	0.171158
YNL281W	HCH1	-0.401983	0.2633	0.24032	-1.61741	-1.71643	-1.41654	-1.68478	-1.86765	-1.61759	-1.36972	0.257273
YER165W	PAB1	-0.362164	-0.0430789	-0.158935	-1.21742	-1.54343	-1.09025	-2.72171	-1.79083	-1.96832	-1.65987	-0.278049
YNL244C	SUI1	0.0873693	0.167225	-0.0529926	-0.63184	-0.967479	-0.675304	-2.39821	-2.18142	-1.83667	-1.75977	0.0483243
YDL084W	SUB2	-0.238961	0.0740245	-0.0605601	-1.90778	-1.37219	-0.981911	-2.12923	-1.4977	-1.59136	-1.48148	0.0350112
YMR038C	CCS1	-1.21015	-0.835946	-0.886731	-2.30132	-3.06004	-2.60571	-1.23972	-0.643669	-0.566447	-1.12076	-0.412548
YNL069C	RPL16B	-0.248911	-0.0166582	-0.273594	-1.21868	-1.60793	-1.25528	-2.60132	-1.62727	-1.65261	-1.39492	0.222583
YBR082C	UBC4	-0.360525	0.0164362	-0.0722535	-1.87054	-1.65623	-1.32366	-2.10094	-2.03016	-1.70655	-1.73046	0.399039
YBR079C	RPG1	-0.281756	0.00694591	-0.0643241	-1.51099	-1.32935	-0.93618	-2.17216	-1.9129	-2.23026	-1.73155	-0.64515
YOR226C	ISU2	-1.05467	-0.725763	-0.999214	-1.71605	-1.54987	-1.57116	-0.649037	-0.513865	-0.103772	-0.99464	-0.00459657
YLR043C	TRX1	-0.342406	-0.166425	-0.111497	-1.73725	-1.69918	-1.0456	-2.79054	-1.74457	-1.88647	-1.33471	-0.0482189
YPL091W	GLR1	-0.667376	-0.566215	-0.673532	-1.94776	-1.92108	-1.41874	-1.16889	-0.687591	-0.587503	-0.900964	0.308902
YOR383C	FIT3	-1.10947	-0.46993	-0.00465295	-1.25633	-2.73557	-2.76298	-1.12672	-0.965951	-1.25334	-1.13896	-0.28393
YMR260C	TIF11	-0.158308	-0.00567806	0.102085	-1.39637	-1.41152	-1.11148	-2.74626	-1.71872	-1.63265	-1.69272	-0.294547
YGL135W	RPL1B	-0.243797	-0.144941	-0.459111	-1.04588	-1.5533	-1.09659	-2.95344	-1.98131	-1.94205	-1.37256	-0.306149
YOR344C	TYE7	-0.308382	-0.646948	-0.00315344	-3.4025	-2.47891	-1.97931	-0.504116	-0.20647	-0.554097	-0.849765	-0.00350386
YJR109C	CPA2	-0.0688189	0.128517	0.0786799	-0.40202	-0.831291	-0.724478	-0.679894	-0.472958	-0.230416	-0.720807	0.827262
YKL172W	EBP2	-0.124445	0.141923	0.324562	-1.26566	-1.36898	-0.680505	-2.78174	-2.01439	-2.29759	-2.18198	-0.731597
YGR240C	PFK1	-0.982218	-0.625182	-0.903884	-1.96515	-1.74558	-1.47816	-1.4593	-0.80077	-0.77655	-0.946481	-0.0255424
YNL255C	GIS2	-0.107873	0.0743579	-0.110942	-0.728187	-1.46549	-1.16326	-2.32267	-2.13525	-1.98994	-1.90286	-0.369499
YPR158W	CUR1	-0.132466	0.15702	0.267649	-2.62962	-2.7371	-2.16384	-1.96786	-2.11558	-2.0476	-2.26064	0.877909
YBR189W	RPS9B	-0.251735	-0.167109	-0.11756	-1.34524	-1.4575	-0.993166	-2.23081	-1.63901	-1.70796	-1.24955	-0.123111
YPL225W	YPL225W	-0.0227812	0.0669283	0.166309	-1.48669	-0.643268	-0.0818402	-2.24002	-1.75651	-1.5339	-1.52977	0.26569
YNL327W	EGT2	-1.2579	-0.540072	-0.62617	-2.83446	-2.91518	-2.17869	-0.331408	-0.00127729	-0.211237	-0.327471	-0.345376
YGR085C	RPL11B	-0.35576	-0.0483828	-0.119028	-1.04411	-1.5215	-1.01777	-2.45577	-2.05301	-1.94486	-1.45102	-0.206909
YKL182W	FAS1	-0.9941	-0.781747	-0.541094	-3.51399	-2.82524	-2.225	-1.29797	-0.484408	-0.446702	-0.580487	-0.501076
YAL035W	FUN12	-0.262448	0.137877	0.129047	-1.57938	-1.37993	-0.657745	-2.15466	-1.71334	-1.8828	-1.5502	-0.3884
YHR008C	SOD2	-1.05349	-0.788236	-1.33887	-2.36883	-2.74544	-2.47634	-0.658286	0.0664437	-0.203733	-0.814287	0.98446
YER036C	ARB1	-0.528389	-0.181484	-0.398255	-1.34954	-1.78698	-1.4968	-3.12045	-2.54391	-2.47858	-2.0201	-0.55995
YLR346C	YLR346C	-1.33547	-1.76251	-1.68661	-2.75037	-2.80622	-3.39641	-0.542515	-0.597587	0.0792973	-0.572425	-0.0691027
YBR085C-A	YBR085C-A	-1.23236	-1.45296	-1.24317	-2.67136	-2.31352	-2.0582	-1.76343	-1.03182	-0.815135	-1.83031	3.4376
YLR300W	EXG1	-2.41955	-2.03283	-2.24432	-3.11995	-4.06967	-3.64068	-0.945928	-0.388925	-0.0910202	-0.613647	0.416064
YER048W-A	ISD11	0.136698	-0.0445411	0.150993	-0.617802	-0.96421	-0.557932	-1.95029	-1.7993	-1.93144	-1.99654	0.0488675
YOR096W	RPS7A	-0.100982	-0.0520218	-0.287756	-1.25722	-1.46853	-1.27529	-2.27493	-1.66003	-1.50747	-1.24647	-0.591479
YMR116C	ASC1	-0.438364	-0.123674	-0.532776	-1.31146	-1.87964	-1.45852	-3.08062	-1.89978	-1.62486	-1.22879	-0.464008
YOR210W	RPB10	-0.0684734	-0.048213	0.223612	-1.47116	-1.44058	-1.04188	-2.44212	-2.04522	-2.10984	-1.96331	-0.488243
YPL231W	FAS2	-1.0014	-0.677107	-0.657144	-2.89724	-2.12974	-1.60971	-1.70215	-0.646276	-0.655639	-0.782935	-0.0989637
YDR194C	MSS116	-0.063277	0.118108	0.0180528	-1.20449	-0.884596	-0.353679	-1.42179	-1.43996	-1.57964	-1.34273	-0.397577
YKL043W	PHD1	-1.24639	-0.891811	-0.495087	-3.19371	-3.32197	-2.49963	-0.21804	0.35076	0.028145	-0.331063	0.0916119
YDL168W	SFA1	-0.851101	-0.770999	-0.833054	-1.79081	-2.26579	-2.04227	-1.09334	-0.939133	-0.582683	-1.06902	0.220074
YML091C	RPM2	-0.53753	-0.514771	-0.549697	-1.51685	-1.4904	-1.38287	0.171129	0.246489	0.203718	-0.295335	0.784917
YER021W	RPN3	-0.298235	-0.252018	-0.397512	-1.74558	-1.53946	-1.17624	-2.16341	-1.87927	-1.88769	-1.92288	0.0828048
YNL079C	TPM1	-0.26253	0.0270964	0.109037	-1.61212	-1.48772	-0.664967	-2.5703	-1.36898	-1.5135	-1.15985	0.176638
YGL028C	SCW11	-0.7852	-0.339738	-0.349306	-1.76663	-2.87074	-2.06745	-0.436401	0.00995411	-0.192476	-0.312892	-0.327154
YCL050C	APA1	-0.227549	0.0705294	0.308916	-1.8753	-1.3983	-0.989127	-2.95525	-2.20372	-2.14049	-2.01312	-0.113193
YOR204W	DED1	-0.586869	-0.277793	-0.574951	-1.73488	-2.77922	-2.33916	-1.45991	-1.07697	-1.14774	-1.09912	-0.590575
YPL135W	ISU1	-1.04248	-0.567693	-0.743817	-0.762429	-2.47149	-2.40346	-0.125424	-0.346491	-0.0200437	-0.88193	1.03273
YNL131W	TOM22	-0.0993594	0.0611479	0.0181191	-1.47035	-1.12111	-0.491668	-2.15575	-1.6549	-1.75028	-1.67046	0.0403588
YML106W	URA5	-0.2027	0.0716562	-0.174541	-1.39793	-1.36624	-0.730038	-2.29129	-1.85457	-1.81315	-1.63416	-0.233338
YHR193C	EGD2	-0.554136	-0.0196569	-0.126789	-1.53223	-1.89508	-1.36458	-2.85922	-1.64234	-1.80437	-1.40285	-0.328113
YOL127W	RPL25	-0.336383	-0.120558	-0.316433	-1.07655	-1.66129	-1.19603	-2.51021	-2.03218	-1.70116	-1.16345	-0.112276
YLR372W	ELO3	-0.766628	-0.237827	-0.3909	-1.38552	-1.97191	-1.49841	-2.67996	-2.05722	-2.04796	-1.78522	0.119851
YOR382W	FIT2	-1.92224	-1.13544	-1.25224	-2.50812	-2.33005	-2.59374	-1.53656	-0.498792	-0.566143	-0.284816	-0.145611
YGR118W	RPS23A	-0.489174	-0.175966	-0.390278	-1.2358	-1.74297	-1.22599	-3.41151	-2.2924	-1.79051	-1.65474	-0.252977
YKL164C	PIR1	-1.1435	-0.289548	-0.255651	-2.28659	-2.78982	-1.85856	-0.472416	-0.211302	-0.408037	-0.598491	0.195263
YLR048W	RPS0B	-0.406459	-0.0685273	-0.257376	-1.3159	-1.71721	-1.11048	-2.68809	-1.85385	-1.90766	-1.54671	0.166338
YHR082C	KSP1	-0.364125	0.0247146	-0.00468569	-2.35138	-1.36424	-0.90293	-2.29923	-2.37825	-2.46031	-2.18973	0.422315
YLR175W	CBF5	-0.374228	0.0566611	-0.0892114	-1.2309	-1.75503	-1.1733	-2.96358	-2.25205	-2.42388	-2.03199	-0.85967
YGR254W	ENO1	-2.37401	-1.63357	-2.09107	-4.33787	-3.24543	-2.90286	0.354149	1.0603	1.08887	0.0217349	0.247331
YGR159C	NSR1	-0.373608	-0.144216	-0.368824	-0.275011	-1.93406	-1.6532	-2.06466	-1.44463	-1.43825	-1.50105	-1.12367
YCR021C	HSP30	-1.59431	-1.13498	-1.58423	-4.98252	-3.47799	-3.21313	-0.750599	-0.537259	-0.117111	-1.21981	1.1534
YEL040W	UTR2	-1.25437	-0.77862	-0.950877	-3.23894	-2.76365	-2.00424	-1.15634	-0.325395	-0.294004	-0.691224	-0.962939
YKL082C	RRP14	-0.127746	0.139434	0.397342	-1.08332	-1.35455	-0.677122	-2.39362	-2.06823	-2.22394	-2.01129	-0.545919
YBR109C	CMD1	-0.178512	-0.10749	-0.0593658	-1.60072	-1.20422	-0.710571	-2.05792	-2.03264	-2.19253	-1.60404	0.319314
YNL287W	SEC21	-0.30841	-0.0965837	-0.117873	-2.14184	-1.19116	-0.671763	-2.0753	-1.83749	-1.87254	-1.64544	0.0511708
YML058W	SML1	-1.18	-0.543724	-0.9782	-1.88348	-1.67533	-1.37006	-1.17356	-0.761104	-0.10649	-1.03715	0.129245
YDR071C	PAA1	-0.259564	0.0180851	-0.169785	-1.51816	-1.41949	-0.900077	-2.58587	-2.42518	-2.0503	-2.14023	0.0089379
YER025W	GCD11	-0.252106	0.149251	0.0593403	-1.42264	-1.3573	-0.862983	-2.2832	-2.03338	-2.01166	-1.74064	-0.396266
YDL243C	AAD4	-1.4685	-1.12498	-1.82185	-0.911811	-0.844358	-0.568835	-0.820813	-0.67726	-0.436091	-1.00685	-0.0552228
YLR136C	TIS11	-1.64098	-1.10012	-0.443093	-1.66677	-3.4	-3.57871	-0.475125	-0.871225	-0.520392	-0.880857	-0.140676
YBR011C	IPP1	-0.352586	0.0492429	-0.0991307	-0.533204	-0.700641	-0.337652	-2.21122	-1.64827	-1.68119	-1.43996	0.232214
YEL026W	SNU13	-0.448226	0.168699	0.00986617	-0.685312	-1.27662	-1.12326	-2.85898	-2.1079	-1.88689	-1.8137	-0.587362
YNL121C	TOM70	-0.192637	0.0288156	-0.00392768	-1.79287	-1.24505	-0.599517	-2.0252	-1.70561	-1.83686	-1.5925	-0.0515705
YDL126C	CDC48	-0.412927	-0.153607	-0.471303	-1.63882	-1.33907	-0.757723	-1.37412	-1.43888	-1.43293	-1.41767	0.631142
YPR132W	RPS23B	-0.406449	-0.178273	-0.261477	-1.15132	-1.74763	-1.16114	-2.77409	-1.7323	-1.433	-1.11959	0.308257
YBR162C	TOS1	-0.692401	-0.334983	-0.378797	-1.5906	-2.10319	-1.47129	-1.27813	-1.0174	-0.766805	-0.934687	0.0498632
YLR180W	SAM1	-1.77415	-1.10448	-1.25841	-2.1814	-2.85604	-2.58812	-0.805259	-0.806778	-0.738162	-1.31591	-0.924425
YPR133W-A	TOM5	-0.297118	0.0525114	-0.0774217	-1.39584	-1.32666	-0.905289	-2.10065	-2.02025	-2.161	-1.95044	0.10399
YJL148W	RPA34	-0.141979	-0.00555232	0.210644	-0.770005	-1.335	-0.993396	-2.49241	-2.36083	-2.07788	-2.32292	-1.08382
YGR264C	MES1	-0.192981	-0.0884693	-0.138651	-1.29512	-1.35901	-1.05105	-2.4129	-1.97981	-1.9306	-1.73226	-0.650654
YJL124C	LSM1	-0.279702	-0.0826195	-0.0128216	-1.73417	-1.28003	-0.963542	-1.80155	-1.83828	-1.80551	-1.73653	-0.343286
YBL076C	ILS1	-0.259542	-0.0429827	-0.217794	-1.2203	-1.65014	-1.17795	-2.47723	-1.97533	-1.9014	-1.64517	-0.77382
YLL028W	TPO1	-2.65656	-2.02095	-1.27291	-4.615	-4.52176	-4.3882	-0.916852	-0.541247	-0.413571	-0.998589	0.278636
YER148W	SPT15	-0.206138	-0.183438	-0.279928	-0.973799	-1.37534	-1.15533	-1.58776	-1.77057	-1.43558	-1.39561	-0.443096
YHR143W-A	RPC10	-0.163244	0.180032	0.0220475	-0.747475	-1.1017	-0.904978	-2.42873	-2.21449	-1.69951	-2.18611	-0.179067
YIL078W	THS1	-0.140095	0.0758615	-0.0424624	-1.25612	-1.54851	-1.06994	-2.3758	-1.78107	-1.83727	-1.49514	-0.000490075
YKL040C	NFU1	-0.319501	-0.177815	-0.227566	-1.14009	-1.29469	-0.986287	-1.41368	-1.32179	-1.11775	-1.41987	-0.130262
YKL180W	RPL17A	-0.39115	-0.0956527	-0.321757	-1.43805	-1.51937	-1.12294	-2.82397	-1.80101	-1.81353	-1.51797	-0.173179
YGL058W	RAD6	-0.226864	-0.104896	0.00409353	-1.59077	-1.31092	-0.88852	-2.19552	-2.05468	-1.76988	-1.91754	-0.228297
YJL111W	CCT7	-0.204786	-0.0217908	-0.0804092	-1.56083	-1.36036	-0.837212	-2.04192	-1.7941	-1.70239	-1.83116	-0.311221
YGR086C	PIL1	-1.24128	-0.728915	-0.849042	-3.29839	-2.69051	-2.26567	-0.825635	-0.274604	-0.520499	-0.712006	0.461213
YMR108W	ILV2	-0.235378	0.0756727	-0.171519	-0.226856	-0.907934	-0.807528	-2.02163	-1.40306	-1.46111	-1.62269	-0.0540865
YDL014W	NOP1	-0.303085	0.00469173	0.00449595	-0.899725	-1.50602	-1.13467	-3.18874	-2.1913	-2.13488	-2.29899	-0.883661
YHR027C	RPN1	-0.281667	-0.120687	-0.254298	-1.64834	-1.32792	-0.693859	-1.8514	-1.70743	-1.86242	-1.57287	-0.0193926
YOR312C	RPL20B	-0.302277	-0.119182	-0.269337	-1.34577	-1.69916	-1.19934	-2.6298	-1.74557	-1.72149	-1.40585	-0.244148
YOR261C	RPN8	-0.192391	-0.0733226	-0.101296	-1.47901	-1.52448	-1.00159	-1.84709	-1.60104	-1.69082	-1.90871	0.1178
YIL075C	RPN2	-0.353922	-0.198557	-0.388293	-1.71523	-1.50266	-0.912924	-1.74403	-1.81845	-1.78158	-1.59373	0.232655
YLR388W	RPS29A	-0.526724	-0.320171	-0.100449	-1.15254	-1.7534	-1.0457	-2.54827	-1.65529	-1.63704	-1.45873	-0.413588
YLR342W	FKS1	-0.483882	-0.199583	-0.481904	-1.53151	-1.58159	-1.11128	-1.31583	-1.0532	-0.950263	-1.01124	0.15134
YPL145C	KES1	-0.35342	-0.072977	-0.275319	-1.7231	-1.26365	-0.892272	-2.36339	-2.05171	-2.15271	-1.85025	-0.266537
YDR427W	RPN9	-0.194623	-0.171164	-0.187639	-1.50945	-1.19042	-0.786096	-1.60434	-1.58308	-1.6903	-1.56181	0.289076
YCL031C	RRP7	-0.0796515	0.110383	0.167231	-1.25211	-1.14769	-0.723089	-1.93657	-1.73402	-1.77065	-2.09668	-0.496191
YMR205C	PFK2	-0.681129	-0.357002	-0.471274	-1.96493	-1.62958	-1.12182	-1.02688	-0.438249	-0.444985	-0.85888	-0.4087
YOR276W	CAF20	-0.0551191	-0.120255	-0.0270546	-1.59262	-1.54037	-1.18831	-2.50555	-1.73273	-1.66685	-1.75804	-0.227158
YNR051C	BRE5	-0.14805	0.0174947	-0.07003	-1.78024	-1.41231	-0.867254	-2.45785	-2.06398	-2.16969	-1.95517	-0.223303
YDL185W	VMA1	-0.306699	-0.117284	-0.181179	-1.74419	-1.43466	-0.878835	-2.1031	-1.47455	-1.54191	-1.30907	0.252615
YIL142W	CCT2	-0.303468	-0.076853	-0.101879	-1.33933	-1.55214	-0.994034	-2.00393	-1.93398	-1.95079	-1.92251	-0.143418
YFR033C	QCR6	-0.248104	0.0336805	-0.353615	-1.65596	-2.01691	-1.17939	-1.23897	-0.576398	-0.765354	-1.14743	0.521423
YGL030W	RPL30	-0.469304	-0.0179731	-0.258057	-0.678636	-1.21951	-1.23266	-2.4734	-1.86764	-1.69009	-1.40559	0.0680704
YMR012W	CLU1	-0.26107	-0.0121847	-0.253043	-1.86874	-1.61811	-1.0662	-2.56003	-2.23864	-2.48443	-1.73641	-0.12946
YPR108W	RPN7	-0.202548	-0.0646611	-0.175044	-1.64371	-1.27586	-0.720339	-2.04711	-1.70069	-1.88468	-1.82542	0.269033
YBR067C	TIP1	-0.0302362	0.199667	0.229888	-1.51637	-0.787256	0.0228127	-2.37831	-0.67079	-0.806614	-1.13088	0.82424
YBR158W	AMN1	-1.46535	-0.752401	-0.80641	-2.89867	-3.32905	-2.87337	-0.463367	0.0578264	-0.0380169	-0.265592	-0.355914
YBL028C	YBL028C	-0.129718	-0.175202	0.0625023	-1.02241	-2.09264	-1.29296	-1.98767	-2.06902	-2.25131	-2.02261	-0.345346
YDL208W	NHP2	-0.172915	0.0248545	-0.135741	-1.32738	-1.49143	-1.0693	-2.6414	-2.18444	-2.15214	-2.02998	-0.824853
YKL156W	RPS27A	-0.320765	-0.0600213	-0.204111	-0.854982	-1.54017	-0.965554	-2.41464	-2.08436	-1.76328	-1.83569	-0.557182
YPL274W	SAM3	-1.20217	-0.802379	-0.74483	-1.68832	-1.9077	-1.65258	-0.600285	-0.626819	-0.128254	-1.05381	-0.839113
YNL180C	RHO5	-0.820835	-0.540321	-0.432661	-2.93655	-3.03096	-2.62899	-0.225917	0.0764031	0.0144438	-0.640906	0.556407
YOR122C	PFY1	-0.101466	0.0963106	-0.0820127	-1.10209	-0.7782	-0.400364	-2.30252	-1.73154	-1.40814	-1.61005	0.525038
YPL004C	LSP1	-1.04644	-0.900196	-1.21873	-3.59216	-2.09376	-1.57984	-0.873041	-0.245505	-0.410909	-0.859842	1.44071
YOR310C	NOP58	-0.238032	0.089622	-0.134777	-1.00832	-1.62039	-1.15367	-2.68271	-2.2435	-2.15113	-1.81072	-0.784792
YDL130W	RPP1B	-0.555282	-0.150442	-0.243546	-1.40864	-1.45531	-1.03548	-2.49194	-1.62269	-1.39876	-0.800355	-0.11925
YMR122W-A	YMR122W-A	-2.49202	-1.87105	-1.92724	-2.93406	-3.64033	-3.29746	-0.887671	-0.372714	-0.186496	-0.927199	0.786681
YOR303W	CPA1	-0.817242	-0.749271	-0.642838	-0.94293	-1.45066	-1.36515	-0.348109	-0.157239	0.000522867	-0.707229	0.486126
YOR270C	VPH1	-0.159124	-0.034665	-0.188513	-1.69824	-1.59795	-1.03974	-2.39927	-2.11967	-2.11706	-1.92965	0.0266036
YGL215W	CLG1	-0.0985341	0.000983912	0.0320126	-1.10055	-1.08422	-0.733367	-1.88772	-1.78371	-1.88873	-1.78695	0.24258
YGL105W	ARC1	-0.27208	0.0766339	-0.0751943	-1.67629	-1.56341	-1.05232	-2.04728	-1.59974	-1.76886	-1.58837	-0.197656
YLR421C	RPN13	0.0200589	0.0401898	0.072647	-1.4659	-1.02582	-0.594606	-2.22269	-1.6	-1.41654	-1.80651	0.168443
YDR233C	RTN1	-0.31251	0.0219484	-0.280987	-1.26609	-1.23633	-0.727732	-2.93517	-1.74245	-1.72651	-1.68146	-0.339698
YDR054C	CDC34	-0.4679	-0.302214	-0.149633	-1.51688	-1.45925	-1.11183	-2.37436	-2.23558	-1.97959	-2.27602	0.228513
YPR074C	TKL1	-0.442911	-0.0884491	-0.50085	-0.87225	-1.10834	-0.721568	-1.74422	-1.22513	-1.22596	-1.24142	-0.484866
YKL071W	YKL071W	-1.78062	-1.15959	-1.4509	-2.59984	-2.75084	-2.22462	-0.874739	-0.754494	-0.616518	-1.15985	-0.318513
YDR023W	SES1	-0.134973	0.0399608	-0.0341737	-1.44469	-1.47555	-0.984114	-2.49897	-1.75602	-1.81288	-1.62324	-0.492739
YER064C	VHR2	-0.768322	-0.733505	-0.609484	-2.02673	-1.49616	-0.809392	-0.644383	-0.0710237	-0.350417	-0.729741	0.194513
YKR076W	ECM4	-0.793262	-0.640983	-0.759942	-2.52451	-1.74421	-1.6567	-0.633362	-0.203546	-0.142327	-0.850766	1.98711
YML026C	RPS18B	-0.273907	-0.119207	-0.235204	-0.960097	-1.58279	-1.16874	-2.76081	-2.00442	-1.65599	-1.35361	-0.208874
YCR093W	CDC39	-0.214071	-0.0127127	-0.18423	-1.90108	-1.54352	-0.975894	-2.28286	-2.14509	-2.19816	-1.99864	-0.0744213
YHR007C	ERG11	-1.00143	-0.778714	-0.632695	-1.93443	-1.81932	-1.33278	-2.0089	-1.47056	-1.40011	-1.47364	0.0677351
YLR390W-A	CCW14	-0.573917	-0.201448	-0.381698	-1.42064	-1.41165	-1.00525	-1.41007	-1.36506	-1.30325	-1.22696	0.729608
YPL226W	NEW1	-0.299827	-0.0827538	-0.148721	-1.29545	-1.91785	-1.33225	-2.19142	-2.01197	-2.15018	-1.67176	-0.695947
YJR094W-A	RPL43B	-0.215251	0.0436897	-0.239871	-0.650372	-1.32164	-0.788239	-2.69117	-2.21448	-1.91046	-1.37532	-0.423087
YDL074C	BRE1	-0.0713785	0.081461	0.121904	-1.7218	-1.22707	-0.707254	-1.79654	-1.50049	-1.73034	-1.72095	-0.323542
YER026C	CHO1	-0.761133	-0.619093	-0.284891	-3.46482	-2.08598	-1.33014	-2.00704	-1.84912	-1.19724	-1.95763	0.0999317
YPL239W	YAR1	-0.247255	0.0863349	0.12153	-1.3414	-1.7928	-1.3874	-2.83112	-2.46447	-2.30786	-2.35369	-0.369944
YLR354C	TAL1	-0.592887	-0.451562	-0.619323	-1.41481	-1.41618	-0.998289	-1.84007	-1.28819	-1.2226	-1.2011	0.143948
YDL137W	ARF2	-0.333645	-0.408265	-0.249728	-1.79899	-1.25825	-0.886496	-2.37501	-1.63277	-1.55282	-1.75806	0.763637
YJR121W	ATP2	-0.27818	-0.00788478	-0.405287	-1.35728	-0.592048	-0.2749	-1.88336	-0.73436	-0.802287	-1.00348	1.03379
YDR487C	RIB3	-0.449983	-0.773898	-0.391476	-1.92666	-2.25489	-1.67687	-0.847227	-0.952753	-0.681007	-1.22696	0.156297
YDL082W	RPL13A	-0.331385	-0.0576958	-0.206019	-1.2323	-1.58729	-1.32344	-2.68625	-1.72334	-1.6703	-1.58655	-0.260382
YML126C	ERG13	-0.323947	-0.271363	-0.0307097	-1.13443	-0.636424	-0.101589	-2.29542	-1.46046	-1.62564	-1.40554	-0.0721875
YDR046C	BAP3	-0.950882	-0.714795	-0.593967	-2.18606	-2.56618	-2.33488	-0.392485	-0.321587	-0.142094	-0.786214	-0.0260078
YPL154C	PEP4	-0.55156	-0.472571	-0.573414	-2.38821	-1.04594	-0.749335	-0.87323	-0.717933	-0.750869	-0.830527	1.55983
YPR041W	TIF5	-0.214186	-0.0554143	-0.236578	-1.20434	-1.64224	-1.29088	-2.31426	-2.04835	-1.98633	-1.90542	-0.520292
YOR293W	RPS10A	-0.158144	-0.162495	-0.180418	-1.13375	-1.65722	-1.35386	-2.69513	-1.90764	-1.42511	-1.2559	-0.217849
YDR060W	MAK21	-0.124496	0.157835	0.204468	-1.12273	-1.47734	-0.980519	-2.39888	-2.02991	-2.15631	-1.83376	-0.973005
YGR162W	TIF4631	-0.33138	-0.0791497	-0.257333	-1.24078	-1.88237	-1.39336	-2.75233	-2.11536	-2.50534	-1.97524	-0.837917
YPL160W	CDC60	-0.0612594	0.0894759	-0.0584071	-0.946868	-1.20552	-0.846713	-2.14479	-1.63941	-1.76924	-1.53591	-0.358696
YMR142C	RPL13B	-0.284232	-0.0442292	-0.287581	-1.34781	-1.5848	-1.27639	-2.67085	-1.52222	-1.5337	-1.08068	-0.345434
YDR064W	RPS13	-0.265472	-0.0127786	-0.300712	-0.338112	-0.874148	-0.578776	-2.41442	-2.18241	-1.85969	-1.58376	-0.338495
YOR151C	RPB2	-0.183046	-0.00369048	-0.161645	-1.58486	-1.3785	-0.875679	-1.9492	-1.64052	-1.65962	-1.60866	-0.0357431
YPL093W	NOG1	-0.237586	0.151137	-0.00880932	-0.849778	-1.71547	-1.33445	-2.58865	-2.25693	-2.39816	-1.95972	-1.02159
YKL009W	MRT4	0.00894105	0.16402	0.017817	-0.528296	-1.34554	-1.1839	-2.93292	-2.34452	-2.0037	-2.08422	-1.03649
YMR177W	MMT1	-0.571653	-0.648082	-0.288192	-1.39045	-1.52877	-1.34965	-1.0778	-1.4803	-1.27035	-1.59164	-0.429633
YGR037C	ACB1	-0.258381	-0.2583	-0.238579	-0.73332	-0.789241	-0.0600415	-2.15489	-1.18408	-1.10431	-1.15237	0.101591
YCL037C	SRO9	-0.224622	0.218737	0.143673	-1.07789	-1.56873	-0.899781	-2.08116	-1.92003	-2.32146	-1.86693	-0.664715
YLR009W	RLP24	-0.213567	0.148361	0.224877	-0.791822	-1.60644	-1.09062	-2.42908	-2.21902	-2.45004	-1.90475	-0.806995
YGR285C	ZUO1	-0.294603	0.142898	0.0203526	-1.40644	-1.41602	-0.906299	-2.36115	-1.74096	-1.94041	-1.67704	-0.24078
YKL122C	SRP21	-0.0038713	0.17552	0.280181	-1.41535	-0.960019	-0.335646	-2.68843	-2.17068	-2.20705	-2.07994	-0.156617
YOR341W	RPA190	-0.251029	0.0850781	0.000506252	-1.01505	-1.68503	-1.19917	-2.87802	-1.94651	-1.97707	-1.85332	-0.846827
YOL058W	ARG1	-0.0375956	0.137321	0.332765	-0.745372	0.0300332	0.132161	-0.429705	0.294914	0.354116	-0.364488	-0.0538022
YFR032C-A	RPL29	-0.315224	-0.0390732	-0.606979	-0.85025	-1.17332	-0.66047	-2.62613	-1.9284	-1.50823	-0.853464	0.0998671
YCR031C	RPS14A	-0.441864	0.0283583	-0.171251	-1.27992	-1.51235	-0.816923	-2.33534	-1.50445	-1.51413	-0.973249	-0.0922545
YIL069C	RPS24B	-0.296892	-0.125026	-0.256829	-1.12573	-1.75223	-1.28298	-2.81892	-2.06738	-2.14093	-1.86786	-0.0541341
YNL016W	PUB1	-0.288417	-0.0975447	-0.173022	-1.62637	-1.52004	-1.0652	-2.5829	-1.84954	-2.16832	-1.6488	-0.297504
YDR172W	SUP35	-0.248824	0.156297	-0.0272855	-1.35247	-1.65767	-1.07566	-2.24139	-1.85417	-2.16825	-1.93195	-0.133939
YKL196C	YKT6	-0.153671	-0.01486	-0.0746316	-1.31448	-1.05533	-0.575558	-2.40269	-1.88814	-1.98118	-1.95296	-0.189798
YNL154C	YCK2	-0.264707	-0.111763	-0.231375	-1.81291	-1.44905	-1.01083	-2.12638	-1.98986	-1.99757	-1.9227	-0.318055
YMR242C	RPL20A	-0.211817	-0.184729	-0.262263	-1.35499	-1.54096	-1.11033	-2.36735	-1.60885	-1.58656	-1.44486	-0.214572
YJR088C	EMC2	-0.172354	-0.00769007	0.127478	-1.67953	-1.07854	-0.495488	-2.03817	-2.04382	-2.1085	-1.77385	0.139147
YKL001C	MET14	-0.285275	-0.257139	-0.728732	1.52079	-1.02583	-1.08211	-0.148341	-1.4735	-0.943358	-1.76805	0.198631
YGR253C	PUP2	-0.119204	-0.117277	-0.206164	-1.49636	-1.5839	-1.08087	-2.27256	-1.92488	-1.73129	-2.07293	0.209311
YOR254C	SEC63	-0.035356	0.100334	0.0469364	-1.6621	-1.2171	-0.757998	-2.54016	-2.03356	-2.12883	-1.81487	-0.289044
YBR106W	PHO88	-0.349214	-0.151625	-0.391163	-0.655089	-1.23969	-0.78154	-1.86032	-1.61993	-1.46279	-1.51865	-0.237666
YDL097C	RPN6	-0.339718	-0.186226	-0.285926	-1.92582	-1.6149	-1.04433	-2.11191	-1.77929	-1.79342	-1.94167	0.36646
YLR040C	AFB1	-0.714958	-0.312629	-0.524979	-1.51625	-4.13479	-3.25878	-3.96788	-1.26413	-1.19652	-1.58447	-0.40602
YBR283C	SSH1	-0.19978	0.0335094	-0.229702	-1.7151	-1.49106	-1.00278	-2.28667	-2.02371	-1.89381	-1.86327	-0.180963
YGR218W	CRM1	-0.113067	0.0279513	-0.0309167	-1.73391	-1.0484	-0.555281	-1.79357	-1.9004	-1.93744	-1.45241	0.0911463
YNL260C	LTO1	-0.252774	-0.518899	-0.240898	-1.30034	-1.71676	-1.58497	-1.58243	-1.2283	-0.889983	-1.67099	-0.203734
YMR072W	ABF2	-0.212443	-0.17329	-0.239516	-1.58916	-1.41311	-0.929895	-2.59907	-2.11625	-2.04054	-1.93119	0.403242
YKL013C	ARC19	-0.1616	0.0454828	-0.0847044	-1.84424	-1.32691	-0.744131	-2.00621	-1.88469	-1.59684	-1.93499	0.530536
YGL206C	CHC1	-0.295252	-0.0482705	-0.279714	-2.25332	-1.28708	-0.649206	-1.79994	-1.5598	-1.58032	-1.40796	0.545972
YOR232W	MGE1	-0.0057765	0.13726	0.0240467	-1.40453	-1.32481	-0.78161	-1.9604	-1.60946	-1.55235	-1.67423	-0.286503
YBL027W	RPL19B	-0.360488	-0.0593056	-0.223282	-1.09746	-1.65527	-1.12568	-2.69538	-1.76	-1.58614	-1.27041	-0.189517
YPL243W	SRP68	0.0131004	0.148918	0.08849	-1.36096	-1.14665	-0.654633	-2.10738	-1.7936	-1.89837	-1.76913	-0.0491216
YER055C	HIS1	-0.0282711	0.353059	0.0797847	-0.793187	-1.04157	-0.915929	-1.66153	-0.915496	-0.903719	-1.35062	-0.615851
YKR094C	RPL40B	-0.0559735	-0.159701	-0.0984168	-1.21894	-1.51768	-1.03903	-2.36313	-1.87797	-1.84399	-1.3311	-0.114592
YER072W	VTC1	-0.246655	-0.10067	-0.27446	-2.33604	-2.67569	-2.26448	-1.7316	-1.7235	-1.22145	-1.1904	-0.158335
YMR039C	SUB1	-0.239882	-0.13343	-0.165553	-1.19599	-0.975361	-0.545104	-3.58794	-3.23547	-3.32602	-3.3083	0.115496
YNR016C	ACC1	-0.638658	-0.366864	-0.517338	-2.91014	-2.15858	-1.49457	-1.65991	-0.753972	-0.686078	-0.839631	-0.0587153
YDL070W	BDF2	-1.26305	-1.0271	-1.11039	-3.17064	-2.40609	-1.74021	0.447007	0.509399	0.16342	0.0801944	0.172737
YOR206W	NOC2	-0.0762797	0.109612	0.175437	-1.17908	-1.57671	-0.936984	-2.63802	-2.13716	-2.23886	-1.99511	-1.01452
YBR127C	VMA2	-0.322278	-0.0122494	-0.0467511	-1.70107	-1.3985	-0.781304	-2.15727	-1.62495	-1.5265	-1.33423	-0.182343
YFR004W	RPN11	-0.0867806	0.0664504	-0.11433	-1.62468	-1.09811	-0.795271	-2.27231	-1.90812	-2.00361	-2.06696	0.178904
YGL037C	PNC1	-1.58474	-1.1202	-1.34615	-4.78158	-3.61824	-3.42944	-0.925315	-0.433233	-0.162511	-1.46232	2.67052
YLR347C	KAP95	-0.582279	-0.237778	-0.454784	-1.90214	-1.87639	-1.51997	-2.36404	-2.144	-2.41003	-2.08256	-0.595302
YFL045C	SEC53	-0.280755	-0.141833	-0.168892	-1.46657	-1.64985	-1.09632	-1.78858	-1.60722	-1.27134	-1.28292	-0.159481
YPR110C	RPC40	-0.0251716	0.167355	-0.0272371	-1.00995	-1.43903	-0.917402	-2.52043	-1.99062	-2.08445	-1.799	-0.648395
YDL160C	DHH1	-0.218222	0.00178077	-0.152459	-1.90189	-1.30314	-0.794246	-1.67479	-1.40886	-1.57998	-1.35301	-0.078876
YIL133C	RPL16A	-0.240571	-0.168752	-0.297401	-1.04374	-1.68239	-1.17813	-2.89836	-1.9809	-1.76913	-1.67582	-0.532931
YML073C	RPL6A	-0.394638	-0.14276	-0.247321	-1.47269	-1.71364	-1.41537	-2.63094	-1.62425	-1.53168	-1.3184	-0.563159
YER122C	GLO3	-0.184403	0.0812122	0.0635869	-1.61126	-1.33932	-0.878629	-2.09465	-1.71313	-1.85794	-2.00384	-0.067022
YDR496C	PUF6	0.00866577	0.270453	0.192505	-0.778943	-1.44056	-0.967613	-2.72127	-2.29873	-2.28763	-2.16353	-0.921808
YNL087W	TCB2	-0.918483	-0.958786	-0.518853	-2.0495	-2.4018	-2.0075	-0.451526	-0.807933	-0.563	-0.798131	-0.843469
YLR060W	FRS1	-0.157895	0.0806121	-0.0947838	-1.57673	-1.49304	-1.05207	-2.18363	-1.64438	-1.82955	-1.715	-0.426234
YKL039W	PTM1	-0.315789	-0.300585	-0.23287	-1.72255	-1.54624	-1.01766	-1.39359	-1.3944	-1.30011	-1.38616	0.499607
YHR052W	CIC1	0.0561272	0.150632	0.143311	-0.957119	-1.60414	-1.09921	-2.64274	-2.2415	-2.29135	-2.08186	-0.78244
YCR053W	THR4	-0.114133	0.268873	2.07e-05	-1.14856	-1.19813	-1.03349	-2.39658	-1.96285	-1.83079	-1.7265	-0.198461
YMR002W	MIX17	-0.27943	-0.113616	-0.23071	-1.27602	-0.972581	-0.579865	-0.592383	-0.865288	-0.424009	-1.37405	0.879506
YER070W	RNR1	-1.70975	-1.15546	-1.33514	-2.6772	-2.99113	-2.33419	-0.774121	-0.448898	-0.367049	-0.729802	-0.0020457
YGL207W	SPT16	-0.202346	-0.00194868	-0.0241801	-1.59378	-1.28164	-0.76897	-1.89144	-1.79779	-1.94465	-1.73121	0.259222
YER073W	ALD5	-0.634471	-0.710796	-0.598678	-0.836655	-1.19716	-1.2801	-1.01297	-0.357376	-0.444065	-0.57731	-0.487225
YOR335C	ALA1	-0.254193	-0.084762	-0.159979	-1.28566	-1.6021	-1.09958	-2.78159	-2.15453	-2.27684	-1.84466	-0.648493
YFL031W	HAC1	-0.373699	-0.0612194	-0.179841	-1.10729	-1.17757	-0.634666	-1.78066	-0.817285	-0.98717	-1.22524	0.431066
YCR009C	RVS161	-0.249045	-0.190779	-0.276359	-1.89239	-1.57762	-1.20184	-2.29818	-1.74568	-1.85631	-1.81196	0.44772
YLL050C	COF1	-0.261087	-0.167808	-0.187075	-1.59669	-1.23801	-0.775808	-2.57519	-1.92975	-1.59065	-1.47148	0.3299
YBL056W	PTC3	-0.323554	-0.00243254	-0.145912	-1.95804	-1.09701	-0.615253	-2.11288	-1.73507	-1.91812	-1.75131	0.156019
YNL190W	YNL190W	-0.698365	-0.342728	-0.679905	-1.57281	-2.0128	-1.33507	-1.3501	-0.759815	-0.580628	-1.00693	0.380442
YNL229C	URE2	-0.127711	0.0130927	-0.0535076	-1.03321	-1.4838	-0.918058	-2.62773	-2.38224	-2.40008	-2.11393	0.10032
YPR187W	RPO26	-0.165456	0.0899735	0.0331541	-1.32633	-1.16748	-0.64865	-2.6667	-1.9956	-1.50595	-1.80259	-0.542434
YLR448W	RPL6B	-0.245533	-0.146155	-0.314057	-1.37846	-1.84171	-1.29323	-2.69582	-1.93022	-1.99877	-1.61606	-0.339532
YIL051C	MMF1	-0.42531	-0.695016	-0.756842	-2.08934	-1.80181	-1.51453	-0.794986	-0.357337	-0.333569	-0.336592	-0.0786552
YJR105W	ADO1	-0.383584	0.274296	0.00836346	-1.25486	-1.57662	-1.09467	-2.18152	-1.74649	-1.75712	-1.56939	-0.434374
YER133W	GLC7	-0.241022	-0.244187	-0.47976	-1.80202	-1.43261	-1.09682	-2.34517	-1.98631	-1.82049	-1.94494	0.153381
YGL103W	RPL28	-0.123062	0.0199625	-0.0936833	-0.407151	-0.747415	-0.276745	-1.63727	-1.64534	-1.42581	-1.22897	0.000356932
YNL308C	KRI1	-0.0208302	0.303984	0.426519	-0.893195	-1.21771	-0.675513	-2.477	-1.90441	-2.04639	-1.92812	-0.761608
YLR061W	RPL22A	-0.233998	-0.0696541	-0.310699	-0.965028	-1.50834	-1.07648	-2.59142	-2.13131	-1.84358	-1.46357	-0.0646782
YNL153C	GIM3	-0.110278	0.0984372	0.152959	-1.3507	-1.20638	-0.890512	-2.88437	-2.46818	-2.15446	-2.4699	-0.431654
YMR308C	PSE1	-0.124756	0.220916	-0.0150764	-1.42859	-1.45225	-1.03014	-2.4302	-2.12941	-2.21835	-1.94229	-0.421883
YPL210C	SRP72	0.0155498	0.155243	0.106375	-1.62987	-1.18767	-0.837229	-2.02883	-1.97444	-1.88734	-1.69967	-0.302062
YDR429C	TIF35	-0.229437	0.136679	0.0452512	-1.36493	-1.3968	-0.770604	-2.35689	-1.79801	-2.03386	-2.05131	-0.325003
YDR447C	RPS17B	-0.375872	-0.18921	-0.17538	-0.997502	-1.67822	-1.22062	-2.82852	-2.01842	-1.93359	-1.16015	0.0441512
YOR361C	PRT1	-0.212592	0.121491	-0.0216425	-1.25129	-1.42466	-1.05612	-2.27628	-2.00551	-2.08559	-1.8718	-0.480583
YNL110C	NOP15	0.100378	0.294222	0.319592	-0.964661	-1.49747	-0.790002	-2.84685	-2.24397	-2.6261	-2.2102	-0.876132
YDR341C	YDR341C	-0.190382	0.0647183	0.0211854	-0.86383	-1.61928	-1.37244	-2.13027	-1.66557	-1.59416	-1.47761	-0.402569
YGR279C	SCW4	-0.732328	-0.429536	-0.45905	-1.58622	-1.81216	-1.40491	-1.64326	-0.739717	-0.753069	-0.73849	0.625297
YKL117W	SBA1	-0.262461	-0.0834268	-0.350323	-1.76847	-1.32804	-0.942787	-1.98238	-1.761	-1.42153	-1.33031	0.219583
YHR064C	SSZ1	-0.188787	0.113533	-0.0226193	-1.27882	-1.35578	-0.909197	-2.14209	-1.62906	-1.83713	-1.46236	-0.148104
YOR355W	GDS1	0.34197	0.529032	0.540961	-0.683241	-0.118471	0.246577	-3.00878	-2.9219	-2.58393	-2.36055	0.0474525
YBR121C	GRS1	-0.193794	0.203077	-0.0304396	-1.39439	-1.27804	-0.858052	-2.52216	-1.81693	-1.77832	-1.71523	-0.381836
YNL189W	SRP1	-0.093947	0.0674326	-0.0126754	-1.46013	-1.35188	-0.929065	-1.86476	-1.84127	-1.9869	-1.68255	-0.0645688
YDR368W	YPR1	-0.562972	-0.47086	-0.6685	-1.95316	-2.0395	-1.73722	-2.49551	-2.21634	-2.18666	-1.88351	0.615699
YNL241C	ZWF1	-1.23591	-1.20309	-1.3277	-2.16196	-2.40574	-1.98429	-0.143682	-0.0867134	-0.107549	-0.768614	0.45654
YOL121C	RPS19A	-0.280347	-0.0792877	-0.167302	-1.05786	-1.44794	-1.15432	-2.61036	-1.73348	-1.59167	-1.25034	-0.591262
YKL103C	APE1	-1.24276	-0.966957	-1.20554	-2.76594	-1.64467	-1.53412	-0.946273	-0.543067	-0.443644	-0.999795	1.89625
YLR287C-A	RPS30A	-0.248819	-0.213082	-0.457656	-1.14214	-1.66435	-1.52576	-2.13052	-1.51516	-1.24322	-0.989723	-0.413219
YNL096C	RPS7B	-0.332946	-0.174601	-0.263192	-1.41446	-1.64608	-1.31009	-2.73285	-2.17881	-2.2198	-2.01645	-0.428847
YHL034C	SBP1	-0.316287	0.0773289	-0.0510871	-1.86482	-1.47587	-0.955087	-2.4037	-1.52588	-1.37836	-1.50094	0.322683
YLR455W	PDP3	-0.32389	-0.160884	-0.214268	-1.75636	-0.98055	-0.635638	-2.1935	-2.33949	-2.2656	-2.48156	-0.0426284
YNL070W	TOM7	-0.0383681	0.285628	0.160728	-1.37073	-0.684998	-0.403009	-2.05028	-1.75655	-1.04039	-1.94358	-0.0646517
YIL148W	RPL40A	-0.288974	-0.0990738	-0.290311	-1.24755	-1.67341	-1.40537	-2.5872	-1.65982	-1.60023	-1.24233	-0.392982
YER009W	NTF2	-0.251748	-0.0586266	-0.0422251	-1.32005	-1.20252	-0.894194	-1.8783	-1.56124	-1.50694	-1.23935	0.00101228
YJR122W	IBA57	-0.39391	-0.309776	-0.413073	-1.38111	-1.51721	-1.23926	-1.73725	-1.97349	-1.79161	-1.9312	0.0845754
YHR183W	GND1	-0.427072	-0.337739	-0.607328	-1.92991	-1.73375	-1.28749	-2.21979	-1.3806	-1.23957	-1.39257	-0.454843
YNL104C	LEU4	-0.227614	-0.125191	-0.512745	-0.286826	-0.696568	-0.556056	-0.617826	-0.10151	-0.103009	-0.296912	0.426878
YGR094W	VAS1	-0.219883	0.10393	-0.0588851	-1.18807	-1.33449	-0.882151	-2.69184	-1.97295	-2.02252	-1.67154	-0.536326
YDR158W	HOM2	-0.296824	0.0124819	-0.215861	-0.240152	-1.26234	-1.21935	-1.65892	-0.835219	-0.730166	-0.935441	-0.240164
YPL260W	YPL260W	-0.198208	0.018986	0.0787821	-2.01742	-1.20161	-0.720017	-1.80783	-1.55015	-1.71161	-1.71903	0.461676
YAL025C	MAK16	0.0156932	0.287948	0.382592	-0.832026	-1.50541	-0.996418	-2.61095	-2.01173	-2.46047	-2.14541	-0.813561
YDR238C	SEC26	-0.218536	0.0765236	-0.0619574	-1.85743	-1.20148	-0.62094	-2.0576	-1.87991	-1.88642	-1.70037	0.044902
YPR024W	YME1	-0.352669	-0.241268	-0.262733	-1.73317	-1.48281	-0.959684	-2.32509	-2.00331	-2.21345	-1.99225	0.071192
YPR181C	SEC23	-0.519074	-0.00586424	-0.366922	-1.65283	-1.58966	-1.07608	-2.39101	-2.1758	-2.06509	-1.8546	-0.114769
YNL118C	DCP2	-0.18909	-0.0725175	-0.124728	-1.79397	-1.41578	-0.882956	-1.80506	-1.57749	-1.7853	-1.6773	-0.0390952
YKR008W	RSC4	-0.13969	-0.075916	0.186046	-2.04393	-1.39435	-0.820786	-1.70589	-1.70797	-1.91041	-1.90654	-0.269964
YER090W	TRP2	-0.213046	-0.062776	-0.01612	-1.11931	-1.28125	-0.941491	-1.55453	-1.39344	-1.21436	-1.61007	-0.216802
YOR117W	RPT5	-0.312208	0.0183101	-0.216748	-1.42728	-1.36741	-0.871204	-2.1839	-1.60394	-1.71293	-1.8053	0.197448
YGR034W	RPL26B	-0.273559	-0.0920125	-0.297044	-1.03245	-1.58956	-1.04178	-2.76188	-1.91524	-1.66451	-1.11233	-0.328485
YNL212W	VID27	-0.44298	-0.505653	-0.450152	-1.89578	-1.50742	-1.16502	-2.17196	-2.00223	-2.03556	-1.7148	-0.0677534
YMR229C	RRP5	0.00182421	0.265072	0.194023	-1.1968	-1.37696	-0.879748	-2.26615	-1.73827	-1.8357	-1.67063	-0.92523
YAL016W	TPD3	-0.232302	0.00404233	-0.105957	-1.86072	-1.14633	-0.731975	-1.84858	-1.8545	-1.79075	-1.72164	0.324116
YMR161W	HLJ1	-0.0670561	0.142511	0.0618675	-1.60637	-0.86855	-0.420544	-2.37278	-2.09821	-2.11807	-2.16465	-0.226136
YFR052W	RPN12	-0.264489	-0.209898	-0.35337	-1.74396	-1.47113	-1.07999	-1.90238	-1.67282	-1.66081	-2.00188	0.295635
YNL066W	SUN4	-1.19239	-0.765849	-0.896566	-2.41642	-3.28466	-2.6758	-0.945495	-0.378054	-0.392773	-0.720481	-1.04128
YFL016C	MDJ1	-0.514952	0.164498	0.0481455	-2.27882	-1.92779	-1.6035	-2.92495	-2.97971	-2.69059	-2.53243	1.14554
YNL113W	RPC19	-0.135441	0.178976	0.119478	-0.684325	-1.51571	-0.802657	-2.59947	-2.11285	-2.04001	-2.11865	-0.525579
YOR168W	GLN4	-0.114744	0.192367	0.0220608	-1.13435	-1.11078	-0.597729	-2.17015	-2.10174	-2.20975	-1.64499	-0.683467
YPL204W	HRR25	-0.292262	0.0275049	-0.0334136	-1.49238	-1.33689	-0.881888	-2.03427	-1.94472	-2.14267	-1.94002	0.125775
YGL190C	CDC55	-0.0613312	0.17758	0.105676	-1.82119	-1.04868	-0.688035	-2.0196	-2.00242	-2.05874	-2.09501	-0.0954738
YOR370C	MRS6	-0.316005	0.090355	-0.102873	-1.29459	-1.40159	-1.10891	-1.7251	-1.54902	-1.5416	-1.49987	-0.265786
YDR151C	CTH1	-0.1102	0.418362	0.199277	-1.72496	-1.28407	-0.948844	-2.09403	-2.28615	-2.07927	-1.93465	0.150328
YKR057W	RPS21A	-0.0373273	0.0344554	-0.0629005	-0.898033	-1.31601	-0.837605	-2.74687	-1.77267	-1.68457	-1.37438	-0.357163
YER087C-B	SBH1	-0.198234	-0.089086	-0.162956	-1.91883	-1.44358	-1.07243	-2.56107	-1.67109	-1.69186	-1.72985	-0.078888
YDR035W	ARO3	-0.0553174	0.0627504	-0.091674	-0.661574	-1.03607	-0.858529	-2.41135	-1.51434	-1.53345	-1.32889	0.00694783
YOR267C	HRK1	-0.689515	-0.17056	-0.188489	-2.06492	-1.86024	-1.41751	-2.0762	-1.7186	-1.75557	-2.06531	0.0880634
YLR413W	INA1	-1.69296	-1.43488	-1.41725	-2.79036	-2.8839	-2.40784	-1.97199	-0.372117	-0.390511	-0.680998	-1.23498
YBL072C	RPS8A	-0.171606	-0.0936471	-0.480018	-1.3752	-1.57178	-1.27622	-2.55622	-1.67839	-1.64073	-1.29427	0.122239
YEL065W	SIT1	-1.69801	-1.16455	-0.887446	-1.3435	-2.54669	-2.32631	-1.23871	-1.13517	-0.7008	-1.19017	0.0218367
YBR154C	RPB5	-0.0993498	0.170456	-0.0370192	-1.08469	-1.70909	-1.23583	-2.75017	-2.04787	-1.97781	-1.95149	-0.498452
YGR116W	SPT6	-0.187304	0.203774	0.104058	-1.88551	-0.96786	-0.430179	-2.14651	-1.6477	-1.81036	-1.59687	-0.244985
YOL136C	PFK27	-0.382891	-0.612418	-0.716554	-1.63847	-2.10884	-1.87953	-1.23717	-0.909431	-1.01069	-0.950404	-0.0362374
YPL078C	ATP4	-0.16697	-0.011865	-0.197885	-1.70061	-0.897287	-0.511193	-1.95861	-1.37855	-1.2943	-1.47141	0.824193
YJL109C	UTP10	-0.195993	-0.0169686	-0.112116	-0.95976	-1.55066	-1.07581	-2.31859	-2.20956	-2.26002	-1.93866	-0.902473
YMR235C	RNA1	-0.143807	0.163144	0.0991367	-1.49599	-1.25835	-0.817348	-2.48817	-1.6861	-1.56704	-1.81741	-0.252879
YDR091C	RLI1	-0.111023	0.138438	0.0149863	-1.16427	-1.518	-1.06078	-1.921	-1.88227	-1.83644	-1.61377	-0.737248
YBL099W	ATP1	-0.214165	0.0485594	-0.2734	-1.6282	-0.722517	-0.463664	-1.82862	-1.13087	-1.08593	-1.22922	0.34444
YPR036W	VMA13	-0.386078	-0.111438	-0.2234	-1.70852	-1.62376	-1.23462	-2.92426	-2.1586	-2.17894	-2.11683	0.151277
YOL154W	ZPS1	-2.70994	-1.44511	0.171292	-3.58741	-2.18461	-1.28194	-1.93538	2.63666	1.9965	2.33506	0.0418775
YLR051C	FCF2	-0.0336912	0.231939	0.492217	-0.819816	-1.11598	-0.690381	-1.9449	-2.01696	-1.97381	-1.8893	-0.536499
YNL002C	RLP7	0.0353171	0.0748583	0.189964	-0.798745	-1.35746	-0.878168	-2.7323	-2.76934	-2.24855	-2.21274	-0.689492
YKR095W	MLP1	-0.115085	0.124906	0.0969188	-1.78577	-0.911362	-0.395837	-1.76094	-1.55177	-1.80075	-1.57968	-0.208718
YBR034C	HMT1	-0.191598	0.0760385	0.0135844	-0.876951	-1.84195	-1.35412	-2.28744	-2.0836	-1.8771	-1.66896	-0.665933
YDL140C	RPO21	-0.19042	-0.008904	-0.245497	-1.65627	-1.60163	-0.991739	-1.88538	-1.62769	-1.66657	-1.61687	-0.0588818
YDR394W	RPT3	-0.23674	-0.0911279	-0.216426	-1.60875	-1.69466	-1.18688	-2.07865	-1.90799	-1.89366	-2.00107	0.237526
YPL117C	IDI1	-0.320651	-0.311453	-0.415539	-1.10421	-1.94883	-1.73506	-2.73935	-2.17602	-1.79352	-1.90107	-0.270853
YGR135W	PRE9	-0.164242	-0.0360978	-0.339108	-1.45744	-1.35873	-0.802892	-2.10045	-1.60611	-1.54954	-1.81962	0.255548
YNL085W	MKT1	-0.172815	0.0886899	-0.0109825	-1.64779	-1.1382	-0.616621	-1.96037	-1.66345	-1.80101	-1.50898	-0.0828103
YLR064W	PER33	-0.292869	-0.280872	-0.321286	-1.7128	-1.81539	-1.37756	-1.49136	-1.56556	-1.33897	-1.3074	0.00563552
YML012W	ERV25	-0.144692	0.13287	0.0499045	-1.74174	-1.2991	-0.807476	-2.40287	-1.77841	-1.58383	-1.74054	0.381951
YBL041W	PRE7	-0.201606	-0.0769308	-0.377743	-1.25592	-1.74761	-1.29557	-2.05397	-2.01412	-1.5607	-2.08305	0.296385
YKL210W	UBA1	-0.0477986	-0.0173985	-0.131702	-1.86866	-1.59128	-0.975693	-2.13864	-1.6059	-1.57718	-1.30735	0.339274
YGL011C	SCL1	-0.166992	-0.0738567	-0.195245	-1.56698	-1.40855	-0.887946	-2.16207	-2.14833	-2.29834	-1.98002	0.354404
YDR471W	RPL27B	-0.22528	-0.144084	-0.293135	-1.04151	-1.55516	-1.1907	-3.12227	-2.15235	-1.87145	-1.73644	-0.0927533
YGR124W	ASN2	-0.25893	0.0972983	-0.305138	-0.776593	-1.49195	-1.17779	-3.02289	-2.01626	-1.96543	-1.84205	-0.110669
YOR332W	VMA4	-0.15681	-0.0358286	0.146172	-1.69393	-1.23202	-0.851964	-2.26698	-1.36696	-1.67905	-1.135	0.122211
YER002W	NOP16	-0.0676103	0.247761	0.2927	-0.852794	-1.20174	-0.704577	-2.12132	-2.0202	-1.87838	-1.90963	-0.65224
YJL189W	RPL39	-0.123651	-0.0608557	0.0764743	-0.694529	-1.15044	-0.563742	-2.32448	-1.80083	-1.73865	-1.12707	-0.102721
YKL178C	STE3	-1.04688	-0.647276	-1.23554	-1.69333	-4.53009	-4.05794	-2.75029	-0.811211	-0.932286	-0.998987	-0.654417
YFL004W	VTC2	-0.103376	0.000877439	-0.0924057	-3.19089	-2.77443	-2.26441	-2.0183	-1.96909	-1.87855	-1.83365	-0.454607
YDL145C	COP1	-0.179722	0.0714487	-0.140177	-1.74381	-1.19527	-0.745929	-1.88505	-1.53983	-1.61454	-1.53363	0.0151477
YGL195W	GCN1	-0.0541734	0.245252	0.0309004	-1.54208	-1.13684	-0.621207	-2.08702	-1.50932	-1.50279	-1.45522	-0.340039
YJL052W	TDH1	-3.61234	-3.00878	-3.88422	-5.81657	-4.8836	-4.44528	0.406255	1.23385	1.17545	0.342643	0.469285
YMR143W	RPS16A	-0.250327	-0.128414	-0.218919	-1.16876	-1.75773	-1.38241	-2.25369	-1.8451	-1.39771	-1.2229	-0.230008
YML007W	YAP1	-0.335021	-0.10305	-0.329609	-1.19572	-1.4413	-1.13196	-0.578158	-0.796843	-0.679827	-1.14121	0.502758
YDR077W	SED1	-1.03078	-0.705002	-0.748634	-2.10433	-2.65972	-1.72239	-0.937353	-0.180531	-0.182303	-0.862619	2.32009
YMR079W	SEC14	-0.130807	0.0284291	-0.243932	-1.55958	-1.40884	-0.908375	-2.39349	-2.15024	-1.97263	-1.79676	-0.0784652
YDR270W	CCC2	-0.830222	-0.768673	-0.516853	-1.61698	-2.33697	-2.11047	-0.527463	-0.858385	-0.643385	-1.15125	0.197792
YJR063W	RPA12	-0.494287	0.102058	-0.0819759	-0.857334	-1.37589	-0.818759	-3.07016	-2.1592	-2.25999	-2.80081	-0.525727
YDR214W	AHA1	-0.349967	0.108222	-0.199995	-2.37405	-2.03765	-1.60159	-1.39933	-1.30834	-1.44759	-1.28814	0.585253
YPR103W	PRE2	-0.354104	-0.126734	-0.240749	-1.58386	-1.52799	-0.91781	-2.01855	-1.921	-1.71911	-1.73749	0.0882885
YDR365C	ESF1	-0.160245	0.209308	0.194978	-0.759306	-1.04531	-0.503826	-1.78268	-0.724376	-1.16059	-1.30555	-0.611825
YCL043C	PDI1	-0.531055	-0.377485	-0.705996	-2.08059	-1.89832	-1.35168	-1.73222	-1.49668	-1.47097	-1.37554	0.404672
YOL120C	RPL18A	-0.312065	0.00355564	-0.343078	-0.998231	-1.51713	-1.15975	-2.4682	-1.84474	-1.53867	-1.24562	-0.402312
YGL173C	XRN1	-0.120601	0.0563305	-0.113832	-1.98255	-1.4951	-0.843373	-1.73351	-1.65706	-1.74154	-1.45552	-0.0711236
YGL122C	NAB2	-0.396306	-0.257782	-0.366302	-1.78938	-1.42255	-1.02179	-2.11157	-2.12142	-2.29584	-2.14652	-0.345729
YDL235C	YPD1	-0.0585277	0.0481377	-0.0939129	-1.58992	-0.943709	-0.870701	-2.40636	-1.95891	-2.24816	-1.85109	-0.0345713
YDL075W	RPL31A	-0.342651	-0.0416693	-0.120044	-1.27784	-1.6837	-1.1961	-2.4617	-1.49494	-1.59662	-1.12859	0.167629
YLR276C	DBP9	0.0635506	0.246396	0.397805	-0.807146	-1.23502	-0.87275	-2.51724	-2.19583	-2.21583	-2.07978	-0.798317
YER012W	PRE1	-0.190495	-0.172115	-0.333021	-1.68241	-1.42529	-0.987368	-2.19346	-1.91682	-1.82013	-2.12319	0.424326
YPL212C	PUS1	-0.140237	0.0580059	0.128722	-0.882519	-1.22114	-0.819888	-2.44614	-2.16414	-2.27009	-2.13889	-0.345729
YKL184W	SPE1	-0.332812	-0.194473	-0.189092	-1.0986	-1.56216	-1.12691	-2.59294	-2.21667	-2.10515	-1.80327	0.0832497
YMR230W	RPS10B	-0.0185947	-0.0821965	-0.134005	-1.14454	-1.40168	-1.0035	-2.5922	-1.93545	-1.75387	-1.36706	-0.160276
YDL029W	ARP2	-0.239118	-0.114079	-0.339672	-2.17343	-1.72493	-1.28976	-1.59651	-1.59552	-1.35873	-1.42466	0.519684
YLR447C	VMA6	-0.0262421	0.0761762	-0.0545002	-1.60843	-1.06939	-0.905368	-1.98233	-1.60646	-1.74901	-1.53391	-0.0605216
YJR117W	STE24	-0.432448	0.0517015	-0.119019	-1.82799	-1.58225	-1.01714	-2.03796	-1.81436	-1.94633	-1.7959	-0.0513662
YPL249C-A	RPL36B	-0.312751	-0.0602958	-0.251829	-1.15396	-1.68462	-1.16833	-2.47317	-1.28086	-1.60315	-0.91561	-0.283027
YKL057C	NUP120	-0.201937	-0.0709727	-0.0169017	-1.77336	-1.34088	-0.824758	-1.81673	-1.97005	-1.86882	-1.83231	-0.238102
YLR257W	YLR257W	-0.263105	-0.146099	-0.945624	-1.78814	-0.878642	-0.507414	-1.89992	-0.90028	-1.00667	-1.48465	0.948219
YOR039W	CKB2	-0.200532	-0.0160453	-0.163213	-1.68113	-1.41374	-1.0795	-2.6448	-2.3153	-1.76887	-2.06809	-0.0154501
YDR346C	SVF1	-0.172629	-0.102116	-0.0997067	-1.14252	-1.35245	-0.911165	-2.05245	-2.07014	-2.05199	-1.60225	-0.297467
YPL043W	NOP4	-0.051212	0.290034	0.367585	-0.937415	-1.52206	-0.844137	-2.54947	-2.18357	-2.40151	-2.04709	-0.937944
YOR360C	PDE2	0.127738	0.0949575	0.0281474	-0.820059	-0.903867	-0.709655	-1.66673	-1.76256	-1.67389	-1.34819	0.0317987
YGL029W	CGR1	-0.00792984	0.114044	0.356863	-1.07167	-1.38425	-0.606619	-2.60279	-2.77201	-1.89783	-2.99323	-1.0719
YFR040W	SAP155	-0.166905	-0.0150422	-0.0499546	-1.81527	-1.23753	-0.705336	-1.8776	-1.52116	-1.8359	-1.76342	-0.00408867
YNL248C	RPA49	0.00562292	0.178048	0.105738	-0.832933	-1.5061	-1.09374	-2.51385	-2.16616	-2.25416	-2.01335	-0.88467
YDL007W	RPT2	-0.17989	0.00382566	-0.153145	-1.6407	-1.47108	-1.04473	-2.1184	-1.86907	-1.90066	-1.92406	0.465377
YML024W	RPS17A	-0.167874	-0.139051	-0.218047	-1.33597	-1.79883	-1.35454	-2.68136	-1.78542	-1.6075	-0.941187	-0.00671533
YOL027C	MDM38	-0.0486262	0.225492	0.279214	-1.22598	-0.864985	-0.305759	-2.14827	-1.98034	-2.20014	-2.06169	-0.0318691
YBL024W	NCL1	-0.111117	0.172643	0.110969	-1.4736	-1.22936	-0.723385	-2.3297	-1.96065	-1.9536	-1.75453	-0.393957
YER103W	SSA4	0.20007	0.548844	0.322227	-2.78699	-1.80391	-1.48883	-1.58374	-1.81385	-1.89746	-2.24118	2.62948
YIL126W	STH1	-0.116747	0.216742	0.164594	-2.06226	-1.11422	-0.390855	-2.90961	-2.36091	-2.64674	-2.36915	-0.468137
YPL050C	MNN9	0.0544332	0.215814	-0.0362738	-1.56927	-1.2955	-0.729567	-2.08661	-1.80469	-1.61206	-1.79348	-0.359359
YOR259C	RPT4	-0.285359	-0.0717967	-0.199143	-1.57652	-1.63091	-1.08039	-2.23245	-1.67678	-1.97651	-1.84399	0.347738
YDR174W	HMO1	-0.0283202	0.233468	0.287814	-1.17915	-1.12849	-0.609	-2.11634	-2.01437	-1.98066	-1.65411	-0.1255
YMR188C	MRPS17	0.116992	0.0850493	0.0869475	-1.56249	-1.11053	-0.648571	-1.92662	-1.82605	-1.73078	-2.1061	0.155004
YOL145C	CTR9	-0.162564	0.0656827	0.0611742	-1.75407	-1.28033	-0.714167	-2.40288	-1.69349	-2.05059	-1.77045	-0.0994506
YDR299W	BFR2	0.214638	0.277288	0.500103	-0.920416	-1.26123	-0.61123	-2.18587	-1.78396	-2.02826	-1.70493	-0.760718
YGR020C	VMA7	-0.523591	-0.141965	-0.291898	-1.6293	-1.25682	-0.952248	-2.65544	-1.83277	-1.89624	-1.67823	-0.115122
YPR072W	NOT5	-0.155894	0.074848	0.176422	-1.73476	-1.0077	-0.4774	-1.78652	-1.70212	-2.01351	-1.75839	-0.119347
YDR212W	TCP1	-0.236074	0.157126	-0.105373	-1.69231	-1.349	-0.824586	-2.3789	-1.89174	-1.99773	-2.03021	-0.115551
YKL054C	DEF1	-0.0684408	0.195496	0.272135	-1.41078	-1.63604	-1.06872	-0.965726	-1.05773	-1.52271	-1.07155	-0.103281
YLR292C	SEC72	-0.020469	0.0891799	0.0785391	-1.28847	-1.21773	-0.741924	-2.00471	-1.70228	-1.56885	-1.35273	-0.0843302
YPL179W	PPQ1	-0.13367	-0.00524156	0.0795943	-1.56034	-1.39856	-0.939517	-1.74975	-1.7614	-1.77975	-1.68002	0.227089
YMR217W	GUA1	-0.352577	0.0315642	-0.0529895	-0.472769	-1.75051	-1.38082	-2.36069	-1.68481	-1.76291	-1.46983	-0.571264
YIL035C	CKA1	0.0158167	0.0846616	0.184985	-1.49106	-1.09244	-0.508124	-1.9267	-1.88535	-1.50448	-1.71645	-0.0960949
YDR381W	YRA1	-0.526999	-0.571531	-0.769523	-1.75331	-1.13834	-0.658305	-0.621347	-0.29746	-0.0892726	-0.689996	0.165346
YHR128W	FUR1	-0.58365	-0.383252	-0.769685	-1.38109	-1.83896	-1.51667	-2.09373	-1.49073	-1.15689	-1.51779	-0.95075
YMR146C	TIF34	-0.351436	0.0860129	-0.0961923	-1.59823	-1.51496	-1.01477	-2.89395	-2.35384	-2.27161	-2.1017	-0.419234
YPL190C	NAB3	-0.1768	0.121339	0.0655089	-1.83458	-1.27702	-0.579065	-1.61223	-1.46959	-1.64061	-1.53636	-0.133676
YJL014W	CCT3	-0.129295	0.145297	-0.0655307	-1.4164	-1.15428	-0.784549	-2.03541	-1.98243	-1.99318	-1.88704	-0.336453
YKR052C	MRS4	-0.377561	0.324786	0.108951	-0.691318	-1.13666	-0.906991	-0.963504	-0.584986	-0.386577	-1.01452	-0.211442
YML103C	NUP188	-0.0742288	0.0373929	0.0302123	-1.73656	-1.26664	-0.75567	-1.9881	-1.84179	-1.94099	-1.76372	0.0789598
YPR143W	RRP15	-0.0149191	0.0424576	0.383525	-1.22022	-1.42328	-0.669043	-2.63689	-2.02779	-2.10268	-2.24517	-0.581597
YMR246W	FAA4	-1.31071	-1.17046	-1.00975	-2.05443	-2.08058	-1.71535	-1.74375	-0.402142	-0.323216	-0.588714	-0.676045
YNL197C	WHI3	-0.234523	-0.073191	-0.0411458	-2.00095	-1.31821	-0.768147	-1.76523	-1.81962	-1.99743	-1.83399	-0.289776
YKL035W	UGP1	-0.377928	-0.134926	-0.658812	-2.50298	-0.973938	-0.473461	-1.23858	-0.552736	-0.756104	-1.2911	1.91205
YPL202C	AFT2	-0.243529	-0.278133	-0.205049	-1.31429	-1.74542	-1.63799	-0.952066	-1.52828	-1.47789	-1.57918	-0.0917934
YOR089C	VPS21	-0.138237	0.0527582	0.109359	-1.41837	-1.39201	-1.03539	-2.12735	-1.87574	-1.65012	-1.72788	0.230415
YOL077C	BRX1	0.0199549	0.258468	0.181656	-1.06911	-1.23725	-0.885403	-2.47296	-2.10254	-2.21072	-1.89553	-0.76758
YBR286W	APE3	-0.312716	0.0296794	-0.305001	-1.93263	-0.945559	-0.361891	-1.77878	-0.966383	-1.04386	-1.04677	0.59531
YJL130C	URA2	-0.605912	-0.251767	-0.469014	-1.34944	-1.40603	-1.10331	-1.46112	-1.03555	-1.0445	-1.00782	-0.325747
YGR103W	NOP7	-0.066732	0.176509	0.238809	-0.954082	-1.65268	-1.02107	-2.54637	-2.1451	-2.12617	-1.57715	-1.04758
YER126C	NSA2	0.144521	0.258188	0.32597	-0.423297	-1.50037	-1.03832	-2.47554	-1.77312	-2.30806	-2.14768	-0.610222
YDR450W	RPS18A	-0.134584	-0.016272	-0.416118	-1.00169	-1.90772	-1.24851	-2.78175	-1.95909	-1.45954	-1.17282	-0.197586
YMR183C	SSO2	-0.295501	-0.100397	-0.0157212	-1.75298	-1.43156	-0.855712	-2.17926	-1.65414	-1.89768	-1.539	-0.308603
YKR014C	YPT52	0.042323	0.383432	0.132214	-1.35989	-0.758667	-0.248091	-1.94899	-1.81114	-2.15028	-1.79376	0.402975
YHR196W	UTP9	0.248388	0.236347	0.364947	-0.871728	-1.09296	-0.785768	-1.60984	-1.77581	-1.81963	-1.84933	-0.753149
YGR229C	SMI1	-0.299601	-0.0379421	-0.264599	-1.28975	-1.61752	-1.22067	-3.08171	-2.65105	-2.79875	-2.50953	-0.0396399
YOL049W	GSH2	-0.121817	-0.00350041	-0.173107	-1.55757	-1.06562	-0.768635	-2.34005	-1.86006	-1.91809	-1.77117	0.108457
YML074C	FPR3	-0.339968	0.0875032	0.170306	-1.62227	-1.824	-0.766622	-2.56353	-1.47601	-1.58707	-1.67457	-0.323803
YIL118W	RHO3	-0.146599	0.0797764	-0.188513	-1.50907	-1.32424	-1.03912	-2.57411	-2.23504	-2.18602	-2.14922	-0.0861557
YMR131C	RRB1	-0.182301	0.167847	0.0266446	-0.620166	-1.53966	-1.1728	-2.65487	-2.33617	-2.24397	-1.9633	-0.672553
YNL061W	NOP2	-0.0521578	0.182154	0.195408	-0.907188	-1.45288	-0.788411	-2.57269	-1.90987	-2.29336	-1.88033	-0.91497
YBR177C	EHT1	-0.960979	-0.230842	-0.777646	-3.23611	-2.45296	-2.09422	-1.6956	-1.50737	-0.943467	-1.52286	-0.242042
YJL002C	OST1	-0.239938	0.0165699	-0.066496	-1.68848	-1.21372	-0.720611	-1.81415	-1.80625	-1.70335	-1.69794	0.0531108
YDR377W	ATP17	-0.084175	0.224135	-0.0363134	-1.18432	-0.942138	-0.755376	-2.18652	-1.73216	-1.23041	-1.53476	0.708635
YFL037W	TUB2	-0.422239	-0.0553136	-0.258899	-2.03671	-1.51943	-1.01302	-2.44516	-1.72911	-1.52961	-1.85788	-0.0567018
YPL171C	OYE3	-2.19754	-1.48187	-2.08266	-2.45722	-1.67879	-1.54648	-1.22911	-0.376344	-0.228886	-1.00735	0.883426
YGL238W	CSE1	-0.0720592	0.0654824	-0.0439081	-1.64135	-1.22854	-0.806082	-1.82297	-1.9157	-1.86305	-1.6497	-0.252069
YPL178W	CBC2	-0.157826	0.137336	-0.032842	-1.71836	-1.46055	-0.677282	-2.26375	-2.17421	-2.05045	-2.26398	-0.199404
YDL148C	NOP14	-0.0505568	0.306067	0.390196	-0.961276	-1.28792	-0.713445	-2.38399	-2.07995	-2.1701	-1.84244	-0.846634
YIL038C	NOT3	-0.107172	0.146522	0.0757293	-1.67263	-1.08514	-0.663764	-1.77377	-1.72704	-2.04052	-1.77296	-0.167233
YJL008C	CCT8	-0.231154	0.0509361	-0.217858	-1.44431	-1.42495	-0.930614	-2.05959	-1.83659	-1.87063	-1.80227	-0.362641
YOR043W	WHI2	-0.327576	-0.113448	-0.331567	-1.48712	-1.60757	-1.23481	-1.52664	-1.94685	-1.44107	-1.96127	0.0289039
YHR094C	HXT1	-2.61812	-1.87739	-1.61694	-1.80967	-3.68237	-3.49141	-0.68158	0.41107	0.694688	-0.205201	-0.645536
YGR185C	TYS1	-0.140473	0.090901	-0.119498	-1.33846	-1.36125	-0.925406	-2.15611	-1.59379	-1.61114	-1.78774	-0.346146
YDR190C	RVB1	-0.186662	0.176941	0.116381	-1.50965	-1.31356	-0.732312	-2.24885	-1.83019	-1.9068	-1.96867	-0.173745
YML022W	APT1	-0.0851617	0.319954	-0.0447565	-0.164808	-0.887718	-0.64792	-2.18616	-2.11831	-1.72376	-1.76242	-0.757004
YJL177W	RPL17B	-0.112457	-0.14682	-0.227751	-1.03392	-1.40055	-1.1176	-2.79869	-1.71707	-1.69867	-1.53174	-0.129876
YHR141C	RPL42B	-0.360996	-0.194767	-0.44214	-1.16255	-1.74164	-1.25452	-2.48135	-1.82328	-1.4468	-1.28609	0.158179
YBL022C	PIM1	-0.318429	-0.113017	-0.287401	-1.7817	-1.51274	-0.877094	-1.87424	-1.76523	-2.06892	-1.77196	0.308006
YDR508C	GNP1	-1.14309	-0.818619	-0.845958	-1.57725	-2.27661	-1.90191	-0.924893	-0.470911	-0.413145	-0.800394	-0.0716658
YGR017W	YGR017W	-0.139848	0.063582	-0.0773717	-1.38872	-1.17748	-0.967631	-3.03433	-2.3235	-2.12328	-2.39865	-0.194883
YFR010W	UBP6	-0.178697	0.0818998	-0.164515	-1.7826	-1.18087	-0.672285	-1.92393	-1.76297	-1.7454	-1.87041	0.505606
YDR264C	AKR1	-0.362763	-0.258325	-0.130177	-0.965452	-1.14134	-0.858304	-2.17172	-2.09243	-1.94493	-1.62276	0.052471
YFL038C	YPT1	-0.272797	0.0201202	-0.132251	-1.6449	-1.56975	-0.99133	-2.60619	-1.97114	-1.50629	-1.81747	0.375165
YGL077C	HNM1	-0.547198	-0.126548	-0.00923888	-3.02739	-1.87553	-1.40424	-1.62207	-1.44959	-1.19339	-1.39881	-0.782534
YHL011C	PRS3	0.00342881	0.207009	-0.000699483	-0.85835	-1.29287	-1.12261	-2.53902	-1.97844	-2.09812	-1.98057	-0.506084
YPL273W	SAM4	-0.125492	0.0794778	-0.0207677	-0.907803	-1.30811	-0.907736	-2.00366	-1.67273	-1.47071	-1.75362	-0.673371
YKL063C	YKL063C	-0.153829	0.0950717	0.113232	-1.65891	-1.22061	-0.734045	-2.10266	-2.54402	-2.4478	-2.45641	0.108802
YBR130C	SHE3	-0.214958	-0.0922133	0.0542377	-1.8521	-1.33137	-0.872855	-1.95636	-1.55967	-1.89768	-1.71366	-0.173191
YGR132C	PHB1	-0.192001	0.104154	-0.087763	-1.40866	-0.894669	-0.556561	-1.8809	-1.83514	-1.66504	-1.54971	0.697236
YHR170W	NMD3	-0.0916944	0.121302	0.187181	-0.79102	-1.61152	-1.16153	-2.62041	-2.43228	-2.49756	-1.97577	-0.905121
YBR049C	REB1	-0.127706	0.15432	0.20309	-2.14356	-1.5288	-0.952604	-2.09515	-1.86816	-2.03807	-1.65775	-0.240828
YDR395W	SXM1	-0.106306	0.0856276	-0.0706514	-1.26131	-1.29601	-0.916263	-2.3212	-2.14664	-2.05391	-1.8589	-0.250301
YGR090W	UTP22	-0.0813257	0.14958	0.0713345	-1.50804	-1.35959	-0.848616	-2.20376	-2.20013	-2.25683	-2.00873	-0.411127
YOR078W	BUD21	-0.0586024	0.096549	0.134393	-0.958139	-1.24581	-1.04876	-2.72292	-2.10512	-2.41717	-2.46564	-0.4586
YER136W	GDI1	-0.283681	-0.0598081	-0.120115	-1.61533	-1.04449	-0.504491	-2.36191	-1.91549	-2.14479	-1.83617	0.290841
YDL180W	YDL180W	-0.658841	-0.398068	-0.524662	-1.08606	-1.94774	-1.69943	-1.44884	-1.27445	-1.09468	-1.43501	0.235071
YPR169W	JIP5	0.0230451	0.0603866	0.0485547	-1.11297	-1.14656	-0.766822	-2.0611	-2.00172	-2.10797	-1.77227	-0.47893
YLR033W	RSC58	-0.0055522	0.140713	0.222814	-1.64085	-1.03288	-0.501946	-2.18844	-1.86932	-1.97011	-1.81368	-0.258535
YPR043W	RPL43A	-0.338427	-0.106993	-0.320416	-1.21921	-1.71352	-1.08546	-2.09739	-1.73738	-1.45837	-1.20699	-0.34493
YOL041C	NOP12	0.00783762	0.345549	0.393367	-1.05027	-1.30629	-0.829536	-1.90808	-1.74436	-1.89181	-1.85623	-0.754386
YIL018W	RPL2B	-0.330615	-0.0534331	-0.452956	-1.18278	-1.67218	-1.38526	-2.73775	-1.87841	-1.55659	-1.14207	0.115103
YMR194W	RPL36A	-0.107383	-0.170562	-0.151772	-1.18167	-1.25002	-0.852879	-2.30833	-1.79639	-1.63714	-1.35792	-0.457624
YKR028W	SAP190	-0.162648	-0.0215666	0.00240317	-1.91198	-1.34727	-0.768696	-1.96307	-1.85798	-2.05242	-1.74567	-0.111462
YDR032C	PST2	-0.567741	-1.03186	-0.704184	-2.17618	-1.44543	-1.30286	-0.586234	-0.649157	-0.381398	-1.30994	1.49153
YPL118W	MRP51	0.0111729	0.182366	0.141614	-1.74167	-1.12711	-0.711959	-2.27995	-1.79898	-1.59343	-2.11385	0.324866
YDL083C	RPS16B	-0.217022	-0.218802	-0.296898	-1.37442	-1.8156	-1.32597	-2.87379	-1.9076	-1.68046	-1.55864	-0.41741
YBR146W	MRPS9	-0.097514	0.118646	0.0577982	-1.60959	-1.14664	-0.633813	-1.94878	-1.92927	-2.09081	-1.88702	0.196547
YKL028W	TFA1	-0.163552	-0.0246892	0.155232	-1.76855	-1.14704	-0.66491	-1.86518	-1.58133	-1.96956	-1.68194	-0.0154477
YDR028C	REG1	-0.087931	0.114141	0.0865286	-1.87714	-1.06661	-0.520685	-2.09932	-1.80231	-2.16896	-1.81008	0.211881
YKL006W	RPL14A	-0.260205	-0.112069	-0.237782	-1.06178	-1.57831	-1.26839	-2.47783	-1.73746	-1.55362	-1.11444	-0.431501
YKL179C	COY1	0.0197941	0.189776	0.165434	-1.772	-0.887031	-0.389397	-2.06418	-1.68484	-2.01925	-1.74431	-0.020994
YGR054W	YGR054W	-0.240675	0.0952445	-0.054941	-1.50261	-1.49333	-1.02634	-2.35755	-2.35601	-2.19169	-2.16901	-0.163734
YJL080C	SCP160	-0.231615	0.0933394	-0.128917	-1.74606	-1.47773	-0.953413	-2.54632	-1.97636	-2.02591	-1.72039	-0.546289
YOR290C	SNF2	-0.27962	0.00700655	0.0142296	-2.08794	-1.21198	-0.525188	-1.86761	-1.69333	-1.92686	-1.80548	0.0131477
YER056C	FCY2	-0.741812	-0.573726	-1.00564	-0.458816	-1.92933	-1.8248	-0.88055	-0.597107	-0.307282	-0.771949	-0.381469
YPL079W	RPL21B	-0.223457	-0.194038	-0.329301	-1.41751	-1.67549	-1.28464	-2.33531	-1.86876	-1.74857	-1.47058	-0.147353
YPL265W	DIP5	-1.1824	-0.863563	-1.1349	-1.3229	-2.92059	-2.8052	-0.00647749	0.761191	0.898346	0.0685189	0.00623777
YDL025C	RTK1	-0.542485	-0.322918	-0.325116	-1.65379	-1.45089	-1.2747	-1.37485	-0.837852	-0.742259	-1.45145	0.826576
YGL009C	LEU1	0.694944	0.830941	0.0298179	0.741298	1.27949	1.4277	-0.650702	-0.744707	-1.02018	-0.815426	-0.561048
YHR135C	YCK1	-0.330989	-0.0199078	-0.090441	-1.79713	-1.36047	-0.733231	-2.3892	-1.97954	-2.32974	-2.1273	0.0863139
YER074W	RPS24A	-0.428954	-0.080927	-0.0362285	-1.14137	-1.48366	-1.08374	-2.72972	-1.71159	-1.67773	-1.06468	-0.0684044
YKR081C	RPF2	0.00615576	0.241544	0.227935	-0.739759	-1.50834	-1.13697	-2.76886	-2.44191	-2.36153	-2.15403	-0.845204
YGR106C	VOA1	-0.197094	-0.055506	-0.0778924	-1.31353	-1.37629	-0.697046	-2.31131	-1.93082	-1.33396	-1.57757	-0.118405
YGL245W	GUS1	-0.127473	0.175527	-0.047815	-1.70607	-1.26974	-0.817435	-2.10244	-1.42054	-1.53007	-1.27769	-0.154805
YGR161C	RTS3	-0.876578	-0.895181	-0.274936	-2.11354	-0.986183	-1.113	-0.612831	-0.0875179	-0.471967	-0.922935	2.20764
YDL125C	HNT1	-0.600423	-0.508046	-0.317784	-1.89769	-2.03705	-1.53121	-1.01944	-0.745965	-0.451098	-1.4271	0.209084
YDL122W	UBP1	-0.0979357	0.0903483	-0.101345	-1.52172	-1.53987	-1.05376	-2.16644	-1.67583	-1.92863	-1.74904	-0.211857
YJL136C	RPS21B	-0.0900493	-0.187213	-0.224729	-1.15977	-1.44004	-0.988395	-2.70235	-1.60238	-1.55941	-0.935778	-0.763002
YKR011C	YKR011C	-0.378442	-0.427607	-0.286583	-2.39798	-1.06086	-0.296342	-1.48232	-1.57384	-1.65685	-1.69896	0.288351
YDL053C	PBP4	0.0900447	0.349908	0.172038	-1.43215	-0.980003	-0.581449	-2.25204	-1.63394	-1.73276	-1.88804	0.604901
YCL054W	SPB1	-0.0319297	0.187716	0.444761	-1.06464	-1.27811	-0.71377	-2.34761	-2.08977	-2.26245	-1.91836	-0.756904
YCL011C	GBP2	-0.126969	0.0823625	0.0269079	-1.62193	-1.1589	-0.675295	-2.24569	-1.8755	-1.81319	-1.9261	-0.240207
YDR127W	ARO1	-0.105416	0.303468	0.150324	-1.01006	-1.25992	-0.982226	-1.58076	-0.898341	-0.845354	-0.964777	0.211992
YIL149C	MLP2	-0.0852225	0.108063	0.151811	-1.91978	-1.10776	-0.475265	-2.07381	-1.72492	-1.94898	-1.83179	-0.314318
YFR002W	NIC96	-0.120963	0.208694	0.132422	-1.56368	-0.918092	-0.563407	-1.72898	-1.84537	-1.84016	-1.69048	-0.0460274
YPL012W	RRP12	-0.011216	0.268226	0.177195	-0.85041	-1.43957	-1.04933	-2.51715	-2.53901	-2.44805	-1.94393	-1.05978
YGR146C	ECL1	-0.517582	-0.426029	-0.6807	-0.608696	-1.13732	-1.07712	-0.200153	-0.078097	-0.298271	-0.598625	0.366801
YPL215W	CBP3	-0.0481972	0.0892593	-0.0138758	-1.72312	-1.08956	-0.695247	-1.71298	-1.68182	-1.79452	-1.57233	0.389856
YML009C	MRPL39	-0.257827	0.0592723	-0.0704233	-1.7595	-0.821825	-0.718194	-3.00362	-1.58806	-2.01336	-2.32242	0.297044
YGR128C	UTP8	0.0376361	0.236568	0.180665	-1.07156	-1.50831	-1.14381	-2.43978	-2.31316	-2.22694	-1.92249	-0.780036
YOL068C	HST1	-0.0436547	0.0466271	-0.0149743	-1.68634	-1.19743	-0.665475	-1.85161	-1.75263	-1.79256	-1.9285	0.00510984
YPR016C	TIF6	-0.29968	0.0590032	-0.153632	-0.936372	-1.41135	-0.925536	-2.58546	-2.51266	-2.12364	-2.14835	-0.499148
YGR231C	PHB2	-0.34976	-0.0413701	-0.195315	-1.77928	-1.45898	-0.932855	-2.17144	-1.69904	-1.85333	-1.97695	0.464218
YER123W	YCK3	0.186548	0.308255	0.337641	-1.35222	-0.887983	-0.3361	-1.30177	-1.46621	-1.67093	-1.40669	-0.0230396
YDR226W	ADK1	-0.579902	-0.5983	-0.758596	-2.17985	-2.50682	-1.77513	-1.86778	-1.10318	-1.20453	-1.16025	-0.292574
YPR010C	RPA135	-0.130687	0.169192	-0.0194083	-0.796997	-1.52292	-1.16292	-2.84219	-2.51393	-2.51592	-2.08503	-0.937871
YGR130C	YGR130C	-0.248848	-0.118643	-0.195975	-2.8589	-1.25383	-0.682217	-1.93645	-1.45939	-2.08343	-1.99029	1.19365
YEL051W	VMA8	-0.0928499	0.0428528	-0.0320316	-1.70525	-1.42439	-0.625955	-2.48242	-1.80138	-1.77479	-1.51094	0.142398
YCR004C	YCP4	-0.2681	-0.284298	-0.276985	-1.0921	-0.371148	-0.179374	-1.52469	-1.14027	-0.752186	-1.46067	0.754181
YMR295C	YMR295C	-0.338474	-0.169979	-0.323497	-1.89112	-1.71076	-0.986999	-2.45101	-2.13435	-2.59299	-2.02192	0.349098
YNL044W	YIP3	-0.31548	-0.367003	-0.0947915	-2.44839	-1.97405	-1.13921	-2.27963	-2.07123	-1.8232	-2.10136	-0.302682
YML093W	UTP14	-0.0525963	0.265056	0.26428	-1.21581	-1.54853	-0.8171	-2.41621	-2.22171	-2.32101	-1.9333	-0.786921
YDR152W	GIR2	0.0224671	0.0189847	0.146718	-1.03567	-1.37771	-0.879432	-2.16536	-1.77751	-2.00436	-1.80712	-0.4082
YDR153C	ENT5	-0.14777	0.121362	0.281448	-1.39189	-1.2545	-0.750661	-2.54041	-2.17598	-2.24772	-2.39874	-0.0524483
YLR297W	YLR297W	-1.74657	-2.84537	-2.52943	-3.49578	-4.62105	-4.50771	-0.627245	-0.397776	-0.0852887	-0.658823	0.879155
YPL146C	NOP53	0.111125	0.167498	0.272834	-1.22269	-1.34805	-0.741452	-2.52167	-2.35833	-2.24439	-2.31098	-0.852365
YNL005C	MRP7	0.0625527	0.27717	0.132116	-1.22883	-1.06629	-0.617898	-2.29045	-2.03408	-1.65558	-2.03114	0.255167
YPL105C	SYH1	-0.259647	0.103996	0.118143	-1.67203	-1.24045	-0.693581	-1.81701	-1.7485	-1.88842	-1.89085	-0.291311
YNR021W	YNR021W	-0.147476	0.0544549	0.10571	-1.68871	-1.10765	-0.679642	-2.03209	-1.84637	-1.83861	-1.81347	-0.22375
YPL019C	VTC3	-0.115626	-0.0933436	-0.12142	-4.95372	-4.10387	-3.39686	-1.32969	-1.26767	-1.3301	-1.18127	-0.288962
YJR014W	TMA22	-0.259256	-0.160784	-0.198616	-1.41877	-1.65005	-1.10584	-2.7855	-2.09912	-2.37062	-2.02809	-0.272266
YHR005C	GPA1	-0.444372	-0.146397	-0.0431578	-1.04464	-1.94779	-1.44706	-2.35703	-1.30177	-1.50936	-1.57818	-0.33236
YBR162W-A	YSY6	-0.263474	0.0124224	-0.300772	-1.61043	-1.54066	-1.00195	-2.77051	-1.62299	-1.14407	-1.2403	-0.166542
YML056C	IMD4	-0.333821	-0.463489	-0.699219	-0.845694	-1.53806	-0.912247	-2.31577	-1.05795	-1.18148	-1.13911	-0.922908
YKL145W	RPT1	-0.317573	-0.202574	-0.200235	-1.73619	-1.49587	-0.995202	-2.22234	-1.84166	-2.01056	-1.82505	0.410416
YHR203C	RPS4B	-0.301442	-0.0790045	-0.183026	-1.16808	-1.41767	-1.12303	-2.63781	-2.02475	-1.87396	-1.36378	0.00556876
YGL244W	RTF1	-0.105452	0.248388	0.196565	-1.67906	-0.809574	-0.169136	-2.20231	-1.62032	-1.86151	-1.98075	-0.0834977
YDL116W	NUP84	-0.0459785	0.143331	0.134844	-1.73538	-1.16435	-0.674622	-1.80191	-1.76391	-1.78036	-1.62617	-0.203422
YDL143W	CCT4	-0.254761	0.18124	-0.165798	-1.55867	-1.43607	-0.963037	-2.02713	-1.81555	-1.96758	-1.74125	-0.259844
YMR203W	TOM40	-0.331556	0.0674401	-0.128805	-1.87992	-1.34944	-0.740555	-2.21182	-1.86394	-1.89619	-1.77278	-0.224557
YLR310C	CDC25	-0.207944	-0.0561915	-0.0863092	-1.55306	-1.16318	-0.698372	-2.19472	-1.81785	-1.93843	-1.76457	0.14861
YOR008C	SLG1	-0.515402	-0.426271	-0.558611	-2.12331	-1.97717	-1.6682	-2.83632	-2.36711	-2.37208	-2.12552	-0.114893
YKL120W	OAC1	-0.201517	-0.241121	-0.304221	0.0449595	-0.768391	-0.596421	-0.952452	-0.635139	-0.829729	-1.19168	-0.977768
YDR335W	MSN5	-0.158737	-0.104293	-0.161663	-1.5284	-1.06488	-0.721341	-2.15342	-2.16497	-2.06067	-1.91442	0.371131
YHR077C	NMD2	-0.0345253	0.0823618	0.157941	-1.46168	-0.993217	-0.551948	-1.73005	-1.746	-1.93927	-1.59013	-0.175316
YGR267C	FOL2	0.0719754	0.00487467	-0.0583196	-0.700547	-1.04365	-0.707286	-2.13183	-1.84414	-1.92518	-1.75739	0.0867016
YEL033W	MTC7	-0.809734	-0.502904	-0.139192	-1.89066	-1.38545	-0.644942	-0.989225	-0.879846	0.128012	-1.61877	-0.190067
YPR067W	ISA2	-0.300981	-0.0408568	-0.334436	-1.41214	-1.0882	-0.748363	-2.3939	-2.36107	-2.20463	-2.41925	0.16834
YBR086C	IST2	-0.426814	-0.288391	-0.460258	-2.44489	-1.56362	-0.972068	-2.26375	-2.46689	-2.29862	-2.01396	0.00764832
YGR175C	ERG1	-0.638645	-0.606262	-0.673079	-1.93723	-1.52258	-1.01863	-1.9972	-1.26481	-1.20276	-1.41472	0.266232
YGL043W	DST1	-0.144875	0.129077	0.059499	-1.54517	-1.26211	-0.996471	-2.14968	-1.83705	-2.15687	-1.66115	-0.149731
YGL078C	DBP3	-0.0976098	0.187544	-0.0830916	-0.837937	-1.60909	-1.11124	-3.09755	-2.65794	-2.48018	-2.14698	-0.94399
YJL168C	SET2	-0.197178	-0.0122361	0.106133	-2.35419	-1.37516	-0.874034	-2.35725	-1.92976	-2.0025	-2.05238	-0.590942
YMR037C	MSN2	-0.41159	-0.259998	-0.241334	-1.7704	-1.49109	-1.07439	-1.73765	-0.617798	-0.743891	-0.824085	0.331531
YLR221C	RSA3	0.0762022	0.151694	0.235291	-1.24399	-1.19932	-0.799576	-2.68171	-2.10502	-2.41287	-2.26873	-0.694622
YML038C	YMD8	-0.27003	-0.224808	0.0108948	-1.20101	-1.14189	-0.593934	-1.90403	-2.09391	-1.89889	-1.8721	0.205449
YOR224C	RPB8	0.0944608	0.318566	0.076881	-0.901288	-0.907133	-0.588064	-2.71073	-2.0058	-1.63171	-1.88546	-0.776461
YNL091W	NST1	-0.169879	0.128275	0.235851	-1.84782	-0.98335	-0.295219	-1.85121	-1.92497	-2.11084	-1.77816	0.0137715
YGR167W	CLC1	-0.20184	0.0928804	0.0342098	-1.97355	-1.21937	-0.571029	-2.19467	-1.40478	-1.77682	-1.98186	0.426879
YFR050C	PRE4	-0.109737	-0.0164363	-0.345271	-1.53362	-1.52847	-1.10368	-1.92897	-1.81703	-1.57894	-1.94149	0.358145
YKL104C	GFA1	-0.293573	-0.00179252	-0.209806	-1.24835	-1.25603	-0.838371	-2.26421	-1.73306	-1.74052	-1.69451	0.588042
YDR062W	LCB2	-0.293494	-0.0317525	-0.153336	-1.69625	-1.31339	-0.90601	-2.74758	-2.2883	-2.26176	-2.2888	-0.172059
YOR247W	SRL1	-1.0395	-0.569298	-0.644088	-1.79369	-1.71364	-0.664667	-0.133999	0.0541844	-0.0752369	-0.25675	0.149188
YML081C-A	ATP18	-0.216618	0.162343	-0.152174	-1.60361	-0.976179	-0.632895	-2.32121	-2.00456	-1.38784	-1.16913	0.748306
YCR033W	SNT1	-0.274832	-0.0294925	-0.000837567	-2.05951	-1.33933	-0.855969	-2.06151	-1.64939	-2.11444	-1.67478	-0.207089
YJL012C	VTC4	-0.068391	0.110848	0.00313377	-3.46873	-2.65353	-2.19644	-1.6946	-1.394	-1.53638	-1.34831	-0.285861
YKL080W	VMA5	-0.212538	0.11064	-0.0586772	-1.76349	-1.07811	-0.77202	-2.04525	-1.78947	-1.77209	-1.71092	-0.116654
YOR326W	MYO2	-0.225911	0.000578731	-0.114254	-1.85702	-1.36569	-0.70143	-2.2429	-2.02339	-2.15297	-1.78401	0.0481858
YCR082W	AHC2	0.183804	0.209596	-0.0747403	-1.18801	-0.945993	-0.633486	-1.78735	-2.13645	-1.35857	-1.9617	0.0434404
YLR432W	IMD3	-0.60645	-0.319346	-0.670663	-1.44017	-1.9007	-1.27915	-2.28951	-1.09102	-1.03185	-1.02743	-0.480734
YMR173W	DDR48	-2.80237	-1.99622	-1.91379	-3.87633	-4.83107	-4.12401	-0.304942	-0.0911134	-0.31839	-0.83058	1.19571
YBR029C	CDS1	-0.494881	-0.374949	-0.132201	-3.0106	-2.13143	-1.51211	-2.63826	-2.39151	-2.29142	-2.50469	-0.771235
YPL090C	RPS6A	-0.230607	-0.253495	-0.275998	-1.27528	-1.68987	-1.26019	-2.42519	-1.97467	-1.64397	-1.40453	-0.506053
YBR199W	KTR4	-0.157845	-0.0409204	-0.148615	-1.91418	-0.847494	-0.386283	-1.91366	-1.46308	-1.32409	-1.51846	0.544588
YER006W	NUG1	0.0195065	0.274594	0.0606701	-0.72763	-1.50588	-0.973346	-2.64197	-2.24708	-2.24242	-1.96757	-0.864717
YDL067C	COX9	0.0612946	0.312598	-0.0784293	-0.113614	-0.583721	-0.312832	-2.30876	-1.19546	-0.60294	-1.49251	0.655981
YDR280W	RRP45	0.0565428	0.0978555	0.251258	-1.26449	-1.36283	-0.926593	-2.27563	-2.06777	-1.94452	-2.05909	-0.520346
YHR190W	ERG9	-0.236968	-0.231625	-0.234392	-1.95752	-0.792881	-0.571685	-1.26605	-1.10678	-1.10072	-1.31277	0.441497
YBL030C	PET9	-0.210431	0.0566153	-0.445696	-1.05127	-0.793709	-0.479086	-1.1425	-0.280325	-0.0651624	-0.76888	0.682024
YOR209C	NPT1	-0.105064	-0.0540588	-0.0586692	-1.43841	-1.40793	-1.02047	-1.87913	-1.76539	-1.56312	-1.3258	-0.157743
YMR015C	ERG5	-1.55348	-1.33506	-1.41762	-1.82284	-1.9641	-1.61305	-1.17443	-0.944414	-0.872232	-1.21285	0.0420004
YLL029W	FRA1	-0.340747	0.0632192	-0.102872	-1.49799	-1.4445	-0.988827	-2.43173	-2.3244	-2.21525	-2.22466	0.194851
YPR137W	RRP9	0.034239	0.197764	0.292441	-0.947447	-1.39924	-0.950305	-2.15984	-1.84675	-2.02773	-1.97059	-0.664738
YGL228W	SHE10	-0.206991	0.084444	-0.0983787	-1.85673	-1.09845	-0.560824	-2.15988	-1.87105	-2.0375	-1.76331	0.0843031
YDR293C	SSD1	-0.166615	0.13254	-0.140948	-2.13064	-1.24331	-0.730978	-1.69698	-1.70379	-1.77915	-1.56201	0.418746
YGL048C	RPT6	-0.256887	-0.0743647	-0.391644	-1.73111	-1.5535	-0.863996	-2.10285	-1.80825	-1.67658	-1.91895	0.358344
YLR262C-A	TMA7	-0.256249	0.0543858	0.094541	-1.36352	-1.41916	-0.578146	-2.67879	-2.01864	-1.79966	-1.28568	-0.399389
YEL031W	SPF1	-0.301821	-0.0283056	-0.202628	-1.54007	-0.989487	-0.559225	-1.96076	-1.81291	-1.75127	-1.51976	-0.207881
YNL098C	RAS2	-0.390694	-0.0626006	-0.294274	-2.05701	-1.60401	-1.25049	-1.5735	-1.59627	-1.74527	-1.77505	0.335337
YGR204W	ADE3	-0.645063	-0.23923	-0.475915	-1.26533	-1.45166	-1.16448	-1.27726	-1.01441	-1.12481	-1.27916	0.041174
YEL013W	VAC8	-0.00617484	0.123365	-0.00749489	-1.55066	-0.950728	-0.665837	-1.77606	-1.72569	-1.82215	-1.45325	0.20851
YER030W	CHZ1	-0.219847	0.206159	0.25386	-1.51061	-0.790628	0.026411	-2.9404	-1.71114	-1.68422	-1.53152	0.189737
YFL005W	SEC4	-0.211491	-0.00330616	-0.115437	-1.28323	-0.838162	-0.503956	-2.8391	-1.83161	-2.09772	-1.78532	-0.0556775
YOL029C	YOL029C	-0.314777	-0.253691	-0.0629607	-1.46706	-1.31167	-0.982095	-1.62511	-1.61422	-1.59528	-1.92608	-0.181361
YNL157W	IGO1	-0.0970592	-0.0434124	0.23855	-1.74798	-1.04039	-0.690089	-1.69956	-1.62834	-1.86295	-1.87272	0.202387
YCL064C	CHA1	-0.797257	-1.99233	-1.04587	-1.9236	-3.53713	-3.19744	-0.872456	-0.0525542	-0.21975	-0.581193	-0.128914
YMR125W	STO1	-0.0566926	0.125135	0.0248763	-1.74712	-1.20425	-0.675234	-3.66117	-2.65017	-2.4577	-2.40775	-0.201876
YJL061W	NUP82	-0.0393264	0.158839	0.153772	-1.64739	-0.995329	-0.582794	-2.06888	-1.83392	-1.8434	-1.7224	-0.210749
YOR046C	DBP5	-0.103664	0.082439	0.0360398	-1.40339	-1.06187	-0.468263	-2.61068	-2.09172	-2.16884	-1.80896	-0.262972
YJL138C	TIF2	-0.116611	-0.0496794	-0.0856516	-1.15211	-1.27495	-0.928535	-1.21896	-1.34168	-1.36281	-0.902355	-0.279702
YFR031C-A	RPL2A	-0.217307	-0.0132037	-0.319995	-1.16478	-1.7954	-1.35218	-3.16383	-1.81798	-1.68078	-1.3581	-0.111746
YJR139C	HOM6	-0.254721	-0.24273	-0.231498	-0.911004	-0.962784	-0.580325	-1.93056	-1.48242	-1.53014	-1.45161	0.0837558
YOL004W	SIN3	-0.280647	0.0457436	-0.136505	-1.77534	-1.11055	-0.578844	-2.24592	-2.05732	-2.02587	-1.87005	0.0977164
YPR033C	HTS1	-0.0631206	0.26619	0.134155	-0.734939	-0.684656	-0.439568	-2.73426	-1.82137	-1.75596	-1.77945	-0.360811
YJL140W	RPB4	0.0524899	0.299604	0.258363	-1.34325	-1.10272	-0.53556	-1.80307	-1.61305	-1.64298	-1.67059	0.312808
YER112W	LSM4	0.0612139	0.1752	0.278623	-1.60295	-0.817072	-0.50832	-1.76917	-1.60702	-1.78347	-1.86116	-0.115634
YGL114W	YGL114W	-0.75903	-0.702817	-0.550806	-1.42612	-1.92676	-1.56651	-0.818206	-0.61456	-0.464409	-0.873544	0.0465594
YOR051C	ETT1	-0.233233	-0.00709988	0.0920929	-1.55667	-1.67808	-1.12277	-3.06197	-1.85587	-1.69648	-1.90914	-0.430569
YML129C	COX14	-0.0422019	0.22046	-0.21404	-1.64797	-1.2982	-0.861939	-1.74405	-1.41849	-1.55518	-2.23471	0.628944
YDR211W	GCD6	-0.113506	0.250738	0.142364	-1.06842	-1.16574	-0.665655	-2.25491	-1.98901	-2.03018	-1.95988	-0.257311
YKL181W	PRS1	-0.00017648	0.256186	-0.0560089	-0.909629	-1.43532	-1.0284	-2.34824	-2.0727	-2.18775	-1.81718	-0.660515
YDL191W	RPL35A	-0.279682	-0.249384	-0.176408	-1.03566	-1.52117	-1.18915	-2.09417	-1.56857	-1.49612	-1.21957	-0.444633
YDR483W	KRE2	-0.205148	-0.0898902	-0.359626	-1.74469	-1.8241	-1.36673	-2.57591	-2.05685	-1.98774	-1.86874	0.0519389
YJL167W	ERG20	-0.320842	-0.122716	-0.200653	-2.03604	-1.18173	-0.675804	-1.65287	-1.32043	-1.36821	-1.02188	-0.0336982
YCR020W-B	HTL1	0.109294	0.076096	0.647829	-0.882759	-1.18727	-0.611385	-2.26508	-2.65593	-1.95122	-1.79779	-0.210339
YBR279W	PAF1	-0.278152	0.11938	0.162262	-1.92434	-1.24865	-0.785008	-2.38285	-1.78494	-2.03583	-1.92064	-0.1278
YJL174W	KRE9	-0.371603	-0.0454643	-0.160706	-1.49619	-1.35082	-0.790933	-2.10922	-1.88107	-1.67859	-2.09061	0.4526
YJR145C	RPS4A	-0.361206	-0.0727852	-0.242199	-1.1156	-1.54246	-0.997875	-2.8539	-1.84479	-1.8137	-1.49186	-0.351504
YOR260W	GCD1	-0.00292941	0.198881	0.216372	-1.32574	-1.26197	-0.960501	-1.48761	-1.42688	-1.58459	-1.70062	-0.57245
YOR317W	FAA1	-0.730092	-0.556823	-0.615624	-2.968	-1.29445	-1.02825	-2.16815	-1.27312	-1.4963	-1.70434	1.54447
YNL037C	IDH1	-2.20906	-1.54294	-2.17553	-2.41286	-4.62384	-4.01944	0.146091	-0.12404	0.370241	-0.540168	0.44558
YER049W	TPA1	-0.233383	-0.257525	-0.127124	-0.986174	-1.56158	-1.18547	-2.26333	-2.07887	-1.87041	-1.68642	-0.808522
YBR031W	RPL4A	-0.343848	-0.096546	-0.179745	-0.93763	-1.49066	-1.08902	-1.82274	-1.32912	-1.42043	-1.18049	-0.780288
YKL016C	ATP7	-0.119269	0.0897669	-0.15455	-1.05543	-0.585815	-0.209345	-2.12036	-1.42522	-1.52791	-1.50542	0.987167
YOR184W	SER1	-0.333856	-0.471532	-0.590261	-0.620199	-1.17938	-0.853232	-1.20159	-0.713653	-0.550957	-0.964222	-0.208412
YER141W	COX15	-0.403808	-0.137999	-0.419486	-1.48902	-0.872041	-0.508403	-2.20776	-2.12524	-1.60022	-1.78162	1.66574
YLR106C	MDN1	-0.0565296	0.123888	0.0866916	-1.31756	-1.21759	-0.71318	-1.96883	-1.8892	-1.95138	-1.58306	-0.570917
YER155C	BEM2	-0.185794	-0.0186068	-0.261187	-1.44434	-1.27291	-0.724661	-2.45468	-2.00318	-2.17639	-1.84115	-0.0734179
YGR065C	VHT1	-0.904007	-1.38227	-0.117609	-0.151326	-1.77357	-1.91489	-1.18654	-1.3519	-0.732822	-1.21178	-0.00788296
YDR309C	GIC2	-0.450291	-0.152061	-0.184645	-1.44759	-1.34014	-0.638305	-1.13266	-0.592705	-0.74539	-1.04139	0.589673
YER110C	KAP123	-0.137831	0.152388	0.0136903	-1.21557	-1.50731	-0.914059	-2.51173	-1.9062	-1.92246	-1.60848	-0.856819
YHR019C	DED81	-0.133887	0.093327	-0.151799	-0.890118	-1.49896	-1.10867	-2.42769	-1.91423	-1.8424	-1.57065	-0.456739
YDR372C	VPS74	0.168821	0.21621	0.193489	-1.60013	-1.143	-0.670243	-1.72338	-1.68416	-1.57009	-1.61927	0.201746
YBR071W	YBR071W	-1.31681	-0.900931	-0.735562	-3.42731	-2.81892	-2.26023	-0.519011	-0.419251	-0.603738	-0.847179	0.816747
YDR308C	SRB7	0.0664551	0.193866	0.229922	-1.19683	-0.656452	-0.338985	-2.18437	-2.10462	-2.22058	-1.67472	-0.101537
YKL160W	ELF1	-0.126401	0.213182	-0.104855	-1.46599	-1.17205	-0.657823	-2.37896	-1.36063	-1.62187	-1.29347	-0.0209415
YDL132W	CDC53	-0.103233	0.0842375	0.165991	-1.71927	-1.02593	-0.41779	-1.51401	-1.27041	-1.66816	-1.52555	0.355201
YPR062W	FCY1	0.0191708	0.303984	-0.0339573	-1.36271	-1.31322	-1.13187	-2.87048	-1.71819	-1.52038	-1.64901	-0.142736
YOR123C	LEO1	-0.196616	0.151354	0.181399	-1.58325	-1.31933	-0.597782	-2.17609	-1.84	-1.99607	-2.00896	-0.177082
YDL066W	IDP1	0.0806995	0.0695183	0.048147	0.010147	-0.321581	-0.0595158	-0.717129	-0.351143	-0.454544	-0.717961	0.391267
YBL004W	UTP20	0.00321305	0.15309	0.0796984	-1.29712	-1.44938	-0.941238	-2.39412	-2.25405	-2.14047	-1.78749	-0.88656
YCR028C-A	RIM1	-0.0970356	0.100619	0.00970257	-1.27334	-1.04119	-0.691856	-2.70083	-1.91334	-2.1167	-1.95925	-0.0505317
YNL137C	NAM9	0.134918	0.203741	0.084193	-1.60019	-1.29115	-0.767596	-1.88822	-1.91036	-1.76497	-1.7289	0.0915373
YPL158C	AIM44	-1.32563	-0.975736	-0.428797	-2.30942	-2.50651	-2.16118	-0.41593	-0.163959	-0.488409	-0.617456	-0.229911
YLR244C	MAP1	-0.264937	-0.138264	-0.217321	-1.71964	-2.16725	-1.51988	-1.80464	-1.91638	-1.83234	-1.44436	-0.414065
YPR028W	YOP1	-0.434854	-0.432539	-0.745742	-2.31673	-1.81419	-0.999858	-1.73454	-1.71821	-1.42458	-1.16268	0.372744
YNL084C	END3	-0.14626	0.00971098	0.0375308	-1.96977	-1.03639	-0.584441	-2.16645	-1.72404	-1.8317	-1.70278	0.124259
YGR270W	YTA7	-0.217948	0.0117134	0.0128967	-1.97147	-1.01122	-0.465089	-2.1724	-1.96865	-2.14252	-1.93419	0.473917
YOL081W	IRA2	-0.219871	-0.0233211	-0.184052	-1.80281	-1.17834	-0.63914	-2.35399	-2.06745	-2.03908	-1.93052	0.367423
YDR074W	TPS2	-0.555587	-0.464304	-0.957041	-3.73918	-1.66144	-1.19163	-1.41972	-0.669571	-0.8248	-1.40189	2.60594
YBL051C	PIN4	-0.10746	0.166086	0.0588136	-1.95817	-1.36415	-0.716703	-1.70888	-1.52123	-1.52049	-1.56638	0.20752
YGL137W	SEC27	-0.121277	0.100886	-0.0794321	-1.76564	-1.21246	-0.686921	-2.16429	-1.84525	-1.82712	-1.62478	0.123524
YBL047C	EDE1	-0.278068	-0.0537979	-0.173422	-2.36023	-1.26958	-0.784944	-1.95704	-1.59234	-2.03356	-1.67431	0.144847
YLR196W	PWP1	-0.127736	0.142795	0.175444	-0.563382	-1.52094	-0.863079	-2.42105	-2.03774	-2.04579	-1.8206	-0.900797
YDL195W	SEC31	-0.330171	-0.0335378	-0.186522	-1.99116	-1.34523	-0.764626	-2.15388	-1.83094	-1.74141	-1.634	0.143119
YGL252C	RTG2	-0.230527	-0.145836	-0.141982	-1.51625	-0.97309	-0.587536	-2.02933	-2.1102	-1.97018	-2.0101	0.109409
YKR066C	CCP1	-0.232745	0.29191	-0.825697	-1.30915	-1.71794	-1.41417	0.102262	-0.117172	0.170522	-0.529789	0.431444
YHR208W	BAT1	0.173728	0.49545	0.0307034	0.088824	0.000398297	0.160156	-1.16265	-0.875532	-0.88109	-0.863273	-0.60299
YNL307C	MCK1	-0.0709425	-0.0204114	-0.131687	-1.92567	-0.928029	-0.623712	-1.99935	-1.88897	-1.7374	-1.74834	-0.0819503
YIR017C	MET28	-0.371091	-0.12125	0.142543	-0.633529	-1.17936	-1.19812	0.351588	-0.260834	-0.209557	-0.946776	1.00528
YPL126W	NAN1	-0.0775008	0.157638	0.0719946	-0.942254	-1.60043	-1.17173	-2.46428	-2.40519	-2.33868	-2.007	-0.791989
YDR529C	QCR7	0.0128621	0.5186	-0.114741	-0.990875	-0.732283	-0.168709	-1.92878	-1.15839	-0.998635	-1.28274	1.09108
YDL134C	PPH21	-0.00911166	0.139759	-0.00143086	-1.68935	-1.30413	-0.724624	-1.83728	-1.80005	-1.61567	-1.95676	0.251577
YLR025W	SNF7	-0.0662198	0.218816	0.224757	-1.65141	-0.931769	-0.463581	-2.0737	-2.01597	-1.87239	-2.12217	0.137924
YDR168W	CDC37	0.0965413	0.13921	-0.0121357	-1.49164	-0.988531	-0.542419	-2.30209	-1.94537	-2.05865	-2.03755	0.245389
YJR076C	CDC11	-0.296366	-0.109542	-0.0259682	-2.08436	-1.56218	-0.905858	-2.4418	-1.96185	-2.02674	-2.16438	0.053031
YDR025W	RPS11A	-0.170008	0.00416632	-0.25934	-1.12507	-1.56945	-1.11984	-2.56217	-1.76742	-1.76651	-1.39483	-0.485311
YOR194C	TOA1	-0.0740809	0.0194766	0.237974	-1.74992	-1.33411	-0.480354	-2.20686	-1.44372	-1.92102	-2.04548	-0.0396583
YMR311C	GLC8	0.0285856	0.0738575	0.211859	-1.63495	-1.12329	-0.463105	-2.08947	-1.48866	-1.66924	-1.92442	0.34717
YGR187C	HGH1	0.0699272	0.145496	0.401533	-0.97637	-1.48004	-0.962331	-3.33626	-3.00194	-2.78075	-2.54151	-0.82525
YOR014W	RTS1	-0.288407	-0.00581827	-0.0615068	-1.93721	-1.19516	-0.619279	-1.86792	-1.69408	-1.90177	-1.68582	0.211334
YHR089C	GAR1	-0.123961	0.0812144	-0.383999	-1.02575	-1.63541	-1.21181	-2.95048	-2.20002	-1.65294	-1.91014	-0.588355
YLR406C	RPL31B	-0.248508	-0.128721	-0.407311	-1.11777	-1.80497	-1.47526	-3.40203	-2.29886	-2.00601	-1.88068	-0.076516
YPL235W	RVB2	-0.151465	0.121491	0.0291858	-1.55264	-1.45968	-0.890774	-2.20825	-1.83166	-1.92739	-1.89651	-0.249255
YLR399C	BDF1	-0.957375	-0.915999	-0.913666	-3.2821	-2.22039	-1.76918	-0.203335	0.176541	-0.0651722	-0.280157	0.039362
YPL169C	MEX67	-0.0944429	0.0694961	0.0685699	-1.81467	-1.24941	-0.80437	-1.9102	-2.00927	-2.0872	-1.95723	-0.193709
YBR221C	PDB1	-0.190918	-0.0506807	-0.22283	-1.39027	-1.24583	-0.882335	-2.40377	-1.90348	-1.75843	-1.64238	0.256079
YMR195W	ICY1	-0.620813	-0.604632	-0.647903	-2.3178	-1.38532	-1.48788	0.0225383	0.515006	0.652449	-0.739502	0.977311
YMR266W	RSN1	-0.947502	-1.16989	-1.06004	-2.37375	-3.08956	-2.73387	-1.03148	-0.964449	-0.783554	-1.15857	-0.647182
YFR001W	LOC1	-0.108034	0.185781	0.234204	-1.15159	-1.18482	-0.779685	-2.67619	-2.38241	-2.28467	-2.17807	-0.69629
YBL079W	NUP170	-0.146776	0.0664415	-0.0607209	-1.73673	-1.31857	-0.797827	-2.09888	-2.00896	-2.03432	-1.83921	-0.304223
YDL031W	DBP10	0.0079645	0.353012	0.267286	-1.1683	-1.11126	-0.487081	-2.41836	-2.12798	-2.39547	-1.70994	-0.459108
YLR387C	REH1	-0.0527385	-0.0583326	-0.217018	-1.25883	-1.26664	-0.616541	-1.65789	-1.78541	-2.13505	-1.88807	0.0917722
YFR030W	MET10	0.0944969	0.082976	-0.343943	0.954215	0.00813978	0.161697	-0.479407	-1.23674	-1.08107	-1.23424	0.330126
YBR191W	RPL21A	-0.406413	-0.18118	-0.230787	-1.25148	-1.81883	-1.31509	-2.64597	-1.76844	-1.70852	-1.39609	-0.346308
YLR449W	FPR4	-0.203424	0.222801	0.230161	-1.44898	-1.62818	-0.95107	-2.90058	-2.08647	-2.21161	-1.97558	-0.891222
YGR281W	YOR1	-0.802698	-1.12814	-1.12242	-2.81158	-2.35497	-1.9813	-1.19999	-0.733575	-0.518351	-0.943188	0.0200374
YDR404C	RPB7	-0.070337	0.154573	-0.104943	-1.85494	-1.43893	-1.03933	-2.06306	-1.97972	-1.70667	-2.09428	-0.221609
YPL063W	TIM50	-0.314636	0.112654	0.0555346	-1.72742	-1.37022	-0.972358	-2.77622	-2.17762	-2.20266	-2.01042	-0.188745
YML108W	YML108W	0.21565	0.104818	0.35262	-0.303362	-0.778088	-0.340275	-2.73931	-2.89864	-2.50391	-2.09032	-0.485835
YHR205W	SCH9	-0.171397	0.0302005	-0.040348	-1.36499	-1.11461	-0.599743	-2.07248	-1.97408	-2.10196	-2.02787	-0.243976
YDL153C	SAS10	0.025833	0.335422	0.412527	-0.8951	-1.43266	-0.836485	-2.59487	-2.13712	-2.23114	-1.8175	-1.14544
YLR452C	SST2	0.0180315	0.00824823	-0.229484	-0.568914	-1.87575	-1.43634	-0.410526	-0.0432975	-0.438667	-0.399204	-0.890588
YJL158C	CIS3	-1.41003	-1.01004	-1.09946	-2.12579	-3.54657	-3.01234	-1.23756	-0.418033	-0.233082	-0.885791	0.245224
YLL018C	DPS1	-0.103241	0.367188	0.0544931	-0.957737	-0.964227	-0.500215	-2.17955	-1.52771	-1.63965	-1.48345	-0.273099
YDR069C	DOA4	-0.226063	-0.402415	-0.286607	-1.97464	-1.4936	-1.22992	-1.27268	-1.47998	-1.49371	-1.34759	0.336359
YBR039W	ATP3	-0.152971	0.0615734	-0.0925675	-1.53933	-0.755679	-0.260833	-1.86538	-1.4748	-1.53435	-1.38339	0.861486
YGL167C	PMR1	-0.114643	-0.00260766	-0.0218399	-1.70309	-1.08498	-0.600257	-2.08348	-1.97807	-1.98485	-1.78266	0.207615
YHR068W	DYS1	-0.287525	-0.142152	-0.226947	-1.29504	-1.38222	-1.05215	-2.29864	-1.76755	-1.7036	-1.58798	-0.515877
YBR207W	FTH1	-0.336343	-0.366596	-0.055849	-1.05651	-1.30448	-1.12442	-2.23031	-2.16425	-2.02541	-1.97669	0.236208
YER125W	RSP5	-0.224811	0.0867208	-0.148633	-2.01628	-1.53153	-0.955789	-2.19192	-1.9593	-1.93798	-1.79814	-0.0266801
YDR303C	RSC3	-0.0133863	0.152823	0.263543	-2.20585	-1.2617	-0.812202	-1.90571	-2.08179	-1.96206	-1.92332	-0.327507
YGL092W	NUP145	-0.1726	0.037382	-0.0425721	-1.6443	-1.37625	-0.90265	-2.23083	-1.95593	-2.12973	-1.87376	-0.519082
YJL123C	MTC1	-0.187043	0.16865	0.0188398	-1.63683	-1.23408	-0.785047	-2.51471	-2.36876	-2.33015	-2.31662	-0.0470548
YOL097C	WRS1	0.0651017	0.293813	0.043801	-1.20661	-1.25769	-0.944078	-2.98485	-2.15802	-2.03197	-2.07483	-0.87676
YOR362C	PRE10	-0.289303	-0.139534	-0.357612	-1.64292	-1.80604	-1.23219	-2.4253	-1.83035	-1.80535	-2.09964	0.254648
YKL007W	CAP1	-0.184144	0.111396	-0.098691	-2.12361	-0.992994	-0.677308	-2.05257	-1.66592	-1.63173	-1.81968	0.752253
YHR066W	SSF1	-0.0524095	0.28631	0.453488	-0.59985	-1.41576	-0.901929	-2.40632	-2.25389	-2.19049	-1.94115	-0.992202
YGR119C	NUP57	-0.0833282	0.211627	0.12165	-1.47164	-1.10697	-0.702214	-1.82373	-1.57785	-1.73414	-1.95646	-0.0632437
YDR324C	UTP4	-0.0386235	0.297853	0.22695	-1.1826	-1.35555	-0.88986	-2.80984	-2.67263	-2.818	-2.18381	-1.11294
YGL202W	ARO8	-0.20685	0.0244606	-0.203006	-1.02793	-1.48333	-1.05593	-2.31049	-1.50388	-1.40546	-1.32051	-0.0827321
YDR322C-A	TIM11	-0.082423	0.141056	-0.0485604	-1.10551	-0.395816	0.122398	-2.18778	-1.58485	-1.35051	-1.7852	0.780295
YKL195W	MIA40	-0.180475	0.0653735	-0.0475402	-1.93548	-1.38532	-0.919465	-2.09982	-1.6751	-1.99356	-2.2442	0.615234
YDR052C	DBF4	-0.262995	0.0388731	0.14184	-1.87725	-1.2853	-0.643172	-2.09011	-2.01412	-2.14555	-1.9802	-0.320874
YDR245W	MNN10	-0.0954631	-0.138677	-0.218215	-1.56214	-1.35931	-1.02458	-2.2813	-2.12574	-1.81437	-1.92965	-0.654101
YML008C	ERG6	-1.35145	-1.06893	-1.29821	-2.32179	-2.39852	-1.98354	-2.40822	-1.59418	-1.51086	-1.46992	-0.223582
YMR083W	ADH3	-0.605138	-0.412736	-0.788968	-0.48255	-1.08193	-1.0054	-2.30885	-1.7178	-1.37802	-1.64811	0.232168
YBR172C	SMY2	0.0402301	0.225383	0.247288	-1.16386	-1.07766	-0.706518	-1.86543	-1.71413	-2.06089	-1.92934	-0.464219
YJR137C	MET5	-0.0575608	0.321347	-0.501155	1.40635	-0.0309251	-0.0153261	0.0558055	-1.16716	-0.973053	-1.3112	0.374894
YML053C	YML053C	-0.0352018	0.421031	0.30931	-1.82547	-1.13202	-0.573464	-2.08229	-2.09994	-2.11147	-2.44088	0.0617167
YDL100C	GET3	-0.200279	0.0350118	-0.195918	-1.51995	-0.977519	-0.524654	-2.31016	-1.7085	-1.79989	-1.67384	0.236013
YLR208W	SEC13	-0.178585	0.0323741	-0.0633915	-1.46876	-1.02538	-0.579627	-1.92909	-1.76332	-1.78145	-1.76395	0.142033
YDR145W	TAF12	0.00552904	0.227811	0.261034	-1.73213	-0.964014	-0.520917	-2.0245	-1.71357	-1.73235	-2.032	0.0214798
YDR412W	RRP17	-0.0552241	0.220779	0.325338	-1.35652	-1.23279	-0.737582	-2.65188	-2.04067	-2.42394	-2.59565	-0.69614
YHR098C	SFB3	-0.366281	-0.190386	-0.216133	-1.94139	-1.42502	-1.03192	-2.7105	-2.29939	-2.41932	-2.07729	0.0713754
YGR284C	ERV29	-0.216937	-0.0740092	-0.165092	-1.96506	-1.15792	-0.709592	-2.68026	-2.45047	-1.92766	-2.17321	0.46801
YML117W	NAB6	-0.347541	-0.169584	-0.379388	-2.05951	-1.36533	-0.971782	-2.2512	-1.94167	-2.17808	-2.08285	0.526205
YIL109C	SEC24	-0.419195	-0.0836948	-0.308674	-1.84939	-1.51561	-1.02095	-2.30499	-1.91019	-2.01772	-1.87662	-0.105171
YOR182C	RPS30B	-0.0453274	-0.120829	-0.0729861	-0.768919	-1.46213	-1.03956	-2.2894	-1.92424	-1.60786	-1.31896	-0.0566402
YML072C	TCB3	-0.332219	-0.0391897	-0.34946	-1.91705	-1.59249	-1.06268	-2.51319	-1.87605	-2.02528	-1.71583	0.0761734
YDL205C	HEM3	-0.0419084	0.038932	-0.00214457	-1.25594	-1.61663	-0.996283	-0.673453	-0.966993	-0.914019	-1.10241	-0.261387
YDR208W	MSS4	-0.252557	-0.00200177	0.00239472	-1.68521	-1.23186	-0.826508	-2.16328	-2.2859	-2.11696	-2.10432	0.268839
YLR403W	SFP1	-0.282863	-0.254945	-0.18825	-1.31741	-1.24703	-0.982886	-1.69671	-1.98204	-2.03501	-1.55926	-0.366512
YNL302C	RPS19B	-0.232745	-0.0736098	-0.331398	-1.17867	-1.58218	-1.1953	-2.47346	-1.65268	-1.63006	-1.31747	-0.0340897
YOR058C	ASE1	-0.038734	-0.213027	-0.09542	-0.857202	0.096629	0.117156	-1.56316	-1.48226	-1.60926	-1.65774	-0.208115
YDR251W	PAM1	-0.272948	-0.169872	-0.289998	-2.11246	-1.36643	-0.920922	-2.29513	-2.32634	-2.23486	-2.2028	0.383062
YDR361C	BCP1	-0.0746668	0.0386595	-0.0180481	-0.843892	-1.42	-1.14073	-2.64543	-2.3972	-2.20218	-2.35186	-0.746925
YDR170C	SEC7	-0.143435	0.0538574	-0.0630458	-1.69242	-1.24248	-0.647048	-2.25386	-1.78158	-1.84238	-1.62466	0.116862
YHR023W	MYO1	-0.167592	-0.0626898	-0.0131478	-1.91715	-1.13495	-0.553263	-2.76949	-2.41644	-2.51961	-2.18233	0.159489
YPL218W	SAR1	-0.279341	0.024836	-0.093356	-1.44629	-0.970942	-0.499655	-2.27095	-1.86738	-1.15782	-1.46502	-0.0304011
YLR309C	IMH1	-0.0304284	0.206623	0.33892	-1.61051	-0.451247	0.170544	-2.19572	-1.85526	-2.0644	-2.04594	0.0710249
YHR010W	RPL27A	-0.224914	-0.119706	-0.203553	-0.947138	-1.51659	-1.01421	-2.2801	-1.79297	-1.66075	-0.983469	-0.0685476
YJR073C	OPI3	-1.58182	-0.941902	-0.124899	-5.47187	-4.11212	-3.45912	-1.94939	-2.4417	-1.80427	-1.6524	-0.0138726
YLR192C	HCR1	-0.293684	-7.96e-05	0.0965894	-1.17823	-1.33381	-0.769882	-2.9237	-1.80851	-2.10239	-1.81231	-0.113441
YDL004W	ATP16	-0.198579	0.0609369	-0.42125	-1.74378	-0.781191	-0.445989	-2.49971	-1.80766	-1.7539	-1.80286	0.522996
YJR002W	MPP10	-0.00184874	0.208813	0.266072	-1.18195	-1.3403	-0.86735	-2.32395	-2.39638	-2.57315	-1.94676	-0.62889
YMR033W	ARP9	-0.0450323	0.074252	0.108883	-1.64396	-1.00102	-0.501001	-1.59287	-1.95654	-2.13145	-1.78578	-0.347066
YNL247W	YNL247W	-0.130822	0.130298	0.0232899	-1.29163	-1.47428	-0.938474	-2.01145	-1.69912	-1.90864	-1.63426	-0.299187
YOR047C	STD1	-0.148437	-0.0256432	-0.04436	-1.82854	-1.68608	-1.23189	-1.14058	-0.920234	-1.09346	-1.15204	-0.252352
YGL026C	TRP5	0.0331276	0.184063	-0.107828	-0.549442	-0.873772	-0.618409	-2.1364	-1.70215	-1.44535	-1.61185	0.281308
YCR002C	CDC10	-0.0489942	-0.0170914	0.0813641	-1.43375	-0.86881	-0.476667	-2.25693	-1.97128	-1.72358	-1.96444	0.177233
YLR435W	TSR2	0.0130939	0.261776	0.116872	-0.88473	-1.0164	-0.393482	-2.66706	-2.30501	-2.08372	-2.16089	-0.762182
YGR189C	CRH1	-0.890883	-0.701025	-0.640411	-1.82386	-2.02783	-1.33671	-1.14324	-0.613981	-0.618171	-0.941555	0.899078
YDL015C	TSC13	-0.254543	-0.113117	-0.27758	-1.59473	-1.54268	-0.953252	-2.49352	-2.04967	-1.70244	-1.50205	-0.0132531
YDR457W	TOM1	-0.0250516	0.19658	0.0232372	-1.61182	-0.94622	-0.480322	-1.64824	-1.58955	-1.67127	-1.49259	-0.0457451
YKL135C	APL2	-0.1457	0.0920351	0.0943347	-1.59813	-0.82881	-0.397872	-2.02887	-1.87293	-2.02468	-1.83698	0.139405
YKL142W	MRP8	-0.257243	-0.527005	-0.442194	-2.76317	-1.54365	-1.12183	-2.24162	-1.45041	-1.85043	-1.61625	1.73633
YJR065C	ARP3	-0.253525	0.0626282	-0.0986119	-2.2796	-1.34791	-0.86254	-1.94701	-1.53385	-1.57351	-1.70855	0.60669
YKL086W	SRX1	-1.43133	-0.643707	-1.55889	-1.98945	-2.72034	-2.26762	0.406172	0.497133	0.446311	-0.432651	1.11422
YDL051W	LHP1	-0.0477897	0.294839	0.0401102	-0.891117	-1.17149	-1.01333	-2.67577	-2.17369	-2.44936	-2.05672	-0.652437
YLR129W	DIP2	-0.00699621	0.186718	0.132168	-1.21982	-1.39753	-0.801013	-2.48149	-2.25981	-2.32464	-1.91331	-0.816402
YKL014C	URB1	0.0193567	0.196091	0.278355	-1.40774	-1.27063	-0.743552	-2.08633	-1.93031	-1.8921	-1.74736	-0.905025
YJL039C	NUP192	-0.139684	0.00264555	0.0205459	-1.7076	-1.28686	-0.765855	-2.03861	-1.88821	-1.87485	-1.74386	-0.059383
YJL122W	ALB1	0.149395	0.352162	0.335891	-0.968809	-1.54887	-1.19639	-2.85471	-2.07625	-2.29483	-2.22859	-0.823215
YGL070C	RPB9	0.163174	0.171421	0.0135104	-1.20608	-1.25165	-0.860312	-1.89519	-1.6617	-1.44627	-1.63338	-0.288525
YLL051C	FRE6	-0.681238	-0.444377	-0.165213	-0.878988	-1.76361	-1.60164	-1.83682	-2.41551	-2.19833	-2.08053	-0.317919
YER042W	MXR1	-0.513349	-0.52596	-0.64838	0.328007	-1.27138	-1.07524	-0.625201	-1.12978	-0.292911	-1.10962	-0.392022
YDL161W	ENT1	-0.210681	0.0370458	0.0798492	-1.67507	-1.12726	-0.505996	-2.16477	-2.00672	-2.20978	-2.24773	0.184643
YKL077W	YKL077W	-0.309549	-0.00899986	-0.0998389	-1.60374	-1.2059	-0.817811	-2.51841	-2.22992	-1.85273	-1.93238	0.00922205
YLR170C	APS1	-0.10271	0.0166048	0.00703349	-1.74907	-1.10727	-0.622142	-2.57056	-1.9143	-1.74137	-1.90184	0.341598
YMR216C	SKY1	-0.135508	-0.00971391	-0.105918	-1.39629	-1.49597	-1.10634	-2.00839	-1.88667	-2.02805	-2.0732	-0.0249911
YLR223C	IFH1	-0.0132758	0.222319	0.369862	-0.742328	-1.01418	-0.531894	-1.81395	-1.83024	-2.02675	-1.74146	-0.611993
YNL271C	BNI1	-0.151541	0.0767624	0.0423674	-1.96582	-1.28949	-0.720264	-2.23383	-1.94853	-2.13743	-1.7872	0.213022
YGL225W	VRG4	-0.461293	-0.166919	-0.434706	-1.64201	-1.49449	-1.17614	-1.96653	-1.79156	-1.18932	-1.49145	-0.0190991
YLR206W	ENT2	-0.229345	0.12017	0.0264788	-2.23032	-1.27808	-0.726764	-1.83807	-1.64295	-1.88939	-2.02598	0.652149
YER117W	RPL23B	-0.156436	0.0234207	-0.313372	-0.857297	-1.60423	-1.09231	-2.46952	-1.95663	-1.53148	-1.35346	-0.227441
YNR035C	ARC35	-0.205679	0.133703	-0.0315677	-1.92683	-1.32924	-0.688287	-2.18502	-1.74373	-1.78223	-2.12493	0.597882
YGL117W	YGL117W	-0.479589	-0.829188	-0.705787	-0.276501	-1.21219	-1.29217	-1.00159	-0.320238	-0.0884962	-0.706989	0.376759
YOR187W	TUF1	-0.2214	0.0854725	-0.17229	-1.73597	-0.881179	-0.421737	-2.5754	-1.95931	-1.94795	-2.07836	0.167549
YMR109W	MYO5	-0.179265	-0.0136507	-0.0827572	-2.13886	-1.24254	-0.731641	-1.93856	-1.74188	-1.95691	-1.72565	-0.0554279
YNL213C	RRG9	-0.0159662	-0.13566	-0.189683	-1.34702	-1.10854	-0.954343	-1.43085	-1.58945	-1.50663	-1.86182	-0.281279
YNL055C	POR1	-0.736058	-0.679578	-0.969714	-0.655491	-0.824731	-0.534044	-1.47683	-0.63831	-0.720571	-0.661971	1.08062
YOL038W	PRE6	-0.371186	-0.160972	-0.36298	-1.70494	-1.55742	-1.03203	-1.75786	-1.82273	-1.51256	-1.75211	0.212175
YER161C	SPT2	-0.151374	0.170916	0.226108	-1.62996	-1.14958	-0.585468	-2.07968	-1.58851	-1.74377	-1.86372	-0.169048
YJL179W	PFD1	0.31858	0.419882	0.395659	-1.12868	-0.771808	-0.170634	-2.46174	-1.97881	-1.62996	-2.09695	-0.137155
YLR225C	YLR225C	-0.455253	-0.243993	-0.25496	-1.52654	-0.797552	-0.0823474	-0.731524	-0.619898	-0.431224	-0.959489	0.539454
YLL048C	YBT1	0.0398431	0.18104	-0.0250478	-1.43713	-1.13113	-0.66254	-1.97538	-1.55527	-1.49261	-1.47937	-0.187339
YDR300C	PRO1	-0.0509256	0.0319667	0.155847	-1.19442	-1.22029	-0.789666	-2.27493	-2.11231	-2.21642	-2.12052	-0.535248
YPR133C	SPN1	-0.0237245	0.178412	0.144672	-1.42499	-1.07562	-0.502827	-1.68066	-1.51054	-1.65442	-1.63273	-0.191752
YHL047C	ARN2	-1.97318	-1.06375	0.384379	-0.915716	-3.43011	-3.11328	-1.81023	-1.2532	-1.10129	-1.36977	-0.388637
YML048W	GSF2	-0.227941	0.0439792	-0.277198	-1.60777	-1.28675	-0.915358	-1.21752	-1.57637	-1.37089	-0.917534	0.0448286
YOL076W	MDM20	-0.0749359	0.0549687	-0.0714105	-1.75324	-1.51682	-0.916455	-1.8608	-1.88557	-1.77204	-1.71205	-0.374499
YPR173C	VPS4	-0.186212	0.129691	-0.0230902	-1.74128	-1.30965	-0.706792	-2.09349	-1.76786	-2.05713	-2.17472	0.173284
YIL128W	MET18	-0.10295	0.171305	0.109195	-1.63124	-0.690745	-0.138785	-1.91408	-1.73993	-1.96779	-1.82196	-0.16867
YLR378C	SEC61	-0.353484	-0.0752941	-0.243979	-1.60839	-1.64948	-1.11613	-2.64549	-2.17891	-2.01997	-2.02595	-0.00974393
YKR001C	VPS1	-0.236313	0.0458223	-0.114333	-2.06471	-1.40066	-0.612873	-2.00777	-1.88594	-1.91928	-1.65355	0.042921
YHR081W	LRP1	-0.0634602	0.220169	0.282544	-1.29335	-1.11855	-0.907819	-2.34888	-2.43764	-2.05029	-2.35298	-0.530655
YNL175C	NOP13	-0.146182	-0.149145	0.0947566	-1.03246	-1.56839	-1.09873	-3.13472	-2.48102	-2.52331	-2.31711	-1.12069
YFR009W	GCN20	-0.105736	0.214862	-0.00444995	-1.72094	-1.44883	-0.818541	-2.57321	-2.17189	-2.21321	-1.80275	-0.252549
YDL022W	GPD1	-1.61321	-1.50942	-1.80923	-4.1473	-5.24328	-5.01226	-1.18889	-0.309729	-0.109441	-1.35033	1.7279
YGL068W	MNP1	-0.186106	0.206312	-0.00598826	-1.56137	-1.48927	-0.596229	-2.00277	-1.55828	-1.56495	-2.09891	0.0408724
YBR112C	CYC8	-0.297173	-0.12109	-0.0911424	-2.19183	-1.69503	-0.994476	-2.6504	-2.29749	-2.84653	-2.46744	-0.277205
YMR080C	NAM7	-0.151253	0.116808	0.0327567	-1.30605	-1.14215	-0.707821	-2.0993	-1.90714	-1.84889	-1.59392	-0.317091
YGR214W	RPS0A	-0.272747	-0.0337244	-0.142109	-1.2744	-1.57111	-1.22915	-2.32969	-1.50628	-1.6431	-1.21251	-0.245327
YPR029C	APL4	-0.141894	0.0313913	0.0567298	-2.00535	-0.997375	-0.546523	-1.9557	-1.88439	-1.94535	-1.7918	-0.0894176
YER086W	ILV1	0.0908972	0.240426	0.000514149	-0.541459	-0.633964	-0.324105	-2.21145	-1.93182	-2.01981	-1.70378	-0.278526
YMR200W	ROT1	-0.0698637	0.194396	-0.0122822	-0.892329	-0.742944	-0.428326	-2.08771	-2.35574	-1.73256	-2.36472	0.543246
YDR432W	NPL3	-0.585709	-0.387551	-0.314792	-1.62812	-1.75321	-0.993633	-1.70024	-1.9798	-1.61135	-1.17388	-0.361331
YCR035C	RRP43	-0.0102112	0.218125	0.213022	-1.10448	-1.1035	-0.571476	-2.27332	-2.27765	-2.5981	-2.15659	-0.252125
YMR031C	EIS1	-0.736458	-0.395256	-0.53082	-3.29841	-1.96127	-1.51872	-1.96182	-1.59182	-1.75612	-1.87058	0.839864
YLR250W	SSP120	-0.153969	-0.0136189	-0.0958227	-1.37321	-0.998762	-0.950637	-2.68159	-2.33167	-2.32541	-2.23112	0.573025
YKR035W-A	DID2	-0.0128335	0.150416	0.309347	-1.51804	-1.25146	-0.751238	-2.26011	-1.66039	-2.08843	-2.02771	0.198291
YIL027C	EMC5	-0.0270167	0.228366	0.315765	-1.2267	-0.610436	-0.397901	-2.05934	-1.71409	-1.72518	-1.56804	-0.151805
YHL040C	ARN1	-2.18683	-1.14117	-0.606209	-0.389285	-2.96397	-2.8859	-0.210191	-0.443248	-0.0816958	-0.826204	0.0446197
YCR016W	YCR016W	-0.0575848	0.121575	0.253352	-1.09101	-1.19859	-0.735686	-2.55155	-2.41188	-2.58713	-2.13777	-0.757314
YGR271C-A	EFG1	0.198957	0.244607	0.533876	-0.713466	-0.960498	-0.400375	-2.3556	-2.34229	-2.47822	-2.26615	-0.822666
YDL121C	YDL121C	0.234628	0.220085	0.230307	-0.448592	-0.780075	-0.414639	-2.51419	-2.09358	-2.03987	-1.72347	-0.301078
YPR148C	YPR148C	-0.113389	0.111354	0.00350029	-1.50844	-0.92549	-0.236701	-2.98124	-2.42474	-2.76083	-2.58957	0.498053
YLR330W	CHS5	-0.19187	0.10711	0.161853	-1.90957	-1.28104	-0.75209	-2.20978	-1.89206	-2.01497	-1.92637	0.189555
YLR222C	UTP13	0.0364351	0.285575	0.238485	-1.01165	-1.23469	-0.770338	-2.3971	-2.21063	-2.27794	-1.92109	-0.773935
YDR510W	SMT3	-0.41549	-0.114689	-0.459485	-1.78846	-1.73708	-1.13814	-2.65672	-1.83873	-0.858034	-0.923318	-0.0485476
YIL040W	APQ12	-0.0423142	0.0935873	0.0339164	-1.28304	-0.976855	-0.570563	-2.84432	-2.3701	-2.15594	-2.70706	-0.328207
YDL002C	NHP10	-0.0761145	-0.183781	-0.22732	-1.68657	-1.29096	-0.603895	-2.53698	-2.40352	-2.36914	-2.52749	-0.0449128
YNR001C	CIT1	-0.813725	-0.6328	-1.08634	-1.35325	-1.69332	-1.2797	-0.230964	0.397201	0.374804	-0.711179	1.56131
YDL099W	BUG1	-0.0647314	0.0985937	0.315414	-1.5704	-1.11449	-0.237045	-2.15988	-1.47855	-1.77203	-2.07422	0.019541
YDR339C	FCF1	0.00300496	0.0973912	0.144466	-1.22331	-1.32839	-0.573962	-2.04584	-1.97046	-2.41249	-2.04194	-0.528885
YMR043W	MCM1	-0.458796	-0.160743	-0.0772618	-2.13037	-2.43555	-1.66146	-1.43484	-1.06707	-1.11294	-1.33584	-0.109612
YML069W	POB3	-0.137104	0.114994	0.0913958	-1.62417	-0.909193	-0.331922	-1.95629	-1.72415	-1.99782	-1.70077	0.178845
YLR168C	UPS2	-0.438143	-0.318318	-0.0643454	-3.14764	-2.15776	-1.6589	-0.26068	-0.267769	-0.739007	-0.449799	0.454472
YLL009C	COX17	0.213397	0.366534	0.316414	-1.17873	-0.564851	0.283485	-2.12539	-1.87184	-1.48571	-1.66812	0.638123
YEL015W	EDC3	-0.270117	0.0820669	0.113234	-1.56456	-0.895363	-0.703436	-1.90684	-1.93892	-1.68346	-1.88252	0.0371832
YLL008W	DRS1	-0.0995149	0.40791	0.38159	-0.886743	-1.31581	-0.6941	-2.62555	-2.25049	-2.45166	-2.05477	-1.00095
YBR173C	UMP1	-0.186744	0.0633612	-0.0478441	-1.50718	-1.21234	-0.578981	-1.91782	-2.03887	-1.87922	-1.97564	0.198271
YIL130W	ASG1	-0.0300031	0.0981634	0.173048	-1.37663	-1.28009	-0.799433	-2.17742	-2.16122	-2.19033	-2.04596	-0.197367
YGR083C	GCD2	-0.032194	0.282491	0.398129	-1.32674	-1.20367	-0.604679	-2.30552	-1.77872	-2.1184	-2.03804	-0.414946
YOR028C	CIN5	-1.0111	-0.603223	-0.549534	-2.97815	-2.63148	-2.12275	-0.196979	0.0483542	-0.0220736	-0.854467	0.819395
YER138W-A	YER138W-A	-0.741459	-0.551401	-0.242898	0.225346	-0.290538	0.077646	-0.739922	0.0926224	-0.510088	-0.954226	0.568067
YIL074C	SER33	-0.27712	0.0325368	-0.573822	0.0909181	-1.12408	-1.12561	-0.891937	-1.80494	-1.64301	-1.7037	0.0555921
YJR064W	CCT5	-0.10905	0.0893079	-0.119818	-1.40668	-1.42297	-0.942892	-2.04942	-1.9401	-1.81608	-1.77346	-0.080155
YOR239W	ABP140	-0.14996	-0.0508555	-0.0382489	-1.72192	-1.10575	-0.666911	-2.33258	-1.76495	-2.35021	-1.9661	-0.249187
YMR049C	ERB1	-0.209412	0.203941	0.284534	-0.899281	-1.36215	-0.869762	-2.66283	-2.30323	-2.32666	-2.17347	-0.691712
YNL186W	UBP10	-0.208569	-0.0906639	-0.1588	-1.39999	-1.56228	-1.14728	-2.77044	-2.68713	-2.78647	-2.19064	-0.480152
YGR105W	VMA21	0.00889143	0.241484	-0.0566317	-1.47693	-1.021	-0.408369	-2.38289	-1.84225	-1.77866	-1.30517	-0.0680484
YPL010W	RET3	-0.025013	0.0739378	-0.0597531	-1.4025	-0.827539	-0.467654	-2.16172	-1.91787	-1.6056	-1.83189	0.15927
YPR112C	MRD1	0.039624	0.312436	0.525792	-0.748422	-1.27645	-0.80084	-2.38471	-2.40301	-2.26286	-2.05434	-0.85133
YBR248C	HIS7	0.234147	0.286095	0.189417	-0.477295	-0.940551	-0.661056	-1.94159	-1.56021	-1.51374	-1.60173	-0.266907
YNL077W	APJ1	-0.0167481	0.186271	0.298156	-1.95644	-1.49087	-1.10111	-1.96452	-2.17649	-2.22694	-2.43584	0.218704
YPL032C	SVL3	-0.388329	-0.261931	-0.801599	-2.32163	-2.04423	-1.46691	-3.00886	-2.42308	-2.55751	-2.20092	-0.446397
YDL225W	SHS1	-0.00739751	0.104278	0.158038	-1.4827	-1.00678	-0.438207	-2.15384	-1.61082	-2.03032	-1.80656	0.0381467
YGR180C	RNR4	-0.665324	-0.678776	-0.60684	-2.08185	-2.17719	-1.64193	-1.86173	-0.866533	-0.809179	-0.896353	0.65452
YKL212W	SAC1	-0.227584	-0.0379789	-0.219161	-1.64006	-1.18499	-0.884859	-2.34954	-1.9884	-2.02385	-1.83276	-0.102638
YMR290C	HAS1	-0.167134	0.135843	0.126114	-0.555839	-1.64864	-1.11317	-2.82926	-2.43314	-2.27465	-2.05883	-0.921569
YLR256W	HAP1	-0.789092	-0.949092	-0.737103	-2.61977	-1.98326	-1.603	-1.34516	-1.02119	-1.06154	-1.1644	0.282793
YJR090C	GRR1	-0.0116438	0.0271143	0.101877	-1.76019	-1.1856	-0.720968	-1.56891	-1.71347	-1.84587	-1.60617	0.0791803
YBR048W	RPS11B	-0.110328	0.138582	0.0341851	-1.40961	-1.60346	-1.09554	-1.8503	-1.25079	-1.13473	-0.51216	-0.514756
YHR088W	RPF1	0.0636171	0.217146	0.260313	-0.672399	-1.37353	-0.653503	-2.37042	-2.41626	-2.03343	-1.90975	-0.510303
YHL036W	MUP3	-0.948491	-0.952185	-0.639856	-0.96915	-0.84036	-0.922523	-0.0826796	-0.609355	-0.196531	-0.872308	0.0884649
YIL036W	CST6	0.0151729	0.0413402	0.0462925	-1.96454	-0.958504	-0.524449	-1.88517	-1.70527	-1.80151	-1.93437	0.406617
YBL105C	PKC1	0.00609828	0.148581	0.136157	-1.65404	-0.846138	-0.500007	-1.79968	-1.76886	-1.99046	-1.77378	0.0288313
YJR044C	VPS55	-0.238052	-0.0361171	-0.185434	-2.06925	-1.14152	-0.577086	-2.35318	-2.25989	-1.99856	-2.06806	0.582378
YNL176C	TDA7	-0.897499	-0.818264	-0.806322	-1.70624	-2.36612	-1.80908	-1.591	-1.49753	-1.56574	-1.8314	0.082265
YOR158W	PET123	0.0227907	0.135285	0.106664	-1.71195	-1.2296	-0.560765	-1.99675	-1.53626	-2.12037	-1.89697	0.261259
YKL175W	ZRT3	-0.765528	-0.468874	-0.00755904	-1.86018	-1.55327	-0.986208	-1.26071	-2.14371	-2.36861	-2.16594	0.097497
YGL086W	MAD1	0.027396	0.0723599	0.29627	-1.90397	-1.14576	-0.599878	-1.83716	-1.61163	-1.98648	-1.83132	0.0208611
YER105C	NUP157	-0.15678	0.172565	0.132532	-1.70955	-1.01423	-0.553231	-2.03071	-1.84806	-1.95494	-1.82336	-0.280096
YEL022W	GEA2	-0.0638038	0.125789	0.200033	-1.80427	-1.00875	-0.477533	-1.99058	-1.74129	-1.96817	-1.58233	-0.182905
YBR017C	KAP104	-0.123886	0.129702	-0.00337707	-1.60536	-1.30733	-0.881032	-2.16956	-2.0097	-1.93371	-1.95044	-0.306477
YPR144C	NOC4	-0.0943802	0.139124	0.228975	-0.545158	-1.52586	-0.874798	-2.7314	-2.49338	-2.60775	-2.01699	-0.684424
YBR171W	SEC66	0.0912919	-0.0087891	-0.0230587	-1.76503	-1.2677	-0.937362	-2.36486	-2.10643	-1.88021	-1.9208	-0.0634222
YDL088C	ASM4	0.103183	0.172885	0.212033	-1.71106	-0.909501	-0.606287	-1.44362	-1.6912	-2.02192	-1.71241	0.0461841
YEL002C	WBP1	-0.0782133	-0.00813296	-0.0107404	-1.59021	-1.1047	-0.541836	-2.38055	-1.84528	-1.68485	-1.60321	0.198066
YHR039C-A	VMA10	-0.097772	-0.154135	0.0908729	-1.54492	-1.36137	-0.823081	-2.53955	-1.46245	-1.69988	-1.15468	-0.0895364
YNL123W	NMA111	-0.137245	0.0747351	-0.114714	-1.13612	-1.28673	-0.860589	-2.20476	-2.03637	-2.06844	-1.69421	-0.279178
YIL144W	NDC80	-0.0178041	-0.0828831	0.181632	-2.05473	-1.00291	-0.530891	-1.64125	-1.54087	-1.67955	-1.84671	0.221384
YFL034C-A	RPL22B	-0.0649034	-0.113849	-0.187209	-0.53309	-1.04205	-0.780894	-2.072	-2.44479	-2.18294	-2.19328	-0.364701
YNL177C	MRPL22	0.134283	0.214704	0.118837	-1.83337	-1.14465	-0.723337	-2.03468	-1.48882	-1.49557	-1.86696	0.128831
YLR153C	ACS2	-0.730058	-0.232776	-0.439576	-1.78228	-1.63405	-1.26002	-1.68301	-1.19634	-1.20018	-1.35167	-0.300503
YPR048W	TAH18	-0.124288	0.03047	-0.113168	-0.77949	-1.25596	-1.10534	-1.51556	-1.72606	-1.57951	-1.53596	-0.677804
YPL217C	BMS1	-0.14236	0.241205	0.197509	-1.14488	-1.29255	-0.774832	-2.63632	-2.33428	-2.55714	-2.10684	-0.742436
YLR200W	YKE2	0.117279	0.20562	0.321754	-1.09548	-1.01543	-0.631324	-2.40446	-1.59164	-2.03213	-2.11612	-0.269186
YJL076W	NET1	-0.201941	0.0867174	0.0927998	-1.84904	-1.16789	-0.670523	-2.24799	-1.98209	-2.12199	-1.7844	0.0197361
YER056C-A	RPL34A	-0.137812	-0.123266	-0.192278	-1.55335	-1.69363	-1.25369	-3.08038	-1.59878	-1.37087	-1.46195	0.035224
YLR163C	MAS1	-0.307497	-0.0809821	-0.158214	-1.25593	-1.30905	-0.873307	-1.99471	-1.75479	-1.91197	-1.81393	0.0404604
YLR022C	SDO1	0.141783	0.230071	0.272737	-1.30069	-1.08153	-0.823684	-3.05933	-3.09799	-2.74712	-2.28127	-0.713539
YER068W	MOT2	-0.189403	0.0167976	0.0249666	-1.88383	-1.16373	-0.772797	-1.93718	-1.87892	-1.89395	-2.09231	-0.0739107
YPR060C	ARO7	-0.00900025	0.213183	0.0562767	-1.23955	-1.40276	-1.04486	-2.65042	-2.3619	-2.33263	-2.43159	-0.655414
YHL020C	OPI1	-0.483194	-0.1582	0.0423368	-2.41894	-1.28655	-1.07874	-2.17964	-1.97186	-2.22168	-2.33954	-0.397782
YDL005C	MED2	-0.162817	0.0693847	0.275705	-1.87148	-0.910671	-0.395933	-2.35646	-2.00068	-2.42321	-2.04013	-0.036315
YIL105C	SLM1	-0.113343	0.0984988	0.0608093	-2.22065	-1.26601	-0.817613	-1.56659	-1.79797	-1.92246	-1.80727	0.489398
YMR010W	YMR010W	-0.245502	-0.096538	-0.170659	-1.52027	-1.01801	-0.63259	-2.30131	-2.07927	-1.84986	-1.7123	-0.034598
YAL029C	MYO4	-0.096277	0.0835077	0.0203311	-1.6553	-1.15778	-0.683774	-2.54663	-2.09072	-2.26737	-1.9338	0.0884636
YJL026W	RNR2	-0.534632	-0.583477	-0.4177	-1.83924	-1.44776	-1.11781	-1.88556	-0.990963	-1.10877	-1.09264	0.895218
YGR009C	SEC9	-0.134489	0.0955097	0.114243	-1.25329	-1.0295	-0.556908	-1.58196	-1.36493	-1.81822	-1.6502	0.41056
YMR090W	YMR090W	-0.895834	-1.18897	-1.4932	-2.89566	-2.30391	-1.82076	-0.266204	0.0255598	0.0479329	-0.654471	1.75641
YOL028C	YAP7	-0.155319	0.00680342	-0.225071	-1.20808	-1.15415	-1.14189	-1.30313	-1.48668	-1.58729	-1.71706	-0.228678
YIL076W	SEC28	-0.155448	0.0938164	-0.0064007	-1.59939	-1.29656	-0.920789	-2.24794	-1.91693	-1.40171	-1.74341	0.0625038
YBL058W	SHP1	-0.26629	0.011234	-0.237281	-1.75942	-1.32083	-0.787991	-1.80173	-1.681	-1.81476	-1.70316	0.210872
YBR047W	FMP23	-0.648437	-0.587194	-0.986779	-0.0673787	-0.973971	-1.01161	-2.76265	-2.67689	-2.40694	-2.76496	0.358683
YBR069C	TAT1	-1.80828	-1.52278	-1.51871	-3.08696	-4.6138	-3.97936	-1.29415	-0.80195	-0.804975	-1.1928	-0.716178
YOL036W	YOL036W	-0.031307	0.0422555	0.108756	-1.38395	-0.969014	-0.718651	-1.49088	-1.79899	-1.96413	-1.71381	0.0691003
YER050C	RSM18	-0.0239448	0.550049	0.198414	-1.27511	-0.846107	-0.653539	-1.86704	-2.0005	-1.68407	-2.20449	0.470686
YCR084C	TUP1	-0.319884	0.116062	0.0403037	-1.88995	-1.57757	-0.86905	-2.50902	-2.13644	-2.28941	-2.35503	-0.293063
YOL064C	MET22	0.347548	0.405509	0.117107	0.589399	0.116617	0.351058	-2.3094	-2.31393	-2.11532	-2.3409	-0.287946
YLR034C	SMF3	-0.107432	-0.250067	0.0404779	-1.3635	-1.43794	-1.11822	-1.07206	-1.07355	-0.810538	-1.17816	0.31677
YPR101W	SNT309	0.230844	0.0798459	0.164611	-1.16757	-0.812418	-0.181102	-1.29272	-1.70895	-1.11595	-1.55253	-0.0436143
YLR229C	CDC42	-0.333778	0.243222	-0.221715	-1.7876	-1.46852	-0.844352	-2.68951	-2.3215	-2.10587	-2.0955	-0.127488
YJR070C	LIA1	-0.424999	0.0900116	-0.185638	-0.97174	-1.72764	-1.46234	-2.39116	-1.94981	-1.85486	-1.71488	-0.938705
YPR168W	NUT2	0.13432	-0.0875323	0.241021	-0.942564	-0.569623	-0.378212	-2.31382	-2.18642	-2.54248	-2.0454	0.0791254
YLR287C	YLR287C	0.0481083	0.0610426	0.120129	-0.693427	-1.16789	-0.705523	-2.31553	-2.01566	-2.064	-2.09232	-0.493799
YKL032C	IXR1	-0.251814	0.3152	0.507013	-1.4633	-0.924173	-0.502786	-2.75516	-2.96333	-2.77294	-2.62885	-0.227994
YGR233C	PHO81	-0.254911	-0.0678273	-0.0768341	-3.36504	-2.60767	-2.16361	-2.29107	-2.0575	-2.24452	-2.13819	0.189405
YDR354W	TRP4	-0.328958	-0.0194358	-0.0701461	-0.12909	-0.518622	-0.423337	-2.15825	-0.815824	-0.949354	-1.10671	-0.200537
YJR004C	SAG1	-0.302491	-0.155422	-0.64768	-1.69618	-3.16841	-2.76872	-2.46542	-0.422475	-0.775712	-0.704394	-1.27397
YKR016W	MIC60	-0.108283	0.0789656	-0.0388609	-1.99815	-0.869435	-0.393358	-2.30131	-1.76634	-1.88428	-1.89076	0.524885
YGL071W	AFT1	-0.626524	-0.247042	-0.167799	-1.20762	-1.3134	-1.1076	-1.38804	-1.71273	-1.75197	-1.77663	0.0216064
YLL039C	UBI4	-0.706739	-0.859919	-1.1558	-1.80615	-1.52607	-1.40275	-0.714015	-1.02017	-1.25081	-0.970731	0.585622
YER094C	PUP3	-0.410657	0.0304753	-0.23539	-1.33331	-1.53244	-1.06982	-2.13766	-1.93964	-1.89944	-1.91573	0.359811
YDL065C	PEX19	-0.0696307	0.391963	0.270914	-1.14372	-0.632921	0.0144627	-1.85036	-1.52923	-1.70865	-1.85152	0.264663
YOR141C	ARP8	-0.0692108	0.110041	0.126579	-1.39207	-0.808577	-0.299322	-2.0471	-1.81356	-2.13206	-1.78775	-0.0144517
YLL027W	ISA1	-0.0397278	0.365007	0.0618006	-1.66132	-1.28998	-1.21899	-0.116545	-0.940067	-1.01365	-1.56106	0.298802
YER120W	SCS2	-0.495879	0.0558624	-0.193598	-1.89194	-1.67958	-1.30537	-2.44168	-1.77969	-1.79758	-1.66337	0.0905213
YOR045W	TOM6	-0.456188	0.0416803	0.20447	-1.41468	-1.0851	-0.291703	-2.65132	-2.33934	-1.33325	-2.16055	0.161567
YBR046C	ZTA1	-0.607748	-0.841912	-0.667306	-0.606786	-1.49756	-1.59838	-1.41967	-0.966783	-0.782617	-1.3247	0.871203
YKR068C	BET3	-0.12602	0.0987019	0.169585	-1.21018	-1.06751	-0.610993	-2.18613	-1.92004	-1.5796	-2.06759	0.300865
YDL155W	CLB3	-0.217714	0.0436324	0.01159	-1.75153	-1.14705	-0.730709	-2.25553	-2.09188	-2.12113	-2.16417	-0.34121
YOR116C	RPO31	-0.0370083	0.206098	0.0720005	-1.41	-1.21348	-0.810149	-2.57669	-2.27294	-2.23637	-2.12738	-0.681038
YJL166W	QCR8	0.0661132	0.143029	-0.505447	-1.29133	-0.67008	-0.401862	-2.0054	-1.59959	-1.14588	-1.4943	0.780553
YDL106C	PHO2	-0.0723553	0.234141	0.32144	-2.05674	-1.08103	-0.410561	-1.50061	-1.52207	-1.76211	-1.82511	0.113508
YER151C	UBP3	-0.244457	-0.0240076	-0.072976	-1.99967	-1.46561	-0.966411	-2.4198	-1.97047	-2.18759	-1.99643	-0.0310408
YDR525W-A	SNA2	-0.353863	-0.209944	-0.221755	-0.811255	-0.644071	-0.454055	-2.85538	-2.58704	-2.39851	-3.05311	1.15031
YBR164C	ARL1	-0.0530616	0.116407	0.102051	-1.32866	-0.672319	-0.235135	-2.11581	-1.82339	-1.8091	-1.92251	-0.0391692
YDR129C	SAC6	-0.302737	-0.180345	-0.221002	-2.21723	-1.40546	-1.01886	-2.32063	-1.75414	-1.84156	-1.80053	0.233742
YDL190C	UFD2	0.0671286	0.226794	0.0445283	-1.46651	-0.618598	-0.133877	-1.76011	-1.81515	-1.57529	-1.61177	0.327775
YDR449C	UTP6	0.195924	0.319969	0.373288	-0.7216	-1.02241	-0.664253	-1.73443	-1.78822	-1.85546	-2.02179	-0.747211
YMR091C	NPL6	-0.0382297	0.243133	0.219764	-1.53857	-0.954634	-0.490241	-2.20058	-1.7212	-1.82741	-1.98257	-0.39511
YDR356W	SPC110	-0.268351	-0.128353	0.0318018	-2.30739	-1.06904	-0.315271	-2.22469	-1.81052	-2.17903	-1.98833	-0.208389
YDR266C	HEL2	0.0289798	0.208907	0.124305	-1.5007	-1.24585	-0.72566	-2.28529	-1.94758	-1.9942	-1.94817	-0.196515
YEL055C	POL5	-0.0544811	0.194365	-0.0470845	-1.40274	-1.36319	-0.775551	-3.01931	-2.57236	-2.48307	-2.24354	-0.781749
YGL120C	PRP43	-0.161556	0.123531	0.0301759	-1.21954	-1.80904	-1.13399	-2.54785	-2.32372	-2.226	-1.8899	-0.677966
YMR014W	BUD22	-0.106699	0.345144	0.462806	-0.925533	-1.15391	-0.750103	-2.43712	-2.44465	-2.32184	-2.50279	-0.621722
YKR043C	SHB17	-0.164413	0.318268	0.104449	-0.641331	-0.968703	-0.767059	-2.40647	-1.86373	-1.62681	-1.77334	-0.282995
YDR292C	SRP101	-0.020676	0.240902	0.0469627	-1.5405	-0.806244	-0.509388	-2.31602	-2.21252	-2.24704	-2.06009	-0.356324
YDR165W	TRM82	0.0275235	0.130187	0.0675359	-0.670283	-1.2927	-1.03381	-2.7788	-2.29445	-2.2301	-2.15669	-0.994643
YLR027C	AAT2	-0.20282	0.114963	-0.167081	-1.29675	-1.63287	-1.17921	-0.810462	-1.29735	-1.1267	-1.23672	0.0842957
YDR188W	CCT6	-0.386687	0.0907364	-0.343118	-1.50492	-1.66059	-1.10956	-2.6522	-2.23193	-2.38482	-2.37109	0.070599
YLR335W	NUP2	-0.189952	0.131194	-0.0156282	-1.58808	-1.39762	-0.926383	-2.90272	-2.51333	-2.66734	-2.42402	-0.411332
YNL243W	SLA2	-0.282355	-0.14567	-0.143626	-1.41795	-1.24076	-0.746243	-2.33308	-1.99529	-1.96006	-1.90063	0.39737
YOR195W	SLK19	-0.1849	-0.00979852	0.199253	-1.66734	-1.01099	-0.415597	-1.81842	-1.64682	-1.80705	-1.7011	-0.123258
YBR198C	TAF5	-0.130197	0.239402	0.194364	-1.55864	-0.885424	-0.440066	-1.84537	-1.83644	-1.82063	-1.81789	-0.308643
YJL144W	YJL144W	-0.460317	-0.379288	-0.666084	-3.92425	-2.57105	-2.57008	-2.15712	-1.53935	-2.05683	-1.67453	2.11106
YNL267W	PIK1	-0.132334	0.0628617	0.00598206	-1.72443	-1.14185	-0.533835	-2.18973	-1.96873	-2.17213	-1.89448	0.0726908
YPR086W	SUA7	-0.0698586	0.10902	0.187555	-0.896943	-1.13209	-0.732881	-1.45135	-1.52192	-1.45177	-1.56342	-0.228215
YLL011W	SOF1	0.0587984	0.365945	0.339769	-1.024	-1.30821	-1.01458	-2.19843	-2.10943	-2.06907	-1.95819	-0.759169
YPR167C	MET16	-0.365032	-0.309063	-0.390547	1.04438	-0.340635	-0.20977	-0.147665	-1.7581	-1.21726	-1.28758	0.190149
YLR083C	EMP70	-0.258644	0.201392	-0.167736	-1.44043	-1.29484	-0.904581	-2.46236	-2.32843	-2.11761	-1.99543	-0.655197
YNL169C	PSD1	-0.62851	-0.596917	-0.232656	-4.20578	-2.80534	-2.07285	-1.57602	-2.12314	-1.84535	-1.89069	-0.310703
YPL129W	TAF14	-0.00176674	0.208099	0.302695	-1.35889	-0.939827	-0.463918	-1.92112	-1.68134	-1.69393	-1.67931	-0.192115
YGR089W	NNF2	-0.00549174	0.0986666	0.202907	-1.85232	-0.898312	-0.447224	-1.58241	-1.60374	-1.90547	-1.78574	0.0876367
YOR281C	PLP2	-0.222918	0.104373	0.035037	-1.39841	-1.3153	-0.694358	-2.50753	-2.35888	-2.46379	-2.29775	-0.00155756
YOL061W	PRS5	-0.105527	0.0903184	0.0380564	-1.28118	-1.30211	-0.909719	-2.66601	-2.14139	-2.12701	-2.1984	-0.405672
YGR026W	YGR026W	-0.246172	-0.0802397	-0.234879	-2.1467	-1.45314	-0.85901	-2.39519	-2.1034	-2.0079	-2.10629	0.345227
YMR197C	VTI1	0.0343625	0.0994226	0.18226	-1.84085	-0.77858	-0.282626	-1.74576	-1.62483	-1.92476	-1.56945	0.649861
YGR061C	ADE6	-0.355477	-0.202077	-0.372079	-1.18273	-1.28572	-1.00357	-2.47545	-2.19415	-2.12154	-1.67439	-0.773599
YOR061W	CKA2	-0.0918036	0.160609	-0.0937306	-1.27388	-1.18631	-0.95302	-2.47323	-1.93302	-2.13265	-1.97085	-0.15217
YML018C	YML018C	-0.223522	0.00867713	-0.303256	-0.355845	-1.03029	-0.934125	-2.05369	-2.77186	-2.24377	-2.27057	-0.943465
YNR061C	YNR061C	-0.26509	-0.0452734	-0.211302	-1.50867	-1.45598	-1.19164	-2.69952	-2.4452	-2.05582	-2.09646	-0.367673
YLR436C	ECM30	-0.273385	-0.039097	-0.196178	-2.3602	-1.13331	-0.668247	-2.42373	-2.27894	-2.46528	-2.36234	0.325929
YDR186C	YDR186C	-0.10368	0.0795532	0.012489	-1.0964	-0.873404	-0.467793	-1.58874	-1.42468	-1.58549	-1.45843	0.398751
YNL059C	ARP5	-0.0982468	0.0760748	0.207019	-1.5882	-0.924307	-0.325575	-2.01919	-1.62445	-1.84214	-1.70556	-0.167756
YGL115W	SNF4	-0.357195	0.176978	0.0856312	-2.12099	-1.47146	-1.25415	-2.11801	-1.62002	-1.45351	-1.55246	-0.233191
YCL035C	GRX1	-0.252511	0.123808	0.117349	-1.91715	-1.41465	-0.443405	-1.63261	-1.55815	-1.03951	-1.26564	1.49214
YNL103W	MET4	-0.173728	0.10444	0.283874	-0.890687	-0.850791	-0.551109	-1.94549	-2.08943	-2.27554	-1.92678	0.142459
YBR247C	ENP1	-0.0777685	0.373529	0.279487	-0.760369	-1.30977	-0.826273	-2.9542	-2.4717	-2.53793	-2.42261	-0.976647
YDL224C	WHI4	-0.0963774	0.129302	-0.0211009	-1.87766	-1.14789	-0.64851	-1.60668	-1.74455	-1.71614	-1.63595	0.264337
YPL009C	RQC2	-0.108738	0.112103	0.0108206	-1.76654	-1.18304	-0.57191	-2.31838	-1.96727	-2.18588	-1.97429	-0.126022
YNL032W	SIW14	0.0663307	0.0838986	0.0615727	-1.22483	-0.931165	-0.464108	-2.6945	-2.45177	-2.25016	-1.92185	-0.164413
YDR101C	ARX1	-0.163006	0.30793	0.14546	-0.719431	-1.66081	-1.30306	-2.55509	-2.49971	-2.22032	-1.95362	-1.0611
YER019C-A	SBH2	-0.344211	0.185038	0.117488	-1.31809	-1.35464	-0.732915	-2.15791	-1.96412	-1.8905	-1.99575	0.143662
YLR384C	IKI3	-0.0372432	0.288916	0.134961	-1.49314	-1.17489	-0.671697	-2.18757	-1.98933	-2.13893	-1.76297	-0.386869
YJR005W	APL1	0.0346551	0.142246	0.133942	-1.49935	-0.903444	-0.546142	-1.60498	-1.51014	-1.61942	-1.51255	0.0370479
YOR147W	MDM32	0.147785	0.223793	0.129025	-1.64711	-0.74546	-0.357651	-1.75512	-1.72655	-1.76057	-1.65794	0.214188
YPR113W	PIS1	-0.372993	-0.314387	-0.351011	-1.92247	-1.53919	-0.991584	-1.77843	-1.35723	-0.962655	-1.13612	-0.0396165
YAR002C-A	ERP1	-0.420402	0.144417	-0.195191	-1.64872	-0.990382	-0.606184	-2.21769	-1.8699	-1.75481	-1.72432	-0.120742
YIL052C	RPL34B	-0.285958	0.027217	-0.166531	-0.832981	-1.52376	-1.19631	-2.59643	-1.51159	-1.37198	-1.3007	-0.455722
YOR098C	NUP1	-0.0860681	0.214646	0.135335	-1.401	-1.38628	-0.847089	-2.1148	-1.93522	-1.90533	-1.89777	-0.368989
YGL080W	MPC1	0.0626613	0.200313	0.144227	-1.1436	-0.79931	-0.408507	-2.17031	-2.46059	-1.89227	-2.88337	0.221339
YLL010C	PSR1	-0.348015	0.0880377	0.114762	-1.59311	-1.26051	-0.705767	-2.05627	-1.79816	-2.03496	-1.87346	-0.10849
YER048C	CAJ1	-0.215884	0.117296	-0.0886201	-2.02485	-1.36472	-0.816637	-2.75495	-2.09125	-2.38886	-1.91513	0.144486
YDR257C	RKM4	0.205254	0.166334	0.308759	-1.21256	-0.890631	-0.577015	-2.55286	-2.21343	-2.40457	-2.0754	0.0217705
YGR078C	PAC10	-0.334511	0.00167033	-0.0583351	-1.15408	-1.35093	-1.123	-2.45545	-1.82697	-2.02864	-1.84849	-0.513611
YHR108W	GGA2	-0.206743	0.0141377	-0.102638	-1.88304	-1.52711	-0.972306	-2.1933	-2.00929	-2.12905	-1.85846	-0.278201
YCR077C	PAT1	-0.171099	0.0733046	-0.0354272	-1.64127	-1.29801	-0.808049	-2.13619	-1.82241	-2.1507	-1.91786	-0.325205
YEL063C	CAN1	-0.0435651	0.323289	0.14842	-1.01921	-1.00573	-0.805725	-0.929072	-1.81969	-1.56425	-1.65155	0.00593005
YML004C	GLO1	0.0779593	-0.00100016	-0.205685	-1.60117	-0.923288	-0.502569	-1.90906	-2.49527	-2.1415	-1.63787	0.899709
YPR163C	TIF3	0.0301605	0.185008	0.0314394	-1.20005	-1.64413	-1.08056	-2.28728	-1.74763	-1.93326	-1.74727	-0.728348
YGR134W	CAF130	-0.25556	-0.219314	-0.0615942	-1.39475	-1.23455	-0.916984	-1.15912	-1.41156	-1.3722	-1.5561	-0.0439191
YJR060W	CBF1	-0.338371	0.0620496	0.0859564	-2.39169	-1.83711	-1.28308	-2.55878	-2.28723	-2.61743	-2.20319	-0.0805981
YBL039C	URA7	-0.247668	0.107886	-0.154132	-0.777979	-1.76379	-1.25594	-2.88557	-2.46208	-2.36685	-2.05595	0.321343
YNL155W	CUZ1	-0.130267	-0.355158	-0.548667	-2.14991	-1.75488	-1.40854	-1.93426	-2.41013	-2.23027	-2.27702	0.329805
YHL003C	LAG1	-0.21546	-0.031254	-0.278821	-1.78293	-1.35103	-1.10645	-2.63938	-2.32016	-2.01239	-2.22504	-0.20326
YIL021W	RPB3	-0.210468	0.177288	0.00878925	-1.69627	-1.64391	-1.06862	-2.24002	-1.97329	-2.00834	-1.93172	-0.192314
YFR039C	OSW7	-0.311229	-0.250501	-0.161611	-1.538	-1.07067	-0.700529	-2.4596	-2.31212	-2.1724	-2.1787	0.0517805
YKL088W	CAB3	-0.0136461	0.0890567	0.172015	-1.68372	-1.09744	-0.518771	-2.0174	-1.71247	-1.87223	-1.75557	-0.0575761
YDL058W	USO1	0.0246204	0.246097	0.281627	-1.55312	-0.768188	-0.2731	-2.21013	-1.98588	-2.47977	-2.00082	-0.0625688
YJL154C	VPS35	-0.182248	-0.0646445	-0.125295	-1.8056	-1.18303	-0.853878	-2.08726	-2.13849	-2.21237	-1.82618	0.272762
YGR186W	TFG1	-0.160879	0.125878	0.213727	-1.48114	-1.31599	-0.623035	-2.00067	-1.72273	-1.85811	-1.76818	0.140463
YJL041W	NSP1	-0.196828	0.18399	0.0599416	-1.77164	-1.21642	-0.765797	-2.38925	-1.91607	-2.34761	-2.00975	0.0474086
YKR082W	NUP133	-0.130322	-0.0411618	-0.14734	-1.4727	-1.39091	-0.975981	-2.06404	-1.84339	-1.88033	-1.69988	-0.307699
YDR176W	NGG1	-0.0773614	0.114644	0.174342	-1.94926	-1.06799	-0.474191	-2.34366	-2.05765	-2.43546	-2.12733	-0.121514
YCR008W	SAT4	-0.350259	0.122596	-0.210657	-1.60524	-1.57032	-0.917222	-2.23082	-1.96468	-2.00185	-2.10151	-0.23817
YOR327C	SNC2	-0.830994	-0.806944	-0.60893	-1.52418	-2.48321	-1.47097	-3.07645	-2.99749	-2.30483	-2.73704	0.300566
YCR106W	RDS1	-0.351879	-0.177366	-0.245279	-2.24754	-0.903402	-0.658621	-2.11703	-2.24578	-2.09259	-2.16153	-0.186732
YMR054W	STV1	-0.239021	0.00726688	-0.0506852	-1.68407	-1.19213	-0.713346	-2.66191	-2.23761	-2.25236	-2.07265	0.144437
YOR342C	YOR342C	-0.909071	-0.291766	-0.301176	-1.8315	-2.68763	-2.06819	-2.87818	-2.38083	-2.58409	-2.22011	-0.366371
YLR190W	MMR1	-0.552811	-0.102269	-0.252886	-2.12756	-1.48029	-0.872087	-2.84807	-2.00179	-2.29272	-2.19348	0.182915
YHR065C	RRP3	-0.1094	0.126908	0.139412	-1.25968	-1.46489	-0.72079	-2.40362	-2.06956	-1.87262	-1.98441	-0.344704
YAR002W	NUP60	-0.105196	0.0286068	0.069397	-1.51141	-1.1653	-0.996621	-2.11624	-2.06996	-2.11121	-2.0813	-0.0385211
YLR008C	PAM18	0.0310976	0.179504	-0.240905	-1.13581	-1.50418	-1.1984	-2.41937	-2.22123	-2.02325	-2.20542	-0.570455
YJL171C	YJL171C	-0.320598	-0.298115	-0.122333	-2.06093	-1.28551	-0.963987	-0.837546	-1.35211	-0.911459	-1.08777	0.986563
YDR351W	SBE2	0.061159	-0.0119698	0.134031	-1.22672	-1.14847	-0.79174	-1.39115	-1.76786	-1.93919	-1.52148	0.183548
YPL228W	CET1	-0.0395044	0.167827	0.203486	-1.9765	-0.985876	-0.557826	-2.13152	-1.93719	-2.02462	-2.13447	0.0369041
YGR145W	ENP2	-0.109537	0.367836	0.487833	-0.965952	-1.4749	-0.921813	-3.03022	-2.71846	-2.65397	-2.23967	-0.970742
YMR062C	ARG7	0.541591	0.674315	0.345371	0.158428	0.0262581	0.0144168	-1.17609	-0.816855	-0.427845	-1.00627	0.580019
YDR003W	RCR2	-0.635657	-0.272908	-0.266314	-1.44093	-1.6679	-1.5884	-1.56332	-1.81979	-1.44524	-1.9898	0.60124
YDR519W	FPR2	-0.184839	-0.0425829	-0.0597719	-1.04903	-0.742773	-0.488936	-3.14889	-2.67272	-2.32451	-2.07623	0.362681
YHR099W	TRA1	-0.147319	0.137407	0.0977661	-1.67667	-1.1	-0.639274	-1.99051	-1.74093	-1.90767	-1.56784	-0.255544
YKL065C	YET1	-0.0995367	-0.110764	-0.313106	-1.79261	-1.27068	-0.963596	-2.14948	-1.90926	-2.02065	-1.86302	1.19888
YKL094W	YJU3	-0.0641611	0.113613	-0.133203	-1.66079	-1.41709	-0.92857	-2.23283	-2.2513	-2.0287	-1.94423	0.554004
YGR033C	TIM21	-0.100302	0.152854	0.0197065	-1.22718	-1.28176	-0.809405	-2.40515	-2.41968	-2.4861	-2.12026	-0.215259
YMR100W	MUB1	0.00441075	0.0325794	-0.143566	-1.39885	-0.98802	-0.649946	-1.55607	-1.9713	-1.99218	-1.65446	-0.0767006
YHR199C	AIM46	-0.911408	-0.380729	-0.668827	-1.06483	-1.60935	-1.261	-0.702849	-1.10427	-0.574275	-0.971053	0.222146
YKL020C	SPT23	-0.0526495	0.157125	0.12968	-1.71773	-0.967171	-0.48215	-1.61283	-1.72053	-1.84277	-1.69361	0.181433
YIL022W	TIM44	-0.0818429	0.251011	-0.0236629	-1.29486	-1.32827	-0.852495	-2.06746	-2.00841	-1.89496	-2.10621	-0.301956
YJL143W	TIM17	-0.137633	0.213367	0.0932097	-1.22072	-0.749922	-0.210646	-2.30921	-2.30653	-1.84353	-1.76707	0.122771
YLR409C	UTP21	-0.0563124	0.168991	-0.0193452	-1.43656	-1.61874	-1.11745	-2.53782	-2.22026	-2.2686	-1.93882	-0.896949
YJL117W	PHO86	-0.0293855	-0.0638191	-0.0107581	-1.90961	-1.47006	-1.27509	-2.49921	-1.85052	-1.86305	-1.90477	-0.179439
YPL094C	SEC62	-0.279241	-0.0207292	-0.0233813	-1.16115	-1.34979	-0.808054	-2.56899	-2.2261	-1.78003	-1.68462	-0.126975
YGL014W	PUF4	-0.109341	0.122713	0.0385876	-1.50973	-1.21957	-0.638384	-2.14344	-1.82082	-1.9594	-1.86634	-0.506541
YHR111W	UBA4	-0.244226	-0.15066	0.0163493	-1.17256	-1.06885	-0.764841	-2.7489	-2.32118	-2.44534	-2.11463	-0.0522589
YGR040W	KSS1	-0.569011	-0.238152	-0.535518	-1.485	-1.92112	-1.56634	-1.81444	-1.02413	-1.1394	-1.36648	-0.120784
YIL115C	NUP159	-0.0230562	0.182943	0.147714	-1.76588	-1.07162	-0.612134	-1.90274	-1.87935	-2.1025	-1.70879	0.133838
YPL013C	MRPS16	-0.220506	0.0227382	-0.192539	-1.65434	-1.36727	-0.730788	-2.40247	-2.53516	-1.44061	-2.01896	0.14711
YJL050W	MTR4	-0.0806866	0.197616	0.126072	-1.0128	-1.52425	-0.944572	-2.64739	-2.29522	-2.19431	-1.78671	-1.08486
YLR395C	COX8	-0.311785	0.131894	-0.24614	-1.95625	-1.43057	-0.723885	-2.32878	-2.23516	-1.72069	-1.83497	0.658794
YJL145W	SFH5	-0.208987	-0.478187	-0.240295	-1.15765	-1.46387	-1.11909	-3.25022	-2.57249	-2.76905	-2.17577	-0.338639
YLR056W	ERG3	-1.57729	-1.15173	-1.66955	-1.64109	-2.07777	-1.48633	-1.28023	-0.928058	-0.751343	-1.1362	-0.0309967
YJR016C	ILV3	-0.289419	0.174699	-0.338577	-0.947059	-1.60416	-1.24868	-1.29091	-0.942622	-0.970682	-0.691205	-0.466973
YNL149C	PGA2	-0.436351	-0.106314	0.00822303	-1.35349	-1.53825	-0.739816	-2.50672	-2.1106	-2.09631	-1.52166	-0.29106
YGR198W	YPP1	-0.278601	-0.295007	-0.195116	-1.40695	-1.21358	-0.868076	-2.29432	-2.27667	-2.34677	-2.32757	-0.213863
YLR295C	ATP14	-0.123372	0.187173	-0.171359	-1.27997	-1.30545	-0.710094	-2.06781	-1.45302	-1.6049	-2.04707	0.836621
YOR207C	RET1	-0.00471284	0.207906	0.258422	-1.21109	-1.21102	-0.730469	-2.18341	-2.08074	-2.00351	-1.71327	-0.406619
YJL212C	OPT1	-0.868235	-0.584628	-0.705642	-1.02453	-2.59728	-2.07693	-1.04461	-1.0442	-0.844491	-1.29197	-0.571552
YPL259C	APM1	-0.100443	0.0323642	-0.00726276	-2.00227	-1.24756	-0.817158	-1.7749	-1.75719	-2.06707	-2.03353	-0.0285951
YDR083W	RRP8	0.147751	0.404671	0.47308	-0.976438	-0.979829	-0.425139	-2.77083	-2.39881	-2.32807	-2.20954	-0.862944
YLR058C	SHM2	-0.724906	-0.57011	-0.883632	-1.36022	-1.23065	-1.01882	-1.4105	-1.83723	-1.67501	-1.70568	-0.487471
YKL205W	LOS1	0.120578	0.0807644	0.143536	-1.33314	-1.21344	-0.970028	-1.67764	-1.67322	-1.9291	-1.68338	-0.42683
YLR398C	SKI2	0.0116101	0.21915	0.113552	-1.38008	-0.794164	-0.368127	-1.84832	-1.95063	-2.006	-1.78598	0.0106024
YPR159W	KRE6	-0.611178	-0.237422	-0.330368	-1.11975	-1.82476	-1.28523	-2.37427	-1.96986	-1.82856	-1.77091	0.661017
YLR359W	ADE13	-0.14342	0.0350566	-0.211295	-1.62262	-1.21651	-0.79563	-2.39582	-1.9135	-1.85631	-1.68483	-0.436839
YLR344W	RPL26A	-0.204107	0.0977338	-0.329067	-1.24987	-1.50788	-1.20009	-2.70643	-1.98462	-1.64859	-1.50656	-0.441685
YJR046W	TAH11	-0.181747	0.127276	-0.0920739	-1.67273	-1.48384	-1.17023	-3.46805	-3.07637	-2.97165	-2.90368	0.0671858
YCR057C	PWP2	-0.243615	0.197868	0.0878393	-0.757447	-1.59665	-1.13231	-2.48675	-2.1576	-2.266	-2.02488	-1.05923
YGL150C	INO80	-0.106462	0.186607	-0.039163	-1.83152	-1.21895	-0.618789	-2.98364	-2.57718	-2.66978	-2.4679	-0.0355311
YBL036C	YBL036C	0.149351	0.238881	0.164184	-1.2684	-0.888675	-0.524179	-2.4954	-2.05591	-1.60576	-1.60902	-0.0160292
YMR243C	ZRC1	-0.429817	-0.0336602	-0.352951	-1.10111	-1.48817	-1.02426	-2.64629	-2.82048	-2.52871	-2.44741	-0.583847
YHR103W	SBE22	-0.244037	-0.00654247	-0.260085	-2.12892	-1.51841	-1.06092	-2.32839	-1.77911	-2.01899	-1.78402	-0.123069
YIL070C	MAM33	-0.0230794	0.163148	0.0262662	-1.51628	-1.26225	-0.581659	-1.85572	-1.74024	-1.66095	-2.02165	0.540745
YDR452W	PPN1	-0.203162	0.0414425	0.00205094	-2.18416	-0.943123	-0.363089	-2.72759	-1.973	-2.01345	-1.97121	0.550019
YDL047W	SIT4	-0.369466	0.0750122	-0.136128	-1.61187	-1.66245	-1.28184	-2.59261	-2.59216	-2.3656	-2.28788	-0.126858
YDL040C	NAT1	-0.00372183	0.136793	0.00661983	-1.5393	-0.927682	-0.530944	-2.55348	-2.17889	-2.24467	-1.86331	-0.34773
YMR089C	YTA12	-0.0762068	0.201975	0.10887	-1.71814	-1.00727	-0.470507	-2.35576	-2.10437	-2.30008	-2.06483	0.351559
YDR055W	PST1	-1.60693	-0.945275	-1.08583	-2.95673	-2.91542	-2.65616	-0.0603343	-0.144256	-0.172639	-0.548156	1.81935
YOL006C	TOP1	-0.153962	-0.0502095	-0.0558706	-1.67365	-1.6399	-1.0177	-2.78042	-2.66999	-2.49168	-2.2671	0.0771459
YGR193C	PDX1	-0.165521	0.000842861	0.00283713	-1.6307	-1.24341	-0.935345	-2.2775	-2.08664	-2.18728	-2.11185	0.195528
YBR059C	AKL1	-0.28557	-0.0753572	-0.0836308	-2.21822	-0.873017	-0.529615	-2.21303	-1.99306	-2.23196	-2.06626	0.487875
YNR043W	MVD1	-0.191017	0.17871	-0.0636501	-1.08977	-0.563584	-0.0136348	-1.64154	-1.19689	-1.40527	-1.28796	-0.33427
YJR010W	MET3	-0.525085	-0.325997	-1.22459	1.93187	-0.366217	-0.326114	0.0133858	-1.89953	-1.44228	-2.30055	0.438463
YPL028W	ERG10	-0.118237	0.0700713	-0.378356	-0.980349	-0.420248	-0.0751611	-2.13607	-1.82811	-1.63836	-1.63384	-0.23364
YJR041C	URB2	0.00249802	0.160191	0.264286	-1.25566	-1.09122	-0.551718	-2.02884	-2.10349	-2.27168	-1.89063	-0.694633
YDR385W	EFT2	-0.501706	-0.16663	-0.288902	-1.43743	-1.83107	-1.18952	-2.25289	-1.36551	-1.61172	-1.12639	-0.00593331
YOR304W	ISW2	0.0175691	0.200765	0.173937	-1.46323	-0.877027	-0.518427	-3.2279	-2.27542	-2.50142	-2.05587	-0.0344589
YDR045C	RPC11	0.0814409	0.329063	0.187229	-0.6329	-1.06097	-0.598379	-2.78608	-2.3938	-2.10747	-2.30247	-0.366628
YOR216C	RUD3	-0.0233004	0.0653684	0.118152	-1.71758	-0.988869	-0.471309	-2.24893	-1.77273	-1.88636	-1.76989	-0.260374
YDR472W	TRS31	-0.209201	-0.333918	-0.520901	-1.91186	-1.6716	-0.999598	-2.27699	-1.71539	-1.44101	-2.18742	-0.503657
YJL004C	SYS1	0.0981353	0.322855	0.158166	-1.31527	-0.703754	-0.523136	-2.17659	-2.24851	-1.50536	-1.81297	-0.241422
YDR463W	STP1	0.167951	0.212833	0.124475	-1.49012	-0.651327	-0.31987	-1.73254	-1.96575	-2.35526	-1.8351	0.244055
YDL111C	RRP42	-0.220332	0.130805	-0.164982	-1.35711	-1.15852	-0.824308	-2.47343	-2.43009	-2.13736	-2.35536	-0.35495
YKL068W	NUP100	-0.132341	0.114578	0.0742091	-0.70755	-1.14372	-0.799409	-2.19975	-2.13032	-2.27124	-1.84422	-0.362388
YGR178C	PBP1	-0.217694	-0.0116622	-0.10688	-1.57702	-1.33276	-0.814465	-2.43322	-2.13842	-2.19688	-1.9261	0.136049
YPL137C	GIP3	-0.677591	-0.295393	-0.477508	-1.18926	-1.94175	-1.56658	-1.71066	-1.81964	-1.73382	-2.12447	-0.0218622
YOR222W	ODC2	0.0234888	0.0974234	0.226309	-1.2567	-1.92638	-1.33892	-1.71023	-1.23606	-1.19576	-1.41099	-0.49675
YGR060W	ERG25	-0.829839	-1.0964	-0.890326	-1.89379	-0.833796	-0.45954	-1.62493	-1.21421	-0.876118	-1.20347	0.214921
YOR107W	RGS2	-0.991532	-0.979879	-0.962793	-2.57137	-2.38783	-2.60014	-0.0975288	-0.617158	-0.388649	-0.725613	-0.224875
YAR014C	BUD14	-0.178044	0.126978	0.0214412	-1.28089	-0.942889	-0.468659	-2.35106	-2.19305	-2.46364	-2.0855	-0.267189
YDR320C-A	DAD4	-0.25803	-0.116917	0.0350175	-0.604088	-1.16878	-1.01824	-2.92451	-1.92009	-2.25825	-2.14098	0.172543
YFR037C	RSC8	-0.109247	0.202255	0.188183	-1.70171	-1.35262	-0.756616	-2.48712	-1.74631	-2.07232	-2.18351	-0.137242
YBR088C	POL30	-1.01537	-0.91878	-0.822889	-2.10319	-1.78724	-1.53755	-1.10764	-1.02517	-0.552863	-1.30245	-0.24696
YHR206W	SKN7	-0.156835	0.243906	0.153754	-1.47452	-1.17241	-0.774509	-2.27473	-2.36196	-2.39372	-2.0916	-0.508632
YDR068W	DOS2	0.0985901	0.261126	0.225649	-1.48126	-0.658962	-0.120814	-2.46789	-1.97169	-2.0117	-1.93842	0.0495383
YCL059C	KRR1	0.00391976	0.164662	0.121634	-1.01785	-1.40731	-0.896907	-2.96421	-2.31933	-2.25	-2.36481	-0.811459
YOR305W	RRG7	0.0618665	0.165111	0.0737205	-1.20437	-1.03788	-0.493006	-1.98312	-1.46072	-1.43501	-1.53382	0.25944
YJL128C	PBS2	-0.0940831	0.0833233	0.0555241	-1.75158	-1.2011	-0.917127	-2.36268	-2.3215	-2.47879	-2.43392	0.219843
YHR148W	IMP3	0.220397	0.332778	0.329295	-0.722762	-0.814261	-0.510992	-2.14939	-2.37903	-2.05341	-2.10918	-0.658372
YAL007C	ERP2	-0.0875403	0.00792727	-0.279839	-1.70155	-1.00497	-0.782974	-2.25111	-2.03193	-1.97292	-1.49173	0.141589
YGL184C	STR3	-1.3999	-1.16191	-0.61944	0.265313	-1.56441	-1.75411	0.327639	-0.525508	-0.296593	-0.911171	0.12057
YHR104W	GRE3	-0.723537	-0.212532	-0.745897	-2.91014	-1.81808	-1.48617	-1.85417	-1.25416	-1.40458	-1.6861	1.62875
YLR418C	CDC73	-0.018296	-0.0164123	0.0125514	-1.46089	-1.15133	-0.645551	-2.29665	-2.21748	-2.32798	-2.06829	0.0221776
YNL258C	DSL1	0.0411796	0.175506	0.103228	-1.75646	-0.906405	-0.551924	-2.29147	-1.98064	-2.17919	-1.94598	-0.205082
YPR089W	YPR089W	-0.163999	0.151074	0.156194	-1.6521	-0.921763	-0.377627	-2.09478	-1.77894	-1.92106	-1.92499	-0.247407
YLL013C	PUF3	-0.0799349	0.15558	0.059639	-1.64118	-1.25711	-0.601284	-2.10352	-2.17153	-2.28245	-1.94183	-0.0608456
YOL051W	GAL11	-0.145696	0.118233	0.0963468	-1.48633	-1.11741	-0.630297	-2.18122	-2.09249	-2.36463	-2.06562	-0.0832767
YMR047C	NUP116	-0.112101	0.120893	0.0482299	-1.65995	-1.18223	-0.727474	-1.87931	-1.77926	-1.93272	-1.70168	-0.125258
YDR298C	ATP5	-0.240186	-0.0469513	-0.358191	-1.46041	-0.8356	-0.623918	-2.00878	-1.93359	-1.56975	-1.61225	0.690699
YOL098C	YOL098C	-0.036654	0.174781	-0.0402319	-1.7206	-1.1404	-0.624185	-2.43623	-2.16713	-2.30997	-2.09271	-0.32801
YAL041W	CDC24	-0.0979515	0.0792814	0.0659218	-1.55483	-1.06806	-0.679951	-2.04435	-1.81174	-2.09966	-1.91689	-0.0303899
YOR243C	PUS7	0.138673	0.338974	0.288253	-1.04835	-1.06002	-0.531218	-2.56775	-2.05501	-2.22039	-1.98189	-0.816574
YGR195W	SKI6	-0.203069	0.136669	0.145876	-1.25346	-1.08134	-0.772594	-2.7019	-1.95932	-1.92076	-1.97466	-0.284013
YHL007C	STE20	-0.516401	-0.111177	-0.241612	-1.4709	-1.76705	-1.27029	-2.33367	-2.22031	-2.3438	-2.08088	-0.309463
YLR248W	RCK2	-0.197061	0.0437286	-0.177687	-1.58389	-1.27192	-0.834641	-2.59833	-2.4697	-2.51863	-2.17696	0.672015
YKL101W	HSL1	-0.78401	-0.421425	-0.473231	-2.22603	-1.85623	-1.16867	-1.61468	-1.37227	-1.40257	-1.31625	0.459301
YOL126C	MDH2	-0.449211	-0.510989	-0.475562	-2.78811	-2.21795	-1.83696	-0.947879	-0.6954	-0.814213	-1.01794	0.20399
YBR256C	RIB5	-0.0355142	-0.0958436	-0.0737175	0.151869	-0.667628	-0.9238	-1.39325	-0.92951	-0.633458	-1.17724	0.524127
YGR280C	PXR1	-0.109754	0.3594	0.419067	-0.994117	-1.60004	-0.821615	-2.90267	-2.40617	-2.80506	-2.48797	-0.717452
YFL008W	SMC1	-0.241737	0.0775996	0.0694862	-2.05538	-1.35663	-0.682409	-2.2059	-1.98811	-2.26482	-2.15633	-0.0540894
YBL026W	LSM2	-0.0478842	-0.184447	0.0371452	-1.34909	-1.19897	-0.628795	-2.53967	-1.87514	-1.97677	-2.34386	-0.254084
YPL271W	ATP15	-0.110612	-0.0852698	-0.248968	-1.49921	-0.372267	-0.161626	-2.68471	-1.6503	-1.87969	-2.17136	0.845013
YLR314C	CDC3	-0.0410909	0.0376358	-0.011564	-1.70342	-1.26667	-0.673249	-2.21714	-1.8114	-2.08315	-1.90122	0.271071
YOL119C	MCH4	-0.252685	-0.041899	-0.373457	-0.32509	-0.521981	-0.604602	-0.641986	-0.547105	-0.0808111	-0.896543	0.545191
YMR319C	FET4	-1.45903	-1.10646	-0.717254	-1.77211	-2.96992	-2.27698	-2.52308	-1.46913	-1.09329	-1.26389	-0.908799
YLR224W	YLR224W	-0.230041	0.2001	-0.000891805	-1.49137	-0.854134	-0.722196	-2.38939	-2.23898	-2.27539	-2.23678	0.176391
YNL138W	SRV2	-0.260925	0.0281473	-0.161259	-2.16661	-1.20116	-0.846512	-2.02266	-1.70508	-1.57064	-1.53597	0.263443
YLR410W	VIP1	-0.0371889	0.234541	0.0666724	-1.72567	-1.33879	-0.801563	-1.75014	-1.78518	-1.76263	-1.35333	0.0146791
YDR227W	SIR4	-0.205162	-0.0653287	0.0500368	-1.77795	-1.03296	-0.535251	-2.39097	-2.34415	-2.42182	-2.16977	0.0770849
YGL101W	YGL101W	0.101811	0.149384	-0.0920863	-1.89462	-1.13899	-0.454187	-1.90356	-1.62275	-1.26568	-1.74457	-0.781555
YBR249C	ARO4	0.196978	0.509574	0.351168	0.0225497	-1.12049	-0.962305	-1.6716	-0.995885	-0.857716	-0.972448	-0.3707
YNR067C	DSE4	-1.45636	-1.25539	-1.00821	-3.75518	-3.47733	-2.77273	-0.758777	-0.157262	-0.326661	-0.262051	-0.068056
YNL001W	DOM34	-0.0991162	-0.0100044	0.0152831	-1.10005	-1.44241	-0.883951	-2.50669	-2.25897	-2.10325	-2.15977	-0.473115
YDR006C	SOK1	-0.320348	-0.142977	-0.0237757	-0.991601	-1.33261	-0.938609	-2.0589	-2.31702	-2.32125	-2.27206	0.161189
YBR287W	YBR287W	-0.305031	-0.333951	-0.325057	-2.33406	-1.69375	-1.37493	-1.64073	-1.88291	-1.69189	-1.64212	0.683426
YNL004W	HRB1	-0.0929342	0.130248	0.104777	-0.998826	-0.993425	-0.381218	-2.30302	-1.89108	-2.10246	-2.10649	-0.0929343
YKL190W	CNB1	-0.157473	-0.0174193	0.00945891	-1.83125	-1.11754	-0.876887	-2.3377	-1.97981	-1.73038	-2.12193	0.401025
YOR162C	YRR1	-0.381982	-0.418743	-0.48655	-1.4639	-1.23063	-0.79478	-2.03546	-2.06485	-2.13679	-1.95163	0.0421647
YOR212W	STE4	-0.622781	-0.0511092	-0.190113	-1.50357	-1.99498	-1.53071	-2.65777	-2.50503	-2.23109	-2.13787	-0.576093
YGR191W	HIP1	-0.257831	-0.0259963	-0.20976	-0.639066	-1.40174	-1.04892	-2.75212	-2.5487	-2.40618	-2.45073	-0.324859
YER008C	SEC3	-0.191886	0.132842	0.138877	-1.93133	-0.972111	-0.411194	-2.46365	-2.03237	-2.1747	-2.18453	-0.0449112
YKL058W	TOA2	-0.378669	0.257998	0.0835038	-1.17525	-0.655929	-0.355645	-2.52453	-2.36418	-1.58966	-2.09183	-0.154668
YGL246C	RAI1	0.0328189	0.0140519	0.0670561	-1.05867	-1.32552	-0.780679	-2.51925	-2.06588	-1.94855	-2.01106	-0.404104
YNL132W	KRE33	-0.0988386	0.216877	0.203717	-1.19729	-1.40823	-0.980646	-2.63761	-2.12626	-2.13212	-1.87827	-1.14792
YOR244W	ESA1	0.06844	0.104972	0.27679	-1.48701	-0.782241	-0.241377	-1.65783	-1.69485	-1.731	-1.6148	0.017195
YDR507C	GIN4	-0.640758	-0.234403	-0.196237	-1.41677	-1.19995	-0.469493	-2.50442	-1.92353	-1.99518	-1.78297	-0.121815
YKL061W	BLI1	0.155442	0.336337	0.523204	-1.14803	-0.523687	-0.148047	-4.13155	-2.21953	-2.0423	-2.05505	0.53887
YJR003C	YJR003C	0.125916	0.248555	0.391174	-1.53949	-1.12945	-0.686846	-1.69559	-1.06091	-1.20598	-0.990672	-0.573253
YNL263C	YIF1	-0.326997	0.0707391	0.0273651	-1.94237	-1.29715	-0.7142	-2.21607	-2.00954	-2.29855	-1.98315	0.0821868
YNL192W	CHS1	-0.590713	-0.337587	-0.119118	-1.71452	-1.93543	-1.62815	-0.965367	-0.737762	-0.807103	-0.873759	0.708591
YJL036W	SNX4	0.0437618	0.13433	-0.15485	-1.94485	-0.906992	-0.445448	-2.07298	-2.22305	-2.21372	-2.19328	0.521965
YOL012C	HTZ1	-0.464424	-0.0941075	-0.276992	-2.25287	-1.89544	-1.26523	-2.59271	-1.69219	-1.73826	-1.75008	-0.175229
YNL297C	MON2	-0.0487161	0.11463	0.0911276	-1.75922	-0.788967	-0.363702	-1.97449	-1.8369	-1.88113	-1.64418	0.229106
YDL063C	SYO1	0.248916	0.458445	0.61757	-0.430567	-1.14202	-0.927379	-2.01972	-2.12419	-2.0921	-1.9726	-1.11903
YBR036C	CSG2	-0.175469	0.122548	-0.0803304	-1.48353	-1.07879	-0.738571	-2.31184	-2.19507	-1.89178	-2.0699	0.491691
YMR044W	IOC4	-0.138887	0.188768	0.0623482	-2.10016	-1.15563	-0.556724	-2.80543	-2.58689	-2.73023	-2.40477	-0.201419
YDR500C	RPL37B	-0.281527	-0.0745994	-0.339746	-0.975193	-1.30891	-0.960236	-2.16802	-1.81267	-1.4895	-0.998313	-0.240626
YOR354C	MSC6	0.000407245	0.217053	0.0884379	-1.64328	-0.90083	-0.413089	-1.70639	-1.70097	-1.73057	-1.5547	0.394338
YKL004W	AUR1	-0.263402	0.020866	-0.229313	-1.23637	-1.31824	-0.968867	-2.18363	-2.11116	-1.77954	-1.99148	-0.606581
YPL011C	TAF3	-0.0864407	0.212505	0.118439	-1.32016	-0.752823	-0.425194	-1.85699	-1.61106	-1.73887	-1.84347	-0.0597078
YJL010C	NOP9	-0.0944709	0.309616	0.215826	-1.34722	-1.18068	-0.672874	-3.05212	-2.64043	-2.64141	-2.29661	-0.840496
YDL212W	SHR3	-0.101567	0.14205	-0.118648	-1.21541	-1.21855	-0.765902	-2.33327	-1.78888	-1.58993	-1.29031	-0.154135
YNL135C	FPR1	-0.0941729	0.100271	0.387242	-0.831	-0.383221	0.0433327	1.39922	1.4947	1.4161	0.685427	0.1934
YNL130C	CPT1	-0.544825	-0.322531	-0.267565	-2.58631	-2.18523	-1.94523	-0.51443	-1.85941	-1.52345	-1.67834	-0.172118
YOL021C	DIS3	-0.282125	0.135692	-0.0434299	-1.51288	-1.43542	-0.920794	-2.29845	-2.18512	-2.35374	-2.08063	-0.440967
YGL108C	YGL108C	-0.150994	0.155477	0.112818	-1.39977	-1.08741	-0.754436	-2.34483	-2.04673	-1.78675	-2.2937	-0.0765518
YDR169C	STB3	-0.111256	0.015955	-0.0558352	-2.12887	-1.05943	-0.67025	-2.21902	-1.89644	-2.30569	-1.79086	0.185179
YNL313C	EMW1	-0.100152	0.200849	0.0975442	-1.12988	-1.19813	-0.701126	-2.44561	-2.2169	-2.31317	-2.07182	-0.754044
YCR034W	ELO2	-0.377223	-0.0928157	-0.176705	-1.9281	-1.77971	-1.23895	-2.36341	-2.2064	-1.84599	-2.04231	-0.333765
YML001W	YPT7	-0.223206	0.257552	-0.0814006	-1.26704	-0.687533	-0.481114	-2.22884	-2.36508	-2.309	-1.77576	0.145952
YDL171C	GLT1	0.166348	0.25055	0.0456412	-1.03381	-0.771319	-0.526827	-1.23573	-1.56341	-1.55082	-1.25812	-0.29651
YER063W	THO1	0.0483735	0.0335724	-0.189561	-1.66807	-1.13701	-0.736981	-3.78095	-3.18753	-3.2085	-2.92489	-0.151322
YKR063C	LAS1	-0.102257	0.0606824	0.0569736	-1.17464	-1.14781	-0.672232	-2.27077	-2.5386	-2.1703	-2.12965	-0.326754
YDL072C	YET3	-0.41226	-0.298695	-0.376741	-1.76556	-1.45539	-0.977104	-2.12982	-1.86119	-1.77978	-1.72134	1.3469
YKL176C	LST4	-0.0912203	-0.0385617	0.109137	-1.34935	-1.00092	-0.585015	-1.87673	-1.77413	-1.69911	-1.68604	0.186639
YIR033W	MGA2	-0.336464	-0.269473	-0.136867	-1.48801	-0.697298	-0.25611	-2.5145	-1.90193	-1.90806	-1.67257	-0.287428
YKL185W	ASH1	-1.56734	-1.03538	-0.858998	-3.02588	-2.42131	-2.00826	-0.0837547	-0.266095	-0.514697	-0.483908	0.420232
YKL044W	YKL044W	-1.69137	-0.843221	-0.75112	-3.68186	-3.04229	-2.59657	-0.286213	0.0343277	0.270912	-0.511042	-0.497919
YDR005C	MAF1	-0.229027	0.182732	0.0860052	-2.28585	-0.971185	-0.450636	-1.61681	-1.71549	-1.76755	-1.53884	0.207542
YNL191W	DUG3	-0.501812	-0.183269	-0.31137	-0.825957	-1.71283	-1.5008	-1.6031	-2.03884	-1.45697	-1.92298	-0.359562
YNR019W	ARE2	-1.02113	-1.00895	-0.787887	-3.67316	-3.23074	-2.82172	-0.946125	-0.393077	-0.224115	-0.772593	0.0422195
YBL064C	PRX1	-0.558103	-0.554128	-1.05642	-2.25103	-2.18256	-1.74473	-0.0267186	0.180297	0.453062	-0.553865	0.769926
YNL041C	COG6	0.0112697	0.196623	0.139006	-1.55352	-0.638962	-0.289004	-1.91881	-1.89487	-1.95254	-1.92068	-0.0191598
YKL143W	LTV1	0.180485	0.320167	0.270596	-0.595868	-1.40296	-0.807577	-2.64999	-2.28666	-2.27736	-2.17283	-0.864932
YLR071C	RGR1	-0.0105363	0.0988844	0.0727818	-1.62351	-0.989801	-0.482496	-1.83153	-1.91051	-1.97827	-1.68691	-0.202273
YLR026C	SED5	-0.0879419	0.113985	0.122061	-1.71167	-1.23102	-0.610135	-1.95282	-1.69971	-2.43719	-1.89038	-0.0432827
YNL272C	SEC2	-0.0930858	0.108252	0.210518	-1.78401	-0.910641	-0.462126	-1.80014	-1.82502	-2.01548	-1.55133	-0.209346
YOR227W	HER1	-0.330667	0.153264	0.0257485	-0.84556	0.0603618	0.199791	-0.705598	0.115522	0.0553261	-0.0763141	1.15555
YOR285W	RDL1	-0.102169	-0.057627	-0.432753	-1.06891	0.0984232	0.584733	-1.59392	-1.94586	-1.82147	-1.11867	1.27823
YKL087C	CYT2	-0.142557	0.314335	0.0427344	-1.012	-1.2085	-1.04445	-1.41229	-1.57068	-1.28305	-1.74219	0.398101
YBR122C	MRPL36	0.0966958	0.173464	-0.145529	-1.54204	-1.36872	-0.846788	-2.27788	-1.99551	-1.82327	-2.02258	0.328126
YJR042W	NUP85	-0.0204839	0.269571	0.248067	-1.51887	-1.09256	-0.711251	-1.61741	-1.60387	-1.67138	-1.36218	-0.0814551
YCR003W	MRPL32	0.138358	0.154748	0.274299	-1.05315	-0.957438	-0.508752	-2.37446	-2.28467	-1.97581	-2.26152	0.282316
YLR028C	ADE16	-0.193485	-0.0594799	-0.223295	-1.60717	-1.56517	-1.05036	-2.52805	-2.2864	-2.19149	-1.90819	0.323595
YJL104W	PAM16	-0.108216	0.119696	-0.185887	-1.44102	-1.6435	-0.823442	-2.64693	-2.10793	-1.91373	-2.46033	0.0356948
YDL226C	GCS1	-0.290348	0.148025	0.161488	-1.56966	-1.28635	-0.708045	-2.26994	-1.81697	-2.12954	-2.09356	-0.295128
YOR372C	NDD1	-0.0543575	-0.0737106	-0.0903896	-2.00992	-1.00121	-0.53471	-1.59969	-1.94632	-2.11378	-2.21975	0.0547776
YOL020W	TAT2	-0.554596	-0.224074	-0.367411	-0.824043	-1.4592	-1.22932	-2.90947	-2.66583	-2.3684	-2.37181	-0.221769
YDR210W	YDR210W	-0.142705	-0.133734	-0.105355	-1.8996	-1.84132	-1.19395	-2.05525	-1.56334	-0.688799	-1.46588	0.070568
YGR183C	QCR9	-0.0942676	-0.00459924	-0.276517	-1.01735	-0.0421082	0.190159	-2.04053	-1.67818	-1.37198	-1.78159	0.944251
YDR262W	YDR262W	0.025276	0.0580192	0.0868213	-0.673936	-0.842058	-0.525007	-1.74275	-1.63916	-1.46474	-1.84258	0.56704
YML086C	ALO1	-0.525119	-0.258333	-0.454544	-1.30914	-1.7174	-1.2418	-2.58745	-2.18134	-1.97037	-1.9759	-0.0702392
YIL041W	GVP36	-0.135231	0.218826	0.089616	-1.53313	-1.15978	-0.75298	-1.97936	-1.64984	-1.92707	-1.59676	0.0701086
YGR245C	SDA1	-0.0470703	0.31878	0.371125	-0.856678	-1.38464	-1.06306	-2.66513	-2.59136	-2.6009	-2.10093	-1.01976
YNR038W	DBP6	-0.0271285	0.296886	0.295446	-1.02621	-1.00485	-0.648093	-2.26048	-2.22802	-2.25407	-1.97238	-0.790222
YER022W	SRB4	-0.070257	0.175304	0.13875	-1.63841	-0.808613	-0.204466	-2.17422	-2.10121	-2.42727	-1.97151	0.0190339
YDL035C	GPR1	0.0030107	0.104908	0.152139	-1.29264	-0.822793	-0.45784	-2.41741	-2.28052	-2.43741	-1.98999	0.341567
YJR125C	ENT3	-0.0559359	0.214142	0.00906394	-1.77371	-1.07217	-0.497274	-1.89571	-1.62172	-1.60704	-1.77889	0.437921
YCL030C	HIS4	0.260836	0.26676	0.193	-0.562557	-1.05973	-0.958864	-0.538939	-0.449388	-0.516837	-0.884063	-0.513417
YLL021W	SPA2	-0.356031	0.0380525	0.0998045	-1.84335	-1.11545	-0.524783	-2.31684	-1.93345	-2.1847	-1.86107	-0.210585
YOR159C	SME1	-0.0134987	0.191363	-0.105109	-1.553	-1.20953	-0.680556	-2.46923	-1.93776	-1.87461	-2.17904	-0.568977
YPL059W	GRX5	-0.153052	0.0176745	-0.0438094	-0.913003	-0.908204	-0.475297	-2.40049	-1.98141	-2.00777	-1.93249	0.264724
YLR052W	IES3	0.018183	0.198731	0.289372	-1.45097	-1.25766	-0.773691	-1.78821	-1.8285	-2.08198	-1.86291	-0.140124
YGL106W	MLC1	-0.361388	0.146158	-0.504522	-1.31866	-1.60433	-1.2385	-2.59347	-2.02354	-1.81042	-1.73035	-0.10095
YDR527W	RBA50	-0.233659	0.0934685	0.132938	-0.742798	-1.43892	-1.17196	-3.07068	-2.99135	-2.83885	-2.47087	-0.45872
YIL112W	HOS4	-0.157354	0.166832	0.289474	-1.90166	-0.966631	-0.2671	-2.15924	-2.0402	-2.43339	-1.95683	-0.0369883
YOR375C	GDH1	0.176182	0.217961	-0.686215	-0.986574	0.306106	0.320708	-0.381148	-0.0925751	-0.370688	-0.589153	0.721735
YOR165W	SEY1	-0.204918	0.00673165	0.00742823	-1.8014	-0.990692	-0.659037	-2.53587	-2.13743	-2.08919	-2.07571	-0.177166
YFL013C	IES1	0.0768334	0.232618	0.197103	-1.63852	-0.739131	-0.223197	-1.98221	-1.82257	-2.13338	-1.87208	0.112637
YKL033W-A	YKL033W-A	-0.0665054	0.184438	-0.122761	-1.06633	-0.662577	-0.638076	-2.8568	-2.24728	-1.8247	-1.71628	0.097288
YNL221C	POP1	0.0131997	0.0894106	0.0339546	-0.738132	-1.08358	-0.833684	-2.19691	-2.22994	-2.14601	-2.04869	-0.415869
YEL003W	GIM4	0.156231	0.255275	0.369968	-1.19642	-0.873442	-0.233604	-2.12148	-2.25303	-1.9099	-1.96853	-0.157388
YOR142W	LSC1	-0.339335	0.0499096	-0.183836	-1.63202	-0.883205	-0.311394	-1.28397	-1.1471	-1.11227	-1.28933	0.665471
YBR126C	TPS1	-0.464775	-0.10113	-0.521086	-2.86756	-1.00246	-0.686041	-0.740548	-0.483097	-0.545115	-1.33385	2.01944
YNR031C	SSK2	-0.231712	-0.0139188	-0.136396	-1.77893	-1.26011	-0.625263	-1.8276	-1.93437	-2.01193	-1.82724	-0.0636241
YMR291W	TDA1	-0.757026	-0.847704	-0.351575	-2.66059	-1.97358	-2.03607	-0.646561	-0.536928	-0.615605	-1.09083	0.681597
YMR093W	UTP15	0.0299772	0.322614	0.258486	-0.900869	-1.34994	-0.991604	-2.22795	-2.16703	-2.13997	-1.87548	-0.754663
YJL192C	SOP4	-0.124343	-0.0828387	-0.0266591	-1.29287	-1.0523	-0.492481	-2.32552	-2.00971	-1.88054	-1.79722	0.0162647
YMR212C	EFR3	0.0366434	0.281585	0.154884	-1.59744	-1.09982	-0.636924	-2.37762	-2.15067	-2.31609	-1.74828	-0.495639
YPR097W	YPR097W	-0.078172	0.0611211	-0.109139	-1.80905	-1.32913	-0.6936	-2.21384	-2.0105	-2.19002	-1.91103	-0.213262
YNL268W	LYP1	-0.375203	-0.218473	-0.246383	-0.824907	-1.33562	-1.03002	-1.53543	-1.75186	-1.44406	-1.51956	0.136019
YLR336C	SGD1	0.154573	0.381431	0.39175	-0.759738	-0.626056	-0.160523	-1.95636	-2.14076	-1.9935	-1.81302	-0.625227
YGL233W	SEC15	-0.0337714	0.209414	-0.0628258	-1.71697	-0.853568	-0.420299	-2.24682	-2.24071	-2.09304	-1.96806	0.120346
YGR207C	CIR1	-0.103587	0.068508	-0.041236	-1.15731	-0.704554	-0.436006	-2.75495	-2.53167	-2.3824	-2.57235	0.522994
YNL010W	YNL010W	-0.0903728	-0.00179816	-0.0656071	-1.70051	-1.28961	-0.770193	-2.87123	-1.85118	-1.83394	-1.72476	-0.269366
YGR184C	UBR1	-0.182185	0.0607641	-0.0821217	-1.70923	-1.05474	-0.546029	-2.18758	-1.90947	-2.05301	-1.87032	0.251642
YPL195W	APL5	-0.108948	0.198678	0.0206619	-1.68023	-1.03183	-0.503065	-2.16052	-1.96752	-2.1115	-1.85235	-0.118321
YDR378C	LSM6	0.130751	0.340664	0.240468	-0.757252	-1.06835	-1.04418	-2.15557	-1.52488	-1.08164	-1.14361	0.247273
YBR253W	SRB6	0.0146152	0.262418	0.1752	-1.28925	-0.891382	-0.531155	-1.99229	-1.58523	-1.95851	-1.45728	0.176546
YIL056W	VHR1	-0.665736	-0.532667	0.241445	-1.42911	-1.46469	-1.36641	-0.0484782	0.189227	-0.0432124	-0.50351	0.178249
YOR085W	OST3	-0.310287	0.0925925	-0.160041	-1.86078	-1.20698	-0.67388	-2.01217	-1.76023	-1.71514	-1.73659	-0.103295
YHR026W	VMA16	-0.272781	0.190825	-0.201822	-1.29808	-1.15049	-0.659644	-2.41712	-1.636	-1.51187	-1.32142	-0.132841
YDL112W	TRM3	0.00977709	0.257332	0.166745	-1.12395	-1.18434	-0.620991	-2.14464	-2.16112	-2.12456	-1.71628	-0.575298
YLR357W	RSC2	-0.244986	0.047459	0.0586834	-1.59442	-1.1446	-0.647845	-1.96071	-1.92892	-2.19767	-1.86453	-0.382968
YDL198C	GGC1	-0.156965	-0.244629	-0.434533	-0.100304	-1.3248	-1.46561	-1.50082	-1.00491	-0.634068	-1.38191	-0.354517
YPR105C	COG4	-0.276017	-0.0489703	-0.0976023	-1.44904	-1.12854	-0.680915	-2.45138	-2.1651	-2.31527	-2.20785	-0.265178
YBR054W	YRO2	-1.76661	-2.20732	-3.63902	-6.9838	-6.68566	-5.07126	-1.38751	-0.125248	0.0949137	-0.709162	2.04327
YOR311C	DGK1	0.209921	0.162831	0.0898411	-0.776443	-0.756679	-0.292351	-1.43898	-1.48935	-1.33112	-1.6421	-0.176117
YHR006W	STP2	-0.0690821	0.0181175	0.059543	-1.54767	-1.08095	-0.804812	-1.95907	-1.92967	-1.97933	-1.75536	0.296968
YKR100C	SKG1	0.0655174	0.218886	0.284359	-1.62467	-0.849091	-0.44398	-1.96108	-1.93631	-1.85773	-1.59637	0.124584
YGL013C	PDR1	-0.323013	-0.114784	-0.256973	-1.63573	-1.2186	-0.627384	-2.40686	-2.24049	-2.52455	-2.12358	0.0193096
YPL053C	KTR6	-0.125905	0.0498232	-0.0750352	-1.71571	-0.965628	-0.723327	-2.16453	-2.15391	-1.69948	-1.97242	0.0782278
YJR134C	SGM1	-0.0732576	0.103323	0.252352	-1.81752	-0.760799	-0.279797	-2.27554	-1.8106	-2.23963	-2.10823	0.0304499
YOR241W	MET7	-0.0980603	0.185283	0.104169	-1.37078	-0.990042	-0.498592	-1.95361	-1.68632	-2.01134	-1.77865	-0.17002
YLL034C	RIX7	-0.045046	0.31527	0.249723	-1.08423	-1.20996	-0.732472	-2.49267	-2.4143	-2.20153	-1.9111	-0.833544
YGL038C	OCH1	-0.192665	-0.0819016	-0.0895915	-2.03809	-1.59542	-1.05942	-1.68562	-0.949064	-1.03434	-1.41384	0.860498
YKL204W	EAP1	-0.195817	0.0622483	0.123814	-1.69822	-1.14136	-0.494125	-1.9443	-1.61171	-2.18703	-1.87467	0.00125349
YDR146C	SWI5	-0.372071	-0.140852	-0.153872	-2.93081	-1.57372	-0.931648	-2.3284	-1.99086	-2.36895	-1.7823	0.18645
YKR031C	SPO14	-0.08773	0.0430376	-0.0389359	-1.7063	-0.765657	-0.335802	-2.21266	-2.12956	-2.21257	-1.81081	0.1745
YPR125W	YLH47	-0.198938	0.0541418	-0.0949736	-1.18626	-1.41711	-1.02412	-2.30425	-2.36239	-2.79336	-2.41285	-0.155325
YKR061W	KTR2	-0.923094	-0.922308	-1.19754	-0.847964	-2.57368	-2.72022	-0.50238	-0.610391	-0.336789	-0.75339	0.563847
YMR255W	GFD1	-0.286591	0.187938	0.227514	-1.9834	-1.25653	-0.616337	-2.63498	-1.53607	-2.09438	-2.24205	0.215684
YNL236W	SIN4	0.0213934	0.212091	0.116518	-1.41893	-1.04639	-0.661917	-1.83215	-1.85389	-2.06973	-1.95022	-0.136037
YOR191W	ULS1	-0.0891115	0.0854969	-0.0258405	-1.85709	-0.97326	-0.535004	-2.31701	-2.23318	-2.31346	-1.91294	0.00852621
YIL030C	SSM4	-0.179846	0.0566929	-0.0983336	-1.31848	-1.12259	-0.626961	-1.88338	-1.99116	-1.92303	-1.74109	-0.155903
YBR179C	FZO1	-0.21653	0.0599758	0.0273189	-1.67284	-1.14623	-0.793321	-2.21333	-2.13582	-2.22903	-2.13565	0.0702002
YDR034C	LYS14	0.188144	0.22842	0.286409	-1.09158	-0.804671	-0.596039	-2.6702	-2.48331	-2.56291	-2.25747	0.0317258
YDR219C	MFB1	-0.294277	-0.0993737	-0.0864228	-2.15448	-1.13098	-0.559102	-1.68555	-1.89914	-1.92727	-1.90799	0.157288
YOR103C	OST2	0.0247809	0.146575	0.0904322	-0.978069	-1.03551	-0.968996	-2.83388	-1.91186	-1.62832	-2.37776	0.242715
YNL006W	LST8	-0.137319	0.356154	0.119502	-1.40651	-1.30448	-1.08019	-2.03155	-2.21258	-2.33796	-2.07433	0.180736
YDR333C	RQC1	0.15163	0.26618	0.231603	-1.42419	-0.859915	-0.495858	-1.4971	-1.65904	-1.71142	-1.49012	-0.0492211
YDR027C	VPS54	0.00714553	0.162972	0.126553	-1.99967	-1.00921	-0.609482	-1.86959	-1.77436	-1.9306	-1.65714	0.0548622
YKR093W	PTR2	-0.237566	0.0600627	-0.497441	-1.63178	-0.00898457	0.755546	1.44262	0.148848	0.185921	-0.307252	1.47026
YHR020W	YHR020W	-0.0653193	0.390363	0.0963448	-0.741648	-1.5069	-1.10452	-2.57884	-2.07659	-1.97458	-1.79982	-0.745733
YJL098W	SAP185	-0.0851408	0.246555	0.304695	-0.976043	-1.38396	-0.94995	-2.46901	-2.48101	-2.64712	-2.08428	-0.669114
YNL239W	LAP3	-0.354206	-0.462162	-0.0985616	-1.66944	-1.35592	-1.11707	-1.20831	-1.23209	-1.05554	-1.34548	0.620941
YEL061C	CIN8	-0.203789	-0.0699074	-0.0399917	-2.00786	-1.27513	-0.724448	-1.86825	-1.95374	-2.10183	-2.1949	0.127091
YGL140C	YGL140C	-0.0549576	0.270288	0.081401	-1.60012	-0.867601	-0.352972	-1.99864	-1.95563	-2.07656	-1.76591	-0.12111
YPR070W	MED1	-0.0288188	0.0624198	0.0898199	-1.5091	-1.23464	-0.788044	-2.15353	-2.15937	-2.13293	-2.06938	-0.276268
YBL007C	SLA1	-0.239062	0.10664	-0.0581833	-2.25256	-1.14266	-0.551578	-1.91332	-1.60874	-1.80086	-1.55972	0.0808284
YNR068C	YNR068C	-0.13709	-0.215636	-0.257958	-1.14814	-1.75655	-1.4966	-2.56373	-1.69736	-1.96542	-2.12474	0.640645
YBR142W	MAK5	-0.12473	0.233187	0.264854	-0.857063	-1.22159	-0.664001	-2.98259	-2.5814	-2.66044	-2.04696	-1.03877
YLR113W	HOG1	-0.570049	-0.0271052	-0.101547	-1.60411	-1.81486	-1.42638	-2.17947	-1.13183	-1.25245	-1.48154	0.113214
YER129W	SAK1	-0.00320545	0.223595	0.126118	-1.68385	-1.04111	-0.651483	-1.59609	-1.66979	-1.87175	-1.7668	0.0271191
YNL252C	MRPL17	-0.339037	0.0502893	-0.00235076	-1.53284	-1.31853	-0.878651	-3.72327	-2.7478	-2.73024	-2.66191	-0.106872
YER127W	LCP5	0.237535	0.423452	0.401917	-0.53202	-1.44467	-1.00794	-2.28384	-2.31545	-2.3872	-1.91774	-0.651932
YDR087C	RRP1	-0.16881	0.31158	0.295111	-1.11849	-1.52119	-0.992817	-2.51327	-1.8017	-2.17658	-1.87687	-0.944234
YMR140W	SIP5	0.0444857	0.110275	0.0987715	-1.55014	-0.116137	0.287647	-1.60508	-1.61527	-1.89623	-1.89867	1.67781
YDR515W	SLF1	-0.0430539	-0.00331581	-0.00164995	-1.77411	-1.23692	-0.984816	-1.82628	-2.12573	-2.28997	-2.13757	-0.0804497
YGR158C	MTR3	-0.067942	0.17363	0.127597	-1.15795	-1.09749	-0.693062	-2.88902	-3.16723	-3.11433	-2.74556	-0.331171
YMR256C	COX7	0.192552	-0.0307659	-0.0667446	-1.84289	-1.04968	-0.505852	-2.16659	-1.92756	-1.02963	-1.50752	0.832501
YER092W	IES5	-0.245836	-0.00195662	0.273888	-0.441048	-0.572544	-0.278628	-2.32046	-2.26044	-1.77175	-2.33278	0.379098
YHR201C	PPX1	-0.0409119	0.101582	0.022463	-1.29707	-1.33852	-0.703126	-2.03164	-1.74192	-1.86733	-2.0051	-0.172986
YJL176C	SWI3	-0.0233086	0.101565	0.050409	-1.79649	-1.09263	-0.594975	-2.01762	-1.69889	-2.03708	-1.63718	-0.26515
YFL036W	RPO41	-0.0218462	0.115921	-0.103601	-1.65667	-0.868395	-0.517668	-2.22298	-1.7267	-1.78262	-1.81871	0.212771
YDR468C	TLG1	0.0917215	0.244923	0.0619436	-1.37805	-0.896048	-0.499926	-2.43043	-2.43384	-2.03907	-2.09324	0.0867477
YDL003W	MCD1	-1.28224	-0.993067	-1.0723	-2.41952	-2.45856	-1.98226	-0.836821	-0.509215	-0.4629	-0.908648	-0.154218
YLR019W	PSR2	-0.14824	0.137965	0.0523513	-1.74574	-1.21015	-0.581135	-1.9039	-2.03235	-2.11205	-1.98867	0.0272794
YDR407C	TRS120	-0.120605	0.0747607	0.0621875	-1.69027	-0.903631	-0.460692	-1.75287	-1.773	-1.86763	-1.7556	0.11941
YFL048C	EMP47	-0.0155453	0.217199	0.0211299	-1.51671	-0.992347	-0.60696	-2.23638	-1.99751	-2.03092	-1.65778	-0.00489653
YLR181C	VTA1	-0.196694	0.0988284	0.113757	-1.30435	-0.657567	-0.137789	-2.10677	-1.90672	-2.0644	-2.33991	0.133609
YOR157C	PUP1	-0.190602	-0.0264386	-0.435922	-1.23732	-1.72623	-1.30587	-2.11314	-1.78895	-1.54439	-2.01165	0.450456
YGR200C	ELP2	-0.0699667	0.23701	0.0936252	-1.274	-1.33255	-0.928459	-2.89083	-2.47913	-2.43318	-2.09116	-0.636179
YOR021C	SFM1	-0.0118112	0.251973	0.274472	-0.879007	-1.46457	-0.928891	-2.45911	-2.40068	-2.18415	-1.90156	-0.462824
YDR328C	SKP1	-0.165859	0.191486	0.0498961	-1.83021	-0.894407	-0.468583	-2.46642	-2.06564	-1.85467	-1.93945	0.232887
YMR153W	NUP53	-0.0974089	0.0614445	0.0106498	-1.36213	-1.11907	-0.540976	-2.12263	-2.01158	-1.97324	-1.75657	-0.217325
YER082C	UTP7	-0.0962486	0.288776	0.251057	-1.05487	-1.43838	-0.852458	-3.21272	-2.62399	-2.73028	-2.32503	-0.649285
YJL196C	ELO1	-0.73357	-0.601286	-0.726354	-1.7037	-1.75688	-1.02605	-1.51779	-0.988493	-0.433193	-0.956047	0.180234
YJL183W	MNN11	-0.303291	0.180983	-0.0545334	-1.42144	-0.654329	-0.219172	-2.39604	-1.75607	-1.8603	-2.06289	-0.262342
YDR081C	PDC2	0.0324575	0.167839	0.269668	-1.45741	-0.920991	-0.436435	-1.82616	-1.77454	-1.92072	-1.76334	-0.188779
YER166W	DNF1	-0.274007	-0.0444056	-0.215847	-2.03399	-1.35074	-0.873625	-2.39975	-2.13113	-2.16716	-1.98323	0.0543387
YBR140C	IRA1	-0.127395	0.120313	0.0163551	-1.76784	-0.864312	-0.352741	-1.95306	-1.89302	-1.83947	-1.59557	0.316118
YJR091C	JSN1	-0.31069	-0.0544766	-0.184481	-1.98027	-1.13676	-0.617581	-1.95924	-1.8703	-1.99129	-1.81846	0.25506
YLR084C	RAX2	-0.350108	-0.193302	-0.348221	-1.40189	-1.54183	-1.16749	-1.56782	-1.02071	-1.02988	-1.20783	-0.207242
YJR092W	BUD4	-0.326057	-0.0750741	-0.104802	-2.50712	-1.53823	-0.76371	-2.18595	-1.72009	-1.93412	-1.66133	0.141268
YDR326C	YSP2	-0.0828783	0.0461709	-0.0454168	-1.34046	-0.825307	-0.343105	-2.06904	-1.9807	-2.06267	-1.70741	-0.119985
YBL085W	BOI1	-0.398596	-0.111979	-0.264287	-2.13717	-1.22717	-0.660967	-2.30683	-2.04909	-2.36372	-2.04181	-0.166776
YHR049W	FSH1	-1.01761	-0.912678	-0.918542	-2.0542	-3.1922	-2.89742	-1.60154	-0.840978	-0.926418	-0.865074	-0.328921
YNR022C	MRPL50	-0.316036	0.15665	0.322547	-1.21833	-0.925332	-0.276323	-2.11809	-1.66354	-1.84352	-1.94966	0.239023
YLR182W	SWI6	-0.173643	0.0906689	0.0129515	-1.65035	-1.01692	-0.470324	-2.054	-1.99325	-2.02247	-2.13611	-0.28866
YKR092C	SRP40	-0.0393361	0.461993	0.163814	-0.614932	-1.46588	-0.982774	-2.73604	-2.33078	-2.28319	-2.56134	-0.865009
YIL094C	LYS12	-0.0439179	-0.00427806	-0.119338	-0.0708147	-1.18599	-0.753514	-2.18915	-1.9957	-2.25377	-1.80992	0.20915
YGL151W	NUT1	0.0507781	0.344627	0.330407	-1.8651	-0.969215	-0.53079	-1.63157	-1.52086	-1.60737	-1.41308	0.106773
YGR072W	UPF3	0.200808	0.320531	0.272823	-1.22222	-0.877393	-0.241106	-2.17972	-1.80763	-2.00662	-2.18324	-0.336687
YOR283W	YOR283W	-0.116005	0.10026	-0.104393	-1.3418	-1.01112	-0.881222	-2.72638	-2.88527	-2.07661	-2.17778	-0.0708124
YDR150W	NUM1	-0.258995	-0.11003	-0.11944	-1.91759	-1.16964	-0.578288	-1.97308	-1.63299	-1.90884	-1.63519	0.275674
YHL002W	HSE1	-0.0927666	0.128239	-0.0427401	-1.70498	-1.05072	-0.473634	-1.71196	-1.64442	-1.90326	-1.83397	0.127714
YBR149W	ARA1	-0.241088	-0.141203	-0.485037	-2.273	-0.942572	-0.635059	-1.368	-1.20547	-1.29259	-1.43814	1.55768
YGL090W	LIF1	-0.0138929	-0.0975231	-0.181532	-1.61164	-0.782316	-0.517899	-2.25527	-1.75055	-1.96226	-2.03904	0.262369
YNL216W	RAP1	-0.187558	0.255465	0.161875	-1.95023	-1.43536	-0.903219	-2.30727	-2.35047	-2.38979	-2.36171	-0.382722
YLR023C	IZH3	0.159878	0.285543	0.069266	-0.611396	-0.447672	-0.273449	-1.4109	-1.12734	-1.16429	-1.30222	0.577369
YBL050W	SEC17	-0.0269918	0.123972	-0.106907	-1.46456	-0.704315	-0.544339	-2.30285	-1.90309	-1.53652	-1.86167	0.26878
YKL154W	SRP102	-0.00522755	0.175976	0.0166534	-1.27705	-1.06924	-0.695424	-2.03763	-1.81046	-1.85592	-1.683	-0.36913
YDL073W	YDL073W	0.154674	0.228727	0.344709	-1.23083	-0.394369	-0.0103609	-1.54966	-1.69897	-1.65629	-1.61144	-0.22096
YPL184C	MRN1	-0.19453	0.125618	0.00488048	-1.97	-1.06258	-0.698304	-1.82927	-1.53161	-1.45618	-1.36781	-0.0903045
YIL091C	UTP25	0.0594847	0.334263	0.416254	-0.834133	-1.3441	-0.891282	-2.35582	-2.13302	-2.20526	-1.98351	-0.745307
YKL192C	ACP1	-0.263062	-0.181277	-0.421368	-1.57529	-1.34564	-1.08001	-2.2952	-2.32546	-2.24388	-1.78421	0.324856
YJL207C	LAA1	-0.0451729	0.174446	0.0150613	-1.6889	-1.12304	-0.622584	-2.17176	-2.04582	-2.10756	-1.89607	-0.0610445
YLR371W	ROM2	-0.0923463	0.0459703	-0.103238	-1.97127	-1.09932	-0.636497	-1.92793	-1.85662	-1.77486	-1.68883	0.474243
YKL213C	DOA1	-0.209405	-0.0140302	-0.198221	-2.00429	-1.62404	-1.14033	-1.91002	-1.76245	-1.87192	-1.99304	0.410765
YNL156C	NSG2	-0.238274	-0.169763	-0.0978917	-1.55197	-0.895472	-0.5122	-1.80963	-1.6786	-1.65417	-1.86954	0.62024
YDR390C	UBA2	-0.00254706	0.233371	0.145118	-1.46861	-0.919517	-0.662909	-2.44832	-2.5336	-2.5204	-2.27501	-0.0630527
YPR008W	HAA1	-0.282297	-0.00456365	-0.146193	-1.84909	-1.80229	-1.21677	-2.57067	-2.23711	-2.50686	-2.28144	0.0697015
YNL039W	BDP1	-0.109352	0.137697	0.201585	-1.98186	-1.22888	-0.568845	-2.35448	-1.90841	-2.21514	-2.16661	-0.123236
YEL001C	IRC22	-0.244561	0.0939605	-0.3612	-1.2875	-0.937303	-0.565837	-3.046	-2.36013	-1.64959	-1.82176	0.0828446
YDL085C-A	YDL085C-A	-0.051652	0.111731	0.192163	-0.721284	-0.894965	-0.079736	-2.63365	-1.30476	-1.3196	-1.83856	0.278623
YDR334W	SWR1	-0.173102	-0.05859	-0.19977	-1.94187	-1.58209	-0.991423	-2.2985	-2.05924	-2.14505	-2.18757	-0.015919
YLR133W	CKI1	-0.418118	-0.268728	-0.128507	-3.46427	-1.79325	-1.33454	-2.53005	-2.18764	-2.30261	-2.14178	-0.0119833
YMR129W	POM152	-0.072204	0.213289	0.0636022	-1.52808	-1.02925	-0.671655	-2.22871	-1.90227	-1.96086	-1.80668	-0.363736
YJL069C	UTP18	0.00983798	0.300225	0.202217	-0.684613	-1.2397	-0.698218	-2.2202	-1.99446	-2.17959	-2.19149	-0.434262
YOR323C	PRO2	-0.00275945	0.22658	-0.0347551	-1.25627	-1.22783	-0.828676	-2.38331	-1.85648	-1.58485	-1.59938	-0.114165
YLR370C	ARC18	-0.117434	0.0129415	-0.101548	-2.16205	-1.39645	-0.973262	-1.90767	-1.66718	-1.40401	-1.50016	0.332005
YMR305C	SCW10	-0.738031	-0.360015	-0.799909	-2.20412	-1.6034	-0.730273	-1.10451	-0.415366	-0.501312	-0.774332	0.60125
YML031W	NDC1	-0.291317	0.2098	0.16063	-1.32694	-1.03103	-0.442884	-1.7937	-1.84398	-1.71881	-1.91722	-0.0883901
YJR086W	STE18	-0.0619115	0.0377546	0.20949	-1.32596	-0.902125	-0.53558	-2.13763	-1.84465	-1.37041	-1.03329	0.35505
YCR042C	TAF2	-0.0730598	0.21963	0.127675	-1.57975	-0.804261	-0.264717	-2.29958	-1.95296	-2.0223	-1.76953	0.206305
YGL091C	NBP35	-0.16838	-0.158786	-0.33832	-0.532959	-0.857306	-0.729233	-2.06008	-1.93465	-2.0903	-2.08746	0.133311
YBR165W	UBS1	0.000773213	0.120394	0.220864	-1.54928	-0.724084	-0.368521	-1.85401	-2.2388	-2.23505	-1.89201	-0.0435703
YJL082W	IML2	-0.553202	-1.17876	-0.772738	-3.52742	-2.60485	-2.32814	-1.15462	-1.36251	-1.33746	-1.08719	0.48364
YER007C-A	TMA20	-0.0620585	-0.0201225	-0.141409	-1.14543	-1.20914	-0.727455	-2.81422	-2.17521	-2.03905	-2.18794	-0.326421
YPR100W	MRPL51	-0.0683691	0.125972	0.122527	-1.77777	-1.38159	-0.898326	-2.47202	-1.65325	-1.35867	-2.094	0.3953
YNL219C	ALG9	-0.159163	5.05e-05	-0.118844	-1.67371	-1.1593	-0.660326	-2.39685	-2.29315	-2.04512	-2.05919	-0.119346
YOR145C	PNO1	0.181604	0.297383	0.211618	-0.569647	-1.44639	-1.11292	-3.34926	-2.7928	-2.18519	-2.52515	-0.722094
YOR048C	RAT1	-0.0748626	0.153659	0.147297	-1.46887	-1.13554	-0.629788	-2.45644	-2.07451	-2.38488	-1.80828	-0.285377
YKR067W	GPT2	-0.159218	0.430779	-0.00301622	-1.25582	-0.44461	-0.211983	-1.45832	-1.75583	-1.39682	-1.88043	1.00969
YDR166C	SEC5	-0.147467	0.149157	0.139713	-1.89417	-0.854693	-0.472214	-1.84185	-1.73856	-1.83725	-1.70506	0.00972811
YDR337W	MRPS28	-0.0517344	0.292906	0.0870194	-1.72113	-0.988813	-0.79197	-2.51568	-2.03525	-2.2017	-2.18423	0.0947235
YHR021C	RPS27B	-0.315711	-0.18673	-0.0730656	-0.62415	-1.42035	-0.716731	-2.23296	-2.15417	-1.54923	-1.50447	-0.189636
YNL167C	SKO1	-0.129307	0.0318947	-0.00171781	-2.06057	-1.26027	-0.531402	-1.8791	-1.87484	-1.93491	-1.94111	-0.0138929
YEL007W	MIT1	-0.237681	-0.0443424	0.0733429	-1.54452	-1.54235	-1.26313	-0.0681696	0.439412	0.257059	-0.468245	0.249201
YAL019W	FUN30	-0.0609262	0.215192	0.279268	-1.33959	-1.11457	-0.570288	-2.54931	-2.30642	-2.45672	-1.99801	-0.257298
YOR124C	UBP2	-0.0218286	0.168671	-0.0132808	-1.91124	-0.871048	-0.369631	-2.37361	-2.07148	-2.0475	-1.95649	0.300377
YER176W	ECM32	-0.0407802	0.0787975	0.138508	-1.00956	-0.832036	-0.398288	-2.19626	-1.73705	-2.08646	-1.78358	-0.298864
YMR149W	SWP1	-0.238683	0.239883	-0.105157	-1.58914	-1.00313	-0.823031	-2.14058	-1.98911	-1.89088	-1.83385	0.0326473
YMR064W	AEP1	0.167896	0.248199	0.247577	-1.47011	-0.819703	-0.392597	-2.12489	-2.23366	-2.11652	-2.01241	0.241645
YNL232W	CSL4	-0.137985	0.294323	0.260781	-0.763865	-1.04319	-0.602615	-3.0494	-2.44617	-2.50388	-2.37367	-0.398186
YOR004W	UTP23	0.0767938	0.0466274	0.290119	-0.902299	-1.47887	-0.915046	-2.7847	-2.53936	-2.97184	-2.3506	-1.01687
YOR315W	SFG1	-0.458664	-0.195639	-0.554543	-2.43951	-2.65119	-1.87788	-1.41202	-0.0939655	-0.239386	-0.588027	-0.780853
YDL167C	NRP1	0.10877	0.313249	0.0930085	-0.775743	-1.29237	-0.991647	-2.24377	-2.21048	-2.13832	-1.81807	-1.03953
YOR036W	PEP12	-0.143773	0.0130249	0.0222598	-1.86003	-1.03702	-0.470775	-1.83118	-1.98324	-1.77794	-1.9983	0.968788
YGL231C	EMC4	-0.175048	0.294724	0.102969	-1.03308	-0.598173	0.00105563	-1.73318	-1.95318	-1.6661	-1.88354	-0.0261923
YMR004W	MVP1	-0.242278	-0.242739	-0.0617923	-2.09391	-1.15103	-0.589198	-2.21728	-2.15079	-2.31345	-2.2676	0.144275
YGR082W	TOM20	-0.468116	0.118163	0.0444968	-1.45891	-1.44562	-1.07204	-2.59179	-2.26285	-1.79288	-2.52083	-0.0949656
YGR215W	RSM27	0.12034	0.233448	0.157908	-1.06529	-0.705947	-0.232915	-2.2945	-2.15923	-1.10406	-2.0153	0.218444
YDR177W	UBC1	0.0339033	0.293618	0.132343	-1.11829	-1.07753	-0.679724	-1.79172	-1.58157	-1.20191	-1.63902	0.554168
YKL015W	PUT3	0.000598461	0.19758	0.112238	-1.62182	-1.13045	-0.602459	-2.11723	-2.16232	-2.28691	-1.93184	-0.204645
YEL037C	RAD23	-0.177548	0.295426	0.0719754	-1.52371	-1.65637	-1.09618	-2.82656	-2.51678	-2.67029	-2.41118	-0.15963
YAL036C	RBG1	-0.0204997	0.286283	0.0742726	-0.445484	-1.11154	-0.848979	-2.44179	-2.00785	-1.83959	-1.83398	-0.716998
YLR195C	NMT1	-0.0167407	0.215267	0.137347	-1.33708	-0.799952	-0.40494	-2.60256	-2.35359	-2.10429	-2.05636	0.053942
YER164W	CHD1	-0.119374	0.309912	0.17616	-1.85726	-1.18849	-0.597389	-2.52368	-2.0882	-2.2124	-1.84904	-0.209075
YLR093C	NYV1	0.0607207	0.166654	0.0354772	-1.75602	-1.20308	-0.842392	-2.27636	-2.11657	-1.9241	-1.81055	0.418718
YLR291C	GCD7	-0.166137	0.148026	0.0328847	-1.22177	-1.18836	-1.03802	-2.21695	-2.26312	-1.76193	-2.03778	-0.372668
YML111W	BUL2	-0.0147919	-0.119716	-0.10087	-1.52157	-1.46523	-0.934293	-2.17732	-2.01292	-2.4062	-2.04761	-0.00599292
YDR162C	NBP2	0.210991	0.241083	0.410664	-1.10994	-0.487545	-0.113648	-2.25612	-2.0853	-1.88935	-2.58477	0.189736
YKL100C	YPF1	-0.169306	0.108676	-0.259748	-2.20811	-1.32752	-0.692836	-2.26103	-2.01251	-2.04985	-1.84013	0.405281
YJL060W	BNA3	-0.257776	-0.0807971	-0.45805	-0.441874	-0.48455	-0.40453	-1.04047	-1.69267	-1.39651	-1.24341	0.652033
YLR086W	SMC4	-0.184921	0.0962138	0.11463	-1.86919	-0.885478	-0.271785	-2.23177	-2.05909	-2.15414	-2.04705	-0.0147577
YNL162W	RPL42A	-0.328148	-0.192133	-0.224397	-1.12134	-1.44674	-1.25712	-2.554	-2.10409	-1.68389	-1.31905	-0.060543
YKR026C	GCN3	0.100477	0.17369	0.0779462	-1.28239	-1.53589	-0.969575	-2.57184	-2.27751	-2.3668	-2.38991	-0.346106
YAL040C	CLN3	-0.379331	-0.0605463	0.0846467	-0.990599	-0.964404	-0.745124	-0.412678	-0.146833	-0.469911	-0.785136	0.205712
YJL110C	GZF3	0.0834281	0.235176	0.115129	-1.46146	-0.959934	-0.824748	-2.26421	-2.36622	-2.42159	-2.33929	-0.117441
YOR307C	SLY41	0.0288363	0.184911	0.25147	-1.49001	-1.13299	-0.634574	-2.17337	-1.96074	-1.97049	-1.6767	-0.241022
YBR002C	RER2	0.0841282	0.2194	0.0162009	-1.4073	-1.14375	-0.892077	-2.56652	-2.48855	-2.20327	-2.46119	-0.386777
YDR423C	CAD1	-0.0190307	-0.0158443	0.124762	-1.59134	-1.08783	-0.426641	-2.61596	-2.04539	-1.79831	-1.87336	0.0282116
YIL116W	HIS5	0.173085	0.265548	0.3115	-0.589068	-0.0979871	-0.134525	-0.917851	-1.0008	-0.500675	-1.1038	0.479263
YDR505C	PSP1	-0.246897	0.144918	-0.182927	-2.33007	-1.12666	-0.75956	-2.53008	-2.34204	-2.33661	-2.35578	0.628179
YDR477W	SNF1	-0.100405	0.117853	0.0399093	-2.11366	-1.36637	-0.765548	-1.82859	-1.80876	-1.96837	-1.8118	-0.185659
YEL043W	YEL043W	-0.295458	0.0858236	0.0379672	-1.51081	-1.22775	-0.710972	-2.10559	-1.98626	-2.19294	-2.02545	-0.126929
YDL095W	PMT1	-0.217742	-0.048548	-0.231583	-1.80798	-1.86045	-1.19275	-2.3908	-1.98937	-1.85614	-1.77276	-0.114707
YPL085W	SEC16	-0.14699	0.154378	0.108058	-1.79087	-1.01342	-0.404384	-2.19193	-1.76802	-1.90283	-1.71429	-0.201595
YGL107C	RMD9	0.0293879	0.290896	0.133808	-1.56392	-1.20391	-0.84377	-1.60376	-1.79635	-1.79971	-1.62582	-0.0153187
YLR312W-A	MRPL15	-0.0387862	0.362792	0.0703237	-1.78128	-1.20956	-0.726971	-2.08043	-1.77617	-1.91833	-1.69197	-0.0215298
YNR017W	TIM23	-0.196328	0.00539422	-0.0114309	-1.31429	-1.64339	-1.19427	-3.15406	-2.31328	-2.23848	-2.60922	0.108019
YML015C	TAF11	0.0554549	0.199057	0.260991	-1.44195	-1.08362	-0.607897	-1.79296	-1.9343	-1.99393	-2.12422	-0.142252
YMR237W	BCH1	-0.147329	0.247699	0.00448389	-1.976	-1.17155	-0.551028	-2.07478	-1.87624	-1.78494	-1.5961	0.212738
YDR388W	RVS167	-0.206399	0.0139482	-0.124316	-1.91688	-1.35791	-0.821963	-2.34294	-1.56274	-1.78047	-1.80112	0.417265
YGR123C	PPT1	-0.130731	0.0146533	0.00587036	-1.46819	-1.50909	-0.980732	-3.17387	-2.61086	-2.58468	-2.37142	-1.06604
YNL300W	TOS6	-1.94319	-1.60598	-1.91083	-3.3502	-2.67416	-1.48427	-0.502951	-0.266961	-0.00296089	-0.733835	0.145572
YDR331W	GPI8	-0.166779	0.129937	0.118913	-1.83148	-1.1591	-0.526975	-2.10189	-2.05627	-2.02812	-2.03705	-0.566922
YKR062W	TFA2	-0.0360504	0.0619675	0.0223215	-1.12987	-0.917574	-0.402124	-1.79782	-1.00914	-1.00741	-1.27425	0.224228
YPL084W	BRO1	0.0907587	0.214988	0.147522	-1.89034	-0.650673	-0.296756	-2.62218	-2.10843	-2.16949	-2.32797	-0.014348
YPL183C	RTT10	0.0529612	0.165572	0.0149009	-1.13573	-1.35933	-0.916665	-2.72584	-2.49473	-2.54422	-1.99215	-0.72478
YGL082W	YGL082W	-0.163099	-0.0840975	-0.264013	-2.01293	-1.29738	-0.758414	-2.0856	-2.17382	-2.331	-2.04052	0.00694923
YDR389W	SAC7	-0.232004	0.13492	0.055365	-1.33599	-0.996366	-0.428391	-2.03584	-1.85846	-1.86861	-1.79524	-0.196174
YNL188W	KAR1	-0.155208	0.0707465	0.246667	-1.54503	-1.05843	-0.714286	-2.35974	-2.2716	-2.30859	-2.50286	-0.417776
YBR080C	SEC18	-0.132666	0.0714933	-0.168534	-1.63472	-1.03409	-0.456099	-2.60435	-2.00937	-2.14773	-2.0102	0.0485303
YIR006C	PAN1	-0.279019	0.060999	-0.107342	-2.07565	-1.24905	-0.576137	-2.32749	-1.84155	-2.17132	-1.83453	-0.0453907
YGR274C	TAF1	-0.105062	0.0754385	0.0985867	-1.62205	-0.954904	-0.375182	-2.03035	-1.91257	-2.16285	-1.79839	-0.278432
YBR187W	GDT1	-0.322445	-0.146642	-0.275859	-1.21561	-1.43777	-1.00912	-2.95859	-2.62751	-2.31069	-2.92007	-0.691031
YPL143W	RPL33A	-0.204259	-0.172685	-0.339451	-0.998501	-1.58534	-1.19429	-2.3855	-1.76676	-1.14774	-1.21821	-0.354044
YHR030C	SLT2	-0.101495	0.03117	-0.173775	-1.35034	-1.61226	-1.39387	-1.72263	-1.44551	-1.7167	-1.72356	1.08903
YMR077C	VPS20	0.114946	0.209612	0.349169	-1.35239	-0.447216	-0.0901701	-2.08743	-2.07141	-2.3397	-1.92405	0.0203152
YPR189W	SKI3	-0.133281	0.10597	0.028019	-1.60607	-1.02778	-0.466767	-2.38277	-1.87801	-1.91937	-1.86547	-0.00656522
YMR024W	MRPL3	-0.0793449	0.282478	0.0623318	-1.71191	-1.30178	-0.841413	-1.58513	-1.75498	-1.86681	-1.79682	0.24777
YJL044C	GYP6	-0.0421886	0.238933	0.181006	-1.58312	-0.812884	-0.358183	-3.05999	-2.76555	-2.69549	-2.4413	-0.00741631
YDL240W	LRG1	-0.148753	0.0606109	-0.179485	-1.80202	-1.10357	-0.556714	-2.08246	-1.96444	-2.25861	-2.11527	-0.28886
YML062C	MFT1	0.115538	0.345788	0.252915	-1.30459	-0.694332	-0.0886879	-1.91521	-1.78622	-1.91205	-1.86198	-0.0755146
YLR274W	MCM5	-0.0952305	0.126591	-0.00565483	-1.44042	-0.905356	-0.554378	-2.24726	-2.04768	-2.24612	-1.86026	-0.0335393
YER080W	AIM9	-0.098398	-0.0538281	-0.0877767	-1.91554	-1.33315	-0.81867	-2.71752	-2.31647	-2.53714	-2.00579	0.188641
YOR001W	RRP6	-0.0823616	0.260942	0.198715	-1.45159	-1.08986	-0.635802	-2.44393	-2.18132	-2.30232	-1.98425	-0.724098
YKL126W	YPK1	-0.330253	-0.065124	-0.22932	-2.40658	-1.46028	-0.916611	-1.93491	-2.13241	-2.08573	-1.77155	0.544808
YMR099C	YMR099C	-0.0313727	0.319717	-0.0153728	-1.31548	-0.510702	-0.146476	-2.47865	-1.615	-1.89127	-1.30214	0.252232
YDR116C	MRPL1	-0.0703925	0.209099	0.173917	-1.8258	-1.36061	-0.93137	-2.60706	-2.30286	-2.00111	-2.52497	0.0978863
YLR298C	YHC1	-0.147229	-0.0435101	0.296127	-1.65675	-0.787502	-0.447088	-2.42257	-2.2008	-1.86378	-2.76852	0.0690425
YBL061C	SKT5	-0.211313	0.0443839	-0.099042	-1.15441	-1.6599	-1.3696	-1.66159	-1.7613	-1.9923	-1.76817	-0.282781
YLR332W	MID2	-0.479827	-0.329998	-0.337824	-1.17468	-1.40484	-1.10134	-1.85901	-1.82783	-1.92676	-1.70949	0.0590915
YDR398W	UTP5	-0.111988	0.0889244	0.145108	-0.747397	-1.63865	-1.32132	-2.48569	-2.46695	-2.42092	-2.29896	-0.762535
YMR128W	ECM16	-0.00857522	0.306558	0.363697	-1.27761	-1.43732	-0.722423	-2.55736	-2.31013	-2.35281	-1.9216	-0.838645
YGR250C	YGR250C	-0.231411	-0.329371	-1.06317	-2.36119	-0.859612	-0.674044	-1.44953	-1.07787	-1.20961	-1.70916	0.795183
YOR234C	RPL33B	-0.183207	-0.0562858	-0.239266	-0.88752	-1.5248	-1.17016	-2.36057	-2.20342	-1.70675	-1.57945	-0.717157
YKR089C	TGL4	-0.251463	0.00489158	-0.270304	-2.01637	-1.18171	-0.680013	-1.56781	-1.51365	-1.702	-1.7901	0.710732
YPR119W	CLB2	-0.271374	0.0603222	-0.124691	-2.30042	-2.04501	-1.18246	-1.47781	-0.809897	-0.864742	-1.18531	-0.486242
YPR004C	AIM45	-0.438853	0.00957584	-0.145376	-1.67149	-1.15686	-0.813383	-2.50235	-2.49335	-1.88827	-2.35524	0.4999
YIL127C	RRT14	0.233955	0.0952283	0.465907	-0.854534	-1.40018	-0.692216	-2.31165	-1.65493	-1.80702	-1.91801	-0.894991
YLR079W	SIC1	-0.383132	-0.210443	-0.0405513	-2.04385	-1.66826	-1.18533	-1.12423	-0.686756	-0.974749	-1.08211	0.26778
YIR004W	DJP1	-0.0291458	0.252565	0.278561	-1.50536	-0.950252	-0.265408	-2.03857	-1.8731	-1.98557	-2.05855	-0.0174518
YOR316C	COT1	-0.616353	-0.356046	-0.142513	-1.04699	-1.28565	-1.25151	-1.8608	-1.45199	-1.63674	-1.48196	0.445681
YPR161C	SGV1	-0.0872234	0.126469	0.126927	-1.68099	-1.26245	-0.663175	-2.33193	-2.12158	-2.05925	-2.089	-0.144977
YLL014W	EMC6	0.0880248	0.284811	0.11001	-1.40694	-0.890293	-0.44043	-2.65963	-1.80313	-1.55021	-1.81062	-0.233259
YNL256W	FOL1	-0.354766	-0.405314	-0.102694	-1.7265	-1.77672	-1.36412	-2.04498	-2.36824	-2.25259	-1.93164	-0.837733
YNL139C	THO2	-0.0602329	0.125107	0.0272527	-1.81875	-0.950347	-0.450737	-2.19608	-1.90825	-1.97512	-1.71024	-0.178921
YOR340C	RPA43	-0.100036	0.358395	0.233779	-1.03178	-1.46844	-1.18299	-2.36774	-2.16282	-2.15233	-2.16713	-0.786849
YNL306W	MRPS18	-0.310908	0.188205	-0.0386399	-1.59094	-1.24732	-0.831738	-2.38433	-2.30439	-2.15443	-2.01886	0.429593
YDR313C	PIB1	-0.308374	-0.0160341	-0.113661	-1.67443	-0.961762	-0.571998	-2.17797	-2.11097	-2.37597	-2.12808	0.460586
YEL052W	AFG1	-0.16618	-0.142258	-0.12092	-1.20928	-0.876402	-0.74568	-0.921742	-1.54349	-1.37339	-1.64968	0.130639
YOR056C	NOB1	-0.120749	0.19948	0.26615	-0.697839	-1.42238	-0.790936	-2.4848	-2.35944	-2.58773	-2.12769	-0.546251
YGL194C	HOS2	0.0903956	0.131087	0.293675	-1.44443	-0.861022	-0.193127	-1.2983	-1.60493	-1.71082	-1.39736	0.0691179
YOR101W	RAS1	-0.435885	-0.558775	-0.598439	-1.44033	-2.47432	-1.88644	-4.47658	-2.76901	-2.6651	-2.60364	-0.826256
YKR096W	ESL2	-0.0500219	0.0874655	0.0327571	-1.60119	-0.688718	-0.245684	-2.15879	-2.2993	-2.40768	-2.05211	0.348161
YKL109W	HAP4	-0.717056	0.047697	-0.626925	-2.41434	-2.0924	-1.37653	0.683254	0.336219	-0.082927	-0.268387	1.43055
YLR275W	SMD2	0.328193	0.248711	0.269649	-0.631873	-0.269499	-0.355782	-2.53583	-1.76901	-1.99449	-2.22103	-0.103506
YGL020C	GET1	0.0484574	0.157609	0.226956	-1.51658	-1.13125	-0.804243	-1.89823	-1.99026	-1.59458	-1.73917	-0.179129
YML105C	SEC65	-0.420033	0.168202	0.0345368	-1.6751	-0.935221	-0.633414	-2.56532	-2.24459	-2.15813	-1.89548	-0.274312
YOR030W	DFG16	-0.0390134	0.0135458	0.091851	-1.67792	-0.931789	-0.650668	-1.67615	-1.4723	-1.52663	-1.5805	-0.0565208
YKL049C	CSE4	-0.103665	0.0695935	0.201877	-1.38184	-0.892648	-0.212851	-2.18657	-2.21204	-2.16788	-2.42837	0.100496
YLR412W	BER1	-0.0118759	0.140771	0.131309	-1.055	-0.631543	-0.180985	-2.17175	-1.9207	-2.50034	-1.82669	-0.17977
YLR301W	HRI1	-0.35404	0.00895021	-0.126335	-1.80288	-1.12569	-0.846982	-3.04559	-2.04583	-1.51831	-1.30745	0.0760913
YLR305C	STT4	-0.170653	0.0778194	-0.0221559	-1.79322	-1.17197	-0.720815	-2.70112	-2.42617	-2.48339	-2.06719	-0.0996228
YOR322C	LDB19	-0.150464	0.211443	0.197288	-1.42706	-0.826594	-0.514501	-1.79802	-1.8576	-1.99612	-1.57279	-0.114065
YMR298W	LIP1	-0.53481	-0.357641	-0.653688	-2.02386	-1.50382	-1.36766	-2.48338	-2.28001	-2.02534	-1.88687	0.149634
YDR184C	ATC1	0.208808	0.295446	0.21765	-0.907675	-1.55619	-1.14949	-2.67435	-2.75257	-2.7176	-2.38779	-0.771241
YDL037C	BSC1	-1.24034	-1.49038	-0.95202	-4.14726	-5.66724	-6.04493	-1.00052	-0.65232	-0.70705	-0.941385	-0.640124
YNL201C	PSY2	-0.163204	0.0563002	-0.109506	-1.15699	-1.46096	-0.963025	-2.39128	-2.36845	-2.4678	-2.2364	-0.161676
YHR107C	CDC12	-0.46613	-0.0561052	-0.0966977	-1.69258	-1.3429	-0.948502	-2.35947	-1.93415	-2.24245	-1.93748	-0.00888282
YGR251W	NOP19	0.116736	0.229217	0.266828	-0.38366	-0.711995	-0.529453	-2.57548	-2.25582	-2.84115	-2.28959	-0.654587
YDR141C	DOP1	-0.107174	0.166304	0.0864972	-1.62115	-0.968939	-0.520344	-2.25611	-2.03613	-2.05599	-1.80003	0.183693
YHR009C	TDA3	-0.0997305	0.0431558	-0.197692	-1.70425	-1.3709	-0.895925	-2.59681	-2.37859	-2.4368	-2.21777	0.363225
YDL060W	TSR1	0.032449	0.360682	0.251343	-0.765242	-1.48935	-0.860335	-2.58932	-2.34432	-2.43064	-2.15561	-0.803922
YNL081C	SWS2	-0.0788794	0.361959	0.145274	-1.11037	-0.741948	-0.407269	-2.35661	-2.45995	-1.4853	-2.28837	0.0998336
YCL010C	SGF29	-0.207757	0.147082	0.12087	-1.62163	-0.983419	-0.553857	-2.68433	-2.13837	-2.44313	-2.066	-0.156468
YMR272C	SCS7	-0.440468	-0.113401	-0.367455	-2.26937	-1.65328	-1.54283	-2.00851	-0.876576	-0.886548	-1.20579	0.309783
YER178W	PDA1	-0.236326	0.13057	-0.254921	-1.14593	-1.1612	-0.864998	-2.30557	-1.56702	-1.47783	-1.20207	0.590029
YLR363C	NMD4	0.16101	0.0703778	0.0827685	-1.44839	-0.342623	-0.19367	-2.11008	-1.88381	-1.90816	-1.80509	-0.0610293
YIR018W	YAP5	-0.252927	-0.0911721	0.34965	-0.224898	-0.833046	-0.918992	-2.1428	-2.32384	-2.01494	-2.20025	0.172096
YGL056C	SDS23	-0.185503	0.13273	0.120136	-0.791772	-1.62544	-1.12154	-2.21204	-2.23407	-2.08534	-2.05618	-0.212582
YNL075W	IMP4	0.204581	0.344063	0.43976	-0.56757	-1.09142	-0.763806	-2.56678	-2.40753	-2.16748	-1.98034	-0.784702
YDR120C	TRM1	0.00400788	0.424323	0.187383	-0.742002	-1.12938	-0.655154	-2.64315	-2.58278	-2.36364	-2.16796	-0.708939
YGL171W	ROK1	-0.0666183	0.334368	0.206888	-0.96287	-1.4647	-0.942382	-2.76961	-2.38174	-2.60099	-2.17429	-0.999186
YDR373W	FRQ1	0.0100218	0.0115986	0.047228	-1.08472	-0.795103	-0.593843	-2.56171	-2.19882	-1.70471	-1.74071	0.39008
YKL211C	TRP3	-0.0711869	0.301807	0.144139	-0.567715	-0.709999	-0.47523	-2.40112	-1.85023	-1.76519	-1.65663	-0.0224975
YDL207W	GLE1	-0.0735772	0.122365	0.1849	-1.51275	-0.926301	-0.275746	-1.85418	-1.88063	-1.75879	-1.83963	-0.221439
YLR401C	DUS3	-0.0959843	0.240781	0.197095	-0.864144	-1.31184	-0.773674	-3.10263	-2.60812	-2.47047	-2.14415	-0.68501
YLR321C	SFH1	-0.0415543	0.189103	0.157234	-1.53895	-1.10005	-0.459643	-2.17194	-2.07495	-2.09826	-2.08283	-0.223452
YLR038C	COX12	0.309687	0.26715	-0.0527467	-1.02523	-0.165327	0.108203	-1.90902	-1.64442	-1.60886	-1.67925	0.972918
YNR047W	FPK1	-0.0618681	0.0841817	-0.0551002	-1.66428	-0.823539	-0.393416	-1.82372	-1.89148	-1.99701	-1.94964	0.330609
YLR185W	RPL37A	-0.193249	0.0119341	-0.261061	-1.1339	-1.30211	-0.925466	-2.90537	-1.74777	-1.20417	-1.45758	-0.357031
YDR232W	HEM1	-0.331378	0.111315	-0.141632	-1.0636	-1.31994	-0.871164	-2.26905	-2.08848	-2.35445	-1.933	-0.300217
YOR075W	UFE1	-0.140935	0.116593	0.343359	-1.81733	-0.82269	-0.257882	-1.91742	-1.57579	-1.97428	-1.85814	0.183
YMR314W	PRE5	-0.076131	0.293893	-0.654179	-1.42679	-1.31562	-1.28423	-2.44725	-2.17996	-1.50396	-1.68273	0.096128
YBL103C	RTG3	0.0475207	0.2041	0.313244	-1.24543	-0.710322	-0.507045	-1.69791	-1.5376	-1.82618	-1.43987	0.153336
YDR464W	SPP41	-0.128904	0.102769	0.166386	-1.81372	-1.0952	-0.512442	-2.4693	-2.21545	-2.44173	-2.26064	-0.299286
YNL301C	RPL18B	-0.187521	0.253628	0.108366	-1.14747	-1.41186	-0.874957	-0.91716	-1.18764	-0.911488	-0.740132	-0.477242
YPR042C	PUF2	-0.0901322	0.171744	0.000578189	-1.72474	-1.04607	-0.783393	-1.59009	-1.30274	-1.378	-1.43522	-0.0847808
YDR041W	RSM10	-0.120542	-0.00729339	-0.0619566	-1.28478	-0.8709	-0.641016	-2.27813	-2.57438	-2.12542	-2.36752	0.308313
YBR245C	ISW1	-0.202944	0.139636	0.0410157	-1.84628	-1.16926	-0.477108	-2.48845	-2.35947	-2.49533	-2.10701	-0.436503
YDR138W	HPR1	0.187417	0.3473	0.34787	-1.19027	-0.898981	-0.567525	-1.90338	-1.74073	-1.99253	-1.71808	-0.242542
YJL096W	MRPL49	0.0370576	0.129568	0.146886	-1.56678	-1.15695	-0.904873	-2.27668	-2.18129	-1.87164	-2.03229	0.0873359
YIL062C	ARC15	0.00565444	0.260443	-0.105949	-1.88064	-1.55686	-1.0561	-2.46436	-2.1182	-2.0333	-2.16963	0.612266
YDL135C	RDI1	0.0458849	0.211648	0.133342	-0.956516	-0.310454	-0.209734	-1.98209	-2.07638	-1.7692	-1.65421	0.140886
YIL084C	SDS3	-0.054359	0.125408	0.0176335	-1.61747	-0.955871	-0.510835	-2.19683	-2.19667	-2.28555	-1.96601	-0.026276
YNL161W	CBK1	-0.0385528	0.340554	0.266206	-1.1824	-0.839098	-0.352647	-1.79875	-1.79102	-1.85673	-1.87946	0.113709
YDR458C	HEH2	0.0643861	0.243831	0.0858406	-1.52812	-0.553556	-0.219069	-2.26434	-2.1575	-2.21256	-2.0713	-0.104295
YML092C	PRE8	-0.366892	0.0169389	-0.468403	-1.09331	-1.67333	-1.09446	-2.20174	-2.43936	-1.85708	-2.10802	0.21517
YHR013C	ARD1	-0.221346	0.0869755	-0.0676825	-1.46891	-1.44773	-0.981332	-2.40338	-2.21339	-1.70452	-2.46712	-0.140816
YGL148W	ARO2	-0.187511	0.0954462	-0.178238	-1.03334	-1.64876	-1.34798	-2.4917	-1.92578	-1.60394	-1.57277	-0.45639
YGL055W	OLE1	-1.17984	-1.57365	-0.282877	-1.75777	-1.33374	-0.736622	-2.02113	-0.22729	-0.0185375	-0.539055	-0.177614
YDR001C	NTH1	-0.621599	-0.586409	-0.860761	-2.27961	-1.46568	-1.35884	-0.37031	-0.51603	-0.633078	-0.84123	1.70463
YOR095C	RKI1	-0.130588	-0.199969	-0.1604	-0.953057	-1.90386	-1.48352	-3.52837	-2.49688	-2.43742	-2.01304	-1.39575
YGR074W	SMD1	-0.0985561	-0.00825077	0.0507987	-1.43017	-0.753294	-0.34487	-2.22677	-1.96461	-1.73948	-2.38095	-0.418901
YJL129C	TRK1	-0.106723	0.105772	-0.117749	-1.54605	-1.27827	-0.805826	-1.81119	-1.94446	-2.06556	-1.8002	-0.13761
YHR090C	YNG2	0.0694047	0.168356	0.263348	-1.44614	-0.744026	-0.191762	-1.75567	-1.83573	-1.97723	-2.01575	0.30584
YHR152W	SPO12	-0.502871	-0.232995	-0.163755	-1.49643	-1.56011	-0.644468	-3.27535	-2.62167	-2.50792	-2.81764	0.44523
YGL039W	YGL039W	-0.0679496	-0.304983	-0.00461518	-0.478115	0.196352	0.54415	-3.28913	-2.23577	-1.73882	-2.14163	-0.347398
YKL099C	UTP11	0.0210008	0.406373	0.238768	-0.994628	-1.25294	-0.840733	-2.65835	-2.57936	-2.54777	-2.14567	-0.747872
YOL030W	GAS5	-0.192519	0.130283	-0.184541	-1.4137	-1.07881	-0.56904	-1.2245	-1.33653	-1.17288	-1.12284	0.283162
YIL031W	ULP2	-0.167072	0.0566119	0.131189	-2.16089	-0.90468	-0.450661	-1.84806	-1.74729	-2.0563	-1.64766	0.0732056
YBR058C-A	TSC3	-0.498504	0.295279	-0.124098	-1.39797	-1.04576	-0.575089	-2.4509	-2.52894	-1.51792	-1.62468	0.0539359
YPL211W	NIP7	0.348363	0.360121	0.0140373	-0.932306	-1.38565	-1.0867	-2.55131	-2.36033	-1.90165	-2.09634	-0.893696
YLR114C	AVL9	-0.133596	0.1937	0.141501	-1.83736	-0.90686	-0.319498	-2.37231	-2.06648	-2.20274	-1.85113	-0.0894434
YHR123W	EPT1	-0.570697	-0.348223	-0.288255	-2.74292	-1.83494	-1.10996	-2.78265	-2.60961	-2.29492	-2.19943	-0.290124
YOR272W	YTM1	-0.194252	0.284444	0.173902	-0.910639	-1.4274	-0.950549	-2.58453	-2.64018	-2.22632	-2.09798	-0.870344
YPR025C	CCL1	-0.0500836	0.287877	0.261322	-1.14105	-0.931048	-0.612921	-1.75908	-1.92193	-1.72168	-1.99471	-0.135052
YBL033C	RIB1	-0.589324	-0.64621	-0.734146	-1.74338	-1.94305	-1.72	-1.0108	-0.868269	-0.65868	-1.08923	0.083442
YGR261C	APL6	-0.118928	0.23	0.173484	-1.76366	-0.703906	-0.185909	-2.39354	-2.18194	-2.20092	-2.03965	-0.266901
YLR045C	STU2	-0.395534	-0.0386207	-0.227264	-2.34812	-1.43887	-0.660861	-2.24234	-2.27003	-2.22616	-2.12147	-0.0974923
YDR161W	YDR161W	0.0482507	0.362345	0.230024	-0.702471	-1.38535	-1.03349	-2.93781	-2.43095	-2.47076	-2.32166	-0.86658
YKR056W	TRM2	0.045949	0.294453	0.431237	-0.634672	-1.1131	-0.744334	-2.25283	-2.36049	-2.23108	-1.95718	-0.793484
YDR189W	SLY1	-0.158903	0.125277	-0.0105018	-1.69464	-1.17162	-0.63503	-2.39136	-1.92879	-2.0371	-2.14524	-0.131001
YBR151W	APD1	-0.103232	-0.0743494	-0.202718	-1.60988	-1.08114	-0.769565	-2.13275	-2.00969	-1.70528	-1.95981	0.335666
YNR074C	AIF1	-0.302356	0.00664148	-0.177538	-1.22462	-1.53032	-1.47904	-1.35841	-1.29624	-0.824659	-1.46349	-0.500644
YKL167C	MRP49	-0.281723	-0.047771	0.201508	-1.73367	-0.998683	-0.744446	-1.8426	-2.38131	-2.12533	-2.24282	0.152009
YIL129C	TAO3	-0.0908578	0.122894	0.0572004	-1.54817	-0.889172	-0.358365	-1.74919	-1.63818	-1.79067	-1.59815	0.213495
YDR454C	GUK1	-0.254892	0.135257	-0.308296	-1.23516	-1.15189	-0.783535	-2.24961	-1.97521	-1.36366	-1.14997	-0.316454
YDL027C	YDL027C	-0.0607197	-0.0154489	0.0121215	-2.51251	-0.448759	-0.205475	-1.80937	-1.95467	-2.17724	-2.18327	1.10841
YBR166C	TYR1	0.00357419	0.256466	0.0639406	-0.87933	-0.905294	-0.493323	-2.36217	-1.91438	-2.00219	-1.79512	-0.146499
YGL200C	EMP24	-0.140057	0.066993	-0.164487	-1.77218	-1.25137	-0.826742	-2.5181	-2.22221	-1.47739	-1.70252	0.289698
YOL158C	ENB1	-1.30005	-0.455043	-0.207598	-0.653455	-2.20744	-2.03802	-2.05273	-1.171	-1.07498	-1.64638	-0.547447
YDR297W	SUR2	-0.409657	-0.527155	-0.428994	-2.28115	-1.40282	-1.40519	-2.73733	-1.47811	-1.4923	-1.54457	-0.38183
YGL187C	COX4	-0.145284	0.157771	-0.393602	-1.35413	-0.417874	0.0723217	-1.77207	-1.72375	-1.21819	-1.67439	0.616275
YDR301W	CFT1	-0.079096	0.135293	0.0321096	-1.66814	-0.899413	-0.406465	-2.12277	-2.08067	-2.12927	-1.61525	-0.107161
YGR084C	MRP13	0.0450352	0.246929	0.0501265	-1.67731	-1.46066	-0.898411	-1.7428	-1.7174	-1.48183	-1.76039	0.112113
YHR197W	RIX1	0.128429	0.316128	0.381757	-0.688933	-1.40725	-0.943682	-2.1636	-2.31939	-2.13405	-1.77347	-1.07596
YNR053C	NOG2	0.0528261	0.19167	-0.0851211	-0.105503	-1.3438	-1.11544	-1.60293	-1.70978	-1.64201	-1.52451	-0.810108
YGR008C	STF2	-0.397659	-0.92521	-1.08557	-3.1422	-0.893028	-1.20008	-0.948995	0.04535	-0.187572	-1.00163	3.17264
YKR030W	GMH1	0.0574312	0.184316	0.0117166	-1.26553	-0.784028	-0.563523	-2.36836	-2.25998	-2.30552	-2.0788	0.0228012
YLR254C	NDL1	0.17351	0.117927	0.560931	-1.25714	-0.618552	-0.535185	-2.58019	-0.851465	-1.26168	-1.82505	0.474403
YDR017C	KCS1	-0.098993	0.240746	0.135957	-2.15508	-1.64702	-1.08882	-2.66719	-2.64565	-2.42737	-2.1581	0.0120808
YGL094C	PAN2	-0.383695	-0.0507299	-0.140982	-1.9996	-1.27752	-0.738364	-2.21146	-2.09577	-2.13383	-2.03088	-0.0829156
YNL261W	ORC5	-0.0765798	-0.130776	-0.197781	-1.11797	-1.2676	-0.786079	-1.70731	-1.56594	-1.39691	-1.38317	-0.325352
YBR281C	DUG2	-0.268072	-0.0334422	-0.209503	-0.829103	-0.898865	-0.512283	-2.38159	-2.35145	-2.14694	-2.02112	-0.274793
YLR166C	SEC10	0.00755135	0.0918965	0.0449978	-1.83825	-0.809095	-0.484926	-2.32439	-2.10567	-2.21735	-2.09445	0.267687
YEL056W	HAT2	-0.154608	0.0834373	-0.172018	-1.53857	-1.19088	-0.756874	-2.05175	-1.80082	-1.81338	-1.60463	-0.190534
YJL165C	HAL5	-0.0905183	0.148657	-0.0336377	-1.906	-1.25004	-0.997089	-1.96191	-1.99508	-2.00026	-1.97794	0.459799
YOR109W	INP53	-0.0509063	0.184555	-0.0669963	-1.7853	-1.2207	-0.816768	-2.3783	-2.12469	-2.23188	-1.9708	-0.0680767
YJL005W	CYR1	-0.272489	-0.02727	-0.291161	-2.68475	-1.01115	-0.622834	-2.82348	-2.66087	-2.5938	-2.2858	0.619445
YPL020C	ULP1	-0.105991	0.124754	0.227759	-1.24259	-0.632167	-0.040041	-2.26669	-2.00488	-2.05737	-1.93183	0.206406
YMR001C	CDC5	-0.190622	0.127449	0.0401031	-1.76028	-1.28884	-0.756699	-1.39216	-1.81933	-1.77705	-1.30879	-0.0199715
YOR035C	SHE4	-0.108999	0.0934199	0.116017	-1.96967	-0.873576	-0.511573	-2.12717	-1.94637	-2.05283	-1.8511	0.372264
YCL045C	EMC1	-0.127245	0.239647	-0.0165188	-1.6846	-1.01233	-0.486043	-2.10458	-1.78511	-1.77326	-1.61622	-0.0663557
YKL186C	MTR2	-0.149562	0.187802	0.308268	-0.984872	-1.06954	-0.34427	-2.53484	-2.12785	-2.09579	-2.1872	-0.0316132
YPL070W	MUK1	0.0168905	-0.0858266	-0.00217293	-1.70822	-0.722006	-0.33438	-2.63141	-2.75923	-2.55023	-2.33872	0.190951
YKR002W	PAP1	-0.242203	0.0749895	0.0323734	-1.84001	-0.99269	-0.535899	-2.25688	-2.14279	-2.35702	-2.12601	0.0533453
YBR267W	REI1	0.0515449	0.278345	0.171918	-0.774373	-1.47085	-1.1162	-2.93303	-2.62924	-2.67853	-2.73962	-1.10437
YBL078C	ATG8	-0.156126	0.0462711	0.346545	-2.49118	-0.731424	-0.379249	-1.68558	-1.94467	-1.53791	-1.96344	0.942186
YER175C	TMT1	-0.407494	-0.423151	-0.0772701	1.05608	-0.730368	-1.08263	-2.28431	-0.810427	-0.901326	-0.888539	0.559144
YNL027W	CRZ1	-0.0940466	0.0768441	0.242158	-1.73809	-0.937421	-0.443648	-1.96768	-2.21497	-2.36226	-2.09367	0.00405059
YKR018C	YKR018C	-0.0214763	0.09789	-0.165783	-1.64079	-0.945287	-0.510506	-2.47421	-2.39273	-2.29657	-2.16551	0.344036
YIL026C	IRR1	-0.300718	0.0540045	-0.0261668	-2.09328	-1.2062	-0.581921	-2.62971	-2.43211	-2.34747	-2.24474	0.0666732
YBL045C	COR1	-0.136787	0.154496	-0.415873	-2.22585	-0.895739	-0.47724	-1.71112	-1.39794	-1.49801	-1.01898	0.84785
YOR160W	MTR10	-0.128128	0.0672255	-0.0428895	-1.85713	-1.36502	-0.755856	-2.18677	-1.90834	-2.04359	-1.87456	-0.313853
YJR050W	ISY1	0.211259	-0.0190682	0.231242	-1.28773	-0.689109	-0.184175	-3.12482	-2.52701	-2.44754	-2.96712	-0.0153944
YJL197W	UBP12	-0.0890707	0.140792	0.0141202	-1.91721	-1.3612	-0.748943	-2.71813	-2.28223	-2.40882	-2.22766	-0.343654
YGR208W	SER2	-0.199287	0.0537497	-0.171091	-1.31956	-1.31956	-0.852356	-2.45218	-2.52299	-2.216	-2.4156	-0.624704
YCL057W	PRD1	-0.163401	0.011768	-0.373966	-1.81208	-1.31205	-0.776659	-2.0617	-1.96177	-1.72838	-1.82692	0.575605
YKL130C	SHE2	-0.315404	0.0252668	-0.166783	-1.92638	-1.37943	-0.767365	-2.49485	-2.68439	-2.42999	-2.45163	-0.129214
YER100W	UBC6	-0.0870127	0.464105	0.103292	-1.28842	-1.0066	-0.463963	-2.43665	-2.12852	-1.70929	-2.23377	0.194052
YER035W	EDC2	-0.216313	-0.49741	-0.386425	-3.2032	-2.84409	-2.4364	-1.03387	-1.488	-0.410602	-1.62124	1.62459
YGR038W	ORM1	0.131056	0.0183348	0.195018	-1.80187	-1.34938	-0.786657	-1.66983	-1.82456	-1.08688	-1.95286	-0.0181039
YNL090W	RHO2	-0.0334478	0.20037	0.288338	-1.76587	-1.24768	-0.723939	-2.35047	-1.93674	-1.78516	-1.9405	-0.0314087
YPR104C	FHL1	-0.00890934	0.135576	0.141141	-1.9294	-1.30083	-0.723349	-1.90729	-2.06389	-2.32399	-2.11351	-0.238554
YLR186W	EMG1	-0.196229	0.184639	0.0783759	-0.883049	-1.32867	-0.79617	-2.09577	-1.87909	-1.75041	-2.2758	-0.546524
YMR300C	ADE4	-0.161866	0.0360199	-0.062439	-1.08892	-0.970649	-0.597915	-2.37677	-2.46583	-2.22102	-2.22775	-0.514558
YHR073W	OSH3	-0.0867468	0.175658	-0.0363769	-1.37155	-1.0498	-0.659628	-2.38448	-2.19995	-2.16098	-2.04148	-0.103277
YBR155W	CNS1	-0.200472	0.106513	0.0371726	-0.416298	-1.53062	-1.25451	-3.06536	-2.75073	-2.58421	-2.51208	-0.74166
YOL133W	HRT1	-0.269616	-0.0290777	-0.169094	-1.04124	-0.807635	-0.401342	-2.34167	-1.73804	-2.48107	-2.17606	0.0677858
YFL007W	BLM10	-0.152115	0.0790224	-0.135544	-1.69128	-1.39421	-0.848726	-1.9961	-2.10544	-2.22731	-1.78685	-0.0494498
YGL040C	HEM2	-0.0479479	-0.0792652	-0.148379	-1.26696	-1.05483	-0.521803	-2.57108	-2.24972	-2.39727	-1.87107	-0.109777
YPR020W	ATP20	0.238719	0.394218	0.171893	-0.971576	-0.226483	0.00114792	-2.19056	-1.66604	-1.25937	-1.74239	0.432082
YOR091W	TMA46	-0.337144	0.20707	0.0744357	-1.16804	-1.613	-1.006	-2.62513	-2.21266	-2.49801	-2.266	-0.85088
YOR108W	LEU9	-0.10195	0.438037	-0.0566742	-0.55133	-1.18263	-0.841478	-1.97536	-1.50404	-1.1937	-1.41356	-1.32208
YBR212W	NGR1	-0.248697	-0.0237731	-0.227507	-1.739	-0.956899	-0.415473	-1.76037	-2.22237	-2.13955	-2.17617	0.408373
YOR217W	RFC1	-0.307038	0.177554	-0.0724626	-1.65673	-1.13648	-0.496298	-2.54316	-2.32392	-2.26246	-2.17728	-0.468154
YER146W	LSM5	-0.570401	0.0202627	0.12105	-0.47855	-1.35316	-0.711883	-3.13916	-2.16114	-2.30065	-2.50481	-0.328203
YPL057C	SUR1	-1.0042	-0.839315	-0.521053	-2.45155	-2.64923	-2.26874	-0.680128	-0.671563	-0.587045	-1.16471	0.517531
YAL059W	ECM1	-0.107891	0.408644	0.0454595	-0.861203	-1.48491	-0.948115	-3.28071	-2.54574	-2.72465	-2.05811	-1.23473
YOR132W	VPS17	-0.198452	-0.0227504	0.018992	-2.05748	-1.11115	-0.617679	-2.42539	-1.95605	-2.25331	-2.13987	0.364475
YJR010C-A	SPC1	-0.125964	-0.217417	0.0753249	-1.69998	-1.04054	-0.504595	-2.55825	-2.31043	-2.44811	-1.32981	-0.121613
YDL056W	MBP1	-0.160616	0.229298	0.119401	-1.73339	-1.20966	-0.50251	-1.87767	-1.76826	-2.26526	-2.01749	0.21307
YGR252W	GCN5	-0.210296	0.134464	0.116375	-1.87127	-0.884746	-0.340456	-2.42133	-2.11411	-2.09443	-2.14428	-0.0885962
YPL242C	IQG1	-0.161386	-0.00974983	0.0218063	-2.1758	-1.17469	-0.563056	-2.42916	-2.14395	-2.14878	-1.90045	0.323505
YJR011C	YJR011C	-0.166048	-0.13881	0.148197	-2.01211	-0.647628	-0.494875	-2.50762	-2.92112	-3.09931	-2.69358	-0.352046
YKL128C	PMU1	-0.337197	-0.275181	-0.429312	-1.60964	-1.82714	-1.62675	-3.09111	-2.24127	-2.29983	-2.1785	-0.31394
YCR067C	SED4	-0.280455	0.155852	0.0640275	-1.7645	-0.959657	-0.377942	-2.0148	-1.88685	-2.11166	-1.96961	-0.0228704
YLR429W	CRN1	-0.171984	0.105569	0.114884	-1.63006	-1.08953	-0.588803	-2.53954	-1.89383	-1.80371	-1.91472	0.310402
YJL033W	HCA4	0.191824	0.482366	0.573448	-0.612615	-1.30903	-0.753227	-2.52421	-2.47009	-2.60867	-2.06668	-1.0512
YFR051C	RET2	-0.0646374	0.157709	-0.0135381	-1.87827	-1.25139	-0.969527	-2.11319	-1.82098	-1.86955	-1.99755	-0.136293
YJL198W	PHO90	-0.0670613	0.192767	0.208544	-0.745073	-1.01333	-0.659775	-2.63329	-2.7581	-2.92991	-2.51678	-0.563946
YEL053C	MAK10	-0.116684	0.0436697	-0.0784092	-0.740039	-0.787596	-0.518176	-1.69147	-2.07923	-2.03948	-2.04646	-0.16165
YBL032W	HEK2	-0.358284	-0.0349473	-0.128195	-2.31639	-1.66592	-1.15195	-2.29674	-2.09128	-2.35996	-2.04036	-0.380369
YLL001W	DNM1	-0.169951	0.19771	-0.10884	-1.59634	-0.769688	-0.36611	-1.98457	-2.17502	-2.16331	-2.02645	0.683853
YIL125W	KGD1	-0.0894017	0.201303	-0.126662	-2.0019	-0.743704	-0.431165	-1.85571	-1.54624	-1.59176	-1.42475	0.824919
YIL090W	ICE2	0.0164687	0.207895	0.101523	-1.08553	-0.946729	-0.758383	-2.20279	-2.25428	-2.16964	-1.96979	-0.261773
YKR072C	SIS2	0.0549344	0.246489	0.136553	-1.24367	-1.09494	-0.651837	-2.33135	-2.285	-2.59681	-2.44655	-0.544148
YDR485C	VPS72	-0.107329	0.139106	0.217326	-1.48592	-0.750176	-0.301717	-2.10832	-1.71846	-2.04775	-1.90164	0.0285733
YDR494W	RSM28	-0.0349143	0.304325	0.160912	-1.41293	-0.925127	-0.325898	-2.05948	-1.81892	-2.18289	-2.08716	0.0151262
YOR086C	TCB1	-0.169161	0.12803	-0.144405	-2.63713	-1.49765	-0.891753	-2.29225	-1.8319	-2.00569	-1.90599	0.488799
YPR118W	MRI1	-0.199567	0.00856827	-0.106429	-1.3396	-1.08731	-0.913164	-2.83455	-2.52022	-2.32862	-2.10509	-0.467133
YPR088C	SRP54	-0.06332	0.248299	0.02188	-1.47422	-1.15232	-0.755884	-2.40099	-1.72954	-1.81923	-1.84854	-0.136281
YDR181C	SAS4	0.0198816	0.199314	0.164054	-1.61216	-0.750221	-0.505262	-1.90615	-1.93966	-2.0193	-1.9155	0.0950911
YJR132W	NMD5	-0.0290571	0.177038	0.0729519	-1.49972	-1.0847	-0.646114	-2.21778	-1.9375	-1.90245	-1.6385	-0.628149
YAL017W	PSK1	-0.203454	0.0923182	-0.132355	-2.62233	-1.1239	-0.489565	-2.40816	-1.9166	-1.94996	-2.06992	0.995197
YGL172W	NUP49	0.00059329	0.296204	-0.063048	-1.74134	-1.04655	-0.758119	-2.39564	-1.94456	-2.03681	-1.93893	-0.0464418
YPR069C	SPE3	-0.215565	-0.248707	-0.12338	-1.57499	-2.35679	-1.70953	-2.11947	-1.08374	-1.27197	-0.999905	-0.868126
YPL081W	RPS9A	-0.197687	0.183465	0.0309966	-0.576851	-0.996657	-0.833215	-1.31154	-1.56514	-1.34617	-0.983638	-0.502598
YMR261C	TPS3	-0.171051	-0.0368715	-0.297303	-2.80431	-1.1039	-0.685891	-2.34214	-2.32325	-2.35965	-2.2658	0.708071
YLR414C	PUN1	-0.602697	-0.915401	-0.661102	-2.56398	-2.26004	-1.93267	-1.44857	-0.965956	-0.925823	-1.63708	1.5285
YNL147W	LSM7	-0.228825	0.0373534	0.0252826	-1.28439	-1.2404	-0.662691	-2.59888	-2.72296	-2.60509	-2.43442	-0.169132
YHL027W	RIM101	-0.0693483	0.114168	0.103268	-1.27201	-0.986787	-0.683074	-2.09189	-1.86648	-1.90448	-2.00826	0.666181
YER172C	BRR2	-0.0270941	0.166055	0.136041	-1.6988	-1.28779	-0.774025	-2.28571	-2.14757	-2.04663	-1.96792	-0.0597078
YLR328W	NMA1	-0.411043	-0.424161	-0.549448	-1.56771	-1.99212	-1.53885	-3.49313	-3.2549	-2.76418	-2.57431	-0.467071
YNL050C	YNL050C	0.0555511	0.319346	0.446694	-1.22096	-0.716647	-0.351745	-2.27542	-2.02678	-2.02429	-1.82901	-0.419682
YNL051W	COG5	-0.0177818	0.156299	0.153477	-1.47946	-0.541881	-0.191904	-1.97516	-2.02797	-2.12471	-2.17865	-0.106577
YNL288W	CAF40	-0.178668	0.249128	0.00778228	-1.55169	-1.26074	-0.871261	-1.98984	-2.09221	-2.09579	-2.07216	-0.491259
YNL182C	IPI3	-0.0266022	0.238521	0.196728	-1.22097	-1.36289	-1.07289	-2.88787	-2.78575	-2.85742	-2.37658	-0.919873
YPL234C	VMA11	-0.0309273	0.133747	-0.181141	-1.33223	-1.01454	-0.756903	-2.73276	-2.04818	-1.8278	-1.88917	0.259525
YOR273C	TPO4	-1.53815	-1.40603	-1.10459	-5.70085	-4.17249	-3.93856	-0.412887	-0.017229	-0.114162	-0.775889	1.25804
YBL097W	BRN1	-0.0495501	0.0286556	0.206439	-2.24152	-1.10274	-0.436506	-2.39585	-2.05518	-2.49525	-2.02477	-0.0306946
YNL238W	KEX2	-0.194212	0.0523389	-0.0523939	-1.50866	-1.38491	-0.963016	-1.99151	-2.07123	-1.93587	-1.77278	-0.313206
YDR098C	GRX3	-0.153494	-0.153718	-0.31654	-0.763729	-1.40761	-1.20318	-2.37216	-2.11425	-1.99483	-2.0164	0.119204
YLR096W	KIN2	-0.223376	0.0697159	-0.0292916	-1.83186	-1.32904	-0.740282	-1.8429	-1.98963	-2.0338	-1.76794	-0.0301179
YOR119C	RIO1	-0.0826911	0.218881	0.485759	-1.12013	-1.27956	-0.797621	-3.08389	-2.38822	-2.40304	-2.19771	-0.693535
YNL199C	GCR2	0.067989	0.247874	0.129734	-1.46185	-1.37768	-0.831346	-2.47495	-2.31599	-2.33392	-2.16401	-0.297096
YJR062C	NTA1	-0.0695453	0.137355	0.0143726	-1.59111	-0.758973	-0.299808	-2.07665	-1.67322	-1.79926	-1.88773	0.214141
YOR211C	MGM1	0.0418333	0.277832	0.0792522	-1.77575	-0.993221	-0.571399	-2.30902	-1.90298	-2.08665	-1.85252	0.173521
YFR041C	ERJ5	-0.0680037	-0.0508329	0.0346546	-2.06503	-1.02354	-0.522739	-2.50724	-2.0919	-1.93369	-1.98736	0.0632287
YFR031C	SMC2	0.0851944	0.305855	0.308056	-1.48344	-0.731933	-0.362173	-1.89894	-2.1534	-2.29959	-2.00015	0.0103465
YKR064W	OAF3	-0.0190701	-0.0366553	0.13618	-1.34478	-0.894656	-0.547336	-2.01128	-1.55029	-1.66336	-1.76272	-0.103736
YOR171C	LCB4	0.09246	0.281682	0.117903	-1.63542	-0.790277	-0.321311	-2.0816	-1.9494	-1.9457	-1.84096	-0.143628
YIL047C	SYG1	-0.363746	-0.16137	-0.450302	-0.544856	-0.87244	-0.645492	-2.01738	-2.54114	-2.32658	-2.36174	-0.491523
YPL266W	DIM1	-0.158598	0.284144	0.343128	-0.528546	-1.05383	-0.720911	-3.07539	-2.50837	-2.64375	-1.94595	-0.800175
YEL036C	ANP1	-0.210719	0.159681	-0.146276	-1.27124	-1.37948	-0.810998	-2.39621	-2.32662	-2.6354	-2.60029	0.0980215
YMR071C	TVP18	-0.313162	-0.294332	-0.306895	-1.12625	-1.63999	-1.3204	-2.32851	-2.37603	-1.61007	-2.09269	0.0689492
YKL008C	LAC1	-0.425801	-0.388303	-0.0910798	-1.5436	-1.86306	-1.38028	-2.40975	-1.30726	-0.707506	-1.14799	-0.167421
YIL147C	SLN1	-0.0626967	0.190424	0.00961188	-1.55865	-0.741958	-0.327742	-2.37487	-2.20649	-2.25059	-1.92351	0.0118544
YLR095C	IOC2	-0.0873425	0.119961	0.158002	-1.78402	-1.00804	-0.378319	-2.07743	-1.82955	-2.03898	-1.89876	0.0850151
YPL163C	SVS1	-1.13424	-0.499566	-0.853594	-2.00041	-2.6481	-1.99893	-0.816967	-0.478152	-0.546008	-1.21546	0.377957
YLR367W	RPS22B	-0.108839	0.161454	0.206283	-0.596666	-1.28345	-0.444541	-2.44116	-1.42306	-1.18983	-1.5463	-0.200483
YNL330C	RPD3	-0.0618041	0.276581	0.047958	-1.62976	-1.0482	-0.532112	-2.17465	-2.15055	-1.97193	-1.80323	0.11548
YML071C	COG8	-0.0662018	0.45945	0.431871	-1.60478	-0.759151	0.0319018	-2.92336	-2.64382	-3.07632	-2.44797	-0.0650544
YBR234C	ARC40	-0.222957	-0.016039	-0.0137406	-2.02576	-1.24283	-0.609924	-2.33241	-1.8212	-1.79261	-1.8766	0.217397
YHR181W	SVP26	-0.0616205	0.0598045	-0.0302355	-1.51974	-0.752834	-0.462189	-2.84337	-2.37616	-2.1108	-2.21962	-0.0021833
YMR296C	LCB1	-0.286653	0.0123663	-0.117938	-1.67434	-1.66854	-1.26174	-2.42601	-2.55182	-2.36382	-2.15782	-0.304385
YLR073C	RFU1	0.127844	0.444439	0.309074	0.0752391	-1.04529	-0.839557	-2.41195	-2.38663	-2.68012	-3.02289	-0.912058
YPR034W	ARP7	-0.251629	0.221938	0.126752	-1.43671	-1.3692	-0.994934	-2.56342	-1.9733	-2.21254	-2.27037	-0.13513
YJL011C	RPC17	0.295885	0.274106	0.0950486	-1.22852	-0.742893	-0.393115	-2.40715	-2.48242	-2.56654	-2.88463	-0.757827
YAR007C	RFA1	-0.413983	-0.0340066	-0.149613	-1.97701	-1.47625	-0.869721	-2.36873	-2.36999	-2.44744	-2.31507	0.0242816
YNL062C	GCD10	-0.00485948	0.151762	0.207241	-0.795738	-1.38201	-0.950749	-2.57888	-2.26343	-2.28056	-1.98833	-0.835134
YGL129C	RSM23	-0.0446331	0.174407	-0.0276191	-1.47507	-0.994555	-0.546263	-2.04053	-1.90314	-1.85657	-2.02327	0.0500179
YGL111W	NSA1	0.0531316	0.398619	0.186293	-0.849543	-1.15165	-0.828417	-2.68959	-2.51603	-2.54032	-2.10446	-0.664629
YLR278C	YLR278C	-0.256081	-0.112999	0.149907	-1.57663	-1.36939	-1.00189	-2.65314	-2.09522	-2.34965	-2.18916	0.131422
YMR304W	UBP15	-0.120751	-0.0199333	-0.173119	-2.06173	-0.998917	-0.592933	-2.9333	-2.45993	-2.53238	-2.28663	0.622355
YGR063C	SPT4	-0.402584	0.159652	-0.0589427	-1.09011	-0.81113	-0.569585	-2.0847	-1.84763	-1.35796	-2.06665	0.0156255
YDR216W	ADR1	-0.152152	-0.262921	-0.440688	-1.60585	-0.684343	-0.138141	-1.57788	-1.20558	-1.34669	-1.1625	1.23092
YGL178W	MPT5	0.00401156	0.110573	-0.104165	-1.15693	-0.718987	-0.392824	-1.92629	-1.96611	-2.09858	-1.96752	0.348829
YHR165C	PRP8	0.0724628	0.335085	0.244959	-1.45233	-0.950652	-0.432282	-1.70901	-1.54096	-1.68707	-1.42341	-0.251915
YLR138W	NHA1	-0.145123	0.0988576	0.0185409	-1.62224	-1.07358	-0.587267	-3.03264	-2.51606	-2.49236	-2.23976	0.0940026
YOL032W	OPI10	0.144158	0.432213	-0.160906	-2.67598	-1.60797	-1.46588	-2.12458	-2.08194	-2.20097	-2.04927	0.923698
YMR117C	SPC24	-0.0941838	-0.109623	-0.13186	-2.14883	-1.27164	-0.34599	-1.65449	-1.93704	-2.49831	-2.37558	-0.227868
YBL040C	ERD2	0.0122392	0.216214	0.0199963	-1.59275	-0.983592	-0.593032	-1.98537	-1.85475	-1.44572	-1.53704	0.0360666
YER111C	SWI4	-0.249186	0.0992618	0.025824	-1.88912	-0.523529	-0.0571947	-2.58595	-2.24209	-2.54076	-2.14963	0.273781
YLR454W	FMP27	0.00844702	0.127636	-0.0541417	-1.91996	-0.746869	-0.167067	-2.30594	-2.04178	-2.08206	-1.85512	0.842911
YBR073W	RDH54	-0.14431	0.0318657	-0.0467282	-1.54288	-0.908351	-0.279273	-1.63344	-1.20891	-1.30696	-1.2836	0.165815
YHR118C	ORC6	-0.186381	-0.0262404	0.00627411	-1.17745	-1.23962	-0.731358	-1.85544	-1.70888	-1.99394	-1.97996	-0.0995325
YLR120C	YPS1	-0.244708	-0.480149	-0.651492	-1.95708	-1.84205	-1.32914	-2.02141	-2.02	-1.76781	-2.02318	1.26629
YOL013C	HRD1	-0.198243	-0.0732038	-0.00134713	-1.77584	-0.819767	-0.362564	-2.30809	-2.28743	-2.16989	-2.09673	0.121292
YMR061W	RNA14	0.332373	0.316494	0.370981	-1.21846	-0.967501	-0.637893	-1.284	-1.38677	-1.32918	-1.30687	0.091843
YHR146W	CRP1	-0.470932	-0.142123	-0.0344285	-1.56458	-1.42834	-0.754499	-2.5134	-2.30501	-2.41398	-2.16093	-0.118794
YBL107C	MIX23	0.184184	0.0555809	0.190711	-1.35483	-0.557494	-0.142433	-3.6104	-2.24108	-2.31601	-2.326	0.0979815
YDR159W	SAC3	0.0979857	0.239213	0.226381	-1.64251	-0.81908	-0.404197	-1.98065	-1.91846	-2.14016	-1.80418	-0.0997277
YCR065W	HCM1	-0.545521	-0.155852	-0.410966	-1.87222	-1.53817	-0.995234	-1.08331	-0.779069	-0.698733	-1.26371	-0.177851
YGR147C	NAT2	0.0338937	0.193259	0.142436	-1.06777	-1.41091	-0.975195	-1.899	-1.72137	-1.81621	-1.96187	-0.140031
YOR150W	MRPL23	-0.18337	0.156877	-0.137363	-1.61171	-0.929814	-0.509957	-2.51149	-2.23349	-1.19486	-2.0677	0.349487
YMR145C	NDE1	-0.769491	-0.225692	-1.38632	-1.55044	-2.16296	-1.88465	-0.0135848	-0.213315	-0.284326	-0.825747	0.774923
YML100W	TSL1	-1.41628	-1.23706	-1.8684	-5.43902	-2.19984	-1.95129	-0.362849	0.5142	0.330418	-0.467587	3.30522
YCR069W	CPR4	-0.18974	-0.0152229	0.0242937	-1.76337	-0.86484	-0.408535	-2.39816	-2.49043	-2.11385	-2.00661	0.473148
YPL116W	HOS3	-0.286635	-0.168237	-0.221493	-2.24605	-1.63102	-1.00045	-2.35421	-2.16673	-2.11081	-2.25948	0.218162
YKL010C	UFD4	-0.015595	0.184641	-0.00397604	-1.09644	-1.0092	-0.530537	-1.77812	-1.56558	-1.57611	-1.53786	0.438641
YBR015C	MNN2	-0.398458	0.0606302	-0.184983	-1.63225	-1.21339	-0.824574	-2.80317	-2.4635	-2.17256	-2.54452	-0.0618893
YCR107W	AAD3	-0.520436	-0.216494	-0.331286	-2.11376	-1.10397	-0.860075	-2.21926	-2.06201	-2.24589	-2.28329	-0.40348
YJR143C	PMT4	-0.25959	0.104785	-0.250658	-1.73529	-1.49259	-0.926235	-2.59325	-1.87626	-1.68118	-1.74571	-0.390094
YPR073C	LTP1	0.329484	0.383657	0.395999	-1.06108	-0.482077	-0.415441	-3.55663	-2.36994	-2.05386	-2.03464	0.136179
YBL090W	MRP21	0.111781	0.239337	0.0517364	-1.22374	-0.866574	-0.639788	-2.39306	-2.74758	-2.18756	-2.01418	0.0243517
YMR016C	SOK2	-0.400302	-0.126941	0.0589619	-1.3033	-0.9691	-0.62875	-1.7455	-1.06527	-0.935645	-1.40113	-0.0375556
YNL111C	CYB5	0.109773	0.122962	0.41192	-1.44869	-0.487396	-0.35973	-2.56326	-2.37662	-2.23904	-2.8182	-0.537516
YGR081C	SLX9	0.248311	0.285347	0.587206	-0.688183	-1.1184	-0.829345	-2.61368	-2.41651	-2.18164	-2.07915	-0.540239
YBR095C	RXT2	0.0627214	0.153193	0.250686	-1.57118	-1.00252	-0.496913	-2.39218	-2.22969	-2.16877	-1.8236	0.103409
YDR498C	SEC20	-0.132436	0.110311	0.203279	-2.16766	-0.915157	-0.327148	-2.28129	-1.93398	-2.29835	-2.18622	-0.23783
YPR141C	KAR3	-0.341244	0.0133233	0.0416956	-1.8475	-1.24396	-0.614109	-1.6258	-1.6827	-1.88967	-1.50878	-0.0662942
YNR013C	PHO91	-0.364814	-0.0253719	-0.31803	-1.93897	-1.83715	-1.27753	-2.22616	-2.28078	-2.39712	-2.10222	-0.146976
YML125C	PGA3	-0.211438	-0.240166	-0.504706	-1.57389	-2.21969	-1.64576	-2.56085	-2.46994	-2.37053	-1.63377	-0.445527
YGL049C	TIF4632	-0.206407	0.101797	-0.0876335	-2.00959	-0.99666	-0.418991	-2.56873	-2.33723	-2.3772	-2.1737	-0.195268
YLR226W	BUR2	0.00345731	-0.00832925	0.127244	-0.906732	-0.844517	-0.638424	-2.44993	-2.35077	-2.4144	-2.05725	-0.0226776
YCL001W	RER1	-0.291661	0.258688	-0.133878	-1.78351	-1.78082	-1.09649	-2.53663	-2.35124	-1.76423	-2.10891	-0.184038
YPL203W	TPK2	-0.35032	-0.146405	-0.406142	-3.06701	-1.6628	-1.00739	-1.89133	-2.42052	-2.02616	-2.0374	0.813899
YHR200W	RPN10	-0.355271	0.150347	-0.224735	-1.46719	-1.48013	-0.901289	-2.22619	-1.90731	-1.74105	-2.38063	0.0561994
YDR481C	PHO8	0.0890234	0.249507	0.052405	-2.30825	-1.69483	-1.40637	-1.55245	-1.68899	-1.75404	-1.8395	0.119599
YER029C	SMB1	-0.272752	0.140409	0.29155	-1.64415	-1.33602	-0.620993	-2.61137	-2.0957	-2.49919	-2.25452	-0.160509
YGL125W	MET13	-0.25519	-0.159598	0.0797801	-0.805818	-0.62651	-0.441947	-0.0861705	-0.382745	-0.424598	-0.680919	0.078621
YDL236W	PHO13	-0.197694	0.242439	-0.168798	-1.476	-1.38939	-0.858674	-2.44133	-1.96573	-1.86217	-1.83167	0.00435963
YCL017C	NFS1	-0.220065	-0.0474969	0.0247221	-1.18359	-1.05127	-0.676603	-2.135	-2.06293	-2.04348	-1.78243	-0.0325783
YKR074W	AIM29	0.00311734	-0.0142364	0.0660904	-1.36254	-0.962417	-0.458872	-3.27418	-2.40662	-2.53047	-2.49601	0.0536391
YLR327C	TMA10	-0.786424	-0.982688	-0.349199	-0.118696	-0.642463	-1.4458	-1.86808	-0.550259	-0.231052	-1.23849	3.8342
YDL166C	FAP7	-0.152133	0.119363	0.0793312	-1.18682	-1.39775	-0.661539	-2.55843	-2.25889	-1.92686	-2.10651	-0.340806
YBR023C	CHS3	-0.20672	0.07685	-0.34202	-1.36682	-1.18056	-0.722288	-2.43671	-2.41044	-2.32607	-2.16174	0.294339
YHL038C	CBP2	0.0399092	0.0578848	0.272709	-1.16903	-0.498452	-0.250258	-2.58221	-2.26747	-2.37514	-2.081	-0.0194455
YLR373C	VID22	-0.184084	-0.0156797	-0.127048	-2.41353	-1.31122	-0.783093	-2.15256	-2.20931	-2.1764	-2.06599	-0.20141
YHR029C	YHI9	-0.153251	-0.051477	-0.333239	-0.878316	-0.964547	-0.788986	-1.55196	-1.73126	-1.52621	-1.62953	0.012655
YHL039W	EFM1	-0.259332	0.149775	0.205171	-0.344352	-0.494476	-0.396613	-2.24705	-2.37833	-2.12653	-2.05683	-0.595572
YDR093W	DNF2	-0.148163	-0.0270107	-0.22655	-1.81869	-1.3457	-0.965355	-2.73863	-2.46935	-2.47404	-2.00137	-0.265844
YBL017C	PEP1	-0.0371818	0.0810912	-0.0960363	-1.64756	-1.29498	-0.88477	-2.14403	-1.78106	-1.82862	-1.64624	0.356026
YLR069C	MEF1	-0.171763	0.222497	0.0554583	-2.0116	-1.10726	-0.552721	-2.4065	-2.08506	-2.07392	-1.75893	0.326901
YNL207W	RIO2	0.0894922	0.349857	0.360106	-0.854436	-1.05857	-0.844852	-2.60061	-2.13342	-1.9341	-1.85766	-0.738189
YJR054W	KCH1	-0.179162	-0.0720531	-0.21629	-1.50465	-0.967053	-0.706722	-2.72082	-2.53281	-2.562	-2.18641	0.0240058
YML110C	COQ5	-0.317756	0.0102912	-0.211391	-1.9005	-1.45324	-0.691761	-2.55947	-1.85555	-1.60804	-1.91875	0.638578
YGR136W	LSB1	-0.251517	-0.0343621	-0.162296	-2.0829	-1.79536	-1.1797	-1.7256	-1.46316	-1.291	-1.76438	0.664752
YPR191W	QCR2	-0.137605	0.364214	-0.377132	-1.37282	-0.389504	-0.121339	-1.95577	-0.990083	-1.10557	-1.07404	1.09861
YGL073W	HSF1	-0.0236015	0.17513	0.0682558	-1.44143	-1.00804	-0.547233	-2.17705	-1.93152	-2.48995	-2.3293	0.337483
YPL188W	POS5	0.152924	0.214918	-0.0176196	-0.540493	-0.727847	-0.506522	-2.48352	-2.83138	-2.58721	-2.78387	-0.0910228
YGR210C	YGR210C	-0.068756	0.372057	0.30309	-1.12304	-1.60154	-1.30635	-2.54447	-2.29119	-2.13149	-2.25874	-0.371572
YHR063C	PAN5	0.114073	0.253166	-0.0197436	-1.18929	-0.860741	-0.731619	-2.71229	-2.14994	-2.50612	-1.86069	0.124837
YML032C	RAD52	-0.231566	0.0805947	-0.0605517	-1.37969	-1.0094	-0.692882	-1.89182	-2.19477	-1.91839	-1.98948	-0.156503
YKR006C	MRPL13	0.0450927	0.0986251	0.20404	-1.23675	-0.9805	-0.556142	-2.42898	-1.95059	-1.70066	-1.90886	0.219841
YDR012W	RPL4B	-0.198329	0.094275	0.0060533	-1.01734	-1.34085	-0.9913	-2.48842	-2.08588	-2.07179	-2.08361	-0.434994
YNR006W	VPS27	-0.208946	-0.0662301	-0.032378	-1.65675	-0.943662	-0.567882	-2.31742	-2.3848	-2.52323	-2.24812	0.354199
YOR230W	WTM1	-0.60187	-0.4432	-0.960092	-2.2711	-2.21995	-1.97718	-1.92351	-0.443347	-0.562429	-0.699363	0.962688
YLR419W	YLR419W	-0.00562841	0.166627	0.252202	-1.40654	-1.22396	-0.605223	-2.15754	-2.21112	-2.31752	-1.77549	-0.427091
YCR043C	YCR043C	-0.408516	-0.00944811	-0.191688	-1.76257	-1.36571	-0.866376	-2.59657	-2.1929	-1.89888	-2.0496	-0.597572
YJL072C	PSF2	0.127801	0.255267	0.206544	-0.759659	-0.456075	-0.0614621	-1.92866	-2.51898	-2.1327	-2.34342	-0.285525
YIL151C	ESL1	0.122058	0.370905	0.250776	-1.50029	-0.793084	-0.493568	-1.77831	-1.7417	-1.91323	-1.70153	-0.0255271
YOL062C	APM4	-0.223173	0.0892758	0.00717953	-1.61916	-1.02445	-0.58748	-2.21085	-2.06347	-1.86817	-2.10512	0.00443252
YML081W	TDA9	-0.0600602	0.0871451	0.0474599	-1.56216	-1.17829	-0.741071	-1.93986	-1.83886	-1.89206	-1.72743	-0.170916
YIL063C	YRB2	-0.253544	0.186724	0.110389	-1.65245	-0.923702	-0.427361	-2.79242	-2.27003	-2.64403	-2.31454	0.23339
YDR524C	AGE1	0.331508	0.568783	0.434183	-1.21155	-1.22683	-0.97666	-1.29538	-1.87741	-1.92262	-1.6467	-0.322228
YKL023W	YKL023W	-0.257251	0.0709147	0.136664	-1.42775	-0.761107	-0.139477	-2.38732	-1.78063	-2.181	-2.36264	0.463266
YOR299W	BUD7	-0.141346	0.0449969	-0.0328814	-1.858	-1.3606	-0.961401	-2.43953	-2.55878	-2.31663	-2.28658	0.152736
YPR115W	RGC1	-0.199332	0.0204815	-0.312524	-2.13896	-0.940303	-0.443461	-2.13099	-1.45193	-1.59689	-1.28071	0.611102
YDR244W	PEX5	-0.125858	0.0143377	0.0230863	-1.76434	-1.11871	-0.645998	-1.70744	-1.83849	-2.13768	-1.72841	0.0708272
YIL008W	URM1	0.123806	0.325662	0.315192	-0.972582	-0.707969	-0.560694	-3.95448	-1.988	-2.67828	-2.11383	-0.40212
YGL036W	YGL036W	-0.06108	0.0928437	-0.13827	-2.17619	-0.570534	-0.286983	-2.36669	-2.47704	-2.77362	-2.3631	0.389828
YDR531W	CAB1	0.0490185	0.0200649	-0.110062	-0.764443	-0.762227	-0.593459	-2.62782	-2.51852	-2.38311	-2.22822	-0.119003
YBL005W	PDR3	-0.309526	-0.268398	-0.32573	-1.80979	-1.91592	-1.63592	-2.3194	-2.26439	-2.19729	-2.11877	-0.354813
YPR055W	SEC8	-0.0648121	0.109414	0.114306	-1.85887	-1.06071	-0.606628	-1.96463	-1.8121	-1.83884	-1.9048	0.234083
YDR422C	SIP1	-0.148139	0.282161	0.230645	-1.61871	-0.840812	-0.478528	-1.90239	-1.67297	-1.81899	-1.54876	-0.0386243
YHR119W	SET1	-0.153169	-0.0223533	-0.0683953	-1.50989	-1.37925	-0.806636	-2.32831	-1.92894	-2.2492	-1.92084	-0.332527
YKR085C	MRPL20	0.084543	0.106092	0.267506	-1.36023	-1.20042	-0.674824	-2.38954	-2.28084	-2.26406	-2.04582	-0.049165
YBR185C	MBA1	-0.0998358	0.148441	-0.0882704	-1.59681	-0.862287	-0.637354	-2.57811	-2.05985	-2.22755	-1.79089	0.310935
YMR158W	MRPS8	0.222647	0.196651	0.0545667	-1.47946	-1.01646	-0.731642	-2.14509	-2.05347	-1.71832	-2.53837	-0.034629
YKL002W	DID4	-0.137228	0.242317	0.251806	-1.33771	-0.632329	-0.17624	-2.26455	-1.93857	-1.77078	-1.76825	0.139351
YNL088W	TOP2	-0.145048	0.0282827	-0.094644	-1.71795	-1.01677	-0.519932	-2.49437	-1.99975	-2.19796	-2.01304	0.0207892
YOL129W	VPS68	-0.134649	0.0784983	-0.380144	-1.59008	-1.24542	-0.69558	-2.45747	-2.05531	-1.74737	-2.0029	0.615122
YDR206W	EBS1	0.0386834	0.117754	0.0869378	-1.27556	-0.838985	-0.534537	-1.90489	-1.99888	-1.9166	-1.74557	-0.158931
YHR158C	KEL1	-0.225728	-0.00169756	0.0445395	-1.8267	-1.09667	-0.544136	-2.38681	-1.96388	-2.47422	-2.19025	-0.0354922
YOL103W	ITR2	-0.017448	0.0272374	-0.221046	-2.20488	-1.25246	-0.920084	-2.70685	-2.05366	-2.00136	-1.87536	-0.177664
YJR082C	EAF6	-0.115401	0.412113	0.27386	-1.27805	-1.1904	-0.584355	-2.78912	-1.70073	-1.44168	-1.99888	0.102924
YNR039C	ZRG17	-0.105095	-0.057005	0.264772	-1.62245	-1.0043	-0.645424	-1.36904	-2.23104	-2.12213	-2.0841	-0.00461333
YKL137W	CMC1	0.113159	0.367786	0.216779	-0.962467	-0.781479	-0.10948	-2.79994	-3.21209	-2.53317	-2.7678	0.439529
YGR005C	TFG2	-0.0373761	0.357783	0.291033	-1.63461	-0.693166	-0.16814	-2.22694	-1.72423	-1.78892	-1.85516	-0.000941954
YDR310C	SUM1	-0.0938914	0.250916	0.0219579	-1.94528	-1.52001	-1.0109	-2.468	-2.40728	-2.57812	-2.07526	-0.238291
YIL044C	AGE2	-0.0355592	0.30847	0.166345	-1.43603	-0.576801	-0.289762	-2.43496	-2.3517	-2.26948	-2.08267	-0.163522
YHR122W	CIA2	-0.161179	-0.233387	-0.305676	-0.346385	-1.41177	-1.14664	-2.41192	-2.29671	-1.99608	-2.00708	-0.325813
YML034W	SRC1	-0.291411	-0.133008	-0.0979985	-1.99481	-1.14369	-0.626833	-2.26537	-2.23465	-2.02463	-2.02068	0.362931
YPL227C	ALG5	-0.0703213	0.0590237	-0.143471	-1.57121	-1.51972	-0.953881	-2.51502	-2.41085	-2.36592	-2.40013	-0.397398
YHL035C	VMR1	-0.64124	-1.52446	-0.379385	-1.32283	-2.40298	-2.40346	-1.18866	-1.00642	-1.10473	-1.21142	0.443056
YFL047W	RGD2	-0.131965	0.159052	-0.314364	-1.61445	-1.07489	-0.822769	-2.56278	-2.23857	-2.28136	-2.08584	0.0305516
YHR132W-A	IGO2	0.158086	0.276172	-0.196159	-1.747	-0.956917	-0.621418	-2.06029	-2.36497	-1.84593	-2.22492	0.0644059
YPL001W	HAT1	0.111292	0.429971	0.333927	-1.42368	-0.570006	-0.174766	-2.51022	-2.26149	-2.00536	-2.2519	0.0335407
YML017W	PSP2	-0.0234065	0.344208	0.0875126	-1.38849	-0.889495	-0.359912	-2.15819	-1.97769	-1.99745	-1.57336	-0.154009
YNL071W	LAT1	-0.187843	0.103557	-0.232669	-1.70139	-1.13128	-0.941604	-2.3318	-1.77986	-1.6526	-1.44827	0.286682
YOL059W	GPD2	-0.718223	-0.358792	-0.843477	-1.12627	-1.09838	-1.17919	-1.95859	-1.5235	-0.778077	-1.76954	-0.328434
YMR027W	YMR027W	-0.0752398	-0.0834208	0.00766557	-1.38528	-1.14862	-0.610922	-2.56092	-2.1514	-2.25526	-2.19075	0.374803
YLR219W	MSC3	-0.392545	0.0107951	-0.00767383	-2.35637	-1.36846	-0.807542	-1.74509	-2.05651	-2.30347	-2.17164	0.434628
YMR286W	MRPL33	-0.114425	0.212668	0.23309	-1.15438	-0.873351	-0.589708	-2.30728	-2.51405	-2.21526	-1.95328	0.217995
YIL068C	SEC6	0.0705817	0.18577	0.241275	-1.72496	-0.830262	-0.353219	-2.2208	-2.21222	-2.5885	-1.93621	-0.488405
YDL045W-A	MRP10	-0.309017	0.175617	0.15595	-0.986869	-0.810557	-0.477465	-2.3449	-1.6708	-1.75037	-1.96497	0.141334
[truncated: 2,831 more rows]
