# Supplementary material for: Two roles for the yeast transcription coactivator SAGA and a set of genes redundantly regulated by TFIID and SAGA
Source: eLife. 2020 Jan 8;9:e50109. doi: 10.7554/eLife.50109 (PMC6977968; doi:10.7554/eLife.50109)
Supplement: Figure 3—figure supplement 1—source data 1. — Data was used to plot Figure 3—figure supplement 1A. [file elife-50109-fig3-figsupp1-data1.xlsx]

## Sheet: Source_Data_FigS3A
gene_id	gene_name	class	Huisinga_class
YPR036W-A	SPO24	CR
YLR109W	AHP1	CR	SAGA-dominated
YHR179W	OYE2	CR	TFIID-dominated
YGR209C	TRX2	CR	SAGA-dominated
YOL151W	GRE2	CR	SAGA-dominated
YGR192C	TDH3	CR	SAGA-dominated
YOL109W	ZEO1	CR	SAGA-dominated
YLR110C	CCW12	CR	SAGA-dominated
YDL184C	RPL41A	TFIID	TFIID-dominated
YDL133C-A	RPL41B	TFIID	no call
YDR524C-B	YDR524C-B	CR
YGL008C	PMA1	CR	SAGA-dominated
YPL240C	HSP82	CR	SAGA-dominated
YMR186W	HSC82	CR	TFIID-dominated
YBR244W	GPX2	CR	SAGA-dominated
YNL134C	YNL134C	CR	SAGA-dominated
YHR174W	ENO2	CR	SAGA-dominated
YCR012W	PGK1	CR	SAGA-dominated
YGR142W	BTN2	CR	TFIID-dominated
YML028W	TSA1	CR	SAGA-dominated
YOR298C-A	MBF1	CR
YLR075W	RPL10	CR	TFIID-dominated
YLL024C	SSA2	CR	TFIID-dominated
YKL152C	GPM1	CR	SAGA-dominated
YML131W	YML131W	CR	no call
YCR024C-A	PMP1	CR	SAGA-dominated
YOR153W	PDR5	CR	SAGA-dominated
YPL187W	MF(ALPHA)1	CR	SAGA/TFIID
YLR460C	YLR460C	CR	TFIID-dominated
YDR353W	TRR1	CR	TFIID-dominated
YGR055W	MUP1	CR	SAGA-dominated
YJR104C	SOD1	CR	SAGA-dominated
YDR011W	SNQ2	CR	SAGA-dominated
YNL031C	HHT2	CR	TFIID-dominated
YGR155W	CYS4	CR	TFIID-dominated
YKL060C	FBA1	CR	SAGA-dominated
YEL017C-A	PMP2	CR	SAGA-dominated
YAL005C	SSA1	CR	TFIID-dominated
YPL061W	ALD6	CR	SAGA-dominated
YJR045C	SSC1	CR	TFIID-dominated
YAL038W	CDC19	CR	SAGA-dominated
YLL026W	HSP104	CR	no call
YNL030W	HHF2	CR	SAGA-dominated
YBR008C	FLR1	CR	TFIID-dominated
YLR249W	YEF3	CR	TFIID-dominated
YDR050C	TPI1	CR	SAGA-dominated
YOR369C	RPS12	TFIID	TFIID-dominated
YGR234W	YHB1	CR	SAGA/TFIID
YER091C	MET6	CR	SAGA-dominated
YJL034W	KAR2	CR	TFIID-dominated
YLR355C	ILV5	CR	SAGA-dominated
YCL026C-A	FRM2	CR
YIL053W	GPP1	CR	SAGA-dominated
YDR224C	HTB1	CR	TFIID-dominated
YDR225W	HTA1	CR	TFIID-dominated
YLR044C	PDC1	CR	SAGA-dominated
YLR325C	RPL38	TFIID	TFIID-dominated
YLR108C	YLR108C	CR	TFIID-dominated
YJR123W	RPS5	TFIID	TFIID-dominated
YNL178W	RPS3	TFIID	TFIID-dominated
YLR167W	RPS31	TFIID	TFIID-dominated
YNL007C	SIS1	CR	SAGA-dominated
YBR009C	HHF1	CR	TFIID-dominated
YHL015W	RPS20	TFIID	TFIID-dominated
YBR101C	FES1	TFIID	TFIID-dominated
YNL064C	YDJ1	TFIID	TFIID-dominated
YOR020C	HSP10	TFIID	TFIID-dominated
YDL081C	RPP1A	TFIID	TFIID-dominated
YBL002W	HTB2	CR	TFIID-dominated
YEL009C	GCN4	CR	TFIID-dominated
YOR027W	STI1	CR	TFIID-dominated
YHR055C	CUP1-2	CR	SAGA-dominated
YDL124W	YDL124W	CR	SAGA-dominated
YDL055C	PSA1	CR	SAGA-dominated
YEL034W	HYP2	CR	TFIID-dominated
YBR010W	HHT1	CR	TFIID-dominated
YPL106C	SSE1	TFIID	TFIID-dominated
YEL071W	DLD3	CR	SAGA-dominated
YAL003W	EFB1	CR	TFIID-dominated
YMR058W	FET3	CR	TFIID-dominated
YDR382W	RPP2B	TFIID	TFIID-dominated
YCR005C	CIT2	CR	SAGA-dominated
YEL046C	GLY1	CR	TFIID-dominated
YLR441C	RPS1A	TFIID	TFIID-dominated
YOL086C	ADH1	CR	SAGA-dominated
YMR318C	ADH6	CR	TFIID-dominated
YPR149W	NCE102	CR	SAGA-dominated
YKL096W-A	CWP2	CR
YKL056C	TMA19	CR	TFIID-dominated
YCR024C-B	YCR024C-B	CR
YGL253W	HXK2	CR	TFIID-dominated
YLR259C	HSP60	TFIID	TFIID-dominated
YPL131W	RPL5	TFIID	TFIID-dominated
YBL003C	HTA2	CR	TFIID-dominated
YOR063W	RPL3	CR	TFIID-dominated
YDL020C	RPN4	CR	TFIID-dominated
YNL231C	PDR16	CR	SAGA-dominated
YHR162W	MPC2	CR	SAGA-dominated
YCL026C-B	HBN1	CR
YOL039W	RPP2A	TFIID	TFIID-dominated
YKL081W	TEF4	CR	TFIID-dominated
YDL061C	RPS29B	TFIID	TFIID-dominated
YJL101C	GSH1	CR	TFIID-dominated
YJL190C	RPS22A	TFIID	TFIID-dominated
YLR216C	CPR6	TFIID	TFIID-dominated
YLR029C	RPL15A	TFIID	TFIID-dominated
YKR071C	DRE2	CR	TFIID-dominated
YOR302W	YOR302W	CR	SAGA-dominated
YDR502C	SAM2	CR	TFIID-dominated
YDR033W	MRH1	CR	SAGA-dominated
YPR065W	ROX1	CR	SAGA-dominated
YLR340W	RPP0	TFIID	TFIID-dominated
YLR264W	RPS28B	TFIID	TFIID-dominated
YER131W	RPS26B	TFIID	TFIID-dominated
YBL092W	RPL32	TFIID	TFIID-dominated
YJR009C	TDH2	CR	SAGA-dominated
YDR135C	YCF1	CR	TFIID-dominated
YPL250C	ICY2	CR	SAGA-dominated
YML063W	RPS1B	TFIID	TFIID-dominated
YCR102C	YCR102C	CR	TFIID-dominated
YGL255W	ZRT1	CR	SAGA/TFIID
YAL012W	CYS3	CR	TFIID-dominated
YBR196C	PGI1	CR	TFIID-dominated
YGR027C	RPS25A	TFIID	TFIID-dominated
YER043C	SAH1	CR	TFIID-dominated
YMR251W-A	HOR7	CR	SAGA-dominated
YML116W	ATR1	CR	TFIID-dominated
YJL159W	HSP150	CR	SAGA-dominated
YGL123W	RPS2	TFIID	TFIID-dominated
YBR078W	ECM33	CR	SAGA-dominated
YEL054C	RPL12A	TFIID	TFIID-dominated
YGL189C	RPS26A	TFIID	TFIID-dominated
YER177W	BMH1	CR	SAGA/TFIID
YBR068C	BAP2	CR	SAGA-dominated
YHR143W	DSE2	CR	SAGA-dominated
YHR071W	PCL5	CR	SAGA-dominated
YHR018C	ARG4	CR	SAGA-dominated
YOR052C	TMC1	CR	SAGA-dominated
YGR157W	CHO2	CR	TFIID-dominated
YGR148C	RPL24B	TFIID	TFIID-dominated
YOR167C	RPS28A	TFIID	TFIID-dominated
YML130C	ERO1	CR	TFIID-dominated
YDR258C	HSP78	TFIID	SAGA-dominated
YMR307W	GAS1	CR
YLR286C	CTS1	CR	SAGA-dominated
YHL033C	RPL8A	TFIID	TFIID-dominated
YHR072W-A	NOP10	TFIID
YDR418W	RPL12B	TFIID	TFIID-dominated
YHR005C-A	TIM10	TFIID
YFL039C	ACT1	TFIID	TFIID-dominated
YDR513W	GRX2	CR	SAGA-dominated
YDL192W	ARF1	TFIID	TFIID-dominated
YER145C	FTR1	CR	TFIID-dominated
YGL089C	MF(ALPHA)2	CR	SAGA/TFIID
YDR037W	KRS1	CR	TFIID-dominated
YDR132C	YDR132C	CR	SAGA-dominated
YDL147W	RPN5	TFIID	TFIID-dominated
YLR333C	RPS25B	TFIID	TFIID-dominated
YOR198C	BFR1	TFIID	TFIID-dominated
YPR145W	ASN1	CR	SAGA-dominated
YGR211W	ZPR1	TFIID	TFIID-dominated
YER052C	HOM3	CR	SAGA-dominated
YLR197W	NOP56	TFIID	TFIID-dominated
YPR080W	TEF1	CR	TFIID-dominated
YKR042W	UTH1	CR	TFIID-dominated
YML123C	PHO84	CR	SAGA/TFIID
YER124C	DSE1	CR	SAGA-dominated
YBR118W	TEF2	CR	SAGA-dominated
YOL040C	RPS15	TFIID	TFIID-dominated
YLR293C	GSP1	TFIID	TFIID-dominated
YEL027W	VMA3	TFIID	TFIID-dominated
YLR304C	ACO1	CR	SAGA-dominated
YGR282C	BGL2	TFIID	TFIID-dominated
YDL229W	SSB1	TFIID	no call
YKL216W	URA1	CR	TFIID-dominated
YDR099W	BMH2	TFIID	TFIID-dominated
YBR025C	OLA1	TFIID	TFIID-dominated
YGR169C-A	LSO2	TFIID
YKL068W-A	YKL068W-A	CR
YPL237W	SUI3	TFIID	TFIID-dominated
YDR002W	YRB1	TFIID	TFIID-dominated
YDL182W	LYS20	CR	SAGA-dominated
YGL031C	RPL24A	TFIID	TFIID-dominated
YMR309C	NIP1	TFIID	TFIID-dominated
YLL060C	GTT2	CR	TFIID-dominated
YDR086C	SSS1	TFIID	SAGA-dominated
YDR276C	PMP3	CR	SAGA-dominated
YDR533C	HSP31	CR	SAGA-dominated
YDR497C	ITR1	CR	TFIID-dominated
YLL045C	RPL8B	TFIID	TFIID-dominated
YLR214W	FRE1	CR	TFIID-dominated
YDR155C	CPR1	CR	SAGA-dominated
YDR171W	HSP42	CR	SAGA-dominated
YLR150W	STM1	TFIID	TFIID-dominated
YOR007C	SGT2	TFIID	TFIID-dominated
YDR363W-A	SEM1	TFIID
YDL232W	OST4	TFIID	TFIID-dominated
YGL054C	ERV14	TFIID	TFIID-dominated
YNL209W	SSB2	TFIID	TFIID-dominated
YNL067W	RPL9B	TFIID	TFIID-dominated
YOR136W	IDH2	CR	SAGA-dominated
YNL036W	NCE103	CR	SAGA-dominated
YJR007W	SUI2	TFIID	TFIID-dominated
YPL037C	EGD1	TFIID	TFIID-dominated
YIL138C	TPM2	TFIID	TFIID-dominated
YOL139C	CDC33	TFIID	TFIID-dominated
YPR165W	RHO1	TFIID	TFIID-dominated
YBR143C	SUP45	TFIID	TFIID-dominated
YDR345C	HXT3	CR	SAGA-dominated
YPR035W	GLN1	CR	SAGA-dominated
YNL281W	HCH1	TFIID	TFIID-dominated
YER165W	PAB1	TFIID	TFIID-dominated
YNL244C	SUI1	TFIID	TFIID-dominated
YDL084W	SUB2	TFIID	TFIID-dominated
YMR038C	CCS1	CR	TFIID-dominated
YNL069C	RPL16B	TFIID	TFIID-dominated
YBR082C	UBC4	TFIID	TFIID-dominated
YBR079C	RPG1	TFIID	TFIID-dominated
YOR226C	ISU2	CR	SAGA-dominated
YLR043C	TRX1	TFIID	TFIID-dominated
YPL091W	GLR1	CR	TFIID-dominated
YOR383C	FIT3	CR	TFIID-dominated
YMR260C	TIF11	TFIID	TFIID-dominated
YGL135W	RPL1B	TFIID	TFIID-dominated
YOR344C	TYE7	CR	SAGA-dominated
YJR109C	CPA2	CR	SAGA-dominated
YKL172W	EBP2	TFIID	TFIID-dominated
YGR240C	PFK1	CR	SAGA-dominated
YNL255C	GIS2	TFIID	TFIID-dominated
YPR158W	CUR1	TFIID	TFIID-dominated
YBR189W	RPS9B	TFIID	TFIID-dominated
YPL225W	YPL225W	TFIID	TFIID-dominated
YNL327W	EGT2	CR	SAGA-dominated
YGR085C	RPL11B	TFIID	TFIID-dominated
YKL182W	FAS1	CR	SAGA/TFIID
YAL035W	FUN12	TFIID	TFIID-dominated
YHR008C	SOD2	CR	SAGA-dominated
YER036C	ARB1	TFIID	TFIID-dominated
YLR346C	YLR346C	CR	SAGA-dominated
YBR085C-A	YBR085C-A	CR
YLR300W	EXG1	CR	SAGA-dominated
YER048W-A	ISD11	TFIID
YOR096W	RPS7A	TFIID	SAGA/TFIID
YMR116C	ASC1	TFIID	SAGA/TFIID
YOR210W	RPB10	TFIID	TFIID-dominated
YPL231W	FAS2	CR	TFIID-dominated
YDR194C	MSS116	TFIID	TFIID-dominated
YKL043W	PHD1	CR	SAGA-dominated
YDL168W	SFA1	CR	TFIID-dominated
YML091C	RPM2	CR	SAGA-dominated
YER021W	RPN3	TFIID	TFIID-dominated
YNL079C	TPM1	TFIID	TFIID-dominated
YGL028C	SCW11	CR	SAGA-dominated
YCL050C	APA1	TFIID	TFIID-dominated
YOR204W	DED1	CR	TFIID-dominated
YPL135W	ISU1	CR	SAGA-dominated
YNL131W	TOM22	TFIID	TFIID-dominated
YML106W	URA5	TFIID	TFIID-dominated
YHR193C	EGD2	TFIID	TFIID-dominated
YOL127W	RPL25	TFIID	TFIID-dominated
YLR372W	ELO3	TFIID	TFIID-dominated
YOR382W	FIT2	CR	TFIID-dominated
YGR118W	RPS23A	TFIID	TFIID-dominated
YKL164C	PIR1	CR	SAGA-dominated
YLR048W	RPS0B	TFIID	TFIID-dominated
YHR082C	KSP1	TFIID	TFIID-dominated
YLR175W	CBF5	TFIID	TFIID-dominated
YGR254W	ENO1	CR	SAGA-dominated
YGR159C	NSR1	TFIID	TFIID-dominated
YCR021C	HSP30	CR	SAGA-dominated
YEL040W	UTR2	CR	SAGA-dominated
YKL082C	RRP14	TFIID	TFIID-dominated
YBR109C	CMD1	TFIID	TFIID-dominated
YNL287W	SEC21	TFIID	TFIID-dominated
YML058W	SML1	CR	TFIID-dominated
YDR071C	PAA1	TFIID	TFIID-dominated
YER025W	GCD11	TFIID	TFIID-dominated
YDL243C	AAD4	CR	TFIID-dominated
YLR136C	TIS11	CR	TFIID-dominated
YBR011C	IPP1	TFIID	TFIID-dominated
YEL026W	SNU13	TFIID	TFIID-dominated
YNL121C	TOM70	TFIID	TFIID-dominated
YDL126C	CDC48	TFIID	TFIID-dominated
YPR132W	RPS23B	TFIID	TFIID-dominated
YBR162C	TOS1	CR	TFIID-dominated
YLR180W	SAM1	CR	TFIID-dominated
YPR133W-A	TOM5	TFIID
YJL148W	RPA34	TFIID	TFIID-dominated
YGR264C	MES1	TFIID	TFIID-dominated
YJL124C	LSM1	TFIID	TFIID-dominated
YBL076C	ILS1	TFIID	TFIID-dominated
YLL028W	TPO1	CR	SAGA-dominated
YER148W	SPT15	TFIID	TFIID-dominated
YHR143W-A	RPC10	TFIID	TFIID-dominated
YIL078W	THS1	TFIID	TFIID-dominated
YKL040C	NFU1	CR	TFIID-dominated
YKL180W	RPL17A	TFIID	TFIID-dominated
YGL058W	RAD6	TFIID	TFIID-dominated
YJL111W	CCT7	TFIID	TFIID-dominated
YGR086C	PIL1	CR	SAGA-dominated
YMR108W	ILV2	TFIID	TFIID-dominated
YPR102C	RPL11A	TFIID	TFIID-dominated
YDL014W	NOP1	TFIID	TFIID-dominated
YHR027C	RPN1	TFIID	TFIID-dominated
YOR312C	RPL20B	TFIID	TFIID-dominated
YOR261C	RPN8	TFIID	TFIID-dominated
YIL075C	RPN2	TFIID	TFIID-dominated
YLR388W	RPS29A	TFIID	TFIID-dominated
YLR342W	FKS1	CR	TFIID-dominated
YPL145C	KES1	TFIID	TFIID-dominated
YGL147C	RPL9A	TFIID	TFIID-dominated
YDR427W	RPN9	TFIID	TFIID-dominated
YCL031C	RRP7	TFIID	TFIID-dominated
YMR205C	PFK2	CR	SAGA-dominated
YOR276W	CAF20	TFIID	TFIID-dominated
YNR051C	BRE5	TFIID	TFIID-dominated
YDL185W	VMA1	TFIID	TFIID-dominated
YIL142W	CCT2	TFIID	TFIID-dominated
YFR033C	QCR6	CR	SAGA-dominated
YGL030W	RPL30	TFIID	TFIID-dominated
YMR012W	CLU1	TFIID	TFIID-dominated
YPR108W	RPN7	TFIID	TFIID-dominated
YBR067C	TIP1	TFIID	TFIID-dominated
YBR158W	AMN1	CR	SAGA-dominated
YBL028C	YBL028C	TFIID	TFIID-dominated
YDL208W	NHP2	TFIID	TFIID-dominated
YER102W	RPS8B	TFIID	TFIID-dominated
YKL156W	RPS27A	TFIID	TFIID-dominated
YPL274W	SAM3	CR	SAGA-dominated
YNL180C	RHO5	CR	TFIID-dominated
YOR122C	PFY1	TFIID	TFIID-dominated
YPL004C	LSP1	CR	SAGA-dominated
YOR310C	NOP58	TFIID	TFIID-dominated
YDL130W	RPP1B	TFIID	TFIID-dominated
YMR122W-A	YMR122W-A	CR
YOR303W	CPA1	CR	SAGA-dominated
YOR270C	VPH1	TFIID	TFIID-dominated
YGL215W	CLG1	TFIID	TFIID-dominated
YGL105W	ARC1	TFIID	TFIID-dominated
YLR421C	RPN13	TFIID	TFIID-dominated
YDR233C	RTN1	TFIID	TFIID-dominated
YDR054C	CDC34	TFIID	TFIID-dominated
YPR074C	TKL1	TFIID	TFIID-dominated
YKL071W	YKL071W	CR	SAGA/TFIID
YDR023W	SES1	TFIID	TFIID-dominated
YER064C	VHR2	CR	SAGA-dominated
YKR076W	ECM4	CR	SAGA-dominated
YML026C	RPS18B	TFIID	TFIID-dominated
YCR093W	CDC39	TFIID	TFIID-dominated
YHR007C	ERG11	CR	SAGA-dominated
YLR390W-A	CCW14	CR
YPL226W	NEW1	TFIID	TFIID-dominated
YJR094W-A	RPL43B	TFIID	TFIID-dominated
YDL074C	BRE1	TFIID	TFIID-dominated
YER026C	CHO1	CR	TFIID-dominated
YPL239W	YAR1	TFIID	TFIID-dominated
YLR354C	TAL1	CR	TFIID-dominated
YDL137W	ARF2	TFIID	TFIID-dominated
YJR121W	ATP2	CR	TFIID-dominated
YDR487C	RIB3	CR	TFIID-dominated
YDL082W	RPL13A	TFIID	TFIID-dominated
YML126C	ERG13	TFIID	TFIID-dominated
YDR046C	BAP3	CR	SAGA-dominated
YPL154C	PEP4	CR	SAGA-dominated
YPR041W	TIF5	TFIID	TFIID-dominated
YOR293W	RPS10A	TFIID	TFIID-dominated
YDR060W	MAK21	TFIID	TFIID-dominated
YGR162W	TIF4631	TFIID	TFIID-dominated
YPL160W	CDC60	TFIID	TFIID-dominated
YDR003W-A	YDR003W-A	TFIID
YMR142C	RPL13B	TFIID	TFIID-dominated
YDR064W	RPS13	TFIID	TFIID-dominated
YOR151C	RPB2	TFIID	TFIID-dominated
YPL093W	NOG1	TFIID	TFIID-dominated
YKL009W	MRT4	TFIID	TFIID-dominated
YMR177W	MMT1	CR	TFIID-dominated
YGR037C	ACB1	TFIID	TFIID-dominated
YCL037C	SRO9	TFIID	TFIID-dominated
YLR009W	RLP24	TFIID	TFIID-dominated
YGR285C	ZUO1	TFIID	TFIID-dominated
YKL122C	SRP21	TFIID	TFIID-dominated
YOR341W	RPA190	TFIID	TFIID-dominated
YOL058W	ARG1	CR	SAGA-dominated
YFR032C-A	RPL29	TFIID	TFIID-dominated
YCR031C	RPS14A	TFIID	TFIID-dominated
YIL069C	RPS24B	TFIID	TFIID-dominated
YNL016W	PUB1	TFIID	TFIID-dominated
YDR172W	SUP35	TFIID	TFIID-dominated
YKL196C	YKT6	TFIID	TFIID-dominated
YNL154C	YCK2	TFIID	TFIID-dominated
YMR242C	RPL20A	TFIID	TFIID-dominated
YJR088C	EMC2	TFIID	TFIID-dominated
YKL001C	MET14	TFIID	TFIID-dominated
YGR253C	PUP2	TFIID	TFIID-dominated
YOR254C	SEC63	TFIID	TFIID-dominated
YBR106W	PHO88	TFIID	TFIID-dominated
YDL097C	RPN6	TFIID	TFIID-dominated
YLR040C	AFB1	CR	TFIID-dominated
YBR283C	SSH1	TFIID	TFIID-dominated
YGR218W	CRM1	TFIID	TFIID-dominated
YNL260C	LTO1	CR	TFIID-dominated
YMR072W	ABF2	TFIID	TFIID-dominated
YKL013C	ARC19	TFIID	TFIID-dominated
YGL206C	CHC1	TFIID	TFIID-dominated
YOR232W	MGE1	TFIID	TFIID-dominated
YBL027W	RPL19B	TFIID	TFIID-dominated
YPL243W	SRP68	TFIID	TFIID-dominated
YER055C	HIS1	CR	TFIID-dominated
YKR094C	RPL40B	TFIID	TFIID-dominated
YER072W	VTC1	CR	TFIID-dominated
YMR039C	SUB1	TFIID	TFIID-dominated
YNR016C	ACC1	CR	SAGA/TFIID
YDL070W	BDF2	CR	SAGA-dominated
YOR206W	NOC2	TFIID	TFIID-dominated
YBR127C	VMA2	TFIID	TFIID-dominated
YFR004W	RPN11	TFIID	TFIID-dominated
YGL037C	PNC1	CR	SAGA-dominated
YLR347C	KAP95	TFIID	SAGA-dominated
YJL127C-B	YJL127C-B	TFIID
YFL045C	SEC53	TFIID	SAGA/TFIID
YPR110C	RPC40	TFIID	TFIID-dominated
YDL160C	DHH1	TFIID	TFIID-dominated
YIL133C	RPL16A	TFIID	TFIID-dominated
YML073C	RPL6A	TFIID	TFIID-dominated
YER122C	GLO3	TFIID	TFIID-dominated
YDR496C	PUF6	TFIID	TFIID-dominated
YNL087W	TCB2	CR	TFIID-dominated
YLR060W	FRS1	TFIID	TFIID-dominated
YKL039W	PTM1	CR	TFIID-dominated
YHR052W	CIC1	TFIID	TFIID-dominated
YCR053W	THR4	TFIID	no call
YMR002W	MIX17	CR	SAGA-dominated
YER070W	RNR1	CR	SAGA-dominated
YPL220W	RPL1A	TFIID	TFIID-dominated
YGL207W	SPT16	TFIID	TFIID-dominated
YER073W	ALD5	CR	SAGA-dominated
YOR335C	ALA1	TFIID	TFIID-dominated
YFL031W	HAC1	CR	TFIID-dominated
YCR009C	RVS161	TFIID	TFIID-dominated
YLL050C	COF1	TFIID	TFIID-dominated
YBL056W	PTC3	TFIID	TFIID-dominated
YNL190W	YNL190W	CR	SAGA-dominated
YNL229C	URE2	TFIID	TFIID-dominated
YPR187W	RPO26	TFIID	TFIID-dominated
YLR448W	RPL6B	TFIID	SAGA/TFIID
YIL051C	MMF1	CR	TFIID-dominated
YJR105W	ADO1	TFIID	TFIID-dominated
YER133W	GLC7	TFIID	TFIID-dominated
YGL103W	RPL28	TFIID	TFIID-dominated
YNL308C	KRI1	TFIID	TFIID-dominated
YLR061W	RPL22A	TFIID	TFIID-dominated
YNL153C	GIM3	TFIID	TFIID-dominated
YMR308C	PSE1	TFIID	TFIID-dominated
YPL210C	SRP72	TFIID	TFIID-dominated
YDR429C	TIF35	TFIID	TFIID-dominated
YDR447C	RPS17B	TFIID	TFIID-dominated
YOR361C	PRT1	TFIID	TFIID-dominated
YNL110C	NOP15	TFIID	TFIID-dominated
YDR341C	YDR341C	TFIID	TFIID-dominated
YGR279C	SCW4	CR	TFIID-dominated
YKL117W	SBA1	TFIID	TFIID-dominated
YHR064C	SSZ1	TFIID	TFIID-dominated
YOR355W	GDS1	TFIID	TFIID-dominated
YBR121C	GRS1	TFIID	TFIID-dominated
YNL189W	SRP1	TFIID	TFIID-dominated
YDR368W	YPR1	TFIID	TFIID-dominated
YNL241C	ZWF1	CR	SAGA-dominated
YOL121C	RPS19A	TFIID	TFIID-dominated
YKL103C	APE1	CR	SAGA-dominated
YLR287C-A	RPS30A	CR	TFIID-dominated
YNL096C	RPS7B	TFIID	SAGA/TFIID
YHL034C	SBP1	TFIID	TFIID-dominated
YLR455W	PDP3	TFIID	TFIID-dominated
YNL070W	TOM7	TFIID	TFIID-dominated
YIL148W	RPL40A	TFIID	TFIID-dominated
YER009W	NTF2	TFIID	TFIID-dominated
YJR122W	IBA57	TFIID	TFIID-dominated
YHR183W	GND1	CR	TFIID-dominated
YNL104C	LEU4	CR	SAGA-dominated
YGR094W	VAS1	TFIID	TFIID-dominated
YDR158W	HOM2	CR	TFIID-dominated
YPL260W	YPL260W	TFIID	TFIID-dominated
YAL025C	MAK16	TFIID	TFIID-dominated
YDR238C	SEC26	TFIID	TFIID-dominated
YPR024W	YME1	TFIID	TFIID-dominated
YPR181C	SEC23	TFIID	SAGA/TFIID
YNL118C	DCP2	TFIID	TFIID-dominated
YKR008W	RSC4	TFIID	TFIID-dominated
YER090W	TRP2	TFIID	TFIID-dominated
YOR117W	RPT5	TFIID	TFIID-dominated
YGR034W	RPL26B	TFIID	TFIID-dominated
YNL212W	VID27	TFIID	TFIID-dominated
YMR229C	RRP5	TFIID	TFIID-dominated
YAL016W	TPD3	TFIID	TFIID-dominated
YMR161W	HLJ1	TFIID	TFIID-dominated
YFR052W	RPN12	TFIID	TFIID-dominated
YNL066W	SUN4	CR	SAGA-dominated
YFL016C	MDJ1	TFIID	TFIID-dominated
YNL113W	RPC19	TFIID	TFIID-dominated
YOR168W	GLN4	TFIID	TFIID-dominated
YPL204W	HRR25	TFIID	TFIID-dominated
YGL190C	CDC55	TFIID	TFIID-dominated
YOR370C	MRS6	TFIID	TFIID-dominated
YDR151C	CTH1	TFIID	TFIID-dominated
YKR057W	RPS21A	TFIID	TFIID-dominated
YER087C-B	SBH1	TFIID
YDR035W	ARO3	TFIID	TFIID-dominated
YOR267C	HRK1	TFIID	SAGA-dominated
YLR413W	INA1	CR	SAGA/TFIID
YBL072C	RPS8A	TFIID	TFIID-dominated
YEL065W	SIT1	CR	TFIID-dominated
YBR154C	RPB5	TFIID	TFIID-dominated
YGR116W	SPT6	TFIID	TFIID-dominated
YOL136C	PFK27	CR	SAGA-dominated
YPL078C	ATP4	TFIID	TFIID-dominated
YJL109C	UTP10	TFIID	TFIID-dominated
YMR235C	RNA1	TFIID	TFIID-dominated
YDR091C	RLI1	TFIID	no call
YBL099W	ATP1	TFIID	TFIID-dominated
YPR036W	VMA13	TFIID	TFIID-dominated
YOL154W	ZPS1	CR	SAGA/TFIID
YLR051C	FCF2	TFIID	TFIID-dominated
YNL002C	RLP7	TFIID	TFIID-dominated
YKR095W	MLP1	TFIID	TFIID-dominated
YBR034C	HMT1	TFIID	TFIID-dominated
YDL140C	RPO21	TFIID	TFIID-dominated
YDR394W	RPT3	TFIID	TFIID-dominated
YPL117C	IDI1	TFIID	TFIID-dominated
YGR135W	PRE9	TFIID	TFIID-dominated
YNL085W	MKT1	TFIID	TFIID-dominated
YLR064W	PER33	CR	TFIID-dominated
YML012W	ERV25	TFIID	TFIID-dominated
YBL041W	PRE7	TFIID	TFIID-dominated
YKL210W	UBA1	TFIID	TFIID-dominated
YGL011C	SCL1	TFIID	TFIID-dominated
YDR471W	RPL27B	TFIID	TFIID-dominated
YGR124W	ASN2	TFIID	TFIID-dominated
YOR332W	VMA4	TFIID	TFIID-dominated
YER002W	NOP16	TFIID	TFIID-dominated
YJL189W	RPL39	TFIID	TFIID-dominated
YKL178C	STE3	CR	TFIID-dominated
YFL004W	VTC2	CR	TFIID-dominated
YDL145C	COP1	TFIID	TFIID-dominated
YGL195W	GCN1	TFIID	TFIID-dominated
YJL052W	TDH1	CR	SAGA-dominated
YMR143W	RPS16A	TFIID	TFIID-dominated
YML007W	YAP1	CR	TFIID-dominated
YDR077W	SED1	CR	TFIID-dominated
YMR079W	SEC14	TFIID	TFIID-dominated
YDR270W	CCC2	CR	TFIID-dominated
YJR063W	RPA12	TFIID	TFIID-dominated
YDR214W	AHA1	CR	TFIID-dominated
YPR103W	PRE2	TFIID	TFIID-dominated
YDR365C	ESF1	TFIID	TFIID-dominated
YCL043C	PDI1	CR	TFIID-dominated
YOL120C	RPL18A	TFIID	TFIID-dominated
YGL173C	XRN1	TFIID	TFIID-dominated
YGL122C	NAB2	TFIID	TFIID-dominated
YDL235C	YPD1	TFIID	TFIID-dominated
YDL075W	RPL31A	TFIID	TFIID-dominated
YLR276C	DBP9	TFIID	TFIID-dominated
YER012W	PRE1	TFIID	TFIID-dominated
YPL212C	PUS1	TFIID	TFIID-dominated
YKL184W	SPE1	TFIID	TFIID-dominated
YMR230W	RPS10B	TFIID	TFIID-dominated
YDL029W	ARP2	CR	TFIID-dominated
YLR447C	VMA6	TFIID	TFIID-dominated
YNL024C-A	KSH1	TFIID
YJR117W	STE24	TFIID	TFIID-dominated
YPL249C-A	RPL36B	TFIID
YKL057C	NUP120	TFIID	TFIID-dominated
YLR257W	YLR257W	TFIID	SAGA-dominated
YOR039W	CKB2	TFIID	TFIID-dominated
YDR346C	SVF1	TFIID	TFIID-dominated
YPL043W	NOP4	TFIID	TFIID-dominated
YOR360C	PDE2	TFIID	TFIID-dominated
YGL029W	CGR1	TFIID	TFIID-dominated
YFR040W	SAP155	TFIID	TFIID-dominated
YNL248C	RPA49	TFIID	TFIID-dominated
YDL007W	RPT2	TFIID	TFIID-dominated
YML024W	RPS17A	TFIID	TFIID-dominated
YOL027C	MDM38	TFIID	TFIID-dominated
YBL024W	NCL1	TFIID	TFIID-dominated
YER103W	SSA4	TFIID	SAGA-dominated
YIL126W	STH1	TFIID	TFIID-dominated
YPL050C	MNN9	TFIID	TFIID-dominated
YOR259C	RPT4	TFIID	TFIID-dominated
YDR174W	HMO1	TFIID	TFIID-dominated
YMR188C	MRPS17	TFIID	TFIID-dominated
YOL145C	CTR9	TFIID	TFIID-dominated
YDR299W	BFR2	TFIID	TFIID-dominated
YGR020C	VMA7	TFIID	TFIID-dominated
YPR072W	NOT5	TFIID	TFIID-dominated
YDR212W	TCP1	TFIID	TFIID-dominated
YKL054C	DEF1	CR	TFIID-dominated
YLR292C	SEC72	TFIID	TFIID-dominated
YPL179W	PPQ1	TFIID	TFIID-dominated
YMR217W	GUA1	TFIID	TFIID-dominated
YIL035C	CKA1	TFIID	TFIID-dominated
YDR381W	YRA1	CR	SAGA/TFIID
YHR128W	FUR1	CR	TFIID-dominated
YMR146C	TIF34	TFIID	TFIID-dominated
YPL190C	NAB3	TFIID	TFIID-dominated
YJL014W	CCT3	TFIID	TFIID-dominated
YKR052C	MRS4	CR	TFIID-dominated
YML103C	NUP188	TFIID	TFIID-dominated
YPR143W	RRP15	TFIID	TFIID-dominated
YMR246W	FAA4	CR	TFIID-dominated
YNL197C	WHI3	TFIID	TFIID-dominated
YKL035W	UGP1	CR	SAGA-dominated
YPL202C	AFT2	CR	TFIID-dominated
YOR089C	VPS21	TFIID	TFIID-dominated
YOL077C	BRX1	TFIID	TFIID-dominated
YBR286W	APE3	CR	SAGA-dominated
YJL130C	URA2	CR	SAGA-dominated
YGR103W	NOP7	TFIID	TFIID-dominated
YER126C	NSA2	TFIID	TFIID-dominated
YDR450W	RPS18A	TFIID	TFIID-dominated
YMR183C	SSO2	TFIID	TFIID-dominated
YKR014C	YPT52	TFIID	TFIID-dominated
YHR196W	UTP9	TFIID	TFIID-dominated
YGR229C	SMI1	TFIID	TFIID-dominated
YOL049W	GSH2	TFIID	TFIID-dominated
YML074C	FPR3	TFIID	TFIID-dominated
YIL118W	RHO3	TFIID	TFIID-dominated
YMR131C	RRB1	TFIID	TFIID-dominated
YNL061W	NOP2	TFIID	TFIID-dominated
YBR177C	EHT1	CR	TFIID-dominated
YJL002C	OST1	TFIID	TFIID-dominated
YDR377W	ATP17	TFIID	TFIID-dominated
YFL037W	TUB2	TFIID	TFIID-dominated
YPL171C	OYE3	CR	TFIID-dominated
YGL238W	CSE1	TFIID	TFIID-dominated
YPL178W	CBC2	TFIID	TFIID-dominated
YDL148C	NOP14	TFIID	TFIID-dominated
YIL038C	NOT3	TFIID	TFIID-dominated
YJL008C	CCT8	TFIID	TFIID-dominated
YOR043W	WHI2	TFIID	TFIID-dominated
YHR094C	HXT1	CR	SAGA-dominated
YGR185C	TYS1	TFIID	TFIID-dominated
YDR190C	RVB1	TFIID	TFIID-dominated
YML022W	APT1	TFIID	TFIID-dominated
YJL177W	RPL17B	TFIID	TFIID-dominated
YHR141C	RPL42B	TFIID	TFIID-dominated
YBR084C-A	RPL19A	TFIID	TFIID-dominated
YBL022C	PIM1	TFIID	no call
YDR508C	GNP1	CR	TFIID-dominated
YGR017W	YGR017W	TFIID	TFIID-dominated
YFR010W	UBP6	TFIID	TFIID-dominated
YDR264C	AKR1	TFIID	TFIID-dominated
YFL038C	YPT1	TFIID	TFIID-dominated
YGL077C	HNM1	CR	TFIID-dominated
YHL011C	PRS3	TFIID	TFIID-dominated
YPL273W	SAM4	TFIID	TFIID-dominated
YKL063C	YKL063C	TFIID	TFIID-dominated
YBR130C	SHE3	TFIID	TFIID-dominated
YGR132C	PHB1	TFIID	TFIID-dominated
YHR170W	NMD3	TFIID	TFIID-dominated
YBR049C	REB1	TFIID	TFIID-dominated
YDR395W	SXM1	TFIID	TFIID-dominated
YGR090W	UTP22	TFIID	TFIID-dominated
YOR078W	BUD21	TFIID	TFIID-dominated
YER136W	GDI1	TFIID	TFIID-dominated
YDL180W	YDL180W	CR	TFIID-dominated
YPR169W	JIP5	TFIID	TFIID-dominated
YLR033W	RSC58	TFIID	TFIID-dominated
YPR043W	RPL43A	TFIID	TFIID-dominated
YOL041C	NOP12	TFIID	TFIID-dominated
YIL018W	RPL2B	TFIID	TFIID-dominated
YMR194W	RPL36A	TFIID	TFIID-dominated
YKR028W	SAP190	TFIID	TFIID-dominated
YDR032C	PST2	CR	TFIID-dominated
YPL118W	MRP51	TFIID	TFIID-dominated
YDL083C	RPS16B	TFIID	TFIID-dominated
YBR146W	MRPS9	TFIID	TFIID-dominated
YKL028W	TFA1	TFIID	TFIID-dominated
YDR028C	REG1	TFIID	TFIID-dominated
YKL006W	RPL14A	TFIID	TFIID-dominated
YKL179C	COY1	TFIID	TFIID-dominated
YGR054W	YGR054W	TFIID	TFIID-dominated
YJL080C	SCP160	TFIID	TFIID-dominated
YOR290C	SNF2	TFIID	TFIID-dominated
YER056C	FCY2	CR	SAGA-dominated
YPL079W	RPL21B	TFIID	TFIID-dominated
YPL265W	DIP5	CR	SAGA-dominated
YDL025C	RTK1	CR	TFIID-dominated
YGL009C	LEU1	TFIID	TFIID-dominated
YHR135C	YCK1	TFIID	TFIID-dominated
YER074W	RPS24A	TFIID	TFIID-dominated
YKR081C	RPF2	TFIID	TFIID-dominated
YGR106C	VOA1	TFIID	TFIID-dominated
YGL245W	GUS1	TFIID	TFIID-dominated
YGR161C	RTS3	CR	SAGA-dominated
YDL125C	HNT1	CR	TFIID-dominated
YDL122W	UBP1	TFIID	TFIID-dominated
YJL136C	RPS21B	TFIID	TFIID-dominated
YKR011C	YKR011C	TFIID	TFIID-dominated
YDL053C	PBP4	TFIID	TFIID-dominated
YCL054W	SPB1	TFIID	TFIID-dominated
YCL011C	GBP2	TFIID	TFIID-dominated
YDR127W	ARO1	CR	TFIID-dominated
YIL149C	MLP2	TFIID	TFIID-dominated
YFR002W	NIC96	TFIID	TFIID-dominated
YJL133C-A	YJL133C-A	CR
YPL012W	RRP12	TFIID	TFIID-dominated
YGR146C	ECL1	CR	no call
YPL215W	CBP3	TFIID	TFIID-dominated
YML009C	MRPL39	TFIID	TFIID-dominated
YGR128C	UTP8	TFIID	TFIID-dominated
YOL068C	HST1	TFIID	TFIID-dominated
YPR016C	TIF6	TFIID	TFIID-dominated
YGR231C	PHB2	TFIID	TFIID-dominated
YER123W	YCK3	TFIID	TFIID-dominated
YDR226W	ADK1	CR	TFIID-dominated
YPR010C	RPA135	TFIID	TFIID-dominated
YGR130C	YGR130C	TFIID	SAGA-dominated
YEL051W	VMA8	TFIID	TFIID-dominated
YCR004C	YCP4	TFIID	TFIID-dominated
YMR295C	YMR295C	TFIID	TFIID-dominated
YNL044W	YIP3	TFIID	TFIID-dominated
YML093W	UTP14	TFIID	TFIID-dominated
YDR152W	GIR2	TFIID	TFIID-dominated
YDR153C	ENT5	TFIID	TFIID-dominated
YLR297W	YLR297W	CR	SAGA-dominated
YPL146C	NOP53	TFIID	TFIID-dominated
YNL005C	MRP7	TFIID	TFIID-dominated
YPL105C	SYH1	TFIID	TFIID-dominated
YNR021W	YNR021W	TFIID	TFIID-dominated
YPL019C	VTC3	CR	TFIID-dominated
YJR014W	TMA22	TFIID	TFIID-dominated
YHR005C	GPA1	TFIID	SAGA-dominated
YBR162W-A	YSY6	TFIID	TFIID-dominated
YML056C	IMD4	TFIID	TFIID-dominated
YKL145W	RPT1	TFIID	TFIID-dominated
YHR203C	RPS4B	TFIID	TFIID-dominated
YGL244W	RTF1	TFIID	TFIID-dominated
YDL116W	NUP84	TFIID	TFIID-dominated
YDL143W	CCT4	TFIID	TFIID-dominated
YMR203W	TOM40	TFIID	TFIID-dominated
YLR310C	CDC25	TFIID	TFIID-dominated
YOR008C	SLG1	TFIID	TFIID-dominated
YKL120W	OAC1	CR	TFIID-dominated
YDR335W	MSN5	TFIID	TFIID-dominated
YHR077C	NMD2	TFIID	TFIID-dominated
YGR267C	FOL2	TFIID	TFIID-dominated
YEL033W	MTC7	CR	TFIID-dominated
YPR067W	ISA2	TFIID	TFIID-dominated
YBR086C	IST2	TFIID	TFIID-dominated
YGR175C	ERG1	CR	TFIID-dominated
YGL043W	DST1	TFIID	TFIID-dominated
YGL078C	DBP3	TFIID	TFIID-dominated
YJL168C	SET2	TFIID	TFIID-dominated
YMR037C	MSN2	CR	TFIID-dominated
YLR221C	RSA3	TFIID	TFIID-dominated
YML038C	YMD8	TFIID	TFIID-dominated
YOR224C	RPB8	TFIID	TFIID-dominated
YNL091W	NST1	TFIID	TFIID-dominated
YGR167W	CLC1	TFIID	TFIID-dominated
YGL188C-A	YGL188C-A	TFIID
YFR050C	PRE4	TFIID	TFIID-dominated
YKL104C	GFA1	TFIID	TFIID-dominated
YDR062W	LCB2	TFIID	TFIID-dominated
YOR247W	SRL1	CR	TFIID-dominated
YML081C-A	ATP18	TFIID
YCR033W	SNT1	TFIID	TFIID-dominated
YJL012C	VTC4	CR	TFIID-dominated
YKL080W	VMA5	TFIID	TFIID-dominated
YOR326W	MYO2	TFIID	TFIID-dominated
YCR082W	AHC2	TFIID	TFIID-dominated
YLR432W	IMD3	CR	TFIID-dominated
YMR173W	DDR48	CR	SAGA-dominated
YBR029C	CDS1	TFIID	TFIID-dominated
YPL090C	RPS6A	TFIID	TFIID-dominated
YBR199W	KTR4	TFIID	TFIID-dominated
YER006W	NUG1	TFIID	TFIID-dominated
YDL067C	COX9	TFIID	TFIID-dominated
YDR280W	RRP45	TFIID	TFIID-dominated
YHR190W	ERG9	CR	TFIID-dominated
YBL030C	PET9	CR	SAGA-dominated
YOR209C	NPT1	TFIID	TFIID-dominated
YMR015C	ERG5	CR	TFIID-dominated
YLL029W	FRA1	TFIID	TFIID-dominated
YPR137W	RRP9	TFIID	TFIID-dominated
YGL228W	SHE10	TFIID	TFIID-dominated
YDR293C	SSD1	TFIID	TFIID-dominated
YGL048C	RPT6	TFIID	TFIID-dominated
YLR262C-A	TMA7	TFIID
YEL031W	SPF1	TFIID	TFIID-dominated
YNL098C	RAS2	TFIID	TFIID-dominated
YGR204W	ADE3	CR	SAGA-dominated
YEL013W	VAC8	TFIID	TFIID-dominated
YER030W	CHZ1	TFIID	TFIID-dominated
YFL005W	SEC4	TFIID	TFIID-dominated
YOL029C	YOL029C	TFIID	TFIID-dominated
YNL157W	IGO1	TFIID	SAGA-dominated
YCL064C	CHA1	CR	TFIID-dominated
YMR125W	STO1	TFIID	TFIID-dominated
YJL061W	NUP82	TFIID	TFIID-dominated
YOR046C	DBP5	TFIID	TFIID-dominated
YJL138C	TIF2	CR	TFIID-dominated
YFR031C-A	RPL2A	TFIID	TFIID-dominated
YJR139C	HOM6	TFIID	TFIID-dominated
YOL004W	SIN3	TFIID	TFIID-dominated
YPR033C	HTS1	TFIID	TFIID-dominated
YJL140W	RPB4	TFIID	TFIID-dominated
YER112W	LSM4	TFIID	TFIID-dominated
YGL114W	YGL114W	CR	TFIID-dominated
YOR051C	ETT1	TFIID	TFIID-dominated
YML129C	COX14	TFIID	TFIID-dominated
YDR211W	GCD6	TFIID	TFIID-dominated
YKL181W	PRS1	TFIID	TFIID-dominated
YDL191W	RPL35A	TFIID	TFIID-dominated
YDR483W	KRE2	TFIID	TFIID-dominated
YJL167W	ERG20	CR	TFIID-dominated
YCR020W-B	HTL1	TFIID
YBR279W	PAF1	TFIID	TFIID-dominated
YJL174W	KRE9	TFIID	TFIID-dominated
YJR145C	RPS4A	TFIID	TFIID-dominated
YOR260W	GCD1	TFIID	TFIID-dominated
YOR317W	FAA1	TFIID	SAGA/TFIID
YNL037C	IDH1	CR	SAGA-dominated
YER049W	TPA1	TFIID	TFIID-dominated
YBR031W	RPL4A	TFIID	TFIID-dominated
YKL016C	ATP7	TFIID	TFIID-dominated
YOR184W	SER1	CR	TFIID-dominated
YER141W	COX15	TFIID	TFIID-dominated
YLR106C	MDN1	TFIID	TFIID-dominated
YER155C	BEM2	TFIID	TFIID-dominated
YGR065C	VHT1	CR	TFIID-dominated
YDR309C	GIC2	CR	SAGA-dominated
YER110C	KAP123	TFIID	TFIID-dominated
YHR019C	DED81	TFIID	TFIID-dominated
YDR372C	VPS74	TFIID	TFIID-dominated
YBR071W	YBR071W	CR	SAGA-dominated
YDR308C	SRB7	TFIID	TFIID-dominated
YKL160W	ELF1	TFIID	TFIID-dominated
YDL132W	CDC53	TFIID	TFIID-dominated
YPR062W	FCY1	TFIID	TFIID-dominated
YOR123C	LEO1	TFIID	TFIID-dominated
YDL066W	IDP1	CR	TFIID-dominated
YBL004W	UTP20	TFIID	TFIID-dominated
YCR028C-A	RIM1	TFIID
YNL137C	NAM9	TFIID	TFIID-dominated
YPL158C	AIM44	CR	TFIID-dominated
YLR244C	MAP1	TFIID	TFIID-dominated
YPR028W	YOP1	CR	TFIID-dominated
YNL084C	END3	TFIID	TFIID-dominated
YGR270W	YTA7	TFIID	TFIID-dominated
YOL081W	IRA2	TFIID	TFIID-dominated
YDR074W	TPS2	CR	TFIID-dominated
YBL051C	PIN4	TFIID	TFIID-dominated
YGL137W	SEC27	TFIID	TFIID-dominated
YBL047C	EDE1	TFIID	TFIID-dominated
YLR196W	PWP1	TFIID	TFIID-dominated
YDL195W	SEC31	TFIID	TFIID-dominated
YGL252C	RTG2	TFIID	TFIID-dominated
YKR066C	CCP1	CR	TFIID-dominated
YHR208W	BAT1	TFIID	TFIID-dominated
YNL307C	MCK1	TFIID	TFIID-dominated
YIR017C	MET28	CR	TFIID-dominated
YPL126W	NAN1	TFIID	TFIID-dominated
YDR529C	QCR7	TFIID	TFIID-dominated
YDL134C	PPH21	TFIID	TFIID-dominated
YLR025W	SNF7	TFIID	TFIID-dominated
YDL136W	RPL35B	TFIID	TFIID-dominated
YDR168W	CDC37	TFIID	TFIID-dominated
YJR076C	CDC11	TFIID	TFIID-dominated
YDR025W	RPS11A	TFIID	TFIID-dominated
YOR194C	TOA1	TFIID	TFIID-dominated
YMR311C	GLC8	TFIID	TFIID-dominated
YGR187C	HGH1	TFIID	TFIID-dominated
YOR014W	RTS1	TFIID	TFIID-dominated
YHR089C	GAR1	TFIID	TFIID-dominated
YLR406C	RPL31B	TFIID	no call
YPL235W	RVB2	TFIID	TFIID-dominated
YLR399C	BDF1	CR	SAGA-dominated
YPL169C	MEX67	TFIID	TFIID-dominated
YBR221C	PDB1	TFIID	TFIID-dominated
YMR195W	ICY1	CR	SAGA-dominated
YMR266W	RSN1	CR	SAGA-dominated
YFR001W	LOC1	TFIID	TFIID-dominated
YBL079W	NUP170	TFIID	no call
YDL031W	DBP10	TFIID	TFIID-dominated
YLR387C	REH1	TFIID	TFIID-dominated
YFR030W	MET10	TFIID	TFIID-dominated
YBR191W	RPL21A	TFIID	TFIID-dominated
YLR449W	FPR4	TFIID	TFIID-dominated
YGR281W	YOR1	CR	SAGA-dominated
YDR404C	RPB7	TFIID	TFIID-dominated
YPL063W	TIM50	TFIID	TFIID-dominated
YML108W	YML108W	TFIID	TFIID-dominated
YHR205W	SCH9	TFIID	TFIID-dominated
YDL153C	SAS10	TFIID	TFIID-dominated
YLR452C	SST2	CR	TFIID-dominated
YJL158C	CIS3	CR	SAGA/TFIID
YLL018C	DPS1	TFIID	TFIID-dominated
YDR069C	DOA4	CR	TFIID-dominated
YBR039W	ATP3	TFIID	TFIID-dominated
YGL167C	PMR1	TFIID	no call
YHR068W	DYS1	TFIID	TFIID-dominated
YBR207W	FTH1	TFIID	TFIID-dominated
YER125W	RSP5	TFIID	TFIID-dominated
YDR303C	RSC3	TFIID	TFIID-dominated
YGL092W	NUP145	TFIID	TFIID-dominated
YJL123C	MTC1	TFIID	TFIID-dominated
YOL097C	WRS1	TFIID	TFIID-dominated
YOR362C	PRE10	TFIID	TFIID-dominated
YKL007W	CAP1	TFIID	TFIID-dominated
YHR066W	SSF1	TFIID	TFIID-dominated
YGR119C	NUP57	TFIID	TFIID-dominated
YDR324C	UTP4	TFIID	TFIID-dominated
YGL202W	ARO8	TFIID	TFIID-dominated
YDR322C-A	TIM11	TFIID
YKL195W	MIA40	TFIID	TFIID-dominated
YDR052C	DBF4	TFIID	TFIID-dominated
YDR245W	MNN10	TFIID	TFIID-dominated
YML008C	ERG6	CR	TFIID-dominated
YMR083W	ADH3	TFIID	TFIID-dominated
YBR172C	SMY2	TFIID	TFIID-dominated
YJR137C	MET5	TFIID	TFIID-dominated
YML053C	YML053C	TFIID	TFIID-dominated
YDL100C	GET3	TFIID	TFIID-dominated
YLR208W	SEC13	TFIID	TFIID-dominated
YDR145W	TAF12	TFIID	TFIID-dominated
YDR412W	RRP17	TFIID	TFIID-dominated
YHR098C	SFB3	TFIID	TFIID-dominated
YGR284C	ERV29	TFIID	TFIID-dominated
YML117W	NAB6	TFIID	TFIID-dominated
YIL109C	SEC24	TFIID	TFIID-dominated
YOR182C	RPS30B	TFIID	TFIID-dominated
YML072C	TCB3	TFIID	TFIID-dominated
YDL205C	HEM3	CR	TFIID-dominated
YDR208W	MSS4	TFIID	TFIID-dominated
YLR403W	SFP1	TFIID	TFIID-dominated
YNL302C	RPS19B	TFIID	TFIID-dominated
YOR058C	ASE1	TFIID	TFIID-dominated
YDR251W	PAM1	TFIID	TFIID-dominated
YDR361C	BCP1	TFIID	TFIID-dominated
YDR170C	SEC7	TFIID	TFIID-dominated
YHR023W	MYO1	TFIID	TFIID-dominated
YPL218W	SAR1	TFIID	TFIID-dominated
YLR309C	IMH1	TFIID	TFIID-dominated
YHR010W	RPL27A	TFIID	TFIID-dominated
YJR073C	OPI3	CR	TFIID-dominated
YLR192C	HCR1	TFIID	TFIID-dominated
YDL004W	ATP16	TFIID	TFIID-dominated
YJR002W	MPP10	TFIID	TFIID-dominated
YMR033W	ARP9	TFIID	TFIID-dominated
YNL247W	YNL247W	TFIID	TFIID-dominated
YOR047C	STD1	CR	TFIID-dominated
YGL026C	TRP5	TFIID	TFIID-dominated
YCR002C	CDC10	TFIID	TFIID-dominated
YLR435W	TSR2	TFIID	TFIID-dominated
YGR189C	CRH1	CR	SAGA-dominated
YDL015C	TSC13	TFIID	TFIID-dominated
YDR457W	TOM1	TFIID	TFIID-dominated
YKL135C	APL2	TFIID	TFIID-dominated
YKL142W	MRP8	TFIID	TFIID-dominated
YJR065C	ARP3	TFIID	TFIID-dominated
YKL086W	SRX1	CR	no call
YDL051W	LHP1	TFIID	TFIID-dominated
YLR129W	DIP2	TFIID	TFIID-dominated
YKL014C	URB1	TFIID	TFIID-dominated
YJL039C	NUP192	TFIID	TFIID-dominated
YJL122W	ALB1	TFIID	TFIID-dominated
YGL070C	RPB9	TFIID	TFIID-dominated
YLL051C	FRE6	TFIID	TFIID-dominated
YER180C-A	SLO1	TFIID
YER042W	MXR1	CR	TFIID-dominated
YDL161W	ENT1	TFIID	TFIID-dominated
YKL077W	YKL077W	TFIID	TFIID-dominated
YLR170C	APS1	TFIID	TFIID-dominated
YMR216C	SKY1	TFIID	TFIID-dominated
YLR223C	IFH1	TFIID	TFIID-dominated
YNL271C	BNI1	TFIID	TFIID-dominated
YGL225W	VRG4	TFIID	TFIID-dominated
YLR206W	ENT2	TFIID	TFIID-dominated
YER117W	RPL23B	TFIID	TFIID-dominated
YNR035C	ARC35	TFIID	TFIID-dominated
YGL117W	YGL117W	CR	SAGA-dominated
YOR187W	TUF1	TFIID	TFIID-dominated
YMR109W	MYO5	TFIID	TFIID-dominated
YNL213C	RRG9	TFIID	TFIID-dominated
YNL055C	POR1	CR	TFIID-dominated
YOL038W	PRE6	TFIID	TFIID-dominated
YER161C	SPT2	TFIID	TFIID-dominated
YJL179W	PFD1	TFIID	TFIID-dominated
YLR225C	YLR225C	CR	no call
YLL048C	YBT1	TFIID	TFIID-dominated
YDR300C	PRO1	TFIID	TFIID-dominated
YPR133C	SPN1	TFIID	TFIID-dominated
YHL047C	ARN2	CR	TFIID-dominated
YML048W	GSF2	CR	TFIID-dominated
YOL076W	MDM20	TFIID	TFIID-dominated
YPR173C	VPS4	TFIID	TFIID-dominated
YIL128W	MET18	TFIID	TFIID-dominated
YLR378C	SEC61	TFIID	TFIID-dominated
YKR001C	VPS1	TFIID	TFIID-dominated
YHR081W	LRP1	TFIID	TFIID-dominated
YNL175C	NOP13	TFIID	TFIID-dominated
YFR009W	GCN20	TFIID	TFIID-dominated
YDL022W	GPD1	CR	SAGA-dominated
YGL068W	MNP1	TFIID	TFIID-dominated
YBR112C	CYC8	TFIID	TFIID-dominated
YMR080C	NAM7	TFIID	TFIID-dominated
YGR214W	RPS0A	TFIID	TFIID-dominated
YPR029C	APL4	TFIID	TFIID-dominated
YER086W	ILV1	TFIID	TFIID-dominated
YMR200W	ROT1	TFIID	TFIID-dominated
YDR432W	NPL3	TFIID	TFIID-dominated
YCR035C	RRP43	TFIID	TFIID-dominated
YMR031C	EIS1	CR	TFIID-dominated
YLR250W	SSP120	TFIID	TFIID-dominated
YKR035W-A	DID2	TFIID
YIL027C	EMC5	TFIID	TFIID-dominated
YHL040C	ARN1	CR	TFIID-dominated
YCR016W	YCR016W	TFIID	TFIID-dominated
YGR271C-A	EFG1	TFIID
YDL121C	YDL121C	TFIID	TFIID-dominated
YPR148C	YPR148C	TFIID	TFIID-dominated
YLR330W	CHS5	TFIID	TFIID-dominated
YLR222C	UTP13	TFIID	TFIID-dominated
YDR510W	SMT3	TFIID	TFIID-dominated
YIL040W	APQ12	TFIID	TFIID-dominated
YDL002C	NHP10	TFIID	TFIID-dominated
YNR001C	CIT1	CR	SAGA-dominated
YDL099W	BUG1	TFIID	TFIID-dominated
YDR339C	FCF1	TFIID	TFIID-dominated
YMR043W	MCM1	CR	TFIID-dominated
YML069W	POB3	TFIID	TFIID-dominated
YLR168C	UPS2	CR	SAGA-dominated
YML010W	SPT5	TFIID	TFIID-dominated
YLL009C	COX17	TFIID	TFIID-dominated
YEL015W	EDC3	TFIID	TFIID-dominated
YLL008W	DRS1	TFIID	TFIID-dominated
YBR173C	UMP1	TFIID	TFIID-dominated
YIL130W	ASG1	TFIID	TFIID-dominated
YGR083C	GCD2	TFIID	no call
YOR028C	CIN5	CR	SAGA/TFIID
YER138W-A	YER138W-A	CR
YIL074C	SER33	TFIID	TFIID-dominated
YJR064W	CCT5	TFIID	TFIID-dominated
YOR239W	ABP140	TFIID	TFIID-dominated
YMR049C	ERB1	TFIID	TFIID-dominated
YNL186W	UBP10	TFIID	TFIID-dominated
YGR105W	VMA21	TFIID	TFIID-dominated
YPL010W	RET3	TFIID	TFIID-dominated
YPR112C	MRD1	TFIID	TFIID-dominated
YBR248C	HIS7	TFIID	SAGA-dominated
YNL077W	APJ1	TFIID	no call
YOR020W-A	YOR020W-A	TFIID
YPL032C	SVL3	TFIID	TFIID-dominated
YDL225W	SHS1	TFIID	TFIID-dominated
YGR180C	RNR4	CR	SAGA/TFIID
YKL212W	SAC1	TFIID	TFIID-dominated
YMR290C	HAS1	TFIID	TFIID-dominated
YLR256W	HAP1	CR	TFIID-dominated
YJR090C	GRR1	TFIID	TFIID-dominated
YBR048W	RPS11B	CR	TFIID-dominated
YHR088W	RPF1	TFIID	TFIID-dominated
YHL036W	MUP3	CR	TFIID-dominated
YIL036W	CST6	TFIID	TFIID-dominated
YBL105C	PKC1	TFIID	no call
YJR044C	VPS55	TFIID	TFIID-dominated
YNL176C	TDA7	CR	TFIID-dominated
YOR158W	PET123	TFIID	TFIID-dominated
YKL175W	ZRT3	TFIID	TFIID-dominated
YGL086W	MAD1	TFIID	TFIID-dominated
YER105C	NUP157	TFIID	TFIID-dominated
YEL022W	GEA2	TFIID	TFIID-dominated
YBR017C	KAP104	TFIID	no call
YPR144C	NOC4	TFIID	TFIID-dominated
YBR171W	SEC66	TFIID	TFIID-dominated
YDL088C	ASM4	TFIID	TFIID-dominated
YEL002C	WBP1	TFIID	TFIID-dominated
YHR039C-A	VMA10	TFIID
YNL123W	NMA111	TFIID	TFIID-dominated
YIL144W	NDC80	TFIID	TFIID-dominated
YFL034C-A	RPL22B	TFIID	TFIID-dominated
YNL177C	MRPL22	TFIID	TFIID-dominated
YLR153C	ACS2	CR	SAGA-dominated
YPR048W	TAH18	TFIID	TFIID-dominated
YPL217C	BMS1	TFIID	TFIID-dominated
YLR200W	YKE2	TFIID	TFIID-dominated
YJL076W	NET1	TFIID	no call
YER056C-A	RPL34A	TFIID	TFIID-dominated
YLR163C	MAS1	TFIID	TFIID-dominated
YLR022C	SDO1	TFIID	TFIID-dominated
YER068W	MOT2	TFIID	TFIID-dominated
YPR060C	ARO7	TFIID	TFIID-dominated
YHL020C	OPI1	TFIID	TFIID-dominated
YDL005C	MED2	TFIID	TFIID-dominated
YIL105C	SLM1	TFIID	TFIID-dominated
YMR010W	YMR010W	TFIID	TFIID-dominated
YAL029C	MYO4	TFIID	TFIID-dominated
YJL026W	RNR2	CR	SAGA/TFIID
YGR009C	SEC9	TFIID	TFIID-dominated
YMR090W	YMR090W	CR	SAGA-dominated
YOL028C	YAP7	TFIID	TFIID-dominated
YIL076W	SEC28	TFIID	TFIID-dominated
YBL058W	SHP1	TFIID	TFIID-dominated
YBR047W	FMP23	TFIID	no call
YBR069C	TAT1	CR	TFIID-dominated
YOL036W	YOL036W	TFIID	TFIID-dominated
YER050C	RSM18	TFIID	TFIID-dominated
YCR084C	TUP1	TFIID	TFIID-dominated
YOL064C	MET22	TFIID	TFIID-dominated
YLR034C	SMF3	CR	TFIID-dominated
YPR101W	SNT309	TFIID	TFIID-dominated
YLR229C	CDC42	TFIID	TFIID-dominated
YJR070C	LIA1	TFIID	TFIID-dominated
YPR168W	NUT2	TFIID	TFIID-dominated
YLR287C	YLR287C	TFIID	TFIID-dominated
YKL032C	IXR1	TFIID	TFIID-dominated
YGR233C	PHO81	TFIID	TFIID-dominated
YDR354W	TRP4	TFIID	TFIID-dominated
YJR004C	SAG1	CR	SAGA/TFIID
YKR016W	MIC60	TFIID	TFIID-dominated
YGL071W	AFT1	TFIID	TFIID-dominated
YLL039C	UBI4	CR	no call
YER094C	PUP3	TFIID	TFIID-dominated
YDL065C	PEX19	TFIID	TFIID-dominated
YOR141C	ARP8	TFIID	TFIID-dominated
YLL027W	ISA1	CR	SAGA-dominated
YER120W	SCS2	TFIID	TFIID-dominated
YOR045W	TOM6	TFIID	TFIID-dominated
YBR046C	ZTA1	CR	TFIID-dominated
YKR068C	BET3	TFIID	TFIID-dominated
YDL155W	CLB3	TFIID	TFIID-dominated
YOR116C	RPO31	TFIID	TFIID-dominated
YJL166W	QCR8	TFIID	TFIID-dominated
YDL106C	PHO2	TFIID	TFIID-dominated
YER151C	UBP3	TFIID	TFIID-dominated
YDR525W-A	SNA2	TFIID
YBR164C	ARL1	TFIID	TFIID-dominated
YDR129C	SAC6	TFIID	TFIID-dominated
YDL190C	UFD2	TFIID	TFIID-dominated
YDR449C	UTP6	TFIID	TFIID-dominated
YMR091C	NPL6	TFIID	TFIID-dominated
YDR356W	SPC110	TFIID	TFIID-dominated
YDR266C	HEL2	TFIID	TFIID-dominated
YEL055C	POL5	TFIID	TFIID-dominated
YGL120C	PRP43	TFIID	TFIID-dominated
YMR014W	BUD22	TFIID	TFIID-dominated
YKR043C	SHB17	TFIID	TFIID-dominated
YDR292C	SRP101	TFIID	TFIID-dominated
YDR165W	TRM82	TFIID	TFIID-dominated
YLR027C	AAT2	CR	SAGA-dominated
YDR188W	CCT6	TFIID	TFIID-dominated
YLR335W	NUP2	TFIID	TFIID-dominated
YNL243W	SLA2	TFIID	TFIID-dominated
YOR195W	SLK19	TFIID	TFIID-dominated
YBR198C	TAF5	TFIID	TFIID-dominated
YJL144W	YJL144W	CR	SAGA-dominated
YNL267W	PIK1	TFIID	TFIID-dominated
YPR086W	SUA7	TFIID	TFIID-dominated
YLL011W	SOF1	TFIID	TFIID-dominated
YPR167C	MET16	TFIID	TFIID-dominated
YLR083C	EMP70	TFIID	TFIID-dominated
YNL169C	PSD1	CR	TFIID-dominated
YPL129W	TAF14	TFIID	TFIID-dominated
YGR089W	NNF2	TFIID	TFIID-dominated
YOR281C	PLP2	TFIID	TFIID-dominated
YOL061W	PRS5	TFIID	TFIID-dominated
YGR026W	YGR026W	TFIID	TFIID-dominated
YMR197C	VTI1	TFIID	TFIID-dominated
YGR061C	ADE6	TFIID	TFIID-dominated
YOR061W	CKA2	TFIID	TFIID-dominated
YML018C	YML018C	TFIID	TFIID-dominated
YNR061C	YNR061C	TFIID	TFIID-dominated
YLR436C	ECM30	TFIID	TFIID-dominated
YDR186C	YDR186C	TFIID	TFIID-dominated
YNL059C	ARP5	TFIID	TFIID-dominated
YGL115W	SNF4	TFIID	TFIID-dominated
YCL035C	GRX1	TFIID	SAGA-dominated
YNL103W	MET4	TFIID	TFIID-dominated
YBR247C	ENP1	TFIID	TFIID-dominated
YDL224C	WHI4	TFIID	TFIID-dominated
YPL009C	RQC2	TFIID	TFIID-dominated
YNL032W	SIW14	TFIID	TFIID-dominated
YDR101C	ARX1	TFIID	TFIID-dominated
YER019C-A	SBH2	TFIID	TFIID-dominated
YLR384C	IKI3	TFIID	TFIID-dominated
YJR005W	APL1	TFIID	TFIID-dominated
YOR147W	MDM32	TFIID	TFIID-dominated
YPR113W	PIS1	CR	TFIID-dominated
YAR002C-A	ERP1	TFIID	no call
YIL052C	RPL34B	TFIID	TFIID-dominated
YOR098C	NUP1	TFIID	TFIID-dominated
YGL080W	MPC1	TFIID	TFIID-dominated
YHL001W	RPL14B	TFIID	TFIID-dominated
YLL010C	PSR1	TFIID	TFIID-dominated
YER048C	CAJ1	TFIID	TFIID-dominated
YDR257C	RKM4	TFIID	TFIID-dominated
YGR078C	PAC10	TFIID	TFIID-dominated
YHR108W	GGA2	TFIID	TFIID-dominated
YCR077C	PAT1	TFIID	TFIID-dominated
YEL063C	CAN1	TFIID	SAGA-dominated
YML004C	GLO1	TFIID	SAGA-dominated
YPR163C	TIF3	TFIID	TFIID-dominated
YGR134W	CAF130	TFIID	TFIID-dominated
YJR060W	CBF1	TFIID	TFIID-dominated
YBL039C	URA7	TFIID	TFIID-dominated
YBR181C	RPS6B	TFIID	TFIID-dominated
YNL155W	CUZ1	TFIID	TFIID-dominated
YHL003C	LAG1	TFIID	TFIID-dominated
YIL021W	RPB3	TFIID	TFIID-dominated
YFR039C	OSW7	TFIID	TFIID-dominated
YKL088W	CAB3	TFIID	TFIID-dominated
YDL058W	USO1	TFIID	TFIID-dominated
YJL154C	VPS35	TFIID	TFIID-dominated
YGR186W	TFG1	TFIID	TFIID-dominated
YJL041W	NSP1	TFIID	TFIID-dominated
YKR082W	NUP133	TFIID	TFIID-dominated
YDR176W	NGG1	TFIID	TFIID-dominated
YCR008W	SAT4	TFIID	TFIID-dominated
YOR327C	SNC2	TFIID	TFIID-dominated
YCR106W	RDS1	TFIID	TFIID-dominated
YMR054W	STV1	TFIID	TFIID-dominated
YOR342C	YOR342C	TFIID	SAGA-dominated
YLR190W	MMR1	TFIID	TFIID-dominated
YHR065C	RRP3	TFIID	TFIID-dominated
YAR002W	NUP60	TFIID	TFIID-dominated
YLR008C	PAM18	TFIID	TFIID-dominated
YJL171C	YJL171C	CR	SAGA-dominated
YDR351W	SBE2	TFIID	TFIID-dominated
YPL228W	CET1	TFIID	TFIID-dominated
YGR145W	ENP2	TFIID	TFIID-dominated
YMR062C	ARG7	TFIID	TFIID-dominated
YDR003W	RCR2	TFIID	TFIID-dominated
YDR519W	FPR2	TFIID	TFIID-dominated
YHR099W	TRA1	TFIID	TFIID-dominated
YKL065C	YET1	TFIID	TFIID-dominated
YKL094W	YJU3	TFIID	TFIID-dominated
YGR033C	TIM21	TFIID	TFIID-dominated
YMR100W	MUB1	TFIID	TFIID-dominated
YHR199C	AIM46	CR	TFIID-dominated
YKL020C	SPT23	TFIID	TFIID-dominated
YIL022W	TIM44	TFIID	TFIID-dominated
YJL143W	TIM17	TFIID	TFIID-dominated
YLR409C	UTP21	TFIID	TFIID-dominated
YJL117W	PHO86	TFIID	TFIID-dominated
YPL094C	SEC62	TFIID	TFIID-dominated
YGL014W	PUF4	TFIID	TFIID-dominated
YHR111W	UBA4	TFIID	TFIID-dominated
YGR040W	KSS1	CR	TFIID-dominated
YIL115C	NUP159	TFIID	TFIID-dominated
YPL013C	MRPS16	TFIID	TFIID-dominated
YJL050W	MTR4	TFIID	TFIID-dominated
YLR395C	COX8	TFIID	TFIID-dominated
YJL145W	SFH5	TFIID	TFIID-dominated
YLR056W	ERG3	CR	SAGA-dominated
YJR016C	ILV3	CR	TFIID-dominated
YNL149C	PGA2	TFIID	TFIID-dominated
YGR198W	YPP1	TFIID	TFIID-dominated
YLR295C	ATP14	TFIID	TFIID-dominated
YOR207C	RET1	TFIID	TFIID-dominated
YJL212C	OPT1	CR	TFIID-dominated
YPL259C	APM1	TFIID	TFIID-dominated
YDR083W	RRP8	TFIID	TFIID-dominated
YLR058C	SHM2	TFIID	SAGA-dominated
YKL205W	LOS1	TFIID	TFIID-dominated
YLR398C	SKI2	TFIID	TFIID-dominated
YPR159W	KRE6	TFIID	TFIID-dominated
YLR359W	ADE13	TFIID	SAGA-dominated
YLR344W	RPL26A	TFIID	TFIID-dominated
YJR046W	TAH11	TFIID	TFIID-dominated
YCR057C	PWP2	TFIID	TFIID-dominated
YGL150C	INO80	TFIID	TFIID-dominated
YBL036C	YBL036C	TFIID	TFIID-dominated
YMR243C	ZRC1	TFIID	TFIID-dominated
YHR103W	SBE22	TFIID	TFIID-dominated
YIL070C	MAM33	TFIID	TFIID-dominated
YDR452W	PPN1	TFIID	TFIID-dominated
YDL047W	SIT4	TFIID	TFIID-dominated
YDL040C	NAT1	TFIID	TFIID-dominated
YMR089C	YTA12	TFIID	TFIID-dominated
YDR055W	PST1	CR	SAGA-dominated
YOL006C	TOP1	TFIID	TFIID-dominated
YGR193C	PDX1	TFIID	TFIID-dominated
YBR059C	AKL1	TFIID	TFIID-dominated
YNR043W	MVD1	TFIID	TFIID-dominated
YJR010W	MET3	TFIID	TFIID-dominated
YPL028W	ERG10	TFIID	TFIID-dominated
YJR041C	URB2	TFIID	TFIID-dominated
YDR385W	EFT2	TFIID	TFIID-dominated
YOR304W	ISW2	TFIID	TFIID-dominated
YDR045C	RPC11	TFIID	TFIID-dominated
YOR216C	RUD3	TFIID	TFIID-dominated
YDR472W	TRS31	TFIID	TFIID-dominated
YJL004C	SYS1	TFIID	TFIID-dominated
YDR463W	STP1	TFIID	TFIID-dominated
YDL111C	RRP42	TFIID	TFIID-dominated
YKL068W	NUP100	TFIID	TFIID-dominated
YGR178C	PBP1	TFIID	TFIID-dominated
YPL137C	GIP3	TFIID	TFIID-dominated
YOR222W	ODC2	CR	TFIID-dominated
YGR060W	ERG25	CR	SAGA-dominated
YOR107W	RGS2	CR	SAGA-dominated
YAR014C	BUD14	TFIID	TFIID-dominated
YDR320C-A	DAD4	TFIID
YFR037C	RSC8	TFIID	TFIID-dominated
YBR088C	POL30	CR	SAGA-dominated
YHR206W	SKN7	TFIID	TFIID-dominated
YDR068W	DOS2	TFIID	TFIID-dominated
YCL059C	KRR1	TFIID	TFIID-dominated
YOR305W	RRG7	TFIID	TFIID-dominated
YJL128C	PBS2	TFIID	TFIID-dominated
YHR148W	IMP3	TFIID	TFIID-dominated
YAL007C	ERP2	TFIID	TFIID-dominated
YGL184C	STR3	CR	SAGA-dominated
YHR104W	GRE3	CR	TFIID-dominated
YLR418C	CDC73	TFIID	TFIID-dominated
YNL258C	DSL1	TFIID	TFIID-dominated
YPR089W	YPR089W	TFIID	TFIID-dominated
YLL013C	PUF3	TFIID	TFIID-dominated
YOL051W	GAL11	TFIID	TFIID-dominated
YMR047C	NUP116	TFIID	TFIID-dominated
YDR298C	ATP5	TFIID	TFIID-dominated
YOL098C	YOL098C	TFIID	TFIID-dominated
YAL041W	CDC24	TFIID	TFIID-dominated
YOR243C	PUS7	TFIID	TFIID-dominated
YGR195W	SKI6	TFIID	TFIID-dominated
YHL007C	STE20	TFIID	TFIID-dominated
YLR248W	RCK2	TFIID	TFIID-dominated
YKL101W	HSL1	CR	TFIID-dominated
YOL126C	MDH2	CR	SAGA-dominated
YBR256C	RIB5	CR	TFIID-dominated
YGR280C	PXR1	TFIID	TFIID-dominated
YFL008W	SMC1	TFIID	SAGA-dominated
YBL026W	LSM2	TFIID	no call
YPL271W	ATP15	TFIID	TFIID-dominated
YLR314C	CDC3	TFIID	TFIID-dominated
YOL119C	MCH4	CR	SAGA-dominated
YMR319C	FET4	CR	TFIID-dominated
YLR224W	YLR224W	TFIID	TFIID-dominated
YNL138W	SRV2	TFIID	TFIID-dominated
YLR410W	VIP1	TFIID	TFIID-dominated
YDR227W	SIR4	TFIID	TFIID-dominated
YGL101W	YGL101W	TFIID	TFIID-dominated
YBR249C	ARO4	CR	SAGA/TFIID
YNR067C	DSE4	CR	SAGA-dominated
YNL001W	DOM34	TFIID	TFIID-dominated
YDR006C	SOK1	TFIID	TFIID-dominated
YBR287W	YBR287W	TFIID	SAGA-dominated
YNL004W	HRB1	TFIID	TFIID-dominated
YKL190W	CNB1	TFIID	TFIID-dominated
YOR162C	YRR1	TFIID	TFIID-dominated
YOR212W	STE4	TFIID	TFIID-dominated
YGR191W	HIP1	TFIID	TFIID-dominated
YER008C	SEC3	TFIID	TFIID-dominated
YKL058W	TOA2	TFIID	TFIID-dominated
YGL246C	RAI1	TFIID	TFIID-dominated
YNL132W	KRE33	TFIID	TFIID-dominated
YOR244W	ESA1	TFIID	TFIID-dominated
YDR507C	GIN4	TFIID	SAGA-dominated
YKL061W	BLI1	TFIID	TFIID-dominated
YJR003C	YJR003C	CR	TFIID-dominated
YNL263C	YIF1	TFIID	TFIID-dominated
YNL192W	CHS1	CR	SAGA-dominated
YJL036W	SNX4	TFIID	TFIID-dominated
YOL012C	HTZ1	TFIID	TFIID-dominated
YNL297C	MON2	TFIID	TFIID-dominated
YDL063C	SYO1	TFIID	TFIID-dominated
YBR036C	CSG2	TFIID	TFIID-dominated
YMR044W	IOC4	TFIID	TFIID-dominated
YDR500C	RPL37B	TFIID	TFIID-dominated
YOR354C	MSC6	TFIID	TFIID-dominated
YKL004W	AUR1	TFIID	TFIID-dominated
YPL011C	TAF3	TFIID	TFIID-dominated
YJL010C	NOP9	TFIID	TFIID-dominated
YDL212W	SHR3	TFIID	TFIID-dominated
YNL135C	FPR1	CR	TFIID-dominated
YNL130C	CPT1	CR	TFIID-dominated
YOL021C	DIS3	TFIID	TFIID-dominated
YGL108C	YGL108C	TFIID	TFIID-dominated
YDR169C	STB3	TFIID	TFIID-dominated
YNL313C	EMW1	TFIID	TFIID-dominated
YCR034W	ELO2	TFIID	TFIID-dominated
YML001W	YPT7	TFIID
YDL171C	GLT1	TFIID	TFIID-dominated
YLR003C	CMS1	TFIID	TFIID-dominated
YER063W	THO1	TFIID	TFIID-dominated
YKR063C	LAS1	TFIID	TFIID-dominated
YDL072C	YET3	TFIID	TFIID-dominated
YKL176C	LST4	TFIID	TFIID-dominated
YIR033W	MGA2	TFIID	TFIID-dominated
YKL185W	ASH1	CR	SAGA-dominated
YKL044W	YKL044W	CR	SAGA-dominated
YDR005C	MAF1	TFIID	TFIID-dominated
YNL191W	DUG3	TFIID	TFIID-dominated
YNR019W	ARE2	CR	TFIID-dominated
YBL064C	PRX1	CR	SAGA-dominated
YNL041C	COG6	TFIID	TFIID-dominated
YKL143W	LTV1	TFIID	TFIID-dominated
YLR071C	RGR1	TFIID	TFIID-dominated
YLR026C	SED5	TFIID	TFIID-dominated
YNL272C	SEC2	TFIID	TFIID-dominated
YOR227W	HER1	CR	TFIID-dominated
YOR285W	RDL1	TFIID	TFIID-dominated
YKL087C	CYT2	TFIID	TFIID-dominated
YBR122C	MRPL36	TFIID	TFIID-dominated
YJR042W	NUP85	TFIID	no call
YCR003W	MRPL32	TFIID	TFIID-dominated
YLR028C	ADE16	TFIID	TFIID-dominated
YJL104W	PAM16	TFIID	TFIID-dominated
YDL226C	GCS1	TFIID	TFIID-dominated
YOR372C	NDD1	TFIID	TFIID-dominated
YOL020W	TAT2	TFIID	TFIID-dominated
YDR210W	YDR210W	CR	TFIID-dominated
YGR183C	QCR9	TFIID	TFIID-dominated
YDR262W	YDR262W	TFIID	TFIID-dominated
YML086C	ALO1	TFIID	TFIID-dominated
YIL041W	GVP36	TFIID	TFIID-dominated
YGR245C	SDA1	TFIID	TFIID-dominated
YNR038W	DBP6	TFIID	TFIID-dominated
YER022W	SRB4	TFIID	TFIID-dominated
YDL035C	GPR1	TFIID	no call
YJR125C	ENT3	TFIID	TFIID-dominated
YCL030C	HIS4	CR	SAGA-dominated
YLL021W	SPA2	TFIID	TFIID-dominated
YOR159C	SME1	TFIID	TFIID-dominated
YPL059W	GRX5	TFIID	TFIID-dominated
YLR052W	IES3	TFIID	TFIID-dominated
YGL106W	MLC1	TFIID	TFIID-dominated
YDR527W	RBA50	TFIID	TFIID-dominated
YIL112W	HOS4	TFIID	TFIID-dominated
YOR375C	GDH1	CR	TFIID-dominated
YOR165W	SEY1	TFIID	TFIID-dominated
YFL013C	IES1	TFIID	TFIID-dominated
YKL033W-A	YKL033W-A	TFIID
YNL221C	POP1	TFIID	TFIID-dominated
YEL003W	GIM4	TFIID	TFIID-dominated
YOR142W	LSC1	CR	TFIID-dominated
YBR126C	TPS1	CR	SAGA-dominated
YNR031C	SSK2	TFIID	TFIID-dominated
YMR001C-A	YMR001C-A	CR
YMR291W	TDA1	CR	SAGA-dominated
YMR093W	UTP15	TFIID	TFIID-dominated
YJL192C	SOP4	TFIID	TFIID-dominated
YMR212C	EFR3	TFIID	TFIID-dominated
YPR097W	YPR097W	TFIID	TFIID-dominated
YNL268W	LYP1	TFIID	TFIID-dominated
YLR336C	SGD1	TFIID	TFIID-dominated
YGL233W	SEC15	TFIID	TFIID-dominated
YGR207C	CIR1	TFIID	TFIID-dominated
YNL010W	YNL010W	TFIID	TFIID-dominated
YGR184C	UBR1	TFIID	TFIID-dominated
YPL195W	APL5	TFIID	TFIID-dominated
YDR378C	LSM6	TFIID	TFIID-dominated
YBR253W	SRB6	TFIID	TFIID-dominated
YIL056W	VHR1	CR	TFIID-dominated
YOR085W	OST3	TFIID	TFIID-dominated
YHR026W	VMA16	TFIID	TFIID-dominated
YDL112W	TRM3	TFIID	TFIID-dominated
YLR357W	RSC2	TFIID	TFIID-dominated
YDL198C	GGC1	CR	SAGA-dominated
YPR105C	COG4	TFIID	TFIID-dominated
YBR054W	YRO2	CR	SAGA-dominated
YOR311C	DGK1	TFIID	TFIID-dominated
YHR006W	STP2	TFIID	TFIID-dominated
YKR100C	SKG1	TFIID	TFIID-dominated
YGL013C	PDR1	TFIID	TFIID-dominated
YPL053C	KTR6	TFIID	TFIID-dominated
YJR134C	SGM1	TFIID	TFIID-dominated
YOR241W	MET7	TFIID	TFIID-dominated
YLL034C	RIX7	TFIID	TFIID-dominated
YGL038C	OCH1	CR	TFIID-dominated
YKL204W	EAP1	TFIID	TFIID-dominated
YDR146C	SWI5	TFIID	TFIID-dominated
YKR031C	SPO14	TFIID	TFIID-dominated
YPR125W	YLH47	TFIID	no call
YKR061W	KTR2	CR	SAGA-dominated
YMR255W	GFD1	TFIID	TFIID-dominated
YNL236W	SIN4	TFIID	TFIID-dominated
YOR191W	ULS1	TFIID	TFIID-dominated
YIL030C	SSM4	TFIID	TFIID-dominated
YBR179C	FZO1	TFIID	TFIID-dominated
YDR034C	LYS14	TFIID	TFIID-dominated
YDR219C	MFB1	TFIID	TFIID-dominated
YOR103C	OST2	TFIID	TFIID-dominated
YNL006W	LST8	TFIID	TFIID-dominated
YDR333C	RQC1	TFIID	TFIID-dominated
YDR027C	VPS54	TFIID	TFIID-dominated
YKR093W	PTR2	CR	SAGA-dominated
YHR020W	YHR020W	TFIID	TFIID-dominated
YJL098W	SAP185	TFIID	TFIID-dominated
YNL239W	LAP3	CR	TFIID-dominated
YEL061C	CIN8	TFIID	TFIID-dominated
YGL140C	YGL140C	TFIID	TFIID-dominated
YPR070W	MED1	TFIID	TFIID-dominated
YBL007C	SLA1	TFIID	TFIID-dominated
YNR068C	YNR068C	TFIID	TFIID-dominated
YBR142W	MAK5	TFIID	TFIID-dominated
YLR113W	HOG1	CR	TFIID-dominated
YER129W	SAK1	TFIID	TFIID-dominated
YNL252C	MRPL17	TFIID	TFIID-dominated
YER127W	LCP5	TFIID	TFIID-dominated
YDR087C	RRP1	TFIID	TFIID-dominated
YMR140W	SIP5	TFIID	TFIID-dominated
YDR515W	SLF1	TFIID	TFIID-dominated
YGR158C	MTR3	TFIID	TFIID-dominated
YOR376W-A	YOR376W-A	TFIID
YMR256C	COX7	TFIID	TFIID-dominated
YER092W	IES5	TFIID	TFIID-dominated
YHR201C	PPX1	TFIID	TFIID-dominated
YJL176C	SWI3	TFIID	TFIID-dominated
YFL036W	RPO41	TFIID	TFIID-dominated
YDR468C	TLG1	TFIID	TFIID-dominated
YDL003W	MCD1	CR	SAGA-dominated
YLR019W	PSR2	TFIID	TFIID-dominated
YDR407C	TRS120	TFIID	TFIID-dominated
YFL048C	EMP47	TFIID	TFIID-dominated
YLR181C	VTA1	TFIID	TFIID-dominated
YOR157C	PUP1	TFIID	TFIID-dominated
YGR200C	ELP2	TFIID	TFIID-dominated
YOR021C	SFM1	TFIID	TFIID-dominated
YDR328C	SKP1	TFIID	TFIID-dominated
YMR153W	NUP53	TFIID	TFIID-dominated
YER082C	UTP7	TFIID	TFIID-dominated
YJL196C	ELO1	CR	TFIID-dominated
YJL183W	MNN11	TFIID	TFIID-dominated
YDR081C	PDC2	TFIID	TFIID-dominated
YER166W	DNF1	TFIID	TFIID-dominated
YBR140C	IRA1	TFIID	TFIID-dominated
YJR091C	JSN1	TFIID	TFIID-dominated
YLR084C	RAX2	CR	TFIID-dominated
YJR092W	BUD4	TFIID	TFIID-dominated
YDR326C	YSP2	TFIID	TFIID-dominated
YBL085W	BOI1	TFIID	no call
YHR049W	FSH1	CR	TFIID-dominated
YNR022C	MRPL50	TFIID	TFIID-dominated
YLR182W	SWI6	TFIID	TFIID-dominated
YKR092C	SRP40	TFIID	TFIID-dominated
YIL094C	LYS12	TFIID	TFIID-dominated
YGL151W	NUT1	TFIID	TFIID-dominated
YGR072W	UPF3	TFIID	TFIID-dominated
YOR283W	YOR283W	TFIID	TFIID-dominated
YDR150W	NUM1	TFIID	TFIID-dominated
YHL002W	HSE1	TFIID	SAGA-dominated
YBR149W	ARA1	CR	SAGA-dominated
YGL090W	LIF1	TFIID	TFIID-dominated
YNL216W	RAP1	TFIID	TFIID-dominated
YLR023C	IZH3	TFIID	SAGA-dominated
YBL050W	SEC17	TFIID	TFIID-dominated
YKL154W	SRP102	TFIID	TFIID-dominated
YDL073W	YDL073W	TFIID	TFIID-dominated
YPL184C	MRN1	TFIID	TFIID-dominated
YIL091C	UTP25	TFIID	TFIID-dominated
YKL192C	ACP1	TFIID	TFIID-dominated
YJL207C	LAA1	TFIID	TFIID-dominated
YLR371W	ROM2	TFIID	TFIID-dominated
YKL213C	DOA1	TFIID	TFIID-dominated
YNL156C	NSG2	TFIID	TFIID-dominated
YDR390C	UBA2	TFIID	TFIID-dominated
YPR008W	HAA1	TFIID	TFIID-dominated
YNL039W	BDP1	TFIID	TFIID-dominated
YEL001C	IRC22	TFIID	TFIID-dominated
YDL085C-A	YDL085C-A	TFIID
YDR334W	SWR1	TFIID	TFIID-dominated
YLR133W	CKI1	TFIID	TFIID-dominated
YMR129W	POM152	TFIID	TFIID-dominated
YJL069C	UTP18	TFIID	TFIID-dominated
YOR323C	PRO2	TFIID	TFIID-dominated
YLR370C	ARC18	TFIID	TFIID-dominated
YMR305C	SCW10	CR	SAGA-dominated
YML031W	NDC1	TFIID	TFIID-dominated
YJR086W	STE18	TFIID	TFIID-dominated
YCR042C	TAF2	TFIID	TFIID-dominated
YGL091C	NBP35	TFIID	TFIID-dominated
YBR165W	UBS1	TFIID	TFIID-dominated
YJL082W	IML2	CR	SAGA-dominated
YER007C-A	TMA20	TFIID	TFIID-dominated
YPR100W	MRPL51	TFIID	TFIID-dominated
YNL219C	ALG9	TFIID	TFIID-dominated
YOR145C	PNO1	TFIID	TFIID-dominated
YOR048C	RAT1	TFIID	TFIID-dominated
YKR067W	GPT2	TFIID	SAGA-dominated
YDR166C	SEC5	TFIID	TFIID-dominated
YDR337W	MRPS28	TFIID	TFIID-dominated
YHR021C	RPS27B	TFIID	TFIID-dominated
YNL167C	SKO1	TFIID	TFIID-dominated
YEL007W	MIT1	CR	TFIID-dominated
YAL019W	FUN30	TFIID	TFIID-dominated
YOR124C	UBP2	TFIID	TFIID-dominated
YER176W	ECM32	TFIID	TFIID-dominated
YMR149W	SWP1	TFIID	TFIID-dominated
YMR064W	AEP1	TFIID	TFIID-dominated
YNL232W	CSL4	TFIID	TFIID-dominated
YOR004W	UTP23	TFIID	TFIID-dominated
YOR315W	SFG1	CR	TFIID-dominated
YDL167C	NRP1	TFIID	TFIID-dominated
YOR036W	PEP12	TFIID	SAGA-dominated
YGL231C	EMC4	TFIID	TFIID-dominated
YMR004W	MVP1	TFIID	TFIID-dominated
YGR082W	TOM20	TFIID	TFIID-dominated
YGR215W	RSM27	TFIID	TFIID-dominated
YDR177W	UBC1	TFIID	TFIID-dominated
YKL015W	PUT3	TFIID	TFIID-dominated
YEL037C	RAD23	TFIID	TFIID-dominated
YAL036C	RBG1	TFIID	TFIID-dominated
YLR195C	NMT1	TFIID	TFIID-dominated
YER164W	CHD1	TFIID	TFIID-dominated
YLR093C	NYV1	TFIID	TFIID-dominated
YLR291C	GCD7	TFIID	TFIID-dominated
YML111W	BUL2	TFIID	TFIID-dominated
YDR162C	NBP2	TFIID	TFIID-dominated
YKL100C	YPF1	TFIID	TFIID-dominated
YJL060W	BNA3	TFIID	TFIID-dominated
YLR086W	SMC4	TFIID	TFIID-dominated
YNL162W	RPL42A	TFIID	TFIID-dominated
YKR026C	GCN3	TFIID	TFIID-dominated
YAL040C	CLN3	CR	SAGA-dominated
YJL110C	GZF3	TFIID	TFIID-dominated
YOR307C	SLY41	TFIID	TFIID-dominated
YBR002C	RER2	TFIID	TFIID-dominated
YDR423C	CAD1	TFIID	TFIID-dominated
YIL116W	HIS5	CR	SAGA-dominated
YDR505C	PSP1	TFIID	TFIID-dominated
YDR477W	SNF1	TFIID	TFIID-dominated
YEL043W	YEL043W	TFIID	TFIID-dominated
YDL095W	PMT1	TFIID	TFIID-dominated
YPL085W	SEC16	TFIID	TFIID-dominated
YGL107C	RMD9	TFIID	TFIID-dominated
YLR312W-A	MRPL15	TFIID
YNR017W	TIM23	TFIID	TFIID-dominated
YML015C	TAF11	TFIID	TFIID-dominated
YMR237W	BCH1	TFIID	TFIID-dominated
YDR388W	RVS167	TFIID	TFIID-dominated
YGR123C	PPT1	TFIID	TFIID-dominated
YNL300W	TOS6	CR	SAGA-dominated
YDR331W	GPI8	TFIID	TFIID-dominated
YKR062W	TFA2	TFIID	TFIID-dominated
YPL084W	BRO1	TFIID	TFIID-dominated
YPL183C	RTT10	TFIID	TFIID-dominated
YGL082W	YGL082W	TFIID	TFIID-dominated
YDR389W	SAC7	TFIID	TFIID-dominated
YNL188W	KAR1	TFIID	TFIID-dominated
YBR080C	SEC18	TFIID	TFIID-dominated
YIR006C	PAN1	TFIID	TFIID-dominated
YGR274C	TAF1	TFIID	TFIID-dominated
YBR187W	GDT1	TFIID	TFIID-dominated
YPL143W	RPL33A	TFIID	TFIID-dominated
YHR030C	SLT2	TFIID	SAGA-dominated
YMR077C	VPS20	TFIID	TFIID-dominated
YPR189W	SKI3	TFIID	TFIID-dominated
YMR024W	MRPL3	TFIID	TFIID-dominated
YJL044C	GYP6	TFIID	TFIID-dominated
YDL240W	LRG1	TFIID	TFIID-dominated
YML062C	MFT1	TFIID	TFIID-dominated
YLR274W	MCM5	TFIID	TFIID-dominated
YER080W	AIM9	TFIID	TFIID-dominated
YOR001W	RRP6	TFIID	TFIID-dominated
YKL126W	YPK1	TFIID	TFIID-dominated
YMR099C	YMR099C	TFIID	TFIID-dominated
YDR116C	MRPL1	TFIID	TFIID-dominated
YLR298C	YHC1	TFIID	TFIID-dominated
YBL061C	SKT5	TFIID	TFIID-dominated
YKR059W	TIF1	TFIID	TFIID-dominated
YLR332W	MID2	TFIID	TFIID-dominated
YDR398W	UTP5	TFIID	TFIID-dominated
YMR128W	ECM16	TFIID	TFIID-dominated
YGR250C	YGR250C	CR	SAGA-dominated
YOR234C	RPL33B	TFIID	TFIID-dominated
YKR089C	TGL4	TFIID	TFIID-dominated
YPR119W	CLB2	CR	TFIID-dominated
YPR004C	AIM45	TFIID	TFIID-dominated
YIL127C	RRT14	TFIID	TFIID-dominated
YLR079W	SIC1	CR	SAGA-dominated
YIR004W	DJP1	TFIID	TFIID-dominated
YOR316C	COT1	TFIID	TFIID-dominated
YPR161C	SGV1	TFIID	TFIID-dominated
YLL014W	EMC6	TFIID	TFIID-dominated
YNL256W	FOL1	TFIID	TFIID-dominated
YNL139C	THO2	TFIID	TFIID-dominated
YOR340C	RPA43	TFIID	TFIID-dominated
YNL306W	MRPS18	TFIID	TFIID-dominated
YDR313C	PIB1	TFIID	TFIID-dominated
YEL052W	AFG1	TFIID	TFIID-dominated
YOR056C	NOB1	TFIID	TFIID-dominated
YGL194C	HOS2	TFIID	TFIID-dominated
YOR101W	RAS1	TFIID	TFIID-dominated
YKR096W	ESL2	TFIID	TFIID-dominated
YKL109W	HAP4	CR	SAGA-dominated
YLR275W	SMD2	TFIID	TFIID-dominated
YGL020C	GET1	TFIID	TFIID-dominated
YML105C	SEC65	TFIID	TFIID-dominated
YOR030W	DFG16	TFIID	TFIID-dominated
YKL049C	CSE4	TFIID	TFIID-dominated
YLR412W	BER1	TFIID	TFIID-dominated
YLR301W	HRI1	TFIID	TFIID-dominated
YLR305C	STT4	TFIID	TFIID-dominated
YOR322C	LDB19	TFIID	TFIID-dominated
YMR298W	LIP1	TFIID	TFIID-dominated
YDR184C	ATC1	TFIID	TFIID-dominated
YDL037C	BSC1	CR	TFIID-dominated
YNL201C	PSY2	TFIID	TFIID-dominated
YHR107C	CDC12	TFIID	TFIID-dominated
YGR251W	NOP19	TFIID	TFIID-dominated
YDR141C	DOP1	TFIID	TFIID-dominated
YHR009C	TDA3	TFIID	TFIID-dominated
YDL060W	TSR1	TFIID	TFIID-dominated
YNL081C	SWS2	TFIID	TFIID-dominated
YCL010C	SGF29	TFIID	TFIID-dominated
YMR272C	SCS7	CR	SAGA/TFIID
YER178W	PDA1	TFIID	TFIID-dominated
YLR363C	NMD4	TFIID	TFIID-dominated
YIR018W	YAP5	TFIID	TFIID-dominated
YGL056C	SDS23	TFIID	TFIID-dominated
YNL075W	IMP4	TFIID	TFIID-dominated
YDR120C	TRM1	TFIID	SAGA/TFIID
YGL171W	ROK1	TFIID	TFIID-dominated
YDR373W	FRQ1	TFIID	TFIID-dominated
YKL211C	TRP3	TFIID	TFIID-dominated
YDL207W	GLE1	TFIID	TFIID-dominated
YLR401C	DUS3	TFIID	TFIID-dominated
YLR321C	SFH1	TFIID	TFIID-dominated
YLR038C	COX12	TFIID	TFIID-dominated
YNR047W	FPK1	TFIID	TFIID-dominated
YLR185W	RPL37A	TFIID	TFIID-dominated
YDR232W	HEM1	TFIID	TFIID-dominated
YOR075W	UFE1	TFIID	TFIID-dominated
YMR314W	PRE5	TFIID	TFIID-dominated
YBL103C	RTG3	TFIID	TFIID-dominated
YDR464W	SPP41	TFIID	TFIID-dominated
YNL301C	RPL18B	CR	TFIID-dominated
YPR042C	PUF2	TFIID	TFIID-dominated
YDR041W	RSM10	TFIID	TFIID-dominated
YBR245C	ISW1	TFIID	TFIID-dominated
YDR138W	HPR1	TFIID	TFIID-dominated
YJL096W	MRPL49	TFIID	TFIID-dominated
YIL062C	ARC15	TFIID	TFIID-dominated
YDL135C	RDI1	TFIID	TFIID-dominated
YIL084C	SDS3	TFIID	TFIID-dominated
YNL161W	CBK1	TFIID	TFIID-dominated
YDR458C	HEH2	TFIID	TFIID-dominated
YML092C	PRE8	TFIID	TFIID-dominated
YHR013C	ARD1	TFIID	TFIID-dominated
YGL148W	ARO2	TFIID	TFIID-dominated
YGL055W	OLE1	CR	SAGA/TFIID
YDR001C	NTH1	CR	SAGA-dominated
YOR095C	RKI1	TFIID	SAGA/TFIID
YGR074W	SMD1	TFIID	TFIID-dominated
YJL129C	TRK1	TFIID	TFIID-dominated
YHR090C	YNG2	TFIID	TFIID-dominated
YHR152W	SPO12	TFIID	TFIID-dominated
YGL039W	YGL039W	TFIID	TFIID-dominated
YKL099C	UTP11	TFIID	TFIID-dominated
YOL030W	GAS5	CR	TFIID-dominated
YIL031W	ULP2	TFIID	TFIID-dominated
YBR058C-A	TSC3	TFIID
YPL189C-A	COA2	TFIID
YPL211W	NIP7	TFIID	TFIID-dominated
YLR114C	AVL9	TFIID	TFIID-dominated
YHR123W	EPT1	TFIID	TFIID-dominated
YOR272W	YTM1	TFIID	TFIID-dominated
YPR025C	CCL1	TFIID	TFIID-dominated
YBL033C	RIB1	CR	TFIID-dominated
YGR261C	APL6	TFIID	TFIID-dominated
YLR045C	STU2	TFIID	TFIID-dominated
YDR161W	YDR161W	TFIID	TFIID-dominated
YKR056W	TRM2	TFIID	TFIID-dominated
YDR189W	SLY1	TFIID	TFIID-dominated
YBR151W	APD1	TFIID	TFIID-dominated
YNR074C	AIF1	CR	TFIID-dominated
YKL167C	MRP49	TFIID	TFIID-dominated
YIL129C	TAO3	TFIID	TFIID-dominated
YDR454C	GUK1	TFIID	TFIID-dominated
YDL027C	YDL027C	TFIID	TFIID-dominated
YBR166C	TYR1	TFIID	TFIID-dominated
YGL200C	EMP24	TFIID	TFIID-dominated
YOL158C	ENB1	CR	TFIID-dominated
YDR297W	SUR2	TFIID	SAGA-dominated
YGL187C	COX4	TFIID	TFIID-dominated
YDR301W	CFT1	TFIID	TFIID-dominated
YGR084C	MRP13	TFIID	TFIID-dominated
YHR197W	RIX1	TFIID	TFIID-dominated
YNR053C	NOG2	TFIID	TFIID-dominated
YGR008C	STF2	CR	SAGA-dominated
YKR030W	GMH1	TFIID	TFIID-dominated
YLR254C	NDL1	TFIID	TFIID-dominated
YDR017C	KCS1	TFIID	TFIID-dominated
YGL094C	PAN2	TFIID	TFIID-dominated
YNL261W	ORC5	TFIID	TFIID-dominated
YBR281C	DUG2	TFIID	TFIID-dominated
YLR166C	SEC10	TFIID	TFIID-dominated
YEL056W	HAT2	TFIID	TFIID-dominated
YJL165C	HAL5	TFIID	TFIID-dominated
YOR109W	INP53	TFIID	TFIID-dominated
YJL005W	CYR1	TFIID	TFIID-dominated
YPL020C	ULP1	TFIID	TFIID-dominated
YMR001C	CDC5	TFIID	TFIID-dominated
YOR035C	SHE4	TFIID	SAGA-dominated
YCL045C	EMC1	TFIID	TFIID-dominated
YKL186C	MTR2	TFIID	TFIID-dominated
YPL070W	MUK1	TFIID	TFIID-dominated
YKR002W	PAP1	TFIID	TFIID-dominated
YBR267W	REI1	TFIID	TFIID-dominated
YBL078C	ATG8	TFIID	SAGA-dominated
YER175C	TMT1	TFIID	SAGA-dominated
YNL027W	CRZ1	TFIID	TFIID-dominated
YKR018C	YKR018C	TFIID	TFIID-dominated
YIL026C	IRR1	TFIID	TFIID-dominated
YBL045C	COR1	TFIID	TFIID-dominated
YOR160W	MTR10	TFIID	TFIID-dominated
YJR050W	ISY1	TFIID	TFIID-dominated
YJL197W	UBP12	TFIID	TFIID-dominated
YGR208W	SER2	TFIID	TFIID-dominated
YCL057W	PRD1	TFIID	TFIID-dominated
YKL130C	SHE2	TFIID	TFIID-dominated
YER100W	UBC6	TFIID	TFIID-dominated
YER035W	EDC2	CR	SAGA-dominated
YGR038W	ORM1	TFIID	TFIID-dominated
YNL090W	RHO2	TFIID	TFIID-dominated
YPR104C	FHL1	TFIID	TFIID-dominated
YLR186W	EMG1	TFIID	TFIID-dominated
YMR300C	ADE4	TFIID	SAGA-dominated
YHR073W	OSH3	TFIID	TFIID-dominated
YBR155W	CNS1	TFIID	TFIID-dominated
YOL133W	HRT1	TFIID	TFIID-dominated
YFL007W	BLM10	TFIID	TFIID-dominated
YGL040C	HEM2	TFIID	TFIID-dominated
YPR020W	ATP20	TFIID	TFIID-dominated
YOR091W	TMA46	TFIID	TFIID-dominated
YOR108W	LEU9	TFIID	TFIID-dominated
YBR212W	NGR1	TFIID	TFIID-dominated
YOR217W	RFC1	TFIID	TFIID-dominated
YER146W	LSM5	TFIID	TFIID-dominated
YPL057C	SUR1	CR	SAGA-dominated
YAL059W	ECM1	TFIID	TFIID-dominated
YOR132W	VPS17	TFIID	TFIID-dominated
YJR010C-A	SPC1	TFIID	TFIID-dominated
YDL056W	MBP1	TFIID	TFIID-dominated
YGR252W	GCN5	TFIID	TFIID-dominated
YPL242C	IQG1	TFIID	TFIID-dominated
YJR011C	YJR011C	TFIID	TFIID-dominated
YKL128C	PMU1	TFIID	TFIID-dominated
YCR067C	SED4	TFIID	TFIID-dominated
YLR429W	CRN1	TFIID	TFIID-dominated
YJL033W	HCA4	TFIID	TFIID-dominated
YFR051C	RET2	TFIID	TFIID-dominated
YJL198W	PHO90	TFIID	TFIID-dominated
YEL053C	MAK10	TFIID	TFIID-dominated
YBL032W	HEK2	TFIID	no call
YLL001W	DNM1	TFIID	TFIID-dominated
YIL125W	KGD1	TFIID	TFIID-dominated
YIL090W	ICE2	TFIID	TFIID-dominated
YKR072C	SIS2	TFIID	SAGA-dominated
YDR485C	VPS72	TFIID	TFIID-dominated
YDR494W	RSM28	TFIID	TFIID-dominated
YOR086C	TCB1	TFIID	TFIID-dominated
YPR118W	MRI1	TFIID	TFIID-dominated
YPR088C	SRP54	TFIID	TFIID-dominated
YDR181C	SAS4	TFIID	TFIID-dominated
YJR132W	NMD5	TFIID	TFIID-dominated
YAL017W	PSK1	TFIID	TFIID-dominated
YGL172W	NUP49	TFIID	TFIID-dominated
YPR069C	SPE3	CR	TFIID-dominated
YPL081W	RPS9A	TFIID	TFIID-dominated
YMR261C	TPS3	TFIID	SAGA-dominated
YLR414C	PUN1	CR	SAGA-dominated
YNL147W	LSM7	TFIID	TFIID-dominated
YHL027W	RIM101	TFIID	TFIID-dominated
YER172C	BRR2	TFIID	TFIID-dominated
YLR328W	NMA1	TFIID	TFIID-dominated
YNL050C	YNL050C	TFIID	TFIID-dominated
YNL051W	COG5	TFIID	TFIID-dominated
YNL288W	CAF40	TFIID	TFIID-dominated
YNL182C	IPI3	TFIID	TFIID-dominated
YPL234C	VMA11	TFIID	TFIID-dominated
YOR273C	TPO4	CR	TFIID-dominated
YBL097W	BRN1	TFIID	TFIID-dominated
YNL238W	KEX2	TFIID	TFIID-dominated
YDR098C	GRX3	TFIID	TFIID-dominated
YLR096W	KIN2	TFIID	TFIID-dominated
YOR119C	RIO1	TFIID	TFIID-dominated
YNL199C	GCR2	TFIID	TFIID-dominated
YJR062C	NTA1	TFIID	TFIID-dominated
YOR211C	MGM1	TFIID	TFIID-dominated
YFR041C	ERJ5	TFIID	TFIID-dominated
YFR031C	SMC2	TFIID	TFIID-dominated
YKR064W	OAF3	TFIID	TFIID-dominated
YOR171C	LCB4	TFIID	TFIID-dominated
YIL047C	SYG1	TFIID	TFIID-dominated
YPL266W	DIM1	TFIID	TFIID-dominated
YEL036C	ANP1	TFIID	TFIID-dominated
YMR071C	TVP18	TFIID	TFIID-dominated
YKL008C	LAC1	CR	TFIID-dominated
YIL147C	SLN1	TFIID	TFIID-dominated
YLR095C	IOC2	TFIID	no call
YPL163C	SVS1	CR	SAGA-dominated
YLR367W	RPS22B	TFIID	TFIID-dominated
YNL330C	RPD3	TFIID	TFIID-dominated
YML071C	COG8	TFIID	TFIID-dominated
YBR234C	ARC40	TFIID	TFIID-dominated
YHR181W	SVP26	TFIID	TFIID-dominated
YMR296C	LCB1	TFIID	TFIID-dominated
YLR073C	RFU1	TFIID	TFIID-dominated
YPR034W	ARP7	TFIID	TFIID-dominated
YJL011C	RPC17	TFIID	TFIID-dominated
YAR007C	RFA1	TFIID	TFIID-dominated
YNL062C	GCD10	TFIID	TFIID-dominated
YGL129C	RSM23	TFIID	TFIID-dominated
YGL111W	NSA1	TFIID	TFIID-dominated
YLR278C	YLR278C	TFIID	TFIID-dominated
YMR304W	UBP15	TFIID	TFIID-dominated
YGR063C	SPT4	TFIID	TFIID-dominated
YDR216W	ADR1	TFIID	TFIID-dominated
YGL178W	MPT5	TFIID	TFIID-dominated
YHR165C	PRP8	TFIID	TFIID-dominated
YLR138W	NHA1	TFIID	TFIID-dominated
YOL032W	OPI10	TFIID	TFIID-dominated
YMR117C	SPC24	TFIID	TFIID-dominated
YBL040C	ERD2	TFIID	TFIID-dominated
YER111C	SWI4	TFIID	TFIID-dominated
YLR454W	FMP27	TFIID	TFIID-dominated
YBR073W	RDH54	TFIID	TFIID-dominated
YHR118C	ORC6	TFIID	TFIID-dominated
YLR120C	YPS1	TFIID	SAGA-dominated
YOL013C	HRD1	TFIID	TFIID-dominated
YMR061W	RNA14	TFIID	TFIID-dominated
YHR146W	CRP1	TFIID	TFIID-dominated
YBL107C	MIX23	TFIID	no call
YDR159W	SAC3	TFIID	TFIID-dominated
YCR065W	HCM1	CR	TFIID-dominated
YGR147C	NAT2	TFIID	TFIID-dominated
YOR150W	MRPL23	TFIID	TFIID-dominated
YGL041W-A	YGL041W-A	TFIID
YMR145C	NDE1	CR	TFIID-dominated
YML100W	TSL1	CR	SAGA-dominated
YCR069W	CPR4	TFIID	no call
YPL116W	HOS3	TFIID	TFIID-dominated
YKL010C	UFD4	TFIID	TFIID-dominated
YBR015C	MNN2	TFIID	TFIID-dominated
YCR107W	AAD3	TFIID	TFIID-dominated
YJR143C	PMT4	TFIID	SAGA/TFIID
YPR073C	LTP1	TFIID	TFIID-dominated
YBL090W	MRP21	TFIID	TFIID-dominated
YMR016C	SOK2	TFIID	TFIID-dominated
YNL111C	CYB5	TFIID	TFIID-dominated
YGR081C	SLX9	TFIID	TFIID-dominated
YBR095C	RXT2	TFIID	TFIID-dominated
YDR498C	SEC20	TFIID	TFIID-dominated
YPR141C	KAR3	TFIID	TFIID-dominated
YNR013C	PHO91	TFIID	TFIID-dominated
YML125C	PGA3	TFIID	TFIID-dominated
YGL049C	TIF4632	TFIID	SAGA-dominated
YLR226W	BUR2	TFIID	TFIID-dominated
YCL001W	RER1	TFIID	TFIID-dominated
YPL203W	TPK2	TFIID	TFIID-dominated
YHR200W	RPN10	TFIID	TFIID-dominated
YDR481C	PHO8	TFIID	TFIID-dominated
YER029C	SMB1	TFIID	TFIID-dominated
YGL125W	MET13	CR	TFIID-dominated
YDL236W	PHO13	TFIID	TFIID-dominated
YCL017C	NFS1	TFIID	TFIID-dominated
YKR074W	AIM29	TFIID	TFIID-dominated
YLR327C	TMA10	CR	SAGA-dominated
YDL166C	FAP7	TFIID	TFIID-dominated
YBR023C	CHS3	TFIID	TFIID-dominated
YHL038C	CBP2	TFIID	TFIID-dominated
YLR373C	VID22	TFIID	TFIID-dominated
YHR029C	YHI9	TFIID	TFIID-dominated
YHL039W	EFM1	TFIID	TFIID-dominated
YDR093W	DNF2	TFIID	no call
YBL017C	PEP1	TFIID	TFIID-dominated
YLR069C	MEF1	TFIID	TFIID-dominated
YHR056C	RSC30	TFIID	TFIID-dominated
YNL207W	RIO2	TFIID	TFIID-dominated
YJR054W	KCH1	TFIID	TFIID-dominated
YML110C	COQ5	TFIID	TFIID-dominated
YGR136W	LSB1	CR	SAGA-dominated
YPR191W	QCR2	TFIID	TFIID-dominated
YGL073W	HSF1	TFIID	TFIID-dominated
YPL188W	POS5	TFIID	TFIID-dominated
YGR210C	YGR210C	TFIID	TFIID-dominated
YHR063C	PAN5	TFIID	TFIID-dominated
YML032C	RAD52	TFIID	TFIID-dominated
YKR006C	MRPL13	TFIID	TFIID-dominated
YDR012W	RPL4B	TFIID	TFIID-dominated
YNR006W	VPS27	TFIID	TFIID-dominated
YOR230W	WTM1	CR	SAGA-dominated
YLR419W	YLR419W	TFIID	TFIID-dominated
YCR043C	YCR043C	TFIID	TFIID-dominated
YJL072C	PSF2	TFIID	TFIID-dominated
YIL151C	ESL1	TFIID	TFIID-dominated
YOL062C	APM4	TFIID	TFIID-dominated
YML081W	TDA9	TFIID	TFIID-dominated
YIL063C	YRB2	TFIID	TFIID-dominated
YDR524C	AGE1	TFIID	TFIID-dominated
YKL023W	YKL023W	TFIID	TFIID-dominated
YOR299W	BUD7	TFIID	TFIID-dominated
YPR115W	RGC1	TFIID	no call
YDR244W	PEX5	TFIID	TFIID-dominated
YIL008W	URM1	TFIID	TFIID-dominated
YGL036W	YGL036W	TFIID	TFIID-dominated
YDR531W	CAB1	TFIID	TFIID-dominated
YBL005W	PDR3	TFIID	TFIID-dominated
YPR055W	SEC8	TFIID	TFIID-dominated
[truncated: 2,901 more rows]
