# Supplementary material for: Two roles for the yeast transcription coactivator SAGA and a set of genes redundantly regulated by TFIID and SAGA
Source: eLife. 2020 Jan 8;9:e50109. doi: 10.7554/eLife.50109 (PMC6977968; doi:10.7554/eLife.50109)
Supplement: Figure 3—source data 2. — Data were used to plot Figure 3E. [file elife-50109-fig3-data2.xlsx]

## Sheet: TATA
gene_id	gene_name	class	TATA
YPR036W-A	SPO24	CR	TATA-containing
YLR109W	AHP1	CR	TATA-containing
YHR179W	OYE2	CR	TATA-containing
YGR209C	TRX2	CR	TATA-containing
YOL151W	GRE2	CR	TATA-containing
YGR192C	TDH3	CR	TATA-containing
YOL109W	ZEO1	CR	TATA-containing
YLR110C	CCW12	CR	TATA-containing
YDL184C	RPL41A	TFIID	TATA-containing
YDL133C-A	RPL41B	TFIID	TATA-containing
YDR524C-B	YDR524C-B	CR	TATA-containing
YGL008C	PMA1	CR	TATA-containing
YPL240C	HSP82	CR	TATA-containing
YMR186W	HSC82	CR	TATA-containing
YBR244W	GPX2	CR	TATA-containing
YNL134C	YNL134C	CR	TATA-less
YHR174W	ENO2	CR	TATA-containing
YCR012W	PGK1	CR	TATA-containing
YGR142W	BTN2	CR	TATA-containing
YML028W	TSA1	CR	TATA-containing
YOR298C-A	MBF1	CR	TATA-containing
YLR075W	RPL10	CR	TATA-containing
YLL024C	SSA2	CR	TATA-containing
YKL152C	GPM1	CR	TATA-containing
YML131W	YML131W	CR	TATA-containing
YCR024C-A	PMP1	CR	TATA-containing
YOR153W	PDR5	CR	TATA-containing
YPL187W	MF(ALPHA)1	CR	TATA-containing
YLR460C	YLR460C	CR	TATA-less
YDR353W	TRR1	CR	TATA-less
YGR055W	MUP1	CR	TATA-containing
YJR104C	SOD1	CR	TATA-containing
YDR011W	SNQ2	CR	TATA-containing
YNL031C	HHT2	CR	TATA-containing
YGR155W	CYS4	CR	TATA-containing
YKL060C	FBA1	CR	TATA-containing
YEL017C-A	PMP2	CR	TATA-containing
YAL005C	SSA1	CR	TATA-containing
YPL061W	ALD6	CR	TATA-containing
YJR045C	SSC1	CR	TATA-containing
YAL038W	CDC19	CR	TATA-containing
YLL026W	HSP104	CR	TATA-containing
YNL030W	HHF2	CR	TATA-containing
YBR008C	FLR1	CR	TATA-less
YLR249W	YEF3	CR	TATA-containing
YDR050C	TPI1	CR	TATA-less
YOR369C	RPS12	TFIID	TATA-containing
YGR234W	YHB1	CR	TATA-containing
YER091C	MET6	CR	TATA-containing
YJL034W	KAR2	CR	TATA-containing
YLR355C	ILV5	CR	TATA-containing
YCL026C-A	FRM2	CR	TATA-less
YIL053W	GPP1	CR	TATA-containing
YDR224C	HTB1	CR	TATA-containing
YDR225W	HTA1	CR	TATA-containing
YLR044C	PDC1	CR	TATA-containing
YLR325C	RPL38	TFIID	TATA-less
YLR108C	YLR108C	CR	TATA-containing
YJR123W	RPS5	TFIID	TATA-less
YNL178W	RPS3	TFIID	TATA-less
YLR167W	RPS31	TFIID	TATA-less
YNL007C	SIS1	CR	TATA-containing
YBR009C	HHF1	CR	TATA-containing
YHL015W	RPS20	TFIID	TATA-less
YBR101C	FES1	TFIID	TATA-less
YNL064C	YDJ1	TFIID	TATA-containing
YOR020C	HSP10	TFIID	TATA-containing
YDL081C	RPP1A	TFIID	TATA-less
YBL002W	HTB2	CR	TATA-containing
YEL009C	GCN4	CR	TATA-containing
YOR027W	STI1	CR	TATA-containing
YHR055C	CUP1-2	CR	TATA-containing
YDL124W	YDL124W	CR	TATA-containing
YDL055C	PSA1	CR	TATA-containing
YEL034W	HYP2	CR	TATA-containing
YBR010W	HHT1	CR	TATA-containing
YPL106C	SSE1	TFIID	TATA-less
YEL071W	DLD3	CR	TATA-containing
YAL003W	EFB1	CR	TATA-less
YMR058W	FET3	CR	TATA-containing
YDR382W	RPP2B	TFIID	TATA-less
YCR005C	CIT2	CR	TATA-containing
YEL046C	GLY1	CR	TATA-containing
YLR441C	RPS1A	TFIID	TATA-less
YOL086C	ADH1	CR	TATA-containing
YMR318C	ADH6	CR	TATA-containing
YPR149W	NCE102	CR	TATA-containing
YKL096W-A	CWP2	CR	TATA-containing
YKL056C	TMA19	CR	TATA-less
YCR024C-B	YCR024C-B	CR	TATA-less
YGL253W	HXK2	CR	TATA-containing
YLR259C	HSP60	TFIID	TATA-containing
YPL131W	RPL5	TFIID	TATA-less
YBL003C	HTA2	CR	TATA-containing
YOR063W	RPL3	CR	TATA-containing
YDL020C	RPN4	CR	TATA-containing
YNL231C	PDR16	CR	TATA-containing
YHR162W	MPC2	CR	TATA-containing
YCL026C-B	HBN1	CR	TATA-less
YOL039W	RPP2A	TFIID	TATA-less
YKL081W	TEF4	CR	TATA-less
YDL061C	RPS29B	TFIID	TATA-less
YJL101C	GSH1	CR	TATA-less
YJL190C	RPS22A	TFIID	TATA-containing
YLR216C	CPR6	TFIID	TATA-containing
YLR029C	RPL15A	TFIID	TATA-less
YKR071C	DRE2	CR	TATA-less
YOR302W	YOR302W	CR	TATA-containing
YDR502C	SAM2	CR	TATA-less
YDR033W	MRH1	CR	TATA-containing
YPR065W	ROX1	CR	TATA-less
YLR340W	RPP0	TFIID	TATA-less
YLR264W	RPS28B	TFIID	TATA-less
YER131W	RPS26B	TFIID	TATA-less
YBL092W	RPL32	TFIID	TATA-less
YJR009C	TDH2	CR	TATA-containing
YDR135C	YCF1	CR	TATA-containing
YPL250C	ICY2	CR	TATA-containing
YML063W	RPS1B	TFIID	TATA-less
YCR102C	YCR102C	CR	TATA-containing
YGL255W	ZRT1	CR	TATA-containing
YAL012W	CYS3	CR	TATA-less
YBR196C	PGI1	CR	TATA-less
YGR027C	RPS25A	TFIID	TATA-containing
YER043C	SAH1	CR	TATA-less
YMR251W-A	HOR7	CR	TATA-containing
YML116W	ATR1	CR	TATA-containing
YJL159W	HSP150	CR	TATA-containing
YGL123W	RPS2	TFIID	TATA-less
YBR078W	ECM33	CR	TATA-containing
YEL054C	RPL12A	TFIID	TATA-less
YGL189C	RPS26A	TFIID	TATA-less
YER177W	BMH1	CR	TATA-less
YBR068C	BAP2	CR	TATA-containing
YHR143W	DSE2	CR	TATA-containing
YHR071W	PCL5	CR	TATA-containing
YHR018C	ARG4	CR	TATA-containing
YOR052C	TMC1	CR	TATA-containing
YGR157W	CHO2	CR	TATA-less
YGR148C	RPL24B	TFIID	TATA-containing
YOR167C	RPS28A	TFIID	TATA-less
YML130C	ERO1	CR	TATA-less
YDR258C	HSP78	TFIID	TATA-containing
YMR307W	GAS1	CR	TATA-less
YLR286C	CTS1	CR	TATA-containing
YHL033C	RPL8A	TFIID	TATA-less
YHR072W-A	NOP10	TFIID	TATA-less
YDR418W	RPL12B	TFIID	TATA-less
YHR005C-A	TIM10	TFIID	TATA-less
YFL039C	ACT1	TFIID	TATA-containing
YDR513W	GRX2	CR	TATA-containing
YDL192W	ARF1	TFIID	TATA-less
YER145C	FTR1	CR	TATA-containing
YGL089C	MF(ALPHA)2	CR	TATA-containing
YDR037W	KRS1	CR	TATA-containing
YDR132C	YDR132C	CR	TATA-less
YDL147W	RPN5	TFIID	TATA-less
YLR333C	RPS25B	TFIID	TATA-less
YOR198C	BFR1	TFIID	TATA-less
YPR145W	ASN1	CR	TATA-containing
YGR211W	ZPR1	TFIID	TATA-less
YER052C	HOM3	CR	TATA-containing
YLR197W	NOP56	TFIID	TATA-less
YPR080W	TEF1	CR	TATA-less
YKR042W	UTH1	CR	TATA-containing
YML123C	PHO84	CR	TATA-containing
YER124C	DSE1	CR	TATA-containing
YBR118W	TEF2	CR	TATA-containing
YOL040C	RPS15	TFIID	TATA-less
YLR293C	GSP1	TFIID	TATA-less
YEL027W	VMA3	TFIID	TATA-containing
YLR304C	ACO1	CR	TATA-containing
YGR282C	BGL2	TFIID	TATA-less
YDL229W	SSB1	TFIID	TATA-containing
YKL216W	URA1	CR	TATA-containing
YDR099W	BMH2	TFIID	TATA-containing
YBR025C	OLA1	TFIID	TATA-less
YGR169C-A	LSO2	TFIID	TATA-less
YKL068W-A	YKL068W-A	CR	TATA-containing
YPL237W	SUI3	TFIID	TATA-less
YDR002W	YRB1	TFIID	TATA-less
YDL182W	LYS20	CR	TATA-containing
YGL031C	RPL24A	TFIID	TATA-less
YMR309C	NIP1	TFIID	TATA-containing
YLL060C	GTT2	CR	TATA-less
YDR086C	SSS1	TFIID	TATA-containing
YDR276C	PMP3	CR	TATA-containing
YDR533C	HSP31	CR	TATA-containing
YDR497C	ITR1	CR	TATA-containing
YLL045C	RPL8B	TFIID	TATA-less
YLR214W	FRE1	CR	TATA-less
YDR155C	CPR1	CR	TATA-containing
YDR171W	HSP42	CR	TATA-containing
YLR150W	STM1	TFIID	TATA-less
YOR007C	SGT2	TFIID	TATA-containing
YDR363W-A	SEM1	TFIID	TATA-less
YDL232W	OST4	TFIID	TATA-less
YGL054C	ERV14	TFIID	TATA-less
YNL209W	SSB2	TFIID	TATA-less
YNL067W	RPL9B	TFIID	TATA-less
YOR136W	IDH2	CR	TATA-containing
YNL036W	NCE103	CR	TATA-containing
YJR007W	SUI2	TFIID	TATA-containing
YPL037C	EGD1	TFIID	TATA-less
YIL138C	TPM2	TFIID	TATA-containing
YOL139C	CDC33	TFIID	TATA-less
YPR165W	RHO1	TFIID	TATA-containing
YBR143C	SUP45	TFIID	TATA-less
YDR345C	HXT3	CR	TATA-containing
YPR035W	GLN1	CR	TATA-containing
YNL281W	HCH1	TFIID	TATA-less
YER165W	PAB1	TFIID	TATA-less
YNL244C	SUI1	TFIID	TATA-less
YDL084W	SUB2	TFIID	TATA-less
YMR038C	CCS1	CR	TATA-less
YNL069C	RPL16B	TFIID	TATA-less
YBR082C	UBC4	TFIID	TATA-less
YBR079C	RPG1	TFIID	TATA-less
YOR226C	ISU2	CR	TATA-containing
YLR043C	TRX1	TFIID	TATA-less
YPL091W	GLR1	CR	TATA-containing
YOR383C	FIT3	CR	TATA-less
YMR260C	TIF11	TFIID	TATA-less
YGL135W	RPL1B	TFIID	TATA-less
YOR344C	TYE7	CR	TATA-containing
YJR109C	CPA2	CR	TATA-containing
YKL172W	EBP2	TFIID	TATA-less
YGR240C	PFK1	CR	TATA-less
YNL255C	GIS2	TFIID	TATA-less
YPR158W	CUR1	TFIID	TATA-less
YBR189W	RPS9B	TFIID	TATA-less
YPL225W	YPL225W	TFIID	TATA-containing
YNL327W	EGT2	CR	TATA-containing
YGR085C	RPL11B	TFIID	TATA-less
YKL182W	FAS1	CR	TATA-containing
YAL035W	FUN12	TFIID	TATA-less
YHR008C	SOD2	CR	TATA-containing
YER036C	ARB1	TFIID	TATA-containing
YLR346C	YLR346C	CR	TATA-containing
YBR085C-A	YBR085C-A	CR	TATA-containing
YLR300W	EXG1	CR	TATA-containing
YER048W-A	ISD11	TFIID	TATA-less
YOR096W	RPS7A	TFIID	TATA-containing
YMR116C	ASC1	TFIID	TATA-less
YOR210W	RPB10	TFIID	TATA-less
YPL231W	FAS2	CR	TATA-containing
YDR194C	MSS116	TFIID	TATA-containing
YKL043W	PHD1	CR	TATA-containing
YDL168W	SFA1	CR	TATA-less
YML091C	RPM2	CR	TATA-containing
YER021W	RPN3	TFIID	TATA-less
YNL079C	TPM1	TFIID	TATA-less
YGL028C	SCW11	CR	TATA-containing
YCL050C	APA1	TFIID	TATA-less
YOR204W	DED1	CR	TATA-containing
YPL135W	ISU1	CR	TATA-containing
YNL131W	TOM22	TFIID	TATA-less
YML106W	URA5	TFIID	TATA-less
YHR193C	EGD2	TFIID	TATA-less
YOL127W	RPL25	TFIID	TATA-less
YLR372W	ELO3	TFIID	TATA-containing
YOR382W	FIT2	CR	TATA-containing
YGR118W	RPS23A	TFIID	TATA-less
YKL164C	PIR1	CR	TATA-containing
YLR048W	RPS0B	TFIID	TATA-less
YHR082C	KSP1	TFIID	TATA-less
YLR175W	CBF5	TFIID	TATA-less
YGR254W	ENO1	CR	TATA-containing
YGR159C	NSR1	TFIID	TATA-less
YCR021C	HSP30	CR	TATA-containing
YEL040W	UTR2	CR	TATA-containing
YKL082C	RRP14	TFIID	TATA-less
YBR109C	CMD1	TFIID	TATA-less
YNL287W	SEC21	TFIID	TATA-less
YML058W	SML1	CR	TATA-containing
YDR071C	PAA1	TFIID	TATA-less
YER025W	GCD11	TFIID	TATA-less
YDL243C	AAD4	CR	TATA-containing
YLR136C	TIS11	CR	TATA-containing
YBR011C	IPP1	TFIID	TATA-less
YEL026W	SNU13	TFIID	TATA-less
YNL121C	TOM70	TFIID	TATA-less
YDL126C	CDC48	TFIID	TATA-less
YPR132W	RPS23B	TFIID	TATA-less
YBR162C	TOS1	CR	TATA-less
YLR180W	SAM1	CR	TATA-containing
YPR133W-A	TOM5	TFIID	TATA-less
YJL148W	RPA34	TFIID	TATA-less
YGR264C	MES1	TFIID	TATA-less
YJL124C	LSM1	TFIID	TATA-less
YBL076C	ILS1	TFIID	TATA-less
YLL028W	TPO1	CR	TATA-containing
YER148W	SPT15	TFIID	TATA-containing
YHR143W-A	RPC10	TFIID	TATA-containing
YIL078W	THS1	TFIID	TATA-containing
YKL040C	NFU1	CR	TATA-containing
YKL180W	RPL17A	TFIID	TATA-less
YGL058W	RAD6	TFIID	TATA-less
YJL111W	CCT7	TFIID	TATA-less
YGR086C	PIL1	CR	TATA-containing
YMR108W	ILV2	TFIID	TATA-containing
YPR102C	RPL11A	TFIID	TATA-less
YDL014W	NOP1	TFIID	TATA-less
YHR027C	RPN1	TFIID	TATA-containing
YOR312C	RPL20B	TFIID	TATA-less
YOR261C	RPN8	TFIID	TATA-less
YIL075C	RPN2	TFIID	TATA-less
YLR388W	RPS29A	TFIID	TATA-less
YLR342W	FKS1	CR	TATA-less
YPL145C	KES1	TFIID	TATA-less
YGL147C	RPL9A	TFIID	TATA-less
YDR427W	RPN9	TFIID	TATA-containing
YCL031C	RRP7	TFIID	TATA-less
YMR205C	PFK2	CR	TATA-less
YOR276W	CAF20	TFIID	TATA-less
YNR051C	BRE5	TFIID	TATA-less
YDL185W	VMA1	TFIID	TATA-less
YIL142W	CCT2	TFIID	TATA-less
YFR033C	QCR6	CR	TATA-less
YGL030W	RPL30	TFIID	TATA-less
YMR012W	CLU1	TFIID	TATA-less
YPR108W	RPN7	TFIID	TATA-containing
YBR067C	TIP1	TFIID	TATA-containing
YBR158W	AMN1	CR	TATA-containing
YBL028C	YBL028C	TFIID	TATA-containing
YDL208W	NHP2	TFIID	TATA-less
YER102W	RPS8B	TFIID	TATA-less
YKL156W	RPS27A	TFIID	TATA-less
YPL274W	SAM3	CR	TATA-containing
YNL180C	RHO5	CR	TATA-less
YOR122C	PFY1	TFIID	TATA-less
YPL004C	LSP1	CR	TATA-containing
YOR310C	NOP58	TFIID	TATA-less
YDL130W	RPP1B	TFIID	TATA-less
YMR122W-A	YMR122W-A	CR	TATA-containing
YOR303W	CPA1	CR	TATA-containing
YOR270C	VPH1	TFIID	TATA-less
YGL215W	CLG1	TFIID	TATA-less
YGL105W	ARC1	TFIID	TATA-containing
YLR421C	RPN13	TFIID	TATA-less
YDR233C	RTN1	TFIID	TATA-less
YDR054C	CDC34	TFIID	TATA-less
YPR074C	TKL1	TFIID	TATA-containing
YKL071W	YKL071W	CR	TATA-containing
YDR023W	SES1	TFIID	TATA-containing
YER064C	VHR2	CR	TATA-containing
YKR076W	ECM4	CR	TATA-less
YML026C	RPS18B	TFIID	TATA-less
YCR093W	CDC39	TFIID	TATA-less
YHR007C	ERG11	CR	TATA-containing
YLR390W-A	CCW14	CR	TATA-less
YPL226W	NEW1	TFIID	TATA-less
YJR094W-A	RPL43B	TFIID	TATA-less
YDL074C	BRE1	TFIID	TATA-containing
YER026C	CHO1	CR	TATA-containing
YPL239W	YAR1	TFIID	TATA-less
YLR354C	TAL1	CR	TATA-containing
YDL137W	ARF2	TFIID	TATA-less
YJR121W	ATP2	CR	TATA-less
YDR487C	RIB3	CR	TATA-containing
YDL082W	RPL13A	TFIID	TATA-less
YML126C	ERG13	TFIID	TATA-containing
YDR046C	BAP3	CR	TATA-less
YPL154C	PEP4	CR	TATA-containing
YPR041W	TIF5	TFIID	TATA-less
YOR293W	RPS10A	TFIID	TATA-less
YDR060W	MAK21	TFIID	TATA-less
YGR162W	TIF4631	TFIID	TATA-less
YPL160W	CDC60	TFIID	TATA-containing
YDR003W-A	YDR003W-A	TFIID	TATA-less
YMR142C	RPL13B	TFIID	TATA-less
YDR064W	RPS13	TFIID	TATA-less
YOR151C	RPB2	TFIID	TATA-less
YPL093W	NOG1	TFIID	TATA-containing
YKL009W	MRT4	TFIID	TATA-less
YMR177W	MMT1	CR	TATA-less
YGR037C	ACB1	TFIID	TATA-containing
YCL037C	SRO9	TFIID	TATA-less
YLR009W	RLP24	TFIID	TATA-less
YGR285C	ZUO1	TFIID	TATA-containing
YKL122C	SRP21	TFIID	TATA-less
YOR341W	RPA190	TFIID	TATA-less
YOL058W	ARG1	CR	TATA-less
YFR032C-A	RPL29	TFIID	TATA-less
YCR031C	RPS14A	TFIID	TATA-containing
YIL069C	RPS24B	TFIID	TATA-less
YNL016W	PUB1	TFIID	TATA-less
YDR172W	SUP35	TFIID	TATA-less
YKL196C	YKT6	TFIID	TATA-less
YNL154C	YCK2	TFIID	TATA-less
YMR242C	RPL20A	TFIID	TATA-less
YJR088C	EMC2	TFIID	TATA-less
YKL001C	MET14	TFIID	TATA-containing
YGR253C	PUP2	TFIID	TATA-less
YOR254C	SEC63	TFIID	TATA-less
YBR106W	PHO88	TFIID	TATA-containing
YDL097C	RPN6	TFIID	TATA-containing
YLR040C	AFB1	CR	TATA-less
YBR283C	SSH1	TFIID	TATA-less
YGR218W	CRM1	TFIID	TATA-less
YNL260C	LTO1	CR	TATA-containing
YMR072W	ABF2	TFIID	TATA-less
YKL013C	ARC19	TFIID	TATA-less
YGL206C	CHC1	TFIID	TATA-less
YOR232W	MGE1	TFIID	TATA-less
YBL027W	RPL19B	TFIID	TATA-less
YPL243W	SRP68	TFIID	TATA-less
YER055C	HIS1	CR	TATA-containing
YKR094C	RPL40B	TFIID	TATA-less
YER072W	VTC1	CR	TATA-less
YMR039C	SUB1	TFIID	TATA-less
YNR016C	ACC1	CR	TATA-containing
YDL070W	BDF2	CR	TATA-containing
YOR206W	NOC2	TFIID	TATA-less
YBR127C	VMA2	TFIID	TATA-less
YFR004W	RPN11	TFIID	TATA-less
YGL037C	PNC1	CR	TATA-containing
YLR347C	KAP95	TFIID	TATA-less
YJL127C-B	YJL127C-B	TFIID	TATA-less
YFL045C	SEC53	TFIID	TATA-less
YPR110C	RPC40	TFIID	TATA-less
YDL160C	DHH1	TFIID	TATA-less
YIL133C	RPL16A	TFIID	TATA-less
YML073C	RPL6A	TFIID	TATA-less
YER122C	GLO3	TFIID	TATA-containing
YDR496C	PUF6	TFIID	TATA-less
YNL087W	TCB2	CR	TATA-containing
YLR060W	FRS1	TFIID	TATA-containing
YKL039W	PTM1	CR	TATA-containing
YHR052W	CIC1	TFIID	TATA-less
YCR053W	THR4	TFIID	TATA-less
YMR002W	MIX17	CR	TATA-containing
YER070W	RNR1	CR	TATA-containing
YPL220W	RPL1A	TFIID	TATA-less
YGL207W	SPT16	TFIID	TATA-less
YER073W	ALD5	CR	TATA-less
YOR335C	ALA1	TFIID	TATA-less
YFL031W	HAC1	CR	TATA-containing
YCR009C	RVS161	TFIID	TATA-less
YLL050C	COF1	TFIID	TATA-less
YBL056W	PTC3	TFIID	TATA-less
YNL190W	YNL190W	CR	TATA-containing
YNL229C	URE2	TFIID	TATA-less
YPR187W	RPO26	TFIID	TATA-less
YLR448W	RPL6B	TFIID	TATA-less
YIL051C	MMF1	CR	TATA-containing
YJR105W	ADO1	TFIID	TATA-less
YER133W	GLC7	TFIID	TATA-less
YGL103W	RPL28	TFIID	TATA-less
YNL308C	KRI1	TFIID	TATA-containing
YLR061W	RPL22A	TFIID	TATA-less
YNL153C	GIM3	TFIID	TATA-less
YMR308C	PSE1	TFIID	TATA-less
YPL210C	SRP72	TFIID	TATA-less
YDR429C	TIF35	TFIID	TATA-containing
YDR447C	RPS17B	TFIID	TATA-less
YOR361C	PRT1	TFIID	TATA-less
YNL110C	NOP15	TFIID	TATA-less
YDR341C	YDR341C	TFIID	TATA-less
YGR279C	SCW4	CR	TATA-containing
YKL117W	SBA1	TFIID	TATA-less
YHR064C	SSZ1	TFIID	TATA-less
YOR355W	GDS1	TFIID	TATA-less
YBR121C	GRS1	TFIID	TATA-less
YNL189W	SRP1	TFIID	TATA-less
YDR368W	YPR1	TFIID	TATA-less
YNL241C	ZWF1	CR	TATA-containing
YOL121C	RPS19A	TFIID	TATA-less
YKL103C	APE1	CR	TATA-less
YLR287C-A	RPS30A	CR	TATA-containing
YNL096C	RPS7B	TFIID	TATA-less
YHL034C	SBP1	TFIID	TATA-less
YLR455W	PDP3	TFIID	TATA-less
YNL070W	TOM7	TFIID	TATA-containing
YIL148W	RPL40A	TFIID	TATA-less
YER009W	NTF2	TFIID	TATA-less
YJR122W	IBA57	TFIID	TATA-less
YHR183W	GND1	CR	TATA-containing
YNL104C	LEU4	CR	TATA-containing
YGR094W	VAS1	TFIID	TATA-less
YDR158W	HOM2	CR	TATA-containing
YPL260W	YPL260W	TFIID	TATA-less
YAL025C	MAK16	TFIID	TATA-less
YDR238C	SEC26	TFIID	TATA-less
YPR024W	YME1	TFIID	TATA-less
YPR181C	SEC23	TFIID	TATA-less
YNL118C	DCP2	TFIID	TATA-less
YKR008W	RSC4	TFIID	TATA-containing
YER090W	TRP2	TFIID	TATA-less
YOR117W	RPT5	TFIID	TATA-less
YGR034W	RPL26B	TFIID	TATA-less
YNL212W	VID27	TFIID	TATA-less
YMR229C	RRP5	TFIID	TATA-less
YAL016W	TPD3	TFIID	TATA-less
YMR161W	HLJ1	TFIID	TATA-less
YFR052W	RPN12	TFIID	TATA-less
YNL066W	SUN4	CR	TATA-less
YFL016C	MDJ1	TFIID	TATA-less
YNL113W	RPC19	TFIID	TATA-less
YOR168W	GLN4	TFIID	TATA-less
YPL204W	HRR25	TFIID	TATA-less
YGL190C	CDC55	TFIID	TATA-containing
YOR370C	MRS6	TFIID	TATA-less
YDR151C	CTH1	TFIID	TATA-less
YKR057W	RPS21A	TFIID	TATA-less
YER087C-B	SBH1	TFIID	TATA-containing
YDR035W	ARO3	TFIID	TATA-less
YOR267C	HRK1	TFIID	TATA-less
YLR413W	INA1	CR	TATA-containing
YBL072C	RPS8A	TFIID	TATA-less
YEL065W	SIT1	CR	TATA-containing
YBR154C	RPB5	TFIID	TATA-containing
YGR116W	SPT6	TFIID	TATA-containing
YOL136C	PFK27	CR	TATA-containing
YPL078C	ATP4	TFIID	TATA-less
YJL109C	UTP10	TFIID	TATA-less
YMR235C	RNA1	TFIID	TATA-less
YDR091C	RLI1	TFIID	TATA-less
YBL099W	ATP1	TFIID	TATA-less
YPR036W	VMA13	TFIID	TATA-less
YOL154W	ZPS1	CR	TATA-less
YLR051C	FCF2	TFIID	TATA-less
YNL002C	RLP7	TFIID	TATA-less
YKR095W	MLP1	TFIID	TATA-less
YBR034C	HMT1	TFIID	TATA-containing
YDL140C	RPO21	TFIID	TATA-less
YDR394W	RPT3	TFIID	TATA-less
YPL117C	IDI1	TFIID	TATA-less
YGR135W	PRE9	TFIID	TATA-less
YNL085W	MKT1	TFIID	TATA-less
YLR064W	PER33	CR	TATA-less
YML012W	ERV25	TFIID	TATA-less
YBL041W	PRE7	TFIID	TATA-less
YKL210W	UBA1	TFIID	TATA-less
YGL011C	SCL1	TFIID	TATA-less
YDR471W	RPL27B	TFIID	TATA-less
YGR124W	ASN2	TFIID	TATA-less
YOR332W	VMA4	TFIID	TATA-containing
YER002W	NOP16	TFIID	TATA-less
YJL189W	RPL39	TFIID	TATA-less
YKL178C	STE3	CR	TATA-containing
YFL004W	VTC2	CR	TATA-less
YDL145C	COP1	TFIID	TATA-less
YGL195W	GCN1	TFIID	TATA-less
YJL052W	TDH1	CR	TATA-containing
YMR143W	RPS16A	TFIID	TATA-containing
YML007W	YAP1	CR	TATA-less
YDR077W	SED1	CR	TATA-containing
YMR079W	SEC14	TFIID	TATA-less
YDR270W	CCC2	CR	TATA-containing
YJR063W	RPA12	TFIID	TATA-containing
YDR214W	AHA1	CR	TATA-containing
YPR103W	PRE2	TFIID	TATA-less
YDR365C	ESF1	TFIID	TATA-less
YCL043C	PDI1	CR	TATA-containing
YOL120C	RPL18A	TFIID	TATA-less
YGL173C	XRN1	TFIID	TATA-less
YGL122C	NAB2	TFIID	TATA-containing
YDL235C	YPD1	TFIID	TATA-less
YDL075W	RPL31A	TFIID	TATA-less
YLR276C	DBP9	TFIID	TATA-less
YER012W	PRE1	TFIID	TATA-less
YPL212C	PUS1	TFIID	TATA-less
YKL184W	SPE1	TFIID	TATA-less
YMR230W	RPS10B	TFIID	TATA-containing
YDL029W	ARP2	CR	TATA-less
YLR447C	VMA6	TFIID	TATA-less
YNL024C-A	KSH1	TFIID	TATA-less
YJR117W	STE24	TFIID	TATA-less
YPL249C-A	RPL36B	TFIID	TATA-less
YKL057C	NUP120	TFIID	TATA-less
YLR257W	YLR257W	TFIID	TATA-containing
YOR039W	CKB2	TFIID	TATA-less
YDR346C	SVF1	TFIID	TATA-containing
YPL043W	NOP4	TFIID	TATA-containing
YOR360C	PDE2	TFIID	TATA-containing
YGL029W	CGR1	TFIID	TATA-less
YFR040W	SAP155	TFIID	TATA-less
YNL248C	RPA49	TFIID	TATA-less
YDL007W	RPT2	TFIID	TATA-less
YML024W	RPS17A	TFIID	TATA-less
YOL027C	MDM38	TFIID	TATA-less
YBL024W	NCL1	TFIID	TATA-less
YER103W	SSA4	TFIID	TATA-containing
YIL126W	STH1	TFIID	TATA-less
YPL050C	MNN9	TFIID	TATA-less
YOR259C	RPT4	TFIID	TATA-less
YDR174W	HMO1	TFIID	TATA-less
YMR188C	MRPS17	TFIID	TATA-less
YOL145C	CTR9	TFIID	TATA-less
YDR299W	BFR2	TFIID	TATA-containing
YGR020C	VMA7	TFIID	TATA-less
YPR072W	NOT5	TFIID	TATA-less
YDR212W	TCP1	TFIID	TATA-containing
YKL054C	DEF1	CR	TATA-less
YLR292C	SEC72	TFIID	TATA-less
YPL179W	PPQ1	TFIID	TATA-less
YMR217W	GUA1	TFIID	TATA-containing
YIL035C	CKA1	TFIID	TATA-containing
YDR381W	YRA1	CR	TATA-containing
YHR128W	FUR1	CR	TATA-containing
YMR146C	TIF34	TFIID	TATA-less
YPL190C	NAB3	TFIID	TATA-less
YJL014W	CCT3	TFIID	TATA-containing
YKR052C	MRS4	CR	TATA-containing
YML103C	NUP188	TFIID	TATA-containing
YPR143W	RRP15	TFIID	TATA-less
YMR246W	FAA4	CR	TATA-containing
YNL197C	WHI3	TFIID	TATA-less
YKL035W	UGP1	CR	TATA-containing
YPL202C	AFT2	CR	TATA-less
YOR089C	VPS21	TFIID	TATA-containing
YOL077C	BRX1	TFIID	TATA-less
YBR286W	APE3	CR	TATA-containing
YJL130C	URA2	CR	TATA-containing
YGR103W	NOP7	TFIID	TATA-less
YER126C	NSA2	TFIID	TATA-less
YDR450W	RPS18A	TFIID	TATA-less
YMR183C	SSO2	TFIID	TATA-less
YKR014C	YPT52	TFIID	TATA-less
YHR196W	UTP9	TFIID	TATA-less
YGR229C	SMI1	TFIID	TATA-less
YOL049W	GSH2	TFIID	TATA-less
YML074C	FPR3	TFIID	TATA-containing
YIL118W	RHO3	TFIID	TATA-less
YMR131C	RRB1	TFIID	TATA-less
YNL061W	NOP2	TFIID	TATA-less
YBR177C	EHT1	CR	TATA-less
YJL002C	OST1	TFIID	TATA-less
YDR377W	ATP17	TFIID	TATA-less
YFL037W	TUB2	TFIID	TATA-less
YPL171C	OYE3	CR	TATA-containing
YGL238W	CSE1	TFIID	TATA-less
YPL178W	CBC2	TFIID	TATA-less
YDL148C	NOP14	TFIID	TATA-less
YIL038C	NOT3	TFIID	TATA-less
YJL008C	CCT8	TFIID	TATA-containing
YOR043W	WHI2	TFIID	TATA-less
YHR094C	HXT1	CR	TATA-containing
YGR185C	TYS1	TFIID	TATA-less
YDR190C	RVB1	TFIID	TATA-less
YML022W	APT1	TFIID	TATA-containing
YJL177W	RPL17B	TFIID	TATA-less
YHR141C	RPL42B	TFIID	TATA-less
YBR084C-A	RPL19A	TFIID	TATA-less
YBL022C	PIM1	TFIID	TATA-less
YDR508C	GNP1	CR	TATA-containing
YGR017W	YGR017W	TFIID	TATA-less
YFR010W	UBP6	TFIID	TATA-containing
YDR264C	AKR1	TFIID	TATA-containing
YFL038C	YPT1	TFIID	TATA-less
YGL077C	HNM1	CR	TATA-containing
YHL011C	PRS3	TFIID	TATA-less
YPL273W	SAM4	TFIID	TATA-less
YKL063C	YKL063C	TFIID	TATA-less
YBR130C	SHE3	TFIID	TATA-less
YGR132C	PHB1	TFIID	TATA-containing
YHR170W	NMD3	TFIID	TATA-containing
YBR049C	REB1	TFIID	TATA-less
YDR395W	SXM1	TFIID	TATA-less
YGR090W	UTP22	TFIID	TATA-less
YOR078W	BUD21	TFIID	TATA-less
YER136W	GDI1	TFIID	TATA-less
YDL180W	YDL180W	CR	TATA-less
YPR169W	JIP5	TFIID	TATA-less
YLR033W	RSC58	TFIID	TATA-containing
YPR043W	RPL43A	TFIID	TATA-less
YOL041C	NOP12	TFIID	TATA-less
YIL018W	RPL2B	TFIID	TATA-less
YMR194W	RPL36A	TFIID	TATA-less
YKR028W	SAP190	TFIID	TATA-less
YDR032C	PST2	CR	TATA-containing
YPL118W	MRP51	TFIID	TATA-containing
YDL083C	RPS16B	TFIID	TATA-less
YBR146W	MRPS9	TFIID	TATA-containing
YKL028W	TFA1	TFIID	TATA-less
YDR028C	REG1	TFIID	TATA-less
YKL006W	RPL14A	TFIID	TATA-less
YKL179C	COY1	TFIID	TATA-less
YGR054W	YGR054W	TFIID	TATA-less
YJL080C	SCP160	TFIID	TATA-less
YOR290C	SNF2	TFIID	TATA-containing
YER056C	FCY2	CR	TATA-containing
YPL079W	RPL21B	TFIID	TATA-less
YPL265W	DIP5	CR	TATA-containing
YDL025C	RTK1	CR	TATA-less
YGL009C	LEU1	TFIID	TATA-less
YHR135C	YCK1	TFIID	TATA-containing
YER074W	RPS24A	TFIID	TATA-less
YKR081C	RPF2	TFIID	TATA-less
YGR106C	VOA1	TFIID	TATA-less
YGL245W	GUS1	TFIID	TATA-less
YGR161C	RTS3	CR	TATA-containing
YDL125C	HNT1	CR	TATA-less
YDL122W	UBP1	TFIID	TATA-containing
YJL136C	RPS21B	TFIID	TATA-less
YKR011C	YKR011C	TFIID	TATA-containing
YDL053C	PBP4	TFIID	TATA-containing
YCL054W	SPB1	TFIID	TATA-less
YCL011C	GBP2	TFIID	TATA-less
YDR127W	ARO1	CR	TATA-less
YIL149C	MLP2	TFIID	TATA-less
YFR002W	NIC96	TFIID	TATA-less
YJL133C-A	YJL133C-A	CR	TATA-containing
YPL012W	RRP12	TFIID	TATA-less
YGR146C	ECL1	CR	TATA-less
YPL215W	CBP3	TFIID	TATA-containing
YML009C	MRPL39	TFIID	TATA-less
YGR128C	UTP8	TFIID	TATA-less
YOL068C	HST1	TFIID	TATA-less
YPR016C	TIF6	TFIID	TATA-less
YGR231C	PHB2	TFIID	TATA-less
YER123W	YCK3	TFIID	TATA-containing
YDR226W	ADK1	CR	TATA-containing
YPR010C	RPA135	TFIID	TATA-less
YGR130C	YGR130C	TFIID	TATA-less
YEL051W	VMA8	TFIID	TATA-less
YCR004C	YCP4	TFIID	TATA-containing
YMR295C	YMR295C	TFIID	TATA-less
YNL044W	YIP3	TFIID	TATA-containing
YML093W	UTP14	TFIID	TATA-less
YDR152W	GIR2	TFIID	TATA-less
YDR153C	ENT5	TFIID	TATA-less
YLR297W	YLR297W	CR	TATA-less
YPL146C	NOP53	TFIID	TATA-less
YNL005C	MRP7	TFIID	TATA-less
YPL105C	SYH1	TFIID	TATA-less
YNR021W	YNR021W	TFIID	TATA-less
YPL019C	VTC3	CR	TATA-less
YJR014W	TMA22	TFIID	TATA-containing
YHR005C	GPA1	TFIID	TATA-less
YBR162W-A	YSY6	TFIID	TATA-less
YML056C	IMD4	TFIID	TATA-less
YKL145W	RPT1	TFIID	TATA-less
YHR203C	RPS4B	TFIID	TATA-less
YGL244W	RTF1	TFIID	TATA-less
YDL116W	NUP84	TFIID	TATA-less
YDL143W	CCT4	TFIID	TATA-containing
YMR203W	TOM40	TFIID	TATA-less
YLR310C	CDC25	TFIID	TATA-less
YOR008C	SLG1	TFIID	TATA-less
YKL120W	OAC1	CR	TATA-containing
YDR335W	MSN5	TFIID	TATA-less
YHR077C	NMD2	TFIID	TATA-containing
YGR267C	FOL2	TFIID	TATA-less
YEL033W	MTC7	CR	TATA-less
YPR067W	ISA2	TFIID	TATA-less
YBR086C	IST2	TFIID	TATA-less
YGR175C	ERG1	CR	TATA-containing
YGL043W	DST1	TFIID	TATA-containing
YGL078C	DBP3	TFIID	TATA-less
YJL168C	SET2	TFIID	TATA-less
YMR037C	MSN2	CR	TATA-less
YLR221C	RSA3	TFIID	TATA-containing
YML038C	YMD8	TFIID	TATA-less
YOR224C	RPB8	TFIID	TATA-containing
YNL091W	NST1	TFIID	TATA-less
YGR167W	CLC1	TFIID	TATA-containing
YGL188C-A	YGL188C-A	TFIID	TATA-less
YFR050C	PRE4	TFIID	TATA-containing
YKL104C	GFA1	TFIID	TATA-less
YDR062W	LCB2	TFIID	TATA-less
YOR247W	SRL1	CR	TATA-containing
YML081C-A	ATP18	TFIID	TATA-less
YCR033W	SNT1	TFIID	TATA-less
YJL012C	VTC4	CR	TATA-containing
YKL080W	VMA5	TFIID	TATA-less
YOR326W	MYO2	TFIID	TATA-less
YCR082W	AHC2	TFIID	TATA-containing
YLR432W	IMD3	CR	TATA-containing
YMR173W	DDR48	CR	TATA-containing
YBR029C	CDS1	TFIID	TATA-less
YPL090C	RPS6A	TFIID	TATA-less
YBR199W	KTR4	TFIID	TATA-less
YER006W	NUG1	TFIID	TATA-containing
YDL067C	COX9	TFIID	TATA-less
YDR280W	RRP45	TFIID	TATA-less
YHR190W	ERG9	CR	TATA-containing
YBL030C	PET9	CR	TATA-containing
YOR209C	NPT1	TFIID	TATA-less
YMR015C	ERG5	CR	TATA-containing
YLL029W	FRA1	TFIID	TATA-less
YPR137W	RRP9	TFIID	TATA-less
YGL228W	SHE10	TFIID	TATA-less
YDR293C	SSD1	TFIID	TATA-less
YGL048C	RPT6	TFIID	TATA-less
YLR262C-A	TMA7	TFIID	TATA-less
YEL031W	SPF1	TFIID	TATA-less
YNL098C	RAS2	TFIID	TATA-less
YGR204W	ADE3	CR	TATA-containing
YEL013W	VAC8	TFIID	TATA-containing
YER030W	CHZ1	TFIID	TATA-less
YFL005W	SEC4	TFIID	TATA-less
YOL029C	YOL029C	TFIID	TATA-less
YNL157W	IGO1	TFIID	TATA-less
YCL064C	CHA1	CR	TATA-containing
YMR125W	STO1	TFIID	TATA-containing
YJL061W	NUP82	TFIID	TATA-less
YOR046C	DBP5	TFIID	TATA-containing
YJL138C	TIF2	CR	TATA-containing
YFR031C-A	RPL2A	TFIID	TATA-less
YJR139C	HOM6	TFIID	TATA-less
YOL004W	SIN3	TFIID	TATA-less
YPR033C	HTS1	TFIID	TATA-less
YJL140W	RPB4	TFIID	TATA-less
YER112W	LSM4	TFIID	TATA-less
YGL114W	YGL114W	CR	TATA-less
YOR051C	ETT1	TFIID	TATA-less
YML129C	COX14	TFIID	TATA-less
YDR211W	GCD6	TFIID	TATA-containing
YKL181W	PRS1	TFIID	TATA-less
YDL191W	RPL35A	TFIID	TATA-less
YDR483W	KRE2	TFIID	TATA-less
YJL167W	ERG20	CR	TATA-containing
YCR020W-B	HTL1	TFIID	TATA-less
YBR279W	PAF1	TFIID	TATA-less
YJL174W	KRE9	TFIID	TATA-less
YJR145C	RPS4A	TFIID	TATA-less
YOR260W	GCD1	TFIID	TATA-less
YOR317W	FAA1	TFIID	TATA-less
YNL037C	IDH1	CR	TATA-containing
YER049W	TPA1	TFIID	TATA-containing
YBR031W	RPL4A	TFIID	TATA-containing
YKL016C	ATP7	TFIID	TATA-containing
YOR184W	SER1	CR	TATA-containing
YER141W	COX15	TFIID	TATA-containing
YLR106C	MDN1	TFIID	TATA-less
YER155C	BEM2	TFIID	TATA-less
YGR065C	VHT1	CR	TATA-less
YDR309C	GIC2	CR	TATA-containing
YER110C	KAP123	TFIID	TATA-less
YHR019C	DED81	TFIID	TATA-less
YDR372C	VPS74	TFIID	TATA-less
YBR071W	YBR071W	CR	TATA-less
YDR308C	SRB7	TFIID	TATA-less
YKL160W	ELF1	TFIID	TATA-less
YDL132W	CDC53	TFIID	TATA-less
YPR062W	FCY1	TFIID	TATA-less
YOR123C	LEO1	TFIID	TATA-less
YDL066W	IDP1	CR	TATA-less
YBL004W	UTP20	TFIID	TATA-less
YCR028C-A	RIM1	TFIID	TATA-less
YNL137C	NAM9	TFIID	TATA-less
YPL158C	AIM44	CR	TATA-containing
YLR244C	MAP1	TFIID	TATA-less
YPR028W	YOP1	CR	TATA-less
YNL084C	END3	TFIID	TATA-less
YGR270W	YTA7	TFIID	TATA-less
YOL081W	IRA2	TFIID	TATA-less
YDR074W	TPS2	CR	TATA-less
YBL051C	PIN4	TFIID	TATA-less
YGL137W	SEC27	TFIID	TATA-less
YBL047C	EDE1	TFIID	TATA-less
YLR196W	PWP1	TFIID	TATA-containing
YDL195W	SEC31	TFIID	TATA-less
YGL252C	RTG2	TFIID	TATA-less
YKR066C	CCP1	CR	TATA-less
YHR208W	BAT1	TFIID	TATA-less
YNL307C	MCK1	TFIID	TATA-less
YIR017C	MET28	CR	TATA-less
YPL126W	NAN1	TFIID	TATA-less
YDR529C	QCR7	TFIID	TATA-less
YDL134C	PPH21	TFIID	TATA-less
YLR025W	SNF7	TFIID	TATA-containing
YDL136W	RPL35B	TFIID	TATA-less
YDR168W	CDC37	TFIID	TATA-less
YJR076C	CDC11	TFIID	TATA-less
YDR025W	RPS11A	TFIID	TATA-less
YOR194C	TOA1	TFIID	TATA-containing
YMR311C	GLC8	TFIID	TATA-less
YGR187C	HGH1	TFIID	TATA-less
YOR014W	RTS1	TFIID	TATA-less
YHR089C	GAR1	TFIID	TATA-less
YLR406C	RPL31B	TFIID	TATA-less
YPL235W	RVB2	TFIID	TATA-less
YLR399C	BDF1	CR	TATA-less
YPL169C	MEX67	TFIID	TATA-containing
YBR221C	PDB1	TFIID	TATA-less
YMR195W	ICY1	CR	TATA-containing
YMR266W	RSN1	CR	TATA-containing
YFR001W	LOC1	TFIID	TATA-less
YBL079W	NUP170	TFIID	TATA-less
YDL031W	DBP10	TFIID	TATA-less
YLR387C	REH1	TFIID	TATA-less
YFR030W	MET10	TFIID	TATA-containing
YBR191W	RPL21A	TFIID	TATA-less
YLR449W	FPR4	TFIID	TATA-less
YGR281W	YOR1	CR	TATA-containing
YDR404C	RPB7	TFIID	TATA-less
YPL063W	TIM50	TFIID	TATA-less
YML108W	YML108W	TFIID	TATA-containing
YHR205W	SCH9	TFIID	TATA-less
YDL153C	SAS10	TFIID	TATA-less
YLR452C	SST2	CR	TATA-less
YJL158C	CIS3	CR	TATA-containing
YLL018C	DPS1	TFIID	TATA-less
YDR069C	DOA4	CR	TATA-containing
YBR039W	ATP3	TFIID	TATA-less
YGL167C	PMR1	TFIID	TATA-less
YHR068W	DYS1	TFIID	TATA-less
YBR207W	FTH1	TFIID	TATA-less
YER125W	RSP5	TFIID	TATA-less
YDR303C	RSC3	TFIID	TATA-less
YGL092W	NUP145	TFIID	TATA-less
YJL123C	MTC1	TFIID	TATA-less
YOL097C	WRS1	TFIID	TATA-less
YOR362C	PRE10	TFIID	TATA-less
YKL007W	CAP1	TFIID	TATA-less
YHR066W	SSF1	TFIID	TATA-less
YGR119C	NUP57	TFIID	TATA-less
YDR324C	UTP4	TFIID	TATA-less
YGL202W	ARO8	TFIID	TATA-less
YDR322C-A	TIM11	TFIID	TATA-containing
YKL195W	MIA40	TFIID	TATA-less
YDR052C	DBF4	TFIID	TATA-less
YDR245W	MNN10	TFIID	TATA-less
YML008C	ERG6	CR	TATA-less
YMR083W	ADH3	TFIID	TATA-containing
YBR172C	SMY2	TFIID	TATA-less
YJR137C	MET5	TFIID	TATA-containing
YML053C	YML053C	TFIID	TATA-less
YDL100C	GET3	TFIID	TATA-less
YLR208W	SEC13	TFIID	TATA-less
YDR145W	TAF12	TFIID	TATA-containing
YDR412W	RRP17	TFIID	TATA-less
YHR098C	SFB3	TFIID	TATA-less
YGR284C	ERV29	TFIID	TATA-less
YML117W	NAB6	TFIID	TATA-less
YIL109C	SEC24	TFIID	TATA-less
YOR182C	RPS30B	TFIID	TATA-less
YML072C	TCB3	TFIID	TATA-less
YDL205C	HEM3	CR	TATA-containing
YDR208W	MSS4	TFIID	TATA-less
YLR403W	SFP1	TFIID	TATA-less
YNL302C	RPS19B	TFIID	TATA-less
YOR058C	ASE1	TFIID	TATA-less
YDR251W	PAM1	TFIID	TATA-less
YDR361C	BCP1	TFIID	TATA-less
YDR170C	SEC7	TFIID	TATA-less
YHR023W	MYO1	TFIID	TATA-less
YPL218W	SAR1	TFIID	TATA-less
YLR309C	IMH1	TFIID	TATA-less
YHR010W	RPL27A	TFIID	TATA-less
YJR073C	OPI3	CR	TATA-less
YLR192C	HCR1	TFIID	TATA-containing
YDL004W	ATP16	TFIID	TATA-less
YJR002W	MPP10	TFIID	TATA-less
YMR033W	ARP9	TFIID	TATA-containing
YNL247W	YNL247W	TFIID	TATA-less
YOR047C	STD1	CR	TATA-less
YGL026C	TRP5	TFIID	TATA-less
YCR002C	CDC10	TFIID	TATA-less
YLR435W	TSR2	TFIID	TATA-less
YGR189C	CRH1	CR	TATA-containing
YDL015C	TSC13	TFIID	TATA-less
YDR457W	TOM1	TFIID	TATA-less
YKL135C	APL2	TFIID	TATA-less
YKL142W	MRP8	TFIID	TATA-less
YJR065C	ARP3	TFIID	TATA-less
YKL086W	SRX1	CR	TATA-containing
YDL051W	LHP1	TFIID	TATA-less
YLR129W	DIP2	TFIID	TATA-less
YKL014C	URB1	TFIID	TATA-less
YJL039C	NUP192	TFIID	TATA-less
YJL122W	ALB1	TFIID	TATA-less
YGL070C	RPB9	TFIID	TATA-less
YLL051C	FRE6	TFIID	TATA-containing
YER180C-A	SLO1	TFIID	TATA-less
YER042W	MXR1	CR	TATA-containing
YDL161W	ENT1	TFIID	TATA-less
YKL077W	YKL077W	TFIID	TATA-less
YLR170C	APS1	TFIID	TATA-less
YMR216C	SKY1	TFIID	TATA-less
YLR223C	IFH1	TFIID	TATA-less
YNL271C	BNI1	TFIID	TATA-less
YGL225W	VRG4	TFIID	TATA-containing
YLR206W	ENT2	TFIID	TATA-less
YER117W	RPL23B	TFIID	TATA-less
YNR035C	ARC35	TFIID	TATA-containing
YGL117W	YGL117W	CR	TATA-containing
YOR187W	TUF1	TFIID	TATA-less
YMR109W	MYO5	TFIID	TATA-less
YNL213C	RRG9	TFIID	TATA-less
YNL055C	POR1	CR	TATA-containing
YOL038W	PRE6	TFIID	TATA-less
YER161C	SPT2	TFIID	TATA-less
YJL179W	PFD1	TFIID	TATA-less
YLR225C	YLR225C	CR	TATA-containing
YLL048C	YBT1	TFIID	TATA-containing
YDR300C	PRO1	TFIID	TATA-less
YPR133C	SPN1	TFIID	TATA-less
YHL047C	ARN2	CR	TATA-less
YML048W	GSF2	CR	TATA-containing
YOL076W	MDM20	TFIID	TATA-less
YPR173C	VPS4	TFIID	TATA-less
YIL128W	MET18	TFIID	TATA-less
YLR378C	SEC61	TFIID	TATA-less
YKR001C	VPS1	TFIID	TATA-less
YHR081W	LRP1	TFIID	TATA-less
YNL175C	NOP13	TFIID	TATA-less
YFR009W	GCN20	TFIID	TATA-containing
YDL022W	GPD1	CR	TATA-containing
YGL068W	MNP1	TFIID	TATA-less
YBR112C	CYC8	TFIID	TATA-less
YMR080C	NAM7	TFIID	TATA-less
YGR214W	RPS0A	TFIID	TATA-less
YPR029C	APL4	TFIID	TATA-less
YER086W	ILV1	TFIID	TATA-less
YMR200W	ROT1	TFIID	TATA-containing
YDR432W	NPL3	TFIID	TATA-containing
YCR035C	RRP43	TFIID	TATA-containing
YMR031C	EIS1	CR	TATA-less
YLR250W	SSP120	TFIID	TATA-less
YKR035W-A	DID2	TFIID	TATA-containing
YIL027C	EMC5	TFIID	TATA-containing
YHL040C	ARN1	CR	TATA-less
YCR016W	YCR016W	TFIID	TATA-containing
YGR271C-A	EFG1	TFIID	TATA-containing
YDL121C	YDL121C	TFIID	TATA-less
YPR148C	YPR148C	TFIID	TATA-less
YLR330W	CHS5	TFIID	TATA-less
YLR222C	UTP13	TFIID	TATA-less
YDR510W	SMT3	TFIID	TATA-less
YIL040W	APQ12	TFIID	TATA-containing
YDL002C	NHP10	TFIID	TATA-less
YNR001C	CIT1	CR	TATA-containing
YDL099W	BUG1	TFIID	TATA-less
YDR339C	FCF1	TFIID	TATA-less
YMR043W	MCM1	CR	TATA-less
YML069W	POB3	TFIID	TATA-containing
YLR168C	UPS2	CR	TATA-less
YML010W	SPT5	TFIID	TATA-containing
YLL009C	COX17	TFIID	TATA-less
YEL015W	EDC3	TFIID	TATA-less
YLL008W	DRS1	TFIID	TATA-containing
YBR173C	UMP1	TFIID	TATA-less
YIL130W	ASG1	TFIID	TATA-less
YGR083C	GCD2	TFIID	TATA-less
YOR028C	CIN5	CR	TATA-containing
YER138W-A	YER138W-A	CR	TATA-less
YIL074C	SER33	TFIID	TATA-less
YJR064W	CCT5	TFIID	TATA-less
YOR239W	ABP140	TFIID	TATA-containing
YMR049C	ERB1	TFIID	TATA-less
YNL186W	UBP10	TFIID	TATA-less
YGR105W	VMA21	TFIID	TATA-containing
YPL010W	RET3	TFIID	TATA-less
YPR112C	MRD1	TFIID	TATA-containing
YBR248C	HIS7	TFIID	TATA-less
YNL077W	APJ1	TFIID	TATA-less
YOR020W-A	YOR020W-A	TFIID	TATA-less
YPL032C	SVL3	TFIID	TATA-less
YDL225W	SHS1	TFIID	TATA-less
YGR180C	RNR4	CR	TATA-containing
YKL212W	SAC1	TFIID	TATA-less
YMR290C	HAS1	TFIID	TATA-less
YLR256W	HAP1	CR	TATA-containing
YJR090C	GRR1	TFIID	TATA-less
YBR048W	RPS11B	CR	TATA-less
YHR088W	RPF1	TFIID	TATA-containing
YHL036W	MUP3	CR	TATA-containing
YIL036W	CST6	TFIID	TATA-less
YBL105C	PKC1	TFIID	TATA-containing
YJR044C	VPS55	TFIID	TATA-less
YNL176C	TDA7	CR	TATA-containing
YOR158W	PET123	TFIID	TATA-less
YKL175W	ZRT3	TFIID	TATA-less
YGL086W	MAD1	TFIID	TATA-less
YER105C	NUP157	TFIID	TATA-containing
YEL022W	GEA2	TFIID	TATA-containing
YBR017C	KAP104	TFIID	TATA-less
YPR144C	NOC4	TFIID	TATA-less
YBR171W	SEC66	TFIID	TATA-less
YDL088C	ASM4	TFIID	TATA-less
YEL002C	WBP1	TFIID	TATA-less
YHR039C-A	VMA10	TFIID	TATA-less
YNL123W	NMA111	TFIID	TATA-less
YIL144W	NDC80	TFIID	TATA-less
YFL034C-A	RPL22B	TFIID	TATA-less
YNL177C	MRPL22	TFIID	TATA-less
YLR153C	ACS2	CR	TATA-containing
YPR048W	TAH18	TFIID	TATA-containing
YPL217C	BMS1	TFIID	TATA-less
YLR200W	YKE2	TFIID	TATA-containing
YJL076W	NET1	TFIID	TATA-less
YER056C-A	RPL34A	TFIID	TATA-less
YLR163C	MAS1	TFIID	TATA-less
YLR022C	SDO1	TFIID	TATA-containing
YER068W	MOT2	TFIID	TATA-less
YPR060C	ARO7	TFIID	TATA-less
YHL020C	OPI1	TFIID	TATA-less
YDL005C	MED2	TFIID	TATA-less
YIL105C	SLM1	TFIID	TATA-containing
YMR010W	YMR010W	TFIID	TATA-less
YAL029C	MYO4	TFIID	TATA-less
YJL026W	RNR2	CR	TATA-containing
YGR009C	SEC9	TFIID	TATA-containing
YMR090W	YMR090W	CR	TATA-less
YOL028C	YAP7	TFIID	TATA-less
YIL076W	SEC28	TFIID	TATA-containing
YBL058W	SHP1	TFIID	TATA-less
YBR047W	FMP23	TFIID	TATA-less
YBR069C	TAT1	CR	TATA-containing
YOL036W	YOL036W	TFIID	TATA-containing
YER050C	RSM18	TFIID	TATA-less
YCR084C	TUP1	TFIID	TATA-less
YOL064C	MET22	TFIID	TATA-containing
YLR034C	SMF3	CR	TATA-containing
YPR101W	SNT309	TFIID	TATA-containing
YLR229C	CDC42	TFIID	TATA-less
YJR070C	LIA1	TFIID	TATA-containing
YPR168W	NUT2	TFIID	TATA-less
YLR287C	YLR287C	TFIID	TATA-less
YKL032C	IXR1	TFIID	TATA-less
YGR233C	PHO81	TFIID	TATA-less
YDR354W	TRP4	TFIID	TATA-less
YJR004C	SAG1	CR	TATA-less
YKR016W	MIC60	TFIID	TATA-less
YGL071W	AFT1	TFIID	TATA-less
YLL039C	UBI4	CR	TATA-containing
YER094C	PUP3	TFIID	TATA-less
YDL065C	PEX19	TFIID	TATA-less
YOR141C	ARP8	TFIID	TATA-less
YLL027W	ISA1	CR	TATA-less
YER120W	SCS2	TFIID	TATA-less
YOR045W	TOM6	TFIID	TATA-containing
YBR046C	ZTA1	CR	TATA-less
YKR068C	BET3	TFIID	TATA-less
YDL155W	CLB3	TFIID	TATA-less
YOR116C	RPO31	TFIID	TATA-less
YJL166W	QCR8	TFIID	TATA-less
YDL106C	PHO2	TFIID	TATA-less
YER151C	UBP3	TFIID	TATA-less
YDR525W-A	SNA2	TFIID	TATA-less
YBR164C	ARL1	TFIID	TATA-containing
YDR129C	SAC6	TFIID	TATA-containing
YDL190C	UFD2	TFIID	TATA-less
YDR449C	UTP6	TFIID	TATA-less
YMR091C	NPL6	TFIID	TATA-containing
YDR356W	SPC110	TFIID	TATA-less
YDR266C	HEL2	TFIID	TATA-less
YEL055C	POL5	TFIID	TATA-less
YGL120C	PRP43	TFIID	TATA-less
YMR014W	BUD22	TFIID	TATA-containing
YKR043C	SHB17	TFIID	TATA-containing
YDR292C	SRP101	TFIID	TATA-less
YDR165W	TRM82	TFIID	TATA-less
YLR027C	AAT2	CR	TATA-containing
YDR188W	CCT6	TFIID	TATA-less
YLR335W	NUP2	TFIID	TATA-less
YNL243W	SLA2	TFIID	TATA-containing
YOR195W	SLK19	TFIID	TATA-less
YBR198C	TAF5	TFIID	TATA-less
YJL144W	YJL144W	CR	TATA-containing
YNL267W	PIK1	TFIID	TATA-less
YPR086W	SUA7	TFIID	TATA-containing
YLL011W	SOF1	TFIID	TATA-less
YPR167C	MET16	TFIID	TATA-containing
YLR083C	EMP70	TFIID	TATA-less
YNL169C	PSD1	CR	TATA-containing
YPL129W	TAF14	TFIID	TATA-less
YGR089W	NNF2	TFIID	TATA-less
YOR281C	PLP2	TFIID	TATA-less
YOL061W	PRS5	TFIID	TATA-less
YGR026W	YGR026W	TFIID	TATA-less
YMR197C	VTI1	TFIID	TATA-containing
YGR061C	ADE6	TFIID	TATA-less
YOR061W	CKA2	TFIID	TATA-containing
YML018C	YML018C	TFIID	TATA-containing
YNR061C	YNR061C	TFIID	TATA-less
YLR436C	ECM30	TFIID	TATA-less
YDR186C	YDR186C	TFIID	TATA-less
YNL059C	ARP5	TFIID	TATA-containing
YGL115W	SNF4	TFIID	TATA-less
YCL035C	GRX1	TFIID	TATA-containing
YNL103W	MET4	TFIID	TATA-less
YBR247C	ENP1	TFIID	TATA-less
YDL224C	WHI4	TFIID	TATA-less
YPL009C	RQC2	TFIID	TATA-less
YNL032W	SIW14	TFIID	TATA-less
YDR101C	ARX1	TFIID	TATA-less
YER019C-A	SBH2	TFIID	TATA-less
YLR384C	IKI3	TFIID	TATA-less
YJR005W	APL1	TFIID	TATA-less
YOR147W	MDM32	TFIID	TATA-less
YPR113W	PIS1	CR	TATA-containing
YAR002C-A	ERP1	TFIID	TATA-containing
YIL052C	RPL34B	TFIID	TATA-less
YOR098C	NUP1	TFIID	TATA-less
YGL080W	MPC1	TFIID	TATA-less
YHL001W	RPL14B	TFIID	TATA-less
YLL010C	PSR1	TFIID	TATA-less
YER048C	CAJ1	TFIID	TATA-less
YDR257C	RKM4	TFIID	TATA-less
YGR078C	PAC10	TFIID	TATA-containing
YHR108W	GGA2	TFIID	TATA-less
YCR077C	PAT1	TFIID	TATA-less
YEL063C	CAN1	TFIID	TATA-less
YML004C	GLO1	TFIID	TATA-containing
YPR163C	TIF3	TFIID	TATA-less
YGR134W	CAF130	TFIID	TATA-less
YJR060W	CBF1	TFIID	TATA-less
YBL039C	URA7	TFIID	TATA-less
YBR181C	RPS6B	TFIID	TATA-less
YNL155W	CUZ1	TFIID	TATA-less
YHL003C	LAG1	TFIID	TATA-less
YIL021W	RPB3	TFIID	TATA-less
YFR039C	OSW7	TFIID	TATA-less
YKL088W	CAB3	TFIID	TATA-less
YDL058W	USO1	TFIID	TATA-less
YJL154C	VPS35	TFIID	TATA-containing
YGR186W	TFG1	TFIID	TATA-less
YJL041W	NSP1	TFIID	TATA-less
YKR082W	NUP133	TFIID	TATA-containing
YDR176W	NGG1	TFIID	TATA-less
YCR008W	SAT4	TFIID	TATA-containing
YOR327C	SNC2	TFIID	TATA-less
YCR106W	RDS1	TFIID	TATA-less
YMR054W	STV1	TFIID	TATA-less
YOR342C	YOR342C	TFIID	TATA-less
YLR190W	MMR1	TFIID	TATA-containing
YHR065C	RRP3	TFIID	TATA-less
YAR002W	NUP60	TFIID	TATA-less
YLR008C	PAM18	TFIID	TATA-less
YJL171C	YJL171C	CR	TATA-less
YDR351W	SBE2	TFIID	TATA-less
YPL228W	CET1	TFIID	TATA-less
YGR145W	ENP2	TFIID	TATA-containing
YMR062C	ARG7	TFIID	TATA-containing
YDR003W	RCR2	TFIID	TATA-less
YDR519W	FPR2	TFIID	TATA-less
YHR099W	TRA1	TFIID	TATA-less
YKL065C	YET1	TFIID	TATA-less
YKL094W	YJU3	TFIID	TATA-containing
YGR033C	TIM21	TFIID	TATA-less
YMR100W	MUB1	TFIID	TATA-less
YHR199C	AIM46	CR	TATA-less
YKL020C	SPT23	TFIID	TATA-less
YIL022W	TIM44	TFIID	TATA-less
YJL143W	TIM17	TFIID	TATA-less
YLR409C	UTP21	TFIID	TATA-less
YJL117W	PHO86	TFIID	TATA-less
YPL094C	SEC62	TFIID	TATA-less
YGL014W	PUF4	TFIID	TATA-less
YHR111W	UBA4	TFIID	TATA-containing
YGR040W	KSS1	CR	TATA-containing
YIL115C	NUP159	TFIID	TATA-containing
YPL013C	MRPS16	TFIID	TATA-less
YJL050W	MTR4	TFIID	TATA-containing
YLR395C	COX8	TFIID	TATA-less
YJL145W	SFH5	TFIID	TATA-less
YLR056W	ERG3	CR	TATA-containing
YJR016C	ILV3	CR	TATA-containing
YNL149C	PGA2	TFIID	TATA-less
YGR198W	YPP1	TFIID	TATA-less
YLR295C	ATP14	TFIID	TATA-less
YOR207C	RET1	TFIID	TATA-containing
YJL212C	OPT1	CR	TATA-containing
YPL259C	APM1	TFIID	TATA-less
YDR083W	RRP8	TFIID	TATA-containing
YLR058C	SHM2	TFIID	TATA-containing
YKL205W	LOS1	TFIID	TATA-less
YLR398C	SKI2	TFIID	TATA-containing
YPR159W	KRE6	TFIID	TATA-less
YLR359W	ADE13	TFIID	TATA-containing
YLR344W	RPL26A	TFIID	TATA-less
YJR046W	TAH11	TFIID	TATA-less
YCR057C	PWP2	TFIID	TATA-less
YGL150C	INO80	TFIID	TATA-less
YBL036C	YBL036C	TFIID	TATA-less
YMR243C	ZRC1	TFIID	TATA-less
YHR103W	SBE22	TFIID	TATA-less
YIL070C	MAM33	TFIID	TATA-less
YDR452W	PPN1	TFIID	TATA-less
YDL047W	SIT4	TFIID	TATA-less
YDL040C	NAT1	TFIID	TATA-less
YMR089C	YTA12	TFIID	TATA-less
YDR055W	PST1	CR	TATA-containing
YOL006C	TOP1	TFIID	TATA-less
YGR193C	PDX1	TFIID	TATA-containing
YBR059C	AKL1	TFIID	TATA-less
YNR043W	MVD1	TFIID	TATA-containing
YJR010W	MET3	TFIID	TATA-less
YPL028W	ERG10	TFIID	TATA-containing
YJR041C	URB2	TFIID	TATA-less
YDR385W	EFT2	TFIID	TATA-containing
YOR304W	ISW2	TFIID	TATA-less
YDR045C	RPC11	TFIID	TATA-less
YOR216C	RUD3	TFIID	TATA-less
YDR472W	TRS31	TFIID	TATA-containing
YJL004C	SYS1	TFIID	TATA-less
YDR463W	STP1	TFIID	TATA-containing
YDL111C	RRP42	TFIID	TATA-less
YKL068W	NUP100	TFIID	TATA-less
YGR178C	PBP1	TFIID	TATA-containing
YPL137C	GIP3	TFIID	TATA-less
YOR222W	ODC2	CR	TATA-less
YGR060W	ERG25	CR	TATA-containing
YOR107W	RGS2	CR	TATA-containing
YAR014C	BUD14	TFIID	TATA-less
YDR320C-A	DAD4	TFIID	TATA-less
YFR037C	RSC8	TFIID	TATA-less
YBR088C	POL30	CR	TATA-containing
YHR206W	SKN7	TFIID	TATA-less
YDR068W	DOS2	TFIID	TATA-less
YCL059C	KRR1	TFIID	TATA-less
YOR305W	RRG7	TFIID	TATA-containing
YJL128C	PBS2	TFIID	TATA-less
YHR148W	IMP3	TFIID	TATA-less
YAL007C	ERP2	TFIID	TATA-less
YGL184C	STR3	CR	TATA-containing
YHR104W	GRE3	CR	TATA-less
YLR418C	CDC73	TFIID	TATA-less
YNL258C	DSL1	TFIID	TATA-less
YPR089W	YPR089W	TFIID	TATA-less
YLL013C	PUF3	TFIID	TATA-less
YOL051W	GAL11	TFIID	TATA-less
YMR047C	NUP116	TFIID	TATA-less
YDR298C	ATP5	TFIID	TATA-less
YOL098C	YOL098C	TFIID	TATA-less
YAL041W	CDC24	TFIID	TATA-containing
YOR243C	PUS7	TFIID	TATA-less
YGR195W	SKI6	TFIID	TATA-less
YHL007C	STE20	TFIID	TATA-less
YLR248W	RCK2	TFIID	TATA-less
YKL101W	HSL1	CR	TATA-less
YOL126C	MDH2	CR	TATA-containing
YBR256C	RIB5	CR	TATA-containing
YGR280C	PXR1	TFIID	TATA-less
YFL008W	SMC1	TFIID	TATA-less
YBL026W	LSM2	TFIID	TATA-less
YPL271W	ATP15	TFIID	TATA-less
YLR314C	CDC3	TFIID	TATA-less
YOL119C	MCH4	CR	TATA-less
YMR319C	FET4	CR	TATA-containing
YLR224W	YLR224W	TFIID	TATA-less
YNL138W	SRV2	TFIID	TATA-containing
YLR410W	VIP1	TFIID	TATA-less
YDR227W	SIR4	TFIID	TATA-less
YGL101W	YGL101W	TFIID	TATA-containing
YBR249C	ARO4	CR	TATA-containing
YNR067C	DSE4	CR	TATA-containing
YNL001W	DOM34	TFIID	TATA-less
YDR006C	SOK1	TFIID	TATA-containing
YBR287W	YBR287W	TFIID	TATA-containing
YNL004W	HRB1	TFIID	TATA-less
YKL190W	CNB1	TFIID	TATA-less
YOR162C	YRR1	TFIID	TATA-containing
YOR212W	STE4	TFIID	TATA-less
YGR191W	HIP1	TFIID	TATA-less
YER008C	SEC3	TFIID	TATA-less
YKL058W	TOA2	TFIID	TATA-less
YGL246C	RAI1	TFIID	TATA-less
YNL132W	KRE33	TFIID	TATA-less
YOR244W	ESA1	TFIID	TATA-less
YDR507C	GIN4	TFIID	TATA-less
YKL061W	BLI1	TFIID	TATA-less
YJR003C	YJR003C	CR	TATA-less
YNL263C	YIF1	TFIID	TATA-less
YNL192W	CHS1	CR	TATA-containing
YJL036W	SNX4	TFIID	TATA-containing
YOL012C	HTZ1	TFIID	TATA-less
YNL297C	MON2	TFIID	TATA-less
YDL063C	SYO1	TFIID	TATA-less
YBR036C	CSG2	TFIID	TATA-less
YMR044W	IOC4	TFIID	TATA-containing
YDR500C	RPL37B	TFIID	TATA-less
YOR354C	MSC6	TFIID	TATA-less
YKL004W	AUR1	TFIID	TATA-less
YPL011C	TAF3	TFIID	TATA-less
YJL010C	NOP9	TFIID	TATA-less
YDL212W	SHR3	TFIID	TATA-containing
YNL135C	FPR1	CR	TATA-less
YNL130C	CPT1	CR	TATA-less
YOL021C	DIS3	TFIID	TATA-less
YGL108C	YGL108C	TFIID	TATA-containing
YDR169C	STB3	TFIID	TATA-less
YNL313C	EMW1	TFIID	TATA-less
YCR034W	ELO2	TFIID	TATA-less
YML001W	YPT7	TFIID	TATA-less
YDL171C	GLT1	TFIID	TATA-less
YLR003C	CMS1	TFIID	TATA-containing
YER063W	THO1	TFIID	TATA-containing
YKR063C	LAS1	TFIID	TATA-less
YDL072C	YET3	TFIID	TATA-containing
YKL176C	LST4	TFIID	TATA-less
YIR033W	MGA2	TFIID	TATA-less
YKL185W	ASH1	CR	TATA-containing
YKL044W	YKL044W	CR	TATA-less
YDR005C	MAF1	TFIID	TATA-containing
YNL191W	DUG3	TFIID	TATA-containing
YNR019W	ARE2	CR	TATA-less
YBL064C	PRX1	CR	TATA-containing
YNL041C	COG6	TFIID	TATA-containing
YKL143W	LTV1	TFIID	TATA-less
YLR071C	RGR1	TFIID	TATA-less
YLR026C	SED5	TFIID	TATA-less
YNL272C	SEC2	TFIID	TATA-less
YOR227W	HER1	CR	TATA-less
YOR285W	RDL1	TFIID	TATA-containing
YKL087C	CYT2	TFIID	TATA-containing
YBR122C	MRPL36	TFIID	TATA-less
YJR042W	NUP85	TFIID	TATA-less
YCR003W	MRPL32	TFIID	TATA-less
YLR028C	ADE16	TFIID	TATA-containing
YJL104W	PAM16	TFIID	TATA-containing
YDL226C	GCS1	TFIID	TATA-less
YOR372C	NDD1	TFIID	TATA-less
YOL020W	TAT2	TFIID	TATA-less
YDR210W	YDR210W	CR	TATA-containing
YGR183C	QCR9	TFIID	TATA-less
YDR262W	YDR262W	TFIID	TATA-containing
YML086C	ALO1	TFIID	TATA-less
YIL041W	GVP36	TFIID	TATA-less
YGR245C	SDA1	TFIID	TATA-containing
YNR038W	DBP6	TFIID	TATA-less
YER022W	SRB4	TFIID	TATA-containing
YDL035C	GPR1	TFIID	TATA-containing
YJR125C	ENT3	TFIID	TATA-less
YCL030C	HIS4	CR	TATA-containing
YLL021W	SPA2	TFIID	TATA-less
YOR159C	SME1	TFIID	TATA-less
YPL059W	GRX5	TFIID	TATA-less
YLR052W	IES3	TFIID	TATA-less
YGL106W	MLC1	TFIID	TATA-less
YDR527W	RBA50	TFIID	TATA-less
YIL112W	HOS4	TFIID	TATA-less
YOR375C	GDH1	CR	TATA-containing
YOR165W	SEY1	TFIID	TATA-less
YFL013C	IES1	TFIID	TATA-containing
YKL033W-A	YKL033W-A	TFIID	TATA-less
YNL221C	POP1	TFIID	TATA-less
YEL003W	GIM4	TFIID	TATA-less
YOR142W	LSC1	CR	TATA-containing
YBR126C	TPS1	CR	TATA-containing
YNR031C	SSK2	TFIID	TATA-less
YMR001C-A	YMR001C-A	CR	TATA-less
YMR291W	TDA1	CR	TATA-less
YMR093W	UTP15	TFIID	TATA-less
YJL192C	SOP4	TFIID	TATA-containing
YMR212C	EFR3	TFIID	TATA-less
YPR097W	YPR097W	TFIID	TATA-less
YNL268W	LYP1	TFIID	TATA-less
YLR336C	SGD1	TFIID	TATA-containing
YGL233W	SEC15	TFIID	TATA-less
YGR207C	CIR1	TFIID	TATA-less
YNL010W	YNL010W	TFIID	TATA-less
YGR184C	UBR1	TFIID	TATA-containing
YPL195W	APL5	TFIID	TATA-less
YDR378C	LSM6	TFIID	TATA-less
YBR253W	SRB6	TFIID	TATA-less
YIL056W	VHR1	CR	TATA-containing
YOR085W	OST3	TFIID	TATA-less
YHR026W	VMA16	TFIID	TATA-less
YDL112W	TRM3	TFIID	TATA-containing
YLR357W	RSC2	TFIID	TATA-less
YDL198C	GGC1	CR	TATA-less
YPR105C	COG4	TFIID	TATA-less
YBR054W	YRO2	CR	TATA-containing
YOR311C	DGK1	TFIID	TATA-containing
YHR006W	STP2	TFIID	TATA-less
YKR100C	SKG1	TFIID	TATA-less
YGL013C	PDR1	TFIID	TATA-less
YPL053C	KTR6	TFIID	TATA-containing
YJR134C	SGM1	TFIID	TATA-less
YOR241W	MET7	TFIID	TATA-containing
YLL034C	RIX7	TFIID	TATA-less
YGL038C	OCH1	CR	TATA-less
YKL204W	EAP1	TFIID	TATA-less
YDR146C	SWI5	TFIID	TATA-less
YKR031C	SPO14	TFIID	TATA-less
YPR125W	YLH47	TFIID	TATA-less
YKR061W	KTR2	CR	TATA-containing
YMR255W	GFD1	TFIID	TATA-less
YNL236W	SIN4	TFIID	TATA-containing
YOR191W	ULS1	TFIID	TATA-less
YIL030C	SSM4	TFIID	TATA-less
YBR179C	FZO1	TFIID	TATA-less
YDR034C	LYS14	TFIID	TATA-less
YDR219C	MFB1	TFIID	TATA-less
YOR103C	OST2	TFIID	TATA-less
YNL006W	LST8	TFIID	TATA-less
YDR333C	RQC1	TFIID	TATA-less
YDR027C	VPS54	TFIID	TATA-containing
YKR093W	PTR2	CR	TATA-containing
YHR020W	YHR020W	TFIID	TATA-less
YJL098W	SAP185	TFIID	TATA-less
YNL239W	LAP3	CR	TATA-less
YEL061C	CIN8	TFIID	TATA-less
YGL140C	YGL140C	TFIID	TATA-less
YPR070W	MED1	TFIID	TATA-less
YBL007C	SLA1	TFIID	TATA-less
YNR068C	YNR068C	TFIID	TATA-less
YBR142W	MAK5	TFIID	TATA-less
YLR113W	HOG1	CR	TATA-less
YER129W	SAK1	TFIID	TATA-less
YNL252C	MRPL17	TFIID	TATA-less
YER127W	LCP5	TFIID	TATA-less
YDR087C	RRP1	TFIID	TATA-containing
YMR140W	SIP5	TFIID	TATA-containing
YDR515W	SLF1	TFIID	TATA-less
YGR158C	MTR3	TFIID	TATA-less
YOR376W-A	YOR376W-A	TFIID	TATA-less
YMR256C	COX7	TFIID	TATA-less
YER092W	IES5	TFIID	TATA-containing
YHR201C	PPX1	TFIID	TATA-less
YJL176C	SWI3	TFIID	TATA-less
YFL036W	RPO41	TFIID	TATA-less
YDR468C	TLG1	TFIID	TATA-less
YDL003W	MCD1	CR	TATA-containing
YLR019W	PSR2	TFIID	TATA-containing
YDR407C	TRS120	TFIID	TATA-containing
YFL048C	EMP47	TFIID	TATA-less
YLR181C	VTA1	TFIID	TATA-less
YOR157C	PUP1	TFIID	TATA-less
YGR200C	ELP2	TFIID	TATA-less
YOR021C	SFM1	TFIID	TATA-less
YDR328C	SKP1	TFIID	TATA-containing
YMR153W	NUP53	TFIID	TATA-less
YER082C	UTP7	TFIID	TATA-less
YJL196C	ELO1	CR	TATA-containing
YJL183W	MNN11	TFIID	TATA-containing
YDR081C	PDC2	TFIID	TATA-less
YER166W	DNF1	TFIID	TATA-less
YBR140C	IRA1	TFIID	TATA-containing
YJR091C	JSN1	TFIID	TATA-less
YLR084C	RAX2	CR	TATA-less
YJR092W	BUD4	TFIID	TATA-less
YDR326C	YSP2	TFIID	TATA-containing
YBL085W	BOI1	TFIID	TATA-less
YHR049W	FSH1	CR	TATA-containing
YNR022C	MRPL50	TFIID	TATA-containing
YLR182W	SWI6	TFIID	TATA-less
YKR092C	SRP40	TFIID	TATA-less
YIL094C	LYS12	TFIID	TATA-containing
YGL151W	NUT1	TFIID	TATA-less
YGR072W	UPF3	TFIID	TATA-less
YOR283W	YOR283W	TFIID	TATA-less
YDR150W	NUM1	TFIID	TATA-less
YHL002W	HSE1	TFIID	TATA-less
YBR149W	ARA1	CR	TATA-containing
YGL090W	LIF1	TFIID	TATA-less
YNL216W	RAP1	TFIID	TATA-less
YLR023C	IZH3	TFIID	TATA-less
YBL050W	SEC17	TFIID	TATA-less
YKL154W	SRP102	TFIID	TATA-less
YDL073W	YDL073W	TFIID	TATA-containing
YPL184C	MRN1	TFIID	TATA-less
YIL091C	UTP25	TFIID	TATA-less
YKL192C	ACP1	TFIID	TATA-less
YJL207C	LAA1	TFIID	TATA-less
YLR371W	ROM2	TFIID	TATA-less
YKL213C	DOA1	TFIID	TATA-containing
YNL156C	NSG2	TFIID	TATA-less
YDR390C	UBA2	TFIID	TATA-less
YPR008W	HAA1	TFIID	TATA-less
YNL039W	BDP1	TFIID	TATA-less
YEL001C	IRC22	TFIID	TATA-less
YDL085C-A	YDL085C-A	TFIID	TATA-less
YDR334W	SWR1	TFIID	TATA-less
YLR133W	CKI1	TFIID	TATA-less
YMR129W	POM152	TFIID	TATA-less
YJL069C	UTP18	TFIID	TATA-less
YOR323C	PRO2	TFIID	TATA-less
YLR370C	ARC18	TFIID	TATA-less
YMR305C	SCW10	CR	TATA-less
YML031W	NDC1	TFIID	TATA-less
YJR086W	STE18	TFIID	TATA-containing
YCR042C	TAF2	TFIID	TATA-less
YGL091C	NBP35	TFIID	TATA-containing
YBR165W	UBS1	TFIID	TATA-containing
YJL082W	IML2	CR	TATA-less
YER007C-A	TMA20	TFIID	TATA-less
YPR100W	MRPL51	TFIID	TATA-less
YNL219C	ALG9	TFIID	TATA-less
YOR145C	PNO1	TFIID	TATA-less
YOR048C	RAT1	TFIID	TATA-less
YKR067W	GPT2	TFIID	TATA-less
YDR166C	SEC5	TFIID	TATA-less
YDR337W	MRPS28	TFIID	TATA-less
YHR021C	RPS27B	TFIID	TATA-less
YNL167C	SKO1	TFIID	TATA-less
YEL007W	MIT1	CR	TATA-less
YAL019W	FUN30	TFIID	TATA-less
YOR124C	UBP2	TFIID	TATA-containing
YER176W	ECM32	TFIID	TATA-less
YMR149W	SWP1	TFIID	TATA-containing
YMR064W	AEP1	TFIID	TATA-less
YNL232W	CSL4	TFIID	TATA-less
YOR004W	UTP23	TFIID	TATA-less
YOR315W	SFG1	CR	TATA-less
YDL167C	NRP1	TFIID	TATA-less
YOR036W	PEP12	TFIID	TATA-containing
YGL231C	EMC4	TFIID	TATA-containing
YMR004W	MVP1	TFIID	TATA-less
YGR082W	TOM20	TFIID	TATA-less
YGR215W	RSM27	TFIID	TATA-less
YDR177W	UBC1	TFIID	TATA-less
YKL015W	PUT3	TFIID	TATA-less
YEL037C	RAD23	TFIID	TATA-less
YAL036C	RBG1	TFIID	TATA-less
YLR195C	NMT1	TFIID	TATA-less
YER164W	CHD1	TFIID	TATA-containing
YLR093C	NYV1	TFIID	TATA-containing
YLR291C	GCD7	TFIID	TATA-less
YML111W	BUL2	TFIID	TATA-less
YDR162C	NBP2	TFIID	TATA-less
YKL100C	YPF1	TFIID	TATA-containing
YJL060W	BNA3	TFIID	TATA-containing
YLR086W	SMC4	TFIID	TATA-less
YNL162W	RPL42A	TFIID	TATA-less
YKR026C	GCN3	TFIID	TATA-less
YAL040C	CLN3	CR	TATA-less
YJL110C	GZF3	TFIID	TATA-less
YOR307C	SLY41	TFIID	TATA-less
YBR002C	RER2	TFIID	TATA-less
YDR423C	CAD1	TFIID	TATA-less
YIL116W	HIS5	CR	TATA-containing
YDR505C	PSP1	TFIID	TATA-less
YDR477W	SNF1	TFIID	TATA-less
YEL043W	YEL043W	TFIID	TATA-less
YDL095W	PMT1	TFIID	TATA-less
YPL085W	SEC16	TFIID	TATA-less
YGL107C	RMD9	TFIID	TATA-less
YLR312W-A	MRPL15	TFIID	TATA-containing
YNR017W	TIM23	TFIID	TATA-less
YML015C	TAF11	TFIID	TATA-containing
YMR237W	BCH1	TFIID	TATA-less
YDR388W	RVS167	TFIID	TATA-less
YGR123C	PPT1	TFIID	TATA-less
YNL300W	TOS6	CR	TATA-containing
YDR331W	GPI8	TFIID	TATA-less
YKR062W	TFA2	TFIID	TATA-less
YPL084W	BRO1	TFIID	TATA-less
YPL183C	RTT10	TFIID	TATA-less
YGL082W	YGL082W	TFIID	TATA-less
YDR389W	SAC7	TFIID	TATA-containing
YNL188W	KAR1	TFIID	TATA-containing
YBR080C	SEC18	TFIID	TATA-less
YIR006C	PAN1	TFIID	TATA-containing
YGR274C	TAF1	TFIID	TATA-less
YBR187W	GDT1	TFIID	TATA-less
YPL143W	RPL33A	TFIID	TATA-less
YHR030C	SLT2	TFIID	TATA-containing
YMR077C	VPS20	TFIID	TATA-less
YPR189W	SKI3	TFIID	TATA-less
YMR024W	MRPL3	TFIID	TATA-containing
YJL044C	GYP6	TFIID	TATA-less
YDL240W	LRG1	TFIID	TATA-less
YML062C	MFT1	TFIID	TATA-less
YLR274W	MCM5	TFIID	TATA-less
YER080W	AIM9	TFIID	TATA-less
YOR001W	RRP6	TFIID	TATA-less
YKL126W	YPK1	TFIID	TATA-less
YMR099C	YMR099C	TFIID	TATA-less
YDR116C	MRPL1	TFIID	TATA-less
YLR298C	YHC1	TFIID	TATA-less
YBL061C	SKT5	TFIID	TATA-less
YKR059W	TIF1	TFIID	TATA-less
YLR332W	MID2	TFIID	TATA-less
YDR398W	UTP5	TFIID	TATA-less
YMR128W	ECM16	TFIID	TATA-containing
YGR250C	YGR250C	CR	TATA-containing
YOR234C	RPL33B	TFIID	TATA-less
YKR089C	TGL4	TFIID	TATA-less
YPR119W	CLB2	CR	TATA-less
YPR004C	AIM45	TFIID	TATA-less
YIL127C	RRT14	TFIID	TATA-less
YLR079W	SIC1	CR	TATA-containing
YIR004W	DJP1	TFIID	TATA-containing
YOR316C	COT1	TFIID	TATA-less
YPR161C	SGV1	TFIID	TATA-less
YLL014W	EMC6	TFIID	TATA-containing
YNL256W	FOL1	TFIID	TATA-less
YNL139C	THO2	TFIID	TATA-less
YOR340C	RPA43	TFIID	TATA-less
YNL306W	MRPS18	TFIID	TATA-less
YDR313C	PIB1	TFIID	TATA-less
YEL052W	AFG1	TFIID	TATA-less
YOR056C	NOB1	TFIID	TATA-less
YGL194C	HOS2	TFIID	TATA-less
YOR101W	RAS1	TFIID	TATA-less
YKR096W	ESL2	TFIID	TATA-less
YKL109W	HAP4	CR	TATA-containing
YLR275W	SMD2	TFIID	TATA-less
YGL020C	GET1	TFIID	TATA-less
YML105C	SEC65	TFIID	TATA-less
YOR030W	DFG16	TFIID	TATA-less
YKL049C	CSE4	TFIID	TATA-containing
YLR412W	BER1	TFIID	TATA-less
YLR301W	HRI1	TFIID	TATA-less
YLR305C	STT4	TFIID	TATA-less
YOR322C	LDB19	TFIID	TATA-less
YMR298W	LIP1	TFIID	TATA-less
YDR184C	ATC1	TFIID	TATA-less
YDL037C	BSC1	CR	TATA-less
YNL201C	PSY2	TFIID	TATA-containing
YHR107C	CDC12	TFIID	TATA-less
YGR251W	NOP19	TFIID	TATA-less
YDR141C	DOP1	TFIID	TATA-containing
YHR009C	TDA3	TFIID	TATA-less
YDL060W	TSR1	TFIID	TATA-less
YNL081C	SWS2	TFIID	TATA-less
YCL010C	SGF29	TFIID	TATA-containing
YMR272C	SCS7	CR	TATA-less
YER178W	PDA1	TFIID	TATA-less
YLR363C	NMD4	TFIID	TATA-less
YIR018W	YAP5	TFIID	TATA-less
YGL056C	SDS23	TFIID	TATA-less
YNL075W	IMP4	TFIID	TATA-containing
YDR120C	TRM1	TFIID	TATA-less
YGL171W	ROK1	TFIID	TATA-less
YDR373W	FRQ1	TFIID	TATA-less
YKL211C	TRP3	TFIID	TATA-less
YDL207W	GLE1	TFIID	TATA-containing
YLR401C	DUS3	TFIID	TATA-less
YLR321C	SFH1	TFIID	TATA-less
YLR038C	COX12	TFIID	TATA-less
YNR047W	FPK1	TFIID	TATA-less
YLR185W	RPL37A	TFIID	TATA-less
YDR232W	HEM1	TFIID	TATA-less
YOR075W	UFE1	TFIID	TATA-less
YMR314W	PRE5	TFIID	TATA-less
YBL103C	RTG3	TFIID	TATA-less
YDR464W	SPP41	TFIID	TATA-less
YNL301C	RPL18B	CR	TATA-less
YPR042C	PUF2	TFIID	TATA-less
YDR041W	RSM10	TFIID	TATA-less
YBR245C	ISW1	TFIID	TATA-less
YDR138W	HPR1	TFIID	TATA-less
YJL096W	MRPL49	TFIID	TATA-less
YIL062C	ARC15	TFIID	TATA-less
YDL135C	RDI1	TFIID	TATA-less
YIL084C	SDS3	TFIID	TATA-less
YNL161W	CBK1	TFIID	TATA-less
YDR458C	HEH2	TFIID	TATA-less
YML092C	PRE8	TFIID	TATA-containing
YHR013C	ARD1	TFIID	TATA-less
YGL148W	ARO2	TFIID	TATA-less
YGL055W	OLE1	CR	TATA-containing
YDR001C	NTH1	CR	TATA-less
YOR095C	RKI1	TFIID	TATA-less
YGR074W	SMD1	TFIID	TATA-containing
YJL129C	TRK1	TFIID	TATA-less
YHR090C	YNG2	TFIID	TATA-less
YHR152W	SPO12	TFIID	TATA-less
YGL039W	YGL039W	TFIID	TATA-less
YKL099C	UTP11	TFIID	TATA-less
YOL030W	GAS5	CR	TATA-containing
YIL031W	ULP2	TFIID	TATA-less
YBR058C-A	TSC3	TFIID	TATA-less
YPL189C-A	COA2	TFIID	TATA-containing
YPL211W	NIP7	TFIID	TATA-less
YLR114C	AVL9	TFIID	TATA-less
YHR123W	EPT1	TFIID	TATA-less
YOR272W	YTM1	TFIID	TATA-less
YPR025C	CCL1	TFIID	TATA-less
YBL033C	RIB1	CR	TATA-containing
YGR261C	APL6	TFIID	TATA-containing
YLR045C	STU2	TFIID	TATA-less
YDR161W	YDR161W	TFIID	TATA-less
YKR056W	TRM2	TFIID	TATA-less
YDR189W	SLY1	TFIID	TATA-containing
YBR151W	APD1	TFIID	TATA-containing
YNR074C	AIF1	CR	TATA-less
YKL167C	MRP49	TFIID	TATA-less
YIL129C	TAO3	TFIID	TATA-less
YDR454C	GUK1	TFIID	TATA-less
YDL027C	YDL027C	TFIID	TATA-containing
YBR166C	TYR1	TFIID	TATA-less
YGL200C	EMP24	TFIID	TATA-less
YOL158C	ENB1	CR	TATA-less
YDR297W	SUR2	TFIID	TATA-containing
YGL187C	COX4	TFIID	TATA-less
YDR301W	CFT1	TFIID	TATA-less
YGR084C	MRP13	TFIID	TATA-less
YHR197W	RIX1	TFIID	TATA-less
YNR053C	NOG2	TFIID	TATA-containing
YGR008C	STF2	CR	TATA-containing
YKR030W	GMH1	TFIID	TATA-containing
YLR254C	NDL1	TFIID	TATA-less
YDR017C	KCS1	TFIID	TATA-containing
YGL094C	PAN2	TFIID	TATA-less
YNL261W	ORC5	TFIID	TATA-containing
YBR281C	DUG2	TFIID	TATA-less
YLR166C	SEC10	TFIID	TATA-less
YEL056W	HAT2	TFIID	TATA-less
YJL165C	HAL5	TFIID	TATA-less
YOR109W	INP53	TFIID	TATA-less
YJL005W	CYR1	TFIID	TATA-less
YPL020C	ULP1	TFIID	TATA-less
YMR001C	CDC5	TFIID	TATA-less
YOR035C	SHE4	TFIID	TATA-containing
YCL045C	EMC1	TFIID	TATA-containing
YKL186C	MTR2	TFIID	TATA-containing
YPL070W	MUK1	TFIID	TATA-containing
YKR002W	PAP1	TFIID	TATA-less
YBR267W	REI1	TFIID	TATA-less
YBL078C	ATG8	TFIID	TATA-less
YER175C	TMT1	TFIID	TATA-containing
YNL027W	CRZ1	TFIID	TATA-containing
YKR018C	YKR018C	TFIID	TATA-less
YIL026C	IRR1	TFIID	TATA-less
YBL045C	COR1	TFIID	TATA-less
YOR160W	MTR10	TFIID	TATA-less
YJR050W	ISY1	TFIID	TATA-less
YJL197W	UBP12	TFIID	TATA-less
YGR208W	SER2	TFIID	TATA-less
YCL057W	PRD1	TFIID	TATA-less
YKL130C	SHE2	TFIID	TATA-less
YER100W	UBC6	TFIID	TATA-less
YER035W	EDC2	CR	TATA-containing
YGR038W	ORM1	TFIID	TATA-containing
YNL090W	RHO2	TFIID	TATA-less
YPR104C	FHL1	TFIID	TATA-less
YLR186W	EMG1	TFIID	TATA-less
YMR300C	ADE4	TFIID	TATA-less
YHR073W	OSH3	TFIID	TATA-less
YBR155W	CNS1	TFIID	TATA-less
YOL133W	HRT1	TFIID	TATA-less
YFL007W	BLM10	TFIID	TATA-less
YGL040C	HEM2	TFIID	TATA-containing
YPR020W	ATP20	TFIID	TATA-less
YOR091W	TMA46	TFIID	TATA-less
YOR108W	LEU9	TFIID	TATA-less
YBR212W	NGR1	TFIID	TATA-less
YOR217W	RFC1	TFIID	TATA-less
YER146W	LSM5	TFIID	TATA-less
YPL057C	SUR1	CR	TATA-containing
YAL059W	ECM1	TFIID	TATA-less
YOR132W	VPS17	TFIID	TATA-containing
YJR010C-A	SPC1	TFIID	TATA-containing
YDL056W	MBP1	TFIID	TATA-less
YGR252W	GCN5	TFIID	TATA-less
YPL242C	IQG1	TFIID	TATA-less
YJR011C	YJR011C	TFIID	TATA-less
YKL128C	PMU1	TFIID	TATA-less
YCR067C	SED4	TFIID	TATA-less
YLR429W	CRN1	TFIID	TATA-less
YJL033W	HCA4	TFIID	TATA-less
YFR051C	RET2	TFIID	TATA-less
YJL198W	PHO90	TFIID	TATA-less
YEL053C	MAK10	TFIID	TATA-less
YBL032W	HEK2	TFIID	TATA-containing
YLL001W	DNM1	TFIID	TATA-less
YIL125W	KGD1	TFIID	TATA-less
YIL090W	ICE2	TFIID	TATA-less
YKR072C	SIS2	TFIID	TATA-containing
YDR485C	VPS72	TFIID	TATA-less
YDR494W	RSM28	TFIID	TATA-less
YOR086C	TCB1	TFIID	TATA-less
YPR118W	MRI1	TFIID	TATA-less
YPR088C	SRP54	TFIID	TATA-less
YDR181C	SAS4	TFIID	TATA-less
YJR132W	NMD5	TFIID	TATA-containing
YAL017W	PSK1	TFIID	TATA-containing
YGL172W	NUP49	TFIID	TATA-containing
YPR069C	SPE3	CR	TATA-containing
YPL081W	RPS9A	TFIID	TATA-less
YMR261C	TPS3	TFIID	TATA-less
YLR414C	PUN1	CR	TATA-containing
YNL147W	LSM7	TFIID	TATA-less
YHL027W	RIM101	TFIID	TATA-containing
YER172C	BRR2	TFIID	TATA-less
YLR328W	NMA1	TFIID	TATA-less
YNL050C	YNL050C	TFIID	TATA-less
YNL051W	COG5	TFIID	TATA-containing
YNL288W	CAF40	TFIID	TATA-less
YNL182C	IPI3	TFIID	TATA-less
YPL234C	VMA11	TFIID	TATA-less
YOR273C	TPO4	CR	TATA-containing
YBL097W	BRN1	TFIID	TATA-containing
YNL238W	KEX2	TFIID	TATA-less
YDR098C	GRX3	TFIID	TATA-less
YLR096W	KIN2	TFIID	TATA-less
YOR119C	RIO1	TFIID	TATA-less
YNL199C	GCR2	TFIID	TATA-less
YJR062C	NTA1	TFIID	TATA-containing
YOR211C	MGM1	TFIID	TATA-less
YFR041C	ERJ5	TFIID	TATA-less
YFR031C	SMC2	TFIID	TATA-less
YKR064W	OAF3	TFIID	TATA-less
YOR171C	LCB4	TFIID	TATA-less
YIL047C	SYG1	TFIID	TATA-less
YPL266W	DIM1	TFIID	TATA-less
YEL036C	ANP1	TFIID	TATA-less
YMR071C	TVP18	TFIID	TATA-less
YKL008C	LAC1	CR	TATA-less
YIL147C	SLN1	TFIID	TATA-less
YLR095C	IOC2	TFIID	TATA-less
YPL163C	SVS1	CR	TATA-less
YLR367W	RPS22B	TFIID	TATA-less
YNL330C	RPD3	TFIID	TATA-less
YML071C	COG8	TFIID	TATA-less
YBR234C	ARC40	TFIID	TATA-less
YHR181W	SVP26	TFIID	TATA-less
YMR296C	LCB1	TFIID	TATA-less
YLR073C	RFU1	TFIID	TATA-less
YPR034W	ARP7	TFIID	TATA-less
YJL011C	RPC17	TFIID	TATA-less
YAR007C	RFA1	TFIID	TATA-less
YNL062C	GCD10	TFIID	TATA-less
YGL129C	RSM23	TFIID	TATA-containing
YGL111W	NSA1	TFIID	TATA-less
YLR278C	YLR278C	TFIID	TATA-less
YMR304W	UBP15	TFIID	TATA-less
YGR063C	SPT4	TFIID	TATA-containing
YDR216W	ADR1	TFIID	TATA-less
YGL178W	MPT5	TFIID	TATA-less
YHR165C	PRP8	TFIID	TATA-containing
YLR138W	NHA1	TFIID	TATA-containing
YOL032W	OPI10	TFIID	TATA-less
YMR117C	SPC24	TFIID	TATA-less
YBL040C	ERD2	TFIID	TATA-less
YER111C	SWI4	TFIID	TATA-less
YLR454W	FMP27	TFIID	TATA-less
YBR073W	RDH54	TFIID	TATA-containing
YHR118C	ORC6	TFIID	TATA-less
YLR120C	YPS1	TFIID	TATA-less
YOL013C	HRD1	TFIID	TATA-less
YMR061W	RNA14	TFIID	TATA-less
YHR146W	CRP1	TFIID	TATA-less
YBL107C	MIX23	TFIID	TATA-containing
YDR159W	SAC3	TFIID	TATA-less
YCR065W	HCM1	CR	TATA-less
YGR147C	NAT2	TFIID	TATA-less
YOR150W	MRPL23	TFIID	TATA-less
YGL041W-A	YGL041W-A	TFIID	TATA-less
YMR145C	NDE1	CR	TATA-containing
YML100W	TSL1	CR	TATA-containing
YCR069W	CPR4	TFIID	TATA-less
YPL116W	HOS3	TFIID	TATA-less
YKL010C	UFD4	TFIID	TATA-less
YBR015C	MNN2	TFIID	TATA-less
YCR107W	AAD3	TFIID	TATA-containing
YJR143C	PMT4	TFIID	TATA-less
YPR073C	LTP1	TFIID	TATA-less
YBL090W	MRP21	TFIID	TATA-less
YMR016C	SOK2	TFIID	TATA-less
YNL111C	CYB5	TFIID	TATA-containing
YGR081C	SLX9	TFIID	TATA-containing
YBR095C	RXT2	TFIID	TATA-less
YDR498C	SEC20	TFIID	TATA-less
YPR141C	KAR3	TFIID	TATA-less
YNR013C	PHO91	TFIID	TATA-less
YML125C	PGA3	TFIID	TATA-less
YGL049C	TIF4632	TFIID	TATA-less
YLR226W	BUR2	TFIID	TATA-less
YCL001W	RER1	TFIID	TATA-less
YPL203W	TPK2	TFIID	TATA-less
YHR200W	RPN10	TFIID	TATA-less
YDR481C	PHO8	TFIID	TATA-containing
YER029C	SMB1	TFIID	TATA-less
YGL125W	MET13	CR	TATA-containing
YDL236W	PHO13	TFIID	TATA-less
YCL017C	NFS1	TFIID	TATA-containing
YKR074W	AIM29	TFIID	TATA-less
YLR327C	TMA10	CR	TATA-less
YDL166C	FAP7	TFIID	TATA-containing
YBR023C	CHS3	TFIID	TATA-less
YHL038C	CBP2	TFIID	TATA-less
YLR373C	VID22	TFIID	TATA-less
YHR029C	YHI9	TFIID	TATA-less
YHL039W	EFM1	TFIID	TATA-less
YDR093W	DNF2	TFIID	TATA-less
YBL017C	PEP1	TFIID	TATA-less
YLR069C	MEF1	TFIID	TATA-containing
YHR056C	RSC30	TFIID	TATA-less
YNL207W	RIO2	TFIID	TATA-containing
YJR054W	KCH1	TFIID	TATA-less
YML110C	COQ5	TFIID	TATA-less
YGR136W	LSB1	CR	TATA-containing
YPR191W	QCR2	TFIID	TATA-containing
YGL073W	HSF1	TFIID	TATA-less
YPL188W	POS5	TFIID	TATA-less
YGR210C	YGR210C	TFIID	TATA-less
YHR063C	PAN5	TFIID	TATA-less
YML032C	RAD52	TFIID	TATA-less
YKR006C	MRPL13	TFIID	TATA-less
YDR012W	RPL4B	TFIID	TATA-less
YNR006W	VPS27	TFIID	TATA-less
YOR230W	WTM1	CR	TATA-less
YLR419W	YLR419W	TFIID	TATA-less
YCR043C	YCR043C	TFIID	TATA-containing
YJL072C	PSF2	TFIID	TATA-less
YIL151C	ESL1	TFIID	TATA-containing
YOL062C	APM4	TFIID	TATA-less
YML081W	TDA9	TFIID	TATA-less
YIL063C	YRB2	TFIID	TATA-containing
YDR524C	AGE1	TFIID	TATA-less
YKL023W	YKL023W	TFIID	TATA-less
YOR299W	BUD7	TFIID	TATA-less
YPR115W	RGC1	TFIID	TATA-less
YDR244W	PEX5	TFIID	TATA-containing
YIL008W	URM1	TFIID	TATA-less
YGL036W	YGL036W	TFIID	TATA-containing
YDR531W	CAB1	TFIID	TATA-less
YBL005W	PDR3	TFIID	TATA-less
YPR055W	SEC8	TFIID	TATA-less
[truncated: 2,901 more rows]

## Sheet: Msn24
gene_id	gene_name	class	Msn2/4
YPR036W-A	SPO24	CR	Msn2/4 binding site
YLR109W	AHP1	CR	Msn2/4 binding site
YHR179W	OYE2	CR	No Msn2/4 binding site
YGR209C	TRX2	CR	No Msn2/4 binding site
YOL151W	GRE2	CR	No Msn2/4 binding site
YGR192C	TDH3	CR	No Msn2/4 binding site
YOL109W	ZEO1	CR	No Msn2/4 binding site
YLR110C	CCW12	CR	No Msn2/4 binding site
YDL184C	RPL41A	TFIID	No Msn2/4 binding site
YDL133C-A	RPL41B	TFIID	No Msn2/4 binding site
YDR524C-B	YDR524C-B	CR	No Msn2/4 binding site
YGL008C	PMA1	CR	Msn2/4 binding site
YPL240C	HSP82	CR	No Msn2/4 binding site
YMR186W	HSC82	CR	No Msn2/4 binding site
YBR244W	GPX2	CR	No Msn2/4 binding site
YNL134C	YNL134C	CR	Msn2/4 binding site
YHR174W	ENO2	CR	No Msn2/4 binding site
YCR012W	PGK1	CR	Msn2/4 binding site
YGR142W	BTN2	CR	No Msn2/4 binding site
YML028W	TSA1	CR	No Msn2/4 binding site
YOR298C-A	MBF1	CR	Msn2/4 binding site
YLR075W	RPL10	CR	No Msn2/4 binding site
YLL024C	SSA2	CR	No Msn2/4 binding site
YKL152C	GPM1	CR	No Msn2/4 binding site
YML131W	YML131W	CR	No Msn2/4 binding site
YCR024C-A	PMP1	CR	No Msn2/4 binding site
YOR153W	PDR5	CR	No Msn2/4 binding site
YPL187W	MF(ALPHA)1	CR	No Msn2/4 binding site
YLR460C	YLR460C	CR	No Msn2/4 binding site
YDR353W	TRR1	CR	No Msn2/4 binding site
YGR055W	MUP1	CR	No Msn2/4 binding site
YJR104C	SOD1	CR	No Msn2/4 binding site
YDR011W	SNQ2	CR	Msn2/4 binding site
YNL031C	HHT2	CR	Msn2/4 binding site
YGR155W	CYS4	CR	No Msn2/4 binding site
YKL060C	FBA1	CR	No Msn2/4 binding site
YEL017C-A	PMP2	CR	No Msn2/4 binding site
YAL005C	SSA1	CR	Msn2/4 binding site
YPL061W	ALD6	CR	Msn2/4 binding site
YJR045C	SSC1	CR	Msn2/4 binding site
YAL038W	CDC19	CR	Msn2/4 binding site
YLL026W	HSP104	CR	Msn2/4 binding site
YNL030W	HHF2	CR	No Msn2/4 binding site
YBR008C	FLR1	CR	No Msn2/4 binding site
YLR249W	YEF3	CR	No Msn2/4 binding site
YDR050C	TPI1	CR	No Msn2/4 binding site
YOR369C	RPS12	TFIID	No Msn2/4 binding site
YGR234W	YHB1	CR	No Msn2/4 binding site
YER091C	MET6	CR	No Msn2/4 binding site
YJL034W	KAR2	CR	No Msn2/4 binding site
YLR355C	ILV5	CR	No Msn2/4 binding site
YCL026C-A	FRM2	CR	No Msn2/4 binding site
YIL053W	GPP1	CR	No Msn2/4 binding site
YDR224C	HTB1	CR	Msn2/4 binding site
YDR225W	HTA1	CR	Msn2/4 binding site
YLR044C	PDC1	CR	Msn2/4 binding site
YLR325C	RPL38	TFIID	No Msn2/4 binding site
YLR108C	YLR108C	CR	Msn2/4 binding site
YJR123W	RPS5	TFIID	Msn2/4 binding site
YNL178W	RPS3	TFIID	No Msn2/4 binding site
YLR167W	RPS31	TFIID	No Msn2/4 binding site
YNL007C	SIS1	CR	No Msn2/4 binding site
YBR009C	HHF1	CR	Msn2/4 binding site
YHL015W	RPS20	TFIID	Msn2/4 binding site
YBR101C	FES1	TFIID	No Msn2/4 binding site
YNL064C	YDJ1	TFIID	No Msn2/4 binding site
YOR020C	HSP10	TFIID	No Msn2/4 binding site
YDL081C	RPP1A	TFIID	No Msn2/4 binding site
YBL002W	HTB2	CR	No Msn2/4 binding site
YEL009C	GCN4	CR	No Msn2/4 binding site
YOR027W	STI1	CR	No Msn2/4 binding site
YHR055C	CUP1-2	CR	No Msn2/4 binding site
YDL124W	YDL124W	CR	Msn2/4 binding site
YDL055C	PSA1	CR	No Msn2/4 binding site
YEL034W	HYP2	CR	No Msn2/4 binding site
YBR010W	HHT1	CR	No Msn2/4 binding site
YPL106C	SSE1	TFIID	No Msn2/4 binding site
YEL071W	DLD3	CR	No Msn2/4 binding site
YAL003W	EFB1	CR	No Msn2/4 binding site
YMR058W	FET3	CR	No Msn2/4 binding site
YDR382W	RPP2B	TFIID	No Msn2/4 binding site
YCR005C	CIT2	CR	No Msn2/4 binding site
YEL046C	GLY1	CR	No Msn2/4 binding site
YLR441C	RPS1A	TFIID	No Msn2/4 binding site
YOL086C	ADH1	CR	Msn2/4 binding site
YMR318C	ADH6	CR	No Msn2/4 binding site
YPR149W	NCE102	CR	Msn2/4 binding site
YKL096W-A	CWP2	CR	No Msn2/4 binding site
YKL056C	TMA19	CR	No Msn2/4 binding site
YCR024C-B	YCR024C-B	CR	No Msn2/4 binding site
YGL253W	HXK2	CR	No Msn2/4 binding site
YLR259C	HSP60	TFIID	No Msn2/4 binding site
YPL131W	RPL5	TFIID	No Msn2/4 binding site
YBL003C	HTA2	CR	No Msn2/4 binding site
YOR063W	RPL3	CR	No Msn2/4 binding site
YDL020C	RPN4	CR	No Msn2/4 binding site
YNL231C	PDR16	CR	No Msn2/4 binding site
YHR162W	MPC2	CR	Msn2/4 binding site
YCL026C-B	HBN1	CR	No Msn2/4 binding site
YOL039W	RPP2A	TFIID	Msn2/4 binding site
YKL081W	TEF4	CR	No Msn2/4 binding site
YDL061C	RPS29B	TFIID	No Msn2/4 binding site
YJL101C	GSH1	CR	No Msn2/4 binding site
YJL190C	RPS22A	TFIID	No Msn2/4 binding site
YLR216C	CPR6	TFIID	No Msn2/4 binding site
YLR029C	RPL15A	TFIID	No Msn2/4 binding site
YKR071C	DRE2	CR	No Msn2/4 binding site
YOR302W	YOR302W	CR	Msn2/4 binding site
YDR502C	SAM2	CR	No Msn2/4 binding site
YDR033W	MRH1	CR	No Msn2/4 binding site
YPR065W	ROX1	CR	No Msn2/4 binding site
YLR340W	RPP0	TFIID	No Msn2/4 binding site
YLR264W	RPS28B	TFIID	No Msn2/4 binding site
YER131W	RPS26B	TFIID	No Msn2/4 binding site
YBL092W	RPL32	TFIID	Msn2/4 binding site
YJR009C	TDH2	CR	No Msn2/4 binding site
YDR135C	YCF1	CR	No Msn2/4 binding site
YPL250C	ICY2	CR	No Msn2/4 binding site
YML063W	RPS1B	TFIID	No Msn2/4 binding site
YCR102C	YCR102C	CR	No Msn2/4 binding site
YGL255W	ZRT1	CR	No Msn2/4 binding site
YAL012W	CYS3	CR	No Msn2/4 binding site
YBR196C	PGI1	CR	No Msn2/4 binding site
YGR027C	RPS25A	TFIID	No Msn2/4 binding site
YER043C	SAH1	CR	No Msn2/4 binding site
YMR251W-A	HOR7	CR	Msn2/4 binding site
YML116W	ATR1	CR	No Msn2/4 binding site
YJL159W	HSP150	CR	No Msn2/4 binding site
YGL123W	RPS2	TFIID	Msn2/4 binding site
YBR078W	ECM33	CR	No Msn2/4 binding site
YEL054C	RPL12A	TFIID	No Msn2/4 binding site
YGL189C	RPS26A	TFIID	No Msn2/4 binding site
YER177W	BMH1	CR	Msn2/4 binding site
YBR068C	BAP2	CR	No Msn2/4 binding site
YHR143W	DSE2	CR	Msn2/4 binding site
YHR071W	PCL5	CR	No Msn2/4 binding site
YHR018C	ARG4	CR	No Msn2/4 binding site
YOR052C	TMC1	CR	Msn2/4 binding site
YGR157W	CHO2	CR	No Msn2/4 binding site
YGR148C	RPL24B	TFIID	No Msn2/4 binding site
YOR167C	RPS28A	TFIID	No Msn2/4 binding site
YML130C	ERO1	CR	No Msn2/4 binding site
YDR258C	HSP78	TFIID	Msn2/4 binding site
YMR307W	GAS1	CR	No Msn2/4 binding site
YLR286C	CTS1	CR	Msn2/4 binding site
YHL033C	RPL8A	TFIID	No Msn2/4 binding site
YHR072W-A	NOP10	TFIID	No Msn2/4 binding site
YDR418W	RPL12B	TFIID	Msn2/4 binding site
YHR005C-A	TIM10	TFIID	No Msn2/4 binding site
YFL039C	ACT1	TFIID	No Msn2/4 binding site
YDR513W	GRX2	CR	Msn2/4 binding site
YDL192W	ARF1	TFIID	No Msn2/4 binding site
YER145C	FTR1	CR	No Msn2/4 binding site
YGL089C	MF(ALPHA)2	CR	No Msn2/4 binding site
YDR037W	KRS1	CR	No Msn2/4 binding site
YDR132C	YDR132C	CR	No Msn2/4 binding site
YDL147W	RPN5	TFIID	Msn2/4 binding site
YLR333C	RPS25B	TFIID	Msn2/4 binding site
YOR198C	BFR1	TFIID	No Msn2/4 binding site
YPR145W	ASN1	CR	No Msn2/4 binding site
YGR211W	ZPR1	TFIID	No Msn2/4 binding site
YER052C	HOM3	CR	No Msn2/4 binding site
YLR197W	NOP56	TFIID	No Msn2/4 binding site
YPR080W	TEF1	CR	Msn2/4 binding site
YKR042W	UTH1	CR	No Msn2/4 binding site
YML123C	PHO84	CR	No Msn2/4 binding site
YER124C	DSE1	CR	No Msn2/4 binding site
YBR118W	TEF2	CR	No Msn2/4 binding site
YOL040C	RPS15	TFIID	No Msn2/4 binding site
YLR293C	GSP1	TFIID	No Msn2/4 binding site
YEL027W	VMA3	TFIID	No Msn2/4 binding site
YLR304C	ACO1	CR	No Msn2/4 binding site
YGR282C	BGL2	TFIID	No Msn2/4 binding site
YDL229W	SSB1	TFIID	No Msn2/4 binding site
YKL216W	URA1	CR	No Msn2/4 binding site
YDR099W	BMH2	TFIID	No Msn2/4 binding site
YBR025C	OLA1	TFIID	No Msn2/4 binding site
YGR169C-A	LSO2	TFIID	Msn2/4 binding site
YKL068W-A	YKL068W-A	CR	No Msn2/4 binding site
YPL237W	SUI3	TFIID	No Msn2/4 binding site
YDR002W	YRB1	TFIID	Msn2/4 binding site
YDL182W	LYS20	CR	No Msn2/4 binding site
YGL031C	RPL24A	TFIID	No Msn2/4 binding site
YMR309C	NIP1	TFIID	No Msn2/4 binding site
YLL060C	GTT2	CR	No Msn2/4 binding site
YDR086C	SSS1	TFIID	No Msn2/4 binding site
YDR276C	PMP3	CR	Msn2/4 binding site
YDR533C	HSP31	CR	Msn2/4 binding site
YDR497C	ITR1	CR	No Msn2/4 binding site
YLL045C	RPL8B	TFIID	No Msn2/4 binding site
YLR214W	FRE1	CR	No Msn2/4 binding site
YDR155C	CPR1	CR	Msn2/4 binding site
YDR171W	HSP42	CR	Msn2/4 binding site
YLR150W	STM1	TFIID	Msn2/4 binding site
YOR007C	SGT2	TFIID	No Msn2/4 binding site
YDR363W-A	SEM1	TFIID	No Msn2/4 binding site
YDL232W	OST4	TFIID	No Msn2/4 binding site
YGL054C	ERV14	TFIID	No Msn2/4 binding site
YNL209W	SSB2	TFIID	No Msn2/4 binding site
YNL067W	RPL9B	TFIID	No Msn2/4 binding site
YOR136W	IDH2	CR	Msn2/4 binding site
YNL036W	NCE103	CR	Msn2/4 binding site
YJR007W	SUI2	TFIID	No Msn2/4 binding site
YPL037C	EGD1	TFIID	Msn2/4 binding site
YIL138C	TPM2	TFIID	No Msn2/4 binding site
YOL139C	CDC33	TFIID	No Msn2/4 binding site
YPR165W	RHO1	TFIID	Msn2/4 binding site
YBR143C	SUP45	TFIID	No Msn2/4 binding site
YDR345C	HXT3	CR	No Msn2/4 binding site
YPR035W	GLN1	CR	No Msn2/4 binding site
YNL281W	HCH1	TFIID	No Msn2/4 binding site
YER165W	PAB1	TFIID	No Msn2/4 binding site
YNL244C	SUI1	TFIID	No Msn2/4 binding site
YDL084W	SUB2	TFIID	No Msn2/4 binding site
YMR038C	CCS1	CR	No Msn2/4 binding site
YNL069C	RPL16B	TFIID	No Msn2/4 binding site
YBR082C	UBC4	TFIID	No Msn2/4 binding site
YBR079C	RPG1	TFIID	No Msn2/4 binding site
YOR226C	ISU2	CR	No Msn2/4 binding site
YLR043C	TRX1	TFIID	No Msn2/4 binding site
YPL091W	GLR1	CR	No Msn2/4 binding site
YOR383C	FIT3	CR	No Msn2/4 binding site
YMR260C	TIF11	TFIID	No Msn2/4 binding site
YGL135W	RPL1B	TFIID	No Msn2/4 binding site
YOR344C	TYE7	CR	No Msn2/4 binding site
YJR109C	CPA2	CR	No Msn2/4 binding site
YKL172W	EBP2	TFIID	No Msn2/4 binding site
YGR240C	PFK1	CR	No Msn2/4 binding site
YNL255C	GIS2	TFIID	No Msn2/4 binding site
YPR158W	CUR1	TFIID	No Msn2/4 binding site
YBR189W	RPS9B	TFIID	No Msn2/4 binding site
YPL225W	YPL225W	TFIID	Msn2/4 binding site
YNL327W	EGT2	CR	No Msn2/4 binding site
YGR085C	RPL11B	TFIID	No Msn2/4 binding site
YKL182W	FAS1	CR	No Msn2/4 binding site
YAL035W	FUN12	TFIID	No Msn2/4 binding site
YHR008C	SOD2	CR	Msn2/4 binding site
YER036C	ARB1	TFIID	Msn2/4 binding site
YLR346C	YLR346C	CR	No Msn2/4 binding site
YBR085C-A	YBR085C-A	CR	No Msn2/4 binding site
YLR300W	EXG1	CR	No Msn2/4 binding site
YER048W-A	ISD11	TFIID	No Msn2/4 binding site
YOR096W	RPS7A	TFIID	No Msn2/4 binding site
YMR116C	ASC1	TFIID	No Msn2/4 binding site
YOR210W	RPB10	TFIID	No Msn2/4 binding site
YPL231W	FAS2	CR	No Msn2/4 binding site
YDR194C	MSS116	TFIID	No Msn2/4 binding site
YKL043W	PHD1	CR	No Msn2/4 binding site
YDL168W	SFA1	CR	No Msn2/4 binding site
YML091C	RPM2	CR	No Msn2/4 binding site
YER021W	RPN3	TFIID	No Msn2/4 binding site
YNL079C	TPM1	TFIID	No Msn2/4 binding site
YGL028C	SCW11	CR	No Msn2/4 binding site
YCL050C	APA1	TFIID	No Msn2/4 binding site
YOR204W	DED1	CR	No Msn2/4 binding site
YPL135W	ISU1	CR	No Msn2/4 binding site
YNL131W	TOM22	TFIID	No Msn2/4 binding site
YML106W	URA5	TFIID	No Msn2/4 binding site
YHR193C	EGD2	TFIID	No Msn2/4 binding site
YOL127W	RPL25	TFIID	Msn2/4 binding site
YLR372W	ELO3	TFIID	No Msn2/4 binding site
YOR382W	FIT2	CR	Msn2/4 binding site
YGR118W	RPS23A	TFIID	Msn2/4 binding site
YKL164C	PIR1	CR	No Msn2/4 binding site
YLR048W	RPS0B	TFIID	No Msn2/4 binding site
YHR082C	KSP1	TFIID	No Msn2/4 binding site
YLR175W	CBF5	TFIID	No Msn2/4 binding site
YGR254W	ENO1	CR	No Msn2/4 binding site
YGR159C	NSR1	TFIID	No Msn2/4 binding site
YCR021C	HSP30	CR	No Msn2/4 binding site
YEL040W	UTR2	CR	No Msn2/4 binding site
YKL082C	RRP14	TFIID	No Msn2/4 binding site
YBR109C	CMD1	TFIID	No Msn2/4 binding site
YNL287W	SEC21	TFIID	Msn2/4 binding site
YML058W	SML1	CR	No Msn2/4 binding site
YDR071C	PAA1	TFIID	No Msn2/4 binding site
YER025W	GCD11	TFIID	No Msn2/4 binding site
YDL243C	AAD4	CR	No Msn2/4 binding site
YLR136C	TIS11	CR	No Msn2/4 binding site
YBR011C	IPP1	TFIID	No Msn2/4 binding site
YEL026W	SNU13	TFIID	No Msn2/4 binding site
YNL121C	TOM70	TFIID	No Msn2/4 binding site
YDL126C	CDC48	TFIID	Msn2/4 binding site
YPR132W	RPS23B	TFIID	No Msn2/4 binding site
YBR162C	TOS1	CR	No Msn2/4 binding site
YLR180W	SAM1	CR	No Msn2/4 binding site
YPR133W-A	TOM5	TFIID	No Msn2/4 binding site
YJL148W	RPA34	TFIID	No Msn2/4 binding site
YGR264C	MES1	TFIID	No Msn2/4 binding site
YJL124C	LSM1	TFIID	No Msn2/4 binding site
YBL076C	ILS1	TFIID	No Msn2/4 binding site
YLL028W	TPO1	CR	No Msn2/4 binding site
YER148W	SPT15	TFIID	Msn2/4 binding site
YHR143W-A	RPC10	TFIID	No Msn2/4 binding site
YIL078W	THS1	TFIID	No Msn2/4 binding site
YKL040C	NFU1	CR	No Msn2/4 binding site
YKL180W	RPL17A	TFIID	No Msn2/4 binding site
YGL058W	RAD6	TFIID	No Msn2/4 binding site
YJL111W	CCT7	TFIID	No Msn2/4 binding site
YGR086C	PIL1	CR	Msn2/4 binding site
YMR108W	ILV2	TFIID	No Msn2/4 binding site
YPR102C	RPL11A	TFIID	No Msn2/4 binding site
YDL014W	NOP1	TFIID	No Msn2/4 binding site
YHR027C	RPN1	TFIID	No Msn2/4 binding site
YOR312C	RPL20B	TFIID	No Msn2/4 binding site
YOR261C	RPN8	TFIID	No Msn2/4 binding site
YIL075C	RPN2	TFIID	No Msn2/4 binding site
YLR388W	RPS29A	TFIID	No Msn2/4 binding site
YLR342W	FKS1	CR	No Msn2/4 binding site
YPL145C	KES1	TFIID	No Msn2/4 binding site
YGL147C	RPL9A	TFIID	No Msn2/4 binding site
YDR427W	RPN9	TFIID	No Msn2/4 binding site
YCL031C	RRP7	TFIID	No Msn2/4 binding site
YMR205C	PFK2	CR	No Msn2/4 binding site
YOR276W	CAF20	TFIID	No Msn2/4 binding site
YNR051C	BRE5	TFIID	No Msn2/4 binding site
YDL185W	VMA1	TFIID	Msn2/4 binding site
YIL142W	CCT2	TFIID	Msn2/4 binding site
YFR033C	QCR6	CR	Msn2/4 binding site
YGL030W	RPL30	TFIID	No Msn2/4 binding site
YMR012W	CLU1	TFIID	No Msn2/4 binding site
YPR108W	RPN7	TFIID	No Msn2/4 binding site
YBR067C	TIP1	TFIID	No Msn2/4 binding site
YBR158W	AMN1	CR	No Msn2/4 binding site
YBL028C	YBL028C	TFIID	No Msn2/4 binding site
YDL208W	NHP2	TFIID	No Msn2/4 binding site
YER102W	RPS8B	TFIID	No Msn2/4 binding site
YKL156W	RPS27A	TFIID	No Msn2/4 binding site
YPL274W	SAM3	CR	Msn2/4 binding site
YNL180C	RHO5	CR	No Msn2/4 binding site
YOR122C	PFY1	TFIID	No Msn2/4 binding site
YPL004C	LSP1	CR	Msn2/4 binding site
YOR310C	NOP58	TFIID	No Msn2/4 binding site
YDL130W	RPP1B	TFIID	No Msn2/4 binding site
YMR122W-A	YMR122W-A	CR	Msn2/4 binding site
YOR303W	CPA1	CR	Msn2/4 binding site
YOR270C	VPH1	TFIID	No Msn2/4 binding site
YGL215W	CLG1	TFIID	Msn2/4 binding site
YGL105W	ARC1	TFIID	No Msn2/4 binding site
YLR421C	RPN13	TFIID	Msn2/4 binding site
YDR233C	RTN1	TFIID	Msn2/4 binding site
YDR054C	CDC34	TFIID	No Msn2/4 binding site
YPR074C	TKL1	TFIID	Msn2/4 binding site
YKL071W	YKL071W	CR	No Msn2/4 binding site
YDR023W	SES1	TFIID	No Msn2/4 binding site
YER064C	VHR2	CR	No Msn2/4 binding site
YKR076W	ECM4	CR	No Msn2/4 binding site
YML026C	RPS18B	TFIID	No Msn2/4 binding site
YCR093W	CDC39	TFIID	No Msn2/4 binding site
YHR007C	ERG11	CR	No Msn2/4 binding site
YLR390W-A	CCW14	CR	No Msn2/4 binding site
YPL226W	NEW1	TFIID	No Msn2/4 binding site
YJR094W-A	RPL43B	TFIID	No Msn2/4 binding site
YDL074C	BRE1	TFIID	No Msn2/4 binding site
YER026C	CHO1	CR	No Msn2/4 binding site
YPL239W	YAR1	TFIID	No Msn2/4 binding site
YLR354C	TAL1	CR	Msn2/4 binding site
YDL137W	ARF2	TFIID	No Msn2/4 binding site
YJR121W	ATP2	CR	Msn2/4 binding site
YDR487C	RIB3	CR	Msn2/4 binding site
YDL082W	RPL13A	TFIID	No Msn2/4 binding site
YML126C	ERG13	TFIID	No Msn2/4 binding site
YDR046C	BAP3	CR	No Msn2/4 binding site
YPL154C	PEP4	CR	Msn2/4 binding site
YPR041W	TIF5	TFIID	No Msn2/4 binding site
YOR293W	RPS10A	TFIID	Msn2/4 binding site
YDR060W	MAK21	TFIID	No Msn2/4 binding site
YGR162W	TIF4631	TFIID	No Msn2/4 binding site
YPL160W	CDC60	TFIID	No Msn2/4 binding site
YDR003W-A	YDR003W-A	TFIID	No Msn2/4 binding site
YMR142C	RPL13B	TFIID	No Msn2/4 binding site
YDR064W	RPS13	TFIID	No Msn2/4 binding site
YOR151C	RPB2	TFIID	No Msn2/4 binding site
YPL093W	NOG1	TFIID	No Msn2/4 binding site
YKL009W	MRT4	TFIID	Msn2/4 binding site
YMR177W	MMT1	CR	No Msn2/4 binding site
YGR037C	ACB1	TFIID	No Msn2/4 binding site
YCL037C	SRO9	TFIID	No Msn2/4 binding site
YLR009W	RLP24	TFIID	No Msn2/4 binding site
YGR285C	ZUO1	TFIID	No Msn2/4 binding site
YKL122C	SRP21	TFIID	No Msn2/4 binding site
YOR341W	RPA190	TFIID	No Msn2/4 binding site
YOL058W	ARG1	CR	No Msn2/4 binding site
YFR032C-A	RPL29	TFIID	No Msn2/4 binding site
YCR031C	RPS14A	TFIID	No Msn2/4 binding site
YIL069C	RPS24B	TFIID	No Msn2/4 binding site
YNL016W	PUB1	TFIID	No Msn2/4 binding site
YDR172W	SUP35	TFIID	No Msn2/4 binding site
YKL196C	YKT6	TFIID	No Msn2/4 binding site
YNL154C	YCK2	TFIID	No Msn2/4 binding site
YMR242C	RPL20A	TFIID	Msn2/4 binding site
YJR088C	EMC2	TFIID	No Msn2/4 binding site
YKL001C	MET14	TFIID	No Msn2/4 binding site
YGR253C	PUP2	TFIID	No Msn2/4 binding site
YOR254C	SEC63	TFIID	No Msn2/4 binding site
YBR106W	PHO88	TFIID	No Msn2/4 binding site
YDL097C	RPN6	TFIID	No Msn2/4 binding site
YLR040C	AFB1	CR	No Msn2/4 binding site
YBR283C	SSH1	TFIID	Msn2/4 binding site
YGR218W	CRM1	TFIID	No Msn2/4 binding site
YNL260C	LTO1	CR	No Msn2/4 binding site
YMR072W	ABF2	TFIID	No Msn2/4 binding site
YKL013C	ARC19	TFIID	Msn2/4 binding site
YGL206C	CHC1	TFIID	Msn2/4 binding site
YOR232W	MGE1	TFIID	No Msn2/4 binding site
YBL027W	RPL19B	TFIID	No Msn2/4 binding site
YPL243W	SRP68	TFIID	No Msn2/4 binding site
YER055C	HIS1	CR	No Msn2/4 binding site
YKR094C	RPL40B	TFIID	No Msn2/4 binding site
YER072W	VTC1	CR	No Msn2/4 binding site
YMR039C	SUB1	TFIID	No Msn2/4 binding site
YNR016C	ACC1	CR	Msn2/4 binding site
YDL070W	BDF2	CR	No Msn2/4 binding site
YOR206W	NOC2	TFIID	No Msn2/4 binding site
YBR127C	VMA2	TFIID	No Msn2/4 binding site
YFR004W	RPN11	TFIID	Msn2/4 binding site
YGL037C	PNC1	CR	Msn2/4 binding site
YLR347C	KAP95	TFIID	No Msn2/4 binding site
YJL127C-B	YJL127C-B	TFIID	No Msn2/4 binding site
YFL045C	SEC53	TFIID	No Msn2/4 binding site
YPR110C	RPC40	TFIID	No Msn2/4 binding site
YDL160C	DHH1	TFIID	No Msn2/4 binding site
YIL133C	RPL16A	TFIID	No Msn2/4 binding site
YML073C	RPL6A	TFIID	No Msn2/4 binding site
YER122C	GLO3	TFIID	Msn2/4 binding site
YDR496C	PUF6	TFIID	No Msn2/4 binding site
YNL087W	TCB2	CR	No Msn2/4 binding site
YLR060W	FRS1	TFIID	No Msn2/4 binding site
YKL039W	PTM1	CR	No Msn2/4 binding site
YHR052W	CIC1	TFIID	No Msn2/4 binding site
YCR053W	THR4	TFIID	No Msn2/4 binding site
YMR002W	MIX17	CR	No Msn2/4 binding site
YER070W	RNR1	CR	No Msn2/4 binding site
YPL220W	RPL1A	TFIID	No Msn2/4 binding site
YGL207W	SPT16	TFIID	No Msn2/4 binding site
YER073W	ALD5	CR	No Msn2/4 binding site
YOR335C	ALA1	TFIID	No Msn2/4 binding site
YFL031W	HAC1	CR	No Msn2/4 binding site
YCR009C	RVS161	TFIID	Msn2/4 binding site
YLL050C	COF1	TFIID	Msn2/4 binding site
YBL056W	PTC3	TFIID	No Msn2/4 binding site
YNL190W	YNL190W	CR	No Msn2/4 binding site
YNL229C	URE2	TFIID	No Msn2/4 binding site
YPR187W	RPO26	TFIID	No Msn2/4 binding site
YLR448W	RPL6B	TFIID	Msn2/4 binding site
YIL051C	MMF1	CR	Msn2/4 binding site
YJR105W	ADO1	TFIID	No Msn2/4 binding site
YER133W	GLC7	TFIID	Msn2/4 binding site
YGL103W	RPL28	TFIID	No Msn2/4 binding site
YNL308C	KRI1	TFIID	No Msn2/4 binding site
YLR061W	RPL22A	TFIID	No Msn2/4 binding site
YNL153C	GIM3	TFIID	No Msn2/4 binding site
YMR308C	PSE1	TFIID	No Msn2/4 binding site
YPL210C	SRP72	TFIID	No Msn2/4 binding site
YDR429C	TIF35	TFIID	Msn2/4 binding site
YDR447C	RPS17B	TFIID	No Msn2/4 binding site
YOR361C	PRT1	TFIID	No Msn2/4 binding site
YNL110C	NOP15	TFIID	No Msn2/4 binding site
YDR341C	YDR341C	TFIID	No Msn2/4 binding site
YGR279C	SCW4	CR	No Msn2/4 binding site
YKL117W	SBA1	TFIID	Msn2/4 binding site
YHR064C	SSZ1	TFIID	No Msn2/4 binding site
YOR355W	GDS1	TFIID	Msn2/4 binding site
YBR121C	GRS1	TFIID	No Msn2/4 binding site
YNL189W	SRP1	TFIID	No Msn2/4 binding site
YDR368W	YPR1	TFIID	No Msn2/4 binding site
YNL241C	ZWF1	CR	Msn2/4 binding site
YOL121C	RPS19A	TFIID	No Msn2/4 binding site
YKL103C	APE1	CR	Msn2/4 binding site
YLR287C-A	RPS30A	CR	No Msn2/4 binding site
YNL096C	RPS7B	TFIID	Msn2/4 binding site
YHL034C	SBP1	TFIID	Msn2/4 binding site
YLR455W	PDP3	TFIID	No Msn2/4 binding site
YNL070W	TOM7	TFIID	No Msn2/4 binding site
YIL148W	RPL40A	TFIID	No Msn2/4 binding site
YER009W	NTF2	TFIID	No Msn2/4 binding site
YJR122W	IBA57	TFIID	No Msn2/4 binding site
YHR183W	GND1	CR	No Msn2/4 binding site
YNL104C	LEU4	CR	No Msn2/4 binding site
YGR094W	VAS1	TFIID	No Msn2/4 binding site
YDR158W	HOM2	CR	No Msn2/4 binding site
YPL260W	YPL260W	TFIID	Msn2/4 binding site
YAL025C	MAK16	TFIID	No Msn2/4 binding site
YDR238C	SEC26	TFIID	No Msn2/4 binding site
YPR024W	YME1	TFIID	No Msn2/4 binding site
YPR181C	SEC23	TFIID	No Msn2/4 binding site
YNL118C	DCP2	TFIID	No Msn2/4 binding site
YKR008W	RSC4	TFIID	Msn2/4 binding site
YER090W	TRP2	TFIID	Msn2/4 binding site
YOR117W	RPT5	TFIID	No Msn2/4 binding site
YGR034W	RPL26B	TFIID	No Msn2/4 binding site
YNL212W	VID27	TFIID	No Msn2/4 binding site
YMR229C	RRP5	TFIID	No Msn2/4 binding site
YAL016W	TPD3	TFIID	No Msn2/4 binding site
YMR161W	HLJ1	TFIID	Msn2/4 binding site
YFR052W	RPN12	TFIID	No Msn2/4 binding site
YNL066W	SUN4	CR	No Msn2/4 binding site
YFL016C	MDJ1	TFIID	Msn2/4 binding site
YNL113W	RPC19	TFIID	No Msn2/4 binding site
YOR168W	GLN4	TFIID	No Msn2/4 binding site
YPL204W	HRR25	TFIID	No Msn2/4 binding site
YGL190C	CDC55	TFIID	No Msn2/4 binding site
YOR370C	MRS6	TFIID	No Msn2/4 binding site
YDR151C	CTH1	TFIID	No Msn2/4 binding site
YKR057W	RPS21A	TFIID	No Msn2/4 binding site
YER087C-B	SBH1	TFIID	No Msn2/4 binding site
YDR035W	ARO3	TFIID	No Msn2/4 binding site
YOR267C	HRK1	TFIID	No Msn2/4 binding site
YLR413W	INA1	CR	No Msn2/4 binding site
YBL072C	RPS8A	TFIID	No Msn2/4 binding site
YEL065W	SIT1	CR	No Msn2/4 binding site
YBR154C	RPB5	TFIID	No Msn2/4 binding site
YGR116W	SPT6	TFIID	Msn2/4 binding site
YOL136C	PFK27	CR	No Msn2/4 binding site
YPL078C	ATP4	TFIID	No Msn2/4 binding site
YJL109C	UTP10	TFIID	No Msn2/4 binding site
YMR235C	RNA1	TFIID	No Msn2/4 binding site
YDR091C	RLI1	TFIID	No Msn2/4 binding site
YBL099W	ATP1	TFIID	Msn2/4 binding site
YPR036W	VMA13	TFIID	Msn2/4 binding site
YOL154W	ZPS1	CR	No Msn2/4 binding site
YLR051C	FCF2	TFIID	Msn2/4 binding site
YNL002C	RLP7	TFIID	No Msn2/4 binding site
YKR095W	MLP1	TFIID	No Msn2/4 binding site
YBR034C	HMT1	TFIID	No Msn2/4 binding site
YDL140C	RPO21	TFIID	No Msn2/4 binding site
YDR394W	RPT3	TFIID	No Msn2/4 binding site
YPL117C	IDI1	TFIID	No Msn2/4 binding site
YGR135W	PRE9	TFIID	No Msn2/4 binding site
YNL085W	MKT1	TFIID	Msn2/4 binding site
YLR064W	PER33	CR	No Msn2/4 binding site
YML012W	ERV25	TFIID	No Msn2/4 binding site
YBL041W	PRE7	TFIID	No Msn2/4 binding site
YKL210W	UBA1	TFIID	No Msn2/4 binding site
YGL011C	SCL1	TFIID	No Msn2/4 binding site
YDR471W	RPL27B	TFIID	No Msn2/4 binding site
YGR124W	ASN2	TFIID	No Msn2/4 binding site
YOR332W	VMA4	TFIID	Msn2/4 binding site
YER002W	NOP16	TFIID	No Msn2/4 binding site
YJL189W	RPL39	TFIID	No Msn2/4 binding site
YKL178C	STE3	CR	No Msn2/4 binding site
YFL004W	VTC2	CR	No Msn2/4 binding site
YDL145C	COP1	TFIID	No Msn2/4 binding site
YGL195W	GCN1	TFIID	No Msn2/4 binding site
YJL052W	TDH1	CR	Msn2/4 binding site
YMR143W	RPS16A	TFIID	No Msn2/4 binding site
YML007W	YAP1	CR	No Msn2/4 binding site
YDR077W	SED1	CR	No Msn2/4 binding site
YMR079W	SEC14	TFIID	Msn2/4 binding site
YDR270W	CCC2	CR	No Msn2/4 binding site
YJR063W	RPA12	TFIID	No Msn2/4 binding site
YDR214W	AHA1	CR	No Msn2/4 binding site
YPR103W	PRE2	TFIID	No Msn2/4 binding site
YDR365C	ESF1	TFIID	No Msn2/4 binding site
YCL043C	PDI1	CR	No Msn2/4 binding site
YOL120C	RPL18A	TFIID	No Msn2/4 binding site
YGL173C	XRN1	TFIID	No Msn2/4 binding site
YGL122C	NAB2	TFIID	No Msn2/4 binding site
YDL235C	YPD1	TFIID	No Msn2/4 binding site
YDL075W	RPL31A	TFIID	No Msn2/4 binding site
YLR276C	DBP9	TFIID	No Msn2/4 binding site
YER012W	PRE1	TFIID	No Msn2/4 binding site
YPL212C	PUS1	TFIID	No Msn2/4 binding site
YKL184W	SPE1	TFIID	No Msn2/4 binding site
YMR230W	RPS10B	TFIID	No Msn2/4 binding site
YDL029W	ARP2	CR	No Msn2/4 binding site
YLR447C	VMA6	TFIID	No Msn2/4 binding site
YNL024C-A	KSH1	TFIID	No Msn2/4 binding site
YJR117W	STE24	TFIID	No Msn2/4 binding site
YPL249C-A	RPL36B	TFIID	No Msn2/4 binding site
YKL057C	NUP120	TFIID	No Msn2/4 binding site
YLR257W	YLR257W	TFIID	Msn2/4 binding site
YOR039W	CKB2	TFIID	No Msn2/4 binding site
YDR346C	SVF1	TFIID	No Msn2/4 binding site
YPL043W	NOP4	TFIID	No Msn2/4 binding site
YOR360C	PDE2	TFIID	Msn2/4 binding site
YGL029W	CGR1	TFIID	No Msn2/4 binding site
YFR040W	SAP155	TFIID	No Msn2/4 binding site
YNL248C	RPA49	TFIID	No Msn2/4 binding site
YDL007W	RPT2	TFIID	No Msn2/4 binding site
YML024W	RPS17A	TFIID	No Msn2/4 binding site
YOL027C	MDM38	TFIID	No Msn2/4 binding site
YBL024W	NCL1	TFIID	No Msn2/4 binding site
YER103W	SSA4	TFIID	Msn2/4 binding site
YIL126W	STH1	TFIID	No Msn2/4 binding site
YPL050C	MNN9	TFIID	No Msn2/4 binding site
YOR259C	RPT4	TFIID	No Msn2/4 binding site
YDR174W	HMO1	TFIID	No Msn2/4 binding site
YMR188C	MRPS17	TFIID	No Msn2/4 binding site
YOL145C	CTR9	TFIID	No Msn2/4 binding site
YDR299W	BFR2	TFIID	No Msn2/4 binding site
YGR020C	VMA7	TFIID	Msn2/4 binding site
YPR072W	NOT5	TFIID	No Msn2/4 binding site
YDR212W	TCP1	TFIID	No Msn2/4 binding site
YKL054C	DEF1	CR	No Msn2/4 binding site
YLR292C	SEC72	TFIID	No Msn2/4 binding site
YPL179W	PPQ1	TFIID	No Msn2/4 binding site
YMR217W	GUA1	TFIID	No Msn2/4 binding site
YIL035C	CKA1	TFIID	No Msn2/4 binding site
YDR381W	YRA1	CR	Msn2/4 binding site
YHR128W	FUR1	CR	No Msn2/4 binding site
YMR146C	TIF34	TFIID	No Msn2/4 binding site
YPL190C	NAB3	TFIID	No Msn2/4 binding site
YJL014W	CCT3	TFIID	No Msn2/4 binding site
YKR052C	MRS4	CR	No Msn2/4 binding site
YML103C	NUP188	TFIID	No Msn2/4 binding site
YPR143W	RRP15	TFIID	No Msn2/4 binding site
YMR246W	FAA4	CR	No Msn2/4 binding site
YNL197C	WHI3	TFIID	No Msn2/4 binding site
YKL035W	UGP1	CR	Msn2/4 binding site
YPL202C	AFT2	CR	No Msn2/4 binding site
YOR089C	VPS21	TFIID	No Msn2/4 binding site
YOL077C	BRX1	TFIID	No Msn2/4 binding site
YBR286W	APE3	CR	Msn2/4 binding site
YJL130C	URA2	CR	No Msn2/4 binding site
YGR103W	NOP7	TFIID	No Msn2/4 binding site
YER126C	NSA2	TFIID	No Msn2/4 binding site
YDR450W	RPS18A	TFIID	Msn2/4 binding site
YMR183C	SSO2	TFIID	No Msn2/4 binding site
YKR014C	YPT52	TFIID	Msn2/4 binding site
YHR196W	UTP9	TFIID	No Msn2/4 binding site
YGR229C	SMI1	TFIID	Msn2/4 binding site
YOL049W	GSH2	TFIID	No Msn2/4 binding site
YML074C	FPR3	TFIID	No Msn2/4 binding site
YIL118W	RHO3	TFIID	Msn2/4 binding site
YMR131C	RRB1	TFIID	No Msn2/4 binding site
YNL061W	NOP2	TFIID	No Msn2/4 binding site
YBR177C	EHT1	CR	No Msn2/4 binding site
YJL002C	OST1	TFIID	No Msn2/4 binding site
YDR377W	ATP17	TFIID	No Msn2/4 binding site
YFL037W	TUB2	TFIID	No Msn2/4 binding site
YPL171C	OYE3	CR	No Msn2/4 binding site
YGL238W	CSE1	TFIID	No Msn2/4 binding site
YPL178W	CBC2	TFIID	No Msn2/4 binding site
YDL148C	NOP14	TFIID	Msn2/4 binding site
YIL038C	NOT3	TFIID	No Msn2/4 binding site
YJL008C	CCT8	TFIID	No Msn2/4 binding site
YOR043W	WHI2	TFIID	No Msn2/4 binding site
YHR094C	HXT1	CR	Msn2/4 binding site
YGR185C	TYS1	TFIID	No Msn2/4 binding site
YDR190C	RVB1	TFIID	Msn2/4 binding site
YML022W	APT1	TFIID	No Msn2/4 binding site
YJL177W	RPL17B	TFIID	No Msn2/4 binding site
YHR141C	RPL42B	TFIID	Msn2/4 binding site
YBR084C-A	RPL19A	TFIID	Msn2/4 binding site
YBL022C	PIM1	TFIID	No Msn2/4 binding site
YDR508C	GNP1	CR	No Msn2/4 binding site
YGR017W	YGR017W	TFIID	No Msn2/4 binding site
YFR010W	UBP6	TFIID	No Msn2/4 binding site
YDR264C	AKR1	TFIID	No Msn2/4 binding site
YFL038C	YPT1	TFIID	No Msn2/4 binding site
YGL077C	HNM1	CR	No Msn2/4 binding site
YHL011C	PRS3	TFIID	No Msn2/4 binding site
YPL273W	SAM4	TFIID	No Msn2/4 binding site
YKL063C	YKL063C	TFIID	No Msn2/4 binding site
YBR130C	SHE3	TFIID	No Msn2/4 binding site
YGR132C	PHB1	TFIID	No Msn2/4 binding site
YHR170W	NMD3	TFIID	No Msn2/4 binding site
YBR049C	REB1	TFIID	No Msn2/4 binding site
YDR395W	SXM1	TFIID	No Msn2/4 binding site
YGR090W	UTP22	TFIID	No Msn2/4 binding site
YOR078W	BUD21	TFIID	No Msn2/4 binding site
YER136W	GDI1	TFIID	Msn2/4 binding site
YDL180W	YDL180W	CR	No Msn2/4 binding site
YPR169W	JIP5	TFIID	No Msn2/4 binding site
YLR033W	RSC58	TFIID	No Msn2/4 binding site
YPR043W	RPL43A	TFIID	No Msn2/4 binding site
YOL041C	NOP12	TFIID	No Msn2/4 binding site
YIL018W	RPL2B	TFIID	No Msn2/4 binding site
YMR194W	RPL36A	TFIID	No Msn2/4 binding site
YKR028W	SAP190	TFIID	No Msn2/4 binding site
YDR032C	PST2	CR	Msn2/4 binding site
YPL118W	MRP51	TFIID	Msn2/4 binding site
YDL083C	RPS16B	TFIID	No Msn2/4 binding site
YBR146W	MRPS9	TFIID	No Msn2/4 binding site
YKL028W	TFA1	TFIID	No Msn2/4 binding site
YDR028C	REG1	TFIID	No Msn2/4 binding site
YKL006W	RPL14A	TFIID	No Msn2/4 binding site
YKL179C	COY1	TFIID	No Msn2/4 binding site
YGR054W	YGR054W	TFIID	No Msn2/4 binding site
YJL080C	SCP160	TFIID	No Msn2/4 binding site
YOR290C	SNF2	TFIID	No Msn2/4 binding site
YER056C	FCY2	CR	No Msn2/4 binding site
YPL079W	RPL21B	TFIID	No Msn2/4 binding site
YPL265W	DIP5	CR	No Msn2/4 binding site
YDL025C	RTK1	CR	Msn2/4 binding site
YGL009C	LEU1	TFIID	No Msn2/4 binding site
YHR135C	YCK1	TFIID	No Msn2/4 binding site
YER074W	RPS24A	TFIID	No Msn2/4 binding site
YKR081C	RPF2	TFIID	No Msn2/4 binding site
YGR106C	VOA1	TFIID	No Msn2/4 binding site
YGL245W	GUS1	TFIID	No Msn2/4 binding site
YGR161C	RTS3	CR	No Msn2/4 binding site
YDL125C	HNT1	CR	No Msn2/4 binding site
YDL122W	UBP1	TFIID	No Msn2/4 binding site
YJL136C	RPS21B	TFIID	No Msn2/4 binding site
YKR011C	YKR011C	TFIID	No Msn2/4 binding site
YDL053C	PBP4	TFIID	No Msn2/4 binding site
YCL054W	SPB1	TFIID	No Msn2/4 binding site
YCL011C	GBP2	TFIID	No Msn2/4 binding site
YDR127W	ARO1	CR	No Msn2/4 binding site
YIL149C	MLP2	TFIID	No Msn2/4 binding site
YFR002W	NIC96	TFIID	No Msn2/4 binding site
YJL133C-A	YJL133C-A	CR	Msn2/4 binding site
YPL012W	RRP12	TFIID	Msn2/4 binding site
YGR146C	ECL1	CR	No Msn2/4 binding site
YPL215W	CBP3	TFIID	No Msn2/4 binding site
YML009C	MRPL39	TFIID	No Msn2/4 binding site
YGR128C	UTP8	TFIID	Msn2/4 binding site
YOL068C	HST1	TFIID	No Msn2/4 binding site
YPR016C	TIF6	TFIID	No Msn2/4 binding site
YGR231C	PHB2	TFIID	No Msn2/4 binding site
YER123W	YCK3	TFIID	No Msn2/4 binding site
YDR226W	ADK1	CR	No Msn2/4 binding site
YPR010C	RPA135	TFIID	No Msn2/4 binding site
YGR130C	YGR130C	TFIID	Msn2/4 binding site
YEL051W	VMA8	TFIID	No Msn2/4 binding site
YCR004C	YCP4	TFIID	Msn2/4 binding site
YMR295C	YMR295C	TFIID	No Msn2/4 binding site
YNL044W	YIP3	TFIID	No Msn2/4 binding site
YML093W	UTP14	TFIID	No Msn2/4 binding site
YDR152W	GIR2	TFIID	No Msn2/4 binding site
YDR153C	ENT5	TFIID	Msn2/4 binding site
YLR297W	YLR297W	CR	No Msn2/4 binding site
YPL146C	NOP53	TFIID	No Msn2/4 binding site
YNL005C	MRP7	TFIID	No Msn2/4 binding site
YPL105C	SYH1	TFIID	No Msn2/4 binding site
YNR021W	YNR021W	TFIID	No Msn2/4 binding site
YPL019C	VTC3	CR	No Msn2/4 binding site
YJR014W	TMA22	TFIID	No Msn2/4 binding site
YHR005C	GPA1	TFIID	No Msn2/4 binding site
YBR162W-A	YSY6	TFIID	No Msn2/4 binding site
YML056C	IMD4	TFIID	Msn2/4 binding site
YKL145W	RPT1	TFIID	No Msn2/4 binding site
YHR203C	RPS4B	TFIID	No Msn2/4 binding site
YGL244W	RTF1	TFIID	No Msn2/4 binding site
YDL116W	NUP84	TFIID	No Msn2/4 binding site
YDL143W	CCT4	TFIID	No Msn2/4 binding site
YMR203W	TOM40	TFIID	No Msn2/4 binding site
YLR310C	CDC25	TFIID	No Msn2/4 binding site
YOR008C	SLG1	TFIID	Msn2/4 binding site
YKL120W	OAC1	CR	No Msn2/4 binding site
YDR335W	MSN5	TFIID	Msn2/4 binding site
YHR077C	NMD2	TFIID	No Msn2/4 binding site
YGR267C	FOL2	TFIID	Msn2/4 binding site
YEL033W	MTC7	CR	No Msn2/4 binding site
YPR067W	ISA2	TFIID	No Msn2/4 binding site
YBR086C	IST2	TFIID	No Msn2/4 binding site
YGR175C	ERG1	CR	No Msn2/4 binding site
YGL043W	DST1	TFIID	No Msn2/4 binding site
YGL078C	DBP3	TFIID	No Msn2/4 binding site
YJL168C	SET2	TFIID	No Msn2/4 binding site
YMR037C	MSN2	CR	Msn2/4 binding site
YLR221C	RSA3	TFIID	No Msn2/4 binding site
YML038C	YMD8	TFIID	No Msn2/4 binding site
YOR224C	RPB8	TFIID	No Msn2/4 binding site
YNL091W	NST1	TFIID	No Msn2/4 binding site
YGR167W	CLC1	TFIID	Msn2/4 binding site
YGL188C-A	YGL188C-A	TFIID	No Msn2/4 binding site
YFR050C	PRE4	TFIID	No Msn2/4 binding site
YKL104C	GFA1	TFIID	No Msn2/4 binding site
YDR062W	LCB2	TFIID	No Msn2/4 binding site
YOR247W	SRL1	CR	No Msn2/4 binding site
YML081C-A	ATP18	TFIID	No Msn2/4 binding site
YCR033W	SNT1	TFIID	No Msn2/4 binding site
YJL012C	VTC4	CR	No Msn2/4 binding site
YKL080W	VMA5	TFIID	No Msn2/4 binding site
YOR326W	MYO2	TFIID	No Msn2/4 binding site
YCR082W	AHC2	TFIID	No Msn2/4 binding site
YLR432W	IMD3	CR	No Msn2/4 binding site
YMR173W	DDR48	CR	Msn2/4 binding site
YBR029C	CDS1	TFIID	No Msn2/4 binding site
YPL090C	RPS6A	TFIID	No Msn2/4 binding site
YBR199W	KTR4	TFIID	Msn2/4 binding site
YER006W	NUG1	TFIID	No Msn2/4 binding site
YDL067C	COX9	TFIID	No Msn2/4 binding site
YDR280W	RRP45	TFIID	Msn2/4 binding site
YHR190W	ERG9	CR	No Msn2/4 binding site
YBL030C	PET9	CR	No Msn2/4 binding site
YOR209C	NPT1	TFIID	No Msn2/4 binding site
YMR015C	ERG5	CR	No Msn2/4 binding site
YLL029W	FRA1	TFIID	No Msn2/4 binding site
YPR137W	RRP9	TFIID	No Msn2/4 binding site
YGL228W	SHE10	TFIID	No Msn2/4 binding site
YDR293C	SSD1	TFIID	No Msn2/4 binding site
YGL048C	RPT6	TFIID	No Msn2/4 binding site
YLR262C-A	TMA7	TFIID	No Msn2/4 binding site
YEL031W	SPF1	TFIID	No Msn2/4 binding site
YNL098C	RAS2	TFIID	Msn2/4 binding site
YGR204W	ADE3	CR	No Msn2/4 binding site
YEL013W	VAC8	TFIID	No Msn2/4 binding site
YER030W	CHZ1	TFIID	Msn2/4 binding site
YFL005W	SEC4	TFIID	No Msn2/4 binding site
YOL029C	YOL029C	TFIID	No Msn2/4 binding site
YNL157W	IGO1	TFIID	Msn2/4 binding site
YCL064C	CHA1	CR	No Msn2/4 binding site
YMR125W	STO1	TFIID	No Msn2/4 binding site
YJL061W	NUP82	TFIID	No Msn2/4 binding site
YOR046C	DBP5	TFIID	No Msn2/4 binding site
YJL138C	TIF2	CR	No Msn2/4 binding site
YFR031C-A	RPL2A	TFIID	No Msn2/4 binding site
YJR139C	HOM6	TFIID	No Msn2/4 binding site
YOL004W	SIN3	TFIID	No Msn2/4 binding site
YPR033C	HTS1	TFIID	No Msn2/4 binding site
YJL140W	RPB4	TFIID	Msn2/4 binding site
YER112W	LSM4	TFIID	No Msn2/4 binding site
YGL114W	YGL114W	CR	Msn2/4 binding site
YOR051C	ETT1	TFIID	No Msn2/4 binding site
YML129C	COX14	TFIID	No Msn2/4 binding site
YDR211W	GCD6	TFIID	No Msn2/4 binding site
YKL181W	PRS1	TFIID	No Msn2/4 binding site
YDL191W	RPL35A	TFIID	No Msn2/4 binding site
YDR483W	KRE2	TFIID	No Msn2/4 binding site
YJL167W	ERG20	CR	No Msn2/4 binding site
YCR020W-B	HTL1	TFIID	Msn2/4 binding site
YBR279W	PAF1	TFIID	No Msn2/4 binding site
YJL174W	KRE9	TFIID	No Msn2/4 binding site
YJR145C	RPS4A	TFIID	Msn2/4 binding site
YOR260W	GCD1	TFIID	No Msn2/4 binding site
YOR317W	FAA1	TFIID	Msn2/4 binding site
YNL037C	IDH1	CR	No Msn2/4 binding site
YER049W	TPA1	TFIID	No Msn2/4 binding site
YBR031W	RPL4A	TFIID	No Msn2/4 binding site
YKL016C	ATP7	TFIID	No Msn2/4 binding site
YOR184W	SER1	CR	No Msn2/4 binding site
YER141W	COX15	TFIID	No Msn2/4 binding site
YLR106C	MDN1	TFIID	No Msn2/4 binding site
YER155C	BEM2	TFIID	Msn2/4 binding site
YGR065C	VHT1	CR	No Msn2/4 binding site
YDR309C	GIC2	CR	No Msn2/4 binding site
YER110C	KAP123	TFIID	No Msn2/4 binding site
YHR019C	DED81	TFIID	No Msn2/4 binding site
YDR372C	VPS74	TFIID	No Msn2/4 binding site
YBR071W	YBR071W	CR	No Msn2/4 binding site
YDR308C	SRB7	TFIID	No Msn2/4 binding site
YKL160W	ELF1	TFIID	No Msn2/4 binding site
YDL132W	CDC53	TFIID	No Msn2/4 binding site
YPR062W	FCY1	TFIID	Msn2/4 binding site
YOR123C	LEO1	TFIID	No Msn2/4 binding site
YDL066W	IDP1	CR	No Msn2/4 binding site
YBL004W	UTP20	TFIID	No Msn2/4 binding site
YCR028C-A	RIM1	TFIID	No Msn2/4 binding site
YNL137C	NAM9	TFIID	No Msn2/4 binding site
YPL158C	AIM44	CR	No Msn2/4 binding site
YLR244C	MAP1	TFIID	No Msn2/4 binding site
YPR028W	YOP1	CR	Msn2/4 binding site
YNL084C	END3	TFIID	Msn2/4 binding site
YGR270W	YTA7	TFIID	Msn2/4 binding site
YOL081W	IRA2	TFIID	No Msn2/4 binding site
YDR074W	TPS2	CR	Msn2/4 binding site
YBL051C	PIN4	TFIID	No Msn2/4 binding site
YGL137W	SEC27	TFIID	No Msn2/4 binding site
YBL047C	EDE1	TFIID	Msn2/4 binding site
YLR196W	PWP1	TFIID	No Msn2/4 binding site
YDL195W	SEC31	TFIID	Msn2/4 binding site
YGL252C	RTG2	TFIID	No Msn2/4 binding site
YKR066C	CCP1	CR	Msn2/4 binding site
YHR208W	BAT1	TFIID	No Msn2/4 binding site
YNL307C	MCK1	TFIID	No Msn2/4 binding site
YIR017C	MET28	CR	Msn2/4 binding site
YPL126W	NAN1	TFIID	Msn2/4 binding site
YDR529C	QCR7	TFIID	No Msn2/4 binding site
YDL134C	PPH21	TFIID	No Msn2/4 binding site
YLR025W	SNF7	TFIID	No Msn2/4 binding site
YDL136W	RPL35B	TFIID	No Msn2/4 binding site
YDR168W	CDC37	TFIID	No Msn2/4 binding site
YJR076C	CDC11	TFIID	No Msn2/4 binding site
YDR025W	RPS11A	TFIID	No Msn2/4 binding site
YOR194C	TOA1	TFIID	Msn2/4 binding site
YMR311C	GLC8	TFIID	No Msn2/4 binding site
YGR187C	HGH1	TFIID	No Msn2/4 binding site
YOR014W	RTS1	TFIID	Msn2/4 binding site
YHR089C	GAR1	TFIID	No Msn2/4 binding site
YLR406C	RPL31B	TFIID	No Msn2/4 binding site
YPL235W	RVB2	TFIID	No Msn2/4 binding site
YLR399C	BDF1	CR	No Msn2/4 binding site
YPL169C	MEX67	TFIID	No Msn2/4 binding site
YBR221C	PDB1	TFIID	No Msn2/4 binding site
YMR195W	ICY1	CR	No Msn2/4 binding site
YMR266W	RSN1	CR	No Msn2/4 binding site
YFR001W	LOC1	TFIID	No Msn2/4 binding site
YBL079W	NUP170	TFIID	No Msn2/4 binding site
YDL031W	DBP10	TFIID	No Msn2/4 binding site
YLR387C	REH1	TFIID	No Msn2/4 binding site
YFR030W	MET10	TFIID	No Msn2/4 binding site
YBR191W	RPL21A	TFIID	No Msn2/4 binding site
YLR449W	FPR4	TFIID	No Msn2/4 binding site
YGR281W	YOR1	CR	No Msn2/4 binding site
YDR404C	RPB7	TFIID	No Msn2/4 binding site
YPL063W	TIM50	TFIID	Msn2/4 binding site
YML108W	YML108W	TFIID	No Msn2/4 binding site
YHR205W	SCH9	TFIID	No Msn2/4 binding site
YDL153C	SAS10	TFIID	No Msn2/4 binding site
YLR452C	SST2	CR	No Msn2/4 binding site
YJL158C	CIS3	CR	Msn2/4 binding site
YLL018C	DPS1	TFIID	No Msn2/4 binding site
YDR069C	DOA4	CR	Msn2/4 binding site
YBR039W	ATP3	TFIID	No Msn2/4 binding site
YGL167C	PMR1	TFIID	No Msn2/4 binding site
YHR068W	DYS1	TFIID	No Msn2/4 binding site
YBR207W	FTH1	TFIID	No Msn2/4 binding site
YER125W	RSP5	TFIID	Msn2/4 binding site
YDR303C	RSC3	TFIID	No Msn2/4 binding site
YGL092W	NUP145	TFIID	No Msn2/4 binding site
YJL123C	MTC1	TFIID	No Msn2/4 binding site
YOL097C	WRS1	TFIID	No Msn2/4 binding site
YOR362C	PRE10	TFIID	Msn2/4 binding site
YKL007W	CAP1	TFIID	Msn2/4 binding site
YHR066W	SSF1	TFIID	No Msn2/4 binding site
YGR119C	NUP57	TFIID	No Msn2/4 binding site
YDR324C	UTP4	TFIID	No Msn2/4 binding site
YGL202W	ARO8	TFIID	No Msn2/4 binding site
YDR322C-A	TIM11	TFIID	No Msn2/4 binding site
YKL195W	MIA40	TFIID	No Msn2/4 binding site
YDR052C	DBF4	TFIID	No Msn2/4 binding site
YDR245W	MNN10	TFIID	No Msn2/4 binding site
YML008C	ERG6	CR	No Msn2/4 binding site
YMR083W	ADH3	TFIID	No Msn2/4 binding site
YBR172C	SMY2	TFIID	No Msn2/4 binding site
YJR137C	MET5	TFIID	No Msn2/4 binding site
YML053C	YML053C	TFIID	No Msn2/4 binding site
YDL100C	GET3	TFIID	No Msn2/4 binding site
YLR208W	SEC13	TFIID	No Msn2/4 binding site
YDR145W	TAF12	TFIID	No Msn2/4 binding site
YDR412W	RRP17	TFIID	No Msn2/4 binding site
YHR098C	SFB3	TFIID	No Msn2/4 binding site
YGR284C	ERV29	TFIID	No Msn2/4 binding site
YML117W	NAB6	TFIID	Msn2/4 binding site
YIL109C	SEC24	TFIID	No Msn2/4 binding site
YOR182C	RPS30B	TFIID	No Msn2/4 binding site
YML072C	TCB3	TFIID	Msn2/4 binding site
YDL205C	HEM3	CR	No Msn2/4 binding site
YDR208W	MSS4	TFIID	No Msn2/4 binding site
YLR403W	SFP1	TFIID	Msn2/4 binding site
YNL302C	RPS19B	TFIID	No Msn2/4 binding site
YOR058C	ASE1	TFIID	No Msn2/4 binding site
YDR251W	PAM1	TFIID	Msn2/4 binding site
YDR361C	BCP1	TFIID	No Msn2/4 binding site
YDR170C	SEC7	TFIID	No Msn2/4 binding site
YHR023W	MYO1	TFIID	No Msn2/4 binding site
YPL218W	SAR1	TFIID	No Msn2/4 binding site
YLR309C	IMH1	TFIID	No Msn2/4 binding site
YHR010W	RPL27A	TFIID	No Msn2/4 binding site
YJR073C	OPI3	CR	Msn2/4 binding site
YLR192C	HCR1	TFIID	No Msn2/4 binding site
YDL004W	ATP16	TFIID	Msn2/4 binding site
YJR002W	MPP10	TFIID	Msn2/4 binding site
YMR033W	ARP9	TFIID	No Msn2/4 binding site
YNL247W	YNL247W	TFIID	No Msn2/4 binding site
YOR047C	STD1	CR	No Msn2/4 binding site
YGL026C	TRP5	TFIID	No Msn2/4 binding site
YCR002C	CDC10	TFIID	No Msn2/4 binding site
YLR435W	TSR2	TFIID	No Msn2/4 binding site
YGR189C	CRH1	CR	No Msn2/4 binding site
YDL015C	TSC13	TFIID	No Msn2/4 binding site
YDR457W	TOM1	TFIID	No Msn2/4 binding site
YKL135C	APL2	TFIID	No Msn2/4 binding site
YKL142W	MRP8	TFIID	Msn2/4 binding site
YJR065C	ARP3	TFIID	Msn2/4 binding site
YKL086W	SRX1	CR	No Msn2/4 binding site
YDL051W	LHP1	TFIID	Msn2/4 binding site
YLR129W	DIP2	TFIID	No Msn2/4 binding site
YKL014C	URB1	TFIID	No Msn2/4 binding site
YJL039C	NUP192	TFIID	No Msn2/4 binding site
YJL122W	ALB1	TFIID	No Msn2/4 binding site
YGL070C	RPB9	TFIID	No Msn2/4 binding site
YLL051C	FRE6	TFIID	No Msn2/4 binding site
YER180C-A	SLO1	TFIID	No Msn2/4 binding site
YER042W	MXR1	CR	No Msn2/4 binding site
YDL161W	ENT1	TFIID	No Msn2/4 binding site
YKL077W	YKL077W	TFIID	No Msn2/4 binding site
YLR170C	APS1	TFIID	No Msn2/4 binding site
YMR216C	SKY1	TFIID	No Msn2/4 binding site
YLR223C	IFH1	TFIID	No Msn2/4 binding site
YNL271C	BNI1	TFIID	No Msn2/4 binding site
YGL225W	VRG4	TFIID	No Msn2/4 binding site
YLR206W	ENT2	TFIID	Msn2/4 binding site
YER117W	RPL23B	TFIID	No Msn2/4 binding site
YNR035C	ARC35	TFIID	No Msn2/4 binding site
YGL117W	YGL117W	CR	No Msn2/4 binding site
YOR187W	TUF1	TFIID	No Msn2/4 binding site
YMR109W	MYO5	TFIID	Msn2/4 binding site
YNL213C	RRG9	TFIID	No Msn2/4 binding site
YNL055C	POR1	CR	Msn2/4 binding site
YOL038W	PRE6	TFIID	No Msn2/4 binding site
YER161C	SPT2	TFIID	No Msn2/4 binding site
YJL179W	PFD1	TFIID	No Msn2/4 binding site
YLR225C	YLR225C	CR	Msn2/4 binding site
YLL048C	YBT1	TFIID	No Msn2/4 binding site
YDR300C	PRO1	TFIID	No Msn2/4 binding site
YPR133C	SPN1	TFIID	No Msn2/4 binding site
YHL047C	ARN2	CR	No Msn2/4 binding site
YML048W	GSF2	CR	No Msn2/4 binding site
YOL076W	MDM20	TFIID	No Msn2/4 binding site
YPR173C	VPS4	TFIID	No Msn2/4 binding site
YIL128W	MET18	TFIID	No Msn2/4 binding site
YLR378C	SEC61	TFIID	No Msn2/4 binding site
YKR001C	VPS1	TFIID	No Msn2/4 binding site
YHR081W	LRP1	TFIID	No Msn2/4 binding site
YNL175C	NOP13	TFIID	No Msn2/4 binding site
YFR009W	GCN20	TFIID	No Msn2/4 binding site
YDL022W	GPD1	CR	Msn2/4 binding site
YGL068W	MNP1	TFIID	Msn2/4 binding site
YBR112C	CYC8	TFIID	No Msn2/4 binding site
YMR080C	NAM7	TFIID	No Msn2/4 binding site
YGR214W	RPS0A	TFIID	No Msn2/4 binding site
YPR029C	APL4	TFIID	No Msn2/4 binding site
YER086W	ILV1	TFIID	No Msn2/4 binding site
YMR200W	ROT1	TFIID	No Msn2/4 binding site
YDR432W	NPL3	TFIID	Msn2/4 binding site
YCR035C	RRP43	TFIID	No Msn2/4 binding site
YMR031C	EIS1	CR	Msn2/4 binding site
YLR250W	SSP120	TFIID	No Msn2/4 binding site
YKR035W-A	DID2	TFIID	No Msn2/4 binding site
YIL027C	EMC5	TFIID	No Msn2/4 binding site
YHL040C	ARN1	CR	No Msn2/4 binding site
YCR016W	YCR016W	TFIID	No Msn2/4 binding site
YGR271C-A	EFG1	TFIID	No Msn2/4 binding site
YDL121C	YDL121C	TFIID	No Msn2/4 binding site
YPR148C	YPR148C	TFIID	No Msn2/4 binding site
YLR330W	CHS5	TFIID	No Msn2/4 binding site
YLR222C	UTP13	TFIID	No Msn2/4 binding site
YDR510W	SMT3	TFIID	No Msn2/4 binding site
YIL040W	APQ12	TFIID	No Msn2/4 binding site
YDL002C	NHP10	TFIID	No Msn2/4 binding site
YNR001C	CIT1	CR	No Msn2/4 binding site
YDL099W	BUG1	TFIID	No Msn2/4 binding site
YDR339C	FCF1	TFIID	No Msn2/4 binding site
YMR043W	MCM1	CR	No Msn2/4 binding site
YML069W	POB3	TFIID	Msn2/4 binding site
YLR168C	UPS2	CR	Msn2/4 binding site
YML010W	SPT5	TFIID	No Msn2/4 binding site
YLL009C	COX17	TFIID	No Msn2/4 binding site
YEL015W	EDC3	TFIID	No Msn2/4 binding site
YLL008W	DRS1	TFIID	No Msn2/4 binding site
YBR173C	UMP1	TFIID	No Msn2/4 binding site
YIL130W	ASG1	TFIID	No Msn2/4 binding site
YGR083C	GCD2	TFIID	No Msn2/4 binding site
YOR028C	CIN5	CR	No Msn2/4 binding site
YER138W-A	YER138W-A	CR	No Msn2/4 binding site
YIL074C	SER33	TFIID	No Msn2/4 binding site
YJR064W	CCT5	TFIID	No Msn2/4 binding site
YOR239W	ABP140	TFIID	No Msn2/4 binding site
YMR049C	ERB1	TFIID	No Msn2/4 binding site
YNL186W	UBP10	TFIID	No Msn2/4 binding site
YGR105W	VMA21	TFIID	No Msn2/4 binding site
YPL010W	RET3	TFIID	No Msn2/4 binding site
YPR112C	MRD1	TFIID	Msn2/4 binding site
YBR248C	HIS7	TFIID	No Msn2/4 binding site
YNL077W	APJ1	TFIID	Msn2/4 binding site
YOR020W-A	YOR020W-A	TFIID	No Msn2/4 binding site
YPL032C	SVL3	TFIID	No Msn2/4 binding site
YDL225W	SHS1	TFIID	No Msn2/4 binding site
YGR180C	RNR4	CR	No Msn2/4 binding site
YKL212W	SAC1	TFIID	No Msn2/4 binding site
YMR290C	HAS1	TFIID	No Msn2/4 binding site
YLR256W	HAP1	CR	Msn2/4 binding site
YJR090C	GRR1	TFIID	No Msn2/4 binding site
YBR048W	RPS11B	CR	No Msn2/4 binding site
YHR088W	RPF1	TFIID	No Msn2/4 binding site
YHL036W	MUP3	CR	Msn2/4 binding site
YIL036W	CST6	TFIID	Msn2/4 binding site
YBL105C	PKC1	TFIID	No Msn2/4 binding site
YJR044C	VPS55	TFIID	No Msn2/4 binding site
YNL176C	TDA7	CR	No Msn2/4 binding site
YOR158W	PET123	TFIID	No Msn2/4 binding site
YKL175W	ZRT3	TFIID	No Msn2/4 binding site
YGL086W	MAD1	TFIID	No Msn2/4 binding site
YER105C	NUP157	TFIID	No Msn2/4 binding site
YEL022W	GEA2	TFIID	No Msn2/4 binding site
YBR017C	KAP104	TFIID	Msn2/4 binding site
YPR144C	NOC4	TFIID	No Msn2/4 binding site
YBR171W	SEC66	TFIID	No Msn2/4 binding site
YDL088C	ASM4	TFIID	No Msn2/4 binding site
YEL002C	WBP1	TFIID	No Msn2/4 binding site
YHR039C-A	VMA10	TFIID	No Msn2/4 binding site
YNL123W	NMA111	TFIID	No Msn2/4 binding site
YIL144W	NDC80	TFIID	No Msn2/4 binding site
YFL034C-A	RPL22B	TFIID	No Msn2/4 binding site
YNL177C	MRPL22	TFIID	No Msn2/4 binding site
YLR153C	ACS2	CR	No Msn2/4 binding site
YPR048W	TAH18	TFIID	No Msn2/4 binding site
YPL217C	BMS1	TFIID	No Msn2/4 binding site
YLR200W	YKE2	TFIID	No Msn2/4 binding site
YJL076W	NET1	TFIID	No Msn2/4 binding site
YER056C-A	RPL34A	TFIID	No Msn2/4 binding site
YLR163C	MAS1	TFIID	No Msn2/4 binding site
YLR022C	SDO1	TFIID	No Msn2/4 binding site
YER068W	MOT2	TFIID	No Msn2/4 binding site
YPR060C	ARO7	TFIID	No Msn2/4 binding site
YHL020C	OPI1	TFIID	Msn2/4 binding site
YDL005C	MED2	TFIID	No Msn2/4 binding site
YIL105C	SLM1	TFIID	Msn2/4 binding site
YMR010W	YMR010W	TFIID	No Msn2/4 binding site
YAL029C	MYO4	TFIID	Msn2/4 binding site
YJL026W	RNR2	CR	Msn2/4 binding site
YGR009C	SEC9	TFIID	No Msn2/4 binding site
YMR090W	YMR090W	CR	No Msn2/4 binding site
YOL028C	YAP7	TFIID	No Msn2/4 binding site
YIL076W	SEC28	TFIID	No Msn2/4 binding site
YBL058W	SHP1	TFIID	No Msn2/4 binding site
YBR047W	FMP23	TFIID	Msn2/4 binding site
YBR069C	TAT1	CR	No Msn2/4 binding site
YOL036W	YOL036W	TFIID	No Msn2/4 binding site
YER050C	RSM18	TFIID	No Msn2/4 binding site
YCR084C	TUP1	TFIID	No Msn2/4 binding site
YOL064C	MET22	TFIID	No Msn2/4 binding site
YLR034C	SMF3	CR	Msn2/4 binding site
YPR101W	SNT309	TFIID	No Msn2/4 binding site
YLR229C	CDC42	TFIID	No Msn2/4 binding site
YJR070C	LIA1	TFIID	No Msn2/4 binding site
YPR168W	NUT2	TFIID	No Msn2/4 binding site
YLR287C	YLR287C	TFIID	No Msn2/4 binding site
YKL032C	IXR1	TFIID	Msn2/4 binding site
YGR233C	PHO81	TFIID	No Msn2/4 binding site
YDR354W	TRP4	TFIID	No Msn2/4 binding site
YJR004C	SAG1	CR	No Msn2/4 binding site
YKR016W	MIC60	TFIID	No Msn2/4 binding site
YGL071W	AFT1	TFIID	No Msn2/4 binding site
YLL039C	UBI4	CR	Msn2/4 binding site
YER094C	PUP3	TFIID	No Msn2/4 binding site
YDL065C	PEX19	TFIID	No Msn2/4 binding site
YOR141C	ARP8	TFIID	No Msn2/4 binding site
YLL027W	ISA1	CR	No Msn2/4 binding site
YER120W	SCS2	TFIID	No Msn2/4 binding site
YOR045W	TOM6	TFIID	No Msn2/4 binding site
YBR046C	ZTA1	CR	Msn2/4 binding site
YKR068C	BET3	TFIID	No Msn2/4 binding site
YDL155W	CLB3	TFIID	No Msn2/4 binding site
YOR116C	RPO31	TFIID	No Msn2/4 binding site
YJL166W	QCR8	TFIID	No Msn2/4 binding site
YDL106C	PHO2	TFIID	No Msn2/4 binding site
YER151C	UBP3	TFIID	Msn2/4 binding site
YDR525W-A	SNA2	TFIID	Msn2/4 binding site
YBR164C	ARL1	TFIID	No Msn2/4 binding site
YDR129C	SAC6	TFIID	No Msn2/4 binding site
YDL190C	UFD2	TFIID	No Msn2/4 binding site
YDR449C	UTP6	TFIID	No Msn2/4 binding site
YMR091C	NPL6	TFIID	No Msn2/4 binding site
YDR356W	SPC110	TFIID	No Msn2/4 binding site
YDR266C	HEL2	TFIID	No Msn2/4 binding site
YEL055C	POL5	TFIID	No Msn2/4 binding site
YGL120C	PRP43	TFIID	No Msn2/4 binding site
YMR014W	BUD22	TFIID	No Msn2/4 binding site
YKR043C	SHB17	TFIID	No Msn2/4 binding site
YDR292C	SRP101	TFIID	No Msn2/4 binding site
YDR165W	TRM82	TFIID	No Msn2/4 binding site
YLR027C	AAT2	CR	No Msn2/4 binding site
YDR188W	CCT6	TFIID	No Msn2/4 binding site
YLR335W	NUP2	TFIID	No Msn2/4 binding site
YNL243W	SLA2	TFIID	No Msn2/4 binding site
YOR195W	SLK19	TFIID	No Msn2/4 binding site
YBR198C	TAF5	TFIID	Msn2/4 binding site
YJL144W	YJL144W	CR	Msn2/4 binding site
YNL267W	PIK1	TFIID	No Msn2/4 binding site
YPR086W	SUA7	TFIID	No Msn2/4 binding site
YLL011W	SOF1	TFIID	No Msn2/4 binding site
YPR167C	MET16	TFIID	No Msn2/4 binding site
YLR083C	EMP70	TFIID	No Msn2/4 binding site
YNL169C	PSD1	CR	No Msn2/4 binding site
YPL129W	TAF14	TFIID	No Msn2/4 binding site
YGR089W	NNF2	TFIID	No Msn2/4 binding site
YOR281C	PLP2	TFIID	No Msn2/4 binding site
YOL061W	PRS5	TFIID	No Msn2/4 binding site
YGR026W	YGR026W	TFIID	No Msn2/4 binding site
YMR197C	VTI1	TFIID	No Msn2/4 binding site
YGR061C	ADE6	TFIID	No Msn2/4 binding site
YOR061W	CKA2	TFIID	Msn2/4 binding site
YML018C	YML018C	TFIID	No Msn2/4 binding site
YNR061C	YNR061C	TFIID	No Msn2/4 binding site
YLR436C	ECM30	TFIID	Msn2/4 binding site
YDR186C	YDR186C	TFIID	Msn2/4 binding site
YNL059C	ARP5	TFIID	No Msn2/4 binding site
YGL115W	SNF4	TFIID	No Msn2/4 binding site
YCL035C	GRX1	TFIID	Msn2/4 binding site
YNL103W	MET4	TFIID	No Msn2/4 binding site
YBR247C	ENP1	TFIID	No Msn2/4 binding site
YDL224C	WHI4	TFIID	No Msn2/4 binding site
YPL009C	RQC2	TFIID	No Msn2/4 binding site
YNL032W	SIW14	TFIID	No Msn2/4 binding site
YDR101C	ARX1	TFIID	No Msn2/4 binding site
YER019C-A	SBH2	TFIID	No Msn2/4 binding site
YLR384C	IKI3	TFIID	No Msn2/4 binding site
YJR005W	APL1	TFIID	No Msn2/4 binding site
YOR147W	MDM32	TFIID	No Msn2/4 binding site
YPR113W	PIS1	CR	Msn2/4 binding site
YAR002C-A	ERP1	TFIID	Msn2/4 binding site
YIL052C	RPL34B	TFIID	No Msn2/4 binding site
YOR098C	NUP1	TFIID	No Msn2/4 binding site
YGL080W	MPC1	TFIID	No Msn2/4 binding site
YHL001W	RPL14B	TFIID	No Msn2/4 binding site
YLL010C	PSR1	TFIID	Msn2/4 binding site
YER048C	CAJ1	TFIID	No Msn2/4 binding site
YDR257C	RKM4	TFIID	No Msn2/4 binding site
YGR078C	PAC10	TFIID	No Msn2/4 binding site
YHR108W	GGA2	TFIID	Msn2/4 binding site
YCR077C	PAT1	TFIID	Msn2/4 binding site
YEL063C	CAN1	TFIID	No Msn2/4 binding site
YML004C	GLO1	TFIID	Msn2/4 binding site
YPR163C	TIF3	TFIID	No Msn2/4 binding site
YGR134W	CAF130	TFIID	Msn2/4 binding site
YJR060W	CBF1	TFIID	No Msn2/4 binding site
YBL039C	URA7	TFIID	No Msn2/4 binding site
YBR181C	RPS6B	TFIID	No Msn2/4 binding site
YNL155W	CUZ1	TFIID	Msn2/4 binding site
YHL003C	LAG1	TFIID	Msn2/4 binding site
YIL021W	RPB3	TFIID	No Msn2/4 binding site
YFR039C	OSW7	TFIID	No Msn2/4 binding site
YKL088W	CAB3	TFIID	No Msn2/4 binding site
YDL058W	USO1	TFIID	No Msn2/4 binding site
YJL154C	VPS35	TFIID	Msn2/4 binding site
YGR186W	TFG1	TFIID	No Msn2/4 binding site
YJL041W	NSP1	TFIID	No Msn2/4 binding site
YKR082W	NUP133	TFIID	No Msn2/4 binding site
YDR176W	NGG1	TFIID	No Msn2/4 binding site
YCR008W	SAT4	TFIID	No Msn2/4 binding site
YOR327C	SNC2	TFIID	No Msn2/4 binding site
YCR106W	RDS1	TFIID	No Msn2/4 binding site
YMR054W	STV1	TFIID	No Msn2/4 binding site
YOR342C	YOR342C	TFIID	No Msn2/4 binding site
YLR190W	MMR1	TFIID	Msn2/4 binding site
YHR065C	RRP3	TFIID	No Msn2/4 binding site
YAR002W	NUP60	TFIID	No Msn2/4 binding site
YLR008C	PAM18	TFIID	No Msn2/4 binding site
YJL171C	YJL171C	CR	No Msn2/4 binding site
YDR351W	SBE2	TFIID	No Msn2/4 binding site
YPL228W	CET1	TFIID	No Msn2/4 binding site
YGR145W	ENP2	TFIID	No Msn2/4 binding site
YMR062C	ARG7	TFIID	No Msn2/4 binding site
YDR003W	RCR2	TFIID	No Msn2/4 binding site
YDR519W	FPR2	TFIID	No Msn2/4 binding site
YHR099W	TRA1	TFIID	No Msn2/4 binding site
YKL065C	YET1	TFIID	Msn2/4 binding site
YKL094W	YJU3	TFIID	Msn2/4 binding site
YGR033C	TIM21	TFIID	No Msn2/4 binding site
YMR100W	MUB1	TFIID	No Msn2/4 binding site
YHR199C	AIM46	CR	No Msn2/4 binding site
YKL020C	SPT23	TFIID	No Msn2/4 binding site
YIL022W	TIM44	TFIID	No Msn2/4 binding site
YJL143W	TIM17	TFIID	No Msn2/4 binding site
YLR409C	UTP21	TFIID	No Msn2/4 binding site
YJL117W	PHO86	TFIID	No Msn2/4 binding site
YPL094C	SEC62	TFIID	No Msn2/4 binding site
YGL014W	PUF4	TFIID	No Msn2/4 binding site
YHR111W	UBA4	TFIID	No Msn2/4 binding site
YGR040W	KSS1	CR	Msn2/4 binding site
YIL115C	NUP159	TFIID	Msn2/4 binding site
YPL013C	MRPS16	TFIID	No Msn2/4 binding site
YJL050W	MTR4	TFIID	No Msn2/4 binding site
YLR395C	COX8	TFIID	No Msn2/4 binding site
YJL145W	SFH5	TFIID	No Msn2/4 binding site
YLR056W	ERG3	CR	No Msn2/4 binding site
YJR016C	ILV3	CR	No Msn2/4 binding site
YNL149C	PGA2	TFIID	No Msn2/4 binding site
YGR198W	YPP1	TFIID	No Msn2/4 binding site
YLR295C	ATP14	TFIID	No Msn2/4 binding site
YOR207C	RET1	TFIID	No Msn2/4 binding site
YJL212C	OPT1	CR	No Msn2/4 binding site
YPL259C	APM1	TFIID	No Msn2/4 binding site
YDR083W	RRP8	TFIID	No Msn2/4 binding site
YLR058C	SHM2	TFIID	No Msn2/4 binding site
YKL205W	LOS1	TFIID	No Msn2/4 binding site
YLR398C	SKI2	TFIID	No Msn2/4 binding site
YPR159W	KRE6	TFIID	Msn2/4 binding site
YLR359W	ADE13	TFIID	No Msn2/4 binding site
YLR344W	RPL26A	TFIID	No Msn2/4 binding site
YJR046W	TAH11	TFIID	Msn2/4 binding site
YCR057C	PWP2	TFIID	No Msn2/4 binding site
YGL150C	INO80	TFIID	Msn2/4 binding site
YBL036C	YBL036C	TFIID	No Msn2/4 binding site
YMR243C	ZRC1	TFIID	No Msn2/4 binding site
YHR103W	SBE22	TFIID	No Msn2/4 binding site
YIL070C	MAM33	TFIID	No Msn2/4 binding site
YDR452W	PPN1	TFIID	No Msn2/4 binding site
YDL047W	SIT4	TFIID	Msn2/4 binding site
YDL040C	NAT1	TFIID	Msn2/4 binding site
YMR089C	YTA12	TFIID	No Msn2/4 binding site
YDR055W	PST1	CR	No Msn2/4 binding site
YOL006C	TOP1	TFIID	No Msn2/4 binding site
YGR193C	PDX1	TFIID	Msn2/4 binding site
YBR059C	AKL1	TFIID	Msn2/4 binding site
YNR043W	MVD1	TFIID	No Msn2/4 binding site
YJR010W	MET3	TFIID	No Msn2/4 binding site
YPL028W	ERG10	TFIID	No Msn2/4 binding site
YJR041C	URB2	TFIID	No Msn2/4 binding site
YDR385W	EFT2	TFIID	No Msn2/4 binding site
YOR304W	ISW2	TFIID	No Msn2/4 binding site
YDR045C	RPC11	TFIID	No Msn2/4 binding site
YOR216C	RUD3	TFIID	No Msn2/4 binding site
YDR472W	TRS31	TFIID	No Msn2/4 binding site
YJL004C	SYS1	TFIID	No Msn2/4 binding site
YDR463W	STP1	TFIID	No Msn2/4 binding site
YDL111C	RRP42	TFIID	No Msn2/4 binding site
YKL068W	NUP100	TFIID	No Msn2/4 binding site
YGR178C	PBP1	TFIID	No Msn2/4 binding site
YPL137C	GIP3	TFIID	No Msn2/4 binding site
YOR222W	ODC2	CR	No Msn2/4 binding site
YGR060W	ERG25	CR	No Msn2/4 binding site
YOR107W	RGS2	CR	No Msn2/4 binding site
YAR014C	BUD14	TFIID	No Msn2/4 binding site
YDR320C-A	DAD4	TFIID	No Msn2/4 binding site
YFR037C	RSC8	TFIID	No Msn2/4 binding site
YBR088C	POL30	CR	No Msn2/4 binding site
YHR206W	SKN7	TFIID	No Msn2/4 binding site
YDR068W	DOS2	TFIID	No Msn2/4 binding site
YCL059C	KRR1	TFIID	No Msn2/4 binding site
YOR305W	RRG7	TFIID	No Msn2/4 binding site
YJL128C	PBS2	TFIID	No Msn2/4 binding site
YHR148W	IMP3	TFIID	No Msn2/4 binding site
YAL007C	ERP2	TFIID	No Msn2/4 binding site
YGL184C	STR3	CR	Msn2/4 binding site
YHR104W	GRE3	CR	No Msn2/4 binding site
YLR418C	CDC73	TFIID	No Msn2/4 binding site
YNL258C	DSL1	TFIID	No Msn2/4 binding site
YPR089W	YPR089W	TFIID	No Msn2/4 binding site
YLL013C	PUF3	TFIID	No Msn2/4 binding site
YOL051W	GAL11	TFIID	No Msn2/4 binding site
YMR047C	NUP116	TFIID	No Msn2/4 binding site
YDR298C	ATP5	TFIID	No Msn2/4 binding site
YOL098C	YOL098C	TFIID	No Msn2/4 binding site
YAL041W	CDC24	TFIID	No Msn2/4 binding site
YOR243C	PUS7	TFIID	No Msn2/4 binding site
YGR195W	SKI6	TFIID	No Msn2/4 binding site
YHL007C	STE20	TFIID	No Msn2/4 binding site
YLR248W	RCK2	TFIID	No Msn2/4 binding site
YKL101W	HSL1	CR	No Msn2/4 binding site
YOL126C	MDH2	CR	No Msn2/4 binding site
YBR256C	RIB5	CR	No Msn2/4 binding site
YGR280C	PXR1	TFIID	No Msn2/4 binding site
YFL008W	SMC1	TFIID	No Msn2/4 binding site
YBL026W	LSM2	TFIID	No Msn2/4 binding site
YPL271W	ATP15	TFIID	Msn2/4 binding site
YLR314C	CDC3	TFIID	No Msn2/4 binding site
YOL119C	MCH4	CR	No Msn2/4 binding site
YMR319C	FET4	CR	No Msn2/4 binding site
YLR224W	YLR224W	TFIID	No Msn2/4 binding site
YNL138W	SRV2	TFIID	No Msn2/4 binding site
YLR410W	VIP1	TFIID	No Msn2/4 binding site
YDR227W	SIR4	TFIID	No Msn2/4 binding site
YGL101W	YGL101W	TFIID	No Msn2/4 binding site
YBR249C	ARO4	CR	No Msn2/4 binding site
YNR067C	DSE4	CR	No Msn2/4 binding site
YNL001W	DOM34	TFIID	No Msn2/4 binding site
YDR006C	SOK1	TFIID	No Msn2/4 binding site
YBR287W	YBR287W	TFIID	Msn2/4 binding site
YNL004W	HRB1	TFIID	No Msn2/4 binding site
YKL190W	CNB1	TFIID	No Msn2/4 binding site
YOR162C	YRR1	TFIID	No Msn2/4 binding site
YOR212W	STE4	TFIID	Msn2/4 binding site
YGR191W	HIP1	TFIID	Msn2/4 binding site
YER008C	SEC3	TFIID	No Msn2/4 binding site
YKL058W	TOA2	TFIID	No Msn2/4 binding site
YGL246C	RAI1	TFIID	No Msn2/4 binding site
YNL132W	KRE33	TFIID	No Msn2/4 binding site
YOR244W	ESA1	TFIID	Msn2/4 binding site
YDR507C	GIN4	TFIID	No Msn2/4 binding site
YKL061W	BLI1	TFIID	No Msn2/4 binding site
YJR003C	YJR003C	CR	No Msn2/4 binding site
YNL263C	YIF1	TFIID	Msn2/4 binding site
YNL192W	CHS1	CR	No Msn2/4 binding site
YJL036W	SNX4	TFIID	Msn2/4 binding site
YOL012C	HTZ1	TFIID	No Msn2/4 binding site
YNL297C	MON2	TFIID	Msn2/4 binding site
YDL063C	SYO1	TFIID	No Msn2/4 binding site
YBR036C	CSG2	TFIID	No Msn2/4 binding site
YMR044W	IOC4	TFIID	No Msn2/4 binding site
YDR500C	RPL37B	TFIID	No Msn2/4 binding site
YOR354C	MSC6	TFIID	No Msn2/4 binding site
YKL004W	AUR1	TFIID	No Msn2/4 binding site
YPL011C	TAF3	TFIID	No Msn2/4 binding site
YJL010C	NOP9	TFIID	No Msn2/4 binding site
YDL212W	SHR3	TFIID	No Msn2/4 binding site
YNL135C	FPR1	CR	Msn2/4 binding site
YNL130C	CPT1	CR	No Msn2/4 binding site
YOL021C	DIS3	TFIID	No Msn2/4 binding site
YGL108C	YGL108C	TFIID	No Msn2/4 binding site
YDR169C	STB3	TFIID	No Msn2/4 binding site
YNL313C	EMW1	TFIID	No Msn2/4 binding site
YCR034W	ELO2	TFIID	No Msn2/4 binding site
YML001W	YPT7	TFIID	No Msn2/4 binding site
YDL171C	GLT1	TFIID	No Msn2/4 binding site
YLR003C	CMS1	TFIID	No Msn2/4 binding site
YER063W	THO1	TFIID	No Msn2/4 binding site
YKR063C	LAS1	TFIID	No Msn2/4 binding site
YDL072C	YET3	TFIID	Msn2/4 binding site
YKL176C	LST4	TFIID	No Msn2/4 binding site
YIR033W	MGA2	TFIID	No Msn2/4 binding site
YKL185W	ASH1	CR	No Msn2/4 binding site
YKL044W	YKL044W	CR	Msn2/4 binding site
YDR005C	MAF1	TFIID	Msn2/4 binding site
YNL191W	DUG3	TFIID	No Msn2/4 binding site
YNR019W	ARE2	CR	Msn2/4 binding site
YBL064C	PRX1	CR	No Msn2/4 binding site
YNL041C	COG6	TFIID	No Msn2/4 binding site
YKL143W	LTV1	TFIID	No Msn2/4 binding site
YLR071C	RGR1	TFIID	No Msn2/4 binding site
YLR026C	SED5	TFIID	No Msn2/4 binding site
YNL272C	SEC2	TFIID	No Msn2/4 binding site
YOR227W	HER1	CR	Msn2/4 binding site
YOR285W	RDL1	TFIID	Msn2/4 binding site
YKL087C	CYT2	TFIID	No Msn2/4 binding site
YBR122C	MRPL36	TFIID	No Msn2/4 binding site
YJR042W	NUP85	TFIID	No Msn2/4 binding site
YCR003W	MRPL32	TFIID	No Msn2/4 binding site
YLR028C	ADE16	TFIID	No Msn2/4 binding site
YJL104W	PAM16	TFIID	No Msn2/4 binding site
YDL226C	GCS1	TFIID	No Msn2/4 binding site
YOR372C	NDD1	TFIID	No Msn2/4 binding site
YOL020W	TAT2	TFIID	No Msn2/4 binding site
YDR210W	YDR210W	CR	No Msn2/4 binding site
YGR183C	QCR9	TFIID	No Msn2/4 binding site
YDR262W	YDR262W	TFIID	No Msn2/4 binding site
YML086C	ALO1	TFIID	No Msn2/4 binding site
YIL041W	GVP36	TFIID	No Msn2/4 binding site
YGR245C	SDA1	TFIID	No Msn2/4 binding site
YNR038W	DBP6	TFIID	No Msn2/4 binding site
YER022W	SRB4	TFIID	No Msn2/4 binding site
YDL035C	GPR1	TFIID	No Msn2/4 binding site
YJR125C	ENT3	TFIID	Msn2/4 binding site
YCL030C	HIS4	CR	No Msn2/4 binding site
YLL021W	SPA2	TFIID	No Msn2/4 binding site
YOR159C	SME1	TFIID	No Msn2/4 binding site
YPL059W	GRX5	TFIID	No Msn2/4 binding site
YLR052W	IES3	TFIID	No Msn2/4 binding site
YGL106W	MLC1	TFIID	No Msn2/4 binding site
YDR527W	RBA50	TFIID	No Msn2/4 binding site
YIL112W	HOS4	TFIID	No Msn2/4 binding site
YOR375C	GDH1	CR	No Msn2/4 binding site
YOR165W	SEY1	TFIID	No Msn2/4 binding site
YFL013C	IES1	TFIID	No Msn2/4 binding site
YKL033W-A	YKL033W-A	TFIID	No Msn2/4 binding site
YNL221C	POP1	TFIID	No Msn2/4 binding site
YEL003W	GIM4	TFIID	Msn2/4 binding site
YOR142W	LSC1	CR	No Msn2/4 binding site
YBR126C	TPS1	CR	Msn2/4 binding site
YNR031C	SSK2	TFIID	No Msn2/4 binding site
YMR001C-A	YMR001C-A	CR	No Msn2/4 binding site
YMR291W	TDA1	CR	Msn2/4 binding site
YMR093W	UTP15	TFIID	No Msn2/4 binding site
YJL192C	SOP4	TFIID	No Msn2/4 binding site
YMR212C	EFR3	TFIID	No Msn2/4 binding site
YPR097W	YPR097W	TFIID	No Msn2/4 binding site
YNL268W	LYP1	TFIID	No Msn2/4 binding site
YLR336C	SGD1	TFIID	No Msn2/4 binding site
YGL233W	SEC15	TFIID	No Msn2/4 binding site
YGR207C	CIR1	TFIID	No Msn2/4 binding site
YNL010W	YNL010W	TFIID	No Msn2/4 binding site
YGR184C	UBR1	TFIID	No Msn2/4 binding site
YPL195W	APL5	TFIID	No Msn2/4 binding site
YDR378C	LSM6	TFIID	No Msn2/4 binding site
YBR253W	SRB6	TFIID	Msn2/4 binding site
YIL056W	VHR1	CR	Msn2/4 binding site
YOR085W	OST3	TFIID	No Msn2/4 binding site
YHR026W	VMA16	TFIID	No Msn2/4 binding site
YDL112W	TRM3	TFIID	Msn2/4 binding site
YLR357W	RSC2	TFIID	No Msn2/4 binding site
YDL198C	GGC1	CR	No Msn2/4 binding site
YPR105C	COG4	TFIID	No Msn2/4 binding site
YBR054W	YRO2	CR	No Msn2/4 binding site
YOR311C	DGK1	TFIID	No Msn2/4 binding site
YHR006W	STP2	TFIID	No Msn2/4 binding site
YKR100C	SKG1	TFIID	No Msn2/4 binding site
YGL013C	PDR1	TFIID	No Msn2/4 binding site
YPL053C	KTR6	TFIID	No Msn2/4 binding site
YJR134C	SGM1	TFIID	No Msn2/4 binding site
YOR241W	MET7	TFIID	No Msn2/4 binding site
YLL034C	RIX7	TFIID	No Msn2/4 binding site
YGL038C	OCH1	CR	No Msn2/4 binding site
YKL204W	EAP1	TFIID	No Msn2/4 binding site
YDR146C	SWI5	TFIID	No Msn2/4 binding site
YKR031C	SPO14	TFIID	No Msn2/4 binding site
YPR125W	YLH47	TFIID	No Msn2/4 binding site
YKR061W	KTR2	CR	No Msn2/4 binding site
YMR255W	GFD1	TFIID	No Msn2/4 binding site
YNL236W	SIN4	TFIID	No Msn2/4 binding site
YOR191W	ULS1	TFIID	No Msn2/4 binding site
YIL030C	SSM4	TFIID	No Msn2/4 binding site
YBR179C	FZO1	TFIID	No Msn2/4 binding site
YDR034C	LYS14	TFIID	No Msn2/4 binding site
YDR219C	MFB1	TFIID	No Msn2/4 binding site
YOR103C	OST2	TFIID	No Msn2/4 binding site
YNL006W	LST8	TFIID	No Msn2/4 binding site
YDR333C	RQC1	TFIID	No Msn2/4 binding site
YDR027C	VPS54	TFIID	No Msn2/4 binding site
YKR093W	PTR2	CR	Msn2/4 binding site
YHR020W	YHR020W	TFIID	No Msn2/4 binding site
YJL098W	SAP185	TFIID	No Msn2/4 binding site
YNL239W	LAP3	CR	Msn2/4 binding site
YEL061C	CIN8	TFIID	No Msn2/4 binding site
YGL140C	YGL140C	TFIID	No Msn2/4 binding site
YPR070W	MED1	TFIID	No Msn2/4 binding site
YBL007C	SLA1	TFIID	Msn2/4 binding site
YNR068C	YNR068C	TFIID	No Msn2/4 binding site
YBR142W	MAK5	TFIID	No Msn2/4 binding site
YLR113W	HOG1	CR	No Msn2/4 binding site
YER129W	SAK1	TFIID	No Msn2/4 binding site
YNL252C	MRPL17	TFIID	No Msn2/4 binding site
YER127W	LCP5	TFIID	No Msn2/4 binding site
YDR087C	RRP1	TFIID	No Msn2/4 binding site
YMR140W	SIP5	TFIID	Msn2/4 binding site
YDR515W	SLF1	TFIID	No Msn2/4 binding site
YGR158C	MTR3	TFIID	No Msn2/4 binding site
YOR376W-A	YOR376W-A	TFIID	Msn2/4 binding site
YMR256C	COX7	TFIID	No Msn2/4 binding site
YER092W	IES5	TFIID	No Msn2/4 binding site
YHR201C	PPX1	TFIID	No Msn2/4 binding site
YJL176C	SWI3	TFIID	No Msn2/4 binding site
YFL036W	RPO41	TFIID	No Msn2/4 binding site
YDR468C	TLG1	TFIID	No Msn2/4 binding site
YDL003W	MCD1	CR	No Msn2/4 binding site
YLR019W	PSR2	TFIID	No Msn2/4 binding site
YDR407C	TRS120	TFIID	No Msn2/4 binding site
YFL048C	EMP47	TFIID	No Msn2/4 binding site
YLR181C	VTA1	TFIID	Msn2/4 binding site
YOR157C	PUP1	TFIID	No Msn2/4 binding site
YGR200C	ELP2	TFIID	No Msn2/4 binding site
YOR021C	SFM1	TFIID	No Msn2/4 binding site
YDR328C	SKP1	TFIID	No Msn2/4 binding site
YMR153W	NUP53	TFIID	No Msn2/4 binding site
YER082C	UTP7	TFIID	No Msn2/4 binding site
YJL196C	ELO1	CR	No Msn2/4 binding site
YJL183W	MNN11	TFIID	No Msn2/4 binding site
YDR081C	PDC2	TFIID	No Msn2/4 binding site
YER166W	DNF1	TFIID	No Msn2/4 binding site
YBR140C	IRA1	TFIID	No Msn2/4 binding site
YJR091C	JSN1	TFIID	Msn2/4 binding site
YLR084C	RAX2	CR	No Msn2/4 binding site
YJR092W	BUD4	TFIID	Msn2/4 binding site
YDR326C	YSP2	TFIID	No Msn2/4 binding site
YBL085W	BOI1	TFIID	No Msn2/4 binding site
YHR049W	FSH1	CR	No Msn2/4 binding site
YNR022C	MRPL50	TFIID	No Msn2/4 binding site
YLR182W	SWI6	TFIID	No Msn2/4 binding site
YKR092C	SRP40	TFIID	No Msn2/4 binding site
YIL094C	LYS12	TFIID	No Msn2/4 binding site
YGL151W	NUT1	TFIID	No Msn2/4 binding site
YGR072W	UPF3	TFIID	No Msn2/4 binding site
YOR283W	YOR283W	TFIID	No Msn2/4 binding site
YDR150W	NUM1	TFIID	No Msn2/4 binding site
YHL002W	HSE1	TFIID	No Msn2/4 binding site
YBR149W	ARA1	CR	No Msn2/4 binding site
YGL090W	LIF1	TFIID	No Msn2/4 binding site
YNL216W	RAP1	TFIID	No Msn2/4 binding site
YLR023C	IZH3	TFIID	No Msn2/4 binding site
YBL050W	SEC17	TFIID	No Msn2/4 binding site
YKL154W	SRP102	TFIID	No Msn2/4 binding site
YDL073W	YDL073W	TFIID	No Msn2/4 binding site
YPL184C	MRN1	TFIID	No Msn2/4 binding site
YIL091C	UTP25	TFIID	Msn2/4 binding site
YKL192C	ACP1	TFIID	Msn2/4 binding site
YJL207C	LAA1	TFIID	No Msn2/4 binding site
YLR371W	ROM2	TFIID	No Msn2/4 binding site
YKL213C	DOA1	TFIID	No Msn2/4 binding site
YNL156C	NSG2	TFIID	Msn2/4 binding site
YDR390C	UBA2	TFIID	No Msn2/4 binding site
YPR008W	HAA1	TFIID	No Msn2/4 binding site
YNL039W	BDP1	TFIID	No Msn2/4 binding site
YEL001C	IRC22	TFIID	No Msn2/4 binding site
YDL085C-A	YDL085C-A	TFIID	No Msn2/4 binding site
YDR334W	SWR1	TFIID	No Msn2/4 binding site
YLR133W	CKI1	TFIID	No Msn2/4 binding site
YMR129W	POM152	TFIID	No Msn2/4 binding site
YJL069C	UTP18	TFIID	No Msn2/4 binding site
YOR323C	PRO2	TFIID	No Msn2/4 binding site
YLR370C	ARC18	TFIID	No Msn2/4 binding site
YMR305C	SCW10	CR	No Msn2/4 binding site
YML031W	NDC1	TFIID	No Msn2/4 binding site
YJR086W	STE18	TFIID	No Msn2/4 binding site
YCR042C	TAF2	TFIID	No Msn2/4 binding site
YGL091C	NBP35	TFIID	No Msn2/4 binding site
YBR165W	UBS1	TFIID	No Msn2/4 binding site
YJL082W	IML2	CR	No Msn2/4 binding site
YER007C-A	TMA20	TFIID	No Msn2/4 binding site
YPR100W	MRPL51	TFIID	No Msn2/4 binding site
YNL219C	ALG9	TFIID	No Msn2/4 binding site
YOR145C	PNO1	TFIID	No Msn2/4 binding site
YOR048C	RAT1	TFIID	No Msn2/4 binding site
YKR067W	GPT2	TFIID	Msn2/4 binding site
YDR166C	SEC5	TFIID	No Msn2/4 binding site
YDR337W	MRPS28	TFIID	No Msn2/4 binding site
YHR021C	RPS27B	TFIID	Msn2/4 binding site
YNL167C	SKO1	TFIID	No Msn2/4 binding site
YEL007W	MIT1	CR	Msn2/4 binding site
YAL019W	FUN30	TFIID	No Msn2/4 binding site
YOR124C	UBP2	TFIID	No Msn2/4 binding site
YER176W	ECM32	TFIID	No Msn2/4 binding site
YMR149W	SWP1	TFIID	No Msn2/4 binding site
YMR064W	AEP1	TFIID	No Msn2/4 binding site
YNL232W	CSL4	TFIID	No Msn2/4 binding site
YOR004W	UTP23	TFIID	No Msn2/4 binding site
YOR315W	SFG1	CR	No Msn2/4 binding site
YDL167C	NRP1	TFIID	No Msn2/4 binding site
YOR036W	PEP12	TFIID	No Msn2/4 binding site
YGL231C	EMC4	TFIID	No Msn2/4 binding site
YMR004W	MVP1	TFIID	No Msn2/4 binding site
YGR082W	TOM20	TFIID	No Msn2/4 binding site
YGR215W	RSM27	TFIID	No Msn2/4 binding site
YDR177W	UBC1	TFIID	Msn2/4 binding site
YKL015W	PUT3	TFIID	No Msn2/4 binding site
YEL037C	RAD23	TFIID	No Msn2/4 binding site
YAL036C	RBG1	TFIID	Msn2/4 binding site
YLR195C	NMT1	TFIID	No Msn2/4 binding site
YER164W	CHD1	TFIID	No Msn2/4 binding site
YLR093C	NYV1	TFIID	Msn2/4 binding site
YLR291C	GCD7	TFIID	No Msn2/4 binding site
YML111W	BUL2	TFIID	No Msn2/4 binding site
YDR162C	NBP2	TFIID	No Msn2/4 binding site
YKL100C	YPF1	TFIID	Msn2/4 binding site
YJL060W	BNA3	TFIID	Msn2/4 binding site
YLR086W	SMC4	TFIID	No Msn2/4 binding site
YNL162W	RPL42A	TFIID	No Msn2/4 binding site
YKR026C	GCN3	TFIID	No Msn2/4 binding site
YAL040C	CLN3	CR	No Msn2/4 binding site
YJL110C	GZF3	TFIID	Msn2/4 binding site
YOR307C	SLY41	TFIID	No Msn2/4 binding site
YBR002C	RER2	TFIID	No Msn2/4 binding site
YDR423C	CAD1	TFIID	No Msn2/4 binding site
YIL116W	HIS5	CR	No Msn2/4 binding site
YDR505C	PSP1	TFIID	No Msn2/4 binding site
YDR477W	SNF1	TFIID	Msn2/4 binding site
YEL043W	YEL043W	TFIID	Msn2/4 binding site
YDL095W	PMT1	TFIID	No Msn2/4 binding site
YPL085W	SEC16	TFIID	No Msn2/4 binding site
YGL107C	RMD9	TFIID	No Msn2/4 binding site
YLR312W-A	MRPL15	TFIID	No Msn2/4 binding site
YNR017W	TIM23	TFIID	No Msn2/4 binding site
YML015C	TAF11	TFIID	No Msn2/4 binding site
YMR237W	BCH1	TFIID	No Msn2/4 binding site
YDR388W	RVS167	TFIID	No Msn2/4 binding site
YGR123C	PPT1	TFIID	No Msn2/4 binding site
YNL300W	TOS6	CR	No Msn2/4 binding site
YDR331W	GPI8	TFIID	No Msn2/4 binding site
YKR062W	TFA2	TFIID	No Msn2/4 binding site
YPL084W	BRO1	TFIID	No Msn2/4 binding site
YPL183C	RTT10	TFIID	No Msn2/4 binding site
YGL082W	YGL082W	TFIID	Msn2/4 binding site
YDR389W	SAC7	TFIID	No Msn2/4 binding site
YNL188W	KAR1	TFIID	No Msn2/4 binding site
YBR080C	SEC18	TFIID	No Msn2/4 binding site
YIR006C	PAN1	TFIID	No Msn2/4 binding site
YGR274C	TAF1	TFIID	No Msn2/4 binding site
YBR187W	GDT1	TFIID	No Msn2/4 binding site
YPL143W	RPL33A	TFIID	No Msn2/4 binding site
YHR030C	SLT2	TFIID	No Msn2/4 binding site
YMR077C	VPS20	TFIID	No Msn2/4 binding site
YPR189W	SKI3	TFIID	No Msn2/4 binding site
YMR024W	MRPL3	TFIID	No Msn2/4 binding site
YJL044C	GYP6	TFIID	No Msn2/4 binding site
YDL240W	LRG1	TFIID	No Msn2/4 binding site
YML062C	MFT1	TFIID	No Msn2/4 binding site
YLR274W	MCM5	TFIID	No Msn2/4 binding site
YER080W	AIM9	TFIID	No Msn2/4 binding site
YOR001W	RRP6	TFIID	No Msn2/4 binding site
YKL126W	YPK1	TFIID	No Msn2/4 binding site
YMR099C	YMR099C	TFIID	No Msn2/4 binding site
YDR116C	MRPL1	TFIID	No Msn2/4 binding site
YLR298C	YHC1	TFIID	No Msn2/4 binding site
YBL061C	SKT5	TFIID	No Msn2/4 binding site
YKR059W	TIF1	TFIID	No Msn2/4 binding site
YLR332W	MID2	TFIID	No Msn2/4 binding site
YDR398W	UTP5	TFIID	Msn2/4 binding site
YMR128W	ECM16	TFIID	No Msn2/4 binding site
YGR250C	YGR250C	CR	No Msn2/4 binding site
YOR234C	RPL33B	TFIID	No Msn2/4 binding site
YKR089C	TGL4	TFIID	Msn2/4 binding site
YPR119W	CLB2	CR	No Msn2/4 binding site
YPR004C	AIM45	TFIID	No Msn2/4 binding site
YIL127C	RRT14	TFIID	No Msn2/4 binding site
YLR079W	SIC1	CR	Msn2/4 binding site
YIR004W	DJP1	TFIID	No Msn2/4 binding site
YOR316C	COT1	TFIID	No Msn2/4 binding site
YPR161C	SGV1	TFIID	No Msn2/4 binding site
YLL014W	EMC6	TFIID	No Msn2/4 binding site
YNL256W	FOL1	TFIID	No Msn2/4 binding site
YNL139C	THO2	TFIID	No Msn2/4 binding site
YOR340C	RPA43	TFIID	No Msn2/4 binding site
YNL306W	MRPS18	TFIID	No Msn2/4 binding site
YDR313C	PIB1	TFIID	No Msn2/4 binding site
YEL052W	AFG1	TFIID	No Msn2/4 binding site
YOR056C	NOB1	TFIID	No Msn2/4 binding site
YGL194C	HOS2	TFIID	No Msn2/4 binding site
YOR101W	RAS1	TFIID	No Msn2/4 binding site
YKR096W	ESL2	TFIID	No Msn2/4 binding site
YKL109W	HAP4	CR	No Msn2/4 binding site
YLR275W	SMD2	TFIID	No Msn2/4 binding site
YGL020C	GET1	TFIID	No Msn2/4 binding site
YML105C	SEC65	TFIID	No Msn2/4 binding site
YOR030W	DFG16	TFIID	No Msn2/4 binding site
YKL049C	CSE4	TFIID	No Msn2/4 binding site
YLR412W	BER1	TFIID	No Msn2/4 binding site
YLR301W	HRI1	TFIID	No Msn2/4 binding site
YLR305C	STT4	TFIID	No Msn2/4 binding site
YOR322C	LDB19	TFIID	No Msn2/4 binding site
YMR298W	LIP1	TFIID	Msn2/4 binding site
YDR184C	ATC1	TFIID	No Msn2/4 binding site
YDL037C	BSC1	CR	No Msn2/4 binding site
YNL201C	PSY2	TFIID	No Msn2/4 binding site
YHR107C	CDC12	TFIID	No Msn2/4 binding site
YGR251W	NOP19	TFIID	No Msn2/4 binding site
YDR141C	DOP1	TFIID	No Msn2/4 binding site
YHR009C	TDA3	TFIID	Msn2/4 binding site
YDL060W	TSR1	TFIID	No Msn2/4 binding site
YNL081C	SWS2	TFIID	No Msn2/4 binding site
YCL010C	SGF29	TFIID	No Msn2/4 binding site
YMR272C	SCS7	CR	No Msn2/4 binding site
YER178W	PDA1	TFIID	Msn2/4 binding site
YLR363C	NMD4	TFIID	No Msn2/4 binding site
YIR018W	YAP5	TFIID	Msn2/4 binding site
YGL056C	SDS23	TFIID	No Msn2/4 binding site
YNL075W	IMP4	TFIID	No Msn2/4 binding site
YDR120C	TRM1	TFIID	No Msn2/4 binding site
YGL171W	ROK1	TFIID	No Msn2/4 binding site
YDR373W	FRQ1	TFIID	No Msn2/4 binding site
YKL211C	TRP3	TFIID	No Msn2/4 binding site
YDL207W	GLE1	TFIID	No Msn2/4 binding site
YLR401C	DUS3	TFIID	No Msn2/4 binding site
YLR321C	SFH1	TFIID	No Msn2/4 binding site
YLR038C	COX12	TFIID	No Msn2/4 binding site
YNR047W	FPK1	TFIID	No Msn2/4 binding site
YLR185W	RPL37A	TFIID	Msn2/4 binding site
YDR232W	HEM1	TFIID	No Msn2/4 binding site
YOR075W	UFE1	TFIID	Msn2/4 binding site
YMR314W	PRE5	TFIID	No Msn2/4 binding site
YBL103C	RTG3	TFIID	No Msn2/4 binding site
YDR464W	SPP41	TFIID	No Msn2/4 binding site
YNL301C	RPL18B	CR	No Msn2/4 binding site
YPR042C	PUF2	TFIID	No Msn2/4 binding site
YDR041W	RSM10	TFIID	No Msn2/4 binding site
YBR245C	ISW1	TFIID	No Msn2/4 binding site
YDR138W	HPR1	TFIID	No Msn2/4 binding site
YJL096W	MRPL49	TFIID	No Msn2/4 binding site
YIL062C	ARC15	TFIID	No Msn2/4 binding site
YDL135C	RDI1	TFIID	No Msn2/4 binding site
YIL084C	SDS3	TFIID	No Msn2/4 binding site
YNL161W	CBK1	TFIID	No Msn2/4 binding site
YDR458C	HEH2	TFIID	No Msn2/4 binding site
YML092C	PRE8	TFIID	No Msn2/4 binding site
YHR013C	ARD1	TFIID	No Msn2/4 binding site
YGL148W	ARO2	TFIID	No Msn2/4 binding site
YGL055W	OLE1	CR	No Msn2/4 binding site
YDR001C	NTH1	CR	Msn2/4 binding site
YOR095C	RKI1	TFIID	Msn2/4 binding site
YGR074W	SMD1	TFIID	No Msn2/4 binding site
YJL129C	TRK1	TFIID	Msn2/4 binding site
YHR090C	YNG2	TFIID	No Msn2/4 binding site
YHR152W	SPO12	TFIID	No Msn2/4 binding site
YGL039W	YGL039W	TFIID	No Msn2/4 binding site
YKL099C	UTP11	TFIID	No Msn2/4 binding site
YOL030W	GAS5	CR	No Msn2/4 binding site
YIL031W	ULP2	TFIID	No Msn2/4 binding site
YBR058C-A	TSC3	TFIID	No Msn2/4 binding site
YPL189C-A	COA2	TFIID	Msn2/4 binding site
YPL211W	NIP7	TFIID	No Msn2/4 binding site
YLR114C	AVL9	TFIID	No Msn2/4 binding site
YHR123W	EPT1	TFIID	No Msn2/4 binding site
YOR272W	YTM1	TFIID	No Msn2/4 binding site
YPR025C	CCL1	TFIID	No Msn2/4 binding site
YBL033C	RIB1	CR	No Msn2/4 binding site
YGR261C	APL6	TFIID	No Msn2/4 binding site
YLR045C	STU2	TFIID	No Msn2/4 binding site
YDR161W	YDR161W	TFIID	No Msn2/4 binding site
YKR056W	TRM2	TFIID	No Msn2/4 binding site
YDR189W	SLY1	TFIID	No Msn2/4 binding site
YBR151W	APD1	TFIID	No Msn2/4 binding site
YNR074C	AIF1	CR	No Msn2/4 binding site
YKL167C	MRP49	TFIID	No Msn2/4 binding site
YIL129C	TAO3	TFIID	No Msn2/4 binding site
YDR454C	GUK1	TFIID	No Msn2/4 binding site
YDL027C	YDL027C	TFIID	No Msn2/4 binding site
YBR166C	TYR1	TFIID	No Msn2/4 binding site
YGL200C	EMP24	TFIID	Msn2/4 binding site
YOL158C	ENB1	CR	Msn2/4 binding site
YDR297W	SUR2	TFIID	No Msn2/4 binding site
YGL187C	COX4	TFIID	No Msn2/4 binding site
YDR301W	CFT1	TFIID	No Msn2/4 binding site
YGR084C	MRP13	TFIID	No Msn2/4 binding site
YHR197W	RIX1	TFIID	No Msn2/4 binding site
YNR053C	NOG2	TFIID	No Msn2/4 binding site
YGR008C	STF2	CR	Msn2/4 binding site
YKR030W	GMH1	TFIID	No Msn2/4 binding site
YLR254C	NDL1	TFIID	No Msn2/4 binding site
YDR017C	KCS1	TFIID	Msn2/4 binding site
YGL094C	PAN2	TFIID	No Msn2/4 binding site
YNL261W	ORC5	TFIID	No Msn2/4 binding site
YBR281C	DUG2	TFIID	No Msn2/4 binding site
YLR166C	SEC10	TFIID	Msn2/4 binding site
YEL056W	HAT2	TFIID	No Msn2/4 binding site
YJL165C	HAL5	TFIID	Msn2/4 binding site
YOR109W	INP53	TFIID	No Msn2/4 binding site
YJL005W	CYR1	TFIID	Msn2/4 binding site
YPL020C	ULP1	TFIID	No Msn2/4 binding site
YMR001C	CDC5	TFIID	No Msn2/4 binding site
YOR035C	SHE4	TFIID	No Msn2/4 binding site
YCL045C	EMC1	TFIID	No Msn2/4 binding site
YKL186C	MTR2	TFIID	No Msn2/4 binding site
YPL070W	MUK1	TFIID	No Msn2/4 binding site
YKR002W	PAP1	TFIID	No Msn2/4 binding site
YBR267W	REI1	TFIID	No Msn2/4 binding site
YBL078C	ATG8	TFIID	No Msn2/4 binding site
YER175C	TMT1	TFIID	No Msn2/4 binding site
YNL027W	CRZ1	TFIID	Msn2/4 binding site
YKR018C	YKR018C	TFIID	Msn2/4 binding site
YIL026C	IRR1	TFIID	No Msn2/4 binding site
YBL045C	COR1	TFIID	No Msn2/4 binding site
YOR160W	MTR10	TFIID	No Msn2/4 binding site
YJR050W	ISY1	TFIID	No Msn2/4 binding site
YJL197W	UBP12	TFIID	No Msn2/4 binding site
YGR208W	SER2	TFIID	No Msn2/4 binding site
YCL057W	PRD1	TFIID	No Msn2/4 binding site
YKL130C	SHE2	TFIID	No Msn2/4 binding site
YER100W	UBC6	TFIID	No Msn2/4 binding site
YER035W	EDC2	CR	Msn2/4 binding site
YGR038W	ORM1	TFIID	No Msn2/4 binding site
YNL090W	RHO2	TFIID	No Msn2/4 binding site
YPR104C	FHL1	TFIID	No Msn2/4 binding site
YLR186W	EMG1	TFIID	No Msn2/4 binding site
YMR300C	ADE4	TFIID	No Msn2/4 binding site
YHR073W	OSH3	TFIID	No Msn2/4 binding site
YBR155W	CNS1	TFIID	No Msn2/4 binding site
YOL133W	HRT1	TFIID	No Msn2/4 binding site
YFL007W	BLM10	TFIID	No Msn2/4 binding site
YGL040C	HEM2	TFIID	No Msn2/4 binding site
YPR020W	ATP20	TFIID	No Msn2/4 binding site
YOR091W	TMA46	TFIID	No Msn2/4 binding site
YOR108W	LEU9	TFIID	No Msn2/4 binding site
YBR212W	NGR1	TFIID	Msn2/4 binding site
YOR217W	RFC1	TFIID	Msn2/4 binding site
YER146W	LSM5	TFIID	No Msn2/4 binding site
YPL057C	SUR1	CR	Msn2/4 binding site
YAL059W	ECM1	TFIID	Msn2/4 binding site
YOR132W	VPS17	TFIID	Msn2/4 binding site
YJR010C-A	SPC1	TFIID	No Msn2/4 binding site
YDL056W	MBP1	TFIID	No Msn2/4 binding site
YGR252W	GCN5	TFIID	No Msn2/4 binding site
YPL242C	IQG1	TFIID	No Msn2/4 binding site
YJR011C	YJR011C	TFIID	No Msn2/4 binding site
YKL128C	PMU1	TFIID	No Msn2/4 binding site
YCR067C	SED4	TFIID	No Msn2/4 binding site
YLR429W	CRN1	TFIID	No Msn2/4 binding site
YJL033W	HCA4	TFIID	No Msn2/4 binding site
YFR051C	RET2	TFIID	No Msn2/4 binding site
YJL198W	PHO90	TFIID	No Msn2/4 binding site
YEL053C	MAK10	TFIID	No Msn2/4 binding site
YBL032W	HEK2	TFIID	No Msn2/4 binding site
YLL001W	DNM1	TFIID	No Msn2/4 binding site
YIL125W	KGD1	TFIID	Msn2/4 binding site
YIL090W	ICE2	TFIID	No Msn2/4 binding site
YKR072C	SIS2	TFIID	No Msn2/4 binding site
YDR485C	VPS72	TFIID	No Msn2/4 binding site
YDR494W	RSM28	TFIID	No Msn2/4 binding site
YOR086C	TCB1	TFIID	No Msn2/4 binding site
YPR118W	MRI1	TFIID	No Msn2/4 binding site
YPR088C	SRP54	TFIID	No Msn2/4 binding site
YDR181C	SAS4	TFIID	No Msn2/4 binding site
YJR132W	NMD5	TFIID	No Msn2/4 binding site
YAL017W	PSK1	TFIID	No Msn2/4 binding site
YGL172W	NUP49	TFIID	No Msn2/4 binding site
YPR069C	SPE3	CR	No Msn2/4 binding site
YPL081W	RPS9A	TFIID	No Msn2/4 binding site
YMR261C	TPS3	TFIID	Msn2/4 binding site
YLR414C	PUN1	CR	Msn2/4 binding site
YNL147W	LSM7	TFIID	No Msn2/4 binding site
YHL027W	RIM101	TFIID	No Msn2/4 binding site
YER172C	BRR2	TFIID	No Msn2/4 binding site
YLR328W	NMA1	TFIID	No Msn2/4 binding site
YNL050C	YNL050C	TFIID	No Msn2/4 binding site
YNL051W	COG5	TFIID	Msn2/4 binding site
YNL288W	CAF40	TFIID	No Msn2/4 binding site
YNL182C	IPI3	TFIID	Msn2/4 binding site
YPL234C	VMA11	TFIID	No Msn2/4 binding site
YOR273C	TPO4	CR	Msn2/4 binding site
YBL097W	BRN1	TFIID	No Msn2/4 binding site
YNL238W	KEX2	TFIID	No Msn2/4 binding site
YDR098C	GRX3	TFIID	No Msn2/4 binding site
YLR096W	KIN2	TFIID	No Msn2/4 binding site
YOR119C	RIO1	TFIID	No Msn2/4 binding site
YNL199C	GCR2	TFIID	No Msn2/4 binding site
YJR062C	NTA1	TFIID	No Msn2/4 binding site
YOR211C	MGM1	TFIID	No Msn2/4 binding site
YFR041C	ERJ5	TFIID	No Msn2/4 binding site
YFR031C	SMC2	TFIID	Msn2/4 binding site
YKR064W	OAF3	TFIID	No Msn2/4 binding site
YOR171C	LCB4	TFIID	Msn2/4 binding site
YIL047C	SYG1	TFIID	No Msn2/4 binding site
YPL266W	DIM1	TFIID	No Msn2/4 binding site
YEL036C	ANP1	TFIID	No Msn2/4 binding site
YMR071C	TVP18	TFIID	Msn2/4 binding site
YKL008C	LAC1	CR	No Msn2/4 binding site
YIL147C	SLN1	TFIID	No Msn2/4 binding site
YLR095C	IOC2	TFIID	No Msn2/4 binding site
YPL163C	SVS1	CR	No Msn2/4 binding site
YLR367W	RPS22B	TFIID	No Msn2/4 binding site
YNL330C	RPD3	TFIID	No Msn2/4 binding site
YML071C	COG8	TFIID	No Msn2/4 binding site
YBR234C	ARC40	TFIID	No Msn2/4 binding site
YHR181W	SVP26	TFIID	No Msn2/4 binding site
YMR296C	LCB1	TFIID	No Msn2/4 binding site
YLR073C	RFU1	TFIID	No Msn2/4 binding site
YPR034W	ARP7	TFIID	No Msn2/4 binding site
YJL011C	RPC17	TFIID	No Msn2/4 binding site
YAR007C	RFA1	TFIID	No Msn2/4 binding site
YNL062C	GCD10	TFIID	Msn2/4 binding site
YGL129C	RSM23	TFIID	No Msn2/4 binding site
YGL111W	NSA1	TFIID	No Msn2/4 binding site
YLR278C	YLR278C	TFIID	No Msn2/4 binding site
YMR304W	UBP15	TFIID	No Msn2/4 binding site
YGR063C	SPT4	TFIID	No Msn2/4 binding site
YDR216W	ADR1	TFIID	No Msn2/4 binding site
YGL178W	MPT5	TFIID	No Msn2/4 binding site
YHR165C	PRP8	TFIID	No Msn2/4 binding site
YLR138W	NHA1	TFIID	Msn2/4 binding site
YOL032W	OPI10	TFIID	No Msn2/4 binding site
YMR117C	SPC24	TFIID	No Msn2/4 binding site
YBL040C	ERD2	TFIID	No Msn2/4 binding site
YER111C	SWI4	TFIID	No Msn2/4 binding site
YLR454W	FMP27	TFIID	No Msn2/4 binding site
YBR073W	RDH54	TFIID	No Msn2/4 binding site
YHR118C	ORC6	TFIID	No Msn2/4 binding site
YLR120C	YPS1	TFIID	No Msn2/4 binding site
YOL013C	HRD1	TFIID	No Msn2/4 binding site
YMR061W	RNA14	TFIID	No Msn2/4 binding site
YHR146W	CRP1	TFIID	No Msn2/4 binding site
YBL107C	MIX23	TFIID	No Msn2/4 binding site
YDR159W	SAC3	TFIID	No Msn2/4 binding site
YCR065W	HCM1	CR	No Msn2/4 binding site
YGR147C	NAT2	TFIID	No Msn2/4 binding site
YOR150W	MRPL23	TFIID	No Msn2/4 binding site
YGL041W-A	YGL041W-A	TFIID	No Msn2/4 binding site
YMR145C	NDE1	CR	No Msn2/4 binding site
YML100W	TSL1	CR	Msn2/4 binding site
YCR069W	CPR4	TFIID	No Msn2/4 binding site
YPL116W	HOS3	TFIID	No Msn2/4 binding site
YKL010C	UFD4	TFIID	No Msn2/4 binding site
YBR015C	MNN2	TFIID	No Msn2/4 binding site
YCR107W	AAD3	TFIID	No Msn2/4 binding site
YJR143C	PMT4	TFIID	No Msn2/4 binding site
YPR073C	LTP1	TFIID	No Msn2/4 binding site
YBL090W	MRP21	TFIID	Msn2/4 binding site
YMR016C	SOK2	TFIID	No Msn2/4 binding site
YNL111C	CYB5	TFIID	No Msn2/4 binding site
YGR081C	SLX9	TFIID	No Msn2/4 binding site
YBR095C	RXT2	TFIID	No Msn2/4 binding site
YDR498C	SEC20	TFIID	No Msn2/4 binding site
YPR141C	KAR3	TFIID	No Msn2/4 binding site
YNR013C	PHO91	TFIID	No Msn2/4 binding site
YML125C	PGA3	TFIID	No Msn2/4 binding site
YGL049C	TIF4632	TFIID	Msn2/4 binding site
YLR226W	BUR2	TFIID	Msn2/4 binding site
YCL001W	RER1	TFIID	No Msn2/4 binding site
YPL203W	TPK2	TFIID	Msn2/4 binding site
YHR200W	RPN10	TFIID	No Msn2/4 binding site
YDR481C	PHO8	TFIID	Msn2/4 binding site
YER029C	SMB1	TFIID	No Msn2/4 binding site
YGL125W	MET13	CR	No Msn2/4 binding site
YDL236W	PHO13	TFIID	No Msn2/4 binding site
YCL017C	NFS1	TFIID	No Msn2/4 binding site
YKR074W	AIM29	TFIID	Msn2/4 binding site
YLR327C	TMA10	CR	Msn2/4 binding site
YDL166C	FAP7	TFIID	No Msn2/4 binding site
YBR023C	CHS3	TFIID	No Msn2/4 binding site
YHL038C	CBP2	TFIID	No Msn2/4 binding site
YLR373C	VID22	TFIID	No Msn2/4 binding site
YHR029C	YHI9	TFIID	No Msn2/4 binding site
YHL039W	EFM1	TFIID	No Msn2/4 binding site
YDR093W	DNF2	TFIID	No Msn2/4 binding site
YBL017C	PEP1	TFIID	Msn2/4 binding site
YLR069C	MEF1	TFIID	No Msn2/4 binding site
YHR056C	RSC30	TFIID	No Msn2/4 binding site
YNL207W	RIO2	TFIID	No Msn2/4 binding site
YJR054W	KCH1	TFIID	No Msn2/4 binding site
YML110C	COQ5	TFIID	No Msn2/4 binding site
YGR136W	LSB1	CR	Msn2/4 binding site
YPR191W	QCR2	TFIID	No Msn2/4 binding site
YGL073W	HSF1	TFIID	No Msn2/4 binding site
YPL188W	POS5	TFIID	No Msn2/4 binding site
YGR210C	YGR210C	TFIID	No Msn2/4 binding site
YHR063C	PAN5	TFIID	No Msn2/4 binding site
YML032C	RAD52	TFIID	No Msn2/4 binding site
YKR006C	MRPL13	TFIID	No Msn2/4 binding site
YDR012W	RPL4B	TFIID	No Msn2/4 binding site
YNR006W	VPS27	TFIID	No Msn2/4 binding site
YOR230W	WTM1	CR	Msn2/4 binding site
YLR419W	YLR419W	TFIID	No Msn2/4 binding site
YCR043C	YCR043C	TFIID	No Msn2/4 binding site
YJL072C	PSF2	TFIID	No Msn2/4 binding site
YIL151C	ESL1	TFIID	No Msn2/4 binding site
YOL062C	APM4	TFIID	Msn2/4 binding site
YML081W	TDA9	TFIID	No Msn2/4 binding site
YIL063C	YRB2	TFIID	No Msn2/4 binding site
YDR524C	AGE1	TFIID	No Msn2/4 binding site
YKL023W	YKL023W	TFIID	Msn2/4 binding site
YOR299W	BUD7	TFIID	No Msn2/4 binding site
YPR115W	RGC1	TFIID	No Msn2/4 binding site
YDR244W	PEX5	TFIID	No Msn2/4 binding site
YIL008W	URM1	TFIID	No Msn2/4 binding site
YGL036W	YGL036W	TFIID	Msn2/4 binding site
YDR531W	CAB1	TFIID	No Msn2/4 binding site
YBL005W	PDR3	TFIID	No Msn2/4 binding site
YPR055W	SEC8	TFIID	No Msn2/4 binding site
[truncated: 2,901 more rows]
