# Supplementary material for: Two roles for the yeast transcription coactivator SAGA and a set of genes redundantly regulated by TFIID and SAGA
Source: eLife. 2020 Jan 8;9:e50109. doi: 10.7554/eLife.50109 (PMC6977968; doi:10.7554/eLife.50109)
Supplement: Figure 5—source data 1. — Data was used to make graphs in Figure 5AB. [file elife-50109-fig5-data1.xlsx]

## Sheet: Fig 5A
Western blot quantitation raw data
Donczew et al									Histone marks normalized to Tfg2
									averages of A + B samples, two volumes loaded for each
A samples		% WT	% WT	normalized	% WT	% WT	normalized		averages
	ul extract	H3Ac	Tfg2	H3Ac/Tfg2	H2BUb	Tfg2	H2BUb/Tfg2			H3K18-Ac	H2B-Ub
WT	12	100	100	1	100	100	1		WT	1	1
	6	50	50	1	50	50	1		spt3-del	0.701668	0.161184
	3	25	25	1	25	25	1		spt20-del	0.34915	0.289136
	1.5	12.5	12.5	1	12.5	12.5	1		spt7-del	0.343064	0.282031
spt3-del	12	97.2	109	0.891743	14.4	135	0.106667		gcn5-del	0.182417	0.634115
	6	37.1	60.3	0.615257	8.42	60.6	0.138944		ubp8-del	1.02031	4.82171
spt20-del	12	43.1	142	0.303521	31.9	210	0.151905		SEM
	6	16.9	62.9	0.26868	18.6	74.3	0.250336			H3Ac	H2BUb
spt7-del	12	40.6	126	0.322222	27.6	151	0.182781		WT	0	0
	6	17	69.2	0.245665	15.5	63.7	0.243328		spt3-del	0.0677205	0.0262937
gcn5-del	12	13	94.8	0.137131	45.3	124	0.365323		spt20-del	0.0384901	0.0555937
	6	8.31	47.9	0.173486	27.1	62.8	0.431529		spt7-del	0.0406456	0.0423167
ubp8-del	6	44.2	47.8	0.924686	207	42.7	4.84778		gcn5-del	0.0173731	0.150177
	3	20	20.8	0.961538	83.7	20.5	4.08293		ubp8-del	0.0733267	0.323357
B samples		% WT	% WT	normalized	% WT	% WT	normalized
	ul extract	H3Ac	Tfg2	H3Ac/Tfg2	H2BUb	Tfg2	H2BUb/Tfg2
WT	12	100	100	1	100	100	1
	6	50	50	1	50	50	1
	3	25	25	1	25	25	1
	1.5	12.5	12.5	1	12.5	12.5	1
spt3-del	12	71.9	102	0.704902	27.4	119	0.230252
	6	36.4	61.2	0.594771	10.2	60.4	0.168874
spt20-del	12	53.8	123	0.437398	50.7	144	0.352083
	6	26.2	67.7	0.387001	29	72.1	0.402219
spt7-del	12	50.2	114	0.440351	44	132	0.333333
	6	26.1	71.7	0.364017	29.9	81.1	0.368681
gcn5-del	12	19.8	96	0.20625	89	124	0.717742
	6	12.3	57.8	0.212803	51.4	50.3	1.02187
ubp8-del	6	56	45.2	1.23894	298	52.7	5.65465
	3	28.3	29.6	0.956081	126	26.8	4.70149

## Sheet: Fig 5B - H3Ac
Western blot quantitation raw data
Donczew et al
A samples	time after	%
	3IAA addition	AcH3 Lys18	Tfg2	AcH3/Tfg2
WT +DMSO	0	100	100				Averages of A and B replicates
	0	50	50						T=0 set to 1
	0	25	25						Averages	SEM
	0	12.5	12.5						AcH3/Tfg2	AcH3/Tfg2
					T=0 set to 1		WT +DMSO	0	1	0
WT +DMSO	0	108	105	1.02857	1			30'	0.950122	0.0406184
	30'	107	105	1.01905	0.990741			2h	1.1349	0.0616812
	2h	128	104	1.23077	1.19658			6h	1.56398	0.049336
	6h	83.8	50.5	1.65941	1.61331
							WT +3IAA	0	1	0
WT +3IAA	30'	96.8	95	1.01895	0.990643			30'	0.905809	0.084834
	2h	107	89.5	1.19553	1.16232			2h	1.16615	0.00383142
	6h	62.5	42.2	1.48104	1.4399			6h	1.3933	0.0466
Spt3/20-deg	0	61.4	136	0.451471	1		Spt3/20-deg	0	1	0
	30'	59.8	224	0.266964	0.591322			30'	0.737157	0.145835
	2h	44.1	154	0.286364	0.634291			2h	0.67217	0.0378793
	6h	29.8	136	0.219118	0.485342			6h	0.517234	0.0318923
Spt3/7-deg	0	111	137	0.810219	1		Spt3/7-deg	0	1	0
	30'	107	145	0.737931	0.91078			30'	1.03116	0.120378
	2h	57.9	102	0.567647	0.700609			2h	0.625266	0.0753437
	6h	36.7	87.7	0.418472	0.516493			6h	0.459835	0.0566572
B samples	time after
	3IAA addition	AcH3 Lys18	Tfg2	AcH3/Tfg2
WT +DMSO	0	100	100
	0	50	50
	0	25	25
	0	12.5	12.5
					T=0 set to 1
WT +DMSO	0	92.4	109	0.847706	1
	30'	101	131	0.770992	0.909504
	2h	121	133	0.909774	1.07322
	6h	84.1	65.5	1.28397	1.51464
WT +3IAA	30'	103	148	0.695946	0.820975
	2h	121	122	0.991803	1.16998
	6h	65.3	57.2	1.14161	1.3467
Spt3/20-deg	0	91.6	101	0.906931	1
	30'	98.5	123	0.800813	0.882993
	2h	74.7	116	0.643966	0.710049
	6h	50.3	101	0.49802	0.549127
Spt3/7-deg	0	162	124	1.30645	1
	30'	170	113	1.50442	1.15154
	2h	74	103	0.718447	0.549922
	6h	53.2	101	0.526733	0.403178

## Sheet: Fig 5B - H2BUb
Western blot quantitation raw data
Donczew et al
A samples	time after	%
	3IAA addition	H2B Ub K120	Tfg2	H2BUb/Tfg2
WT +DMSO	0	100	100				Averages of A and B replicates
	0	50	50						T=0 set to 1
	0	25	25						Averages	SEM
	0	12.5	12.5						H2BUb/Tfg2	H2BUb/Tfg2
					T=0 set to 1		WT +DMSO	0	1	0
WT +DMSO	0	90.4	86.8	1.04147	1			30'	1.80407	0.138456
	30'	170	98	1.73469	1.66561			2h	1.14813	0.0782396
	2h	129	101	1.27723	1.22636			6h	0.504725	0.13617
	6h	27.5	41.2	0.667476	0.640895
							WT +3IAA	0	1	0
WT +3IAA	30'	156	92.5	1.68649	1.61933			30'	1.60605	0.0132753
	2h	129	85.5	1.50877	1.44869			2h	1.44888	0.000195761
	6h	52.6	32.8	1.60366	1.5398			6h	1.40778	0.132021
Spt3/20-deg	0	73.3	81.9	0.894994	1		Spt3/20-deg	0	1	0
	30'	73.8	94.1	0.784272	0.876288			30'	0.971798	0.0955099
	2h	31.7	76.4	0.414921	0.463603			2h	0.526107	0.0625048
	6h	63.2	75.7	0.834875	0.932827			6h	1.08172	0.148891
Spt3/7-deg	0	43.2	81.8	0.528117	1		Spt3/7-deg	0	1	0
	30'	60.4	90.1	0.670366	1.26935			30'	1.39842	0.129069
	2h	43.3	80	0.54125	1.02487			2h	1.07687	0.0520019
	6h	73.1	76.2	0.959318	1.81649			6h	2.43216	0.61567
B samples	time after
	3IAA addition	H2B Ub K120	Tfg2	H2BUb/Tfg2
WT +DMSO	0	100	100
	0	50	50
	0	25	25
	0	12.5	12.5
					T=0 set to 1
WT +DMSO	0	123	88.7	1.3867	1
	30'	299	111	2.69369	1.94253
	2h	181	122	1.48361	1.06989
	6h	30	58.7	0.511073	0.368554
WT +3IAA	30'	254	115	2.2087	1.59277
	2h	213	106	2.00943	1.44908
	6h	92.7	52.4	1.76908	1.27575
Spt3/20-deg	0	85.3	102	0.836275	1
	30'	108	121	0.892562	1.06731
	2h	57.1	116	0.492241	0.588612
	6h	106	103	1.02913	1.23061
Spt3/7-deg	0	32.4	134	0.241791	1
	30'	55.4	150	0.369333	1.52749
	2h	33.3	122	0.272951	1.12887
	6h	81.8	111	0.736937	3.04783
