# Supplementary material for: Two roles for the yeast transcription coactivator SAGA and a set of genes redundantly regulated by TFIID and SAGA
Source: eLife. 2020 Jan 8;9:e50109. doi: 10.7554/eLife.50109 (PMC6977968; doi:10.7554/eLife.50109)
Supplement: Figure 7—source data 1. [file elife-50109-fig7-data1.xlsx]

## Sheet: Sheet1
Donczew et al.
Source Data for Figure 5
	Figure 5A										Figure 5B
			raw data from RT-qPCR, ng										raw data from RT-qPCR, ng
			tubulin	ACT1	RPS5	SSH1	ARG3	HIS4	ARG5				tubulin	ACT1	RPS5	SSH1	ARG3	HIS4	ARG5
	1B	WT -SM	0.119146	5.45561	6.39951	1.90013	0.965921	2.74535	3.29632		11B	Spt3/7-deg SM, -3IAA	0.266626	6.884	13.5086	3.318	8.99086	15.0539	11.0937
	2B	WT -SM	0.146128	6.08006	7.68529	2.24683	1.16516	3.15328	3.5632		12B	Spt3/7-deg SM, -3IAA	0.322397	7.31617	12.9636	3.67052	8.84877	13.0178	12.8222
	1A	WT +SM	0.103387	4.90902	8.54949	2.36295	3.0559	5.91151	7.20032		11A	Spt3/7-deg SM, +3IAA	0.352116	10.4842	14.2229	4.48582	5.44318	12.4802	5.93726
	2A	WT +SM	0.180027	7.62788	11.703	3.03209	5.61648	9.96191	11.4992		12A	Spt3/7-deg SM, +3IAA	0.333761	7.56893	12.0333	3.94743	4.41867	9.35033	5.87438
	5B	spt7_del -SM	0.247146	4.06341	4.70311	1.5783	0.444137	0.870474	1.05081		9B	Spt3/7-deg 3IAA, -SM	0.221948	8.10207	10.8192	3.20694	0.567141	1.81859	1.45822
	6B	spt7_del -SM	0.330395	4.21389	6.1301	1.42285	0.785759	1.01679	1.17628		10B	Spt3/7-deg 3IAA, -SM	0.247181	7.76475	10.7677	3.23767	0.750103	2.02449	1.86852
	5A	spt7_del +SM	0.448999	6.74178	7.63713	2.43798	2.71249	4.39251	3.56263		9A	Spt3/7-deg 3IAA, +SM	0.373702	11.0628	13.9987	4.27316	7.10171	21.3156	10.1757
	6A	spt7_del +SM	0.471419	5.75227	7.76116	2.05669	2.05832	2.83476	2.45037		10A	Spt3/7-deg 3IAA, +SM	0.377027	9.27406	12.884	4.08908	7.43007	19.7332	8.92464
	7B	spt3_del -SM	0.359195	3.79163	6.74351	1.49664	1.27188	4.47704	3.0676
	8B	spt3_del -SM	0.290765	4.67604	7.07578	1.87953	1.42253	4.96303	3.77874					normalized to tubulin
	7A	spt3_del +SM	0.491365	5.65132	9.90657	2.23915	1.82103	6.47004	4.38431					ACT1	RPS5	SSH1	ARG3	HIS4	ARG5
	8A	spt3_del +SM	0.437552	5.59055	10.1446	2.12386	1.7345	5.63374	4.25299			11B	Spt3/7-deg SM, -3IAA	25.8189	50.6648	12.4444	33.7209	56.4607	41.6078
												12B	Spt3/7-deg SM, -3IAA	22.693	40.2099	11.3851	27.4468	40.3783	39.7714
				normalized to tubulin								11A	Spt3/7-deg SM, +3IAA	29.7749	40.3928	12.7396	15.4585	35.4435	16.8617
				ACT1	RPS5	SSH1	ARG3	HIS4	ARG5			12A	Spt3/7-deg SM, +3IAA	22.6777	36.0535	11.8271	13.239	28.015	17.6005
		1B	WT -SM	45.7894	53.7116	15.9479	8.10705	23.0419	27.6663			9B	Spt3/7-deg 3IAA, -SM	36.5044	48.7465	14.449	2.55529	8.19375	6.57008
		2B	WT -SM	41.6079	52.593	15.3758	7.9736	21.5789	24.3842			10B	Spt3/7-deg 3IAA, -SM	31.4132	43.5619	13.0984	3.03463	8.19031	7.5593
		1A	WT +SM	47.482	82.694	22.8554	29.5579	57.1785	69.6443			9A	Spt3/7-deg 3IAA, +SM	29.6033	37.4595	11.4347	19.0037	57.0391	27.2294
		2A	WT +SM	42.3707	65.0068	16.8424	31.1979	55.3356	63.8748			10A	Spt3/7-deg 3IAA, +SM	24.5979	34.1726	10.8456	19.707	52.3389	23.6711
		5B	spt7_del -SM	16.4413	19.0297	6.38609	1.79706	3.5221	4.25178
		6B	spt7_del -SM	12.7541	18.5538	4.30652	2.37824	3.07749	3.56023			11B, 12B	Spt3/7-deg SM, -3IAA average =	24.256	45.4374	11.9147	30.5838	48.4195	40.6896
		5A	spt7_del +SM	15.0151	17.0092	5.4298	6.04121	9.78289	7.93461
		6A	spt7_del +SM	12.202	16.4634	4.36276	4.36623	6.01324	5.19785					Spt3/7-deg SM, +3IAA set to 1
		7B	spt3_del -SM	10.5559	18.774	4.16665	3.54093	12.4641	8.54021					ACT1	RPS5	SSH1	ARG3	HIS4	ARG5
		8B	spt3_del -SM	16.0819	24.3351	6.46411	4.89238	17.0689	12.9959			11B	Spt3/7-deg SM, -3IAA	1.06444	1.11505	1.04446	1.10257	1.16607	1.02257
		7A	spt3_del +SM	11.5013	20.1613	4.557	3.70606	13.1675	8.92272			12B	Spt3/7-deg SM, -3IAA	0.935564	0.884953	0.955544	0.897428	0.833926	0.977434
		8A	spt3_del +SM	12.7769	23.1849	4.85395	3.96409	12.8756	9.71997			11A	Spt3/7-deg SM, +3IAA	1.22753	0.888977	1.06923	0.505446	0.732009	0.414397
												12A	Spt3/7-deg SM, +3IAA	0.934931	0.793476	0.992645	0.432876	0.57859	0.432556
		1A, 2A	WT +SM average =	44.9263	73.8504	19.8489	30.3779	56.257	66.7596			9B	Spt3/7-deg 3IAA, -SM	1.50496	1.07283	1.2127	0.0835502	0.169224	0.161468
												10B	Spt3/7-deg 3IAA, -SM	1.29507	0.958725	1.09934	0.0992232	0.169153	0.18578
				WT +SM set to 1								9A	Spt3/7-deg 3IAA, +SM	1.22046	0.82442	0.959708	0.621363	1.17802	0.669199
				ACT1	RPS5	SSH1	ARG3	HIS4	ARG5			10A	Spt3/7-deg 3IAA, +SM	1.0141	0.752081	0.910267	0.64436	1.08095	0.581748
		1B	WT -SM	1.01921	0.727302	0.803466	0.266873	0.409583	0.414417
		2B	WT -SM	0.926137	0.712155	0.774643	0.26248	0.383577	0.365254					average of WT = 1.0
		1A	WT +SM	1.05689	1.11975	1.15147	0.973007	1.01638	1.04321					ACT1	RPS5	SSH1	ARG3	HIS4	ARG5
		2A	WT +SM	0.943114	0.88025	0.84853	1.02699	0.98362	0.956789				Spt3/7-deg SM, -3IAA	1	1	1	1	1	1
		5B	spt7_del -SM	0.365962	0.257678	0.321735	0.0591569	0.0626073	0.063688				Spt3/7-deg SM, +3IAA	1.08123	0.841227	1.03094	0.469161	0.6553	0.423477
		6B	spt7_del -SM	0.28389	0.251235	0.216965	0.0782886	0.0547041	0.0533292				Spt3/7-deg 3IAA, -SM	1.40002	1.01578	1.15602	0.0913867	0.169189	0.173624
		5A	spt7_del +SM	0.334217	0.23032	0.273557	0.198868	0.173896	0.118854				Spt3/7-deg 3IAA, +SM	1.11728	0.78825	0.934988	0.632861	1.12948	0.625474
		6A	spt7_del +SM	0.271601	0.222929	0.219799	0.14373	0.106889	0.0778593
		7B	spt3_del -SM	0.234961	0.254216	0.209918	0.116563	0.221557	0.127925					SEM for WT = 1.0
		8B	spt3_del -SM	0.357961	0.329518	0.325665	0.161051	0.303409	0.194667					ACT1	RPS5	SSH1	ARG3	HIS4	ARG5
		7A	spt3_del +SM	0.256003	0.273002	0.229584	0.121998	0.23406	0.133654				Spt3/7-deg SM, -3IAA	0.064436	0.115047	0.0444556	0.102572	0.166074	0.0225662
		8A	spt3_del +SM	0.284397	0.313944	0.244545	0.130493	0.228871	0.145597				Spt3/7-deg SM, +3IAA	0.146298	0.0477502	0.0382931	0.036285	0.0767095	0.00907942
													Spt3/7-deg 3IAA, -SM	0.104947	0.0570522	0.0566808	0.00783651	3.54746e-05	0.0121557
				average of WT = 1.0									Spt3/7-deg 3IAA, +SM	0.10318	0.0361695	0.0247208	0.0114983	0.0485364	0.0437253
				ACT1	RPS5	SSH1	ARG3	HIS4	ARG5
			WT -SM	0.972673	0.719729	0.789055	0.264677	0.39658	0.389835
			WT +SM	1	1	1	1	1	1
			spt7_del -SM	0.324926	0.254457	0.26935	0.0687228	0.0586557	0.0585086
			spt7_del +SM	0.302909	0.226624	0.246678	0.171299	0.140393	0.0983564
			spt3_del -SM	0.296461	0.291867	0.267792	0.138807	0.262483	0.161296
			spt3_del +SM	0.2702	0.293473	0.237065	0.126246	0.231465	0.139626
				SEM for WT = 1.0
				ACT1	RPS5	SSH1	ARG3	HIS4	ARG5
			WT -SM	0.0465368	0.00757334	0.0144113	0.00219656	0.0130028	0.0245818
			WT +SM	0.0568859	0.11975	0.15147	0.0269933	0.0163796	0.0432108
			spt7_del -SM	0.0410364	0.00322142	0.052385	0.00956581	0.00395163	0.00517942
			spt7_del +SM	0.0313082	0.00369569	0.026879	0.0275691	0.0335038	0.0204971
			spt3_del -SM	0.0615002	0.037651	0.0578735	0.0222439	0.040926	0.033371
			spt3_del +SM	0.0141969	0.020471	0.00748024	0.00424714	0.0025944	0.00597105
