# Supplementary material for: Two roles for the yeast transcription coactivator SAGA and a set of genes redundantly regulated by TFIID and SAGA
Source: eLife. 2020 Jan 8;9:e50109. doi: 10.7554/eLife.50109 (PMC6977968; doi:10.7554/eLife.50109)
Supplement: Supplementary file 1. — Expression column is the average signal for all DMSO and WT samples. This value was further normalized by the gene length to give normalized expression which was used to sort the genes from the highest to the lowest expression. [file elife-50109-supp1.xlsx]

## Sheet: Supp. File 1
gene_id	gene_name	gene_length	expression	expression_normalized	expression_rank	Spt3_20_GC_A_IAA	Spt3_20_GC_A_DMSO	Spt3_20_GC_B_IAA	Spt3_20_GC_B_DMSO	Spt3_20_GC_C_IAA	Spt3_20_GC_C_DMSO	Spt3_7_GC_A_IAA	Spt3_7_GC_A_DMSO	Spt3_7_GC_B_IAA	Spt3_7_GC_B_DMSO	Spt3_7_GC_C_IAA	Spt3_7_GC_C_DMSO	Spt3_7_YPD_A_IAA	Spt3_7_YPD_A_DMSO	Spt3_7_YPD_B_IAA	Spt3_7_YPD_B_DMSO	Spt3_7_YPD_C_IAA	Spt3_7_YPD_C_DMSO	Taf13_GC_A_IAA	Taf13_GC_A_DMSO	Taf13_GC_B_IAA	Taf13_GC_B_DMSO	WT_565_GC_A	WT_565_GC_B	WT_4705_GC_A	WT_4705_GC_B	WT_4705_GC_C	spt20_del_GC_A	spt20_del_GC_B	spt20_del_GC_C	spt3_del_GC_A	spt3_del_GC_B	spt3_del_GC_C	spt7_del_GC_A	spt7_del_GC_B	spt7_del_GC_C	Taf13_YPD_A_DMSO	Taf13_YPD_A_IAA	Taf13_YPD_B_DMSO	Taf13_YPD_B_IAA	Taf1_YPD_A_DMSO	Taf1_YPD_A_IAA	Taf1_YPD_B_DMSO	Taf1_YPD_B_IAA
YPR036W-A	SPO24	203	325.94	1605.62	1	425.393	716.338	368.075	573.551	551.572	529.272	616.662	616.841	567.966	484.678	367.315	582.623	337.784	266.631	346.38	275.141	372.952	299.725	494.298	402.027	449.021	418.813	446.682	279.787	249.007	287.975	206.712	157.373	169.723	145.966	133.183	121.991	142.48	122.241	101.122	106.209	96.7796	66.3563	82.6964	79.4609	109.367	118.136	94.5232	144.42
YLR109W	AHP1	530	388.382	732.796	2	277.754	805.438	221.045	594.442	291.507	593.721	489.79	564.509	340.989	380.409	279.186	494.031	348.69	497.742	335.174	476.912	360.736	533.472	382.886	567.069	363.585	606.921	470.497	309.386	353.104	334.292	252.853	40.4466	39.7137	37.6655	78.2351	68.8758	67.0512	31.3707	21.7908	20.0082	139.986	64.9624	96.0026	56.9241	146.868	110.743	125.368	112.34
YHR179W	OYE2	1202	829.7	690.266	3	779.39	1562.95	625.627	1129.56	669.247	1185.9	984.625	1176.12	746.241	1014.56	712.918	950.454	642.949	886.379	570.987	863.911	598.512	908.378	745.138	1058.52	606.124	1039.11	1074.5	897.711	812.19	701.764	583.506	290.438	259.96	245.504	352.272	307.75	349.768	224.43	167.507	140.659	480.376	299.867	303.11	173.564	520.738	400.282	352.96	278.694
YGR209C	TRX2	314	189.893	604.756	4	106.535	240.709	88.3011	214.758	123.945	205.196	207.677	304.302	140.57	255.802	124.885	278.229	108.566	237.722	98.7674	207.994	104.516	207.32	389.544	310.04	338.425	315.547	179.413	156.474	212.737	186.517	172.999	56.3223	54.4546	50.0109	40.0327	33.93	34.0698	49.3361	39.266	36.6692	112.802	90.111	64.5149	50.7077	97.0158	113.805	74.4393	80.1659
YOL151W	GRE2	1028	565.647	550.24	5	329.391	989.428	276.766	797.413	280.057	839.86	517.579	834.892	311.439	698.83	402.175	753.919	334.542	722.722	276.866	659.848	319.616	719.74	606.105	692.466	479.294	684.605	556.255	523.191	658.532	457.614	467.237	79.0488	80.5258	72.8135	116.71	100.919	107.355	88.9477	65.8519	46.5228	292.422	182.081	168.215	113.865	278.547	228.94	206.514	185.312
YGR192C	TDH3	998	548.945	550.045	6	554.297	999.4	450.862	778.534	522.585	738.322	515.512	678.671	366.126	554.629	353.187	563.02	605.909	768.912	504.448	708.244	580.467	685.84	607.753	784.231	507.996	749.498	874.978	599.096	409.182	388.761	311.311	162.643	148.218	127.811	108.299	78.9474	91.7873	106.529	87.7492	70.3296	281.608	220.471	191.309	132.087	317.592	284.435	228.403	267.517
YOL109W	ZEO1	341	184.996	542.509	7	78.0136	302.683	50.4578	223.766	68.5149	185.447	138.782	363.224	67.4796	146.32	79.1384	298.505	137.157	300.636	150.829	315.512	149.947	386.571	203.639	226.961	179.438	303.695	162.385	139.003	142.082	161.68	131.397	45.7824	48.2692	42.2648	21.0678	19.3595	19.459	38.2382	21.8973	24.1828	63.3458	40.8883	33.797	22.0059	59.8629	55.8663	35.7825	38.4543
YLR110C	CCW12	401	175.04	436.509	8	153.417	314.584	121.299	208.146	161.837	278.605	141.925	182	140.57	199.6	108.8	150.262	141.775	209.291	123.459	203.654	154.738	209.689	159.8	256.028	145.398	203.246	245.058	172.249	157.173	145.09	106.76	44.7284	46.1882	42.2164	38.7866	33.6688	40.9299	34.1726	24.8809	15.2318	115.183	97.6324	84.8591	58.0544	130.932	99.0807	90.2485	90.2657
YDL184C	RPL41A	77	32.5653	422.926	9	49.8653	57.2556	35.0865	39.9617	48.8873	46.5304	56.2406	49.9094	45.1859	43.5408	50.9446	40.5523	51.9743	39.8194	47.8962	40.6161	48.3057	43.8333	12.4596	39.98	10.3151	46.7043	36.5243	31.1252	29.411	27.3303	23.4483	25.4274	20.9841	27.2567	22.7813	18.4307	25.2968	19.7234	17.049	14.2916	21.231	16.2043	7.99106	3.81892	19.4729	7.73343	8.88113	3.67906
YDL133C-A	RPL41B	77	32.3963	420.731	10	44.1797	41.0653	28.1528	27.9828	41.527	39.2089	59.1354	58.4376	46.3829	42.9106	43.9726	49.218	52.1708	46.9869	50.6728	43.3184	42.8763	47.1139	17.6017	33.4094	11.2121	45.4135	27.5166	25.1885	28.8965	34.043	29.1753	28.7211	23.7589	25.7074	19.5101	19.6788	24.3733	26.1514	19.8728	17.9397	22.5703	20.8797	8.65087	4.29842	24.9512	8.29023	8.25466	3.37442
YDR524C-B	YDR524C-B	202	82.6538	409.177	11	68.0405	146.784	66.748	101.294	70.2414	138.243	62.3609	81.5025	56.7068	81.639	57.0604	70.9244	51.0901	83.2225	43.6322	78.0386	50.5413	74.635	75.6807	120.497	67.7209	98.5719	112.534	92.0186	95.9502	84.6759	70.8852	36.2307	38.9044	37.4719	41.6683	35.9617	40.6661	36.9746	35.1636	21.663	56.1034	38.4199	40.0652	27.1434	61.4566	47.0192	48.275	43.4457
YGL008C	PMA1	2756	1125.73	408.467	12	445.992	1445.11	393.303	1281.36	394.642	1214.51	500.873	943.627	525.997	882.045	371.473	835.023	509.525	1137.16	453.676	1060.52	480.263	1112.96	625.157	1250.96	416.685	1216.19	1794.63	1343.13	1021.07	1013.23	876.772	345.97	332.624	243.761	262.588	161.697	237.796	223.111	169.904	118.056	1117.55	751.496	817.727	436.59	1271.71	919.906	1008.65	736.702
YPL240C	HSP82	2129	847.771	398.202	13	876.045	1548.9	690.286	1201.82	541.304	785.623	873.053	1078.91	236.104	519.568	552.195	808.605	1132.23	1694.63	1005.23	1580.02	1138.74	1638.87	348.738	1153.07	458.529	1320.39	894.968	671.778	474.949	401.227	432.443	105.135	75.2653	54.949	101.406	45.7431	54.6502	61.8074	57.4339	51.5625	461.427	135.965	328	88.5373	445.187	127.385	424.673	149.716
YMR186W	HSC82	2117	812.365	383.734	14	934.206	1488.65	783.265	1259.32	711.41	953.248	869.745	971.246	423.132	589.863	583.264	779.747	988.495	1278.2	890.394	1192.85	939.686	1180.31	430.681	1020.55	454.358	1136.98	1025.15	749.294	556.58	537.208	497.925	295.511	238.167	200.189	201.527	128.144	148.812	193.279	165.003	138.026	538.414	264.961	348.784	139.827	517.849	239.489	412.549	197.943
YBR244W	GPX2	488	184.859	378.81	15	96.8412	281.882	78.1093	225.012	77.6927	203.366	144.654	288.408	79.225	199.6	114.488	271.498	85.2811	261.374	84.8844	234.443	76.6504	245.776	166.985	238.655	157.014	268.726	155.845	171.655	226.542	222.286	213.304	47.3634	38.2686	46.7188	27.4933	22.6684	24.1754	36.535	30.4219	31.4415	80.7572	41.0044	48.7161	30.3116	71.965	53.5772	55.461	39.6026
YNL134C	YNL134C	1130	418.435	370.296	16	381.493	787.64	339.17	620.125	366.564	621.947	501.617	610.057	364.106	513.208	350.557	498.91	325.306	500.37	290.253	488.949	318.339	516.886	445.909	522.858	371.209	555.054	532.317	432.954	392.633	347.526	286.674	164.751	165.272	145.918	174.695	154.644	166.655	140.262	113.269	99.5521	185.821	122.113	128.26	80.0774	211.512	167.599	151.569	139.078
YHR174W	ENO2	1313	469.067	357.248	17	420.733	913.945	316.447	620.316	273.06	672.62	357.955	462.849	209.471	429.335	308.481	398.624	334.64	584.31	252.571	534.151	325.525	526.911	385.721	630.325	341.026	616.426	735.668	578.996	423.416	331.511	318.767	81.3544	67.1723	54.9975	76.4048	57.4691	71.8665	54.7202	51.5733	35.2024	309.983	233.307	172.358	111.502	336.717	304.047	234.005	254.534
YCR012W	PGK1	1250	433.552	346.842	18	301.429	769.627	239.006	550.264	213.541	564.724	255.481	427.573	165.781	420.455	246.65	366.737	299.368	635.915	236.705	532.841	316.662	514.517	529.765	628.431	412.649	548.247	557.735	505.127	353.361	262.179	301.262	69.1018	62.7789	50.8339	60.5164	43.6533	50.7914	54.9399	39.9054	28.7712	323.822	239.754	180.495	118.267	349.068	346.891	229.251	283.1
YGR142W	BTN2	1232	422.188	342.685	19	710.977	897.755	488.705	673.407	388.918	342.861	695.73	640.778	107.279	175.481	401.502	529.703	1042.73	895.14	972.998	945.963	1058.33	1085.81	84.7122	510.719	172.89	643.651	285.901	205.324	198.417	182.489	214.493	42.0276	25.7243	23.5773	34.6197	14.3963	16.5897	20.3827	26.6924	27.3796	190.533	34.906	121.075	26.1673	153.193	40.616	141.84	38.8058
YML028W	TSA1	590	197.696	335.079	20	164.043	327.879	145.526	269.765	169.106	270.898	263.504	296.937	171.467	230.823	176.013	263.926	147.179	250.623	118.204	253.196	155.297	262.088	197.113	252.13	179.348	265.323	218.158	187.684	195.759	175.489	139.393	54.2802	53.2407	46.622	51.988	47.978	55.3098	41.5895	36.8152	30.1627	94.7458	66.9952	68.7671	46.5977	100.402	82.3455	74.8078	81.2438
YOR298C-A	MBF1	455	147.646	324.496	21	166.187	274.269	115.117	196.358	121.4	172.057	199.158	215.919	81.9182	131.081	143.171	180.466	203.967	259.304	189.602	239.111	205.519	270.837	87.2833	207.473	98.0383	223.43	148.071	123.653	126.733	103.184	103.518	33.3322	24.5104	25.8527	26.0914	22.6103	25.4617	28.349	21.3646	14.8557	62.9489	23.4062	33.1372	13.82	62.1539	22.7363	39.0622	18.7468
YLR075W	RPL10	665	211.908	318.658	22	274.585	363.798	237.753	256.061	236.44	315.02	328.76	283.854	222.039	232.943	272.826	258.289	238.846	262.649	210.228	230.185	231.308	237.939	167.051	276.296	146.026	297.476	214.087	193.705	258.525	189.969	195.907	157.439	131.107	127.085	126.095	127.448	136.444	142.185	113.483	84.057	140.135	93.4506	71.6263	42.1622	137.406	84.3253	81.3673	53.1471
YLL024C	SSA2	1919	609.05	317.379	23	519.718	1168.06	430.813	906.277	351.571	682.543	516.67	699.41	171.392	399.2	369.639	577.407	584.785	994.051	465.476	928.848	575.916	909.837	266.267	701.932	331.339	774.611	655.339	526.414	463.545	405.639	377.01	112.183	94.1106	77.0739	101.25	67.5117	76.385	74.9381	71.6059	55.173	428.241	212.921	295.193	118.746	430.047	199.553	359.925	193.186
YKL152C	GPM1	743	231.272	311.268	24	130.582	368.409	108.267	279.444	121.491	259.048	168.97	255.943	122.017	214.553	123.233	236.162	168.106	318.077	139.226	282.266	185.638	309.476	292.109	339.885	228.906	350.869	323.906	262.401	202.533	171.078	153.332	49.2737	45.2054	38.2465	48.7947	42.9857	44.9537	41.5346	32.2333	23.9572	165.483	138.317	81.8533	57.0098	175.505	182.323	100.567	137.836
YML131W	YML131W	1097	336.867	307.081	25	221.272	565.587	205.006	518.16	221.81	451.432	375.158	613.449	188.823	572.389	296.861	538.369	149.733	366.577	125.145	290.618	152.582	315.126	427.978	481.987	346.587	474.436	366.23	296.24	301.999	252.301	239.129	93.2776	78.2135	78.5747	72.7443	55.8437	58.9378	78.2894	68.5158	64.0112	161.018	110.207	92.3737	64.3907	151.45	124.168	115.344	101.654
YCR024C-A	PMP1	122	36.0336	295.357	26	19.1073	42.2448	14.7865	29.7077	18.9915	35.5481	16.376	25.9723	16.3088	30.2494	13.4548	23.1367	20.6325	39.899	17.4529	34.8021	17.4859	31.8953	18.7224	56.0165	13.589	49.7553	52.9355	42.4049	40.3008	35.6732	34.5781	9.55173	8.32428	7.06834	10.3976	5.28251	8.54219	5.82363	5.43438	2.48222	39.9321	20.1828	25.806	11.8678	41.4857	27.2526	27.4541	15.7473
YOR153W	PDR5	4535	1335.39	294.463	27	504.525	1756.37	538.578	1765.6	463.793	1573.56	533.79	1276.71	246.802	1256.27	441.744	1306.76	463.643	1243.72	392.59	1154.78	498.227	1268.34	684.093	1472.02	673.711	1609.19	2053.13	1814	1581.85	1387.8	1316.89	134.646	107.233	87.0954	173.099	116.447	173.515	91.2003	91.4787	94.9261	1051.83	635.075	695.442	366.599	1034.3	609.085	822.518	541.266
YPL187W	MF(ALPHA)1	497	143.481	288.694	28	62.7278	162.439	39.5977	96.2147	55.6116	114.64	61.0376	125.694	53.0411	109.31	52.1677	102.811	121.241	238.837	115.229	212.58	110.424	207.502	46.7401	268.166	35.6992	214.511	232.842	163.344	145.683	143.364	116.053	9.41998	7.80401	8.7628	32.1664	28.067	34.4656	5.60387	4.10242	2.21895	106.254	65.7174	66.2744	33.1201	109.716	83.6138	70.3857	48.6245
YLR460C	YLR460C	1130	323.884	286.623	29	203.376	558.081	144.857	425.204	163.018	410.393	412.707	692.626	220.693	487.943	244.448	551.746	117.998	235.492	102.734	228.875	93.8967	263	357.44	477.866	295.102	582.63	489.376	417.858	292.481	275.412	249.287	94.2657	87.4627	75.9604	93.5784	73.5779	85.5868	88.5082	61.4831	58.0689	95.7379	54.1015	66.7143	35.5348	109.566	89.0891	74.2551	51.3896
YDR353W	TRR1	959	268.704	280.192	30	188.277	318.23	153.796	259.511	162.019	232.267	324.045	393.364	170.495	252.307	245.549	379.273	164.864	255.879	147.259	269.655	174.459	294.166	357.308	375.633	341.878	478.895	325.263	319.054	356.705	346.471	297.804	79.6416	75.2075	66.7619	77.1837	71.9234	77.4734	63.6204	63.9871	64.989	143.508	98.1261	105.79	80.026	137.456	137.377	127.247	142.733
YGR055W	MUP1	1724	471.878	273.711	31	361.36	725.452	297.651	722.281	223.991	589.386	417.008	566.447	109	368.091	405.783	649.677	461.186	595.14	410.44	581.728	509.406	619.589	401.147	355.476	402.827	403.089	534.784	488.758	418.871	353.855	423.042	229.637	209.726	199.656	230.811	135.952	179.98	162.842	164.63	157.471	413.012	219.862	277.268	179.815	334.824	216.288	329.044	290.95
YJR104C	SOD1	464	123.185	265.484	32	70.7435	213.261	61.1508	147.389	73.2401	201.825	94.3685	167.463	77.0554	168.892	79.3219	133.267	49.0268	141.12	43.9297	117.59	53.9746	121.293	183.4	237.318	159.48	203.481	156.339	152.742	142.253	112.677	95.5221	23.3853	23.9323	23.4804	15.0317	14.019	16.2269	16.8116	12.3605	10.6058	35.9637	24.5969	28.1153	19.5398	37.9497	31.0265	35.4877	35.6423
YDR011W	SNQ2	4505	1185.88	263.237	33	629.701	1821.35	638.993	1651.27	559.478	1342.54	666.452	1265.66	313.608	1058.61	524.124	1291.03	533.498	1126.81	471.128	1120.22	580.786	1223.32	751.533	1265.99	741.835	1530.92	1682.09	1591.71	1114.1	1069.24	1005.14	196.304	160.069	137.252	189.571	124.836	163.324	131.142	127.974	127.458	844.131	506.254	741.995	389.393	829.714	514.118	841.348	590.805
YNL031C	HHT2	410	103.583	252.641	34	107.28	208.222	87.7164	146.43	101.864	153.078	104.459	131.8	83.7136	95.1022	65.6837	94.2293	84.5934	124.077	75.0672	118.491	72.9775	123.663	126.706	182.75	89.9208	155.603	131.29	99.397	121.245	95.608	88.4984	47.3634	56.9404	44.2497	36.9952	35.7295	36.8073	53.6214	39.266	24.2581	39.9817	23.8128	29.8015	14.642	43.9759	29.5417	34.9717	22.7539
YGR155W	CYS4	1523	383.972	252.116	35	140.275	456.436	123.471	402.108	110.405	309.047	205.775	406.834	95.459	253.797	157.298	433.202	191.883	519.245	167.191	518.429	185.478	505.768	257.697	413.832	252.092	503.538	467.535	415.992	462.773	418.968	422.934	87.1513	71.9125	61.6785	84.6606	70.0659	77.6712	62.2469	61.3765	56.5645	309.338	158.5	204.065	109.464	295.779	182.725	241.522	176.477
YKL060C	FBA1	1079	271.778	251.879	36	115.482	389.745	96.4045	252.036	114.585	297.294	92.5489	206.712	112.666	245.719	92.8989	182.233	110.138	271.489	89.0493	245.826	109.307	239.306	354.473	423.409	276.445	398.981	525.653	436.092	325.922	241.369	229.404	44.4649	40.0028	34.3734	52.7669	47.6587	53.7267	36.1505	22.59	20.986	209.234	197.414	115.98	97.0142	252.201	261.019	144.641	219.009
YEL017C-A	PMP2	131	32.9475	251.507	37	16.7771	38.8137	14.6194	30.5702	16.9016	30.924	20.2632	32.7561	16.5333	30.7077	17.4912	29.3625	17.0955	36.6338	14.7754	35.8667	15.889	31.1663	21.7549	56.0165	15.7866	45.5308	50.0975	37.4859	30.6115	41.331	29.2834	10.5398	8.90235	8.23025	11.0986	8.73646	11.5765	5.76869	6.02044	5.90468	32.3922	18.2371	16.2754	9.02498	29.4334	13.2706	19.052	8.76412
YAL005C	SSA1	1928	483.7	250.882	38	424.275	880.171	330.064	736.655	275.877	409.622	485.489	599.3	87.6786	256.604	261.573	491.338	676.452	1049.16	577.73	984.04	744.068	1020.74	228.163	604.154	282.589	715.116	497.396	338.56	221.311	196.298	203.363	28.1282	17.4579	13.12	32.3221	15.9927	16.2928	13.6251	13.3196	12.9376	249.018	78.1466	199.886	59.9724	251.155	93.5435	279.258	124.057
YPL061W	ALD6	1502	374.682	249.455	39	367.885	787.747	303.749	582.655	411.453	605.763	274.917	388.13	350.116	503.068	161.151	352.939	323.145	526.173	295.013	462.09	409.361	500.21	294.416	578.985	269.448	571.952	366.477	228.647	203.476	182.106	143.499	50.196	45.7257	38.779	69.2395	42.8406	74.472	27.9644	21.8973	17.8269	198.222	129.344	163.67	97.6821	264.552	234.168	231.02	216.174
YJR045C	SSC1	1964	472.704	240.684	40	642.75	972.809	538.411	843.699	505.775	577.922	633.038	661.033	288.098	366.43	407.985	548.802	650.22	741.118	552.046	744.683	648.654	782.984	252.884	491.453	275.682	589.319	561.684	419.214	309.887	283.563	249.287	146.372	127.061	99.4892	119.436	91.4281	101.253	99.4413	84.3927	82.6655	234.98	105.647	182.145	76.1729	233.426	111.485	209.425	109.505
YAL038W	CDC19	1502	355.997	237.015	41	179.515	511.655	146.11	374.317	158.202	404.035	184.354	314.284	187.252	330.165	154.057	289.25	169.187	340.376	130.897	315.839	163.84	333.078	377.019	489.225	277.387	467.63	693.097	525.227	386.116	330.456	267.44	115.872	107.638	89.3709	99.1861	84.8975	102.143	87.6841	76.6673	63.0333	277.094	235.398	168.362	119.688	320.381	302.284	216.058	255.261
YLL026W	HSP104	2726	622.444	228.336	42	508.067	1270.67	403.078	1034.21	346.119	616.36	533.542	747.284	132.865	339.102	325.299	586.998	770.183	1385	669.754	1233.47	870.86	1317.09	210.561	836.684	280.391	911.203	680.265	486.808	264.099	191.695	251.664	41.6324	32.0832	28.7091	42.1356	19.7369	24.3733	27.0304	23.1227	22.0767	237.41	63.0748	232.071	64.8531	266.246	82.9642	298.494	127.291
YNL030W	HHF2	311	69.8318	224.54	43	63.6598	130.594	43.9417	80.69	56.5203	97.0107	69.6392	94.3917	52.8166	68.4622	40.8535	64.8668	61.2099	95.3276	54.7386	84.1802	53.0964	103.25	94.0734	118.826	64.2227	113.123	80.9457	68.187	63.7096	71.1546	55.1089	32.1465	35.0891	33.0178	20.2111	23.1618	21.9656	31.8652	16.8359	13.2385	31.8961	16.8432	20.4908	11.5424	32.82	23.8808	22.7003	18.489
YBR008C	FLR1	1646	361.377	219.549	44	170.381	558.725	131.658	489.986	130.306	444.496	241.752	447.828	117.005	409.627	160.173	356.305	126.153	339.659	106.701	333.527	108.748	356.498	621.926	518.848	524.052	482.885	507.021	368.583	391.432	343.498	297.048	102.039	96.3651	87.8216	158.262	93.2857	125.659	72.1361	69.3682	74.3538	254.326	173.281	157.109	116.691	267.491	238.19	190.778	185.71
YLR249W	YEF3	3134	680.282	217.065	45	532.301	874.81	485.949	709.823	470.609	712.696	538.752	622.171	416.773	492.183	441.744	590.195	445.761	588.053	390.806	634.381	398.582	597.262	281.693	660.839	236.889	770.269	1072.04	819.262	833.369	814.346	699.991	359.408	323.259	256.784	461.194	333.872	434.003	251.405	219.879	222.121	716.546	469.605	426.385	200.108	737.928	370.895	467.604	232.015
YDR050C	TPI1	746	156.659	209.999	46	81.0894	234.276	66.748	164.447	74.3305	219.358	81.7143	143.429	89.3245	180.637	72.2887	121.657	73.5894	166.923	56.821	140.273	71.7	123.754	236.535	295.562	170.693	240.445	247.403	224.407	192.501	134.062	147.281	34.518	35.8406	30.7908	29.5962	26.2965	29.9801	36.8097	24.7211	15.3822	103.228	89.6173	48.1663	39.0454	111.658	127.138	68.0641	85.7196
YOR369C	RPS12	431	90.0784	208.999	47	144.936	163.082	111.525	108.96	124.672	129.283	131.173	115.325	91.6436	83.2431	106.843	99.8662	119.079	124.077	110.667	105.225	106.113	114.55	22.8097	94.1032	19.3745	106.552	77.7375	70.3921	94.321	89.9501	85.689	76.6773	64.8022	71.8453	62.5803	52.4768	59.8943	71.6966	47.1512	36.3683	83.9815	52.301	29.8748	12.3644	74.9034	21.3443	36.2615	11.4824
YGR234W	YHB1	1199	250.045	208.545	48	58.6267	327.879	48.787	282.032	60.6094	228.51	182.369	496.768	187.028	371.643	114.06	431.436	48.6338	204.592	49.1854	184.574	41.3593	199.482	304.041	285.539	203.387	330.803	329.459	254.429	200.818	242.904	180.347	19.2352	19.4233	14.766	34.7366	19.6498	24.4063	13.4603	10.1761	8.34929	198.222	137.301	87.5351	59.2189	221.324	203.698	113.17	120.331
YER091C	MET6	2303	477.88	207.503	49	160.128	539.854	138.091	498.994	93.6855	352.976	191.632	402.182	49.6746	149.757	169.958	439.512	454.407	856.037	412.522	866.368	489.924	865.912	416.837	465.727	561.859	586.62	738.259	615.04	561.639	446.586	519.429	286.684	263.082	219.99	444.566	314.106	350.329	232.121	259.571	223.287	353.734	166.747	214.292	118.866	303.349	149.286	250.956	199.372
YJL034W	KAR2	2048	404.335	197.429	50	414.674	697.896	339.755	680.211	283.51	433.032	437.767	508.979	162.714	361.675	296.249	427.986	431.122	631.217	358.974	613.172	442.816	625.239	191.905	475.75	213.523	559.513	472.471	352.045	269.758	209.053	233.511	95.4514	80.8727	65.1642	84.9332	42.4633	58.4101	56.0387	57.3274	48.1776	274.118	138.085	185.774	89.5819	246.076	130.045	217.422	127.431
YLR355C	ILV5	1187	228.15	192.207	51	211.112	360.153	186.376	269.861	212.996	348.545	192.79	230.358	192.115	230.48	167.879	207.725	155.628	254.446	141.904	208.158	119.207	231.013	183.203	257.253	156.924	282.455	307.371	271.222	264.356	246.164	199.581	127.334	121.569	116.289	121.072	98.6843	119.591	117.956	96.6999	85.5614	175.106	103.702	110.958	62.8666	210.267	161.381	119.471	99.6626
YCL026C-A	FRM2	581	107.971	185.836	52	60.6772	131.13	43.1063	139.818	41.6178	84.198	186.256	313.218	49.4501	172.845	116.139	260.813	20.6325	39.5805	16.1637	42.4995	14.6913	45.9292	107.588	181.413	113.466	230.705	78.4778	74.4629	185.984	142.501	135.287	56.5858	49.83	48.2196	36.6058	33.2624	31.2994	55.3245	50.1881	50.1333	27.6301	12.2258	11.62	6.50757	22.5607	15.0338	15.8828	10.3342
YIL053W	GPP1	752	139.484	185.484	53	47.6284	130.701	33.0816	98.9938	45.5252	103.754	50.6166	112.03	49.0013	115.097	37.0617	112.15	51.5813	117.228	45.7146	120.293	45.9902	126.67	135.078	194.22	102.164	223.43	207.547	204.646	228.428	215.573	211.359	56.5199	51.044	47.8807	74.0294	61.9679	73.4166	48.4021	42.5693	49.5316	125.303	57.9928	52.4551	24.9685	128.69	114.64	77.3874	74.0263
YDR224C	HTB1	395	72.8394	184.403	54	56.5762	118.371	44.5265	91.2314	66.5158	79.0921	89.8196	117.263	67.33	66.2278	42.9329	89.1813	65.8276	89.4343	63.465	95.0712	57.8072	110.084	53.728	108.024	38.2556	110.072	101.305	65.3035	55.5637	80.5524	49.49	28.8528	32.0832	24.7876	20.7563	17.3568	21.6358	23.6791	14.172	12.9	33.6819	16.4657	27.0889	11.2341	36.4556	19.4882	29.2967	16.4034
YDR225W	HTA1	398	72.7279	182.733	55	67.6677	120.301	47.9516	80.0192	62.3359	101.731	77.6617	102.726	57.6045	85.993	55.4703	75.4676	44.9003	82.0279	41.7481	72.8797	35.1314	70.7165	68.3631	130.185	41.0362	103.97	91.6809	77.1769	84.4602	81.799	65.8065	31.1584	29.8865	26.7725	21.0289	18.4888	23.9115	28.8984	18.2211	12.5615	37.1543	19.5149	21.6638	10.5149	38.2485	21.1587	30.2179	13.7554
YLR044C	PDC1	1691	307.533	181.864	56	164.975	389.424	139.01	288.356	136.939	355.674	133.158	215.531	150.67	277.974	129.227	212.521	136.175	347.384	119.294	310.107	154.818	305.466	317.16	402.918	232.538	350.986	553.293	424.558	286.736	242.712	221.624	94.2657	90.4109	71.9905	100.939	86.581	104.188	77.6851	67.8232	50.4342	289.545	305.036	214.989	163.049	329.894	384.073	252.983	373.881
YLR325C	RPL38	236	42.639	180.674	57	54.1528	62.831	38.3446	55.2947	49.0691	45.9524	62.9399	52.9136	45.0363	38.7284	42.6271	55.0232	49.9111	55.11	50.9703	54.7826	46.9484	55.0422	9.75674	53.6778	9.59753	62.6636	39.3623	37.1467	40.2151	64.8255	35.1184	29.1163	28.3257	23.8677	20.4058	18.4307	19.6239	19.4487	14.172	16.7362	32.3922	13.0099	14.2959	4.88068	28.8856	9.52758	17.0621	4.35863
YLR108C	YLR108C	1457	262.953	180.476	58	230.313	377.415	217.119	321.993	220.992	293.537	214.293	271.449	174.459	240.677	172.343	250.465	162.801	206.105	164.116	197.348	205.04	209.507	271.145	296.453	240.835	347.114	488.389	397.503	300.37	292.674	265.711	78.0607	69.1377	63.0825	80.2601	71.8073	77.7042	72.8503	62.0158	50.1709	202.786	120.487	138.341	81.1734	204.938	164.351	150.242	122.252
YJR123W	RPS5	677	122.015	180.228	59	145.774	182.703	111.692	132.631	134.395	150.285	159.211	158.256	107.204	106.732	119.319	138.483	138.631	157.048	116.518	148.462	125.515	151.639	26.7651	121.276	25.6981	151.261	147.084	108.896	125.533	126.39	106.544	61.5263	62.6633	56.8372	57.7125	53.7249	61.7082	49.0614	45.0734	41.0319	97.3253	59.2125	60.0062	18.6322	107.972	30.5006	63.8999	25.5425
YNL178W	RPS3	722	129.998	180.052	60	151.646	214.548	117.54	147.389	155.658	184.099	198.91	171.339	137.054	139.56	162.619	157.329	161.622	163.976	137.541	162.546	133.02	149.817	23.3371	132.413	19.5538	148.679	142.395	108.641	128.534	134.829	111.082	87.6783	81.4507	75.8636	74.2241	64.6672	78.8256	65.4884	51.6799	45.2065	114.191	49.8616	52.3451	16.5943	105.98	27.6857	59.5883	15.6067
YLR167W	RPS31	458	82.0717	179.196	61	121.634	139.708	83.0382	95.3522	103.681	113.195	137.872	117.844	90.8207	85.592	106.17	108.868	104.44	123.042	96.9824	107.354	100.284	113.638	17.6676	83.8577	15.2933	100.097	79.465	61.063	64.0525	77.8673	59.9715	61.9215	55.4374	54.2713	46.8087	48.3263	51.5829	47.1934	33.5653	33.1339	67.6118	41.0625	32.5874	11.7821	66.8851	19.9832	35.3402	12.3963
YNL007C	SIS1	1058	188.165	177.849	62	260.325	345.785	206.426	267.274	179.011	230.244	248.369	252.745	101.668	162.877	188.672	201.92	283.059	334.722	248.208	299.871	283.766	309.293	90.7113	279.526	110.865	286.915	198.416	163.683	142.682	109.033	106.004	50.723	42.0838	45.2664	37.7351	29.1119	28.43	43.0729	30.7948	28.696	95.2915	29.3594	63.7452	23.1019	83.7683	31.6142	72.4125	29.5262
YBR009C	HHF1	311	55.0269	176.935	63	32.529	87.17	24.8947	53.7614	28.5327	65.027	44.4963	66.4812	32.1688	50.0719	23.3623	48.1242	47.8478	90.8678	46.0121	79.0213	41.3593	86.2996	55.6398	94.6601	39.1974	89.8882	69.1	50.5466	48.1895	51.7837	30.1478	9.41998	11.0412	9.77948	11.7216	13.0321	11.9393	6.92243	4.52865	3.1968	31.9953	17.3949	19.6477	10.532	31.5252	21.5608	24.8008	16.0988
YHL015W	RPS20	365	64.1393	175.724	64	60.8636	85.5617	48.4529	68.0402	58.7011	57.7055	92.3835	97.7836	62.8413	46.5199	54.9199	84.554	80.8599	82.2668	74.373	81.2322	69.0652	91.7674	13.4485	59.5802	11.0327	87.4239	73.0485	53.939	67.7396	82.4703	58.4587	35.9013	28.4991	26.3368	25.9356	22.6974	25.5936	18.9543	17.8482	16.7362	52.5815	23.5514	25.7327	7.89471	55.6297	14.446	28.6702	8.71725
YBR101C	FES1	872	150.587	172.692	65	251.657	267.943	196.067	248.682	183.918	174.754	262.511	209.619	95.6086	106.217	193.137	182.401	276.771	224.103	251.579	234.689	272.827	249.877	56.1672	198.341	76.8251	233.521	153.747	132.473	129.134	107.595	118.538	52.8968	49.0207	46.9609	35.8659	30.8824	32.7176	44.831	41.2373	37.1205	73.9117	23.0868	46.5534	13.82	64.9428	20.1069	53.7658	16.6378
YNL064C	YDJ1	1229	211.716	172.267	66	291.642	379.023	238.004	313.752	220.811	234.579	300.308	262.436	139.897	153.309	215.949	225.393	302.807	329.306	275.577	322.554	298.138	342.647	75.9444	241.439	96.4238	290.904	199.896	167.499	161.632	166.091	138.961	82.2766	71.2188	60.9039	65.6568	50.0387	55.9695	63.3457	47.2578	47.6511	159.481	56.2795	96.8457	30.9795	140.045	48.9681	108.269	38.8527
YOR020C	HSP10	320	52.9194	165.373	67	86.6818	102.717	62.0698	69.1902	70.3323	73.1193	119.346	86.0574	49.5998	54.4833	82.3186	69.5782	93.5342	86.0895	86.7685	78.6118	94.775	84.477	15.624	88.2009	18.612	83.082	47.8764	45.3732	49.3042	38.646	40.089	22.7265	20.406	21.9796	21.574	15.6153	17.0184	20.6574	15.7703	14.6301	16.8657	4.55927	7.88109	1.88377	16.1859	4.08325	9.28649	2.31991
YDL081C	RPP1A	320	52.8182	165.057	68	70.6503	90.6011	41.4355	60.2779	63.4263	71.0962	72.2031	67.2565	48.2532	46.1761	56.3265	60.576	58.6553	60.3662	55.4327	59.614	50.9406	60.7833	14.9647	66.4848	13.4096	78.7402	60.956	45.3732	50.6761	68.1818	50.3544	33.7275	34.0486	29.5321	29.9077	19.9981	29.7822	20.6574	19.7129	21.2117	38.1464	23.4643	20.5275	7.41521	36.0074	10.6721	20.9314	8.31888
YBL002W	HTB2	395	64.1587	162.427	69	41.7564	106.791	30.826	80.2108	43.5261	79.9592	58.5564	86.1543	45.7844	60.0404	31.1906	64.2778	62.1924	82.4261	55.1352	88.0289	50.5413	96.7795	80.0976	95.8851	58.7512	98.4545	82.92	52.4124	50.5904	56.962	34.4701	20.1574	23.7011	16.8478	19.4712	16.9215	17.8759	14.3393	8.95074	6.92013	38.444	30.0273	25.2195	16.0634	39.6928	33.2537	27.8963	25.2847
YEL009C	GCN4	845	133.328	157.785	70	168.983	205.005	136.921	180.93	167.925	146.817	144.323	138.002	133.014	110.284	92.532	129.986	153.762	162.782	135.756	159.025	138.53	155.649	105.742	139.763	65.1645	153.843	171.639	123.483	115.672	123.801	115.729	107.045	101.741	81.9636	87.8928	77.8735	78.2319	87.4094	75.0157	55.361	128.378	83.6932	83.7228	45.1249	125.304	82.3455	86.2685	56.0529
YOR027W	STI1	1769	278.792	157.598	71	190.793	439.067	167.162	352.755	158.838	252.401	293.03	348.203	130.62	174.22	177.847	284.791	284.729	414.679	261.595	427.042	291.751	478.885	90.3817	392.895	126.293	484.176	384.739	315.407	201.675	199.655	190.504	38.2728	33.933	28.9511	49.4568	32.769	35.587	28.1292	22.2703	24.935	148.022	34.3543	119.096	25.7049	139.896	37.0276	135.244	39.7666
YHR055C	CUP1-2	185	29.0641	157.103	72	52.7547	44.2819	61.9027	47.9157	40.7091	20.038	46.1504	45.4515	37.1811	16.4997	15.106	39.122	35.8613	48.8186	41.9464	38.6508	47.7468	46.6583	77.3288	63.1438	51.3064	68.2962	21.1002	21.2024	32.4121	29.7277	33.9298	19.8939	26.3602	14.6692	6.15289	8.67841	5.5079	35.6011	23.3891	9.89127	5.35736	2.00376	3.519	1.98652	1.7431	1.20641	3.1692	1.82781
YDL124W	YDL124W	938	146.725	156.423	73	31.3173	155.898	23.3075	137.039	29.2597	116.278	63.1053	261.564	35.0864	183.559	44.7065	211.848	39.8896	190.018	34.4099	166.313	37.3671	185.995	170.479	256.807	146.788	243.496	220.503	183.698	153.315	107.595	112.163	13.1748	11.8505	11.8128	17.9135	15.1509	17.5131	11.0979	9.59008	9.47757	63.197	35.0512	51.392	32.0241	65.1918	48.504	59.2935	58.4665
YDL055C	PSA1	1085	167.083	153.993	74	71.1163	202.968	67.4163	179.109	63.7898	164.639	96.0226	183.55	79.1501	139.789	72.2887	159.853	84.2004	183.567	79.3312	181.708	83.8364	187.271	177.335	244.668	125.665	243.848	230.991	175.302	210.936	184.12	167.704	44.0038	40.3496	36.9877	48.2106	39.8801	45.5144	43.1278	27.7047	18.1653	128.973	101.727	71.9195	54.2355	143.532	127.88	91.3908	94.5306
YEL034W	HYP2	473	72.4936	153.263	75	42.7816	110.866	31.8285	67.3694	38.8918	82.0786	54.5038	74.3311	36.2834	52.0771	36.8783	62.0062	53.0551	91.3457	38.079	85.8179	50.0623	88.3956	53.2665	95.6623	44.6689	91.179	109.696	77.2617	57.7931	67.2229	47.653	16.7979	14.3363	12.9748	22.6255	20.0852	23.8456	11.2627	10.7089	8.83821	71.481	42.3403	41.9714	20.4646	81.1287	51.3499	49.1226	33.9551
YBR010W	HHT1	410	62.8235	153.228	76	51.6362	87.4917	40.6837	69.0944	49.2508	74.468	62.0301	80.4365	48.4028	57.6915	37.4898	52.9198	61.6029	92.5402	51.8628	84.4258	47.667	92.3141	65.9898	118.047	51.6204	104.557	84.6475	62.5048	64.3955	65.6885	47.8691	27.206	27.2273	22.7542	21.1846	18.8661	23.8456	29.0632	21.1514	15.0438	30.8544	17.9757	17.9249	8.15159	33.2683	20.7256	21.9633	12.9587
YPL106C	SSE1	2081	317.5	152.571	77	507.228	615.551	405.834	503.785	339.394	363.67	535.444	414.975	187.028	224.063	375.388	353.696	573.093	485.319	481.541	490.014	594.36	516.977	68.0335	311.042	86.9608	401.798	350.559	257.822	231.258	234.657	201.526	123.975	101.163	85.7399	140.309	96.1591	108.806	71.312	73.3641	82.6278	209.83	70.1315	145.489	39.3194	191.84	44.6064	156.728	40.4227
YEL071W	DLD3	1490	226.282	151.867	78	128.252	406.901	100.749	290.848	88.1426	245.85	149.038	334.054	132.79	267.26	122.377	280.753	108.959	218.688	100.552	210.778	100.683	196.566	278.529	347.013	287.522	422.099	327.731	285.978	288.279	231.78	244.965	55.7294	49.3098	51.7538	74.7693	61.3874	69.3269	47.523	34.5243	30.8773	86.561	55.9019	46.5167	41.2546	86.7564	70.467	55.7189	62.0753
YAL003W	EFB1	986	148.752	150.864	79	117.813	249.073	99.1613	187.446	99.3194	146.239	172.857	171.339	86.7061	107.763	123.478	149.505	208.782	220.201	183.652	208.895	189.55	211.511	56.0353	191.325	54.401	217.093	172.503	134.678	133.25	143.172	127.939	31.4878	31.6207	25.1265	52.9226	49.4292	51.7149	27.47	22.8031	19.8578	117.217	59.7062	65.8712	24.8658	106.329	43.6165	66.9954	26.6673
YMR058W	FET3	1910	288.093	150.834	80	111.568	332.061	128.484	486.152	168.561	367.138	343.068	629.73	361.936	534.062	207.081	437.409	97.0712	146.376	82.802	141.583	77.4488	142.891	490.54	606.158	302.188	535.339	410.528	266.896	232.887	225.067	174.836	60.2088	75.4388	39.4084	84.1933	59.704	84.6963	59.1154	34.2046	36.2931	123.12	75.591	85.5923	45.4674	129.935	95.9563	109.706	95.9366
YDR382W	RPP2B	332	50.0385	150.718	81	63.5666	82.9884	47.5339	56.9238	55.9751	58.2835	64.9249	59.5036	44.5126	48.2959	54.0025	58.4726	59.8344	61.0829	45.2188	58.877	51.4196	59.3253	13.6463	60.3597	12.9163	67.8268	58.2414	51.9884	46.1316	56.962	42.6824	28.5234	25.5509	27.2082	23.8716	25.1645	27.2756	20.8222	14.3318	19.9706	41.5691	19.1373	16.6053	6.98708	41.7347	10.6103	20.1207	6.67854
YCR005C	CIT2	1382	207.766	150.337	82	184.362	457.723	144.774	313.848	128.306	298.354	163.015	284.726	220.319	336.811	138.339	246.679	63.9609	113.167	55.631	100.967	65.1528	106.166	315.248	276.073	282.41	319.655	407.196	346.363	255.438	236.958	224.65	157.044	123.65	116.918	150.123	125.91	157.025	113.616	94.6754	107.6	53.0279	43.618	26.5391	35.9458	67.4828	77.5508	33.3503	70.277
YEL046C	GLY1	1163	174.783	150.286	83	142.512	322.09	119.963	265.069	106.498	262.998	137.376	182.484	107.578	196.277	137.422	196.535	96.6782	157.924	89.0493	165.658	104.516	178.887	90.5135	151.122	95.4371	160.179	195.331	178.524	192.672	155.735	135.935	50.4595	47.3443	36.552	39.3317	30.8534	39.7426	36.0955	35.4833	28.9968	137.902	79.192	101.904	62.7981	144.528	107.959	123.488	110.606
YLR441C	RPS1A	767	114.882	149.781	84	126.481	158.043	112.026	136.272	107.134	123.311	142.917	143.623	103.015	101.461	108.555	131.248	124.581	144.146	108.882	133.886	109.307	142.8	29.7976	117.824	25.115	153.021	115.989	97.0223	124.504	128.596	100.601	63.8978	50.9284	45.0727	54.9476	48.6165	52.5064	45.6001	42.889	32.4193	108.04	47.3932	57.477	17.3307	104.486	29.882	66.9585	18.8171
YOL086C	ADH1	1046	156.215	149.345	85	46.5099	239.101	36.089	161.476	43.7987	177.452	50.4512	123.368	40.6972	91.2638	49.3545	124.77	57.4763	187.629	43.2355	165.494	53.0964	172.417	166.788	250.459	180.873	275.649	159.67	156.304	208.621	158.899	160.248	11.1327	9.53823	8.85963	18.3808	14.2512	19.9538	9.33979	4.58193	4.17464	126.344	100.769	68.2905	51.2215	141.141	156.958	93.5651	123.963
YMR318C	ADH6	1082	158.364	146.363	86	93.9518	254.326	74.2665	196.263	73.331	195.466	144.241	206.906	81.6937	183.96	122.866	190.814	118.588	197.424	98.0732	177.614	100.683	182.623	87.8107	208.475	83.956	206.766	180.03	167.414	191.815	162.927	145.768	59.9453	58.7324	56.9824	94.4351	84.9266	87.4997	54.9949	49.7086	49.4564	88.1483	39.5234	49.7791	25.3795	92.8822	51.6902	70.1277	42.813
YPR149W	NCE102	521	76.0947	146.055	87	40.8243	92.7455	41.8532	87.0149	55.4299	84.9686	33.2481	58.9222	34.0391	56.603	17.8581	48.0401	46.9636	135.545	40.1614	101.786	59.1645	110.631	65.4625	114.594	51.0373	98.5719	222.724	139.088	42.1015	35.0019	31.9848	3.09608	3.1216	1.79129	8.68414	7.1401	7.18995	2.08772	2.18441	1.09067	35.9637	18.2371	36.2897	19.2658	39.892	31.6761	43.2632	36.1578
YKL096W-A	CWP2	278	40.3772	145.242	88	4.84672	16.7264	2.92388	8.24149	5.54299	18.2076	3.72181	7.17145	4.63829	10.3696	1.95705	4.7956	22.401	57.7381	19.5353	68.4578	24.1928	65.431	27.3584	60.3597	21.4823	46.0002	83.9071	45.7124	46.8175	57.3456	29.1753	4.15006	2.94818	2.37225	6.42548	4.26664	5.90367	2.52724	1.11884	0.63936	41.0731	27.9364	37.9758	22.2628	52.0937	35.1098	46.0271	42.438
YKL056C	TMA19	503	71.7251	142.595	89	52.7547	85.1328	38.7623	62.3862	43.1626	60.9809	60.5414	78.9828	42.6423	67.0872	51.7396	70.083	48.8303	84.3374	41.6489	77.056	43.9143	74.0882	38.7633	94.326	36.8653	123.098	94.7657	70.8161	90.8054	84.4841	65.5904	27.1401	22.2559	18.397	36.7226	36.0198	39.8086	20.5475	14.1187	14.3292	78.7234	53.753	31.3777	15.2243	70.0725	34.7695	34.0136	14.9271
YCR024C-B	YCR024C-B	266	37.2158	139.909	90	19.1073	32.1661	16.4573	38.7159	18.0829	35.4518	19.8496	24.7124	19.2265	29.2182	8.99022	20.0237	20.1413	37.9877	19.5353	33.0006	19.0029	31.0751	21.2934	61.0279	11.9296	49.8727	53.7993	36.977	33.6983	33.8512	37.4957	10.1446	10.2319	8.56915	11.0596	4.84714	8.04747	8.46075	5.00815	3.15919	51.887	29.7079	28.2619	14.6592	49.0059	34.2745	36.4089	21.0198
YGL253W	HXK2	1460	199.047	136.334	91	146.054	264.405	124.975	251.174	153.75	202.788	177.241	213.884	113.788	174.163	120.726	195.442	127.922	204.194	107.99	171.226	124.158	174.786	167.117	298.235	136.922	317.777	295.402	209.819	197.903	190.449	170.73	111.722	101.163	82.7383	99.1082	82.8658	98.0538	76.6412	62.2289	53.443	186.367	126.963	100.291	60.8972	193.085	159.216	126.141	103.998
YLR259C	HSP60	1718	233.997	136.203	92	375.901	485.279	312.855	365.022	262.156	337.755	292.038	279.783	148.425	214.839	263.224	229.6	284.336	343.402	237.399	314.447	293.826	313.759	85.5693	335.653	104.541	337.374	258.014	233.99	210.936	151.803	166.623	85.6362	81.682	74.2659	83.1419	55.2632	60.4549	71.9164	61.4298	52.1642	116.374	39.0297	84.236	26.0132	105.183	32.0782	92.9754	35.7829
YPL131W	RPL5	893	118.325	132.503	93	134.776	204.469	118.626	158.122	117.766	164.928	143.744	137.614	101.593	101.805	109.473	132.846	119.963	128.059	108.287	141.174	112.181	142.162	22.4141	107.467	18.2532	131.312	138.57	110.677	133.336	130.322	107.3	62.0533	62.4899	52.7704	64.8779	58.8042	67.9087	46.6989	38.9996	38.0983	87.3547	38.2456	62.4255	21.2695	91.7865	25.1491	63.863	22.9882
YBL003C	HTA2	398	52.0088	130.675	94	32.4358	82.774	26.2314	60.2779	29.6232	65.316	38.7068	65.5121	27.9794	46.4053	24.9524	43.3286	39.1036	74.9401	34.3108	63.217	32.3369	68.5294	73.5052	98.001	52.5173	92.5872	59.1052	48.0871	49.0469	48.4273	39.1165	15.4804	18.6718	13.2652	11.4101	12.5677	14.215	13.4053	8.3114	3.87377	28.0269	18.7598	18.9879	10.9944	30.7283	21.6227	22.1844	16.9424
YOR063W	RPL3	1163	151.376	130.16	95	157.239	248.858	127.899	161.188	128.488	207.123	160.451	168.432	110.87	133.888	141.948	155.899	129.297	155.933	108.089	151.983	112.181	164.398	60.8478	148.449	56.9573	180.363	187.063	157.068	181.611	166.858	138.745	75.5575	73.0687	66.9071	92.9164	90.7605	95.7121	66.3674	52.2659	53.1045	134.033	74.2842	81.0469	34.8326	134.418	64.7752	87.9268	46.9841
YDL020C	RPN4	1595	200.332	125.6	96	472.649	334.527	402.827	303.785	401.821	259.915	452.158	287.924	226.603	232.313	333.556	283.866	396.636	275.232	379.501	254.424	486.251	292.981	214.055	141.433	168.316	159.123	201.871	187.43	126.219	123.322	131.613	102.698	87.7518	80.6081	122.59	97.8426	119.789	87.794	86.8435	83.7561	157.794	112.82	121.662	84.119	136.908	128.282	127.763	119.558
YNL231C	PDR16	1055	130.522	123.717	97	61.0501	185.277	52.7969	164.638	72.604	157.799	95.8572	183.163	74.3622	166.715	72.2276	190.31	59.7361	120.812	53.1519	109.074	55.6514	135.783	171.798	159.363	125.575	179.307	190.148	180.39	120.559	126.774	128.371	23.0559	22.9496	21.6891	31.2707	27.2543	33.641	21.976	15.5572	17.1123	76.6896	55.8439	52.1251	38.2063	73.2101	70.9928	55.8295	55.7248
YHR162W	MPC2	389	47.4656	122.019	98	29.0803	62.9383	30.4083	43.9866	32.8944	46.6268	42.0151	61.5388	31.3459	47.2074	31.0682	55.7804	31.9313	43.4031	28.7576	40.0429	26.5083	42.6486	54.3213	90.4282	47.9428	97.6331	70.4573	61.5719	73.8276	55.8113	60.6198	23.0559	21.0997	19.4137	14.9928	16.4861	15.897	22.855	19.3933	17.8269	20.5365	9.87359	12.0232	6.4562	18.8255	12.0332	14.3719	10.0295
YCL026C-B	HBN1	581	70.338	121.064	99	49.8653	105.719	35.1701	104.935	32.4401	60.1139	125.466	164.362	14.8126	76.4255	90.208	163.471	38.4158	87.4434	33.4183	91.0587	49.184	103.523	95.6556	88.535	120.373	126.618	47.1361	40.8783	72.9702	57.8251	54.1364	28.8528	27.2273	28.1765	27.4543	22.0879	25.6266	22.6902	23.8686	20.798	22.5703	12.8357	13.5628	9.29898	17.1322	11.7239	15.5512	16.5206
YOL039W	RPP2A	320	38.478	120.244	100	35.1387	60.5794	31.2437	39.0034	36.6201	44.7001	45.985	45.5484	31.5703	27.614	32.8418	44.843	38.8088	44.9959	35.3024	45.038	37.8461	52.3083	8.30641	46.9959	5.56119	53.2758	41.0898	32.5669	45.0168	49.7699	41.7099	15.4145	20.117	16.1216	14.9928	13.9029	14.281	16.9764	15.7171	12.9	31.1024	13.9392	15.1757	4.1443	29.6327	7.51689	16.7304	4.8976
YKL081W	TEF4	1564	185.885	118.852	101	246.996	331.632	194.146	249.545	203.091	233.327	231.91	196.343	147.527	145.289	179.254	184.084	189.132	199.495	165.703	188.259	179.729	185.631	70.1431	202.35	57.047	220.965	229.387	189.041	213.594	194.572	176.24	117.849	107.695	96.3424	105.105	81.8789	97.9878	96.7492	74.5895	68.938	166.772	91.4759	94.1698	44.6283	168.184	103.164	104.62	58.8649
YDL061C	RPS29B	170	20.1314	118.42	102	18.2684	29.3783	20.3001	22.0412	22.4445	19.7489	22.6617	24.4217	16.3088	18.4475	16.5738	24.2304	17.9798	25.2455	16.3621	23.5836	16.5277	20.413	4.61467	22.0502	5.2921	24.5256	18.5089	16.8771	17.8352	25.2206	17.6132	9.81522	9.71166	8.90804	8.33366	6.93693	8.80604	7.69159	5.80732	6.58164	23.1656	9.11855	12.0966	3.49354	20.0705	6.46514	14.0034	3.84309
YJL101C	GSH1	2036	239.595	117.679	103	143.072	305.792	123.722	239.099	127.307	242.479	181.211	248.19	112.217	208.423	134.792	214.372	166.829	251.897	145.374	256.799	153.54	255.892	220.252	298.012	198.005	328.104	363.145	334.15	261.012	226.122	216.005	67.3232	56.7091	56.0625	108.26	90.2381	96.6685	59.8845	49.2291	47.2374	196.337	115.695	141.933	73.724	204.142	130.819	151.827	118.105
YJL190C	RPS22A	392	45.907	117.11	104	48.2808	60.9011	37.5927	46.6699	43.5261	44.5074	63.6843	63.6708	44.4378	39.4159	38.7741	60.2394	52.8586	59.6494	43.8305	53.3905	44.553	57.5027	9.95451	44.7686	8.92481	61.138	49.4805	32.5669	45.1883	53.1262	39.981	22.3972	20.0014	18.0097	17.6798	16.7473	18.0408	18.5148	12.2007	12.9	50.9445	25.2938	21.5905	6.49045	47.1632	13.1778	25.7958	6.70197
YLR216C	CPR6	1115	129.557	116.195	105	159.942	228.272	130.656	190.225	120.946	117.145	193.369	176.282	61.4947	77.1703	113.815	149.084	213.989	265.993	191.684	261.303	205.04	272.386	39.3566	165.043	54.401	219.205	119.074	89.3046	84.3744	67.127	70.7771	27.9306	25.7821	18.0581	22.6644	14.8317	16.3918	19.7234	17.6351	16.0968	60.8159	14.1425	41.0916	9.82986	57.9206	15.0647	50.265	15.6536
YLR029C	RPL15A	614	71.2165	115.988	106	97.6801	125.984	68.0011	78.0067	69.878	107.511	93.376	92.8412	68.3025	71.6704	86.6608	80.6838	80.7616	90.7085	71.5964	87.5376	69.7039	92.8609	11.5367	73.7235	9.14905	80.9698	67.9894	67.1693	83.86	76.1412	75.3155	45.98	38.2107	42.6521	43.9659	51.1417	50.9563	43.018	31.3276	26.1385	50.9445	18.4694	25.2561	6.9357	54.7333	11.662	27.4173	6.88944
YKR071C	DRE2	1046	121.145	115.818	107	125.922	187.099	112.444	154.959	113.404	141.325	177.654	153.217	107.878	113.321	128.493	149.084	140.989	142.713	149.044	140.519	139.807	161.937	97.5674	133.749	85.122	180.48	164.729	147.23	128.362	130.514	103.626	66.9938	52.547	49.5752	89.4895	73.694	84.9931	55.2146	43.7947	49.5316	72.6715	39.4653	41.9347	19.2487	71.6662	43.0597	43.4843	23.7147
YOR302W	YOR302W	77	8.89551	115.526	108	4.5671	10.2931	4.09343	11.4998	6.26993	11.753	7.2782	16.9595	7.55592	16.2705	8.13401	18.0887	5.01076	3.82266	5.85068	4.83135	3.59299	7.01697	8.24049	7.68417	7.8933	11.3827	17.275	13.1455	4.71605	10.7403	5.94312	3.68894	2.25449	3.58258	4.63414	3.77322	4.84827	1.26362	2.50408	3.30963	2.9267	1.91664	5.38846	2.99691	4.33284	3.71204	3.57456	4.52266
YDR502C	SAM2	1154	132.513	114.83	109	68.4134	231.06	59.4801	192.046	44.5256	178.511	129.602	239.662	38.0789	151.934	103.296	221.607	30.8506	70.8785	30.1459	65.6736	36.2492	71.4455	116.422	193.107	80.9063	171.797	311.443	251.122	154.601	125.527	124.265	24.7686	22.9496	22.2217	30.0245	22.0298	23.6477	23.6791	19.0203	14.6301	37.7495	16.6689	20.0876	8.51122	32.0232	17.0754	22.4792	15.9582
YDR033W	MRH1	962	110.41	114.772	110	8.10894	48.4635	6.43253	36.9909	10.0864	51.5399	15.9624	60.4727	20.2738	73.2173	10.6415	51.0689	26.331	149.163	27.0718	135.442	28.2648	137.15	121.366	185.979	80.0093	160.062	187.927	128.402	110.184	113.828	103.626	5.13817	3.52626	2.85638	7.47693	4.03445	5.54088	2.85688	2.87702	1.84286	123.765	78.2046	92.6669	53.893	146.42	124.075	114.754	91.414
YPR065W	ROX1	1106	125.644	113.602	111	108.399	184.74	112.695	188.021	125.853	172.731	129.271	165.137	105.933	133.2	90.6973	169.108	85.6741	86.0895	94.2058	98.101	126.952	132.776	86.2285	87.1986	90.5038	115.705	254.559	195.656	122.875	145.666	114	60.9334	54.6859	51.9474	74.1462	54.7988	73.3177	46.8088	40.6513	47.087	74.0109	41.8176	61.3992	43.8234	71.467	64.0946	64.9686	63.7156
YLR340W	RPP0	938	106.389	113.421	112	128.531	183.239	106.847	134.547	119.129	139.11	114.384	108.928	79.6738	85.9358	105.864	107.186	98.4467	115.635	86.7685	111.203	92.9386	113.092	24.5896	109.472	23.2314	123.098	123.763	92.3578	115.843	110.759	94.2254	64.0295	64.86	54.2228	53.7794	48.2973	56.2333	51.5886	43.7947	43.9654	102.881	45.796	64.7715	20.9955	100.203	30.6244	71.3438	28.1202
YLR264W	RPS28B	203	22.7237	111.939	113	25.6317	25.7329	23.8087	27.0244	23.4441	24.7584	26.3008	22.2896	17.8799	19.7079	16.4515	23.8097	24.0713	24.7677	16.3621	26.5315	17.406	23.7848	6.52647	27.3957	4.75392	31.5665	22.3341	17.6404	23.9232	31.0702	34.1459	16.732	16.8798	11.6192	9.57981	7.89474	9.16884	11.4275	15.131	10.0793	20.3381	7.98599	10.8136	2.29478	21.216	4.08325	12.124	2.20275
YER131W	RPS26B	359	40.1129	111.735	114	41.9428	57.47	34.5018	42.5491	43.7987	42.1953	63.767	61.5388	37.2559	35.5774	39.7527	58.1361	46.0793	50.491	44.2272	53.8	40.8004	59.2341	8.37234	40.2027	5.24725	52.337	41.3366	29.3442	38.5859	45.8381	33.0654	18.6423	15.8971	16.5573	18.0303	15.4992	19.6899	14.5591	10.922	11.6965	33.6819	13.6488	16.9718	4.43543	32.7702	7.51689	18.0202	5.15536
YBL092W	RPL32	392	43.6706	111.405	115	53.4072	66.3693	41.2685	47.8198	45.2526	55.3934	51.8572	48.165	36.433	33.3431	42.0767	45.2637	41.3633	48.1814	35.1041	50.5245	39.2035	48.2075	8.89973	43.7664	7.7139	52.1023	53.7993	49.1048	54.8777	51.8796	49.49	20.7503	20.6951	19.559	19.4712	24.0035	21.339	17.1413	18.1679	13.0881	37.8487	17.5982	19.4278	5.92532	38.0493	11.0743	22.6266	7.33468
YJR009C	TDH2	998	110.116	110.337	116	32.7154	120.301	29.8236	103.69	34.4392	95.7583	32.4211	85.379	39.8743	107.477	25.3194	76.1406	45.4898	149.243	37.6823	118	48.7049	115.552	311.688	229.857	206.033	190.338	199.156	180.73	107.612	107.115	83.5278	23.0559	21.0419	17.4772	16.0442	14.3092	14.3469	17.5258	12.84	10.7187	81.6997	70.4219	33.4305	33.4113	85.9596	139.511	45.6217	99.4985
YDR135C	YCF1	4547	492.502	108.314	117	522.7	756.653	487.87	670.149	473.244	622.525	547.271	663.553	399.716	636.211	412.144	558.813	357.041	521.873	318.019	479.041	341.094	501.577	542.224	603.597	442.832	593.661	697.416	587.986	432.933	381.761	353.67	246.435	202.384	191.087	297.831	204.277	257.123	183.554	168.306	160.667	356.76	295.133	234.966	158.802	350.412	274.784	251.362	201.223
YPL250C	ICY2	410	43.8368	106.919	118	45.8575	78.378	42.1874	71.1069	49.3417	66.5684	87.9174	88.2863	55.061	72.1287	65.0109	95.0706	51.6796	36.9524	43.1364	41.5988	50.222	47.5696	37.9063	43.4323	34.6677	47.4084	52.8121	42.0656	30.097	32.0292	30.2559	25.3615	24.2791	23.4804	32.1274	28.8216	31.2994	21.3716	22.4834	27.8686	14.9311	8.65391	13.3062	11.6109	17.0824	12.7447	15.4406	18.6999
YML063W	RPS1B	767	81.8494	106.714	119	85.0041	107.864	61.4015	81.3608	74.694	85.4503	98.0903	102.823	67.33	71.2121	77.3648	92.3784	86.5584	96.6815	78.7363	96.7089	72.8179	94.1367	17.2061	78.9576	13.3648	99.9801	99.2078	68.5263	92.0916	95.5121	74.1269	39.6561	41.2167	33.9377	34.0356	28.067	34.8284	30.162	23.7088	19.3312	84.676	42.7759	41.6048	12.6555	88.4497	23.4168	43.079	14.107
YCR102C	YCR102C	1106	117.311	106.068	120	51.3566	210.902	38.7623	174.413	42.4356	156.739	115.872	263.115	56.1083	210.428	86.9666	222.028	19.4535	55.4286	16.9571	52.0803	19.0029	53.8575	116.224	168.161	102.389	206.297	149.182	163.004	132.392	114.404	105.463	23.7146	22.1981	16.6057	21.3404	15.9927	25.5936	19.7234	15.131	14.1035	29.8623	14.1715	18.8413	9.16198	28.9354	20.1688	22.2581	13.732
YGL255W	ZRT1	1130	119.608	105.848	121	27.0298	104.969	38.3446	156.588	75.3301	284.289	99.0828	238.208	147.827	397.195	63.4208	158.844	4.61776	5.01724	3.56991	3.93059	4.31158	4.10083	156.701	262.821	35.8338	99.276	367.34	268.847	110.356	74.1273	66.9952	23.9781	32.0832	25.7559	34.9313	27.3704	33.674	27.6348	13.7458	7.52188	8.08564	2.72976	3.22575	0.616507	6.72338	2.04162	2.91124	0.421803
YAL012W	CYS3	1184	125.176	105.723	122	80.437	175.412	59.1459	159.751	48.7964	108.186	124.308	172.793	31.4955	63.5352	99.6875	176.259	122.518	190.735	102.833	187.522	130.785	205.679	79.2406	132.079	116.516	177.195	129.192	120.854	141.139	130.61	106.004	42.5546	39.02	34.0829	57.1284	49.197	57.4207	31.4806	32.3932	34.375	75.0526	28.8076	58.1734	30.3458	62.7515	34.058	63.6788	53.897
YBR196C	PGI1	1664	175.267	105.328	123	158.637	310.939	148.45	250.503	159.111	242.479	168.639	188.88	155.308	183.043	120.053	163.134	135.192	202.123	120.98	190.961	145.396	191.098	138.177	222.395	111.941	226.598	277.51	213.127	156.83	137.418	114.216	93.8704	81.7398	70.7318	74.6135	50.5031	62.5328	68.4551	51.6799	47.3878	118.259	84.0997	72.8726	44.9023	126.748	101.586	85.6789	77.4008
YGR027C	RPS25A	326	34.327	105.297	124	38.4942	54.4679	32.1627	39.6742	38.6192	43.255	48.1354	50.297	37.9292	32.14	40.5477	42.2349	41.7563	47.624	40.1614	41.435	37.3671	49.5744	9.55897	46.4391	7.31027	41.6584	33.3161	30.7859	40.0436	34.6183	33.3895	20.2892	18.5562	17.8645	15.9664	18.721	17.1503	17.0863	14.2786	11.7717	24.2073	14.0844	10.3004	3.56204	23.4571	7.76436	11.8292	3.79622
YER043C	SAH1	1349	141.852	105.153	125	134.497	226.02	118.709	189.267	122.218	193.636	156.15	180.837	120.072	155.887	111.797	158.339	70.4454	105.442	61.0851	94.0067	77.1294	90.8561	56.4968	208.029	33.1877	178.368	284.544	205.579	178.61	159.379	137.448	47.2975	47.2865	35.8742	47.6654	37.6161	45.8112	39.6117	36.3357	26.5522	88.446	32.0311	46.7	13.2206	82.8718	24.6232	50.4124	14.4819
YMR251W-A	HOR7	179	18.7631	104.822	126	4.84672	12.7592	4.59467	13.3206	7.8147	16.5698	11.579	13.7614	10.1743	20.9683	9.78527	15.6488	15.4253	48.8186	14.8746	33.4919	19.5618	35.9961	22.6778	31.4049	15.1139	21.3572	28.0102	16.5379	14.8341	16.9735	21.7194	2.83258	3.29503	3.14686	4.3226	3.57005	3.62796	2.96676	3.88931	2.85831	6.99433	3.16536	9.82387	5.49719	8.31706	6.80541	12.0135	12.9353
YML116W	ATR1	1628	170.25	104.576	127	128.065	238.672	120.547	194.346	135.485	235.061	190.557	247.899	180.22	276.427	136.627	206.379	130.181	230.554	114.336	210.123	101.801	217.617	147.406	195.445	107.098	176.256	175.711	159.442	149.885	150.46	140.258	81.8155	68.155	72.3294	120.76	83.156	103.331	69.0595	58.2331	69.5022	104.072	57.6734	73.6423	39.0283	118.979	72.3849	79.9301	48.5776
YJL159W	HSP150	1241	129.291	104.183	128	124.057	233.74	103.839	183.038	110.133	186.411	133.985	150.116	106.157	140.534	94.6725	129.902	95.8922	141.598	86.8677	131.184	104.676	128.948	113.06	156.913	101.761	152.434	174.724	126.112	128.019	119.87	92.4965	35.9013	34.9735	27.4503	42.2914	29.9826	39.5447	26.1514	22.1105	18.3534	80.4099	49.6583	62.7188	37.7953	102.195	70.9619	80.4092	75.0105
YGL123W	RPS2	764	79.1905	103.652	129	93.2994	128.343	79.446	98.2271	85.5074	107.126	114.218	105.052	76.831	77.5141	87.8228	99.8662	93.0429	94.133	70.5056	91.4682	85.1937	93.4077	15.4921	75.1712	16.0557	94.9341	87.7323	74.7174	74.6851	81.6072	69.5885	41.6324	41.6792	34.6155	38.5529	36.6293	46.7677	29.1731	27.5981	26.1009	61.6096	29.6788	36.6929	12.6726	64.8432	19.4573	39.1359	13.6617
YBR078W	ECM33	1619	167.229	103.292	130	106.535	255.184	95.8197	198.658	104.135	226.005	85.0226	135.385	80.3471	135.263	65.2555	118.039	98.8397	183.727	79.1329	171.226	91.7409	166.402	120.707	223.175	86.6917	191.98	259.495	171.231	172.779	152.762	141.446	54.9389	56.1889	42.2648	54.2467	37.9064	52.1106	40.6006	33.3522	18.8423	153.826	88.0782	102.088	52.4716	160.813	109.815	119.877	85.0869
YEL054C	RPL12A	497	50.8976	102.41	131	52.1023	72.052	44.9442	54.6239	52.7947	50.9619	70.7143	64.2523	43.6897	42.9106	45.1346	57.3789	52.4656	64.1888	44.4255	58.6313	45.9104	60.4188	7.77902	51.0051	6.45815	70.1738	53.5525	38.5036	49.9901	66.2639	43.6549	27.4695	27.5164	21.3502	21.6909	18.9242	24.0764	20.3827	19.0203	17.9773	51.9862	21.1121	23.7532	6.30207	53.6874	12.5281	27.2698	6.35047
YGL189C	RPS26A	359	36.575	101.88	132	41.4768	56.2906	28.4869	43.6033	35.984	42.0026	48.9624	48.2619	30.6726	31.4525	32.6584	44.17	40.9703	44.0402	35.2032	44.3829	40.0019	46.5672	7.97679	36.639	8.61087	43.7706	42.2003	30.5315	35.842	49.1945	30.0398	15.678	17.2844	16.3637	16.4726	16.9505	16.1609	13.68	12.1474	13.0129	27.7293	17.7434	17.4117	6.28495	30.8279	9.71318	19.3837	8.41262
YER177W	BMH1	803	81.3454	101.302	133	38.4942	119.872	32.7474	97.6521	43.5261	82.4639	69.0602	96.0392	53.7144	71.4413	40.7924	78.1598	70.2489	116.273	62.0767	99.4112	70.5822	107.988	86.4922	154.129	59.9621	158.654	133.634	101.432	61.0514	69.2367	47.2208	14.5582	12.9489	11.135	17.1736	12.3936	16.2928	11.1528	7.93845	5.97989	42.214	19.6601	27.0523	11.3369	43.8264	23.8808	30.9918	18.1141
YBR068C	BAP2	1829	184.402	100.821	134	179.329	295.177	160.897	240.632	184.463	296.427	161.692	204.968	182.913	258.38	173.077	195.61	133.129	207.3	134.367	184.001	137.252	191.19	167.249	164.04	135.98	155.016	227.413	212.788	173.036	143.268	157.871	68.5089	69.3112	66.0841	95.2529	72.5039	87.8295	80.0475	64.5732	64.8386	134.728	106.315	104.837	83.3654	159.917	152.812	125.81	123.822
YHR143W	DSE2	977	98.1153	100.425	135	53.6868	148.822	57.6422	140.585	51.6134	124.178	89.6542	132.187	82.2174	137.956	68.4358	117.955	46.3741	96.124	43.4339	86.8006	42.3174	82.1988	100.864	116.933	65.9718	98.1025	169.172	134.339	92.6061	95.8957	76.8283	13.4383	13.7582	10.9414	32.1274	14.6285	26.2532	9.33979	8.36468	5.94228	57.7404	43.0663	43.6209	35.3978	64.8432	62.2077	44.0003	50.6632
YHR071W	PCL5	689	69.168	100.389	136	21.5306	66.1549	21.7202	61.1404	30.2592	63.004	31.594	81.018	43.166	80.264	23.9739	87.6669	47.2583	81.7094	43.7313	67.6389	32.7361	72.0834	72.8459	94.9942	65.1645	102.444	94.5189	77.3465	86.4324	93.0188	94.5496	20.8162	17.4001	17.3804	26.6755	23.7713	23.9115	15.3282	16.7294	17.9397	31.3505	25.8165	35.0433	27.6058	42.1332	48.4112	41.6418	48.8588
YHR018C	ARG4	1391	139.237	100.098	137	199.927	256.792	188.799	209.296	227.081	261.746	212.391	175.991	258.023	270.64	185.431	180.214	108.566	104.008	102.833	95.8082	79.6845	99.6045	90.5795	161.256	72.2506	153.021	210.755	194.469	160.003	132.048	138.637	78.5218	71.1032	67.3913	137.661	109.714	114.281	74.8831	70.1674	65.1771	31.3505	23.3481	54.3978	38.2063	40.7387	31.243	57.0824	50.4523
YOR052C	TMC1	452	45.2246	100.054	138	41.9428	63.4744	34.5018	53.3781	45.0708	40.1722	49.376	66.9658	34.4879	41.5929	27.4599	53.8453	49.6163	88.399	52.7553	90.0761	50.3817	98.6932	54.5191	52.8983	45.8349	63.0156	56.6373	45.7973	26.4956	35.1937	30.58	16.7979	14.4519	12.9263	26.0135	18.3437	21.4379	15.9326	9.32369	12.5991	18.9988	8.33447	11.4367	4.4868	19.6721	12.4972	13.377	8.83442
YGR157W	CHO2	2609	260.94	100.015	139	385.594	504.257	348.944	490.273	320.13	399.699	352.497	296.743	242.837	256.432	255.701	274.443	259.872	297.371	225.202	257.208	271.47	243.042	187.488	347.792	142.976	296.302	370.302	296.495	190.7	183.065	204.876	83.9893	72.7796	63.5182	74.1851	45.685	62.7307	67.1366	55.8356	39.4146	168.161	123.159	116.347	79.1184	154.189	109.753	129.126	112.176
YGR148C	RPL24B	467	46.6515	99.8962	140	51.8226	64.6538	37.5927	42.2616	45.4343	49.7095	65.8346	71.6175	43.8393	39.8742	43.361	61.0808	53.4481	57.4195	51.2678	54.4551	46.8685	64.6108	8.04272	50.3369	6.54785	54.4492	49.8507	44.2707	52.2195	48.9068	54.6767	22.6607	18.7296	18.2518	18.3029	17.4439	20.7123	19.6136	15.6638	12.9752	37.8487	17.2497	21.7371	6.18219	36.107	10.27	22.037	7.54558
YOR167C	RPS28A	203	19.8718	97.8907	141	23.7676	27.77	19.2976	19.7413	21.2633	27.2632	31.1805	23.9371	20.7975	20.3954	23.8516	20.7809	23.8748	27.7939	18.2462	22.519	20.2006	20.0485	6.065	30.0685	5.06786	30.393	23.3212	19.591	19.5502	22.6314	19.4502	10.0787	10.3475	11.8612	10.3587	9.22989	10.2242	11.2627	6.92617	5.67902	16.965	9.17663	6.63478	2.36328	14.7416	3.83578	7.03857	2.34335
YML130C	ERO1	1691	165.152	97.6653	142	176.533	237.493	139.01	211.116	126.035	145.95	222.399	225.997	87.0801	153.309	146.473	195.358	190.998	245.128	164.711	247.3	185.478	266.554	65.9239	199.454	80.6821	239.976	216.554	161.478	146.626	141.926	137.88	49.9325	35.8984	34.8575	70.3298	43.8274	47.955	38.5129	38.4669	40.4677	99.2103	33.2798	61.4725	20.4646	88.2007	30.5006	73.5549	23.3397
YDR258C	HSP78	2435	236.307	97.0459	143	228.635	444.857	194.313	410.829	202.819	255.484	268.797	382.994	125.309	192.725	160.54	304.815	242.088	419.218	228.672	379.466	252.387	395.866	97.963	391.113	114.049	423.507	297.377	208.717	111.985	94.9367	106.22	48.0221	39.4825	34.8575	44.1606	29.6633	27.6054	37.469	31.7005	31.4038	61.9072	15.7977	60.1529	18.8548	64.9926	18.0653	75.25	33.5567
YMR307W	GAS1	1679	161.798	96.3658	144	79.5981	177.771	71.1756	154.001	66.3341	156.739	80.391	128.117	69.4995	102.493	54.3694	116.188	72.1156	154.977	63.0683	152.229	73.9357	154.92	97.7652	203.241	66.6445	212.282	233.459	177.507	171.321	162.639	137.448	44.8602	42.8353	35.1964	36.5279	24.9613	36.9722	28.8435	25.9465	19.933	187.061	115.928	120.049	66.8568	205.785	145.76	150.279	104.279
YLR286C	CTS1	1688	162.447	96.2365	145	35.3251	201.681	36.0055	192.142	36.5292	153.367	67.8196	199.638	70.098	158.867	43.8503	163.639	60.3256	166.604	48.8879	158.534	58.8451	162.939	160.525	201.459	114.767	191.863	307.495	206.936	163.004	144.802	131.397	8.30012	6.9947	5.42228	34.3082	20.6947	30.8376	6.37303	4.47537	2.85831	112.802	107.854	96.5525	79.7692	126.051	139.975	104.915	120.003
YHL033C	RPL8A	770	74.0174	96.1265	146	82.5807	113.01	64.6595	78.1025	79.3283	91.7122	106.113	103.695	82.4418	61.931	73.94	92.126	82.4319	77.3292	77.4471	86.3911	77.369	91.1295	27.3584	70.828	23.7696	99.7454	92.668	68.8655	80.5159	86.2102	62.889	52.8309	46.535	39.5536	41.2399	38.2837	43.2716	39.282	28.0243	31.3286	62.1552	25.2938	35.2999	11.2684	60.0124	19.0861	37.146	11.8808
YHR072W-A	NOP10	176	16.842	95.6929	147	20.319	21.2296	15.2877	16.1955	19.0824	16.5698	33.579	28.1043	19.6753	16.7861	22.5061	26.6703	24.366	24.4491	26.0801	20.9632	22.9153	21.0509	4.28506	21.1593	3.58786	25.5818	17.0282	16.4531	19.6359	22.2478	16.2085	11.4621	11.7927	11.5224	8.33366	8.67841	9.33374	8.07617	5.00815	7.86036	11.7068	3.25248	4.1055	0.822009	10.3092	2.44376	4.12733	0.937339
YDR418W	RPL12B	497	47.2602	95.091	148	54.1528	70.3365	39.0964	59.6071	49.796	61.2699	55.3309	58.3407	38.2285	42.395	40.9147	53.3405	48.2408	56.7028	44.128	53.4724	43.8344	52.3083	9.29527	55.1256	7.57936	66.6534	51.9484	39.3517	43.8164	57.5374	43.2227	27.0083	26.4758	22.2701	20.6394	19.0112	20.7783	20.163	16.6228	16.9994	39.4361	16.5818	23.1301	5.75407	41.9339	9.68225	22.6635	6.3036
YHR005C-A	TIM10	281	26.1788	93.1628	149	29.1735	34.2032	20.8848	24.0537	28.4419	26.7815	38.0451	37.5047	28.3534	27.7286	28.4996	31.7183	28.689	37.8284	29.4517	33.8195	27.147	34.1735	5.07614	38.3095	3.85695	42.3624	37.388	29.6834	35.5847	28.0015	23.6644	13.57	13.7004	13.7978	11.6438	13.6997	12.1372	13.68	9.27041	8.53733	12.8477	2.93304	6.45149	0.873385	12.9985	1.82509	6.92801	0.913905
YFL039C	ACT1	1436	132.883	92.5367	150	158.637	230.845	142.435	180.067	142.664	161.46	155.654	134.61	96.1323	117.789	103.785	120.984	133.031	169.392	114.634	150.427	146.434	154.647	48.9156	183.306	41.8883	174.026	192.863	138.834	115.758	111.718	78.8814	70.1558	64.1085	52.1895	53.5846	37.3259	46.8996	43.2927	41.6636	39.4899	109.429	54.508	69.6468	30.5685	100.552	31.3049	79.9301	29.4324
YDR513W	GRX2	431	39.544	91.7493	151	47.1623	54.8967	35.7549	46.6699	38.1648	49.1315	54.3384	57.5654	34.9368	51.5042	40.1808	46.1892	35.0753	63.5517	32.8233	53.8819	36.8082	48.2075	38.4996	71.8303	34.6677	62.7809	44.298	42.0656	37.0424	41.0433	30.9042	18.5106	13.4113	17.1867	15.5769	12.9451	13.1266	16.8666	12.9466	12.1478	13.3934	5.63375	12.1332	5.75407	12.9487	9.80598	11.3502	8.88129
YDL192W	ARF1	545	49.6909	91.176	152	52.7547	64.2249	41.6026	57.2113	45.7978	55.2971	67.1579	67.9349	39.8743	47.7803	37.4898	61.0808	59.0483	62.1979	46.7063	54.537	49.8227	57.6849	16.6128	78.6235	14.0375	86.4851	55.7735	49.6137	55.9066	55.8113	45.2758	24.9662	25.7243	21.8344	19.0428	21.3913	18.6675	21.8661	19.4465	12.712	32.2433	12.9809	14.6991	4.29842	31.9734	9.24918	19.1257	5.15536
YER145C	FTR1	1214	110.399	90.9382	153	45.8575	125.555	49.1212	136.943	55.8842	138.05	113.97	229.196	105.259	205.444	87.7005	166.079	28.3943	45.633	23.4027	43.2365	18.6835	45.2913	163.887	257.587	107.412	221.2	130.673	102.874	149.627	104.814	105.247	25.3615	25.6665	21.4955	21.4962	15.1219	21.6688	29.1182	15.5572	14.8933	51.2917	23.0577	24.1198	11.217	42.8304	28.3353	32.0973	21.7697
YGL089C	MF(ALPHA)2	362	32.3554	89.3796	154	3.35542	5.89711	0.668315	3.44993	1.09042	3.27544	2.3985	4.94248	1.12217	2.52078	0.795054	5.46866	50.7953	98.5928	38.3765	84.344	55.0126	86.6641	3.49397	33.5208	3.54301	40.1328	12.2159	9.32907	22.637	19.5627	20.4227	0.395244	0.23123	0.0968265	4.24471	4.55689	4.48547	0.21976	0.266391	0.0752188	55.8554	45.07	28.4819	22.0572	59.6637	53.9174	38.9885	29.6902
YDR037W	KRS1	1775	157.868	88.9398	155	130.395	201.252	117.623	169.909	117.311	155.68	156.812	182.484	121.344	137.383	120.237	179.54	131.164	153.464	117.311	172.864	111.622	175.424	50.7614	159.92	49.961	195.853	192.123	174.623	205.277	207.998	175.16	72.132	58.5012	55.4816	104.054	86.581	90.0393	51.0941	46.4053	49.7948	123.864	56.8022	88.7814	37.8124	126.15	55.1239	100.198	47.5934
YDR132C	YDR132C	1487	132.108	88.8416	156	131.328	205.219	113.697	187.542	115.494	148.358	172.857	180.643	107.354	137.956	125.802	168.435	103.752	109.822	98.3707	113.005	105.235	123.754	98.754	138.092	93.419	171.679	197.799	177.083	134.022	151.899	143.391	43.1475	37.5171	35.3901	62.5803	49.3131	54.0895	33.1288	32.3932	37.459	79.9635	42.5436	58.3934	29.13	80.0331	46.8336	61.7625	35.8766
YDL147W	RPN5	1337	117.95	88.2198	157	135.429	181.953	124.307	139.914	127.943	123.311	160.038	168.82	117.528	113.378	99.9321	142.185	142.856	166.365	134.466	153.784	135.416	158.748	51.8821	158.361	35.2059	176.139	154.118	117.122	100.752	109.705	96.9269	59.9453	52.0267	50.3498	50.3914	37.9644	45.9431	43.5124	37.5079	30.9901	73.7132	23.3481	45.7836	11.1485	67.5824	24.3139	46.6167	14.0835
YLR333C	RPS25B	326	28.6523	87.8905	158	32.2493	41.387	22.5556	30.3785	31.5314	30.0569	43.6692	45.7422	23.7151	26.5828	28.8666	39.122	37.2368	35.5189	35.2032	37.6682	24.1129	38.001	4.08728	30.2912	4.43998	34.9695	34.7968	25.9518	30.0112	35.9609	24.853	14.8875	11.6193	12.1517	10.6702	8.91061	11.5765	12.0868	5.96716	9.25191	23.4632	9.14759	9.31068	2.0379	21.963	4.20698	11.9398	2.43708
YOR198C	BFR1	1412	123.517	87.4763	159	148.571	204.469	135.584	173.263	145.844	130.054	191.549	196.536	140.271	105.758	101.583	169.192	181.665	162.702	175.322	174.174	169.749	186.815	42.5869	137.313	34.6677	170.154	157.326	118.394	88.7475	114.308	95.0899	76.0845	66.2474	53.7387	54.9476	42.6664	48.9114	53.2917	52.1594	42.3482	66.7189	25.3809	49.266	15.1558	65.2416	22.1176	51.0388	18.6062
YPR145W	ASN1	1718	150.132	87.3877	160	114.271	152.467	102.837	122.089	131.669	142.385	109.008	111.351	162.939	198.855	92.7766	123.76	103.654	159.915	93.6109	137.816	93.3378	146.901	107.588	192.438	64.3573	168.159	381.901	393.856	155.715	131.857	122.104	59.1548	57.1716	47.7355	93.0722	76.4803	92.4469	55.4893	43.5283	35.917	61.56	45.4766	78.7742	51.701	83.9177	67.5592	93.2702	94.9993
YGR211W	ZPR1	1460	127.422	87.2756	161	136.827	199.215	112.444	167.13	104.499	120.517	180.88	156.997	66.8811	77.2276	128.86	141.849	189.623	169.392	156.778	194.81	192.345	208.322	35.9285	127.179	53.7731	192.919	131.907	114.239	131.278	114.691	101.141	43.0816	34.4533	31.8559	39.6043	30.5631	34.1028	26.6459	30.1555	27.0035	90.331	28.372	64.0384	18.2212	85.2624	25.3656	70.6436	24.1365
YER052C	HOM3	1583	137.946	87.1422	162	158.637	189.351	145.693	172.113	138.302	151.826	179.226	138.196	112.366	116.529	137.911	154.3	180.977	194.796	158.167	181.626	150.187	185.175	59.1338	128.292	70.9948	155.368	173.737	141.463	146.112	133.007	155.71	71.4733	63.4148	54.2713	126.679	98.4231	102.803	52.6324	60.3109	59.8365	83.4359	36.4452	85.2257	38.2748	95.8704	50.0817	95.9972	60.8802
YLR197W	NOP56	1514	131.704	86.9907	163	135.056	173.911	119.628	149.401	129.488	116.182	158.301	153.508	107.055	94.3002	115.099	132.089	134.799	132.519	137.739	130.283	117.211	140.977	25.3807	143.215	20.1369	190.572	169.418	143.837	136.937	195.531	152.9	93.9363	79.6587	66.3262	75.5871	56.9757	67.513	62.1371	56.102	48.2529	124.062	42.7759	64.6982	15.0188	117.335	30.6244	67.8061	14.5522
YPR080W	TEF1	1376	118.671	86.2436	164	154.722	177.021	111.274	123.622	120.583	149.129	149.865	138.002	125.009	114.696	108.678	119.89	125.564	146.615	102.337	140.682	106.432	134.051	64.4077	139.095	48.2567	144.807	157.449	133.151	152.886	133.87	128.587	85.0433	76.8839	73.5397	93.4616	85.9424	88.3902	88.673	58.4995	46.6733	84.4776	65.7755	43.0344	26.2872	85.9596	50.5147	47.538	27.6515
YKR042W	UTH1	1097	93.8286	85.532	165	43.6205	147.321	43.1899	119.118	44.8891	135.16	47.2256	91.4844	52.667	102.493	39.2023	74.7104	44.2126	112.291	35.6991	99.2475	46.7088	98.2376	65.5284	126.399	56.6434	100.097	138.57	91.1705	94.9212	102.512	75.2075	34.9791	36.0719	29.9678	22.4697	15.2961	23.153	28.6237	23.3359	23.1298	66.5701	34.7608	52.3817	29.7807	70.8196	49.5867	59.2566	49.0228
YML123C	PHO84	1763	150.519	85.3764	166	0.0932062	0.10722	0.0835394	0.287494	0.272606	0.0963363	4.21805	8.72203	3.66574	5.55718	2.26284	5.72106	8.35126	12.5829	4.66071	8.92572	5.03018	11.938	162.107	303.803	111.224	283.042	479.998	367.057	347.702	289.701	251.124	3.68894	0.23123	0.242066	5.10144	5.13739	4.84827	0.16482	0.0532782	0.112828	254.226	117.728	40.3585	17.7246	302.602	160.577	51.0757	31.8227
YER124C	DSE1	1721	146.685	85.2327	167	111.661	216.692	99.1613	186.2	114.585	151.826	155.985	233.266	171.317	157.262	97.7304	202.93	119.079	136.421	124.451	134.213	117.131	151.639	140.154	164.931	92.0287	161.94	277.264	197.183	129.22	145.378	129.776	33.2664	29.0194	27.0146	59.4649	45.0175	54.98	25.3273	20.6719	12.1478	80.9556	75.2135	64.1117	53.6704	88.2007	89.8315	63.7156	71.0737
YBR118W	TEF2	1376	116.798	84.8821	168	205.147	203.182	150.956	135.314	153.931	152.597	190.391	163.877	127.553	118.248	137.422	135.623	166.141	168.516	138.235	143.303	168.072	159.659	67.7698	131.633	56.1052	148.914	146.837	119.582	125.876	99.6356	93.6852	69.4312	54.6859	58.4832	59.7765	52.0124	52.2756	58.7857	41.6636	32.4193	64.1891	54.8855	42.7778	22.6566	68.6282	36.5636	46.1008	26.6204
YOL040C	RPS15	428	36.2835	84.7745	169	41.1039	58.2206	31.745	38.4284	39.9822	47.8792	53.4286	46.9051	32.6176	33.1139	37.4287	44.5906	39.5948	47.4647	37.8807	45.038	39.6825	49.6656	6.85609	35.8595	6.4133	43.4186	45.4086	32.1429	31.6404	38.0706	27.4464	18.9058	15.3768	19.4137	17.7966	14.3673	17.3482	13.1306	10.1229	11.6965	28.7214	14.3167	15.5422	4.8293	30.5789	9.15638	19.2731	6.39734
YLR293C	GSP1	659	55.7235	84.5577	170	58.9063	81.2729	44.6936	66.9861	47.9786	59.6322	62.8572	63.5739	41.1461	44.6866	47.3363	61.7538	62.0941	71.5952	51.8628	63.4627	55.7312	68.985	15.6899	66.7075	11.2569	86.8371	73.1719	51.5643	77.1717	67.0311	57.7023	26.3496	24.626	21.4955	30.3361	29.1409	29.9471	19.2839	18.6474	15.2694	34.426	13.3293	22.2137	5.89107	37.1031	9.80598	23.8795	6.3036
YEL027W	VMA3	482	40.5914	84.2145	171	34.8591	53.9318	32.4133	47.5323	31.8949	48.9389	43.2557	42.2534	31.9443	41.5356	30.9459	37.9441	34.9771	48.9778	28.2618	42.172	32.6563	43.1042	11.1411	69.3803	9.23875	54.4492	50.9612	45.458	48.1895	42.5777	36.7393	21.409	20.0592	19.1716	25.1957	15.8475	18.8984	15.548	14.0654	13.2009	31.7473	14.1425	15.8721	4.4868	31.9734	7.42409	19.4943	4.33519
YLR304C	ACO1	2336	196.378	84.0657	172	95.1635	491.497	98.4929	376.905	92.1408	349.123	131.752	268.348	90.297	192.152	104.397	274.695	30.4576	146.376	29.7492	121.521	43.9143	134.78	440.174	308.035	419.107	327.752	254.436	238.824	213.594	135.596	178.942	16.0074	13.5848	11.2319	30.414	23.5681	29.1556	13.4603	8.95074	6.99535	47.3729	43.1244	34.4202	30.7397	71.218	77.7673	52.8077	83.9387
YGR282C	BGL2	941	78.7045	83.6392	173	53.3139	114.833	52.964	99.6646	58.5194	88.5331	74.4361	95.8454	53.5647	79.5192	59.3232	84.8064	60.7186	89.9122	51.6645	90.4855	62.9172	86.0262	34.7419	117.601	32.8738	120.516	121.172	84.8097	79.3154	78.0591	66.4549	23.3853	22.2559	20.1883	35.6322	25.8321	31.926	18.5148	15.8769	16.9994	53.3255	18.0629	30.1681	9.12773	50.2012	11.198	34.0136	8.64695
YDL229W	SSB1	1841	153.024	83.1201	174	141.021	199.108	117.707	175.946	134.304	165.698	156.316	152.151	109.972	106.904	113.876	141.176	113.577	148.606	108.684	147.479	107.151	140.43	37.1811	142.992	35.6544	180.95	213.963	159.527	184.183	185.366	138.637	84.6481	78.7338	66.423	94.9024	70.24	80.7715	60.4889	61.4831	57.2415	174.809	90.6628	106.413	38.5659	163.951	51.0406	100.346	35.9704
YKL216W	URA1	944	78.4031	83.0541	175	26.5638	30.665	18.4622	24.437	19.0824	22.4464	26.4662	25.9723	18.5532	18.8486	20.8549	23.0525	17.4885	13.8571	16.5604	16.8688	13.9727	15.8565	101.655	194.888	94.1365	239.037	196.565	162.75	175.18	195.723	156.898	60.3406	49.0207	42.2648	46.3024	41.8538	46.0091	48.5669	34.7907	35.2024	51.7878	26.2521	20.1976	7.19258	50.1514	24.283	20.9314	5.78807
YDR099W	BMH2	821	68.1635	83.0249	176	88.1731	116.87	72.7628	84.4274	89.1421	82.8492	97.9249	97.6867	80.9456	67.7747	55.4703	78.244	87.8356	104.884	88.851	93.2697	98.4478	104.252	25.4466	95.3282	20.8096	95.1688	94.7657	68.6959	49.7329	54.0852	41.8179	33.7934	29.0772	28.5154	29.5962	22.9296	28.1002	26.2063	23.7621	18.2782	30.0111	12.4291	26.1725	8.30572	33.069	9.55851	28.707	9.63116
YBR025C	OLA1	1184	97.9875	82.7597	177	128.718	179.916	109.938	140.585	105.68	113.773	142.835	113.58	69.0506	71.5558	105.069	103.989	149.34	139.766	130.698	136.342	154.099	140.977	16.8106	102.456	16.7733	123.919	102.663	82.0958	77.6005	75.2781	68.8321	31.7513	28.7303	26.1432	40.1106	30.9404	37.4339	26.536	17.3687	21.2493	87.2058	27.7912	49.3393	12.9466	78.041	18.3437	56.8245	13.1462
YGR169C-A	LSO2	278	23.0056	82.754	178	22.7423	38.8137	21.3025	30.3785	35.6205	24.1804	40.2782	37.4078	29.9993	21.3694	27.5211	38.0283	36.4508	28.5107	35.5999	30.0527	39.6027	37.0897	6.59239	25.7253	5.51634	30.6277	43.1875	31.0404	11.49	25.3165	16.1004	13.4383	11.7349	10.9414	10.787	8.44622	12.8957	5.43905	5.43438	7.37144	8.38327	2.14896	6.01162	1.06176	7.47042	1.51575	5.23286	1.47631
YKL068W-A	YKL068W-A	236	19.4481	82.4073	179	8.29535	15.5469	8.52102	15.6205	10.7225	16.7625	13.1504	23.3557	6.58338	16.3278	12.782	27.0068	16.113	29.7053	14.7754	26.859	17.3262	31.6219	13.844	19.3775	16.7284	18.5409	23.3212	19.5062	20.4934	19.7545	25.7175	8.82711	8.32428	7.35881	14.5255	13.4965	14.149	9.06509	7.24584	8.34929	23.2648	9.81551	8.21099	5.36019	16.3353	9.00171	9.69185	6.65511
YPL237W	SUI3	857	70.4902	82.2523	180	80.6234	104.004	58.7282	73.6943	72.2405	69.0731	100.489	102.338	69.7239	62.6185	65.1332	87.078	90.4884	89.4343	77.7446	85.8179	80.4031	95.048	17.7995	90.4282	15.2036	107.49	85.0176	79.3819	70.998	77.2919	64.2937	40.1831	36.3031	32.4853	32.5168	27.8058	32.1569	32.4695	21.8973	21.2117	50.2996	13.3584	28.1886	5.56569	44.4739	12.5281	26.2012	6.06927
YDR002W	YRB1	605	49.6382	82.0467	181	39.7058	63.796	28.654	46.2865	40.4365	40.7503	66.4963	74.7187	43.166	43.9418	44.4007	67.2225	55.9043	65.702	54.1436	66.5744	54.6932	73.8149	17.338	67.2643	13.7236	87.1892	57.3777	48.8504	56.2496	60.1266	45.3838	24.1758	20.4638	18.0581	26.5587	21.3042	27.9682	20.3278	16.6228	13.9907	28.6222	11.3546	15.5422	4.4183	29.0848	8.47583	17.1726	5.1085
YDL182W	LYS20	1286	105.087	81.7164	182	63.5666	135.097	54.8018	129.66	52.1586	116.567	109.008	162.714	62.0932	132.284	93.6328	178.278	29.7698	56.225	28.5592	61.3336	25.2307	74.3616	108.247	103.681	110.506	145.863	106.241	132.812	200.561	163.119	168.352	61.5922	54.2812	53.0609	60.2827	52.5059	58.641	57.577	54.9831	57.5048	41.2219	28.1397	35.0067	25.9618	45.4699	41.4821	40.6837	49.1166
YGL031C	RPL24A	467	37.7053	80.7393	183	39.6126	58.2206	35.003	41.8783	37.6196	40.9429	45.5715	48.9403	34.1139	31.3379	36.1444	47.2829	39.3001	41.014	38.3765	41.5988	35.6903	45.6559	5.33984	36.0822	5.1127	44.1227	38.2518	38.8429	42.616	45.3586	37.3876	16.9296	15.8392	18.2518	15.3822	17.0376	16.7546	14.0097	11.6146	10.0793	33.4339	15.1879	19.3178	5.48006	34.2145	9.80598	18.5361	5.6709
YMR309C	NIP1	2438	196.034	80.4077	184	228.169	291.425	214.446	271.011	213.632	213.77	237.865	225.61	176.629	151.075	154.546	204.612	235.014	220.36	210.426	224.289	196.576	210.6	53.728	199.343	40.0944	242.909	264.924	212.109	194.559	211.929	181.319	113.764	97.8681	79.3009	97.0443	77.9026	87.5327	74.8831	60.0978	62.8829	163.499	50.9942	105.277	22.023	162.307	44.9776	109.227	22.1212
YLL060C	GTT2	701	56.1254	80.0647	185	27.3094	84.9184	22.5556	59.7988	25.7158	59.8249	53.0978	121.333	31.3459	92.6387	40.67	99.6138	20.2395	50.7299	16.1637	48.0679	19.8013	54.6777	61.9685	78.7349	58.1234	87.7759	62.0666	64.4554	61.4802	39.7967	41.0615	15.0193	14.9143	15.5891	14.6034	13.4675	15.0395	17.6907	14.9179	14.9309	28.4734	17.6273	11.5834	6.04519	31.2761	21.5917	13.7455	11.0606
YDR086C	SSS1	242	19.24	79.5043	186	20.5986	28.8422	18.4622	23.6703	24.0802	18.4002	35.3158	30.7209	22.7426	19.0204	20.6714	26.7544	33.2086	30.7406	29.7492	28.1692	28.1051	28.7058	4.48283	26.5048	4.66422	29.9236	22.0873	16.5379	16.6348	19.0832	14.2635	11.5279	10.5788	8.7628	8.33366	7.74962	6.66225	9.06509	4.74176	6.43121	10.4667	3.7752	5.42512	0.976136	10.4586	2.59843	5.60137	1.35914
YDR276C	PMP3	167	13.2428	79.2983	187	6.89726	19.5141	6.18192	15.7163	8.26904	15.7028	7.77444	13.5676	7.25668	16.6715	5.3819	12.9565	6.77926	16.7241	4.66071	11.7918	6.94644	14.0339	13.6463	29.8458	12.2436	23.0001	20.9768	15.1809	13.3764	12.4664	9.29288	1.7786	2.54353	1.98494	2.64808	3.01858	3.03429	1.97784	1.59835	1.27872	6.25025	3.54288	4.58203	2.1749	7.81904	3.18617	4.60639	3.35099
YDR533C	HSP31	713	56.3346	79.0106	188	15.8451	102.074	17.2927	74.1735	21.9902	82.2712	35.4812	81.3087	25.9595	81.1234	22.3227	63.773	16.9973	78.8424	15.1721	57.7306	20.4401	55.4067	86.8218	123.058	72.43	101.506	86.2516	59.0276	47.5892	44.4956	28.8511	3.09608	3.75749	2.80797	4.59519	3.45395	3.52901	4.61495	2.34424	2.21895	10.2683	7.78271	10.8136	6.13082	14.0444	10.5793	15.2932	13.4274
YDR497C	ITR1	1754	138.438	78.9268	189	124.99	237.814	117.874	184.284	128.943	269.356	127.782	203.805	145.134	314.926	107.332	151.356	32.2261	41.3325	27.7659	35.1297	31.778	35.7227	104.292	280.862	40.9016	131.077	391.402	315.238	136.765	112.39	79.8539	37.5482	37.5171	33.4536	26.987	19.5337	26.8469	31.9201	26.6924	18.6167	24.3561	11.0933	17.2651	6.69595	26.8935	13.982	18.315	9.49056
YLL045C	RPL8B	770	60.754	78.9013	190	63.8462	91.5661	59.5636	63.632	63.7898	67.2428	77.1655	73.8465	53.7892	42.5668	65.9894	73.196	59.8344	67.0558	53.3503	70.5869	59.0048	76.002	11.273	55.9051	9.55268	71.4646	75.0228	60.1301	63.3666	73.7438	59.5392	33.5957	30.8692	26.6757	31.738	32.1304	34.1688	26.1514	20.299	20.4219	53.3255	25.0325	34.6401	10.3094	53.5878	14.4151	34.9349	12.5135
YLR214W	FRE1	2060	161.801	78.544	191	65.8036	168.443	63.4899	246.191	60.155	143.348	235.632	319.129	110.346	228.36	173.811	318.865	34.2893	51.9245	26.2785	56.5842	25.7098	60.4188	110.027	217.05	106.649	265.675	171.022	146.212	238.289	241.178	230.161	45.0578	42.1417	32.9694	78.0404	57.0627	75.8903	37.8536	38.0939	47.8392	81.402	40.8012	65.358	29.9862	82.1746	45.9365	80.6303	40.7039
YDR155C	CPR1	488	37.7995	77.458	192	34.0203	58.6495	22.8063	44.2741	31.5314	48.4572	56.985	60.7635	24.6129	36.6086	36.8783	53.5088	55.0201	58.1363	37.3848	55.1102	47.1879	63.6084	21.4253	56.9074	27.2678	60.434	50.2209	31.21	29.1538	23.7821	20.6388	6.5874	4.45118	5.80959	9.93029	8.62036	9.56461	3.68097	4.26226	4.02421	15.3776	9.81551	11.3268	6.3877	16.8831	9.62038	13.6718	9.56086
YDR171W	HSP42	1127	86.4267	76.6874	193	124.99	173.804	97.6576	149.305	82.963	90.8452	123.15	121.818	27.8297	53.9104	75.897	91.2005	151.797	187.31	135.061	182.691	199.61	215.43	39.027	121.944	53.3246	149.501	92.9148	69.7136	36.4422	25.4124	26.3658	4.21593	3.93091	3.67941	4.90673	2.84443	1.781	3.73591	4.20898	3.1968	15.1792	2.99112	20.8207	5.83969	18.5764	5.62993	24.8008	12.2791
YLR150W	STM1	821	62.8761	76.5848	194	64.7783	96.0693	58.9788	78.39	64.9711	63.582	84.2783	82.4716	59.4748	44.6293	64.8886	76.4772	82.0389	78.1256	72.4889	83.3613	65.6319	86.7552	12.0641	56.9074	9.77692	73.2248	84.6475	66.3212	64.3098	66.3598	50.7867	28.7211	29.8287	26.8694	27.1039	27.3414	29.3205	25.3822	19.0203	20.2339	43.9006	21.5767	32.4408	9.28186	49.3048	13.4871	31.8025	12.7009
YOR007C	SGT2	1040	79.4934	76.436	195	129.091	156.434	96.4045	114.518	97.6838	99.7081	145.564	125.306	60.597	68.6913	104.58	94.8182	121.241	137.377	103.329	131.02	113.858	141.889	19.9749	92.5441	25.3393	108.664	67.7427	64.7098	65.253	45.5504	58.5667	32.6735	25.8399	26.4821	24.3	21.8847	23.12	23.0198	20.0859	18.579	38.2952	12.4001	22.3236	5.51431	35.9576	9.03264	27.3435	6.65511
YDR363W-A	SEM1	269	20.3245	75.5557	196	23.7676	31.5227	16.9585	21.4662	23.8076	15.9918	38.0451	36.7294	27.7549	19.135	17.43	32.812	36.1561	31.3777	30.9392	32.4274	30.1012	37.5453	6.065	27.6185	5.65088	40.4849	20.9768	18.8278	12.9477	23.015	15.6682	13.57	13.3535	10.1184	7.20433	6.4435	6.89312	6.86749	4.95487	7.33383	7.09354	1.97472	3.48234	0.719258	7.32101	1.51575	3.42716	0.562403
YDL232W	OST4	110	8.27762	75.2511	197	9.50703	12.5448	8.43748	13.1289	8.45078	8.18859	13.3158	11.9201	10.0995	7.10402	6.5439	10.1801	11.79	13.459	10.2139	12.5288	11.3379	11.1178	3.62582	14.032	2.24241	10.9133	8.02053	5.76706	9.51785	8.43882	3.78198	5.00642	5.31829	4.59926	2.21971	2.49613	2.37466	4.83471	3.24997	3.15919	5.20854	1.39392	2.78587	0.530881	5.03008	1.36108	2.57958	0.421803
YGL054C	ERV14	416	31.227	75.0648	198	22.8355	42.5664	24.9783	35.6493	30.8953	31.502	40.2782	37.0202	32.5428	26.812	22.2615	33.4009	37.4333	44.5181	34.2116	34.6383	33.295	38.5478	10.4819	57.3529	7.44481	55.036	34.4266	25.0189	31.4689	35.9609	26.1497	15.6121	17.2844	14.1851	12.5394	9.86843	10.3891	11.922	9.11057	10.1545	25.1498	7.46327	12.3898	2.3119	21.0666	4.70192	13.0822	2.27305
YNL209W	SSB2	1841	137.28	74.5681	199	153.417	202.325	121.55	177	124.036	159.918	162.436	154.768	121.942	111.716	126.964	138.483	129.69	136.182	112.254	143.303	119.846	148.085	23.0074	121.054	20.5854	145.98	196.318	143.668	160.774	141.734	115.405	75.2281	62.8367	52.1895	92.3712	69.4273	85.191	51.0941	50.9872	46.4852	127.287	51.6621	77.7845	23.8383	131.778	36.378	87.3741	26.7845
YNL067W	RPL9B	575	42.8569	74.5338	200	54.0596	57.0412	38.8458	44.7532	50.2503	45.1817	60.6241	59.5036	54.3129	43.1397	38.7741	52.6674	50.4023	51.2874	49.0862	46.4301	46.5491	51.0325	20.1727	54.0119	17.4011	63.485	53.9227	45.6276	46.8175	46.3176	44.7355	37.0212	36.9968	25.9979	26.0914	23.6552	27.0777	33.4035	19.9793	20.3843	28.9694	15.3621	17.4117	6.55895	33.069	14.3223	20.1944	8.76412
YOR136W	IDH2	1109	82.5402	74.4276	201	53.8732	173.375	49.873	137.326	56.5203	117.241	56.985	106.603	37.4804	65.4258	42.9329	104.073	30.9488	75.2586	27.0718	65.8374	36.0097	67.6181	184.785	144.551	185.358	162.292	104.637	88.9654	102.638	68.3736	86.5534	10.0787	10.8678	7.06834	17.0957	14.5704	16.8535	8.07617	5.32782	5.15249	23.4136	20.0376	17.7783	16.6457	32.2224	33.7796	25.6852	33.1584
YNL036W	NCE103	665	49.4112	74.3026	202	16.9635	58.3278	15.2042	45.1366	16.9016	47.8792	28.9474	75.494	31.5703	68.3476	10.7026	34.2423	19.0605	47.7036	24.196	33.6557	25.8695	38.4566	37.1811	47.9982	36.0132	36.0257	184.842	103.213	50.3331	62.9076	30.2559	13.7018	14.4519	21.1566	65.7736	71.6912	66.5565	21.042	12.7335	12.4487	17.4114	6.67919	26.6491	9.82986	37.5513	30.5625	15.6617	10.4982
YJR007W	SUI2	914	67.8335	74.2161	203	80.1573	101.43	67.5834	83.8524	77.2383	73.5046	88.8271	86.8326	67.704	51.1604	52.1677	74.7945	82.4319	89.1954	78.9346	80.0039	75.293	83.3835	22.8097	86.9759	17.4908	97.8678	73.7889	57.4162	71.1695	75.5658	69.6966	41.6982	41.3323	34.906	35.3596	32.1885	33.9049	34.3375	29.0899	24.1452	53.9208	13.5326	30.8279	7.20971	51.0479	12.2497	32.5027	7.73305
YPL037C	EGD1	473	34.9813	73.9562	204	38.2145	47.4986	33.2487	40.2492	37.5287	32.2727	51.9399	47.3897	35.0116	26.1245	34.065	43.6652	40.2826	47.2258	40.1614	43.7278	41.6786	52.0349	10.2182	51.896	7.39997	60.9033	44.7916	34.4328	44.7596	47.8519	37.0635	21.2114	20.6373	16.751	14.0192	13.9029	13.9182	21.042	15.3441	13.1257	15.576	5.80799	8.61421	2.19202	14.891	4.42352	10.0235	3.21039
YIL138C	TPM2	485	35.7502	73.7118	205	53.4072	62.831	49.3718	55.5822	53.976	44.3147	79.7294	63.3801	61.8688	30.4785	42.5048	51.5737	61.5046	50.0131	61.8784	47.986	56.2901	58.6874	9.69082	44.7686	9.41814	59.3778	40.843	31.8885	26.7529	34.2348	31.9848	44.2673	37.8061	32.7758	19.3543	15.0058	15.897	28.5688	18.9138	22.1143	12.3021	3.22344	7.00134	1.74677	11.106	3.68111	6.15414	2.03871
YOL139C	CDC33	641	47.1811	73.6055	206	54.1528	66.0476	46.2808	53.5697	53.6125	50.0949	72.6993	70.6484	46.8317	39.5877	48.4371	56.5376	61.9959	66.4984	55.3335	59.6959	56.37	68.6205	15.6899	60.2483	10.8084	73.8116	58.3648	44.3555	46.989	50.6329	43.4388	26.679	25.3197	21.8828	23.7159	20.1142	23.8126	24.4483	14.9712	15.8336	31.2016	10.7738	15.3956	4.24705	30.5789	8.78517	15.5143	4.35863
YPR165W	RHO1	629	45.9909	73.1174	207	47.442	66.3693	42.1039	57.4988	45.4343	50.5766	52.8497	51.5569	40.0239	44.8585	37.4898	48.2084	52.8586	66.8169	41.3514	57.5668	49.2638	53.5841	15.6899	73.1667	14.0824	69.3524	61.0794	47.7479	43.5592	40.468	40.3052	20.8821	17.7469	16.3637	15.6938	13.1482	14.3469	19.8883	12.7335	12.1102	30.3583	9.40895	18.7313	4.8293	27.6903	8.3521	22.0738	6.53794
YBR143C	SUP45	1313	95.9558	73.0813	208	114.457	137.778	94.9008	115.285	102.954	97.7814	125.466	106.506	91.0451	82.7848	87.0889	99.8662	104.538	112.211	95.2966	99.4931	94.2161	107.168	25.4466	116.71	17.0423	130.138	129.809	99.397	92.7776	110.664	85.3648	61.658	54.1656	45.1696	50.8197	41.4184	38.3244	44.831	39.3193	33.6604	85.1224	24.6549	49.7425	11.7821	82.573	21.004	52.2918	11.7167
YDR345C	HXT3	1703	123.608	72.5823	209	35.6048	100.358	24.0593	80.0192	31.0771	77.0691	42.6767	91.0967	25.6602	76.5974	32.4137	89.6861	28.0995	102.017	32.2283	86.8825	40.3213	94.2279	111.148	204.354	79.8748	180.128	209.644	158.425	186.756	152.186	165.543	30.302	26.5914	24.255	47.938	29.6343	47.7571	21.3167	20.5121	18.8047	137.753	128.473	93.3634	73.2958	120.523	145.048	116.229	110.09
YPR035W	GLN1	1112	80.4721	72.367	210	39.6126	63.9032	28.0692	35.9368	37.8922	41.6173	49.5414	73.4589	139.822	80.7223	30.3955	69.5782	66.7119	147.252	66.8366	127.171	61.3203	135.327	61.4411	122.167	38.5695	127.557	161.521	161.987	84.1172	71.1546	84.9326	49.142	38.1529	39.6989	45.1731	40.7218	52.0447	47.1385	24.9342	34.1493	32.8882	24.2193	23.2767	21.3722	39.4438	38.2341	34.7138	41.8287
YNL281W	HCH1	461	33.3069	72.2492	211	41.9428	55.7545	30.5754	45.2324	33.8031	39.4979	59.0527	42.5441	30.6726	29.6192	42.9329	38.3648	60.2274	55.6675	53.8461	44.5467	62.7575	49.4833	16.7447	50.4482	18.0739	61.4901	33.5628	30.1075	33.4411	25.4124	22.1516	9.74935	11.4459	9.15011	11.8774	8.79451	10.4551	8.51569	7.67206	8.46211	19.0484	7.43423	7.11131	2.68866	17.1322	4.64006	10.5763	2.95262
YER165W	PAB1	1733	125.024	72.1428	212	123.964	180.452	115.702	155.63	121.037	127.549	149.947	147.984	110.197	96.0762	110.574	137.894	137.747	141.598	126.831	144.04	128.31	153.006	25.0511	133.526	20.5405	167.22	168.308	125.179	122.017	144.131	110.974	67.7185	61.3337	48.0744	69.4731	54.4795	65.3692	47.523	38.0406	43.8149	96.9781	33.9477	69.0603	18.598	99.506	26.8505	72.3756	22.8242
YNL244C	SUI1	326	23.2878	71.4351	213	34.2999	34.8466	26.3984	20.2204	27.0788	27.5522	39.2857	32.5622	25.9595	27.1557	36.389	30.7928	29.5733	29.3071	27.7659	29.7251	29.7819	31.3485	7.18571	32.964	6.45815	38.9594	29.2441	28.1568	27.7818	23.1109	22.908	15.7439	13.816	16.6542	16.7841	19.3886	19.3931	16.3172	11.0819	10.3426	11.7564	3.89136	6.52481	1.50702	10.7076	2.50563	5.12231	0.984206
YDL084W	SUB2	1340	94.8547	70.7871	214	115.11	133.811	99.9131	128.126	104.317	114.929	130.759	110.479	87.4542	79.0036	80.7897	94.5658	115.837	123.679	109.08	106.781	103.638	112.18	31.9072	115.374	25.0702	133.893	140.915	103.553	94.321	94.1695	81.4748	50.2618	45.3211	41.1029	36.7226	31.7822	29.2215	42.084	37.0816	25.1231	68.9015	26.5716	42.5945	13.3577	61.8053	22.9219	48.7172	16.216
YMR038C	CCS1	749	52.9032	70.6318	215	26.8434	60.1505	17.2091	40.5367	19.5368	46.4341	46.1504	72.7805	24.0892	53.3947	36.2667	63.9413	26.5275	46.8276	24.3944	46.7577	27.7858	51.9438	39.7521	85.4168	39.1525	100.919	78.4778	88.2021	73.9991	63.2911	56.4056	12.1867	10.0007	9.63424	15.9274	15.238	19.558	8.24099	7.086	7.89797	31.8961	13.5907	16.0554	8.45985	27.7401	17.4157	19.4574	12.7947
YNL069C	RPL16B	1045	73.5298	70.3635	216	88.1731	111.295	66.0797	88.644	83.2356	82.2712	84.1128	72.0052	52.5174	57.1759	66.4175	76.2248	74.5719	86.0099	59.2009	79.8402	62.7575	71.7189	15.8217	81.7417	12.5575	90.4749	77.1205	67.0845	83.174	93.5942	72.1819	39.1291	36.0141	29.1448	29.4015	30.5921	32.9484	29.8324	28.8235	23.017	74.6557	31.7697	40.5051	12.0219	71.1184	22.0248	46.801	16.1457
YBR082C	UBC4	541	37.9693	70.1835	217	45.7642	65.0827	34.5853	48.2032	38.8009	39.6906	80.391	63.5739	32.7673	36.5513	44.2784	55.528	60.3256	62.9146	54.5402	59.1227	68.9055	71.1721	10.6797	46.6618	13.4096	56.6788	46.7659	36.553	26.4099	24.1657	19.4502	10.5398	8.09305	9.34376	11.9164	11.3777	10.8839	8.90027	7.29911	6.0175	16.3697	5.45951	11.1801	2.84278	14.891	3.89765	12.4188	2.78858
YBR079C	RPG1	2894	202.897	70.1096	218	233.388	304.505	206.342	267.753	212.633	220.803	258.955	251.776	198.249	150.846	166.655	218.242	237.078	225.378	225.202	234.607	210.789	243.771	54.0576	195.111	41.6192	236.103	299.968	223.134	199.703	223.629	192.989	124.172	110.008	87.9185	109.778	74.2745	91.2596	91.1453	78.3722	75.7453	157.149	53.3755	100.915	24.3349	158.622	45.6581	107.642	25.0504
YOR226C	ISU2	470	32.9012	70.0025	219	19.2005	38.0632	13.7005	33.9243	18.2646	34.2957	37.9624	58.3407	21.1715	44.4001	33.8204	50.9848	18.1763	33.2094	13.3871	28.4968	16.7673	34.9026	31.7753	45.1027	30.138	51.9849	39.4857	46.2213	46.989	36.0568	31.9848	13.7677	13.1801	11.7644	12.1889	13.0902	13.8522	13.2405	13.3728	12.6744	14.7327	6.59207	8.98077	5.30881	16.3851	9.83692	10.5763	9.04532
YLR043C	TRX1	311	21.7608	69.9705	220	21.4374	28.5206	12.0297	22.8079	23.3532	20.7123	34.2406	37.6016	24.3884	19.2496	20.3656	31.8024	33.5033	37.7488	33.5174	32.1817	31.6183	36.634	5.93315	32.7412	3.63271	33.444	25.6657	19.9303	20.8364	22.1519	15.236	10.0787	9.36481	8.7628	8.60625	6.03716	5.87069	7.80147	4.9016	5.22771	10.7147	4.55927	4.80196	1.59264	9.76135	2.87683	5.45397	1.66378
YPL091W	GLR1	1451	101.505	69.9552	221	77.5476	129.093	66.748	102.731	65.9706	102.117	95.8572	127.826	60.971	107.935	71.5548	102.39	66.5154	105.999	60.5892	97.2003	63.7156	101.154	75.9444	149.563	59.4688	154.899	155.105	133.66	109.241	96.7587	83.5278	38.4704	36.4187	33.4051	44.589	29.6633	38.0276	29.1182	23.6022	23.7315	72.5227	39.93	49.3026	25.311	77.3437	47.3904	54.5765	34.5175
YOR383C	FIT3	614	42.9307	69.9197	222	38.7738	83.6318	38.094	94.298	34.4392	62.2333	108.429	151.569	71.0705	114.466	90.4526	107.859	3.04576	3.34483	2.4791	2.78417	3.67283	3.0984	35.4671	82.9668	32.515	65.4799	52.3186	39.9454	27.0959	23.4944	17.181	3.62307	3.98872	2.37225	15.5769	18.8081	23.5487	5.05447	2.4508	2.67027	1.73618	1.10352	2.0894	0.633632	2.78896	1.39202	1.98996	1.05451
YMR260C	TIF11	461	32.1874	69.8208	223	36.2572	42.0303	27.8186	34.9784	32.9853	31.3093	47.3083	45.6453	33.1413	24.2912	30.9459	41.8984	41.8546	39.6601	45.1196	35.8667	41.0399	43.7421	7.38348	41.7618	6.4133	50.8115	37.2646	29.0049	36.9567	43.2489	33.6056	18.5106	16.8798	17.2835	13.6298	11.2036	12.9287	17.6357	14.2786	10.8691	22.5207	7.20191	12.9396	3.76754	21.3156	5.81554	11.0922	4.03056
YGL135W	RPL1B	653	45.478	69.6447	224	43.3409	61.4372	35.003	44.0824	47.706	43.7367	64.8422	65.5121	44.8119	39.3013	41.2205	62.0062	51.9743	62.1182	37.8807	60.5966	45.3515	63.1527	8.04272	47.6641	6.45815	64.6585	51.9484	36.2138	51.4478	51.496	39.4407	24.3734	22.8918	19.3169	21.0289	21.4203	21.6028	17.0863	16.8359	14.5924	35.5173	15.972	18.2548	4.79505	34.0153	9.28011	21.4105	4.75699
YOR344C	TYE7	875	60.8198	69.5083	225	46.5099	51.6801	34.3347	55.103	39.0735	41.7136	46.8948	59.6005	34.5627	50.5302	30.9459	65.8764	62.5854	57.3399	56.3252	64.0359	69.9435	67.8914	67.5061	79.5144	47.7186	83.9034	129.316	115.256	49.3899	52.0713	61.8084	17.5225	14.105	9.77948	10.9817	9.69428	14.0171	11.5923	8.63107	9.06386	61.8576	34.151	23.4233	13.1693	55.0321	50.1435	27.2698	21.1839
YJR109C	CPA2	3356	233.23	69.4964	226	300.963	321.875	295.646	310.494	326.764	336.117	329.669	261.176	364.106	356.92	288.543	280.5	255.745	217.493	240.671	210.041	182.683	215.521	149.384	210.925	125.261	229.062	339.083	314.814	271.13	230.341	272.519	177.992	149.606	140.834	285.564	215.974	240.764	149.327	147.687	137.989	66.5205	46.0283	165.503	94.7537	109.666	75.1998	164.356	122.229
YKL172W	EBP2	1283	88.9005	69.2911	227	101.036	137.564	88.3011	100.144	106.407	84.6796	155.985	139.746	110.122	66.3424	93.7552	120.058	134.996	83.3021	132.087	97.2822	100.683	113.092	17.9972	95.7737	15.383	133.776	121.542	108.981	93.1206	144.131	95.198	81.6837	66.2474	59.4999	52.3385	40.0252	51.451	46.8638	37.5079	44.3415	50.9445	11.7031	28.7385	5.85682	43.1292	11.8476	25.9432	5.2491
YGR240C	PFK1	2963	204.92	69.1595	228	137.106	295.07	124.307	237.853	118.856	218.298	124.805	182.484	111.917	180.866	101.4	158.171	114.658	214.149	102.536	200.051	112.101	201.943	118.861	293.335	91.1765	284.216	372.523	314.983	210.422	191.024	179.05	81.2885	69.0799	57.9991	102.964	73.9842	87.1699	72.0262	50.6143	50.4718	156.901	90.5466	98.7519	42.1109	166.491	87.3877	108.084	70.2301
YNL255C	GIS2	461	31.8574	69.1051	229	39.799	46.5336	31.9956	32.4868	33.894	34.8738	46.4812	36.6325	28.2038	26.8692	35.227	40.8888	39.7913	38.9434	31.7325	38.3233	38.1655	41.1905	10.0864	34.3004	6.45815	48.4645	38.9921	30.1075	39.7863	43.9202	36.4151	19.8939	18.1515	15.5891	19.0039	21.072	22.4933	18.2401	12.7335	12.5239	21.3302	6.76631	12.1699	2.19202	20.4689	4.64006	11.2396	2.57768
YPR158W	CUR1	758	52.3742	69.0953	230	81.9282	97.8921	73.097	80.5942	60.9728	58.2835	110.662	79.9519	40.7721	49.4417	73.5119	72.3546	90.5867	78.2849	84.2894	73.0435	108.668	84.2036	12.1959	53.121	17.0423	61.2554	94.5189	83.9616	26.0669	25.7	24.3128	7.31201	5.26048	4.40561	17.6409	12.3936	13.2256	4.45013	3.46308	3.49767	25.5963	5.14007	14.9557	3.32229	21.5646	5.16593	17.1726	3.77279
YBR189W	RPS9B	1000	69.0109	69.0109	231	74.0057	91.9949	57.8928	78.5817	77.1475	78.3214	92.9625	100.303	61.1207	57.4051	64.1547	87.3304	88.9164	87.2841	81.5128	82.4606	74.7341	96.2327	17.5358	64.9257	13.0957	78.8575	76.9971	52.7517	63.2808	79.1139	56.9459	34.1227	32.0832	33.9377	27.3765	21.6525	27.5725	27.2502	21.1514	24.1828	62.7009	29.3594	33.6138	11.1485	63.3989	19.9213	37.1091	12.3494
YPL225W	YPL225W	440	30.3395	68.9535	232	38.4942	43.5314	30.9096	38.2367	43.7987	33.236	61.8647	57.6623	45.56	32.7129	34.1261	44.7589	59.6378	49.2964	53.2511	47.3309	47.1879	46.0204	10.6138	43.4323	8.56602	47.1737	37.5114	25.9518	19.3787	26.3713	17.181	22.5289	19.0187	17.9129	12.3058	10.4489	11.2137	18.7895	10.7089	10.7939	12.9469	4.73351	8.13768	2.56878	12.8491	4.02138	8.18095	2.20275
YNL327W	EGT2	3125	215.226	68.8723	233	149.037	404.864	156.553	354.001	145.753	320.511	224.714	314.381	214.558	263.479	143.415	269.395	136.666	197.106	126.335	210.123	152.343	233.838	155.053	154.463	103.779	171.21	367.587	276.31	159.917	131.473	122.86	36.7577	28.21	26.5305	51.4428	31.7241	52.2426	23.1846	19.6597	12.0726	143.309	116.828	112.645	87.1501	155.036	151.761	121.425	124.455
YGR085C	RPL11B	524	35.7339	68.1945	234	38.0281	57.6845	31.745	40.6325	38.0739	39.6906	63.2707	55.2395	37.3307	30.3067	36.6336	56.3693	45.2933	49.6149	42.7397	42.5814	45.1119	52.3994	7.77902	36.7504	6.72724	42.8318	33.8096	31.21	35.842	39.509	30.58	17.7201	19.2499	15.347	16.7063	15.1219	15.4683	15.2733	10.8688	10.7563	26.8364	11.0642	14.3692	4.0073	25.6982	6.34141	14.8142	3.42129
YKL182W	FAS1	6155	415.909	67.5725	235	284.652	634.315	282.113	554.097	305.319	548.635	320.902	526.229	328.271	531.255	235.275	463.07	162.899	251.658	147.06	217.575	165.836	223.085	249.39	518.292	142.752	445.92	1001.46	764.984	400.779	378.5	341.675	93.4093	83.763	62.5983	84.3491	70.4142	77.1765	64.884	54.5036	38.7753	248.274	186.03	181.815	101.587	277.601	197.048	206.182	148.756
YAL035W	FUN12	3008	202.268	67.2435	236	244.48	330.238	199.158	265.357	236.168	219.84	300.97	274.259	227.8	159.669	194.727	223.626	271.269	217.971	284.204	238.947	246.159	276.122	54.9146	191.547	44.7137	252.062	337.479	243.404	172.95	219.889	157.871	138.138	113.823	97.117	116.399	72.0686	103.1	75.7072	58.8724	77.024	125.997	47.4513	92.9602	27.3147	137.605	40.2138	94.9285	30.6978
YHR008C	SOD2	701	46.9752	67.0117	237	25.7249	64.0105	21.8038	48.2032	28.351	45.2781	44.7444	64.2523	28.5778	55.7437	30.9459	60.0712	27.6083	66.8169	22.5102	63.0533	29.1431	70.6253	41.7958	64.9257	39.1974	62.8982	68.8532	55.0415	55.3922	43.2489	31.7687	7.839	8.38208	7.21358	13.1625	10.4489	12.368	6.42797	6.28683	6.73208	19.3956	10.0188	16.0188	10.121	19.8713	17.6013	20.0102	24.1599
YER036C	ARB1	1832	122.165	66.684	238	105.509	164.047	89.053	128.701	88.9604	116.182	137.376	144.204	83.4892	90.118	93.9998	122.75	110.04	135.227	98.5691	130.774	95.4936	134.78	16.6788	131.522	16.7284	159.006	177.686	138.918	145.512	144.898	112.703	53.3579	45.9569	43.5235	74.4967	48.9358	62.9286	40.5457	39.3726	36.8948	112.504	30.6952	66.4577	13.4262	105.632	20.076	70.7542	10.1701
YLR346C	YLR346C	305	20.2669	66.4489	239	6.52443	15.4397	5.26298	13.0331	4.72517	13.1981	15.6316	39.346	5.68564	35.2909	14.6168	47.2829	3.53701	14.1757	4.16489	11.3005	5.11003	15.7654	18.4587	23.498	19.1054	31.2144	18.1387	23.2379	39.1003	30.5907	37.4957	4.15006	2.54353	3.48575	3.0375	3.25078	2.93535	3.90073	5.59421	5.82946	9.07774	5.89511	4.98525	3.56204	7.37081	4.54725	4.86435	3.53845
YBR085C-A	YBR085C-A	257	17.0734	66.4336	240	8.66818	23.4812	5.17944	14.758	10.1773	18.2076	9.34587	25.9723	8.67809	21.4266	6.91085	20.8651	7.46701	18.1576	6.44566	15.8861	7.74488	17.2235	13.6463	41.6504	8.61087	33.9134	31.4652	23.0682	18.0925	13.4254	17.5052	4.94055	3.00599	3.82465	4.75096	4.52787	3.56199	4.94459	2.39752	2.51983	4.36525	1.21968	2.71256	0.770634	4.83087	1.85602	3.61141	2.27305
YLR300W	EXG1	1346	88.7669	65.9487	241	17.8956	95.2115	14.3688	70.7235	14.9933	86.8954	19.0226	84.1191	18.1043	85.8212	18.959	59.5664	15.2288	74.8604	13.0897	70.7507	19.2424	79.7383	82.339	137.201	55.5222	128.378	162.879	112.882	116.101	96.3751	81.2586	8.76124	6.9947	7.79453	18.887	13.5546	15.1385	8.35087	5.3811	3.76094	76.2431	50.0939	49.1193	31.8357	93.7288	66.8477	68.7642	57.248
YER048W-A	ISD11	284	18.708	65.8733	242	31.8765	26.1617	19.6318	20.4121	28.0784	25.8181	33	35.9541	27.9045	29.5619	28.8054	27.0068	28.8855	24.9269	24.196	19.3254	23.4742	24.6961	8.30641	28.398	6.90663	30.393	18.7557	16.9619	20.7506	16.1105	15.1279	12.3184	11.6193	11.3771	12.5784	10.5941	11.7414	11.0429	7.40567	8.19885	8.23445	1.97472	3.33572	0.92476	7.27121	2.22723	3.90622	0.984206
YOR096W	RPS7A	973	64.0587	65.8363	243	80.1573	85.4545	65.1607	74.7484	71.4227	72.2522	75.2632	74.0403	51.096	55.5145	65.0721	68.9052	65.3364	77.2496	55.7302	72.8797	51.2599	60.2366	17.7995	73.3894	13.6339	78.7402	71.1977	60.0453	69.7976	75.0863	73.9108	33.464	30.0599	26.8694	28.2332	25.6289	28.4959	34.9967	23.8686	20.1962	66.0741	31.7697	31.4877	9.35036	60.2614	18.653	34.5295	11.3418
YMR116C	ASC1	1232	80.7492	65.5432	244	73.7261	110.115	68.6694	85.6732	70.6958	92.9646	76.6692	78.3044	51.8441	65.8268	72.3499	74.7104	57.7711	85.0542	47.9954	76.5647	50.8607	64.9753	12.3937	98.7806	11.2121	100.919	96.2464	75.1414	102.467	93.4983	85.797	34.7815	36.4187	31.3234	35.2428	30.476	37.8627	30.8213	26.2662	19.4817	88.9916	44.315	45.4537	13.0494	90.3422	23.2931	53.7658	15.3255
YOR210W	RPB10	212	13.8319	65.2448	245	14.913	19.1924	14.7029	15.6205	16.629	13.6798	21.2557	19.7699	13.0171	13.807	14.5556	16.9108	16.6043	17.202	21.7169	11.9556	15.7293	17.1323	4.21913	20.8252	3.54301	21.3572	16.4112	13.3151	15.3486	16.1105	14.3715	8.23425	6.76347	7.26199	6.15289	4.81812	5.11212	7.41689	4.95487	4.51313	9.52419	2.99112	5.2785	0.804884	8.81509	1.97976	5.15916	1.40601
YPL231W	FAS2	5663	368.197	65.0179	246	292.201	638.496	288.044	525.156	303.41	605.377	320.406	486.205	316.152	541.338	265.548	414.861	105.521	166.764	92.3217	156.405	106.831	157.289	179.247	494.794	97.6347	406.14	928.037	731.908	382.343	345.992	297.804	130.233	113.187	92.8082	123.759	87.3066	123.153	93.5077	79.8108	61.1529	158.836	101.291	106.853	53.1224	168.084	106.226	117.334	76.1354
YDR194C	MSS116	1994	128.957	64.6723	247	195.547	213.154	169	192.238	173.923	157.221	198.827	175.991	153.886	118.248	121.399	142.606	166.043	157.924	174.132	162.792	154.738	168.043	62.364	134.083	46.418	157.363	171.639	140.36	116.358	120.637	100.493	105.201	85.3238	73.5881	82.363	53.4637	67.2491	74.6084	54.5569	53.631	86.7594	36.9969	52.1618	17.776	81.7264	33.4703	55.94	17.2705
YKL043W	PHD1	1100	71.0941	64.631	248	43.7137	98.9643	39.7648	110.685	41.7996	87.5697	93.6241	144.398	50.7219	100.201	57.305	129.565	48.0443	73.2677	47.1029	72.3884	70.9814	88.4867	63.7484	64.5916	52.5173	70.6432	105.624	77.8553	51.0191	39.3172	37.4957	8.16837	8.09305	6.34214	10.3976	7.31425	12.368	4.94459	4.52865	3.30963	42.1148	33.3088	29.105	23.3074	45.5197	55.7116	29.1861	39.5557
YDL168W	SFA1	1160	74.651	64.3543	249	58.1607	102.288	44.9442	76.3776	41.7087	82.5602	67.6542	103.308	34.4879	82.7275	59.3844	89.602	46.5706	77.0107	38.079	71.4058	43.1158	79.1915	50.234	105.462	54.3561	117.7	85.141	94.3084	100.923	72.9766	80.9345	23.7805	18.0937	19.9947	28.0385	24.2938	25.4617	21.2068	16.8892	14.8933	48.4642	23.6385	29.7649	13.6488	45.2209	22.7981	31.4709	17.2002
YML091C	RPM2	3608	231.9	64.2737	250	188.183	297.965	187.88	321.514	192.096	205.196	231.331	262.242	153.064	210.027	151.305	293.12	171.545	245.447	158.563	232.069	188.672	281.863	279.056	211.927	227.381	237.863	314.035	257.228	167.034	211.929	202.714	89.3251	68.8487	64.8738	111.881	91.0218	96.5366	66.752	69.1551	71.1194	177.785	144.067	156.669	128.473	195.775	225.94	219.412	266.603
YER021W	RPN3	1571	100.691	64.0937	251	124.244	156.113	106.346	128.222	101.319	123.792	111.737	126.469	85.4343	92.295	73.1449	103.147	104.735	132.439	87.066	121.848	95.3339	123.936	34.6101	131.188	26.3708	141.99	133.141	109.659	94.321	93.1147	82.015	45.2554	38.442	35.5353	40.3053	31.6951	36.6094	38.8425	29.1432	24.7094	68.0087	19.9505	42.7045	9.2476	67.4828	20.8802	48.1276	10.5451
YNL079C	TPM1	599	38.2283	63.8203	252	38.3077	55.4328	32.9145	39.5783	40.3457	38.8235	71.2933	70.9392	51.6945	35.5774	39.3857	52.8357	65.7294	50.4113	64.2583	52.4898	59.3242	72.6302	9.62489	50.4482	9.59753	63.7197	51.7016	41.6416	30.6972	34.7142	28.2028	22.1337	17.6891	19.2201	16.1611	12.6548	16.9854	13.5702	9.43024	10.3802	13.2446	6.33071	10.0071	4.0758	14.4428	5.25873	11.6081	4.8273
YGL028C	SCW11	1628	103.714	63.7065	253	87.8002	177.449	93.7312	148.73	84.3261	131.981	102.391	134.61	121.867	117.904	76.3251	127.883	93.4359	108.309	84.8844	111.121	90.0642	122.478	66.7809	74.7258	51.3961	85.1943	176.575	121.023	89.262	78.9221	74.4511	22.9241	19.4233	15.5407	50.5861	32.6529	47.955	13.735	12.254	7.18339	73.4156	60.6355	57.9168	45.0906	78.8876	76.0041	59.2198	63.0595
YCL050C	APA1	965	61.1572	63.3754	254	95.4431	122.767	75.5196	103.019	82.5996	71.0962	112.481	92.3566	55.1358	48.8115	71.0044	86.0684	117.507	88.7972	100.453	85.5723	116.014	95.2303	9.0975	62.4756	9.82177	84.2555	72.0614	50.6314	43.5592	47.0848	44.7355	26.6131	22.9496	18.6391	19.6659	15.5573	14.9406	18.5148	15.7703	17.0747	34.0291	8.65391	20.051	4.74368	28.3876	6.18674	21.5948	4.66326
YOR204W	DED1	1814	114.897	63.3389	255	124.617	201.145	106.93	154.863	105.408	150.092	119.759	133.738	81.6937	109.482	96.3238	117.787	93.6324	136.74	84.8844	126.925	94.775	143.438	52.9369	143.772	49.961	139.291	122.776	94.3932	89.6907	86.7856	74.1269	18.0495	17.9203	13.5557	36.45	27.0511	34.3666	11.922	13.6392	10.9443	102.484	53.2593	68.2905	26.4584	101.05	49.0609	74.4762	34.1426
YPL135W	ISU1	497	31.2017	62.7801	256	22.3695	50.1791	22.0544	39.5783	22.4445	47.9755	29.2782	41.4781	27.6801	49.3844	32.8418	42.2349	14.148	21.9803	14.1805	24.8119	14.851	25.5162	33.9508	36.5276	35.2507	38.9594	41.7068	44.2707	48.4467	32.7963	31.8767	8.1025	5.14487	8.13343	22.3918	26.3255	27.3086	7.96629	5.43438	6.99535	11.6572	6.12743	11.2168	6.28495	14.4926	10.3937	11.5344	10.0764
YNL131W	TOM22	458	28.5403	62.3151	257	37.9349	42.2448	29.0717	37.4701	37.4379	32.1763	55.4963	45.2576	35.9841	33.6295	29.3558	36.9345	38.8088	36.2356	36.0957	37.5863	41.8383	41.4639	9.62489	40.4254	9.05935	42.8318	37.388	24.1708	22.2083	30.9743	18.5858	19.0376	18.7874	13.2168	11.9164	10.6231	10.7849	10.6583	11.881	10.4554	14.3855	4.70447	9.42065	2.77428	14.393	4.57819	10.7237	3.39785
YML106W	URA5	680	42.3262	62.2444	258	48.6536	58.3278	39.8483	51.3656	47.1608	46.4341	53.594	48.0681	41.1461	31.8535	33.6369	42.2349	49.5181	50.0928	40.3598	47.986	41.8383	50.5768	13.0529	56.9074	10.943	60.5513	57.8712	40.1998	47.4177	47.3725	47.2208	32.5417	30.1755	22.8995	21.3793	16.37	18.0738	22.1408	17.9015	15.0438	33.9299	12.1968	17.485	4.36692	33.4177	9.09451	17.9465	5.1085
YHR193C	EGD2	524	32.5284	62.0771	259	26.3774	46.9625	20.8013	33.8285	29.1688	31.3093	49.2933	50.4909	31.1962	25.437	31.9245	38.0283	42.4441	43.0049	38.674	39.0603	37.5267	47.4784	5.80131	36.3049	5.60603	46.4696	47.3828	36.977	39.7863	36.2486	29.7156	13.7677	14.5675	12.7327	14.3697	14.8026	14.5778	9.94413	9.5368	8.95104	19.2964	7.86983	12.4265	4.12717	17.7298	4.88753	11.7924	4.56953
YOL127W	RPL25	842	52.2612	62.0679	260	56.2033	76.2336	44.61	60.4696	56.5203	61.9443	72.6166	76.6569	50.3479	45.6032	51.2504	67.1384	57.3781	67.5337	53.6477	65.5099	54.2142	72.7213	10.8774	52.1187	9.37329	63.2503	53.1823	46.2213	57.1928	55.5236	41.3857	22.6607	22.7183	21.8828	21.0289	24.6711	24.9999	20.0531	13.5859	15.0814	46.2816	24.1903	19.7944	5.30881	47.5617	11.4764	23.9164	5.99897
YLR372W	ELO3	1037	63.9707	61.6883	261	56.0169	95.426	47.1162	79.0609	51.9768	89.4001	65.8346	71.4237	49.5998	59.353	46.0519	59.6505	48.5356	64.7463	44.3263	58.877	45.8305	58.2317	15.558	95.7737	12.3333	82.9647	78.231	61.4022	64.0525	67.99	52.8397	23.8464	22.3715	19.2201	30.5308	20.0852	29.5514	18.0203	15.9835	13.1257	61.0143	19.7762	34.7134	7.99747	54.2352	13.549	36.4826	8.24858
YOR382W	FIT2	461	28.4296	61.6694	262	11.1847	45.8902	13.1157	52.3239	11.4494	37.2822	37.9624	74.428	26.3335	67.1445	27.0318	59.0616	0.29475	0.398194	0.099164	0.655099	0.239532	0.455647	28.6769	77.7326	24.532	76.6279	37.1412	32.3973	23.323	23.6862	13.7232	3.22783	4.50898	2.32384	6.11395	5.42764	6.79417	6.20821	2.82375	3.04636	0.496051	0.464639	0.549843	0.393879	0.796844	0.58774	0.33166	0.210901
YGR118W	RPS23A	756	46.5529	61.578	263	45.205	63.4744	31.5779	46.574	42.7991	57.8018	52.767	57.2747	41.969	48.8688	45.3181	52.0785	50.7953	60.0476	41.7481	55.1102	41.2794	60.2366	7.25163	56.9074	4.30543	66.0666	46.1489	44.7795	51.4478	49.1945	46.8966	22.5289	20.6951	19.8494	19.8216	16.9505	21.1411	17.6357	14.3318	12.1102	41.5195	14.3748	16.8985	4.17855	37.8999	7.70249	22.3318	4.59296
YKL164C	PIR1	1025	63.0537	61.5158	264	49.4925	127.914	42.8557	89.6023	50.0686	97.107	72.2858	79.7581	52.3678	64.3945	46.9082	65.5398	72.3121	82.9836	66.2416	81.8873	72.8977	87.5754	57.4197	69.3803	40.5428	66.536	81.686	60.7238	46.1316	41.4269	35.6587	12.2526	10.3475	11.3771	15.538	12.2485	15.996	6.75761	6.65978	4.4003	37.2535	26.0489	31.0478	19.0603	40.7885	33.7796	36.9248	33.3458
YLR048W	RPS0B	1117	68.6836	61.4893	265	76.6155	107.006	60.3154	80.4983	69.5145	86.1247	80.6392	78.0137	52.2181	57.6342	65.2555	72.1022	68.4804	76.931	56.226	68.4578	60.2823	75.7286	13.5803	71.1621	11.3915	89.7708	78.4778	56.9073	72.6272	79.018	59.4312	36.4283	33.0081	28.3218	29.2457	24.555	27.7704	23.5692	19.9793	20.6476	64.1891	25.5552	39.5887	9.96686	65.142	16.1474	42.2683	13.568
YHR082C	KSP1	3089	189.575	61.3711	266	274.679	378.38	255.129	364.063	217.903	219.936	297.414	262.63	166.679	154.627	185.125	220.934	314.597	297.212	281.527	296.842	313.468	318.497	41.3343	178.74	37.538	209.465	265.418	198.116	104.782	107.595	98.6558	68.3772	55.553	42.41	55.2981	35.2071	45.7452	43.7322	41.1308	35.9546	95.7379	23.0577	75.4752	14.4708	89.9936	17.725	80.7409	15.1146
YLR175W	CBF5	1451	88.9967	61.3347	267	89.2915	120.516	67.834	91.4231	73.8762	87.4734	123.978	107.669	80.4219	70.8684	86.9055	101.549	101.787	88.4787	98.4699	108.501	83.5968	104.981	15.0966	88.535	12.109	123.684	117.964	108.556	94.4068	114.883	83.3117	48.615	39.8294	41.2965	54.7529	41.0991	48.9114	32.1399	24.9875	29.561	74.2589	20.5603	43.5842	8.25434	70.6203	16.0237	48.017	8.88129
YGR254W	ENO1	1313	80.4805	61.2951	268	16.4975	91.5661	14.9536	74.7484	18.9007	94.6986	21.5038	53.4951	29.2511	105.816	16.4515	49.218	19.257	104.247	16.0646	83.1975	28.2648	83.4746	213.989	173.395	129.298	95.1688	210.878	162.495	72.9702	54.7564	56.2975	8.23425	10.1741	6.1969	10.3587	8.06889	9.26778	10.1089	5.00815	4.28747	40.8746	40.5108	20.4542	21.749	44.4739	79.809	32.5764	80.8689
YGR159C	NSR1	1244	76.2239	61.2732	269	63.753	76.5552	53.1311	57.5946	42.7991	72.7339	61.1203	69.3886	45.0363	48.1813	58.7728	64.6985	48.4373	46.0312	43.533	61.3336	35.2113	56.8648	21.0957	65.1484	17.5357	96.4596	84.4007	74.7174	157.602	144.898	114	49.6031	44.5696	38.2465	65.6957	65.3638	66.1937	37.3591	35.0038	36.6316	92.464	36.1838	41.7514	11.2341	86.1588	37.0586	46.285	11.5996
YCR021C	HSP30	998	61.0438	61.1662	270	37.0029	114.726	35.4207	121.706	35.1662	88.4368	64.594	102.726	23.7899	88.0555	39.3246	89.6861	18.471	69.6043	20.1303	53.5543	22.1967	59.143	53.9917	103.347	58.9755	86.7198	83.7837	70.9009	50.7619	39.6049	53.7042	6.38978	4.74021	4.40561	3.38798	1.74149	2.20976	3.90073	4.74176	4.28747	12.4013	5.14007	10.3004	4.60668	10.6578	7.02195	10.6868	7.68618
YEL040W	UTR2	1403	85.5538	60.9792	271	68.1337	163.511	57.0574	126.977	61.0637	153.849	62.8572	103.308	66.0582	102.836	43.9726	90.4433	36.1561	70.2414	28.9559	61.088	34.4128	61.0567	51.0251	98.5578	32.7841	88.2453	128.822	107.369	82.0593	78.0591	70.453	21.409	18.1515	17.9129	13.3572	10.4489	13.7203	14.1196	11.295	8.53733	63.2466	41.2658	36.5096	20.516	70.4709	61.5271	42.4157	28.5654
YKL082C	RRP14	1304	79.495	60.9624	272	96.282	132.203	83.1217	97.9396	107.77	83.6199	140.353	128.02	102.716	64.3945	96.385	115.767	121.928	77.7274	142.697	91.3863	111.622	116.555	17.7335	66.3734	13.6339	98.4545	114.138	102.365	71.8555	118.527	84.2842	70.7487	53.8766	47.1545	56.739	42.173	54.3534	39.9963	30.3686	37.0453	42.1148	11.2675	23.6066	5.03481	37.0533	10.1153	21.779	3.91339
YBR109C	CMD1	443	26.9825	60.9085	273	30.9445	38.0632	26.1478	36.0326	34.2575	29.2862	42.0978	39.9275	26.4083	23.6037	21.4664	33.4009	31.6366	33.9261	32.7241	33.4919	33.1353	34.1735	11.3389	40.7595	9.32844	45.2961	33.0693	20.0999	24.009	30.303	27.6625	18.1153	18.325	13.6525	9.54087	7.98182	8.77306	14.3943	11.0286	10.1545	14.5343	5.43047	9.05409	2.32903	14.5424	3.80485	10.6131	2.34335
YNL287W	SEC21	2807	170.797	60.8467	274	200.859	276.735	197.738	256.349	197.821	205.485	205.278	197.409	157.477	147.179	119.013	170.538	192.374	209.53	186.131	194.81	184.999	207.137	58.7382	209.143	42.875	219.088	275.66	187.005	137.451	144.323	124.049	99.0086	87.8674	67.8754	64.4106	42.5794	50.2637	69.3891	57.3806	50.9607	115.828	42.863	83.4662	20.8414	116.837	34.5839	90.1747	23.3397
YML058W	SML1	314	19.0923	60.8035	275	16.0315	37.956	13.5334	23.862	12.8125	34.1994	12.0752	16.1842	10.698	21.1975	11.0084	11.8628	10.7093	24.8473	9.81724	20.1443	13.4138	21.8711	11.8663	27.9526	11.3466	24.4083	26.1593	22.2201	21.2651	14.7679	13.6151	6.71915	6.24321	6.24531	7.39904	5.07934	7.18995	7.14219	5.16799	3.23441	12.5501	5.95319	7.25793	3.69904	14.9906	8.50677	8.40206	5.29596
YDR071C	PAA1	575	34.9124	60.7172	276	41.2903	57.7917	34.7524	44.0824	39.0735	35.9335	55.8271	53.4951	39.201	32.8847	38.9576	45.9368	46.8653	57.4992	45.6155	46.5939	46.0701	51.7615	9.49305	50.0028	7.22057	50.3421	41.0898	36.4682	30.8687	30.1112	29.0673	18.1812	16.1283	13.943	14.2918	13.2643	13.0606	13.1856	10.5491	9.92888	17.0642	4.03656	9.7139	2.0379	16.3851	3.00057	10.4289	1.99185
YER025W	GCD11	1583	96.0344	60.6661	277	128.625	166.62	103.088	127.839	113.495	116.663	141.677	121.333	105.633	82.0973	98.2808	108.195	110.433	103.61	118.005	103.424	105.793	113.73	21.9527	90.0941	20.4957	116.526	137.336	119.242	109.412	101.17	78.3411	58.4302	55.2061	45.218	54.5582	40.4606	48.5487	43.3476	35.5366	33.8861	67.5622	22.9416	44.2441	10.5149	66.2875	16.6114	41.7155	9.77176
YDL243C	AAD4	989	59.9217	60.5882	278	42.2224	125.34	36.9244	99.3771	34.2575	89.1111	69.8873	129.764	34.862	103.581	45.5627	94.4817	13.4603	52.8801	15.0729	46.5939	11.9766	43.7421	48.1904	81.2963	42.875	79.5616	53.4291	38.0796	74.8566	49.7699	51.435	44.0697	38.8466	35.7774	27.3765	23.2198	22.3614	35.9856	31.6473	30.426	21.1814	9.61223	11.6933	6.74733	23.2579	12.59	14.2245	10.8497
YLR136C	TIS11	857	51.6103	60.2221	279	9.78665	30.4505	13.9511	70.8194	22.2628	42.1953	93.7895	189.753	67.2552	131.081	58.1612	149.084	5.01076	5.81363	4.66071	5.65023	4.39143	7.65487	92.2276	101.342	46.104	90.9443	68.7298	42.7441	53.6772	45.6463	49.0577	4.61118	5.14487	2.66273	18.4197	14.6865	19.558	6.53785	2.29096	5.22771	9.37537	5.08199	4.61868	2.5174	16.5345	8.19743	7.33338	4.85073
YBR011C	IPP1	863	51.8202	60.0466	280	63.6598	85.2401	50.4578	67.0819	54.5212	63.004	75.8422	68.0318	50.7967	46.0043	60.9133	67.2225	72.9016	73.5066	61.3825	75.6639	79.7643	80.1028	13.0529	49.8914	12.6472	69.1177	69.4702	54.9567	51.2763	44.8792	39.3326	40.5784	34.6845	31.9527	43.8491	43.5662	41.5566	30.0521	27.4383	25.8753	30.4576	12.1968	20.894	6.7302	26.1465	6.99102	19.1257	7.45184
YEL026W	SNU13	380	22.6259	59.5419	281	21.4374	35.4899	20.4672	27.0244	22.6263	25.5291	33.7444	26.4568	20.2738	20.2235	21.5276	20.5285	25.2503	23.0156	23.601	24.8938	23.7936	24.2404	4.48283	28.0639	3.94665	33.092	24.185	20.0999	30.9544	31.3579	23.1241	14.9534	13.1801	11.0866	13.9803	14.3673	12.9617	14.0097	11.4015	9.85366	19.1476	5.77895	9.89718	2.48315	18.676	4.36165	10.4289	2.39021
YNL121C	TOM70	1853	110.259	59.5032	282	145.774	181.845	129.068	166.651	144.481	130.728	170.707	152.926	127.179	106.675	101.278	131.669	154.449	142.872	147.259	148.052	140.925	152.915	38.3018	122.835	25.5187	136.945	162.138	109.659	84.2029	92.0598	78.3411	60.9993	58.0387	48.9942	48.4443	31.0565	38.1595	38.6228	34.4177	34.375	63.0977	22.9416	47.5065	13.7344	60.4606	19.8285	50.3018	14.1304
YDL126C	CDC48	2507	148.486	59.2287	283	191.259	264.512	160.229	218.016	162.746	202.114	183.94	193.338	154.859	169.007	131.49	160.779	132.736	185.479	119.394	173.847	130.306	170.868	83.7893	192.327	61.7561	184.94	227.166	167.923	120.731	108.362	96.7108	70.6169	63.2992	58.7737	74.3409	52.9703	62.9945	50.9293	40.5447	37.3085	80.4595	33.4831	64.4416	20.7557	84.4157	29.3252	68.2115	26.9719
YPR132W	RPS23B	802	47.1303	58.766	284	51.077	61.0083	36.5903	46.574	41.9813	64.2563	61.8647	63.6708	39.2758	48.9261	50.6388	59.1457	50.3041	58.4548	47.9954	59.1227	47.9863	57.7761	8.37234	53.7892	8.56602	62.0768	45.4086	46.8998	49.9901	48.2355	42.1421	21.4749	18.4406	22.8511	21.2236	17.7632	23.3508	17.2511	13.9056	10.6435	41.1723	21.9833	21.6272	6.91858	36.9537	10.5793	20.2313	6.63167
YBR162C	TOS1	1367	80.2933	58.7369	285	63.0074	114.618	61.485	99.2813	63.9715	90.6525	69.7219	79.1766	56.9312	70.6392	48.6817	71.345	65.8276	85.7709	59.7959	83.7707	62.518	75.0907	53.6621	109.917	40.0944	117.465	126.107	87.7781	81.3733	74.3191	70.3449	30.1044	30.4067	21.0114	40.4221	30.418	35.6859	20.3278	19.6064	12.6744	66.5701	36.9388	48.7528	23.393	65.2914	32.5423	51.481	25.1441
YLR180W	SAM1	1148	67.3644	58.6798	286	19.9461	72.9097	23.9758	68.2319	12.7216	52.5996	32.5865	61.3449	8.82771	29.6765	29.05	60.4918	36.2543	84.4171	32.5258	89.421	40.7205	88.1222	39.6862	66.262	51.2167	92.5872	82.1796	73.53	101.266	85.0595	73.2624	16.2709	15.3768	11.5224	18.225	13.8739	19.3931	12.7461	10.922	12.1854	61.8576	23.4933	41.5682	18.05	54.7333	28.2425	50.3387	31.8227
YPR133W-A	TOM5	152	8.906	58.5921	287	11.8372	18.8708	10.693	12.9372	11.9038	10.5007	14.8045	12.6954	8.00479	9.96855	10.6415	9.5912	11.2988	13.6182	9.02393	11.0548	12.2162	9.65972	2.70288	11.5819	2.87029	12.3215	11.9691	7.20883	9.00337	10.5485	6.26729	4.8088	3.69968	5.27704	4.08894	3.512	3.33112	4.61495	3.19669	2.48222	4.61328	1.48104	2.23603	0.291128	4.03403	0.958945	2.13737	0.562403
YJL148W	RPA34	701	41.0615	58.5756	288	50.4246	58.1134	38.7623	46.6699	40.4365	38.2455	65.2557	66.9658	49.7494	32.9993	46.847	62.511	55.3148	40.3769	62.7708	44.9561	46.1499	56.5914	8.96565	36.0822	7.31027	55.5054	40.7196	42.2352	45.1026	59.3594	46.4644	27.1401	26.3024	22.3669	26.5976	21.5364	24.835	21.042	19.9793	18.8047	32.0449	7.11479	18.2915	2.94553	27.6405	5.81554	16.4356	2.76515
YGR264C	MES1	2255	131.494	58.3123	289	159.662	180.237	138.174	167.417	134.304	146.335	155.572	153.12	121.344	113.263	115.344	150.683	133.817	140.085	128.913	130.856	116.493	146.536	34.1486	143.549	23.5902	163.934	192.246	142.65	122.703	143.556	140.258	75.5575	66.363	54.2713	77.651	60.894	66.1607	58.0715	49.975	50.4342	109.627	36.2128	66.1645	16.6971	106.329	29.1395	74.6973	16.7549
YJL124C	LSM1	518	30.2036	58.308	290	35.3251	50.1791	29.2388	40.8241	38.2557	33.8141	47.7218	49.0372	34.7872	26.9838	27.3376	40.2999	41.6581	42.2085	44.723	39.3059	41.1996	47.2051	11.6685	36.9731	9.37329	36.3777	41.2132	32.3973	28.725	29.2482	23.7725	14.8875	14.105	12.9263	10.5923	11.5809	11.0158	15.8227	8.73763	9.10147	14.2863	4.58831	9.16405	2.4489	14.1938	4.17605	10.2078	2.64798
YBL076C	ILS1	3218	187.552	58.282	291	222.949	288.744	210.018	240.441	195.549	223.211	213.301	203.999	163.986	176.798	174.851	188.038	190.409	205.787	163.522	201.607	171.984	204.221	38.7633	191.77	35.6544	222.608	280.965	223.982	197.56	186.038	167.38	98.4157	77.5198	67.5849	121.227	90.0349	113.819	60.9833	59.9913	54.5712	141.92	49.6293	100.035	27.7257	146.47	36.9348	109.153	28.0733
YLL028W	TPO1	1760	102.366	58.1623	292	25.3521	153.647	22.3886	132.056	18.9915	135.064	32.6692	108.541	26.4083	128.904	28.9889	119.974	45.0968	120.016	43.6322	99.7388	50.1421	115.826	60.4522	108.469	55.6119	110.659	137.213	145.788	105.554	80.84	92.3885	5.00642	4.04652	4.26037	7.04856	4.46982	5.80473	4.28531	4.31553	3.53528	63.1473	30.6372	54.2512	28.1196	63.6978	40.9872	62.6838	45.8593
YER148W	SPT15	722	41.8146	57.9149	293	52.9411	61.2227	39.0964	47.9157	43.0717	46.7231	52.188	57.0808	36.2834	45.3168	44.523	48.629	38.8088	46.9869	39.7648	46.4301	39.1236	49.4833	20.3705	55.4597	19.2399	63.6023	52.0718	50.8858	52.9055	45.934	39.4407	22.5289	19.3655	20.1883	27.6101	25.3967	25.6266	22.4155	16.1433	14.7429	24.4057	10.5125	15.1024	4.50393	23.6563	6.40328	14.2614	4.71013
YHR143W-A	RPC10	212	12.2355	57.7147	294	16.0315	20.5863	12.1132	15.0455	14.0846	11.6567	20.5113	16.1842	12.9423	10.8279	13.6382	14.5551	12.2813	16.4852	16.9571	12.7744	13.334	12.667	4.02136	19.3775	3.58786	21.5919	12.2159	11.3645	16.9778	13.4254	15.236	8.16837	8.55551	7.64929	7.71058	6.53058	6.82715	9.28485	6.34011	5.64141	8.6809	1.97472	3.18909	0.633632	6.97239	1.70135	3.3166	0.515536
YIL078W	THS1	2204	127.059	57.6492	295	159.755	183.561	136.754	149.593	137.121	144.697	169.384	149.341	119.922	107.534	120.481	131.921	142.266	137.855	127.624	133.558	128.15	138.517	30.1932	121.722	25.0702	165.108	185.459	142.904	139.338	142.501	133.342	74.767	67.8082	55.1911	80.0265	58.3108	67.8758	53.1818	44.4873	44.2663	97.5733	39.0007	69.4269	20.242	97.4142	28.0569	69.7224	20.5746
YKL040C	NFU1	770	44.3372	57.5807	296	45.1118	60.0433	37.4256	54.9114	43.1626	41.9063	62.3609	60.4727	43.166	49.5563	43.361	58.3885	50.5988	61.0829	45.8138	53.2268	51.3398	58.6874	26.0399	59.5802	21.0338	65.8319	53.7993	52.4124	40.6438	48.8109	45.4919	23.2535	24.3369	20.5272	25.7019	23.5972	22.9881	20.2728	19.1269	15.6079	26.638	11.2094	14.9924	4.3498	21.6642	9.06357	14.114	5.2491
YKL180W	RPL17A	860	49.4246	57.4705	297	58.1607	73.7675	41.8532	61.6195	51.7042	63.582	55.9925	54.5611	37.7796	37.7544	42.3825	53.1722	48.6338	57.3399	44.0288	58.6313	43.4352	54.1309	8.43826	57.1301	7.53451	55.9747	53.4291	49.9529	57.7931	55.3318	46.2483	24.4392	26.129	22.609	20.6394	17.2988	19.2941	23.0198	15.8769	16.6986	42.6108	17.5111	25.2928	6.19932	43.2786	11.1671	26.8276	8.95159
YGL058W	RAD6	518	29.7423	57.4176	298	34.3931	42.7809	26.8997	32.2952	31.2588	33.236	49.7068	47.3897	29.9993	26.9265	29.8451	43.4969	40.2826	35.2003	39.3681	38.7327	38.7244	44.1067	11.1411	39.8686	8.29693	49.1686	39.7325	29.9378	30.1827	30.5907	27.7706	17.5225	17.5735	12.7327	13.4351	10.0136	11.2467	14.5591	10.9753	10.1545	14.3855	3.57192	8.10102	2.3804	13.8452	3.68111	9.13908	1.85124
YJL111W	CCT7	1652	94.5476	57.2322	299	121.075	144.211	106.93	125.827	104.681	113.388	118.436	120.461	95.5338	79.9775	84.1534	102.222	106.896	109.424	110.667	109.975	103.797	120.382	33.4894	116.376	26.1465	129.2	127.465	96.0046	93.635	95.1285	85.689	56.7834	52.7782	44.0561	45.212	32.3917	36.0157	39.6666	37.0284	30.2003	63.197	19.3116	41.3482	10.0696	62.7017	20.3544	50.6335	12.326
YGR086C	PIL1	1019	58.3012	57.2141	300	32.0629	84.0606	27.1503	75.5151	35.7114	64.8343	46.5639	65.3183	32.9917	56.5457	28.7442	57.6313	42.2476	79.6388	39.269	70.1774	45.1119	78.2802	64.2099	95.7737	43.5925	95.2862	103.897	75.0566	44.5881	38.3583	34.9023	10.6716	7.97743	5.858	9.50193	8.91061	8.872	7.25207	5.70077	5.30292	26.2411	16.5818	25.9159	15.2585	30.8279	24.9016	29.7389	25.1675
YMR108W	ILV2	2063	117.949	57.1736	301	134.217	174.447	125.142	141.735	119.129	129.38	137.541	118.91	88.1275	89.3732	114.06	114.085	139.319	143.668	128.12	144.204	122.321	151.093	30.6546	123.392	39.6459	162.057	163.619	131.794	144.997	133.007	119.619	87.3489	73.7045	66.1325	145.177	110.875	122.592	66.6421	69.901	75.3692	79.3682	26.862	60.5194	18.5637	83.4197	29.0467	62.6838	26.1986
YPR102C	RPL11A	524	29.8353	56.9375	302	35.7912	34.2032	23.224	28.7494	29.9866	29.9606	44.9925	45.6453	29.4756	25.6089	28.0715	40.7205	39.5948	43.4828	33.8149	38.2414	38.3252	44.2889	7.51533	33.2981	6.23391	41.7757	31.2184	23.4075	32.8409	33.7553	28.4189	13.7677	14.4519	12.4422	11.449	10.3909	12.6649	13.1856	10.1761	8.3869	23.7113	11.7902	11.2168	3.85317	24.1543	6.74355	13.1927	4.21803
YDL014W	NOP1	983	55.8619	56.828	303	67.2949	86.3123	54.4677	62.0029	52.7947	67.0501	71.4587	66.8689	46.0836	45.8897	58.467	62.6793	63.9609	54.6322	53.0528	56.9117	52.3778	57.3204	7.7131	59.8029	6.503	69.8217	66.3853	60.3845	67.4824	68.3736	56.4056	29.5115	30.1177	27.9344	36.7616	30.3309	34.8284	24.1186	23.6022	19.9706	52.4326	11.5579	29.7282	5.13756	46.1672	10.9505	29.96	5.71777
YHR027C	RPN1	2981	169.392	56.8239	304	217.636	284.026	183.035	242.549	196.004	198.742	195.354	223.575	168.998	162.189	141.581	164.312	185.103	212.795	176.611	207.584	173.102	217.526	65.9239	196.225	47.3149	212.399	260.112	195.741	138.995	139.336	117.998	96.5054	81.1617	67.3428	89.4505	58.1657	70.5143	58.2363	50.2946	49.3435	101.74	38.4199	78.7376	22.2456	112.953	34.2127	84.7208	26.3158
YOR312C	RPL20B	944	53.3104	56.4728	305	50.7042	70.5509	40.1825	58.6488	56.1568	52.118	69.97	71.6175	43.3904	45.0303	53.4521	64.5302	65.0416	73.9048	56.3252	70.2593	55.332	68.8027	10.2182	52.7869	8.20723	61.2554	60.0923	42.9985	55.5637	58.5923	47.3288	26.2837	22.834	21.205	20.7173	19.7078	20.4155	21.3716	14.3318	14.0283	55.8058	23.1739	25.2928	7.43233	49.5538	14.1058	28.707	9.23279
YOR261C	RPN8	1016	57.354	56.4508	306	66.7356	84.2751	58.227	75.3234	65.9706	58.5725	83.8647	84.8944	61.794	50.8167	48.4983	68.5686	76.7334	78.8424	78.8354	79.1851	66.6699	80.3762	26.7651	75.728	18.3878	86.7198	67.4959	54.1086	52.3053	59.8389	51.9753	30.3679	28.5569	23.0447	25.3125	20.4335	19.6899	23.4044	17.2089	16.4353	34.8228	9.96071	21.224	4.96631	31.7244	10.9505	21.1157	6.46764
YIL075C	RPN2	2837	160.101	56.4332	307	179.608	260.974	162.902	220.029	170.288	174.369	187.166	209.813	142.291	158.179	127.147	155.983	167.615	208.415	154.795	204.309	156.894	214.61	70.3408	197.004	55.2082	223.547	223.094	179.288	135.136	135.117	109.57	79.5758	67.0567	55.0943	73.3284	47.6297	62.8626	50.8744	41.3439	41.8216	100.252	37.81	72.4327	19.4028	105.632	32.3257	82.436	20.9964
YLR388W	RPS29A	170	9.59125	56.4191	308	8.38856	14.4747	6.26545	9.19981	9.2686	10.7897	12.2406	12.9861	11.1469	14.0362	9.17369	13.6296	10.0215	9.79557	10.4122	10.2359	9.98052	12.5759	2.70288	12.1388	1.65939	13.3776	11.2287	8.56578	5.23053	10.2608	6.91563	4.08419	3.52626	3.24369	5.41298	3.42493	4.51845	1.9229	1.86474	2.85831	8.33366	3.39768	5.24184	1.54127	8.61588	2.3819	4.05363	1.64034
YLR342W	FKS1	5630	317.554	56.4039	309	324.824	514.979	328.477	417.633	305.5	408.273	279.466	291.994	233.261	273.276	213.441	268.638	250.243	330.023	218.062	328.286	237.776	327.793	163.821	342.224	122.839	371.405	489.993	376.386	310.831	338.991	267.008	160.337	145.386	118.661	167.647	125.329	156.563	121.252	103.573	81.4996	255.913	138.434	175.657	75.6762	274.164	128.653	198.259	99.0064
YPL145C	KES1	1304	73.4221	56.3053	310	87.0546	109.472	72.178	104.648	77.5109	88.3404	84.6918	84.9913	66.7315	65.483	62.0142	74.0373	75.8491	91.5846	66.1424	82.2149	75.9318	89.9448	20.7001	93.5464	14.1721	85.8984	105.871	90.492	55.1349	61.4691	54.7848	34.9791	31.216	26.1432	33.9967	23.8874	31.3324	28.4039	22.8564	20.121	52.0854	17.2207	41.3116	8.68247	54.8827	13.2706	42.0103	10.0998
YGL147C	RPL9A	575	32.3202	56.2091	311	39.2398	39.6715	34.2512	34.4993	33.0762	35.2591	39.0376	34.8881	29.1763	25.5516	32.0468	37.6076	37.0403	38.7044	34.1124	33.3281	33.0555	34.9937	5.33984	28.6207	3.85695	36.143	31.3418	25.5277	42.273	43.0572	38.2521	17.7201	19.1343	16.5573	12.812	13.1192	12.5	17.8555	15.2376	10.8691	37.7991	17.9177	17.0085	4.6238	35.1608	10.7959	20.1944	4.66326
YDR427W	RPN9	1181	66.3216	56.1571	312	87.3342	102.181	67.1657	91.2314	79.2374	74.0826	82.2106	82.6655	58.2778	61.8737	52.2901	72.5229	81.1546	91.1864	72.9847	83.3613	74.1752	85.4794	34.5441	92.21	27.0435	95.0515	81.4393	58.0099	51.3621	68.3736	49.8141	39.195	31.6785	27.4503	27.7659	20.3754	25.3297	26.3162	28.344	19.6321	47.3729	17.8305	28.3719	7.82621	44.3743	16.9517	33.8662	9.16249
YCL031C	RRP7	893	50.0661	56.065	313	68.5066	78.0563	55.3866	60.8529	60.155	55.5861	80.97	74.3311	59.6244	44.3428	56.6323	64.0254	70.6419	59.968	72.6872	57.1574	65.552	68.8939	17.1402	53.6778	14.1721	66.184	63.7941	59.282	46.4745	56.099	51.0028	34.1886	31.7363	27.1114	26.2861	24.6711	26.55	30.4917	20.2457	18.579	32.4418	7.95695	19.7577	4.24705	30.7781	9.74412	18.9415	5.20223
YMR205C	PFK2	2879	161.269	56.0156	314	133.378	220.338	114.616	183.23	121.764	189.301	120.917	153.314	109.748	139.789	98.9536	129.06	120.455	173.612	112.353	159.598	128.629	167.86	121.761	209.254	85.7499	213.572	283.557	227.29	155.887	146.433	122.86	74.3717	63.8773	57.1276	75.3923	54.1022	66.7874	50.8194	45.4463	41.1447	134.579	79.4243	87.4251	42.9842	139.049	94.3169	96.0341	79.1817
YOR276W	CAF20	485	27.0433	55.7595	315	32.7154	36.3477	22.3886	23.6703	28.4419	26.7815	44.579	42.2534	29.1763	25.437	27.7657	42.6556	41.0686	38.7841	37.8807	37.6682	36.3291	41.0083	7.7131	36.1936	6.36846	43.7706	30.2312	26.7999	28.5535	30.4948	26.2578	13.3065	12.024	12.1033	9.85241	8.88159	9.63058	13.4603	8.04501	7.82275	15.0304	4.47216	5.42512	1.57552	14.7914	4.45445	6.63321	1.99185
YNR051C	BRE5	1547	85.9873	55.5833	316	121.634	140.03	103.839	129.085	98.6833	90.0745	117.278	116.003	99.4988	71.0975	72.8391	99.0249	112.398	107.751	104.519	109.729	102.68	118.013	21.4912	94.2146	16.9526	116.995	124.01	103.468	67.1394	92.827	67.3193	48.3515	44.0493	32.1948	35.6322	28.1541	35.554	30.162	29.3563	25.8753	48.117	13.4165	31.5977	7.14121	50.8486	12.5281	35.6351	8.15485
YDL185W	VMA1	3215	178.688	55.5795	317	202.63	266.657	184.706	226.833	181.283	209.821	182.865	184.713	149.547	173.017	152.283	168.014	162.506	194.478	156.977	174.502	156.814	171.05	60.0567	230.08	46.2386	226.598	311.937	232.803	169.263	158.324	147.714	97.5594	88.0986	72.8135	98.5241	63.1289	82.2557	64.9939	55.8888	54.9473	122.624	57.4991	100.768	32.6577	133.969	45.72	109.522	41.899
YIL142W	CCT2	1583	87.7576	55.4375	318	103.179	136.813	90.2225	113.273	90.5051	100.286	128.94	125.113	77.8035	78.2588	88.7402	108.28	106.208	104.645	97.9741	106.044	94.2959	109.629	29.4021	107.912	30.1829	131.077	101.429	86.7604	93.8923	93.4024	75.3155	48.4833	44.9742	38.3917	41.1231	32.5078	37.9286	34.9967	27.4383	27.1164	61.8576	16.8722	34.2369	8.47697	52.7411	14.2914	36.5195	9.06875
YFR033C	QCR6	443	24.4771	55.253	319	17.2431	22.7307	14.7029	20.1246	21.1724	20.2306	26.3008	26.9414	24.538	16.557	19.2648	24.9876	26.8223	26.5197	26.4768	29.3157	23.6339	42.4663	15.6899	29.0662	13.2302	39.1941	35.2903	28.7505	25.1237	38.9336	22.6919	15.7439	11.9083	10.6509	11.1764	8.62036	10.686	6.75761	4.6352	10.0417	15.0304	6.30167	15.4689	7.46658	15.2895	8.56864	16.2514	12.5838
YGL030W	RPL30	547	30.2087	55.2262	320	36.2572	47.8202	20.8013	30.9535	29.6232	41.2319	39.9474	36.4387	29.5504	28.2442	32.1079	38.1965	32.2261	37.7488	29.3526	36.6036	29.7819	34.9026	6.79016	32.8526	4.61937	30.5103	31.095	23.9163	34.813	32.8922	32.9573	12.5161	14.9721	15.347	16.5115	16.341	18.7005	18.8444	13.213	11.17	33.5331	13.3003	9.82387	3.06541	26.8437	7.45502	12.6768	3.37442
YMR012W	CLU1	3833	211.172	55.0931	321	226.491	303.112	223.301	282.511	231.988	231.4	252.917	240.631	207.002	178.231	156.809	203.098	240.713	258.109	214.69	265.315	215.899	276.578	45.6194	214.043	31.7077	241.97	358.086	246.712	163.861	195.723	157.871	99.2721	83.9943	63.8571	96.9664	63.7385	87.6976	66.3125	49.602	52.6532	154.173	54.9436	112.498	25.0884	171.272	35.9759	119.398	25.6128
YPR108W	RPN7	1289	71.0035	55.0842	322	94.8839	109.365	70.3402	91.3273	79.4192	80.8262	102.391	106.699	79.4494	70.2954	64.7051	80.8521	89.8989	104.566	92.0242	93.2697	80.5627	98.5109	27.4244	90.0941	19.4193	103.5	89.83	72.0883	62.6806	58.2087	56.5137	40.3808	34.8579	32.4369	30.6476	20.9269	26.1543	33.0189	20.0859	20.1586	40.1306	12.9228	27.8221	6.2507	41.6351	13.6418	27.1593	7.52214
YBR067C	TIP1	632	34.7336	54.9583	323	53.5936	61.6516	46.7821	43.3158	40.5274	38.9199	59.1354	41.8657	32.5428	33.5722	42.6883	41.5619	63.4696	64.1888	56.3252	47.4128	76.4907	55.7712	8.30641	46.7732	8.47632	40.4849	43.9278	34.0935	16.9778	13.3295	21.7194	18.84	19.2499	14.766	15.2264	10.7101	14.9736	9.22991	12.0409	8.87582	24.0585	12.1677	17.8516	6.96995	20.4191	14.2604	20.6366	11.5293
YBR158W	AMN1	1649	90.6003	54.9425	324	38.401	128.235	36.7573	100.24	42.89	97.4924	46.1504	87.9956	60.971	82.441	44.0949	84.3016	57.5746	102.973	54.2427	96.8727	62.1187	104.343	72.1867	85.1941	53.8628	88.5973	154.488	113.56	90.2909	87.361	73.2624	12.9772	11.3881	9.8763	19.1596	15.5283	19.2282	12.1967	6.97945	5.79185	80.0131	69.2894	56.2306	44.046	83.6189	90.2027	64.3421	63.8093
YBL028C	YBL028C	320	17.5582	54.8692	325	17.4296	21.2296	12.1132	14.0872	14.4481	12.8127	33.6617	33.6283	18.4783	14.6091	18.2251	31.2135	23.8748	17.7594	24.2952	21.9458	19.0828	24.6961	7.7131	18.2638	4.17089	28.8675	16.2879	17.4708	19.0357	30.6866	21.5033	9.15648	10.81	9.10169	7.94423	7.74962	9.2348	6.75761	3.62292	6.31838	10.6155	3.0492	5.46178	0.907635	8.8649	2.32003	4.60639	0.890472
YDL208W	NHP2	470	25.764	54.817	326	28.6143	33.8816	22.5556	29.2286	26.261	24.1804	40.1128	34.6943	25.735	18.1611	23.7904	35.2519	30.2611	32.8112	31.0383	29.7251	27.3067	34.8115	5.73538	27.8412	4.93331	38.7247	36.8944	30.5315	29.068	35.0978	25.1772	15.2169	14.3363	13.0232	13.474	12.7129	14.116	11.5923	10.4425	9.74083	17.6098	4.61735	8.87081	1.86665	16.8831	3.74298	8.43891	1.82781
YER102W	RPS8B	602	32.9593	54.7497	327	31.8765	45.5686	24.1429	32.6785	31.4405	31.8873	54.4211	49.7156	32.094	26.6974	29.05	49.1338	40.3808	42.9253	38.1782	46.512	36.1694	45.6559	5.73538	34.189	4.88846	43.3012	31.9587	28.9201	31.9834	40.1803	25.7175	18.84	18.325	15.2018	13.7077	12.6838	13.7203	15.2733	9.80319	9.89127	28.771	12.2839	14.5159	3.87029	26.4453	7.33129	15.2932	4.14772
YKL156W	RPS27A	599	32.7262	54.6348	328	41.2903	57.0412	29.9071	34.7868	36.8018	43.0623	52.767	49.3279	37.2559	38.7284	38.5907	46.0209	34.3876	39.5008	36.6907	41.9263	34.4927	40.1881	8.10864	40.6481	7.08603	40.3675	38.8687	30.0226	32.8409	37.1116	28.0947	18.3788	15.0299	16.7994	18.6923	17.2988	21.1411	12.7461	10.5491	10.4178	18.7507	5.77895	10.9236	2.53453	18.2776	4.29978	10.392	2.46051
YPL274W	SAM3	1763	95.8447	54.3645	329	65.1511	133.918	50.5413	120.46	42.89	110.498	60.9549	95.4578	22.967	74.0766	69.7812	98.5201	40.6756	72.9491	39.1698	72.6341	47.108	67.1624	88.6018	135.085	92.9256	140.113	155.969	151.979	149.113	100.403	131.721	43.7403	36.7077	40.8124	56.2717	39.2996	47.7571	35.8758	34.3644	31.3662	68.2071	30.8114	38.5623	20.6187	60.5602	34.2436	45.4006	34.3769
YNL180C	RHO5	995	53.9708	54.242	330	39.799	76.1263	33.2487	67.4653	39.7096	55.5861	79.4813	104.18	64.8612	76.0818	43.361	92.7149	28.296	34.2447	28.0634	37.6682	31.2191	46.2938	69.2201	66.7075	51.9343	74.985	112.534	90.8312	54.449	59.8389	36.5232	9.02474	8.09305	7.26199	13.0457	12.6838	14.116	6.04339	4.84832	7.55949	17.1138	9.52511	14.8824	10.9944	19.2239	20.2306	18.6098	19.6607
YOR122C	PFY1	589	31.9014	54.162	331	43.9001	52.109	32.4968	38.1409	38.0739	32.5617	55.0827	47.002	40.0988	32.7702	36.3278	43.2445	45.4898	51.8448	40.5581	43.8916	48.3057	46.476	10.6138	46.2164	8.74541	49.2859	39.1155	27.9024	34.47	29.2482	24.9611	23.7805	24.915	18.4939	15.8106	13.6707	17.3482	19.8883	17.5285	14.2916	16.4689	6.06935	8.5409	2.12352	13.4468	4.02138	8.62317	2.62455
YPL004C	LSP1	1025	55.402	54.0507	332	28.6143	80.2007	30.7425	64.8778	39.7096	59.5359	37.0527	57.5654	27.6053	55.6291	21.283	47.1988	36.7456	110.22	33.6166	71.0782	43.6747	84.1125	66.6491	111.81	43.8616	90.5923	105.994	63.1832	25.4667	23.3026	19.6663	7.64138	7.45716	7.79453	8.91779	5.65984	6.46436	7.41689	4.74176	3.87377	19.3956	13.1841	29.5816	13.8029	25.7978	22.2723	31.5814	26.1283
YOR310C	NOP58	1535	82.9066	54.0108	333	88.6391	116.977	78.36	85.3857	76.8748	85.2577	99.2482	86.1543	69.2003	61.0144	73.0226	79.7584	83.3161	83.2225	75.3647	86.3093	70.183	81.7431	16.481	89.2032	14.1721	107.608	109.079	86.1667	100.581	112.294	94.5496	54.7413	45.7257	37.7139	51.8322	42.8696	50.8903	36.59	30.5284	32.8706	80.8564	26.4554	43.2543	8.92223	78.3896	17.4466	46.3956	8.90472
YDL130W	RPP1B	621	33.4935	53.9348	334	32.3426	53.2884	27.9022	41.7825	34.3483	43.9294	39.6166	38.28	26.0343	30.1348	31.3129	39.2061	34.5841	35.8374	24.8902	35.4572	31.4586	36.3607	9.16343	44.7686	7.84845	50.9288	40.1027	28.072	32.1549	39.9885	26.7981	15.678	17.6313	14.9597	12.6952	11.3777	14.4459	13.3504	12.2007	10.5306	27.4812	18.1209	13.2329	5.25743	29.1346	8.6305	17.5043	6.51451
YMR122W-A	YMR122W-A	245	13.1775	53.7857	335	3.82145	21.0152	2.3391	13.7039	3.45301	19.3636	3.55639	11.4355	2.84282	12.8904	3.42485	11.6104	4.91251	18.6355	4.16489	16.4594	5.11003	18.8638	12.2618	21.9389	12.1539	23.2348	17.6452	11.4493	16.6348	14.2885	9.7251	1.44923	1.32957	1.35557	1.90817	1.62539	2.17677	1.15374	1.27868	0.827407	5.95262	2.6136	4.32543	2.79141	7.07199	4.54725	5.49082	5.15536
YOR303W	CPA1	1235	66.3528	53.727	336	46.6031	85.5617	49.873	85.0024	47.3425	82.8492	76.8346	111.642	56.3328	91.0346	56.8769	116.777	34.1911	41.6511	29.0551	48.9686	28.5842	52.764	52.014	59.0233	53.8179	75.6891	90.3235	87.1844	79.2297	78.2509	71.8577	33.8592	27.8632	27.3051	49.3789	41.7957	47.3283	24.3384	28.2375	31.3286	35.7653	22.5641	33.2838	19.7282	38.1489	33.3156	32.687	30.2057
YOR270C	VPH1	2522	135.463	53.7125	337	165.348	195.999	160.73	172.209	149.57	162.905	144.737	131.121	114.611	123.404	113.57	127.462	134.013	151.871	116.914	135.687	124.557	140.339	34.5441	160.588	26.5053	161.47	207.177	171.655	148.684	115.458	104.599	69.8264	61.2181	48.3164	70.6414	42.9277	61.5433	44.5013	39.2128	38.0983	119.251	34.5576	74.7054	16.3546	116.289	27.8713	81.6253	17.6688
YGL215W	CLG1	1358	72.7597	53.5786	338	104.764	113.439	93.6477	108.577	86.5069	83.0419	93.2106	86.0574	77.2799	68.5194	61.6472	77.4026	96.3834	85.3727	84.9836	83.1156	83.517	90.5827	23.6008	75.9508	18.8363	81.0871	106.735	75.7351	63.7953	68.4695	61.052	43.8062	39.02	33.4536	50.625	35.7876	41.2268	33.0189	31.3809	26.7779	53.3255	16.1172	37.5726	10.2237	52.8906	16.5805	41.7155	10.8966
YGL105W	ARC1	1130	60.5422	53.5772	339	72.5144	101.966	61.5685	74.9401	72.3314	72.3486	82.7895	77.5291	59.9985	48.2386	58.9563	65.5398	76.7334	74.3826	67.1341	70.9963	70.4225	80.3762	19.5135	71.4962	16.863	78.8575	91.3107	68.3566	68.4256	61.4691	52.9478	31.0266	30.7536	26.3852	27.3765	21.7686	25.7915	22.9649	20.2457	18.6543	36.807	13.4455	23.8632	6.7302	35.1608	10.7959	26.6802	9.60772
YLR421C	RPN13	470	25.1717	53.5569	340	35.8844	36.991	28.3199	28.5577	32.3492	29.6716	38.2106	37.1171	28.5778	25.838	27.7046	28.9419	39.8896	37.032	38.3765	36.0304	36.8082	36.3607	10.2182	42.0959	6.99633	38.2553	29.4909	28.1568	24.0947	22.6314	20.963	16.6661	15.0878	13.0716	11.2543	10.1877	9.86145	12.6911	10.5491	10.0041	11.0123	3.4848	6.92803	1.64402	12.5005	3.92858	7.22282	2.57768
YDR233C	RTN1	887	47.237	53.2548	341	52.7547	74.3036	53.0475	62.1945	54.612	62.715	56.0752	56.4025	49.6746	41.6502	44.4618	49.891	53.6446	57.3399	39.9631	55.0283	45.7507	56.9559	7.11978	50.4482	5.91997	49.2859	65.3982	53.1757	39.1003	34.906	32.8492	22.0678	23.5276	18.9296	25.5462	23.3069	25.0989	15.8227	15.504	14.0283	39.8825	13.9101	28.9584	7.55221	40.1908	12.4353	30.5864	8.71725
YDR054C	CDC34	887	47.2025	53.2159	342	47.8148	78.4852	40.1825	61.5237	50.7047	51.8289	68.9775	77.9168	48.328	52.2489	42.5048	66.886	52.3673	56.3046	47.0038	52.6536	56.7692	64.2463	13.5803	53.9006	9.1042	63.7197	70.5807	57.0769	36.6995	44.6874	34.9023	20.6186	18.0359	15.1533	24.0274	21.2171	21.6688	14.4492	13.213	14.6301	25.001	5.40143	16.422	3.15104	25.2002	5.599	16.0671	3.16352
YPR074C	TKL1	2042	108.106	52.9412	343	120.982	186.134	113.697	129.085	108.406	151.152	109.173	106.215	87.0053	107.305	96.7519	97.9312	81.9406	112.291	67.6299	103.096	78.2473	106.986	45.092	144.886	46.2834	161.235	162.755	136.713	128.019	97.8136	89.1468	72.659	60.9869	57.3697	87.3087	72.7652	85.3229	56.8628	48.1635	41.0695	73.614	33.3088	49.5959	18.8035	72.9611	31.6452	54.5397	22.8945
YKL071W	YKL071W	770	40.6893	52.8432	344	18.4548	62.6166	13.9511	50.9823	12.6307	41.1356	36.7218	69.6793	17.431	53.5093	23.3623	49.9752	16.2113	44.6773	17.0562	41.8444	12.6154	38.9123	35.4011	57.2415	28.8374	60.5513	37.8816	28.7505	58.2218	52.9344	45.4919	12.3843	10.8678	10.2636	5.56875	6.03716	4.88125	10.3287	6.92617	6.0175	25.7947	11.0933	11.6567	5.66844	20.2697	12.2497	11.9398	6.84257
YDR023W	SES1	1388	73.3359	52.8357	345	99.2646	113.01	72.4287	88.069	84.5078	80.2482	92.3008	92.8412	70.8461	60.4988	76.3251	79.5901	88.8181	85.1338	79.5296	83.1975	74.8938	80.7407	16.5469	79.6258	14.6654	96.8117	101.799	86.5907	80.2586	77.196	73.0463	43.6086	37.2858	35.6322	35.0092	33.3495	35.455	31.5355	27.5448	23.8067	56.0538	20.1537	32.1475	8.47697	55.6795	15.8999	32.6133	10.2404
YER064C	VHR2	1517	80.0306	52.7558	346	59.2791	107.22	52.7969	99.4729	68.1515	100.286	72.3685	121.915	70.8461	92.4669	57.1215	118.712	59.4413	77.3292	55.1352	79.922	53.6553	99.4222	54.9146	70.6053	40.8568	79.0922	114.138	94.3932	57.7073	66.2639	56.9459	37.2188	36.8234	29.1932	29.7909	20.7527	26.2202	23.1846	19.926	21.0237	58.038	32.6409	42.4112	27.9312	64.8432	54.3814	50.0807	55.0218
YKR076W	ECM4	1112	58.5773	52.6774	347	33.6474	63.5816	32.4968	67.6569	44.1621	59.9212	99.1655	141.588	52.7418	89.3159	55.8372	93.0514	22.5975	35.9967	18.8412	35.4572	21.7975	35.6316	103.764	130.965	71.2191	140.465	77.3673	64.8794	64.3098	57.1538	46.2483	16.6002	21.0997	15.4922	13.7466	11.9582	11.3786	21.7013	13.6925	14.6677	15.3776	7.81175	11.0335	6.83295	16.6839	12.9922	14.2245	13.8492
YML026C	RPS18B	841	44.2183	52.5782	348	54.246	67.2271	42.6886	45.7115	41.8904	54.9117	55.0827	59.9882	42.8668	45.2022	46.847	52.0785	48.7321	54.6322	44.2272	48.5592	39.9221	53.2196	8.70196	48.7778	6.23391	52.4543	44.1746	43.677	49.7329	40.3721	44.1952	22.5948	17.3422	19.801	23.0539	20.3754	24.3073	19.229	12.8933	12.712	40.6762	17.6853	19.3545	5.80544	40.4897	9.92972	20.5998	5.29596
YCR093W	CDC39	6326	331.397	52.3866	349	451.584	603.543	429.225	494.681	426.083	417.714	381.94	369.039	327.747	295.161	254.662	308.685	371.189	415.077	343.504	389.047	353.151	409.171	82.8004	337.769	62.2046	367.884	517.633	396.57	268.043	292.29	256.743	158.69	144.461	112.27	132.287	114.619	120.25	114.605	86.5238	79.1678	227.092	66.6758	162.68	30.8596	228.993	56.6087	171.174	33.8614
YHR007C	ERG11	1592	83.3401	52.3493	350	43.5273	82.3451	32.9981	77.4317	33.9849	61.4626	55.4136	87.8018	41.595	68.7486	45.4404	87.8352	39.6931	61.1626	36.3932	56.3385	35.6105	55.6801	27.2266	94.7714	19.7332	94.23	123.763	108.981	79.4869	74.9904	76.8283	33.3322	32.2566	26.24	37.5793	22.7554	31.0025	26.8107	21.2047	17.526	126.989	49.5422	53.2615	15.3613	121.569	46.9264	59.8463	18.5359
YLR390W-A	CCW14	716	37.4712	52.3341	351	34.1135	64.2249	34.4182	48.2032	42.5265	52.8886	40.2782	41.1874	27.7549	35.4055	29.9674	36.0932	29.6715	38.147	27.8651	41.1893	34.9717	41.1905	20.7001	54.2346	18.2981	49.4033	57.7478	40.7087	35.9277	37.3993	29.8237	18.7082	17.2844	15.3954	21.3015	13.3514	20.5144	14.3393	13.6392	10.7939	26.0427	9.87359	15.9088	8.04884	25.001	8.19743	19.052	8.90472
YPL226W	NEW1	3590	187.11	52.1199	352	182.684	241.353	169.585	213.608	162.019	178.126	195.023	206.034	146.031	135.034	147.513	176.343	157.986	162.941	153.01	171.882	144.997	170.685	51.2888	179.743	37.1344	224.134	281.459	223.898	221.397	240.219	192.665	104.279	84.1099	71.458	121.578	80.1955	107.058	61.8074	55.1962	56.1508	196.536	69.0861	109.346	26.9208	187.258	50.8241	117.445	24.7223
YJR094W-A	RPL43B	553	28.7557	51.9995	353	34.4863	42.6736	25.5631	28.3661	29.4414	32.8507	48.0527	37.9893	31.3459	31.2806	33.4534	40.2157	31.6366	37.1913	31.6333	34.3927	29.1431	37.5453	6.46054	37.1958	5.78543	41.893	27.3932	21.6265	29.6682	34.1389	29.0673	19.4328	17.111	17.2351	16.1221	13.4095	17.3152	15.4381	10.5491	11.17	24.5049	10.2511	8.79749	2.5859	22.7599	4.82566	8.88113	1.99185
YDL074C	BRE1	2102	109.129	51.9165	354	160.594	173.053	134.331	155.055	140.937	129.861	173.105	151.957	127.478	98.2532	112.469	140.166	154.548	131.643	152.812	129.054	139.647	150.09	39.3566	104.126	29.5999	135.419	151.773	131.37	83.0882	108.554	94.9818	68.1796	57.7497	49.6236	45.8351	37.1808	45.7452	46.3144	35.6964	40.4301	68.0583	22.0994	48.093	13.135	61.8053	23.4477	48.4961	15.5364
YER026C	CHO1	830	43.0586	51.8778	355	45.0186	77.9491	38.5952	63.4403	48.5238	82.5602	49.9549	69.9701	50.1234	95.3314	40.3031	50.3117	14.6393	17.6798	11.6022	15.3948	11.9766	13.4872	27.0288	98.001	10.8981	54.4492	93.1616	70.7313	42.8732	41.7146	23.6644	15.0193	14.6253	13.4105	9.03462	6.00813	7.22293	12.0868	8.25812	5.15249	8.18485	2.09088	5.05856	1.31864	8.56608	2.53656	5.63822	1.40601
YPL239W	YAR1	602	31.2141	51.8506	356	38.401	52.109	33.917	36.2242	28.8054	31.6947	52.767	44.5793	26.3335	27.2703	41.037	41.3095	54.4306	42.3678	44.2272	42.4995	52.4576	54.0398	5.86723	38.5322	6.95148	52.689	32.0821	27.648	33.8698	34.2348	25.3933	12.3843	11.4459	11.9097	13.3572	10.3909	11.6095	10.2738	8.73763	7.97319	16.8161	3.57192	9.49396	1.57552	14.393	3.0315	9.5813	1.31227
YLR354C	TAL1	1007	52.1701	51.8074	357	36.63	66.2621	37.3421	50.4073	38.2557	52.5996	54.0903	71.5206	51.3952	59.0665	35.4716	62.1745	43.6231	63.8703	38.674	60.0234	39.7624	63.6084	31.0502	87.6441	20.7648	97.8678	90.9405	65.8123	42.1015	39.6049	35.4426	21.7384	20.3482	16.5573	29.7909	26.4706	31.926	16.7017	13.0532	14.1411	26.4891	12.0806	19.831	8.06597	28.039	9.68225	23.3636	11.3652
YDL137W	ARF2	545	28.207	51.756	358	30.4784	41.1726	23.9758	35.2659	34.2575	35.3554	34.2406	44.0947	26.4083	32.6556	24.9524	36.8504	32.7173	39.8194	27.9643	34.3108	30.1012	33.809	9.82266	47.5528	7.66906	43.1839	36.8944	28.6657	26.4099	21.5765	24.3128	13.9653	14.105	11.0382	10.3976	8.56231	9.30076	13.68	9.32369	7.221	12.6989	4.2108	8.32096	2.00365	11.7037	3.80485	9.39704	2.99948
YJR121W	ATP2	1535	79.3769	51.7113	359	98.4257	120.408	84.2077	101.39	87.4156	105.681	85.0226	79.7581	67.33	77.3995	69.0473	65.4557	74.1789	104.406	61.7792	91.9595	76.1713	84.5681	28.1495	101.008	21.3029	81.4391	113.768	80.7389	59.0793	48.715	43.763	45.1237	41.5058	38.6338	43.4986	31.4629	38.9181	39.9963	32.9792	27.5677	68.1079	33.3088	54.3245	27.7599	76.1485	37.0586	68.5431	49.9133
YDR487C	RIB3	626	32.3305	51.6461	360	20.2257	34.8466	19.9659	31.5285	26.1702	24.2768	37.7143	56.0148	21.9945	40.3898	25.0136	48.4608	24.6608	31.9351	21.6178	28.7425	22.8354	29.9816	30.9842	47.6641	27.5368	57.6176	40.2261	37.6555	42.5302	44.6874	38.6843	15.4145	13.9894	9.97313	10.9817	9.25891	10.4881	9.28485	7.99173	9.10147	15.824	6.79535	10.2637	4.3498	16.0365	8.13556	11.8661	6.28017
YDL082W	RPL13A	964	49.6876	51.5432	361	50.5178	73.6603	43.2734	57.4988	50.3412	50.1912	68.6467	65.706	43.3156	40.0461	47.7644	60.4918	62.8801	58.6141	49.3837	61.7431	50.3018	67.1624	9.29527	51.7846	8.43148	62.3115	54.1694	41.6416	60.194	59.743	46.5724	21.7384	24.5104	20.2852	20.9899	19.7659	20.4155	20.4377	18.5408	16.4353	41.7675	16.001	23.8265	5.83969	39.9418	12.0951	25.6852	7.77991
YML126C	ERG13	1475	76.0184	51.5379	362	97.0277	132.095	80.2814	108.96	89.6873	93.1572	117.609	134.998	82.5915	85.8785	76.1417	112.654	83.7091	77.0903	77.7446	82.2149	73.5365	80.7407	20.0409	88.4236	16.2351	89.6535	92.9148	62.2503	64.4813	70.8669	51.2189	63.8319	60.8135	49.2363	42.4082	27.8928	35.7189	47.1934	36.4956	36.3307	54.3672	22.5641	27.6388	8.39134	55.8787	20.1378	32.429	11.9511
YDR046C	BAP3	1814	93.4557	51.5192	363	49.7721	87.2773	41.4355	85.1941	36.4383	74.2753	55.9925	81.7932	37.4056	67.4309	55.6537	95.4072	61.5046	92.7792	59.4984	87.6195	65.7117	101.427	85.1078	98.3351	79.3815	117.582	123.393	124.331	124.589	101.266	113.676	21.8043	24.0479	21.4471	29.5183	24.2357	27.9023	20.3827	18.5941	18.3534	92.1664	52.4462	70.7832	42.0424	83.9675	61.2178	81.0357	70.816
YPL154C	PEP4	1217	62.6876	51.51	364	62.5414	101.001	62.6545	99.8563	72.5132	88.9184	71.6241	95.7485	60.8962	79.3473	46.3577	73.1118	51.8761	87.8416	41.0539	66.9838	59.8033	72.4479	68.495	117.601	49.647	98.8066	104.76	73.2756	41.4155	32.9881	34.4701	23.7805	23.412	17.574	19.549	14.2802	17.1833	19.3938	19.2334	14.1035	17.6594	10.8609	17.5217	8.92223	20.3693	12.2807	22.9951	14.0835
YPR041W	TIF5	1217	62.6281	51.4611	365	74.2853	94.6754	64.1583	73.2151	63.3354	66.1831	74.5189	70.3577	53.7144	52.2489	56.143	68.9893	64.4521	73.9844	57.5151	67.8846	61.5598	74.3616	17.4039	70.828	14.486	87.7759	84.5241	66.2364	79.5726	72.6889	55.5411	30.829	28.4413	25.659	33.8019	29.1119	35.2242	27.1953	21.0982	18.2782	47.0257	13.4745	28.9218	6.7987	46.466	11.6311	31.692	7.26438
YOR293W	RPS10A	754	38.5974	51.1902	366	41.8496	45.2469	31.912	44.0824	43.0717	41.0393	51.1128	56.9839	36.5078	34.8326	40.1196	51.153	44.9003	45.2348	46.2104	50.6064	36.7283	49.0276	7.51533	38.5322	6.09937	49.638	41.9536	34.2631	41.0725	44.112	35.4426	17.3907	15.3768	14.4272	16.7063	17.6181	17.777	15.548	11.1884	11.5085	36.6086	17.3078	16.422	4.89781	36.8541	9.52758	18.4993	5.22566
YDR060W	MAK21	3077	157.49	51.1829	367	200.114	241.674	177.605	196.167	179.193	169.263	248.12	211.945	176.031	119.623	152.711	185.514	203.476	143.35	206.757	168.77	168.87	190.461	34.1486	127.847	25.115	184.705	206.189	183.867	172.779	207.998	169.001	107.836	91.6827	79.1073	96.6938	78.1928	93.7992	74.3337	62.2289	60.8896	129.469	41.8756	75.4752	15.6182	119.825	32.7897	72.2651	14.2476
YGR162W	TIF4631	2858	145.411	50.8784	368	150.062	201.574	124.14	163.776	130.942	144.408	179.722	185.101	137.727	117.503	128.921	168.94	151.797	155.296	144.68	167.132	129.268	186.451	25.2489	127.847	18.612	167.69	220.626	186.497	158.974	159.666	131.397	63.7001	57.1716	50.4466	95.0193	73.8101	89.5775	44.0069	38.307	39.7531	110.471	32.4086	74.1922	14.5564	109.467	25.9843	74.4025	16.4503
YPL160W	CDC60	3272	166.394	50.8539	369	223.415	252.504	205.758	210.158	204.273	198.26	210.572	188.59	176.33	147.065	159.378	177.774	192.276	183.328	180.578	186.621	166.635	191.828	45.2238	152.347	31.8423	188.46	250.734	214.06	175.351	156.981	159.384	100.326	93.9372	79.1557	136.493	100.774	124.406	77.3554	67.1838	68.6748	126.394	48.8743	84.7492	23.941	127.894	41.2965	88.0005	28.003
YDR003W-A	YDR003W-A	122	6.20271	50.8418	370	4.4739	8.14874	2.50618	7.37901	4.99777	6.64721	7.77444	9.59423	4.93753	8.70816	7.15548	9.3388	6.09151	7.88424	5.85068	8.27062	6.148	5.83229	2.63696	8.46372	2.46666	8.68371	9.87142	5.51263	3.5156	4.5071	4.21421	2.04209	1.38738	2.08177	2.49231	1.59636	1.61609	1.70314	0.745895	1.54199	3.91881	1.10352	2.89584	0.804884	3.78501	0.58774	3.53771	1.00764
YMR142C	RPL13B	1001	50.8648	50.814	371	59.0927	76.3408	46.8656	57.0196	54.9755	62.6186	61.8647	56.7901	38.827	39.4159	44.0949	53.0881	50.6971	58.6141	44.4255	55.0283	41.3593	52.9462	9.42712	54.6801	9.55268	66.184	57.6244	51.0555	63.2808	59.4553	46.5724	25.5591	23.4698	20.8661	20.5226	20.6366	22.8891	22.855	18.8072	14.7805	46.728	26.5425	26.8324	8.23722	46.2668	15.4359	28.965	10.756
YDR064W	RPS13	994	50.1525	50.4553	372	76.5223	85.8834	55.8879	68.0402	58.1559	75.1423	54.3384	55.1426	43.8393	48.6969	56.4488	52.1626	49.2233	56.5435	41.0539	55.6015	42.7166	51.6704	8.89973	43.9891	7.84845	45.2961	43.9278	41.6416	57.6216	53.8934	49.8141	36.2307	37.4592	34.325	36.0606	31.1436	34.3337	35.9856	29.7292	22.3024	53.5736	19.5439	24.6696	6.55895	50.5996	9.89878	26.3486	7.05348
YOR151C	RPB2	3674	185.164	50.3984	373	253.707	312.332	227.394	255.007	217.539	225.812	233.151	221.54	182.165	172.674	165.616	188.206	209.175	230.076	192.477	209.55	199.451	232.745	64.3417	211.482	48.5258	224.368	274.302	222.88	164.719	162.735	147.605	96.9006	88.272	73.7334	94.2794	72.2717	82.0578	73.0152	52.1594	57.5424	121.929	43.7632	85.2257	24.1636	124.905	42.1936	91.9068	27.3469
YPL093W	NOG1	1943	97.8522	50.3614	374	113.525	129.415	89.3036	108.002	82.7813	99.3228	132.166	113.386	96.4315	70.2954	91.1254	104.241	93.2394	74.7808	82.4053	84.2621	78.1674	96.3238	18.0632	89.2032	16.2351	117.113	118.951	106.606	135.822	144.707	116.053	58.9572	54.9749	43.3299	69.1616	53.6959	64.8745	47.0286	35.4833	38.2488	102.236	30.3758	54.6911	9.96686	97.4142	22.5507	51.7022	8.64695
YKL009W	MRT4	710	35.6065	50.1499	375	49.3061	49.643	35.6713	36.7992	35.3479	33.1397	54.7519	46.2268	37.1063	30.9942	45.5627	45.432	43.0336	37.4302	36.0957	37.832	36.6485	39.0945	5.93315	41.4277	6.09937	50.4594	35.9073	35.7049	53.1628	56.5784	43.871	24.044	21.7356	21.8344	24.4168	24.2067	25.8574	26.1514	18.2744	16.0216	28.6222	7.46327	12.7564	2.29478	25.499	5.72274	12.4925	1.75751
YMR177W	MMT1	1532	76.3353	49.8272	376	74.9378	111.616	61.7356	102.348	62.5176	82.0786	122.572	167.56	49.9738	93.2116	88.1898	147.822	57.7711	67.0558	57.416	67.9665	57.3281	75.6375	52.4754	93.3237	45.1622	112.771	86.8685	76.668	68.8543	67.2229	73.5866	29.9068	29.3662	22.9963	36.4111	28.5314	28.6279	27.6897	23.1227	21.8511	39.3865	13.9973	24.633	7.24396	30.9275	11.5383	27.4173	9.37339
YGR037C	ACB1	263	13.1037	49.8241	377	16.1247	22.0874	11.1107	15.0455	15.0842	13.4871	16.9549	16.378	12.7179	15.182	12.0481	18.3411	16.8008	16.9631	13.6846	16.705	13.6533	18.4082	5.07614	17.2615	3.54301	21.1225	17.6452	15.1809	9.34636	11.6034	7.56397	10.0128	8.38208	8.95645	10.4755	8.85256	10.2902	6.48291	4.26226	5.75424	7.63919	3.71712	5.57175	2.22628	8.66568	3.92858	4.6801	1.94498
YCL037C	SRO9	1304	64.9332	49.7954	378	80.0641	111.831	73.8488	87.6857	76.6931	69.9402	115.128	84.6037	76.2325	53.9104	69.5978	85.7318	82.8249	60.2069	78.8354	72.6341	82.2395	87.9399	13.4485	43.0982	11.7951	63.7197	101.059	70.2225	53.3342	76.6206	49.1658	37.614	32.4878	25.9011	45.4457	32.827	43.4365	18.295	20.0859	22.0015	49.3075	14.6071	33.3938	8.06597	56.1277	13.5799	33.1292	10.0061
YLR009W	RLP24	599	29.7898	49.7326	379	33.0882	45.1397	31.1602	35.8409	32.2584	30.924	51.0301	43.6101	33.3658	22.4579	31.0682	38.1124	39.3983	30.6609	40.6573	31.1991	33.4547	35.2671	7.64718	28.5094	5.38179	41.6584	30.2312	29.9378	35.0703	50.7288	31.2284	17.9836	19.5389	17.4288	19.1207	15.9927	17.0184	14.5041	9.74991	14.1787	23.1656	6.65015	11.0335	2.48315	20.7678	4.73286	10.65	2.01528
YGR285C	ZUO1	1301	64.6977	49.7292	380	77.4544	104.325	67.4163	80.5942	71.241	80.1518	101.316	90.806	70.8461	57.6342	73.573	74.1214	82.6284	77.5682	76.2572	76.319	81.2015	82.8367	16.8106	69.7143	13.4545	85.781	88.596	71.325	65.3387	77.196	54.0284	37.4164	34.6845	32.7758	32.8673	25.8321	31.7941	26.2613	24.7211	22.6785	39.6841	13.1551	24.7796	7.0042	40.7387	11.1052	25.8327	8.81099
YKL122C	SRP21	503	25.0079	49.7176	381	37.6553	42.352	25.5631	31.6243	35.3479	24.8548	53.1805	45.7422	36.5826	20.2808	25.564	36.0932	46.4723	35.0411	47.5987	34.0651	39.2035	40.6437	6.72424	35.414	5.65088	44.3573	27.2698	23.9163	20.0647	28.9605	20.7469	20.7503	19.1921	15.347	9.6577	9.20086	9.92741	14.7239	10.1229	11.0196	8.97853	2.43936	5.46178	0.976136	9.0143	2.13443	5.34342	1.05451
YOR341W	RPA190	4994	247.656	49.5907	382	286.143	372.269	262.564	293.244	238.803	271.668	290.88	260.207	210.219	173.418	208.304	235.153	245.527	205.07	219.45	218.721	194.979	235.934	39.3566	233.755	31.932	290.318	362.158	292.763	309.716	346.087	295.103	161.984	137.177	114.981	174.033	140.654	171.404	109.55	94.6754	91.5037	235.724	75.7072	133.245	26.407	221.822	63.7544	127.063	26.761
YOL058W	ARG1	1262	62.5257	49.5449	383	104.484	116.763	100.749	101.965	114.585	109.534	139.278	113.483	132.565	118.305	124.762	128.808	54.3323	38.4655	46.6071	31.9361	34.0934	36.8163	59.793	74.3917	57.9888	84.2555	73.6655	87.5236	63.3666	56.099	61.2682	69.6947	66.9411	61.4364	54.8697	44.437	44.9207	62.5766	61.4831	60.4759	6.69669	6.67919	18.548	12.9295	11.4546	13.2706	17.9097	22.7539
YFR032C-A	RPL29	179	8.86353	49.5169	384	12.4896	14.3675	8.18686	12.7456	9.63207	10.597	13.0677	12.1139	9.20177	9.10919	8.8679	10.7691	7.76176	11.3883	7.33814	12.7744	8.06426	11.1178	1.58217	10.3569	1.74908	10.2092	9.37785	7.03921	5.9165	7.47986	7.78008	4.94055	4.97144	3.48575	3.81635	5.45666	4.38653	3.62603	2.07785	3.68572	6.54788	4.58831	4.03218	1.26726	6.62377	1.91789	6.11729	1.42944
YCR031C	RPS14A	720	35.5646	49.3953	385	39.4262	56.2906	30.3248	43.8908	38.2557	46.5304	52.0226	43.1256	34.1887	29.7911	31.741	42.7397	39.7913	42.1289	35.5999	42.0901	38.0857	43.5599	7.05386	38.7549	8.87996	41.6584	44.0512	28.7505	35.6705	38.4542	28.7431	20.8162	19.7123	17.8645	15.1875	14.019	15.7651	13.0208	12.0942	10.9443	30.8544	18.3823	17.3384	6.16507	30.1805	9.86785	18.0939	7.14721
YIL069C	RPS24B	816	40.3027	49.3906	386	40.2651	57.1484	29.4059	45.5199	44.7982	37.9565	55.579	56.1117	37.5552	31.4525	33.7592	50.8165	47.5531	51.0484	42.938	50.6064	39.2035	53.3107	7.31756	42.7641	5.56119	48.1125	37.1412	29.9378	47.5892	50.3452	37.0635	18.9717	19.0765	17.4288	15.6548	13.9319	16.5237	16.0974	11.8278	12.1478	39.9321	11.5869	18.548	4.43543	34.8121	8.97077	21.7422	4.52266
YNL016W	PUB1	1361	67.1608	49.3466	387	81.6486	110.651	76.4385	93.1481	68.9693	73.5046	91.1429	98.2682	70.3972	59.754	65.806	85.227	74.0806	81.5501	73.6789	78.9394	77.9279	93.9545	14.2396	72.7212	12.0193	84.6075	104.02	80.23	67.3967	63.2911	47.653	33.6616	27.4586	24.1098	30.7644	27.7187	31.0355	21.3716	21.631	19.1808	36.1621	12.7485	26.0992	7.10696	35.7086	10.0844	26.0538	7.05348
YDR172W	SUP35	2057	101.314	49.2531	388	116.787	150.859	99.8296	118.927	105.044	112.424	156.481	137.808	121.194	85.993	101.216	116.188	127.627	116.432	119.889	126.598	124.557	136.147	26.2377	97.6669	22.7829	134.128	154.858	118.903	101.095	105.773	82.5553	53.2921	44.5696	39.4568	57.7125	45.2206	57.8824	34.9967	26.7989	29.9371	69.0008	20.1828	46.9566	10.2066	66.9349	19.5501	45.7691	11.623
YKL196C	YKT6	602	29.4787	48.968	389	40.9175	45.783	32.4133	38.045	35.8022	37.5712	39.3685	43.5132	34.0391	28.3015	31.3129	33.9899	40.7738	39.5008	34.2116	35.2934	33.8539	39.8236	10.2182	44.9914	6.32361	42.4798	35.9073	28.9201	33.6983	29.1523	24.853	21.409	19.4811	17.9613	14.4087	11.2326	13.4564	17.5808	14.9179	9.70322	15.328	4.55927	8.35762	1.55839	13.6958	4.20698	9.24964	1.99185
YNL154C	YCK2	1640	80.2498	48.9328	390	92.1809	123.089	83.9571	109.152	86.0526	82.7529	109.669	111.739	83.4892	69.4934	62.6258	95.1548	92.1587	105.362	91.6276	102.195	95.0944	119.835	24.3919	94.2146	21.4823	106.082	118.704	100.075	68.7686	72.4012	58.5667	35.9672	34.1064	29.048	35.9438	26.0933	31.3653	27.0854	24.2949	21.7758	44.2974	13.3584	34.7868	7.50083	45.2707	12.2807	35.3402	8.01425
YMR242C	RPL20A	995	48.6127	48.857	391	53.0343	65.726	44.7771	57.2113	53.3399	52.118	58.5564	61.7326	39.201	37.1242	38.5907	56.1169	53.9393	58.2159	44.9213	60.7604	44.7127	53.2196	11.6026	44.7686	9.1042	62.0768	53.7993	43.5074	55.3922	56.2908	42.3582	25.6909	24.1635	21.4955	20.2111	18.3146	18.5356	20.108	16.9957	15.8336	48.8611	19.3116	27.6754	8.80235	43.8264	13.7036	28.6333	10.053
YJR088C	EMC2	878	42.8429	48.796	392	59.8384	67.2271	44.61	60.3737	51.6134	48.2645	66.7444	66.4812	49.1509	39.0721	40.7312	51.9102	63.0766	54.7915	58.606	51.0158	50.9406	52.2172	18.7224	54.9028	11.3018	68.4136	54.4162	40.7087	34.0413	45.2628	44.5194	34.9132	26.8227	26.0947	16.2779	12.5677	15.6992	26.2063	15.8769	16.5481	23.2648	7.49231	14.186	3.45929	21.963	5.44433	14.5931	3.42129
YKL001C	MET14	608	29.6242	48.724	393	10.9051	15.4397	9.60703	10.8289	8.63252	9.24829	15.9624	16.0873	8.52847	7.79151	11.6812	19.3507	62.2906	102.575	49.3837	99.575	66.5102	93.1343	14.2396	20.9366	49.3331	49.5206	14.5604	12.6366	42.616	32.5086	42.6824	22.3313	16.4173	16.8962	44.0048	40.1413	32.9155	17.6357	19.4998	20.7228	16.6673	4.90775	10.0805	2.94553	11.7037	3.95951	8.40206	3.28069
YGR253C	PUP2	782	38.0988	48.7196	394	49.5857	60.1505	34.3347	39.0034	41.1635	36.7041	52.9324	53.9797	38.3033	37.5826	32.6584	42.8239	54.8236	57.4195	49.4829	51.0977	39.9221	57.8672	14.0418	60.0256	10.7187	59.6125	41.5834	38.8429	42.273	40.0844	35.5507	19.6304	18.7296	17.3804	15.7716	13.2353	13.7533	17.8005	9.90975	11.6213	18.3043	4.58831	10.0071	2.14065	19.1741	5.38246	13.0085	3.09322
YOR254C	SEC63	1991	96.9851	48.7118	395	138.691	142.174	124.39	132.056	109.042	107.126	140.353	121.43	105.409	95.7324	94.5502	100.287	109.745	107.831	107.494	101.377	107.151	104.799	22.2823	109.026	17.2217	120.751	153.007	118.649	94.2353	91.005	79.0975	58.4302	51.4487	46.4283	50.4693	34.9168	43.3706	43.1278	36.389	34.1869	77.6817	24.0451	47.1032	11.4225	70.7199	19.3645	50.007	10.1233
YBR106W	PHO88	566	27.4859	48.5617	396	29.5464	43.1025	23.391	31.241	29.6232	30.8276	37.6316	35.8572	20.4234	25.838	24.5243	30.0356	26.9205	35.28	23.601	30.8715	29.3826	38.6389	10.0204	33.9663	11.6157	44.592	41.3366	27.9024	31.4689	26.9467	16.1004	15.151	15.0299	13.1684	21.4572	20.2883	24.2084	10.7133	10.7622	10.0793	21.1318	7.37615	8.68752	3.03116	18.8255	6.49608	10.5763	3.06978
YDL097C	RPN6	1304	63.2477	48.5028	397	78.3864	113.225	63.7406	76.8567	68.0606	75.913	81.3835	91.5813	60.971	57.3478	51.9843	72.1864	79.3861	81.789	64.3575	84.4258	64.1947	87.302	22.7438	83.1895	15.966	84.1381	93.7785	65.8123	58.6505	53.4139	50.2464	30.7632	25.6665	22.2701	22.976	17.502	22.5263	22.0309	16.1433	14.8181	31.9953	9.06047	23.5333	5.39444	33.9157	9.99159	25.3167	7.26438
YLR040C	AFB1	674	32.6819	48.4895	398	13.8877	28.5206	12.5309	20.0287	14.7207	18.9783	21.6692	21.902	12.0446	16.3278	13.3936	20.2761	40.7738	57.4992	32.2283	53.4724	43.1957	56.2269	2.83473	42.2072	3.00483	49.1686	45.2852	29.5138	29.754	31.5497	23.0161	2.89846	3.00599	2.9048	15.8885	11.0004	12.3351	0.988919	2.34424	1.46677	39.6841	12.9228	25.1095	8.68247	37.6509	15.1884	25.1693	10.9669
YBR283C	SSH1	1472	71.2665	48.4147	399	85.0973	104.325	79.2789	91.0398	73.331	77.6471	81.6316	74.9125	62.9161	60.7279	60.2406	64.4461	68.8734	84.656	65.4483	81.396	69.3846	72.8124	21.9527	96.9987	17.3114	94.5821	97.7271	73.53	73.8276	64.5378	59.9715	33.464	36.7077	28.8059	32.0495	19.2144	26.9788	27.5249	23.176	19.8578	64.9827	19.602	39.2955	9.05923	62.1539	16.5495	44.5899	9.70146
YGR218W	CRM1	3254	156.8	48.1868	400	212.883	251.11	201.497	238.428	200.729	175.717	207.429	189.559	161.293	138.929	131.49	162.125	205.539	207.698	195.155	196.038	183.402	193.012	66.0558	190.434	47.8083	204.302	223.464	170.128	116.872	126.966	121.78	96.0443	84.4567	68.3111	71.7707	46.817	58.9048	67.0267	58.979	50.7727	106.403	44.4892	79.5073	23.4444	102.644	29.5108	84.6839	20.6683
YNL260C	LTO1	596	28.7167	48.1825	401	27.9619	33.6671	19.8824	25.4911	22.9898	25.2401	38.7068	48.0681	20.0494	32.0827	29.417	46.1892	21.9098	24.8473	20.7253	23.3379	20.0409	25.8808	16.8106	39.98	14.486	53.7451	37.1412	33.5847	38.5001	41.5228	38.6843	14.0312	12.6598	12.8779	14.4087	14.7156	13.9511	15.0535	8.95074	12.1102	16.2705	4.76255	9.31068	3.27091	11.9029	5.01126	8.51261	3.70249
YMR072W	ABF2	551	26.464	48.029	402	29.5464	37.7415	23.8923	31.5285	27.7149	24.7584	37.9624	41.7688	27.6801	25.0359	24.3409	34.6629	37.2368	41.2529	31.1375	37.9957	32.0973	39.3679	7.58125	38.9777	5.78543	42.0104	34.1798	24.086	21.0936	22.3437	19.6663	12.5161	11.2147	9.39217	10.3976	10.0426	8.60815	9.39473	7.8319	6.46882	15.3776	4.32696	8.50424	1.93515	14.3432	3.34084	9.69185	2.20275
YKL013C	ARC19	515	24.6865	47.9349	403	31.3173	38.3848	24.0593	30.5702	32.7127	29.5753	39.6166	36.8263	28.6527	25.9526	24.2186	26.8385	29.3768	33.289	28.3609	32.4274	33.5345	31.0751	10.5478	35.7481	7.66906	37.4338	31.2184	21.4569	24.7807	21.5765	24.9611	14.2947	15.2612	13.0232	9.15145	5.63081	7.22293	10.988	8.7909	8.65016	13.9887	3.57192	8.24765	2.2434	13.3969	3.52644	8.36521	2.36678
YGL206C	CHC1	4961	237.521	47.8777	404	298.073	422.019	291.552	368.184	296.686	297.39	269.542	269.511	238.647	226.24	181.333	217.232	262.819	319.75	226.193	278.581	252.866	302.276	97.4356	306.253	71.6675	282.573	424.965	297.852	165.233	178.654	137.556	117.519	107.984	81.4795	89.6452	64.377	73.3837	74.6084	64.9461	57.7304	125.551	54.9436	112.681	34.8326	144.926	49.0918	118.698	40.329
YOR232W	MGE1	686	32.8365	47.8666	405	46.5099	48.4635	32.3297	36.1284	40.4365	35.1628	55.9098	48.9403	42.9416	32.8847	39.9973	44.4224	45.1951	41.8103	46.1113	40.2067	41.1996	48.2986	14.9647	43.5436	9.64238	52.2196	38.4986	32.3973	30.0112	35.3855	30.9042	19.9598	19.0187	17.0415	13.513	13.0031	13.6543	15.3832	12.6802	10.3802	20.5365	6.96959	11.2168	2.97978	16.2855	5.72274	10.6868	3.11665
YBL027W	RPL19B	953	45.5611	47.8081	406	53.0343	68.8354	35.5878	47.6282	46.8882	57.5128	61.1203	61.8295	38.6773	41.6502	53.4521	56.201	47.1601	50.8095	47.4004	55.4377	47.4274	59.5075	9.3612	51.2278	7.62421	58.7911	50.9612	48.6808	51.6193	48.2355	44.5194	21.2773	23.5855	21.3018	22.976	22.9296	23.9445	19.174	12.5204	14.1411	33.6323	15.5654	17.6316	5.68556	35.0114	9.18731	20.7103	7.26438
YPL243W	SRP68	1799	85.8859	47.7409	407	122.566	124.697	95.9868	110.206	106.861	87.5697	143.662	122.302	101.593	76.1964	89.6576	103.568	114.265	111.096	115.229	101.786	112.74	108.991	28.0177	106.465	21.6617	107.608	102.293	90.3224	73.3989	78.6344	76.6122	56.7175	46.9397	41.587	40.9673	33.2914	38.2255	43.6223	28.3973	31.2534	62.7009	20.7345	42.4112	10.1039	61.4566	19.2098	43.4843	11.0606
YER055C	HIS1	893	42.6268	47.7344	408	44.1797	54.3606	39.5977	41.6866	56.8838	47.3975	61.0376	46.4206	59.5496	42.6814	44.1561	39.8792	59.6378	52.4023	49.3837	46.1845	45.8305	47.9341	20.1727	61.362	18.2532	60.1993	66.6321	50.377	56.7641	51.6878	55.5411	30.9608	29.135	26.8209	38.2414	31.3468	31.6951	30.9861	24.3481	24.3333	21.5286	8.68295	17.7783	6.7302	24.4532	11.8167	18.8309	11.1309
YKR094C	RPL40B	754	35.9545	47.6851	409	40.3583	45.9975	37.7598	39.6742	40.5274	37.6675	57.9775	57.1777	33.0665	35.1191	34.7377	48.2084	48.8303	43.3235	36.5915	44.5467	39.0438	45.3825	8.30641	36.3049	7.7139	46.1176	35.2903	33.415	38.1571	33.5635	29.3914	19.2352	16.7064	13.2652	13.8245	14.9478	15.5013	13.8449	11.6146	9.85366	34.426	15.3041	16.7885	5.05193	32.0232	8.47583	19.4574	5.5303
YER072W	VTC1	389	18.4906	47.5336	410	14.8198	19.6213	12.0297	12.0747	13.9938	16.7625	14.9699	16.5719	10.7728	11.5727	11.8035	12.1152	11.9865	15.6888	13.7838	15.8861	12.6154	14.8541	12.4596	40.4254	8.47632	29.1022	37.7582	31.9733	34.813	25.2206	25.7175	6.25803	6.06979	5.51911	7.16539	7.05303	6.49734	5.93351	4.10242	3.38485	12.2029	6.04031	3.8489	0.993261	12.5503	4.02138	4.7538	1.21854
YMR039C	SUB1	878	41.7121	47.5081	411	54.4324	70.2292	40.0989	55.8697	49.6143	44.122	80.6392	80.6303	57.4549	50.9885	46.4801	70.8402	61.9959	63.4721	61.4817	60.7604	57.5676	78.827	4.4169	45.4368	4.26059	58.9084	49.9741	47.5783	29.754	32.9881	21.9355	22.3972	20.5795	15.0565	24.5337	17.7342	21.6028	18.2401	12.6802	12.1478	12.054	1.48104	8.72418	0.616507	9.66174	1.14455	7.95985	0.726438
YNR016C	ACC1	6701	317.343	47.3576	412	339.55	609.761	348.861	479.54	347.936	524.166	332.73	407.028	326.625	438.387	256.619	335.776	143.347	207.857	121.079	181.217	138.37	187.453	144.637	379.531	77.1839	321.415	713.704	561.44	281.677	249.904	241.939	103.883	94.8621	75.7667	90.3462	73.8391	90.2702	74.3337	54.2372	44.68	156.107	101.146	117.886	51.9578	176.202	109.536	131.743	73.0656
YDL070W	BDF2	1916	90.3252	47.1426	413	35.1387	105.612	34.5853	95.1605	43.0717	69.9402	49.2933	97.6867	45.2607	73.2173	27.9492	78.7488	46.4723	104.805	51.7636	105.225	44.7127	98.6021	229.217	138.761	160.064	146.802	145.727	110.422	71.5125	107.499	74.343	30.9608	24.1057	20.7693	15.538	13.1482	13.9841	20.3827	12.1474	15.2694	59.3774	71.8158	50.3656	44.2001	71.716	100.968	55.0556	79.4863
YOR206W	NOC2	2132	100.168	46.9829	414	127.32	159.008	106.93	109.919	116.039	100.382	143.993	133.156	101.219	75.5662	102.623	113.664	118.097	85.532	115.625	97.1184	91.1022	104.981	21.1616	91.3191	14.3963	130.021	153.747	119.073	113.7	149.405	112.919	73.2519	65.7849	57.3697	65.4231	51.0256	64.2808	44.5563	38.2538	43.2508	77.8305	21.9542	46.0769	9.12773	73.6583	19.3954	43.9266	7.33468
YBR127C	VMA2	1553	72.8219	46.8911	415	85.1905	107.649	68.0011	90.8481	77.1475	89.4965	92.7144	87.7048	71.5194	70.9256	68.8027	76.393	81.3511	91.1067	74.968	78.2843	86.6309	81.5609	23.403	92.8782	20.2266	101.74	117.223	87.0148	71.5125	63.6747	57.7023	38.8657	38.8466	34.5187	35.2428	26.0643	32.9155	26.3162	22.217	24.6342	43.4541	19.1954	34.5668	11.7479	47.7111	14.1058	38.5831	13.8726
YFR004W	RPN11	920	43.0642	46.8089	416	57.5082	61.6516	48.4529	52.4197	52.5221	54.2374	68.8121	66.9658	51.47	42.1085	46.9693	50.6482	60.1291	64.9852	59.4984	57.3211	53.9746	65.6132	12.9211	59.3574	12.2884	62.4289	55.5268	49.5289	44.2451	32.7004	31.6606	22.463	20.4638	19.6558	19.3543	15.5863	16.1609	22.2507	15.131	13.3513	20.5861	5.43047	14.2226	2.87703	19.7717	5.2278	13.7455	3.70249
YGL037C	PNC1	650	30.2898	46.5997	417	11.4644	42.8881	11.1107	40.5367	13.2668	24.0841	21.5038	39.2491	8.60328	24.2912	12.4762	29.026	20.9273	70.0821	19.6345	48.6411	26.7478	52.3994	36.7196	74.2803	35.6992	63.2503	44.298	32.3125	10.0323	11.8911	10.6976	1.31748	0.69369	1.01668	2.10289	0.986843	1.08839	1.0988	0.692617	0.865016	7.19275	2.29416	8.94412	3.56204	8.41667	5.72274	11.4607	8.99845
YLR347C	KAP95	2585	120.392	46.5735	418	119.304	182.382	102.586	161.188	95.412	131.499	125.963	134.513	91.7184	112.69	97.0577	123.928	101.001	130.05	91.6276	132.002	102.759	142.8	28.1495	121.499	20.092	126.853	207.547	158.764	115.929	103.759	98.7638	42.6863	39.5981	28.7575	56.2717	39.6479	51.0882	34.8319	25.8399	26.0633	91.8687	26.0489	65.2481	11.0457	90.392	21.932	67.5481	13.8023
YJL127C-B	YJL127C-B	158	7.32002	46.3292	419	7.64291	9.43538	7.93624	9.29564	10.359	9.82631	11.9925	11.2417	12.1194	8.13525	7.40011	9.17053	8.44951	10.592	9.9164	7.94307	10.0604	9.84198	2.57103	9.24328	2.46666	11.7347	10.7352	6.1063	7.45994	7.19217	4.97061	6.19215	5.02925	3.96989	3.85529	3.42493	3.26516	3.79085	3.24997	3.38485	4.06762	1.07448	2.05275	0.787759	4.03403	0.989878	2.61643	0.445236
YFL045C	SEC53	764	35.2817	46.1802	420	40.2651	50.1791	33.4158	41.6866	35.1662	40.3649	35.7294	38.3769	29.6252	35.3482	31.741	33.4009	36.4508	48.0222	31.5342	40.1248	39.3632	32.5332	16.0195	52.3414	12.3781	45.7655	45.7787	35.6201	34.5558	34.8101	30.0398	16.8637	15.4924	14.1367	16.5505	12.1614	15.4683	13.1306	9.48352	9.06386	35.4181	14.8104	16.7885	6.64458	28.6864	9.62038	18.7572	5.9521
YPR110C	RPC40	1007	46.4996	46.1764	421	60.3044	60.9011	50.7084	56.9238	53.3399	49.4205	65.9173	56.1117	44.2134	37.4107	50.6388	49.6386	50.4023	46.5887	47.5987	47.3309	45.6709	52.4906	10.5478	54.2346	9.64238	61.6074	53.7993	48.0871	63.8811	70.0038	46.5724	35.045	32.3722	28.1281	26.2861	23.7133	25.8904	25.8218	20.0859	20.6476	37.055	12.1097	20.1609	4.33267	36.8541	10.3319	20.9683	4.21803
YDL160C	DHH1	1520	69.8504	45.9542	422	88.0799	121.052	87.8834	103.21	90.6869	85.932	90.564	81.1149	68.7514	68.5194	57.9778	67.3908	80.1721	91.6642	71.8939	84.0983	82.2395	84.6593	30.0613	80.4054	20.6302	81.4391	111.177	82.6895	49.3899	53.7975	45.1677	30.9608	31.7363	22.8511	31.7769	18.8951	27.1437	19.6685	22.3236	18.1277	43.5037	20.4732	37.316	11.1656	47.8605	18.5602	39.6887	14.4116
YIL133C	RPL16A	889	40.8188	45.9154	423	44.739	59.9361	40.6001	43.6991	44.6165	49.9022	49.1279	50.4909	36.6574	39.3586	38.5295	49.891	38.9071	46.6683	38.5748	44.2192	33.7741	45.8381	5.86723	36.9731	4.97816	43.888	43.0641	34.4328	45.9601	46.7012	37.9279	19.4328	18.9609	19.3169	17.7966	19.8239	18.7664	17.0314	12.1474	11.5085	39.6345	14.8394	23.9732	5.06906	40.0414	10.3009	24.9482	6.163
YML073C	RPL6A	945	43.3564	45.8798	424	42.3156	61.2227	33.2487	45.2324	37.4379	42.099	49.2106	48.8434	29.9244	30.7077	36.5113	48.1242	44.9986	51.2077	43.1364	51.0977	39.2035	48.8454	8.50419	44.6573	7.8933	56.9135	43.1875	37.9099	49.7329	56.0031	52.9478	19.9598	21.62	17.9129	15.1875	13.4385	15.2044	20.5475	14.9712	12.8624	38.2456	18.15	24.4864	7.0042	39.7426	11.9713	28.1543	10.053
YER122C	GLO3	1481	67.7587	45.752	425	83.1399	111.509	73.6817	84.2357	78.5105	71.6742	106.361	92.1628	72.6416	57.2332	62.4423	78.8329	91.0779	86.0895	96.8833	82.2149	93.258	100.789	21.689	83.3009	17.7599	85.1943	98.0973	83.1983	60.4512	65.0173	55.6492	36.1648	33.8752	28.467	33.0231	24.0616	31.926	27.5798	22.7498	21.2493	38.2952	10.5125	29.6915	6.43907	38.4477	12.4972	30.955	8.67038
YDR496C	PUF6	1970	90.0632	45.7174	426	118.651	122.338	89.3036	97.748	97.7746	83.8126	137.128	109.413	103.838	63.3633	89.7187	101.381	120.356	85.8506	110.072	93.761	93.0184	103.432	15.0966	74.2803	13.4993	114.296	98.2207	90.916	106.24	142.501	107.841	76.4797	58.559	47.2998	60.1659	45.0175	60.1581	46.644	43.2086	41.5208	90.579	23.2029	49.8158	8.13447	82.2244	18.6221	44.2214	7.07691
YNL087W	TCB2	3536	161.639	45.7123	427	94.9771	174.233	88.8859	179.971	77.6927	140.169	118.271	190.722	70.2476	149.929	97.4246	215.129	72.2139	103.212	73.4806	101.95	75.5326	111.816	121.959	132.747	126.831	207.47	261.963	286.827	257.668	218.642	225.73	67.8502	56.5935	50.1561	71.9654	56.5403	70.3494	42.5784	44.6471	45.6202	130.313	79.7438	67.6674	34.1134	115.692	69.2296	68.3589	35.9001
YLR060W	FRS1	1787	81.6454	45.6886	428	107.094	122.767	93.1464	100.815	83.1448	92.5792	104.955	93.2288	79.0005	68.3476	80.0558	88.0876	94.6149	90.39	88.4543	92.9421	82.5588	100.334	22.9415	89.9827	18.2532	97.1637	124.997	103.044	84.0315	75.1822	70.9933	43.4768	34.9157	32.6305	40.5	34.1332	40.0394	32.3596	26.1063	23.3178	60.8655	20.0957	40.3585	10.7375	61.9547	19.117	43.2264	14.5288
YKL039W	PTM1	1571	71.7157	45.6497	429	71.6756	94.461	64.9101	88.3565	71.5136	76.202	85.5189	99.528	63.1406	74.936	61.0968	83.8809	65.8276	83.3818	60.0934	74.1899	73.4566	76.731	40.9388	92.8782	31.5283	97.5158	99.2078	75.9047	73.5704	65.6885	57.8103	36.2307	33.4127	27.6924	32.7894	19.0983	27.7044	25.1075	21.6842	20.6852	51.5397	20.9669	37.0594	12.9295	49.9522	18.684	44.811	17.3642
YHR052W	CIC1	1130	51.4612	45.5409	430	60.7704	60.9011	53.0475	55.103	56.0659	47.3975	74.0226	65.8029	47.9539	36.2076	56.4488	58.725	61.4064	45.3941	53.3503	49.46	49.184	53.5841	10.7456	49.5573	7.35512	63.485	65.2748	56.5681	58.6505	82.2785	66.2388	39.3926	30.0021	27.3051	35.7491	26.7609	31.6292	24.7779	20.0859	23.2802	55.5578	14.3457	25.4028	4.77793	46.217	11.1671	24.5429	3.79622
YCR053W	THR4	1544	70.1746	45.4498	431	96.5616	112.581	86.7139	90.9439	85.1439	86.9917	97.5114	75.7847	78.8509	58.2072	70.3317	70.7561	89.3094	81.5501	73.2822	79.922	77.5287	78.6447	15.2944	64.8143	14.6654	92.9392	99.8248	89.0502	80.9446	71.2505	64.5099	41.3689	34.6267	29.871	45.0173	40.1993	42.579	33.5134	34.0448	26.8907	47.0753	15.0717	34.3102	9.52161	50.002	11.3217	38.8043	11.459
YMR002W	MIX17	470	21.3304	45.3838	432	24.2336	36.7765	22.0544	28.6536	26.988	23.5061	29.9399	28.9765	20.8723	19.5361	14.5556	22.2112	26.724	31.2184	28.8567	31.1172	26.5881	34.0824	24.0622	36.3049	23.366	35.2042	25.5423	16.8771	19.2072	24.5493	16.9649	12.5819	15.2612	12.7811	9.46299	7.80767	9.00393	15.0535	8.63107	7.25861	8.6809	3.25248	4.76531	1.93515	10.0104	4.98033	5.38027	3.46815
YER070W	RNR1	2666	120.943	45.3652	433	41.9428	140.458	37.5927	110.302	35.5296	125.623	59.3008	135.773	56.7816	107.993	46.1131	117.534	59.8344	132.36	52.4578	135.851	47.5073	134.963	101.787	138.315	67.5415	151.261	182.128	142.65	110.27	96.8546	91.3079	20.4868	22.7183	15.9764	28.2721	21.7396	26.1543	17.8555	11.6679	8.0108	114.141	73.5292	69.0603	36.939	146.868	111.114	90.6538	62.8954
YPL220W	RPL1A	653	29.5472	45.2484	434	36.2572	42.4592	24.1429	33.9243	38.6192	30.5386	41.4361	37.7955	30.3733	26.6974	29.2335	34.7471	32.6191	39.023	27.0718	32.7549	28.5044	33.08	8.83381	41.8732	6.90663	48.6992	35.4137	27.0543	30.44	42.4818	27.1222	21.2114	22.1403	18.0097	16.4337	10.7972	16.2598	11.8121	14.8113	12.8624	19.6436	10.6577	9.60393	3.37366	20.5685	5.16593	11.4239	3.04635
YGL207W	SPT16	3107	140.399	45.1878	435	197.877	241.245	179.025	212.075	172.832	179.186	180.632	181.031	144.909	127.586	121.46	138.988	183.433	169.392	174.231	174.584	162.243	184.719	50.4977	151.902	35.8338	168.394	191.629	156.389	111.556	122.459	100.061	75.7551	66.9411	53.3514	65.6568	47.3975	59.8943	54.885	41.6103	40.919	84.6264	30.0854	69.5002	16.3374	94.0277	26.8195	74.9921	21.7931
YER073W	ALD5	1562	70.4419	45.0973	436	33.461	59.4	32.7474	45.7115	42.7082	63.9673	30.0226	46.8082	42.1187	55.7437	25.6252	57.463	39.1036	56.4639	43.533	53.6362	28.8237	58.6874	41.4002	72.2757	40.9913	93.9953	130.303	124.416	109.498	108.17	109.894	47.6928	45.8413	41.3449	76.9111	65.6251	71.4048	43.4575	50.7741	48.6289	52.5318	37.8391	44.1707	26.9722	66.9847	52.0924	45.6217	35.8063
YOR335C	ALA1	2876	129.39	44.9894	437	145.402	184.097	125.142	146.047	124.036	140.458	148.541	148.662	117.528	120.482	110.207	129.902	136.273	130.608	119.294	141.174	109.626	136.239	23.0074	140.32	18.9708	148.327	198.292	156.05	145.683	145.282	124.805	76.8749	63.068	54.0776	84.8553	56.2501	76.9127	48.457	45.0201	43.4765	102.236	33.2798	70.9298	14.9332	101.647	23.4787	72.8916	15.7239
YFL031W	HAC1	968	43.5423	44.9817	438	49.6789	67.9776	42.3545	54.528	42.89	52.3106	58.4737	57.0808	45.8592	61.1863	53.4521	46.3574	45.5881	53.0394	40.5581	49.0505	48.2259	50.1212	20.2386	65.9279	17.9393	65.2452	57.0075	48.0023	44.0736	43.2489	37.9279	26.8107	29.6552	24.2066	24.1832	21.8847	27.0448	17.5258	18.3277	19.5193	19.594	7.37615	16.3487	7.99747	18.676	8.38303	18.3519	12.6306
YCR009C	RVS161	797	35.8188	44.942	439	38.2145	53.3957	31.3273	38.7159	36.2566	33.6214	47.3083	53.8828	39.8743	37.7544	28.9277	40.8888	46.2758	54.6322	39.7648	48.3954	44.4732	55.0422	12.2618	53.2324	9.05935	51.6329	51.0846	36.2138	31.4689	33.084	31.4445	13.8994	14.5675	13.2652	12.7731	11.0875	11.4116	14.1196	8.7909	9.25191	16.7169	4.73351	12.1699	3.49354	16.3851	5.01126	13.2296	3.81966
YLL050C	COF1	610	27.3832	44.8905	440	29.826	37.956	24.6441	32.5827	31.804	32.8507	42.8421	36.7294	25.8098	32.541	25.4417	36.4297	33.2086	42.8457	32.4266	37.3406	32.9756	32.0776	7.91087	40.8709	5.74058	40.4849	36.0307	26.4606	23.323	22.2478	18.6938	13.4383	12.4286	11.6676	11.2154	10.2458	9.53163	13.4053	7.03272	6.8073	16.3201	6.44687	8.87081	2.63728	15.6879	4.05232	12.1609	3.25725
YBL056W	PTC3	1406	62.9967	44.8056	441	74.3785	91.03	60.9002	87.7815	67.4245	74.8533	79.2331	73.362	59.1008	56.3739	53.0851	62.0062	64.9434	76.5328	66.2416	69.6861	65.8714	71.81	23.2052	85.5281	16.1005	84.4902	97.6037	69.6288	55.9066	57.5374	45.708	39.8538	34.5111	29.5321	26.6366	14.7736	23.153	32.909	21.258	20.2339	45.984	15.8558	33.2838	7.68921	45.1711	14.3532	33.424	9.25622
YNL190W	YNL190W	614	27.4447	44.6982	442	19.2005	39.5643	20.9684	29.5161	19.2641	27.3595	18.7745	22.3865	17.0569	21.5985	14.311	19.6031	17.292	28.9885	15.4696	29.07	20.999	28.0679	16.8106	38.5322	13.6787	39.1941	45.1618	30.6163	29.754	30.9743	24.5289	11.7914	12.9489	9.05328	16.3558	9.28793	12.5659	7.85641	6.49994	6.76969	22.9176	12.371	17.1551	7.56934	25.5488	13.982	17.1726	11.2481
YNL229C	URE2	1064	47.5191	44.6608	443	64.5919	78.0563	50.0401	59.5113	56.3385	49.2279	71.6241	68.2256	53.3403	44.7439	50.333	60.7442	59.4413	57.977	55.9285	53.6362	55.4917	65.7043	10.9434	53.5665	7.44481	60.0819	63.1771	56.8225	51.5336	51.9755	45.4919	30.3679	26.0712	22.4153	34.1524	26.3255	27.4735	19.4487	14.1187	19.7073	24.3065	6.82439	19.2445	3.23666	24.9512	4.98033	17.8728	3.23382
YPR187W	RPO26	543	24.2152	44.5952	444	26.9366	28.3061	23.5581	29.0369	24.1711	26.3962	39.5339	37.1171	28.8023	23.9474	28.8054	30.2039	29.8681	32.0148	33.8149	29.07	31.4586	31.8953	6.19685	34.4117	5.24725	38.2553	28.5037	26.1214	22.98	24.4534	17.6132	13.2407	14.1628	14.0883	11.7606	10.1297	10.7849	11.922	8.3114	8.72538	17.8579	5.83703	9.49396	2.00365	14.6918	4.48539	11.7924	2.15588
YLR448W	RPL6B	914	40.702	44.5317	445	42.1292	55.5401	40.4331	48.4907	39.0735	40.1722	48.8797	48.165	30.8222	29.8484	32.2302	45.8526	41.0686	43.5624	35.7982	46.3482	34.8919	49.0276	6.85609	36.5276	7.13088	54.0972	43.1875	39.1821	45.5313	49.3863	44.1952	20.9479	19.5967	16.2184	17.7966	13.9609	15.7651	15.9326	10.6556	12.2231	41.1227	14.6652	21.6272	5.80544	38.3979	9.58945	24.1375	6.81914
YIL051C	MMF1	437	19.4597	44.5301	446	9.41383	14.9036	8.60456	13.608	16.629	18.0149	19.8496	24.8093	15.5607	27.2703	9.90759	21.2857	13.4603	23.2545	10.8089	19.8986	12.2162	18.4993	33.2916	51.896	16.7733	34.9695	34.6734	28.4961	15.2629	18.412	9.50899	5.46754	5.14487	4.50243	7.47693	7.40132	7.38784	4.56001	4.10242	3.72333	11.2604	10.3092	6.81806	4.0073	13.0483	9.52758	7.11227	6.20987
YJR105W	ADO1	1022	45.4823	44.5032	447	65.4308	93.0671	53.3817	68.6152	68.3332	82.4639	91.5565	73.7496	73.4645	65.5976	72.9003	57.3789	38.6123	42.6864	31.8317	33.0006	40.8802	34.9937	16.3491	65.037	10.4048	56.3268	76.01	58.5187	47.5892	43.2489	32.6331	22.1337	19.3655	16.3153	28.35	25.1064	31.1015	18.0752	14.3318	8.98865	14.2863	4.96583	10.667	3.44216	13.5962	3.52644	10.5026	3.65562
YER133W	GLC7	1463	64.7986	44.2916	448	75.9631	91.8877	70.006	83.5649	60.6094	68.6878	62.9399	67.5473	48.1783	65.0247	49.9661	58.2202	61.9959	90.6289	57.5151	74.4356	55.2521	78.6447	20.4364	95.9964	15.3381	85.781	88.596	81.8414	67.7396	59.1676	62.4568	36.1648	25.5509	26.8209	27.7659	21.2752	24.2743	29.7225	22.3768	18.0525	44.843	11.8193	27.8954	7.07271	41.6849	10.6721	30.0337	7.42841
YGL103W	RPL28	960	42.4124	44.1795	449	61.3297	64.5466	45.3619	51.2698	57.0655	62.5223	51.7745	49.9094	46.8317	45.6605	46.6635	47.7036	47.0618	46.1905	43.0372	49.2962	45.6709	49.3922	13.2507	35.6367	9.59753	35.4389	42.2003	39.4365	39.7863	39.7008	38.6843	35.5061	32.6034	29.4353	31.5433	26.0062	34.7954	26.6459	21.631	22.1143	47.5217	23.1739	24.3397	7.48371	45.2209	14.6626	24.764	7.70961
YNL308C	KRI1	1775	78.3316	44.1305	450	121.541	136.277	96.8222	93.9147	97.502	90.2671	143.827	112.417	106.905	65.2539	97.3023	104.241	112.005	62.9146	119.493	85.6542	94.6952	94.1367	17.9972	73.1667	14.6205	108.429	109.696	104.655	91.5771	116.13	85.797	70.4852	59.5417	53.7387	66.7471	48.3553	58.0143	42.1939	38.307	45.6954	42.71	11.9064	23.7166	5.54856	37.1529	10.9196	22.1475	4.92103
YLR061W	RPL22A	754	33.2464	44.0933	451	34.9523	47.1769	30.1577	36.9909	38.0739	37.1858	42.7594	38.9584	27.3061	30.3067	33.4534	39.3744	34.8788	42.5271	30.1459	38.7327	31.9377	39.0034	7.38348	35.1913	4.97816	39.3114	34.1798	29.853	39.0146	37.8788	31.5526	18.9717	16.4751	15.9764	15.8885	16.428	16.8865	13.4053	13.3196	11.3956	31.0032	12.6324	15.0291	4.05867	30.2801	6.99102	18.315	4.10086
YNL153C	GIM3	389	17.1411	44.0644	452	21.0646	25.4112	15.8725	18.4954	19.4459	16.9552	30.6015	27.9105	21.1715	17.2444	21.1607	22.9684	26.8223	21.5025	24.8902	22.6009	22.7556	22.8735	4.4169	22.7184	2.6012	29.1022	20.73	21.3721	17.921	18.7956	15.8843	10.1446	10.2897	7.93977	8.02212	8.33012	8.41026	7.80147	7.88517	7.10818	9.02814	1.80048	4.36209	0.616507	7.42061	1.33015	4.34843	0.796738
YMR308C	PSE1	3269	143.937	44.031	453	194.149	215.834	168.75	188.021	165.835	172.635	199.737	161.551	154.335	126.956	143.966	138.82	178.815	174.648	168.976	167.623	171.106	182.077	29.3361	133.081	22.2447	144.924	196.195	158.17	137.28	141.542	110.326	73.2519	65.2068	52.0927	73.0558	53.4346	70.976	56.3134	43.7414	42.1601	128.775	36.6484	80.0572	17.6903	130.732	31.1193	85.6052	18.325
YPL210C	SRP72	1922	84.6019	44.0176	454	129.184	130.701	107.014	121.897	120.219	99.9971	130.429	115.906	107.653	75.1651	83.8476	98.0153	115.837	102.256	112.551	104.406	111.223	108.809	26.3036	94.6601	21.7963	101.623	111.3	94.3932	74.4279	84.1964	73.1544	50.1301	40.8699	38.7306	37.5404	29.6343	32.5197	40.4358	32.6595	28.6584	54.3176	19.5439	35.9231	8.23722	58.2195	16.0237	37.625	8.36575
YDR429C	TIF35	824	36.2466	43.9886	455	44.2729	64.0105	37.7598	44.2741	46.9791	42.966	61.782	50.2001	39.5751	31.2806	37.6121	44.9272	47.1601	42.0493	44.9213	40.3705	46.4693	51.8527	9.29527	42.3186	8.65572	49.638	50.3443	41.0479	34.0413	42.1941	26.582	22.7265	18.903	18.6391	19.549	16.1958	17.4802	16.3721	10.6024	12.0726	21.9255	5.51759	12.9396	2.89416	21.5148	6.06301	13.3401	3.96026
YDR447C	RPS17B	724	31.8006	43.9235	456	34.0203	42.7809	21.7202	38.1409	32.531	33.6214	40.8572	42.4472	26.5579	29.9629	30.3344	39.0379	33.7981	34.8021	32.4266	35.4572	27.6261	35.7227	6.26277	33.6322	5.42664	49.4033	26.6528	26.6303	31.8977	41.2351	30.7962	17.4566	13.8738	13.2652	13.0457	12.7709	14.215	11.5923	11.0286	9.85366	30.2591	15.7687	12.903	3.54492	31.7742	7.88809	14.5194	3.53845
YOR361C	PRT1	2291	100.555	43.8914	457	122.939	152.896	110.523	130.043	107.316	111.943	130.925	117.65	93.3643	87.5972	104.886	97.3422	111.121	108.866	103.825	102.032	92.4595	101.154	26.5673	109.583	20.4957	118.404	123.763	108.387	104.353	107.499	86.1212	55.2683	48.6739	39.36	52.689	43.6243	49.9669	43.1828	35.6964	32.1184	92.3152	27.3266	55.6441	13.1008	93.3304	23.3549	61.9836	15.3255
YNL110C	NOP15	662	29.0518	43.8848	458	38.6806	36.4549	29.2388	29.0369	31.6223	27.3595	52.5188	41.9627	39.9491	20.911	33.9427	40.2157	39.8896	25.1658	40.4589	30.544	31.9377	34.2647	5.86723	26.9503	4.30543	46.2349	38.7453	32.3973	30.1827	49.5781	40.7374	26.8766	22.1403	20.6725	20.5226	16.0507	18.1068	16.9215	10.336	15.4199	22.0743	5.43047	11.2168	1.76389	18.1282	4.73286	9.28649	1.05451
YDR341C	YDR341C	1823	79.9964	43.8817	459	92.5538	110.758	78.1093	89.6023	81.4183	87.2807	97.8422	89.2554	76.3821	76.1964	80.3004	77.9074	86.7549	81.7094	81.5128	74.1899	70.0233	78.9181	23.0734	89.6486	21.5272	105.613	111.424	90.7464	105.897	99.1561	95.198	42.2911	36.5921	37.0846	64.0212	48.5585	54.0565	35.6011	33.2456	28.884	60.5679	22.506	42.7412	14.5907	59.7135	18.5912	42.0103	13.4742
YGR279C	SCW4	1160	50.835	43.8233	460	39.9855	65.0827	32.5804	56.7322	36.7109	59.7285	48.797	63.3801	37.3307	51.1031	37.8568	52.4992	43.2301	53.1987	37.0874	60.8423	44.8724	58.0495	22.1504	58.5779	16.3248	61.6074	78.6012	56.4833	44.5881	41.2351	36.5232	16.9296	16.8798	12.3938	24.4947	18.2856	24.7031	14.669	10.6556	9.51518	41.1723	25.9327	29.8382	16.6286	48.8067	26.9123	33.424	22.3321
YKL117W	SBA1	650	28.4399	43.7536	461	33.1814	40.3148	23.3075	37.1826	34.6209	31.791	43.5865	42.1565	27.6801	26.1818	24.2797	32.8961	33.1103	44.3588	31.2367	38.3233	33.5345	42.1018	11.3389	43.4323	10.1357	41.4237	39.2389	30.1923	25.1237	23.5903	19.2341	12.9113	11.1568	11.2803	11.0596	9.54916	9.96039	11.1528	8.57779	7.33383	13.443	5.77895	9.78721	3.45929	14.3432	4.14512	11.4607	3.46815
YHR064C	SSZ1	1616	70.6998	43.7499	462	93.2994	108.721	81.4509	91.5189	73.7853	83.0419	98.5038	85.5728	70.0232	59.2384	70.5151	76.1406	72.9016	67.8522	63.465	70.5869	70.3427	71.5366	19.9749	74.0576	16.3696	86.3677	106.488	77.3465	87.5471	82.0867	62.2407	46.1777	41.8526	35.4385	42.2524	32.74	38.6542	33.5683	28.8235	28.207	59.0797	23.6966	36.6562	11.0457	53.1396	17.6013	34.9349	10.8731
YOR355W	GDS1	1568	68.5781	43.736	463	177.931	153.003	155.133	131.097	158.293	103.562	131.173	88.3832	119.623	68.1757	89.2295	79.0853	126.055	86.647	117.609	83.607	127.751	85.0238	7.7131	48.3323	5.2024	55.6227	75.6398	56.5681	54.2775	55.14	51.0028	70.8145	65.3803	54.126	43.226	37.9935	42.2822	59.9944	44.7537	43.0251	40.6762	9.75743	31.5977	4.31555	53.6376	7.11475	37.2197	4.87416
YBR121C	GRS1	2003	87.3895	43.6293	464	118.465	140.566	93.1464	105.606	99.0468	109.149	111.075	92.3566	87.3794	76.1391	88.679	80.9362	96.6782	95.248	92.3217	89.9123	86.072	95.7771	18.5905	94.6601	15.5175	101.271	126.354	95.0717	95.007	95.1285	81.4748	56.454	49.7722	43.6203	48.639	36.0198	41.6885	41.2049	38.4136	32.3817	72.0267	24.5678	47.9463	11.9705	72.463	20.045	48.9383	14.4116
YNL189W	SRP1	1628	70.9044	43.5531	465	99.1714	110.973	83.3723	92.3814	88.3243	85.7393	103.053	85.5728	74.3622	67.5455	65.1944	78.4122	84.1021	87.3637	83.0003	75.7458	76.331	82.4722	26.5014	86.6418	21.0338	86.4851	94.7657	76.1591	75.4568	68.0859	68.3999	40.5784	38.442	32.2916	34.6976	28.2121	30.2769	33.843	24.2949	24.8974	50.3988	17.2788	32.7707	8.6311	49.753	15.0647	32.9449	8.01425
YDR368W	YPR1	938	40.7959	43.4924	466	36.8164	64.761	33.1651	48.0115	35.4388	42.966	41.0226	49.4248	29.7	46.5772	33.2088	48.0401	29.9663	54.1544	27.6668	45.038	33.6144	45.8381	11.2071	62.0302	10.9878	63.1329	63.0537	52.4124	48.361	32.8922	39.6568	13.1748	11.9083	11.1835	15.9274	14.4543	14.3469	10.7133	10.1229	8.57494	18.4531	5.45951	12.2432	2.85991	20.2199	4.48539	12.6031	2.57768
YNL241C	ZWF1	1517	65.9374	43.4656	467	37.8417	96.7126	34.0841	78.8692	35.7114	77.9361	44.9925	90.9029	21.2464	74.5349	44.8288	90.275	28.9838	66.8966	20.7253	64.7729	29.5423	67.2535	76.4058	79.1804	83.3281	97.2811	69.1	77.2617	77.772	62.0445	52.1914	16.7979	15.608	16.1216	17.0567	15.18	16.8205	10.933	13.2663	12.035	42.3132	22.9706	32.8806	21.1667	40.0912	31.3049	38.7674	42.9536
YOL121C	RPS19A	824	35.8147	43.4644	468	45.4846	56.0762	30.9931	38.9075	37.347	43.255	48.2181	44.0947	33.0665	33.4577	35.0435	45.3478	42.9353	49.376	40.5581	40.698	36.888	45.1091	7.4494	42.0959	6.86179	45.2961	37.1412	31.634	45.7028	35.6732	32.8492	16.4026	17.3422	17.574	17.4462	16.5732	15.5342	16.0974	15.504	10.2674	29.3166	14.4038	15.5422	4.45255	27.3915	8.1665	16.3619	4.99133
YKL103C	APE1	1544	67.1018	43.4597	469	35.2319	92.9599	28.1528	81.0733	39.7096	69.9402	67.2407	119.589	44.5126	94.1283	43.8503	90.4433	33.7981	87.3637	33.0216	78.2843	37.5267	74.9995	76.3399	130.965	57.7646	127.439	107.722	76.2439	51.7908	46.5094	34.7943	17.7201	15.2612	12.9748	16.3168	12.0163	12.2361	17.9104	10.8155	13.8403	13.9887	6.21455	18.4381	10.0011	20.967	10.6103	23.1057	19.6372
YLR287C-A	RPS30A	621	26.9176	43.3456	470	27.2162	35.4899	22.0544	26.7369	24.9889	26.0108	35.2331	42.3503	25.4358	23.0881	28.0103	37.3552	29.475	39.5008	30.1459	36.9312	25.63	40.6437	8.89973	34.3004	7.93815	39.4288	27.1464	27.8176	31.9834	33.9471	26.2578	10.5398	11.5037	9.97313	11.7216	12.7709	12.8628	11.922	9.37696	7.78515	15.2288	8.56679	7.73446	2.99691	14.0444	5.04219	8.0704	2.69485
YNL096C	RPS7B	917	39.7369	43.3336	471	43.2477	59.7217	33.4158	44.7532	37.2561	39.0162	50.3685	49.3279	30.1489	31.166	33.5146	48.2084	38.7106	45.633	40.1614	46.4301	36.4888	46.3849	8.30641	45.9937	6.503	52.4543	41.5834	32.5669	45.8743	47.1807	41.7099	17.9836	19.7123	16.6542	14.1361	13.1773	14.4129	16.1523	14.1187	12.7872	32.8386	8.97335	20.8574	4.29842	33.3679	7.42409	23.6953	5.1788
YHL034C	SBP1	884	38.2982	43.3237	472	44.0865	68.2993	42.0203	47.724	46.0704	48.5535	51.9399	51.1692	42.3431	35.9211	41.0982	41.2253	50.1076	50.0928	45.7146	47.0033	49.2638	53.2196	10.8774	53.7892	9.77692	55.5054	56.3905	44.7795	33.6983	31.4538	26.7981	15.4145	16.7642	15.2502	16.3168	11.9582	13.3905	13.4603	10.4958	9.10147	18.1555	6.44687	13.8561	4.86356	19.2239	6.46514	15.9934	5.76463
YLR455W	PDP3	914	39.4918	43.2077	473	42.4088	55.004	34.6688	49.449	38.6192	40.3649	52.2707	55.0457	39.7995	31.6816	28.9277	48.5449	46.0793	53.7562	45.913	49.2143	47.7468	59.143	14.3714	51.2278	9.55268	58.2043	54.4162	42.3201	28.2963	36.5362	32.8492	24.2416	21.7356	16.8962	16.6673	11.6389	14.6438	20.0531	16.2499	13.2009	27.3324	5.11103	16.8985	2.80853	24.7022	5.3206	18.8309	3.28069
YNL070W	TOM7	182	7.85081	43.1363	474	12.7692	12.2231	7.60209	10.5414	14.0846	12.6201	13.2331	12.2108	10.7728	8.82274	11.3754	7.99266	10.7093	10.9105	10.3131	8.84383	9.82083	7.83713	2.50511	13.141	2.19757	6.33676	11.7223	7.71769	5.57351	7.28807	5.18672	4.74293	4.16214	4.7445	4.51731	3.88932	2.86938	4.56001	3.35653	3.30963	6.89511	1.85856	3.15243	0.753509	5.47831	1.67042	3.0955	0.867038
YIL148W	RPL40A	820	35.3463	43.1052	475	39.8923	44.7108	27.3174	38.045	31.9858	38.4382	47.3083	46.6144	31.5703	32.2546	34.7377	42.8239	35.0753	42.0493	32.625	41.1074	32.4167	39.2768	7.38348	41.3163	6.95148	44.8267	36.2775	35.196	41.244	36.9198	36.5232	15.678	14.7409	12.8779	14.0971	15.8185	15.2374	16.6468	10.2827	9.02626	34.674	16.2914	16.7519	5.44581	30.0809	9.80598	20.6735	6.25674
YER009W	NTF2	377	16.2459	43.0926	476	19.1073	24.6606	15.5383	18.1121	15.3568	16.7625	23.3233	21.5143	16.1592	14.6091	13.944	19.5189	21.4185	23.0952	17.3537	14.9854	17.3262	19.684	6.52647	23.9434	6.81694	25.1124	19.1259	13.1455	19.0357	18.0284	17.181	9.02474	11.1568	9.00487	6.30866	6.15326	6.9261	8.68051	8.68435	6.20555	12.6989	6.12743	5.6084	1.62689	11.5044	3.83578	5.96989	2.08558
YJR122W	IBA57	1493	64.3292	43.0872	477	69.4386	96.0693	61.2344	83.1816	69.2419	83.4273	89.6542	100.303	66.6567	83.816	67.6407	93.4721	53.6446	66.1002	49.9787	69.2767	49.5832	68.6205	25.3148	73.9462	19.7781	76.3932	91.3107	84.8945	65.7675	65.6885	57.0539	29.3139	26.4758	24.0614	36.0995	31.1726	34.2017	24.0087	19.6597	22.1895	33.1858	9.26375	23.8265	5.68556	30.1805	8.04276	22.2949	5.3194
YHR183W	GND1	1469	63.1759	43.0061	478	52.9411	77.0913	52.4627	62.6737	48.7056	67.4354	51.1955	59.8913	41.3705	59.2957	41.9544	50.8165	46.4723	70.1617	39.6656	62.5619	42.7965	63.6995	22.9415	111.922	26.7296	119.46	92.7914	79.806	70.655	60.3184	56.5137	28.8528	26.0712	21.8828	25.1567	20.2303	22.5593	25.2724	18.2744	12.8248	47.1745	19.3697	34.1636	11.6109	40.6889	14.8172	39.5044	15.9816
YNL104C	LEU4	1859	79.8236	42.939	479	81.369	107.649	76.1879	82.7024	90.4143	99.9971	68.1504	74.2342	73.2401	78.7172	59.0174	65.624	72.9016	99.9466	59.4984	88.4383	65.2327	93.59	69.0883	98.1124	65.6579	108.664	110.93	103.977	95.6072	71.3464	73.5866	61.3946	52.2002	50.0109	102.029	78.5701	83.6409	50.27	51.893	46.2596	47.2737	38.0714	48.4962	39.8846	62.6021	48.9062	51.0388	57.0136
YGR094W	VAS1	3314	142.188	42.9053	480	172.618	221.303	159.31	181.217	155.385	165.024	181.293	155.737	144.161	123.175	127.82	142.858	164.569	156.012	142.003	156.077	144.997	158.292	25.7763	136.31	20.092	160.062	219.146	177.337	142.425	132.911	123.185	84.4504	72.0281	59.742	98.0178	74.7098	88.2913	59.3351	49.7618	48.9298	109.181	38.6522	83.3929	21.8004	121.021	29.6964	82.7677	22.2149
YDR158W	HOM2	1097	46.9451	42.7941	481	42.2224	60.5794	39.7648	48.3948	45.0708	47.1085	49.2933	38.4738	37.7048	42.796	39.4469	44.0858	50.4023	55.2693	47.3013	54.9464	42.0779	52.1261	20.766	62.8097	19.8229	65.3625	64.9046	53.5997	65.4245	54.9482	54.6767	27.9964	23.412	23.7709	58.2188	46.4687	45.8112	25.0526	24.1883	23.7315	28.9198	16.1462	28.8484	14.0598	30.8777	16.9517	29.8863	17.1064
YPL260W	YPL260W	1655	70.8165	42.7894	482	99.8238	116.334	82.704	106.564	88.506	88.0514	99.2482	95.3608	79.9731	64.3945	65.2555	81.5252	96.1869	93.4959	95.7925	88.4383	98.5277	93.1343	31.182	90.4282	21.3926	93.6433	106.858	78.1946	57.1071	57.8251	50.5705	36.4283	35.725	28.3218	27.3765	18.692	22.4933	28.0194	22.1637	21.7758	37.055	12.342	29.3983	7.84334	37.1031	13.3634	31.4709	10.053
YAL025C	MAK16	920	39.3599	42.7824	483	55.3645	59.5072	39.4306	40.92	48.7056	41.521	72.782	56.3055	45.934	28.989	52.2901	54.7708	57.4763	35.3596	58.4076	42.4176	50.1421	49.5744	7.25163	32.6299	6.63755	52.2196	49.9741	49.9529	52.734	65.4008	42.6824	29.775	25.3197	25.5138	26.7144	27.1092	30.3759	23.6242	13.4261	19.5945	25.7451	6.24359	15.2123	3.01403	23.0587	6.80541	13.9297	2.36678
YDR238C	SEC26	2921	124.954	42.7779	484	166.932	210.902	156.386	187.254	151.841	154.716	171.038	151.376	138.101	117.961	114.243	132.173	142.757	143.509	134.07	140.601	144.358	155.558	40.8069	142.547	30.3623	153.725	192.369	138.834	99.8088	102.512	94.9818	76.5456	65.5537	51.2212	55.8433	36.8325	44.426	50.8744	39.2128	39.189	82.8406	28.4882	60.776	15.7038	85.1628	24.0664	68.3589	17.6454
YPR024W	YME1	2243	95.5812	42.6131	485	108.026	143.353	96.7386	134.068	98.0472	109.245	122.489	126.373	82.5166	94.8731	80.6062	116.356	97.6607	112.928	97.4783	113.414	93.0983	119.471	26.7651	107.356	21.1684	132.837	144.123	109.065	96.6362	85.0595	75.9639	46.8364	44.3961	41.2481	48.7169	30.3599	35.1582	34.0078	29.4096	28.7712	55.7562	14.9265	39.3321	8.9736	53.1396	13.5799	43.3001	10.4748
YPR181C	SEC23	2306	97.9374	42.4707	486	105.23	169.837	103.338	135.41	92.5042	126.201	123.729	112.32	81.6189	94.8731	95.7734	95.1548	88.9164	125.829	83.9919	111.694	102.999	118.286	24.3919	115.04	19.8678	117.113	140.668	103.722	92.5203	74.7027	63.4293	40.9077	35.0891	33.4051	46.7308	30.7663	39.083	27.47	27.0121	22.1519	67.9094	20.9959	51.6853	12.0733	70.7199	15.7453	57.5983	12.6541
YNL118C	DCP2	2912	123.614	42.4497	487	157.891	192.567	141.85	171.059	144.027	142.289	165.414	170.176	139.598	119.852	108.494	144.793	142.168	139.209	130.698	140.519	132.302	162.028	45.2897	125.397	32.7392	147.271	206.93	171.909	106.84	108.458	98.9799	65.347	59.0792	45.9926	59.2313	47.4846	57.1568	46.7539	33.6185	37.4213	68.7527	23.7837	54.801	14.8475	71.218	23.324	56.1611	19.356
YKR008W	RSC4	1877	79.6613	42.4408	488	109.983	137.027	106.513	123.91	106.407	94.7949	116.369	125.5	99.6484	77.8005	73.2061	101.549	113.381	88.7972	107.692	92.2051	102.201	103.159	29.8635	83.3009	22.469	87.4239	126.354	95.5806	58.822	72.3053	58.1345	41.6324	36.4187	29.0964	28.0385	25.745	26.9458	30.0521	21.5244	20.4219	45.6367	14.0263	35.5199	7.62071	42.1332	14.3842	32.6501	8.50635
YER090W	TRP2	1523	64.5797	42.403	489	77.9204	93.8177	65.5784	81.0733	67.9697	70.2292	91.4738	83.8284	60.7466	65.3685	61.8307	74.3738	71.1331	66.0205	60.6884	64.5272	61.7994	65.2487	34.2145	81.4077	27.5368	99.9801	92.2978	76.668	75.3711	81.4154	63.4293	44.0038	37.4014	33.2599	46.2245	34.1622	36.2796	33.7881	28.6104	28.207	35.0212	11.3837	31.671	10.4635	34.5631	11.9404	29.3704	12.3963
YOR117W	RPT5	1304	55.2674	42.383	490	72.794	91.3516	49.2047	68.7111	60.6094	66.6647	73.0301	72.4898	56.7816	50.9313	51.6785	55.7804	61.5046	74.8604	60.5892	66.2469	63.3963	74.4528	18.9861	78.5122	17.0423	85.1943	65.7684	54.5327	54.0202	49.5781	43.3307	28.2599	26.9383	25.1265	25.4293	18.0534	23.6147	25.8767	15.2376	15.8336	32.789	10.3963	23.7166	5.77119	34.6627	11.198	23.8795	8.06111
YGR034W	RPL26B	860	36.4451	42.3781	491	36.9097	48.5708	27.9022	36.0326	39.5278	41.521	46.1504	43.3194	34.0391	39.7596	35.9609	40.7205	39.7913	45.1552	31.7325	43.2365	33.0555	40.097	7.84495	44.6573	5.15755	43.5359	37.6348	28.8353	36.8709	42.29	31.8767	18.3788	21.2732	14.2819	16.7841	15.238	16.7216	14.1196	12.0942	10.6811	37.7495	20.2989	19.5011	6.18219	38.7964	9.71318	19.052	5.62403
YNL212W	VID27	2348	99.437	42.3497	492	100.756	143.675	89.5542	125.347	92.4134	115.315	123.068	158.644	80.1975	123.404	88.2509	131.837	87.4426	121.369	87.7602	117.181	87.1898	119.926	30.9842	120.051	24.3526	129.317	151.897	114.239	81.802	83.7169	77.6928	38.4045	36.0719	33.9861	43.6154	28.7345	34.9273	33.8979	26.6391	25.0102	49.1587	17.1626	40.1752	10.0525	51.4463	12.4663	39.615	10.2639
YMR229C	RRP5	5189	219.596	42.3195	493	331.534	365.299	310.767	295.352	271.425	251.92	288.399	236.948	213.661	158.064	229.832	214.035	239.73	183.567	223.02	192.19	196.337	200.394	51.5525	191.436	40.2289	250.067	321.068	277.752	276.875	313.771	261.497	180.034	162.67	120.404	142.295	117.725	131.827	121.307	109.647	97.1451	188.797	67.4889	104.617	24.6774	174.111	57.1345	100.088	25.0504
YAL016W	TPD3	1907	80.6239	42.2778	494	109.051	124.483	92.4781	121.418	95.1394	102.598	102.391	98.3651	81.3197	76.1964	72.1664	80.5997	92.9447	96.7611	85.9752	96.7908	88.2278	93.9545	33.5553	110.14	23.6799	95.9902	120.185	83.792	75.3711	68.3736	62.4568	45.0578	41.9104	37.1814	32.7894	21.5074	29.9471	37.3042	30.9546	24.8974	53.3255	17.424	38.0858	10.2922	53.6376	15.8381	41.347	10.4279
YMR161W	HLJ1	674	28.4703	42.2408	495	37.8417	47.8202	31.3273	38.4284	44.8891	33.236	57.3985	50.297	37.2559	30.4785	36.2055	37.7759	46.6688	43.9606	47.4996	44.2192	43.9143	44.1067	8.83381	35.3026	6.68239	45.0614	33.933	23.4075	20.0647	22.8232	18.6938	16.1391	15.4924	14.3787	11.0986	7.74962	9.39971	12.4164	10.4425	10.8691	13.4926	3.28152	8.28431	1.57552	11.9527	2.59843	7.70189	1.99185
YFR052W	RPN12	824	34.7739	42.2014	496	37.3757	49.643	33.8335	43.7949	36.8927	36.4151	48.5489	53.6889	34.3383	28.3015	23.7904	41.3936	38.9071	49.0575	37.7815	42.0082	37.6066	54.9511	15.4921	46.2164	9.55268	47.4084	44.7916	34.772	32.0691	32.0292	28.527	14.0312	15.5502	14.2335	13.1236	11.0294	11.4775	12.3615	11.0819	9.96649	23.4632	6.27263	13.5261	2.96266	20.0705	6.86728	14.0034	3.81966
YNL066W	SUN4	1262	53.1783	42.1381	497	28.6143	73.7675	28.5705	58.6488	26.261	58.2835	37.3835	62.3141	35.7597	60.6134	31.3129	54.6866	23.58	48.9778	23.5019	45.2837	28.664	46.7494	41.3343	74.2803	31.6629	66.3013	93.7785	67.5934	63.1951	58.2087	44.3033	9.41998	8.96016	7.55247	16.4726	12.0163	16.8535	6.70267	5.48766	4.814	36.1125	22.0994	27.7854	16.6799	40.0912	28.5209	28.707	24.4177
YFL016C	MDJ1	1535	64.5799	42.0716	498	88.3595	128.557	71.1756	108.002	61.6998	79.5738	120.338	98.462	49.1509	54.1395	92.3485	81.0204	109.549	96.5222	92.1234	98.6742	110.105	106.348	9.49305	74.2803	13.0508	96.929	72.6784	75.2262	47.2463	39.6049	38.2521	15.9415	12.8333	12.3938	18.6534	11.9582	15.1055	12.9109	10.8688	9.10147	23.8601	4.50119	19.0246	2.91128	25.499	3.18617	21.6316	2.78858
YNL113W	RPC19	428	17.995	42.0443	499	20.319	24.5534	16.875	19.4538	19.4459	18.2076	36.391	31.7869	27.8297	16.1559	22.6284	28.7736	26.8223	22.8563	28.1626	21.9458	24.6718	28.5235	4.15321	18.5979	3.54301	28.046	19.1259	17.81	21.2651	24.0698	15.7763	13.57	12.024	9.44058	11.3322	10.2167	12.9287	6.97737	6.87289	7.52188	10.2683	2.4684	4.76531	0.993261	9.06411	2.35096	4.7538	0.843605
YOR168W	GLN4	2429	102.002	41.9934	500	158.637	177.664	130.071	138.38	134.94	142.674	135.06	113.386	114.536	93.1544	105.803	104.494	118.588	109.503	110.072	107.764	102.44	108.809	26.7651	95.551	18.7914	109.485	133.881	123.144	99.6373	109.417	86.2293	70.2217	67.2879	57.6118	64.4885	48.2102	62.9286	48.2922	45.7127	42.7243	79.9635	29.3013	52.9682	13.2035	78.3896	19.3954	52.0338	10.9903
YPL204W	HRR25	1484	62.1682	41.8923	501	77.3611	90.4939	60.8167	83.1816	63.5172	73.3119	85.3534	78.4013	66.5819	59.0665	63.7266	74.1214	82.1371	82.0279	76.0588	77.1379	80.4031	85.0238	19.6453	66.4848	14.2618	72.4034	98.961	75.7351	46.8175	58.6881	37.2796	28.1941	26.2446	23.0447	33.0231	29.1119	31.0025	19.5586	16.9957	19.9706	43.2557	12.8357	28.9951	5.99382	43.1292	11.3527	28.4491	7.24094
YGL190C	CDC55	1580	65.9324	41.7294	502	91.7149	101.109	85.6279	100.24	90.6869	78.3214	102.887	87.4141	83.0403	58.4363	60.6687	72.1864	99.0362	93.7348	94.1067	87.7832	101.402	92.223	19.052	64.4802	15.5175	75.6891	86.9919	71.5794	41.8442	50.4411	43.763	32.3441	27.4586	24.6423	24.2611	18.0824	24.9669	25.8767	21.3113	18.579	47.1745	12.2839	36.7662	7.36383	43.3782	12.8684	39.5413	7.82678
YOR370C	MRS6	1811	75.5406	41.7121	503	89.478	119.229	78.6106	100.623	78.7831	87.4734	91.8046	81.7932	74.8859	64.5091	65.5613	71.8498	85.7724	83.0632	75.7613	81.4779	75.6922	90.2182	29.6658	77.2872	20.2266	87.6586	103.28	86.4211	77.0002	73.6479	70.9933	37.0871	35.3204	30.3551	42.2524	35.091	38.6542	32.0849	29.3563	22.4528	59.1789	23.3481	42.8878	12.7411	60.0622	20.8493	47.5748	15.9348
YDR151C	CTH1	977	40.7437	41.7029	504	66.456	80.2007	59.0624	70.3402	61.7907	51.6363	95.6918	56.887	44.0637	40.3325	64.8274	55.8645	76.6351	58.5345	66.6382	60.1053	80.7224	76.4576	8.83381	35.3026	8.83511	40.1328	50.3443	39.691	23.2373	29.8236	27.0142	16.6002	13.9894	10.893	14.7591	12.7709	13.3245	11.3726	9.96302	11.5461	20.6357	5.63375	14.8458	3.64767	21.4152	4.73286	15.9565	2.92918
YKR057W	RPS21A	585	24.2441	41.443	505	32.529	32.9166	24.9783	25.7786	29.2597	30.3459	39.203	38.28	29.2511	23.5464	27.093	31.4659	32.1278	32.413	27.0718	27.6779	27.4664	30.4372	4.87837	29.1776	4.17089	31.5665	25.9125	23.0682	28.725	25.6041	21.7194	15.2169	14.7987	12.539	12.812	13.3224	13.2915	12.8559	10.0163	7.67232	20.983	9.40895	8.02771	1.78102	16.6839	4.73286	9.17593	2.83545
YER087C-B	SBH1	248	10.2719	41.4188	506	14.7266	18.2274	9.35641	13.0331	11.8129	9.92264	14.391	12.4047	7.4063	10.0258	8.62327	9.92773	10.3163	12.1051	8.92476	11.3823	11.0983	10.4799	3.49397	17.4843	2.33211	16.898	13.6966	9.5835	11.147	10.2608	8.75259	5.13817	4.79802	4.40561	3.77741	2.78638	2.6715	4.77977	3.6762	2.63266	6.7959	2.3232	4.54537	1.09601	6.12574	2.10349	4.9012	1.35914
YDR035W	ARO3	1112	45.8995	41.2765	507	62.7278	66.1549	50.8755	55.5822	62.4267	61.1736	65.5038	52.6229	60.8214	59.2384	47.2751	54.3501	59.3431	59.968	56.7218	52.326	50.4615	65.1576	12.7892	50.8937	8.02784	59.8472	56.5139	49.2745	47.9322	44.2079	43.4388	25.0321	24.8572	24.8844	35.4375	32.6239	32.2558	23.5143	20.299	22.3024	18.9492	7.75367	23.7166	9.23048	24.4034	7.11475	23.769	9.74832
YOR267C	HRK1	2279	93.9401	41.2199	508	84.8176	148.714	75.3525	144.13	79.0557	92.9646	139.278	134.222	75.1103	72.3579	78.221	122.75	113.774	120.255	112.353	130.201	121.124	145.26	23.2052	88.3123	24.1732	111.48	143.259	107.369	73.6561	67.99	62.1326	30.5655	25.4353	20.2852	39.7991	21.1591	28.8917	20.3827	16.0367	19.7073	54.4168	13.8521	43.6942	9.59011	57.2234	16.3639	50.9283	16.4972
YLR413W	INA1	2027	83.5296	41.2085	509	23.5812	74.7325	22.6392	70.9152	17.6285	60.7882	36.6391	95.167	20.4234	59.8686	31.6187	84.7222	20.1413	50.6503	19.6345	46.3482	16.1285	52.3083	18.5246	56.5733	13.8133	70.2911	140.421	112.797	69.4546	60.6061	59.2151	13.8335	11.9083	9.92472	19.8995	12.7419	22.2625	10.5485	7.45895	7.63471	149.063	100.711	76.2083	39.799	149.558	126.24	84.1312	54.3188
YBL072C	RPS8A	602	24.8011	41.1978	510	30.4784	36.1332	22.6392	26.7369	28.5327	29.0936	30.9324	31.3024	22.967	19.6506	22.078	30.1197	24.366	32.1741	20.2295	28.0874	22.1967	32.8977	4.87837	27.8412	5.38179	32.5053	27.023	28.5809	34.2986	27.5221	23.4483	13.8335	11.1568	10.2152	9.96924	10.0136	12.1701	10.7133	10.9753	6.99535	16.8657	8.47967	10.7769	2.79141	18.4768	5.62993	11.0185	3.58532
YEL065W	SIT1	1886	77.6513	41.1725	511	22.4627	76.0191	29.4059	104.169	29.3506	83.3309	91.1429	191.206	73.0904	175.71	64.1547	145.046	13.6568	22.2989	9.9164	18.916	9.74099	20.413	73.7689	146.89	46.0592	135.888	102.293	71.4098	101.009	67.4147	75.5316	16.4685	19.5389	12.6359	35.9827	28.038	38.6542	18.5697	9.64336	13.5394	35.4181	16.6399	17.595	6.5932	43.0296	21.8392	27.1224	10.0998
YBR154C	RPB5	647	26.5597	41.0506	512	34.8591	35.3827	23.3075	27.1203	25.7158	27.3595	37.3835	32.4653	27.4557	21.7704	29.9062	29.9515	31.4401	31.4573	33.0216	30.2983	28.5044	33.6268	5.53761	29.8458	5.56119	44.8267	36.0307	28.072	32.9266	29.0564	24.2047	13.043	10.8678	12.6843	15.499	14.5995	15.2374	9.22991	7.99173	9.13908	23.5128	6.24359	10.7036	2.60303	19.9709	5.25873	9.91296	1.96841
YGR116W	SPT6	4355	178.655	41.023	513	263.214	349.323	245.021	284.811	251.07	230.436	261.85	228.033	229.52	168.778	176.196	182.822	263.605	227.926	248.208	233.379	241.688	239.762	52.0799	190.879	38.6592	210.873	274.672	209.734	123.818	150.652	113.135	113.83	95.8448	77.9938	78.8582	53.3186	64.4787	79.8826	58.7126	59.5733	96.3332	35.3416	71.333	20.0879	99.8546	32.7588	78.0507	24.0193
YOL136C	PFK27	1193	48.9374	41.0205	514	29.1735	45.1397	28.7376	36.4159	30.7136	34.0067	33.3309	42.7379	23.9396	38.3846	25.0136	44.6748	38.3176	56.4639	33.4183	58.4676	38.2453	65.7955	23.9963	49.8914	19.4193	52.4543	74.1591	48.0871	46.8175	49.3863	48.1933	15.2828	12.4864	11.4739	22.2361	16.3119	20.3495	12.5812	10.8155	10.0793	63.0977	35.2545	31.3044	13.5974	61.6558	37.5535	38.7674	15.9113
YPL078C	ATP4	734	30.1052	41.0152	515	37.6553	41.387	27.0668	34.3076	31.5314	32.369	44.8271	43.6101	34.1887	23.0881	23.8516	37.0187	41.7563	44.1199	40.0623	44.4648	36.1694	46.7494	14.1736	47.4414	9.86662	46.0002	31.4652	26.291	24.9522	25.9877	25.5014	20.2233	18.2094	15.2018	9.93029	8.21402	8.50921	15.8776	14.3318	10.8315	18.9988	6.73727	11.84	4.38405	17.0326	6.58888	13.9297	5.3194
YJL109C	UTP10	5309	217.717	41.0091	516	263.028	332.597	248.697	272.64	224.355	237.951	245.639	225.997	176.405	156.632	169.224	215.634	192.079	176.161	177.008	194.81	156.015	196.566	50.8273	201.348	41.6641	260.042	300.708	227.969	273.188	342.443	259.876	165.146	145.675	104.524	143.502	122.136	142.084	109.44	93.6631	95.7535	213.302	63.5975	107.439	20.0707	195.327	47.6688	107.642	17.8329
YMR235C	RNA1	1223	50.1011	40.9658	517	66.7356	80.844	55.3866	65.4528	64.8802	60.3065	67.4888	65.4152	54.1632	43.1397	50.3942	45.0954	66.5154	59.092	64.06	54.2094	49.7429	55.0422	12.0641	63.0325	10.36	62.7809	72.0614	52.7517	49.9901	53.2221	46.4644	30.2362	27.9788	26.7241	26.5976	17.8793	21.8997	23.6242	20.1392	18.8047	37.2039	11.7902	24.4497	5.70269	38.0493	11.4764	23.9901	7.80335
YDR091C	RLI1	1826	74.7789	40.9523	518	87.8934	106.362	73.9324	87.7815	87.9608	75.624	95.1956	79.3705	74.5119	60.155	66.8457	75.3834	87.9339	80.7537	84.6861	76.4828	78.2473	91.0383	23.5348	72.8326	16.863	80.1483	95.506	71.325	70.8265	86.6897	73.8027	42.2911	37.8061	30.7908	42.4471	28.6765	40.5342	30.217	26.7457	23.8067	79.4178	28.6044	45.6003	12.2445	76.2979	21.468	48.7172	12.4432
YBL099W	ATP1	1637	66.8745	40.8519	519	78.9457	102.395	80.1978	91.1356	81.6	85.7393	73.2783	65.2214	63.5146	63.5925	55.1645	56.79	73.4911	95.8851	62.4733	78.4481	72.738	77.9157	26.3696	84.6372	18.7017	75.4544	87.7323	59.7909	49.6472	44.6874	49.3819	36.2307	36.4187	31.5654	28.8563	20.9269	21.8007	38.0184	26.2129	22.8665	50.1508	22.0413	47.6531	19.6768	57.4226	22.9837	57.672	29.573
YPR036W	VMA13	1436	58.6141	40.8176	520	64.5919	91.7805	51.878	69.0944	57.7924	66.8574	74.1053	68.904	51.2456	54.7697	53.1463	69.1576	61.4064	74.8604	53.5486	66.2469	65.2327	69.2584	12.0641	78.1781	9.14905	82.8473	96.123	81.6718	69.0258	52.359	51.3269	27.5353	24.7994	21.0598	27.5712	26.3255	27.7044	21.976	18.008	16.0592	28.3741	7.86983	22.2503	3.80179	31.3758	6.89822	23.0688	5.29596
YOL154W	ZPS1	749	30.5669	40.8103	521	3.26222	8.04152	3.25804	24.9161	8.08731	62.6186	14.391	42.641	66.0582	175.022	7.33896	21.3699	1.27725	1.11494	0.892476	1.14642	1.19766	0.729036	18.7883	68.378	1.97332	11.0307	135.609	91.6793	13.1192	8.24703	5.40284	3.5572	4.74021	2.71114	10.3587	9.46208	8.54219	3.40628	1.27868	1.2035	0.198421	0.929279	0.219937	1.18164	0.249014	1.33015	0.221107	1.59348
YLR051C	FCF2	653	26.6079	40.7472	522	34.9523	38.1704	25.2289	27.6953	30.9862	27.4559	50.6993	43.9978	41.8194	23.9474	36.8783	42.2349	46.0793	31.4573	47.9954	28.6606	41.1197	35.9961	8.50419	23.6093	6.00967	32.2706	28.6271	27.5632	31.2974	36.728	32.6331	23.517	18.6718	20.1883	15.499	15.5283	16.7216	17.2511	15.8769	13.3137	18.7011	5.48855	9.05409	2.00365	15.0902	3.80485	8.18095	1.94498
YNL002C	RLP7	968	39.4307	40.7342	523	53.5936	54.5751	45.4454	48.299	48.3421	40.9429	50.6166	49.231	35.8345	34.317	46.2966	42.4873	43.0336	30.5813	44.8221	35.4572	32.1772	39.1857	8.04272	46.3277	7.17572	54.8013	46.1489	49.5289	58.5648	60.5102	47.2208	32.8711	28.8459	28.7575	27.9995	27.9509	26.55	25.602	19.5531	19.7449	30.9536	7.25999	15.7988	2.82566	29.533	4.29978	16.3988	2.43708
YKR095W	MLP1	5627	229.017	40.6997	524	382.798	448.717	303.248	381.121	329.671	270.223	362.339	345.78	304.556	190.663	214.481	271.835	360.382	296.097	361.354	321.162	318.418	355.314	88.4699	222.73	63.0118	290.67	316.009	258.246	147.57	195.148	157.547	155.792	120.586	103.846	91.9818	80.1665	77.6712	102.848	87.1631	75.971	104.865	39.9009	81.0469	22.297	109.267	38.3578	80.4092	26.3392
YBR034C	HMT1	1046	42.4726	40.6048	525	45.0186	51.144	34.7524	45.5199	42.0722	42.4843	57.4812	51.2661	39.4255	31.7962	38.8965	45.7685	44.7038	33.1297	37.1865	38.6508	34.1733	43.1954	10.6797	41.9845	9.1939	55.036	56.1437	39.3517	56.2496	73.9356	47.653	26.3496	22.834	20.382	28.0385	23.2779	26.682	18.0752	16.0367	15.4951	46.232	15.7687	19.6477	4.94918	42.2826	11.1671	21.042	3.77279
YDL140C	RPO21	5201	210.733	40.5178	526	291.363	349.002	257.636	288.069	237.076	259.915	243.158	217.469	186.354	208.022	183.168	190.983	208.782	249.349	188.114	230.103	206.397	235.752	65.6602	208.475	50.7683	221.669	342.785	266.048	196.102	166.667	165.543	100.26	90.4687	74.9437	111.687	78.2799	99.7688	63.6204	58.4462	52.0138	160.671	60.0837	122.725	32.3152	167.088	52.9585	122.346	40.7039
YDR394W	RPT3	1286	51.9887	40.4267	527	67.3881	81.3801	50.7084	66.1236	55.1572	56.6458	74.767	73.1681	55.435	54.426	49.2933	63.6048	63.7644	75.9754	64.1591	70.1774	61.48	73.906	18.8542	64.1461	12.9163	70.0564	69.4702	56.6529	46.303	47.2766	39.8729	22.0019	17.9781	18.6391	21.2236	19.5337	21.273	14.7788	12.9466	13.5018	25.8443	6.79535	19.3178	4.4868	30.2801	8.29023	21.4105	5.48343
YPL117C	IDI1	866	34.9152	40.3178	528	33.0882	36.5621	24.2264	33.6368	25.3523	33.0434	38.2933	44.1916	28.7275	34.317	26.4814	37.5235	32.9138	42.766	30.9392	41.0256	30.2609	41.7373	7.38348	45.9937	7.13088	50.9288	46.6425	39.1821	43.8164	44.3997	41.2777	14.624	11.4459	12.8295	22.1582	17.7051	20.0197	14.669	8.41796	10.4554	23.9097	7.31807	14.2959	2.91128	26.1963	5.66087	14.7405	3.39785
YGR135W	PRE9	776	31.281	40.3106	529	47.0691	50.8224	36.3396	43.6033	36.6201	40.0759	45.7369	43.9009	30.3733	35.0618	36.2667	36.2615	36.4508	45.7923	28.7576	37.9138	30.5005	37.3631	11.0752	44.2118	9.68723	44.8267	40.2261	35.1112	30.783	28.1933	23.9886	16.2709	15.5502	15.7343	14.2139	14.1061	12.8298	12.1417	11.295	8.91343	16.2705	4.99487	9.82387	2.39753	15.8871	5.07313	9.54445	3.28069
YNL085W	MKT1	2492	100.387	40.2837	530	142.512	180.344	136.253	156.588	131.487	125.526	148.624	130.346	115.733	96.4199	89.9634	106.429	120.455	117.228	108.485	112.268	114.576	116.646	31.7094	106.131	27.1332	122.863	137.46	104.74	75.7998	93.786	73.2624	59.6818	54.7437	43.9592	46.5361	31.3758	38.0276	41.8093	36.4423	32.0808	71.3818	28.1978	48.7894	14.0255	69.1761	23.6952	54.1343	15.2318
YLR064W	PER33	821	33.0664	40.2757	531	36.3504	52.3235	30.0742	38.5242	34.0757	32.2727	41.0226	43.5132	27.5305	32.541	29.2947	42.8239	35.2718	46.0312	34.2116	43.4003	37.6864	44.4712	16.7447	44.7686	17.0423	50.2247	39.6091	29.3442	27.3531	30.4948	27.2303	11.5279	11.3881	9.82789	13.0067	8.38817	10.1583	8.29593	8.20484	7.67232	24.5545	10.4544	14.8824	5.48006	19.1243	7.48596	15.588	4.24146
YML012W	ERV25	635	25.5648	40.2596	532	35.1387	38.8137	29.0717	34.5951	27.9875	28.5156	36.8872	32.1746	29.1015	25.3797	25.9921	26.3337	32.3243	32.6519	32.1292	31.0353	36.5686	33.9002	8.37234	38.6436	6.32361	39.0767	33.933	27.7328	27.9533	21.6724	20.2066	13.7677	13.6426	12.4906	10.787	7.3723	9.49865	12.5263	7.99173	7.86036	14.8815	4.79159	9.7139	2.56878	13.9946	4.29978	11.6081	3.16352
YBL041W	PRE7	725	29.1136	40.1567	533	35.0455	44.7108	30.9096	35.2659	29.8958	30.2496	38.9549	37.9893	24.7625	26.9265	28.3773	32.2231	38.7106	45.5534	30.245	42.909	33.2152	44.2889	10.2182	41.205	9.82177	42.0104	35.4137	28.4113	34.2128	26.9467	26.582	12.0549	12.602	11.0866	13.1625	13.6997	13.2256	10.2738	8.89746	6.95774	14.2863	3.57192	8.39427	1.78102	15.4389	3.86671	10.6868	2.60112
YKL210W	UBA1	3074	123.412	40.1471	534	195.174	213.797	171.256	164.83	161.928	167.529	153.421	153.411	129.199	134.346	123.05	122.835	123.599	138.731	118.799	134.131	129.348	134.416	34.8078	138.649	27.6714	136.475	218.405	174.199	111.042	96.471	93.6852	56.1905	53.2985	43.6688	60.6721	45.7721	54.8151	42.084	32.3399	25.5368	71.3322	32.1763	62.7188	21.9887	70.0227	20.3853	64.7106	23.8787
YGL011C	SCL1	758	30.3613	40.0545	535	41.57	51.0368	34.3347	39.5783	36.9835	36.1261	46.0677	45.2576	29.4756	33.1712	29.9062	32.5596	38.5141	40.0583	33.22	38.8146	32.1772	40.097	8.63603	38.8663	8.70057	38.7247	39.4857	31.2948	30.8687	28.0015	19.2341	15.151	15.1456	11.9097	12.7731	11.3197	11.7414	11.9769	9.0573	8.3869	16.2705	4.23984	11.4001	2.77428	19.7219	4.33072	12.5662	2.95262
YDR471W	RPL27B	794	31.764	40.005	536	33.6474	43.1025	30.4919	35.6493	32.8944	34.6811	41.7669	45.2576	28.503	29.5619	32.8418	39.122	34.6823	42.2882	30.3442	35.5391	28.9834	37.3631	5.07614	36.7504	4.03635	42.5971	30.8482	25.4429	36.0992	35.9609	26.4739	13.7018	15.3768	14.0883	13.6298	14.3963	12.9947	13.0208	9.37696	11.1324	29.7631	9.93167	16.0554	3.81892	28.0888	6.46514	17.32	3.74936
YGR124W	ASN2	1718	68.6773	39.9751	537	80.8098	103.682	70.5073	85.6732	75.6027	82.1749	87.0903	73.6527	66.7315	67.9465	74.4292	71.7657	77.4211	90.5493	64.9525	83.9345	62.2784	78.3713	10.8774	79.1804	9.41814	85.781	92.4212	75.9047	83.86	68.949	67.6435	38.141	31.2738	28.0313	52.4943	44.466	50.4286	27.3051	24.9342	26.1385	40.1306	12.342	36.2897	8.9736	43.1292	9.86785	35.5614	9.58429
YOR332W	VMA4	701	27.9999	39.9429	538	29.4532	42.0303	28.4034	27.6953	32.1675	30.635	44.579	45.1607	31.4955	22.9735	26.9095	37.4393	39.3983	33.4483	45.4171	33.8195	41.3593	46.7494	9.49305	38.9777	8.16239	46.0002	40.5962	34.5176	29.1538	26.2754	22.5839	15.6121	14.6831	12.9263	12.4615	10.3909	11.9723	12.0318	11.4015	9.77844	11.5084	6.06935	8.06437	2.84278	10.9068	3.80485	8.03355	3.53845
YER002W	NOP16	695	27.6705	39.8137	539	38.3077	46.5336	29.74	30.3785	38.5283	34.7774	54.9173	44.87	38.4529	25.3224	38.2237	40.6364	43.0336	30.3424	47.6979	32.2636	38.6446	43.0131	8.24049	29.2889	7.17572	37.7859	34.7968	31.8885	29.2395	38.9336	27.1222	20.4209	19.0765	18.978	18.1471	19.3305	17.9089	15.8776	11.5614	13.9907	12.1037	3.51384	7.66115	1.74677	12.3013	3.06244	5.15916	1.24197
YJL189W	RPL39	541	21.5325	39.8013	540	23.1151	24.6606	15.2877	21.6579	24.6254	22.35	44.1654	42.641	28.6527	26.9838	27.888	35.4201	32.2261	25.3251	38.079	31.8542	28.9036	36.9074	5.66946	23.7207	5.15755	30.5103	19.3727	17.8949	12.4332	20.7135	10.6976	11.4621	8.32428	9.8763	10.8649	10.1877	13.4894	7.58171	5.70077	6.46882	17.7586	9.11855	7.91774	2.63728	17.2318	4.85659	8.18095	2.43708
YKL178C	STE3	1412	56.0993	39.7304	541	12.0236	30.665	10.1918	20.5079	11.086	17.6295	14.3083	20.739	10.5484	14.8955	10.5192	19.7713	44.7038	120.892	40.8556	96.0538	47.9065	97.3263	10.0864	63.812	8.74541	62.8982	56.0203	43.0833	40.1293	35.865	33.0654	1.91035	2.02326	2.61432	17.2904	12.7129	15.963	2.08772	1.27868	1.35394	100.103	53.8401	57.9168	25.2254	99.2569	60.8466	64.0473	32.221
YFL004W	VTC2	2486	98.4357	39.596	542	77.2679	94.1393	69.9225	76.6651	72.5132	65.2197	82.376	77.5291	58.9511	60.9571	57.1827	59.9029	70.6419	71.1971	65.9441	61.8249	56.0506	72.3568	44.235	151.122	30.9005	153.256	231.855	186.836	145.597	133.391	119.295	29.8409	28.2679	24.7876	25.8577	21.7105	21.2071	24.1186	17.5818	16.5105	98.4166	29.7369	37.6093	8.4256	99.9044	27.1907	40.4994	8.67038
YDL145C	COP1	3605	142.702	39.5844	543	212.79	263.869	197.487	212.841	184.191	196.622	176.166	158.838	138.101	132.055	132.224	134.024	154.351	172.338	138.83	159.107	153.94	161.299	47.5311	152.124	37.1792	160.766	245.552	178.779	124.761	113.636	112.163	76.6114	73.3577	59.0642	69.2784	55.002	65.765	58.9505	51.6799	42.461	86.6106	33.396	67.1909	19.7282	89.9438	30.1604	70.791	25.1207
YGL195W	GCN1	8018	317.037	39.5406	544	523.632	615.015	485.447	476.761	485.42	459.91	406.421	327.27	346.974	291.036	320.835	287.988	393.787	373.984	352.925	356.374	358.74	351.669	88.404	327.969	70.6809	347.935	470.003	350.943	284.164	287.591	240.534	210.138	172.035	145.918	156.899	126.316	139.643	138.668	117.745	112.979	223.074	92.6375	151.427	43.9432	232.828	83.057	164.319	56.4512
YJL052W	TDH1	998	39.4343	39.5133	545	1.30489	23.2668	1.16955	20.1246	3.27127	26.8778	6.20301	49.7156	14.4385	106.904	2.93558	33.1485	2.5545	39.899	1.88412	31.9361	2.47517	30.255	154.526	116.376	70.7706	53.6278	115.125	76.9224	28.725	29.44	26.69	1.7786	0.809305	1.30716	1.90817	1.42221	1.781	1.26362	0.745895	0.865016	8.08564	8.71199	6.15824	9.35036	11.106	22.5197	12.6768	33.4161
YMR143W	RPS16A	975	38.4723	39.4588	546	40.5447	54.2534	37.5927	39.195	37.4379	44.0257	40.9399	43.4163	30.5229	33.4577	35.6551	40.2157	37.5316	41.89	31.9308	36.6036	29.1431	36.2695	12.3278	47.33	6.99633	44.8267	41.9536	36.0441	54.1917	45.2628	45.5999	20.2892	17.6313	17.7193	16.7841	17.1827	18.0738	17.5808	13.6925	11.6213	36.9062	17.1917	18.7313	6.64458	39.6928	10.8268	22.4423	6.46764
YML007W	YAP1	1952	77.0188	39.4564	547	85.0041	121.48	74.6842	98.323	82.6904	85.932	105.865	113.289	88.5015	82.8994	76.8144	95.0706	84.2004	96.8407	77.4471	94.1704	78.1674	110.358	64.144	80.6281	51.4858	92.0004	95.6294	84.2161	64.9958	64.4419	69.9127	35.3743	27.1695	28.4186	44.9784	33.8429	38.9511	23.0748	25.3604	24.9726	47.2737	23.0287	36.9861	15.1729	47.6613	26.5411	35.4139	21.2776
YDR077W	SED1	1016	40.0497	39.419	548	26.7502	61.1155	20.3836	48.5865	29.8049	47.4938	22.0827	36.7294	25.361	38.3846	15.7176	27.8481	26.0363	44.1995	26.4768	49.7875	41.1197	63.335	27.8199	47.7755	26.909	57.0309	64.411	38.6732	29.411	42.6736	24.6369	11.6597	9.71166	7.93977	16.862	7.4884	11.6095	4.23037	4.79504	6.28077	21.7271	10.8319	25.4028	15.0873	27.4911	21.004	34.0505	33.299
YMR079W	SEC14	1070	41.9473	39.2031	549	60.118	66.0476	39.6812	49.449	48.8873	47.3011	57.4812	54.1735	38.7522	34.0878	39.6915	45.0113	44.6056	53.7562	42.4422	52.6536	47.8266	53.3107	12.7892	56.2392	8.92481	57.8523	53.4291	43.8466	39.7006	46.5094	38.5762	25.0321	21.2153	20.2367	17.9914	14.4253	17.0844	18.0752	14.7048	14.2164	30.3583	9.11855	16.4953	4.36692	30.0311	7.14569	18.0202	3.67906
YDR270W	CCC2	3014	118.024	39.1586	550	78.1068	138.314	78.9447	152.947	86.4161	141.614	136.384	231.909	127.328	222.574	113.815	188.711	48.0443	65.702	44.6238	64.5272	45.3515	67.2535	169.556	206.916	107.187	191.98	189.408	159.527	137.794	103.567	105.571	28.7211	28.9615	22.6574	64.7221	45.3948	60.5209	31.096	19.1802	18.391	42.3628	19.4277	35.6665	15.7038	38.647	20.4472	39.2096	22.4961
YJR063W	RPA12	377	14.7576	39.1448	551	15.4722	23.1596	11.0272	18.7829	14.9025	16.3772	23.4887	18.9946	14.4385	13.3487	13.944	15.9853	17.0955	18.7947	17.8495	17.1963	15.3301	17.2235	1.91179	17.2615	3.04968	24.4083	12.8329	13.7392	16.9778	20.9053	16.1004	11.001	10.4053	9.19852	7.90529	7.16912	6.9261	9.12003	5.70077	5.97989	12.2525	1.85856	4.87528	0.599382	9.56213	2.59843	4.9749	0.656137
YDR214W	AHA1	1052	41.1336	39.1003	552	57.9743	82.774	48.1187	52.6114	38.5283	48.9389	59.7143	50.1032	28.7275	32.9993	46.2966	41.8984	57.6728	69.0468	51.962	63.3808	64.7536	67.8914	19.909	62.1415	27.7611	63.6023	46.1489	36.6378	29.2395	24.6452	21.8275	9.28823	9.07577	6.5842	8.60625	7.16912	8.17939	6.20821	5.91388	6.31838	22.7192	9.64127	15.5056	6.01094	21.0666	6.80541	18.1308	9.02189
YPR103W	PRE2	863	33.7196	39.0725	553	38.6806	57.3628	30.659	43.8908	39.3461	37.6675	48.7143	46.9051	32.6925	35.5774	31.4352	40.7205	41.3633	50.0131	35.0049	46.3482	41.1996	42.5575	13.5803	49.1119	11.6606	53.1584	43.3109	29.1745	24.4377	32.4127	23.3402	15.0193	14.4519	12.9748	14.3308	9.86843	12.0712	10.1089	8.89746	8.8006	16.4193	5.72087	12.5364	2.96266	18.4768	5.01126	14.0771	3.58532
YDR365C	ESF1	1886	73.6815	39.0676	554	89.944	103.36	77.1069	87.494	74.6031	79.1885	110.248	97.396	83.6388	51.5042	77.6706	85.9842	93.8289	69.6043	97.0816	78.2024	82.0798	90.6738	25.6444	66.262	20.8993	93.878	106.241	97.0223	74.9423	91.868	69.3724	63.5684	54.05	48.9458	65.9294	50.2129	63.984	39.282	35.2169	39.9412	59.2781	26.6297	34.5668	11.3369	55.8289	34.1199	32.0973	19.0983
YCL043C	PDI1	1568	61.1767	39.0158	555	61.2365	95.7476	50.2072	69.0944	52.7038	72.3486	56.9023	68.2256	42.9416	64.5091	47.2139	58.3044	46.5706	74.6215	39.3681	74.3537	48.0662	69.6229	25.5126	81.8531	24.3078	83.6688	106.611	71.6642	67.1394	48.0437	39.4407	22.5948	19.8858	18.1066	23.1707	17.0956	22.9551	15.2184	14.8646	11.3956	35.7653	15.3331	29.4349	9.79561	40.0912	12.2188	34.1979	14.107
YOL120C	RPL18A	1007	39.2754	39.0024	556	52.8479	62.6166	37.9269	42.7408	38.1648	54.719	38.9549	37.8924	24.7625	37.5826	42.1378	30.1197	36.4508	43.4828	28.0634	36.9312	26.109	34.5381	7.58125	44.6573	7.44481	38.49	44.1746	41.3871	47.1605	38.2624	37.9279	18.7741	19.2499	17.1867	22.4697	19.6498	22.1305	16.3721	15.2908	11.4333	44.7438	20.5603	21.9571	7.56934	47.0636	12.2497	25.7221	8.01425
YGL173C	XRN1	4586	178.27	38.8726	557	262.189	310.617	244.854	275.036	235.713	221.863	225.955	206.906	191.591	177.371	159.011	170.202	208.782	229.36	200.311	202.262	194.341	221.353	69.9453	200.568	51.1719	202.19	277.757	218.215	148.513	140.199	131.829	84.7798	81.971	67.6333	70.3688	53.4056	64.4787	59.1703	47.8971	42.1225	111.711	45.3023	81.3402	25.0884	121.519	39.6261	89.7694	27.3703
YGL122C	NAB2	1577	61.1358	38.7672	558	67.1085	92.2094	55.8879	79.6358	53.6125	60.5956	85.0226	90.3215	48.4028	52.1916	46.847	73.0277	61.5046	73.2677	57.3168	74.5175	57.9668	80.1028	21.0297	76.7303	17.7151	90.7096	98.961	78.1098	61.9089	57.1538	50.4625	31.4878	27.4586	24.5455	29.713	20.8398	26.2862	23.5143	20.2457	19.4817	32.0449	8.01503	21.2606	4.02442	32.5212	8.04276	22.6635	4.63983
YDL235C	YPD1	503	19.4262	38.6207	559	22.2763	26.8051	22.0544	25.587	22.4445	17.1479	32.5865	31.2055	21.2464	16.6142	20.4879	24.0621	27.117	30.0238	22.4111	23.0103	23.4742	24.8783	5.53761	25.7253	5.24725	31.4491	21.1002	21.8809	19.4644	24.7411	18.1535	12.2526	12.313	9.53741	6.89279	7.89474	6.62927	16.427	9.11057	6.88252	11.0123	3.60096	5.31515	0.92476	10.857	2.8459	5.49082	1.35914
YDL075W	RPL31A	762	29.4199	38.6087	560	34.7659	44.0675	23.4746	31.816	26.4428	31.502	41.3534	38.7646	27.6801	28.3015	31.9245	36.8504	31.9313	35.2003	31.0383	32.3455	29.6222	33.08	8.24049	35.414	5.51634	40.3675	36.5243	30.1923	30.3542	32.125	25.5014	12.3184	12.4286	13.6525	13.5909	14.6865	12.9947	9.99907	8.73763	8.65016	24.0585	12.9228	13.8194	4.40117	22.3614	7.82623	14.8879	5.3897
YLR276C	DBP9	1784	68.8232	38.578	561	106.069	107.22	89.4707	88.1648	93.4129	81.1152	113.556	95.2639	85.8831	56.0301	79.9335	84.2174	94.6149	61.0829	91.8259	68.1303	78.1674	71.6278	11.5367	53.121	10.943	75.5718	85.5112	71.9187	89.262	102.512	88.9307	58.6937	52.1423	42.4584	46.3803	40.954	47.6252	45.71	34.2046	39.3394	53.5239	14.2586	30.5713	5.63419	49.4044	12.5591	27.6752	4.26489
YER012W	PRE1	596	22.9921	38.5774	562	33.2746	41.4942	25.0618	26.8328	26.4428	28.4192	32.2557	33.2406	21.2464	24.0047	20.3044	25.9131	27.4118	32.8112	24.5927	31.4447	23.3145	30.6195	8.04272	34.9685	5.96482	29.1022	30.8482	25.6973	22.3798	16.59	14.3715	9.41998	8.09305	9.39217	9.07356	8.67841	8.67411	8.73545	5.8606	5.26532	13.3438	2.99112	7.14796	1.71252	14.144	3.74298	7.77559	2.06215
YPL212C	PUS1	1634	62.9943	38.5522	563	81.835	98.6426	71.7603	84.3316	78.6014	72.9266	97.3459	86.9296	73.8386	66.858	77.5483	85.1429	77.3229	61.959	74.6705	68.4578	69.7039	72.3568	13.0529	56.0165	11.4812	77.684	83.0434	72.8516	63.5381	72.593	61.1601	40.0514	38.4998	33.2115	46.3803	37.8483	42.612	28.0194	28.6637	27.9438	41.1723	9.84455	28.8851	6.06232	37.9995	9.55851	29.6283	5.5303
YKL184W	SPE1	1400	53.9704	38.5503	564	56.6694	77.3058	61.4015	73.4068	49.7051	60.5956	69.0602	70.067	48.1783	59.0092	49.2322	61.4173	54.7253	60.0476	48.2929	53.9638	48.146	58.3229	12.6574	70.828	10.0909	66.4187	72.9251	61.7415	54.3632	55.6195	47.9772	25.2956	24.2791	22.7542	33.9577	28.4443	31.926	19.2839	15.9302	18.2782	35.0212	11.9064	25.6594	5.48006	38.9956	9.06357	27.8595	5.3194
YMR230W	RPS10B	727	28.0057	38.5223	565	32.2493	36.026	25.9808	31.9118	32.8036	24.2768	37.0527	39.1522	30.7474	22.687	27.093	38.6172	34.5841	35.7578	35.8974	34.8021	29.8617	39.5502	6.3287	27.3957	4.30543	36.7298	28.257	25.1885	26.7529	28.3851	20.7469	14.0312	11.6193	12.2001	11.4101	12.4516	12.401	11.5374	8.68435	8.49972	29.3662	13.2713	15.6889	4.19567	27.6405	6.86728	15.4775	4.40549
YDL029W	ARP2	1298	49.9376	38.4727	566	59.1859	68.0848	50.6249	63.2487	48.0695	55.008	60.4587	68.6133	44.5874	48.124	47.8255	48.7132	51.0901	67.2948	42.8389	54.7007	47.9863	57.5938	28.4132	78.1781	21.3029	72.1687	80.2053	65.4731	45.8743	44.3038	47.9772	19.8281	18.9609	17.7193	18.8091	13.4385	16.1939	17.1413	13.1064	11.5461	25.1002	9.90263	18.4014	6.30207	26.3457	8.90891	22.8846	7.38154
YLR447C	VMA6	1037	39.8308	38.4096	567	60.584	61.1155	48.2022	57.403	54.612	47.8792	53.7594	47.2928	42.4179	40.6763	38.9576	40.2157	49.3216	51.5263	39.5665	42.0901	42.2376	42.5575	15.4262	54.1233	12.3781	55.7401	52.9355	44.6947	40.7295	37.3034	35.9829	21.8702	19.2499	19.7526	18.0692	14.9187	15.0395	21.3167	18.6474	14.3668	27.0348	10.164	17.5217	5.22318	24.6524	7.70249	17.2832	6.06927
YNL024C-A	KSH1	218	8.37124	38.4002	568	11.744	13.2953	10.3589	8.52899	11.8129	13.1017	13.2331	9.20659	10.3987	11.4008	11.3142	11.1897	10.611	11.5476	10.8089	8.27062	8.78286	9.93311	1.77995	13.141	1.61454	11.7347	8.14393	7.8873	12.0902	8.53471	9.29288	6.3239	6.24321	7.60088	4.71202	4.46982	4.81529	7.80147	4.9016	3.91138	4.61328	0.871199	1.35628	0.393879	4.58186	0.711475	2.21107	0.187468
YJR117W	STE24	1361	51.9004	38.134	569	68.1337	100.894	63.4064	82.4149	59.9733	75.1423	71.2106	57.3716	34.4879	46.8636	56.7546	52.4992	69.1681	74.5419	55.3335	66.902	70.1032	69.8963	15.3603	63.5893	15.069	61.3727	63.9175	48.6808	36.6137	32.7963	28.3109	19.3011	15.0878	13.8946	20.5615	11.1455	15.8641	10.988	13.3728	8.27407	36.5094	10.5996	25.806	7.34671	35.9078	10.1463	28.3754	8.13141
YPL249C-A	RPL36B	540	20.5881	38.126	570	22.1831	31.63	19.1305	20.5079	19.355	23.2171	30.6015	29.8487	20.2738	19.4215	23.9739	28.7736	22.9905	25.4844	19.2378	24.0749	22.2765	27.2477	4.6806	23.2752	3.9915	24.8777	23.9382	24.4252	20.9221	22.2478	15.7763	8.1025	9.94289	8.18184	9.34616	10.6231	12.6319	6.31809	6.34011	5.67902	13.443	8.33447	9.1274	3.63054	15.14	5.599	9.39704	4.49923
YKL057C	NUP120	3113	118.643	38.1123	571	151.553	187.957	153.211	173.838	146.208	156.932	145.15	140.134	127.179	125.008	98.4643	124.349	132.638	132.837	122.368	129.382	130.705	128.037	43.1142	125.397	27.3574	122.863	172.503	138.749	110.013	105.965	92.3885	67.455	58.9058	47.7355	50.8197	37.9644	47.7901	44.8859	40.9709	35.8794	92.6128	28.8076	59.1265	13.8029	89.6948	25.2728	66.5163	14.5991
YLR257W	YLR257W	965	36.7427	38.0754	572	35.8844	48.4635	29.8236	37.8534	38.8918	39.2089	33.3309	35.1789	39.1262	40.8481	28.5608	35.7567	40.9703	85.0542	35.1041	63.3808	38.3252	71.9011	13.5144	43.8777	8.74541	39.1941	54.2928	53.1757	25.3809	24.837	26.1497	21.0138	17.1688	15.5407	15.3822	15.5283	15.7651	16.8666	13.1597	11.5085	14.1871	5.28527	15.0291	5.15468	14.891	5.90834	15.2932	10.2639
YOR039W	CKB2	776	29.5388	38.0654	573	37.2825	49.4285	35.003	40.345	35.3479	33.9104	41.1053	39.2491	30.2237	27.4422	25.9921	31.7183	33.6998	40.1379	33.7158	34.884	30.1811	34.2647	7.77902	45.6596	5.91997	40.0155	36.0307	29.0897	30.5257	29.1523	23.2322	13.7677	13.7004	11.7644	10.5923	8.85256	11.0158	12.6911	10.2294	8.19885	19.2468	4.90775	10.7403	2.2434	20.0207	4.05232	12.1609	2.41365
YDR346C	SVF1	1445	54.9918	38.0566	574	66.5492	84.1679	62.4039	66.2195	58.065	60.4029	71.2933	72.9743	53.3403	52.4781	51.7396	63.8572	60.0309	58.6938	54.1436	56.666	50.4615	61.0567	17.2061	62.2529	13.8133	66.4187	67.9894	59.706	63.7953	61.2773	55.8653	34.4521	33.5861	28.1765	32.5947	25.3096	28.8587	28.7885	20.6719	21.3997	40.0314	14.6942	25.9526	7.03845	39.9916	11.3217	27.8226	4.8273
YPL043W	NOP4	2057	78.2336	38.0329	575	110.077	119.551	88.2176	95.6397	88.1426	81.5969	131.008	107.378	102.716	67.0299	95.0395	94.4817	102.18	65.3038	105.213	78.1205	91.5812	88.3044	16.7447	70.4939	11.9745	97.6331	94.3955	94.3932	88.6618	122.938	92.4965	63.5025	53.7031	52.1895	54.675	42.6664	50.5275	39.337	30.7415	35.8041	57.2939	15.5654	34.4935	6.64458	55.2313	13.085	32.2079	6.163
YOR360C	PDE2	1580	60.0827	38.027	576	83.8856	75.6975	72.5122	76.6651	79.3283	63.3893	75.3459	67.5473	71.8187	57.3478	52.9016	62.4269	66.1224	68.4097	67.2332	65.1004	69.7838	65.7043	24.7874	65.3711	18.1636	70.9952	86.6218	70.5617	60.7942	74.3191	66.4549	48.6809	39.7137	34.8575	48.9894	39.2415	45.3165	36.6449	37.348	33.7356	49.8532	21.6929	27.7854	8.80235	48.4581	15.6834	31.4709	7.87365
YGL029W	CGR1	362	13.7622	38.0171	577	17.7092	20.1574	13.0321	14.4705	18.3555	14.7395	24.812	23.3557	17.5058	11.4581	16.7573	19.7713	20.3378	11.5476	22.5102	14.6578	15.5696	19.4106	4.02136	14.5888	1.97332	21.8266	16.2879	17.386	13.4622	28.6728	16.8568	13.8335	12.6598	12.2486	9.81347	6.99498	7.22293	8.79039	4.36881	9.43996	6.10143	0.755039	3.59231	0.46238	4.93048	0.742409	3.02179	0.421803
YFR040W	SAP155	3008	114.352	38.0161	578	166.28	192.782	138.675	163.872	140.937	143.926	146.474	141.781	116.107	104.326	102.868	123.171	147.179	144.226	137.64	141.829	148.191	162.21	36.8515	110.919	27.0884	124.036	185.336	148.926	82.5738	96.5669	83.0956	66.9938	52.2002	41.6354	55.6096	37.5871	49.2742	43.1828	31.7005	36.3307	69.3976	24.1322	55.4975	12.6555	68.0804	25.3038	54.3186	17.3408
YNL248C	RPA49	1247	47.3634	37.9819	579	65.4308	70.3365	59.2294	55.3905	53.976	52.2143	69.5564	58.3407	52.0685	40.2752	52.2901	55.1073	60.5221	46.1905	48.6895	51.4252	46.2298	46.8405	8.63603	41.205	7.8036	52.689	54.1694	54.4478	64.224	62.8117	54.7848	32.0148	29.3084	23.8677	30.6087	27.5445	33.3112	24.0087	20.0326	19.9706	42.6108	11.2675	21.4072	4.58955	41.2865	10.0535	21.9264	4.03056
YDL007W	RPT2	1313	49.8604	37.9744	580	71.3959	89.4217	55.3031	63.2487	59.6098	58.3798	71.2933	71.7145	52.5922	51.2177	53.024	53.5088	60.1291	69.5246	58.011	59.614	60.5219	69.5318	17.6017	65.2598	13.589	70.1738	66.0152	58.4339	41.0725	42.1941	41.1696	23.2535	17.4579	19.6074	20.7563	18.4307	20.6794	18.1302	14.7581	11.9974	23.4136	7.46327	20.051	3.99017	25.2998	7.30035	18.8309	4.78043
YML024W	RPS17A	808	30.6792	37.9693	581	35.2319	40.1004	28.654	34.116	31.0771	32.4653	36.97	36.9233	25.8098	30.1921	30.3344	35.4201	34.7806	40.1379	31.3358	34.3927	29.0633	36.1784	6.3287	32.1844	4.79877	39.1941	34.1798	29.3442	35.156	37.0157	27.4464	14.7558	12.7755	11.4255	10.5534	13.4385	13.7533	11.7571	7.88517	8.98865	30.7552	18.2952	11.1801	3.54492	30.8279	8.6305	12.8979	4.05399
YOL027C	MDM38	1721	65.2426	37.9097	582	98.519	112.581	79.2789	89.9856	97.3203	81.9822	121.166	93.035	87.0801	62.6185	69.3531	81.7776	94.8114	69.445	91.0326	75.3364	88.3875	81.1963	18.3928	65.8166	15.8314	85.8984	99.8248	89.5591	59.851	73.8397	49.2739	57.6397	49.7144	40.6671	43.888	35.4393	42.1173	36.2054	26.9055	37.3461	30.9536	8.39255	24.8163	4.96631	33.7663	8.3521	24.2481	6.35047
YBL024W	NCL1	2054	77.8089	37.8816	583	111.941	131.988	93.9818	106.66	99.592	91.3268	110.579	93.035	78.1776	65.6549	80.6674	80.3473	97.6607	83.1429	87.8593	80.7409	84.0759	85.7528	19.8431	74.9485	14.4411	97.3984	108.092	88.5414	84.4602	86.6897	64.5099	56.2564	48.3271	38.1496	38.8255	32.4207	34.9603	36.3153	32.3399	31.8552	57.9884	19.8053	37.9025	8.61397	60.2116	15.405	40.9785	10.5919
YER103W	SSA4	1928	73.0227	37.8749	584	167.398	142.388	107.014	105.127	65.698	48.5535	132	78.2075	18.4783	24.1193	76.1417	52.5833	281.88	202.203	239.977	216.838	286.321	227.368	24.5896	84.7486	46.2386	127.557	36.8944	26.291	26.6671	20.3299	18.5858	9.74935	6.9369	6.68103	5.17933	4.03445	4.51845	7.47183	5.59421	5.71663	24.6042	3.9204	23.24	6.19932	27.5409	7.05288	36.2247	11.084
YIL126W	STH1	4079	154.22	37.8082	585	253.894	311.367	213.36	243.795	226.535	197.104	234.474	189.074	190.768	144.028	149.776	161.704	239.534	197.106	234.92	200.46	221.408	223.267	24.9852	152.681	19.509	181.654	254.806	187.345	97.0649	132.048	97.251	96.176	83.3584	69.3762	57.9072	45.685	55.2109	56.9178	47.4709	46.3724	82.543	18.4694	57.7335	8.68247	81.0789	16.9207	63.863	11.2949
YPL050C	MNN9	1187	44.853	37.7868	586	69.9047	66.5837	52.1286	54.8155	58.1559	52.118	71.4587	63.5739	54.3877	43.0252	53.4521	47.7877	55.5113	59.968	55.9285	50.6883	54.0545	59.0519	16.3491	56.2392	10.5393	57.9697	67.7427	56.144	44.4166	40.0844	35.2265	27.1401	24.6838	20.382	24.4168	17.8212	20.3825	18.0752	15.7703	14.9309	29.4158	9.11855	16.6786	4.17855	29.3338	8.22836	18.9783	5.6006
YOR259C	RPT4	1313	49.6096	37.7834	587	59.4656	77.1986	48.0352	59.2238	48.7056	53.9483	66	71.9083	51.6197	43.7699	46.2354	56.5376	62.9784	58.2956	53.9452	66.8201	54.3739	71.5366	15.4921	64.0347	12.4678	67.3575	72.8018	59.7909	45.7886	43.153	36.7393	21.409	20.9841	17.0415	25.4683	18.4598	22.7572	15.9875	11.881	12.712	28.3245	8.68295	20.3075	4.86356	28.288	8.81611	19.7522	6.20987
YDR174W	HMO1	740	27.954	37.7757	588	36.4436	43.7458	36.5903	36.6076	40.7091	35.6444	54.0076	41.8657	35.0864	32.7129	37.0617	32.7279	45.4898	34.8021	38.674	31.3629	45.6709	40.1881	8.30641	29.9571	7.66906	39.3114	33.1927	26.1214	22.0368	26.5631	21.9355	17.3907	15.2034	13.6525	13.7466	12.2194	13.3245	11.3176	9.96302	10.9819	16.7169	6.33071	12.3165	2.89416	18.2776	4.73286	13.3401	3.09322
YMR188C	MRPS17	713	26.9318	37.7726	589	43.9001	43.9603	34.4182	36.1284	39.9822	28.9972	46.9775	42.9318	35.6101	32.8275	37.3064	37.2711	37.2368	34.7225	35.8974	33.0006	38.9639	37.8187	10.3501	36.3049	8.02784	33.5614	38.6219	35.4505	20.6649	27.5221	22.1516	15.6121	16.1861	13.0716	13.4351	10.5941	13.5883	12.8559	10.0163	9.70322	9.87142	2.49744	7.22128	1.47277	11.2554	3.24804	7.73874	2.10901
YOL145C	CTR9	3233	122.005	37.7375	590	168.144	212.51	148.784	172.688	158.566	147.009	180.218	168.335	142.44	104.269	109.779	140.587	171.741	148.128	166.893	148.38	148.51	170.412	29.9954	128.181	22.1999	147.858	172.997	150.961	94.0638	115.458	96.0624	71.078	62.3743	52.8189	53.1952	40.3735	50.4946	47.0286	40.7578	38.0231	72.87	24.7421	51.502	11.7136	73.2599	24.0046	50.007	14.107
YDR299W	BFR2	1604	60.4957	37.7155	591	89.3847	86.9556	73.9324	72.736	88.506	57.3201	114.88	91.0967	84.8358	47.4938	78.4657	90.9481	90.1937	46.1108	92.5201	64.3634	79.6046	74.9995	13.6463	38.8663	9.77692	67.7095	83.5369	76.668	63.7953	93.1147	63.6454	56.1905	45.7835	42.41	45.3678	38.9223	42.678	34.8319	23.7088	33.4724	48.7123	16.2043	26.3925	6.83295	41.5853	13.3943	25.2799	6.0224
YGR020C	VMA7	356	13.412	37.6743	592	12.0236	17.7986	9.85765	12.1706	10.359	16.3772	23.3233	22.968	13.2416	13.2914	12.5374	17.9204	18.6675	20.8654	14.478	18.3428	16.4479	21.5066	3.36212	18.7093	2.95999	21.1225	15.1773	15.0113	11.7473	13.4254	7.56397	5.46754	6.41663	5.03498	4.51731	4.87617	5.24405	4.66989	4.74176	4.28747	5.95262	2.20704	4.50872	1.06176	7.42061	1.97976	3.72197	1.14824
YPR072W	NOT5	1682	63.3476	37.6621	593	87.4274	115.155	83.1217	91.2314	85.6891	79.0921	105.617	100.206	87.7534	63.3633	61.5861	78.4964	93.5342	82.4261	93.8092	82.4606	97.6494	87.302	23.0734	62.8097	17.3114	76.5106	91.5575	66.5756	44.8454	51.4001	38.5762	36.9553	31.8519	28.0313	27.2986	20.5205	23.4498	26.7008	19.5531	20.798	35.0212	11.616	26.0626	6.43907	35.4596	11.9095	27.233	7.35811
YDR212W	TCP1	1679	63.1842	37.6321	594	85.2837	102.395	69.2542	83.5649	66.3341	74.179	85.0226	71.8114	55.1358	54.4833	61.6472	54.6866	74.1789	81.8686	68.0265	67.3114	64.9133	73.6326	16.8765	80.7395	14.8448	84.2555	87.9791	64.4554	62.5949	60.8937	49.0577	36.8894	32.6034	27.9344	29.9466	17.1246	23.6807	26.8107	20.3523	20.5723	51.2421	13.6778	32.2575	6.76445	50.0518	13.3943	31.9131	8.69382
YKL054C	DEF1	2216	83.3085	37.5941	595	104.484	120.408	89.053	105.606	95.412	76.9727	171.12	142.169	137.952	76.4828	88.6179	128.64	163.587	115.476	162.431	123.896	158.491	161.846	46.9378	68.2666	33.8605	89.5361	100.689	82.3502	56.3354	65.5926	56.2975	31.1584	30.5223	23.2868	40.2664	27.0801	35.9168	19.8333	16.4097	21.0989	48.9603	24.6549	42.4479	18.8377	46.4162	22.7981	37.9198	17.7157
YLR292C	SEC72	581	21.8367	37.5847	596	32.8086	32.2733	22.9733	24.437	26.5336	26.7815	42.2632	34.4036	28.9519	26.3536	24.8301	29.5308	33.4051	29.7849	30.9392	27.6779	28.185	30.1639	8.96565	29.8458	6.95148	34.0308	28.7505	19.5062	23.7517	21.4806	17.3971	12.7796	12.0818	12.5874	10.4365	9.66526	9.53163	10.2738	8.41796	8.23646	9.57379	3.89136	5.13187	1.86665	9.81115	3.15524	6.63321	1.89811
YPL179W	PPQ1	1649	61.9691	37.5798	597	80.1573	93.1744	70.5073	80.69	73.0584	71.5779	82.376	75.1064	69.0506	63.3633	55.5314	69.2417	72.8034	67.6929	66.8366	69.6042	68.9055	60.0543	24.3259	69.9371	16.6387	67.8268	95.8762	73.9541	64.6528	51.5919	53.38	33.7934	28.8459	25.8043	37.4236	21.7105	27.2427	25.1075	20.3523	18.8799	48.2658	16.4657	34.4568	9.35036	47.1632	14.446	33.8293	9.44369
YMR217W	GUA1	1577	59.2188	37.5516	598	61.9821	78.1635	50.3743	59.5113	44.4348	62.5223	71.5414	65.609	46.6073	48.3532	60.8522	61.1649	53.1533	45.633	47.7971	51.589	45.0321	54.222	12.7233	56.2392	11.6606	69.0003	70.3339	63.2681	92.0059	78.6344	73.4786	37.2188	29.9443	26.5789	56.6611	40.0542	47.6911	29.8873	21.1514	21.5126	63.6434	24.1903	31.9642	10.3265	58.3191	18.8696	33.4608	9.67802
YIL035C	CKA1	1118	41.931	37.5053	599	64.3123	69.2643	59.5636	62.9612	58.7011	48.3608	63.6843	58.2438	47.7295	44.5147	46.3577	46.0209	61.6029	51.0484	60.1926	51.0977	52.8568	51.4881	15.7558	50.3369	11.9296	54.9186	57.0075	48.596	35.6705	39.6049	34.254	27.6012	26.7071	22.7058	19.3933	18.721	18.2387	21.0969	14.8113	15.4575	23.3144	7.63751	16.6419	4.52105	25.6982	7.39315	17.0252	4.17116
YDR381W	YRA1	1446	54.2145	37.4927	600	60.7704	96.7126	56.8068	73.7901	55.9751	79.5738	49.9549	69.6793	46.8317	69.608	42.6271	67.8956	38.0228	66.7373	39.0706	69.031	41.1996	65.8866	41.2684	54.9028	33.8605	60.6686	76.7503	65.4731	38.7574	35.1937	31.6606	23.517	20.6951	22.7058	23.0928	17.0666	23.12	19.1191	13.8523	15.0061	34.3764	22.6221	25.8793	14.7277	35.4098	28.7993	24.8377	20.2231
YHR128W	FUR1	650	24.2991	37.3832	601	18.548	31.8444	14.6194	19.0704	15.7203	22.35	17.0376	21.0298	13.6904	16.3851	11.3754	17.4997	15.6218	23.812	10.908	20.5537	12.6952	22.509	11.6026	42.8754	8.47632	42.8318	39.4857	33.5847	42.3587	35.7691	29.7156	13.3724	12.602	11.716	14.4087	13.7868	13.8852	12.6911	9.85647	7.5971	18.4035	7.14383	9.31068	2.53453	18.0286	6.99102	9.32334	2.74172
YMR146C	TIF34	1043	38.9376	37.3323	602	46.7895	63.9032	36.6738	41.1116	35.6205	46.9158	54.7519	49.0372	39.5003	32.4264	39.8138	44.843	43.7213	40.2176	39.0706	41.435	39.2035	48.7543	6.85609	45.9937	6.00967	49.638	59.7221	45.6276	41.4155	42.4818	32.5251	19.5646	21.1575	16.8962	17.0178	17.2988	17.8759	16.7017	12.4138	11.6213	29.9119	7.84079	16.6786	3.01403	28.4872	5.81554	17.6517	3.21039
YPL190C	NAB3	2408	89.8244	37.3025	603	116.321	144.104	91.9769	128.414	109.406	86.6064	139.609	125.5	103.913	78.2588	83.5418	96.9216	128.413	107.911	126.236	120.211	120.724	130.589	44.8283	105.574	32.1562	129.786	142.519	108.556	65.4245	88.224	61.1601	59.0231	47.0553	37.7139	42.4471	26.964	36.1806	30.6565	26.053	31.9304	48.0674	18.5565	41.2749	12.2445	46.466	17.9725	42.8947	14.2944
YJL014W	CCT3	1604	59.8067	37.286	604	97.5869	107.649	76.1044	82.2233	68.6058	75.1423	83.9474	78.1106	63.4398	57.5197	71.0044	61.838	72.7051	73.4269	63.1675	68.1303	67.1489	70.8987	18.0632	70.0484	15.7417	68.5309	78.4778	73.8693	63.8811	53.2221	47.7611	37.0212	30.7536	27.9344	30.5697	25.6579	29.3864	31.1509	22.5367	20.3843	37.2535	11.8193	26.7957	5.49719	38.1489	10.3319	26.7539	6.0927
YKR052C	MRS4	914	34.0788	37.2854	605	43.4341	59.4	43.0228	59.4154	50.1595	58.6688	82.2933	60.8604	73.5393	63.7643	70.3317	55.9486	37.9246	32.2537	30.7409	29.6432	32.9756	32.351	22.0845	35.3026	15.6969	38.3726	38.6219	30.6163	29.2395	20.9053	22.4758	12.2526	14.8565	11.6192	20.7563	20.3754	23.1859	12.0868	10.336	10.6058	13.2446	7.63751	14.2593	5.97669	16.5345	8.97077	14.0403	11.4121
YML103C	NUP188	4967	185.022	37.2502	606	287.262	313.941	271.67	298.035	244.437	233.808	224.053	208.553	187.925	170.898	158.583	176.512	233.639	211.919	205.666	211.679	195.379	197.933	51.091	180.856	42.9198	192.098	277.634	216.943	156.401	189.106	155.818	119.364	99.6601	77.8969	81.4673	62.4614	78.6937	80.8166	63.3478	64.1992	143.458	48.7581	90.6142	20.1735	132.077	41.544	96.2183	22.1446
YPR143W	RRP15	752	27.9849	37.214	607	29.4532	36.991	25.8137	30.4744	31.6223	20.327	46.7294	43.9009	28.8023	19.8225	29.1723	37.9441	41.2651	25.2455	42.4422	29.7251	33.5345	34.9026	6.3287	27.5071	4.39513	39.1941	63.5473	55.6352	25.3809	45.7422	24.3128	23.3194	20.2904	16.4121	27.3375	22.5813	26.8139	14.0097	9.80319	11.7717	13.8894	2.84592	6.34153	1.42139	12.6499	3.27897	5.78563	1.24197
YMR246W	FAA4	2084	77.4397	37.1592	608	31.9697	76.2336	26.482	67.8486	25.5341	64.2563	54.173	113.096	40.0239	95.7324	42.0155	97.7629	25.8398	45.2348	23.2044	43.5641	19.7215	49.6656	31.1161	91.5418	26.2811	100.684	129.316	130.098	105.382	76.2371	68.2918	28.7869	25.4353	21.8828	31.8938	26.2965	35.488	21.2618	18.7539	19.068	70.4393	52.7075	47.1766	25.4994	72.5128	54.8764	46.7641	35.3845
YNL197C	WHI3	1985	73.575	37.0655	609	90.3168	117.942	86.6304	111.452	90.4143	85.1613	97.4286	93.4226	82.0678	71.3267	61.953	89.2654	83.0214	81.4705	79.2321	85.0809	92.6991	95.7771	23.2052	66.4848	17.8945	73.2248	134.251	95.6654	49.8186	59.9348	49.7061	36.0331	32.0832	25.5138	33.1399	23.8003	29.2215	24.3933	21.5777	17.9773	51.4405	16.1753	39.0755	9.21335	48.6075	14.477	40.1309	10.6622
YKL035W	UGP1	1499	55.5078	37.0299	610	61.7025	94.5682	55.6372	74.0776	67.1519	71.0962	60.1279	56.6932	43.8393	48.5823	33.5146	45.6844	55.7078	109.503	53.3503	81.4779	71.9396	94.7746	43.0483	95.6623	28.972	74.281	91.1873	63.0984	31.3832	26.9467	24.3128	21.0138	21.2732	17.2351	15.9664	10.9423	13.9182	18.2401	13.9056	9.92888	24.753	9.11855	21.7005	9.86411	24.7022	13.1159	28.6702	23.2694
YPL202C	AFT2	1250	46.2636	37.0109	611	48.2808	55.8617	37.175	51.3656	39.6187	40.8466	66.3309	71.8114	46.0836	43.3689	40.3643	70.083	41.9528	45.5534	41.2522	48.1498	46.0701	55.3156	24.3259	40.9822	25.6084	55.6227	69.3468	56.7377	51.4478	55.9072	54.7848	21.4749	16.5329	14.0883	27.8827	22.3781	25.7915	16.8666	15.7703	15.7207	31.8961	11.3546	19.941	5.99382	28.039	11.1361	21.9264	6.18644
YOR089C	VPS21	632	23.3543	36.9531	612	31.0377	38.7065	23.6416	26.0661	27.8967	26.1071	34.7369	32.4653	27.0816	24.7495	27.4599	28.8577	29.1803	26.9975	30.6417	26.7772	33.7741	32.9889	8.37234	32.2958	6.99633	34.8522	30.7248	29.3442	28.1248	21.1929	20.963	11.9891	11.5037	10.7962	11.6827	10.1877	11.8403	11.1528	7.35239	8.27407	9.72261	3.45576	8.24765	1.9694	10.359	2.96964	8.62317	2.20275
YOL077C	BRX1	875	32.2963	36.91	613	41.57	45.1397	34.0005	32.1035	37.6196	34.3921	53.7594	46.3237	36.1338	23.3745	36.7559	36.1773	39.7913	30.8202	38.079	34.2289	34.2531	33.809	6.59239	29.8458	6.05452	40.3675	37.6348	34.2631	51.0191	51.6878	38.2521	26.9425	24.915	24.4487	17.2515	17.56	16.5897	25.1075	19.34	15.3446	27.3324	7.66655	12.0232	2.91128	25.7978	6.77448	13.5612	2.39021
YBR286W	APE3	1613	59.4957	36.8851	614	69.5318	90.2794	61.1508	75.4193	61.5181	73.0229	73.8572	64.543	59.2504	54.5978	50.5165	60.7442	63.3714	76.931	53.4494	72.2246	62.997	72.9947	29.2043	88.2009	21.8411	86.9545	110.066	76.1591	48.8754	51.496	35.8748	43.4768	34.5111	28.0313	26.7144	20.8979	25.5606	25.2174	21.4178	24.1076	33.3347	16.9303	27.8221	12.6726	32.5212	14.7244	26.6065	15.5364
YJL130C	URA2	6644	244.705	36.831	615	204.96	337.744	191.89	271.682	184.736	275.715	199.241	209.813	159.647	206.647	153.262	193.338	160.344	217.016	134.665	194.237	143.719	196.019	120.311	282.978	111.358	354.859	577.972	458.651	276.361	295.55	247.126	152.037	129.547	99.6345	224.619	180.592	205.013	106.144	94.9418	107.977	146.583	79.0468	107.586	47.3512	163.353	77.3033	113.28	57.6463
YGR103W	NOP7	1817	66.905	36.8217	616	84.538	90.8155	68.2517	68.9986	61.3363	64.449	92.4662	85.379	73.5393	49.3271	72.4722	76.3089	75.1614	51.4466	75.9597	60.6785	55.1723	62.6971	12.5915	57.2415	10.9878	80.5004	95.2592	78.2794	92.3489	98.7725	79.2056	51.9746	44.3383	36.8909	48.639	38.4288	47.2954	33.1837	22.217	30.5764	61.7584	23.958	33.2838	7.89471	58.0202	15.2194	31.0655	4.92103
YER126C	NSA2	785	28.8719	36.7796	617	41.1039	32.9166	27.8186	30.2827	32.3492	28.4192	50.2858	41.9627	36.059	25.6089	39.4469	37.6076	37.6298	26.9975	39.4673	27.1866	33.7741	34.2647	6.065	23.1639	4.97816	38.2553	29.6143	33.2454	43.1304	47.5643	39.6568	24.1758	19.5389	19.7526	24.6505	20.9269	24.7361	15.9875	15.9835	14.1035	25.5963	5.98223	10.7769	2.22628	20.0207	6.09394	9.61815	2.57768
YDR450W	RPS18A	875	32.067	36.648	618	46.0439	48.0347	30.659	33.6368	35.1662	41.1356	38.6241	39.8306	25.5106	30.8223	38.8353	33.4851	29.2785	40.8547	28.0634	34.3927	25.5501	35.3582	5.07614	34.189	5.2024	36.4951	32.3289	29.6834	39.2718	33.1799	33.3895	14.0312	14.3941	16.1216	14.7591	15.9636	15.7321	11.867	7.35239	8.98865	29.5151	15.2169	15.139	4.58955	31.0769	7.67156	18.9783	5.20223
YMR183C	SSO2	887	32.4911	36.6303	619	36.3504	48.3563	28.8211	39.0034	33.167	33.3324	52.3534	57.3716	40.0988	29.3327	32.8418	47.6194	45.9811	43.642	43.8305	42.5814	46.9484	52.0349	9.69082	38.9777	9.14905	46.3523	44.5448	35.2808	29.3253	30.8784	21.5033	15.8756	16.5907	12.6843	14.4087	10.1006	11.0158	12.2516	8.52451	9.51518	13.7406	5.66279	10.7769	2.77428	14.6918	4.45445	12.0135	4.03056
YKR014C	YPT52	704	25.7839	36.6249	620	48.7468	49.2141	39.4306	41.5908	45.7069	39.2089	45.1579	33.8221	38.9018	27.8432	32.0468	27.3433	46.2758	35.1207	35.7982	32.673	33.3749	37.5453	9.88859	35.1913	7.31027	31.2144	33.8096	25.867	23.1515	20.5217	23.9886	21.3432	18.1515	17.4772	13.5909	10.7972	10.4881	16.7017	11.6679	11.6213	9.07774	2.84592	6.96468	1.78102	9.61194	3.15524	8.69687	2.06215
YHR196W	UTP9	1727	63.1168	36.5471	621	105.323	89.8505	89.5542	75.8026	82.6904	68.0134	96.0226	79.5643	72.492	53.6239	83.7253	80.9362	82.2354	58.6938	76.753	58.7951	71.3008	61.3301	16.1514	33.4094	13.903	58.3217	75.0228	69.2895	61.0514	81.5113	78.8814	48.0221	44.454	35.971	39.7601	39.1254	39.4128	36.59	35.8562	31.3662	72.1755	21.8381	37.0594	8.47697	61.9049	20.1997	37.0354	8.69382
YGR229C	SMI1	1517	55.3664	36.4973	622	55.8305	84.1679	50.0401	64.8778	57.8833	52.5033	74.3534	73.362	59.2504	47.8949	50.6388	67.8956	69.4629	76.4532	68.6215	80.3315	67.1489	89.7625	9.29527	59.5802	5.91997	69.235	76.7503	63.3529	50.6761	57.2497	37.1715	24.5051	21.0997	16.6542	30.1803	26.3255	29.4524	19.174	13.7458	14.3668	35.0708	6.65015	22.9834	3.54492	31.8738	5.75367	23.8427	3.11665
YOL049W	GSH2	1475	53.7338	36.4297	623	77.0815	88.5639	59.1459	73.0235	71.241	64.16	79.6467	76.9477	61.9436	62.6185	60.6687	63.1841	59.9326	71.1971	61.1842	65.1004	58.2064	65.8866	17.1402	68.2666	10.2254	70.2911	77.2439	64.625	49.8186	43.3448	41.2777	27.3377	26.0134	25.5622	26.6366	22.9006	22.7572	25.9866	20.1924	18.0525	27.2332	9.03143	19.3178	4.60668	27.79	7.45502	19.6048	5.6006
YML074C	FPR3	1235	44.9793	36.4205	624	47.5352	73.3386	39.0129	57.4988	53.4307	46.3378	65.173	64.2523	45.2607	34.6035	44.2172	46.694	62.0941	45.8719	63.5642	50.3607	50.6212	60.4188	11.0752	53.4551	10.1357	71.934	70.8275	51.4795	44.8454	59.9348	39.5488	34.0568	24.6838	26.0947	22.3529	17.1537	20.0857	14.0646	9.96302	16.7362	23.5128	7.49231	16.422	5.01768	23.8555	8.13556	17.6148	6.77227
YIL118W	RHO3	695	25.2775	36.3705	625	29.826	33.7744	24.7277	31.1452	28.8962	27.4559	37.8797	34.3066	28.7275	26.4682	27.7657	28.5212	30.8506	33.4483	26.9726	31.1172	30.4206	35.9961	6.59239	36.0822	5.51634	36.0257	29.4909	34.772	30.5257	28.8646	24.2047	14.6899	13.3535	12.6359	11.4101	10.9133	11.5435	12.2516	12.5204	8.61255	11.6076	3.13632	6.63478	0.976136	13.1977	2.87683	6.96487	1.40601
YMR131C	RRB1	1535	55.76	36.3257	626	71.862	83.0957	57.308	59.9904	51.5225	61.9443	86.8422	72.3928	61.6443	44.1137	60.1794	69.2417	57.4763	47.0665	53.9452	50.9339	48.4654	58.9608	11.0752	49.8914	8.79026	75.2197	71.6912	59.5364	88.1473	79.6893	58.8909	37.3505	33.2971	29.9194	46.575	36.1068	45.3824	32.3047	21.9506	23.7315	45.984	12.6614	21.5539	4.65805	42.1332	9.80598	25.1325	3.51502
YNL061W	NOP2	1856	67.3941	36.3115	627	89.3847	104.432	76.0209	80.69	80.6005	69.9402	95.9399	84.3129	73.9882	49.499	68.3746	76.2248	80.6634	57.977	78.7363	70.5869	64.1947	66.7068	12.2618	61.5847	12.1539	83.6688	92.9148	76.1591	83.0882	104.526	76.0719	57.9691	51.5643	43.1362	50.7419	38.7771	45.7123	34.1177	28.1309	34.0741	50.0516	14.8685	29.6549	6.78158	52.5419	15.0647	29.0756	6.65511
YBR177C	EHT1	1355	49.1858	36.2995	628	47.2555	94.8899	43.9417	78.1025	46.0704	94.2169	61.6166	63.6708	48.8516	64.7383	47.2751	56.7058	22.6958	44.1995	19.1387	33.0825	21.7975	31.8042	26.2377	80.9622	16.9078	58.7911	101.059	77.6009	51.1906	45.071	32.9573	9.81522	10.2319	10.2152	10.3976	9.17184	8.872	9.44967	7.8319	6.31838	13.939	4.58831	11.2535	4.17855	13.9448	4.70192	13.7455	5.0382
YJL002C	OST1	1430	51.8276	36.243	629	72.2348	94.5682	56.6397	72.736	63.6989	60.1139	74.6843	68.8071	54.7617	53.2802	51.9231	57.2106	66.7119	67.6929	60.5892	66.5744	61.4001	63.335	21.2934	64.1461	14.9345	63.2503	67.6193	50.6314	45.2741	41.9064	37.0635	26.4155	27.921	21.0598	22.3529	14.077	18.6015	22.7451	17.2089	13.6146	34.3268	11.4998	22.8735	6.13082	35.609	9.43478	24.4323	7.73305
YDR377W	ATP17	305	11.0442	36.2105	630	15.2858	15.4397	15.2042	14.0872	13.2668	16.8589	13.3158	11.8232	14.0645	11.63	10.825	9.25466	14.6393	18.4762	14.6763	12.1193	13.4937	13.3049	3.82359	17.8184	3.18423	14.0817	9.87142	8.98983	13.2049	8.9183	14.0474	8.16837	7.11032	6.14848	4.3226	3.77322	4.35355	7.74653	6.97945	4.09942	7.83761	2.6136	3.55565	1.31864	8.66568	2.6603	5.23286	1.52318
YFL037W	TUB2	1373	49.7089	36.2046	631	61.6093	85.1328	50.7084	68.4236	51.5225	65.9904	58.0602	55.7241	39.5751	40.5617	41.3428	48.1242	56.8868	66.3391	46.7063	61.5793	55.2521	62.1503	14.1736	66.1507	10.4496	67.9442	70.4573	56.9921	53.1628	46.893	39.3326	26.4813	22.834	19.7526	16.901	13.0031	16.6886	20.2179	16.7826	11.6213	29.1678	8.85719	21.1873	5.03481	26.7939	7.76436	21.6316	6.84257
YPL171C	OYE3	1202	43.4174	36.1209	632	17.8956	79.6646	11.612	54.7197	13.9029	64.738	40.3609	82.6655	14.4385	80.8369	26.4202	63.3524	11.8883	59.7291	10.0156	57.403	17.6456	50.3946	29.2702	69.0462	29.0168	67.5921	43.8044	39.7758	32.5836	25.5082	22.8	10.2763	8.26647	9.15011	8.83991	7.45937	6.53032	8.79039	8.57779	7.89797	9.27616	4.58831	10.447	5.22318	10.1598	6.52701	11.9398	10.4982
YGL238W	CSE1	2882	104.022	36.0937	633	142.233	156.434	129.403	151.509	134.667	119.168	127.12	113.871	105.858	92.7533	86.5997	98.7725	128.904	129.333	115.625	118.327	119.287	127.399	37.7744	113.035	29.3308	124.388	145.357	104.146	82.488	96.9505	81.1506	55.6635	51.1596	42.2164	45.9909	32.6529	41.3257	43.2377	32.7661	35.2024	85.8169	31.6536	58.9065	14.4708	87.8023	25.2419	67.2902	15.8645
YPL178W	CBC2	626	22.5928	36.0907	634	32.3426	37.2054	25.0618	28.1744	25.8976	27.5522	40.0301	29.7518	26.0343	22.7443	20.916	26.5861	31.9313	32.0944	27.8651	29.3976	32.7361	33.1711	6.46054	30.5139	6.63755	32.3879	29.9845	24.4252	20.0647	22.4396	18.8019	13.4383	12.602	12.297	9.22933	7.45937	8.11343	8.57063	6.44666	7.25861	12.3517	2.81688	6.52481	1.11314	12.0025	2.53656	6.74376	1.61691
YDL148C	NOP14	2432	87.6148	36.0258	635	128.718	134.347	101.584	110.781	99.6829	96.6253	150.526	120.364	108.252	56.8322	94.061	108.195	122.027	70.7192	117.807	81.9692	87.8286	97.3263	17.9972	67.8211	13.9927	99.1586	116.853	106.436	99.723	137.418	104.815	84.7139	69.658	54.1744	67.5649	45.685	58.7729	51.3139	41.3439	47.3878	66.4709	22.0123	41.8247	8.18584	61.7554	16.9207	39.2096	6.95974
YIL038C	NOT3	2510	90.2229	35.9454	636	133.378	157.078	122.636	131.193	118.856	115.507	137.707	114.065	106.007	87.8836	92.2262	101.549	117.704	106.796	109.279	103.096	114.656	114.276	31.3139	89.6486	23.4556	97.6331	131.66	113.391	77.086	81.3195	79.2056	57.8374	46.5928	45.5569	43.9269	32.8851	38.4893	44.1168	35.5366	32.3441	57.2443	19.1664	44.1341	10.4977	48.8565	15.6525	41.826	11.7402
YJL008C	CCT8	1706	61.3091	35.9373	637	80.437	101.752	64.8266	78.5817	68.6967	70.8072	79.3158	78.2075	57.6045	51.275	62.9315	63.4365	66.2206	75.5772	61.7792	69.768	56.2901	68.985	21.689	78.2894	16.6836	81.6738	76.5035	63.0984	72.7987	63.7706	53.7042	36.4942	35.7828	27.5471	29.9466	21.5074	25.4946	27.2502	23.8686	19.7449	42.2636	13.3584	27.8587	6.74733	44.1751	12.9922	28.0069	7.21751
YOR043W	WHI2	1460	52.4097	35.8971	638	59.5588	83.2029	55.3866	69.9569	57.1564	62.8113	62.8572	66.772	48.0287	53.7958	55.4703	59.3981	45.2933	55.986	41.2522	50.9339	43.7546	57.047	23.7326	57.7983	18.1187	62.7809	78.6012	71.4098	54.7062	53.6057	48.7336	27.4036	20.6373	18.6875	28.9341	25.0484	26.2862	19.1191	16.9957	15.4199	32.1441	8.82815	24.7063	5.77119	33.0192	8.50677	25.7958	6.74884
YHR094C	HXT1	1712	61.4455	35.8911	639	11.9304	80.2007	10.693	69.3819	10.9042	56.2604	18.3609	62.411	8.7529	36.4941	22.5673	83.6285	15.0323	49.6149	13.3871	44.3011	18.1246	48.8454	39.884	55.3483	44.6689	80.2657	73.0485	63.9465	110.87	78.3468	108.273	10.3422	8.26647	7.84295	21.3404	15.9056	21.372	7.63665	8.57779	6.95774	39.0889	36.0386	51.7952	42.7959	30.8279	44.8229	51.6285	64.817
YGR185C	TYS1	1184	42.4819	35.88	640	53.5936	68.8354	51.878	53.953	52.1586	50.9619	60.6241	57.8561	43.4653	36.0357	45.0123	46.105	51.6796	52.9598	46.9046	54.8645	51.4196	55.1333	13.4485	48.2209	10.7187	59.4952	56.2671	44.6099	42.0157	39.7967	32.6331	22.7265	18.8452	18.6875	21.8466	18.6629	19.3271	16.3721	14.5982	13.577	28.9694	9.14759	21.004	5.32594	27.6903	9.15638	19.7522	6.56137
YDR190C	RVB1	1391	49.8847	35.8625	641	66.7356	75.5902	49.0376	62.0029	58.7011	60.9809	76.9174	65.8029	56.1083	43.9418	54.8587	56.4534	67.3014	57.8974	61.4817	53.4724	62.2784	64.8842	15.4262	57.4642	11.0327	68.2962	70.8275	61.063	52.734	52.5508	40.8454	31.2901	29.3662	27.3051	26.1303	19.9981	23.3508	24.0637	16.6761	18.0525	33.5827	9.23471	20.1243	4.4868	32.2224	9.43478	20.1576	5.29596
YML022W	APT1	563	20.1756	35.8359	642	28.0551	32.4877	25.1454	22.5204	27.9875	31.1166	32.0902	24.8093	24.164	19.9371	27.6434	22.4636	20.1413	23.0156	18.0479	18.5884	20.5199	18.9549	5.33984	25.5025	5.2921	22.8828	18.1387	15.605	27.3531	23.2068	22.3677	15.8756	17.111	13.5557	14.9928	12.4807	17.678	13.5152	14.9179	10.9819	21.3302	7.08575	8.57756	1.72964	16.1361	4.29978	9.655	1.64034
YJL177W	RPL17B	871	31.1941	35.8141	643	40.2651	44.818	30.5754	36.7034	38.0739	36.2225	38.5414	41.3812	32.5428	24.5203	26.6649	42.3191	36.6473	41.0936	34.6083	39.8791	33.5345	41.7373	5.86723	32.4071	4.43998	39.3114	29.2441	28.4961	33.7841	34.7142	26.2578	14.6899	15.6658	13.3136	13.0067	13.7578	15.5342	17.0314	9.27041	9.5904	27.0348	10.3963	14.8091	4.0758	24.9014	7.33129	15.0721	4.8273
YHR141C	RPL42B	761	27.2288	35.7803	644	27.589	34.5249	15.7054	26.7369	26.5336	28.4192	39.5339	38.9584	25.8846	28.7025	25.7475	36.6821	27.51	34.2447	28.3609	37.1769	25.0711	38.5478	5.40576	29.9571	5.69573	32.0359	28.6271	23.2379	28.8108	28.9605	24.9611	11.7914	12.7176	10.1668	9.85241	11.6099	13.2915	10.5485	7.45895	6.73208	24.7034	12.1677	11.6933	2.75716	24.6026	7.02195	11.9398	3.30412
YBR084C-A	RPL19A	1075	38.4529	35.7702	645	41.57	58.5422	35.003	44.8491	45.616	47.1085	46.5639	54.658	34.6375	37.9263	38.2237	45.1796	45.4898	43.8013	40.0623	45.6112	39.7624	46.3849	7.7131	35.8595	7.17572	44.8267	44.0512	38.8429	35.2418	40.3721	34.1459	16.5344	17.7469	18.155	17.0178	17.7922	18.8654	15.548	12.6802	13.0881	33.2354	13.7649	19.7944	5.56569	30.7283	8.78517	20.8946	6.4442
YBL022C	PIM1	3401	121.642	35.7665	646	163.39	217.335	128.567	175.276	143.027	149.803	169.632	173.471	129.722	118.992	102.623	142.269	134.603	156.729	131.789	157.06	128.709	168.407	41.598	139.651	35.6095	143.399	189.161	136.544	99.2086	93.3065	85.2567	59.4842	48.6161	43.1362	55.9601	35.4393	50.6924	34.8319	30.5817	31.9304	59.7742	19.9505	48.4229	11.7308	66.9847	20.0141	52.5866	15.1615
YDR508C	GNP1	1991	71.2091	35.7655	647	34.7659	71.3014	28.7376	64.207	29.2597	69.3622	40.8572	70.8423	44.5126	74.8214	31.374	60.2394	41.2651	67.5337	37.9798	66.0012	36.5686	74.635	62.364	107.244	45.6107	97.7504	115.125	97.3616	68.4256	74.2232	53.9203	18.313	17.3422	16.9446	42.1356	27.5736	37.1041	13.5152	12.5737	14.4796	66.5205	39.6105	45.7103	24.8315	71.218	47.9782	50.265	39.6729
YGR017W	YGR017W	893	31.923	35.748	648	37.2825	46.4264	33.8335	38.5242	35.8022	32.8507	52.8497	45.7422	39.201	29.6765	29.2335	40.6364	39.8896	42.5271	44.5247	41.3531	37.926	45.2002	6.92201	39.6459	4.30543	52.337	39.7325	36.553	29.411	37.5911	29.2834	16.0733	19.6545	13.5073	15.0707	13.2934	15.3364	16.5919	13.9056	12.0726	15.576	3.83328	13.3062	1.64402	14.0942	2.96964	11.0922	2.06215
YFR010W	UBP6	1499	53.5469	35.7217	649	71.2095	94.1393	68.0846	79.2525	71.6045	65.316	76.0076	74.7187	58.9511	49.9	54.5529	54.4342	65.8276	77.7274	62.4733	65.7555	64.1148	72.1745	20.7001	69.7143	16.0108	69.5871	74.6526	58.858	43.9021	42.4818	46.6805	32.5417	27.5742	23.3836	21.4183	18.0244	18.7664	22.855	19.5531	16.2849	26.2411	8.42159	20.894	4.46968	28.5868	8.66144	20.9314	5.92867
YDR264C	AKR1	2294	81.9278	35.7139	650	92.2741	118.371	85.4608	116.627	87.0521	105.488	106.526	126.179	85.7335	106.102	88.7402	103.82	61.6029	69.8432	58.1101	63.217	59.404	62.9705	31.8413	122.835	22.0654	120.046	120.925	90.3224	89.5192	78.4427	66.9952	44.3332	47.749	37.5203	60.8279	44.7853	56.6621	39.7216	35.803	30.9901	48.4642	17.1045	32.1108	9.05923	51.0479	12.7447	36.4826	7.77991
YFL038C	YPT1	620	22.14	35.7096	651	24.1404	31.8444	19.2976	22.5204	23.8076	26.8778	33.9098	27.8136	22.5181	19.7079	20.4268	28.2688	29.082	29.2274	26.1793	28.1692	27.7059	33.5356	7.31756	34.7458	4.30543	36.0257	30.8482	26.291	23.8375	22.056	19.2341	10.8692	11.9661	9.92472	9.19039	8.38817	9.82846	8.73545	6.65978	6.54403	10.9131	2.904	5.90165	1.86665	10.3092	2.4747	6.74376	1.87468
YGL077C	HNM1	1691	60.3639	35.6972	652	66.8288	99.1787	61.9027	92.2856	74.4214	105.392	88.8271	84.7975	85.2098	103.982	64.7051	71.8498	33.8963	37.9877	31.8317	30.4621	33.6144	31.5308	36.5219	95.2169	15.6072	65.2452	129.192	100.245	55.7351	55.4277	45.3838	20.4209	20.5217	18.2034	17.7577	8.85256	15.6002	20.6025	13.3728	8.68777	26.4395	10.5125	16.6786	5.83969	26.8935	10.3009	17.9465	6.11614
YHL011C	PRS3	962	34.3335	35.6898	653	47.8148	48.7852	37.4256	35.3618	38.8918	39.6906	43.0076	38.1831	36.3582	28.6453	37.9791	34.8312	39.4966	34.8818	31.1375	36.1123	35.2113	34.9026	6.59239	34.4117	6.63755	42.4798	41.2132	39.9454	50.8476	43.8243	42.8985	22.3972	21.2732	19.5105	23.5212	21.8266	21.8007	22.7451	19.0736	14.3292	30.7552	8.21831	14.9924	3.37366	29.9813	7.70249	14.7773	3.65562
YPL273W	SAM4	977	34.8264	35.6463	654	44.4594	54.1462	38.094	42.07	40.6183	38.1492	61.9474	50.8785	45.1111	45.7751	46.5412	48.7132	54.0376	49.376	45.913	47.6584	44.4732	49.4833	10.8774	33.5208	8.16239	42.8318	43.4343	31.5492	31.2117	31.9333	27.1222	17.6542	15.8392	14.6208	21.8466	18.8081	19.2941	13.1306	12.6802	10.6435	21.8263	6.65015	12.6097	3.56204	20.6184	5.90834	15.5512	5.43657
YKL063C	YKL063C	503	17.8967	35.58	655	23.5812	29.3783	19.7153	26.5453	21.1724	15.7992	34.7369	29.6549	22.967	15.4684	18.5309	26.2496	30.4576	27.3957	32.4266	25.5488	25.63	28.888	6.13092	19.0434	3.76726	23.4695	20.6066	18.3189	13.1192	17.5489	16.2085	10.7375	10.2319	7.21358	6.50337	5.45666	6.53032	8.51569	5.80732	5.79185	9.17695	1.7424	5.46178	0.92476	8.76529	1.57762	6.44895	1.03107
YBR130C	SHE3	1277	45.2692	35.4496	656	57.3218	75.3758	44.8607	62.482	59.3372	49.6132	69.5564	67.7411	47.505	39.1294	39.3857	59.9029	61.9959	57.2603	61.68	54.6189	57.9668	63.0616	15.9536	51.4505	12.423	58.6737	63.3005	53.0909	39.8721	44.2079	39.3326	24.3734	23.7011	19.3169	18.0692	14.4253	15.8641	19.1191	15.5572	14.3668	24.0089	8.27639	16.8985	4.19567	22.0128	7.79529	16.5093	5.27253
YGR132C	PHB1	863	30.5668	35.4192	657	44.739	59.2928	39.8483	43.9866	42.2539	41.6173	52.1053	44.1916	37.5552	36.3795	35.1047	35.5043	40.3808	45.9516	35.2032	35.7029	38.7244	39.8236	12.7892	43.2095	9.55268	39.0767	36.2775	28.1568	34.1271	21.9601	24.2047	19.1693	18.6718	16.751	11.8385	12.1324	12.434	18.8444	13.5859	10.7563	12.7485	4.67543	7.80777	2.34615	12.3511	4.14512	10.4657	2.24961
YHR170W	NMD3	1556	55.0358	35.3701	658	71.2095	72.8025	54.9689	58.0738	49.796	56.6458	83.6166	73.1681	59.4748	43.6554	60.1183	69.9989	67.8909	44.3588	65.3491	57.5668	51.1801	60.0543	10.416	46.2164	8.07269	67.4748	63.7941	64.2858	83.9457	82.758	72.9383	40.9736	32.3144	33.8409	39.5265	32.8851	38.6212	29.228	25.2006	23.9948	47.3233	12.6905	22.397	5.03481	40.4399	9.21824	21.9633	2.34335
YBR049C	REB1	2432	85.955	35.3434	659	117.906	137.456	98.1588	116.339	107.316	99.5154	139.775	112.999	97.5537	73.962	80.8508	98.9408	144.428	117.467	131.392	116.034	142.362	129.768	25.2489	88.6464	21.6169	111.597	126.724	99.7362	75.5426	73.2643	62.7809	43.4768	35.2048	30.6456	29.2846	22.0008	25.5936	30.217	21.5244	21.5878	43.8013	15.6235	34.4568	9.1791	50.4502	13.085	39.8361	11.6464
YDR395W	SXM1	2834	100.149	35.3386	660	133.285	147.428	121.299	133.685	108.134	109.342	129.436	114.743	96.5063	87.1961	96.9965	102.39	103.556	97.7964	96.6849	103.833	91.0223	104.252	25.117	97.2214	19.509	125.796	144.616	119.158	104.696	106.54	96.1705	63.3708	50.5237	48.9942	60.3995	46.4106	58.2452	45.765	40.6513	38.7753	86.3129	26.9201	50.8422	10.8916	86.4576	22.396	55.461	9.65459
YGR090W	UTP22	3713	131.211	35.3384	661	201.046	213.797	173.261	191.759	173.923	174.465	177.241	144.883	140.57	113.607	117.118	133.604	146.098	126.148	134.268	127.335	131.024	138.061	32.4346	115.819	21.7963	134.011	173.367	151.301	127.333	141.158	125.778	86.0973	75.381	57.4665	60.0101	51.2868	59.9272	57.4122	47.7906	48.4409	117.812	32.6119	68.7671	13.7515	117.684	27.1289	73.8497	14.5522
YOR078W	BUD21	644	22.7547	35.3333	662	28.9871	33.131	21.7202	24.9161	28.9871	24.9511	37.4662	36.148	26.7076	16.6715	26.6649	32.1389	30.3593	24.2898	33.4183	28.9062	30.0214	32.2598	4.35098	19.4888	3.45332	32.0359	27.7634	27.2239	23.666	33.8512	28.9592	14.097	13.1801	14.524	13.474	11.9292	17.0514	14.614	12.1474	9.70322	13.0958	2.52648	7.9544	1.28439	10.5084	2.7531	6.78061	1.26541
YER136W	GDI1	1355	47.8656	35.3252	663	59.7452	75.6975	50.7084	66.5069	56.0659	60.4992	67.0752	64.0585	55.8839	54.0822	44.7065	56.6217	60.1291	67.9319	55.631	57.8125	58.0467	63.1527	14.3714	64.4802	10.2254	61.9595	64.6578	54.363	35.4133	36.0568	28.4189	24.4392	25.2041	20.7693	23.2875	15.5573	19.4261	17.6357	17.1023	13.6898	26.7372	8.47967	20.9674	4.88068	29.1844	8.5377	21.8527	4.99133
YDL180W	YDL180W	1643	58.021	35.314	664	56.949	89.3144	51.1261	82.7983	47.2517	73.1193	64.3459	71.5206	35.9093	60.6134	59.1398	77.9074	50.7953	65.0649	42.1447	67.1476	50.7809	74.5439	19.7772	52.2301	22.7829	63.9544	79.5884	73.0212	51.3621	40.3721	50.0303	16.9296	14.2784	12.4422	41.0842	29.3441	37.4009	11.9769	13.6392	11.1324	39.4361	15.3912	31.3044	10.7717	36.2066	12.5281	31.2866	15.3724
YPR169W	JIP5	1478	52.1311	35.2714	665	72.7008	71.6231	60.399	69.4777	64.6985	53.563	67.6542	63.2832	54.0884	48.3532	55.2868	58.1361	61.7994	57.8974	59.2009	58.9589	61.4001	59.5075	13.7781	48.3323	11.3018	56.3268	84.2773	68.2718	56.0781	55.0441	44.1952	34.518	30.2333	26.5305	41.0842	29.0248	35.6859	25.4372	18.8072	25.9129	43.4045	13.8811	24.4864	5.99382	38.7466	10.4247	25.243	5.55373
YLR033W	RSC58	1508	53.1272	35.2303	666	87.8934	96.2837	66.9986	76.4734	81.6909	64.738	84.361	74.8156	68.4522	51.676	56.3876	63.2682	85.9689	69.3654	80.2237	63.954	77.4488	75.4552	14.8329	55.9051	11.2569	63.0156	68.2362	56.4833	40.2151	50.4411	45.708	36.3624	31.8519	28.0797	22.6255	17.4439	19.9208	26.536	18.2211	21.8887	30.656	9.72839	20.8207	4.91493	30.6785	8.84704	21.3368	5.3897
YPR043W	RPL43A	681	23.976	35.207	667	27.4958	34.8466	16.7914	23.287	22.2628	26.0108	31.4286	29.3642	21.6952	24.6349	22.8731	27.8481	21.222	32.413	22.0144	27.1866	25.9493	26.7921	8.37234	28.9548	6.09937	32.9746	27.2698	22.4746	25.0379	25.7959	19.4502	8.95886	12.8333	11.3287	10.5923	10.507	10.9498	7.36195	7.29911	6.76969	21.6278	10.3963	11.0702	3.76754	21.7638	6.06301	12.7505	4.28833
YOL041C	NOP12	1379	48.44	35.1269	668	67.0153	77.1986	56.0549	62.482	67.061	49.4205	85.8497	65.3183	60.0733	35.6347	57.6108	59.2298	76.3404	47.9425	70.4065	52.5717	60.6815	57.4116	16.3491	44.5459	12.1539	62.4289	56.7607	46.2213	54.7062	81.4154	52.6236	38.8657	34.8579	32.4853	27.5712	21.8557	25.1648	30.2719	23.0695	22.9793	36.0133	10.3963	20.6008	5.24031	32.9694	10.3937	20.305	5.50687
YIL018W	RPL2B	1164	40.8708	35.1124	669	46.4167	61.8661	40.8508	49.3531	46.5247	57.0311	44.579	47.4866	31.1214	36.6086	43.361	39.4585	35.8613	47.0665	25.7827	41.8444	34.333	42.4663	7.05386	38.3095	5.91997	48.2298	49.8507	40.115	52.3053	42.3859	35.1184	16.732	19.0187	13.943	19.7438	19.4176	20.2836	16.3172	13.9589	10.4554	38.4936	19.2245	19.3545	6.98708	41.7347	10.7031	22.2581	6.70197
YMR194W	RPL36A	765	26.8297	35.0715	670	34.2999	42.0303	26.8161	32.8701	34.1666	27.7449	39.5339	41.8657	25.1365	26.812	26.8483	34.3264	29.6715	34.9614	31.0383	32.3455	28.5044	31.8042	8.10864	35.7481	6.54785	36.8471	30.9716	24.9341	30.5257	25.7959	21.0711	14.2947	15.1456	13.4105	12.0721	12.1324	12.7638	13.6251	9.32369	9.5904	17.3618	7.86983	10.667	3.06541	17.4808	5.2278	11.8292	3.21039
YKR028W	SAP190	3101	108.506	34.9907	671	161.713	194.283	142.017	159.943	144.754	147.78	137.624	137.614	129.049	115.44	98.8313	117.955	133.718	128.378	121.079	122.422	127.591	130.953	34.2145	107.467	22.6035	114.062	171.393	137.392	81.6306	89.183	81.6909	56.7834	46.5928	44.8307	49.8851	33.8139	39.3798	41.0401	28.0776	30.1251	65.4292	21.809	50.9521	12.8953	67.1341	18.5293	51.002	14.0601
YDR032C	PST2	596	20.832	34.953	672	12.4896	22.409	14.7865	19.4538	14.8116	20.5196	28.0376	43.5132	14.4385	40.2752	19.5705	43.0763	14.2463	19.3522	10.5114	21.8639	14.1324	22.1445	25.9081	39.8686	24.4872	35.791	25.2955	23.7467	19.8074	15.631	14.5877	7.24614	6.30102	6.72944	5.6077	4.96324	5.70579	6.42797	6.07372	5.86707	5.30775	2.20704	5.13187	2.00365	5.27909	2.81497	6.3384	4.59296
YPL118W	MRP51	1034	36.0996	34.9125	673	59.7452	60.0433	47.7845	47.724	50.9773	49.5169	52.5188	43.2225	43.0164	38.7284	42.1378	39.3744	50.6971	48.3407	48.5904	43.0727	49.1041	43.1042	10.3501	51.2278	10.2254	48.6992	51.7016	46.3061	37.8999	30.303	30.6881	21.936	20.2326	18.2034	14.5255	14.1641	15.2704	18.7895	14.2253	12.2607	16.5681	4.18176	12.2065	2.46603	19.1741	5.28966	12.1977	3.72592
YDL083C	RPS16B	863	30.1286	34.9115	674	34.4863	40.8509	25.7301	33.7326	30.8045	31.213	30.7669	34.5974	22.4433	23.8901	25.7475	33.4009	32.2261	37.3506	27.0718	35.1297	26.109	32.4421	4.35098	31.6276	4.79877	35.4389	32.8225	30.4467	38.6716	35.3855	28.4189	13.7677	14.2784	12.8295	12.4226	12.0453	12.1372	11.7022	8.68435	8.72538	30.5072	11.8773	15.5789	3.76754	30.1307	8.29023	17.0621	4.28833
YBR146W	MRPS9	836	29.1779	34.9018	675	39.6126	48.1419	31.4108	36.0326	39.0735	33.6214	47.6391	41.1874	34.7872	28.0723	32.4137	36.5139	43.7213	39.023	40.3598	36.5218	40.0818	43.7421	11.5367	36.0822	8.29693	40.4849	39.8559	32.5669	27.0101	29.5359	21.6113	17.5884	18.2094	14.5724	13.8635	9.43306	12.3021	11.7022	12.4671	11.1324	15.3776	4.44312	9.86052	2.3804	14.3432	4.05232	10.9079	2.57768
YKL028W	TFA1	1448	50.5158	34.8866	676	61.8889	79.2357	57.8928	68.6152	66.1524	60.4029	82.7068	75.9786	58.8015	50.874	53.5744	71.5974	65.8276	53.2783	65.2499	56.4204	63.2366	64.793	18.0632	50.8937	13.3648	63.6023	78.6012	66.7453	43.9879	48.9068	39.3326	32.3441	29.3662	21.6891	25.0789	18.1985	20.7123	22.0858	18.967	18.6543	26.5388	9.20567	19.4278	5.12043	26.2959	9.09451	21.8159	6.98317
YDR028C	REG1	3044	106.185	34.8834	677	164.043	196.106	147.865	155.63	142.573	131.306	170.624	155.834	140.196	105.701	109.656	126.957	155.432	136.501	150.63	142.975	153.54	153.371	29.5339	103.012	22.1102	118.286	172.75	139.936	71.5125	84.7718	64.0776	58.8913	51.6221	43.0878	49.7294	36.6583	41.2927	40.7105	30.0489	34.4502	47.9682	15.9139	41.8247	9.69286	52.3427	15.405	42.4157	11.7636
YKL006W	RPL14A	814	28.3774	34.8617	678	32.995	42.4592	24.2264	28.7494	29.9866	33.236	35.6466	36.6325	25.2862	26.8692	30.5178	35.336	29.6715	34.4039	29.6501	32.0179	24.7517	32.7155	5.93315	32.4071	5.74058	32.6226	27.7634	24.0012	36.0135	33.9471	27.5545	13.1748	13.4113	13.8946	12.1889	10.5941	14.4129	14.5591	8.84418	9.25191	28.0765	14.549	11.8033	3.87029	24.752	7.39315	13.3401	4.03056
YKL179C	COY1	2039	70.9802	34.8113	679	117.067	124.697	99.6625	111.356	111.95	88.1477	120.338	101.466	98.601	69.2642	76.9367	88.6765	110.335	96.0443	113.345	91.7957	96.8509	97.9642	22.0845	72.4985	16.3248	88.128	108.832	88.9654	50.8476	59.3594	52.4075	47.6928	40.5808	35.8742	32.6337	25.5128	28.7268	32.4695	28.344	27.1164	31.0032	10.4544	25.3661	6.37057	33.0192	10.8268	26.2749	7.61588
YGR054W	YGR054W	1928	67.1032	34.8046	680	84.6312	111.295	79.6966	93.6272	72.7858	75.2387	85.5189	76.6569	64.8612	57.2905	65.8671	68.4845	77.0281	71.7545	60.5892	75.5001	77.2093	75.9108	15.7558	68.6007	13.589	81.7912	98.5909	86.6755	69.1116	69.9079	58.6748	33.9251	36.3609	26.7725	35.4765	30.2438	32.3548	25.2174	22.9629	22.0391	49.4067	11.8773	32.734	6.3877	49.9024	10.3937	35.3402	6.25674
YJL080C	SCP160	3668	127.415	34.737	681	177.185	217.657	152.543	177.192	150.388	168.878	166.572	142.847	125.608	105.529	116.139	134.361	151.993	151.314	136.152	154.603	132.382	153.918	24.7874	122.167	20.6751	143.399	191.629	151.47	111.899	115.842	94.3335	66.8621	54.339	45.1212	57.2842	43.7984	52.3415	48.3471	36.8685	30.426	91.0254	30.3758	64.1484	16.7142	96.7668	24.252	69.9435	18.1141
YOR290C	SNF2	5111	177.458	34.7207	682	245.505	341.711	224.637	290.656	246.436	237.469	257.549	247.512	217.7	178.689	161.763	207.725	230.2	217.493	228.871	214.545	226.198	246.505	58.4086	172.615	42.3368	195.032	298.487	220.42	120.302	138.761	105.463	98.0864	83.7052	71.5064	70.5246	46.9911	65.5671	63.7303	44.434	49.1931	87.8507	27.646	69.2436	17.2964	90.0932	29.5108	72.3388	20.7152
YER056C	FCY2	1601	55.578	34.7145	683	28.7075	45.9975	22.8063	34.7868	25.0797	47.3011	25.5564	37.1171	36.7323	52.65	26.9095	42.9921	20.6325	41.4918	23.1052	40.2886	17.3262	40.826	36.6537	52.4528	23.7696	58.7911	76.8737	76.2439	93.8923	73.1684	70.2369	25.0321	21.909	20.0431	61.3342	47.3975	58.3771	20.6574	20.8851	20.7604	63.7426	38.478	39.772	22.1429	79.6844	53.5462	53.1025	34.2363
YPL079W	RPL21B	903	31.2509	34.6079	684	32.995	41.387	26.5655	35.0743	33.0762	31.6947	38.376	41.1874	24.3884	26.812	29.1112	37.1028	33.6016	38.7841	26.8735	35.7848	29.702	38.73	7.77902	29.5117	6.32361	41.6584	35.0436	32.991	38.4144	32.2209	26.1497	13.1089	13.3535	13.2652	12.0332	13.6707	12.5	12.5263	8.89746	8.87582	28.771	11.4998	16.0554	4.67518	28.1386	8.1665	18.2045	4.52266
YPL265W	DIP5	1826	63.0958	34.5541	685	15.1926	37.956	12.7815	31.7202	20.8089	41.0393	23.4887	57.1777	76.7562	118.706	17.7358	38.7855	10.0215	24.688	10.908	21.4545	10.5394	22.9646	222.559	199.9	122.122	146.332	164.729	154.269	82.2308	63.5788	62.6729	10.8033	10.1163	8.90804	73.1337	46.2365	71.8995	10.4386	7.61878	9.47757	26.2907	25.7294	14.9191	17.4848	30.0809	41.7914	17.0989	38.1731
YDL025C	RTK1	1862	64.2811	34.5226	686	71.4892	113.868	65.4949	100.048	67.6971	84.198	90.564	94.6825	58.4275	85.191	61.4638	83.3761	58.4588	73.9844	50.8712	69.6042	64.3544	73.9971	31.5776	80.4054	28.8374	76.2759	93.6551	88.6262	50.7619	42.8654	42.3582	21.936	17.2266	17.0415	35.3596	21.8847	29.6503	16.8666	17.1556	15.7207	23.8601	8.47967	26.869	10.0696	31.0769	13.7036	28.2648	19.4966
YGL009C	LEU1	2339	80.7467	34.5219	687	115.11	75.5902	99.0777	49.8323	103.318	70.7109	62.1955	33.6283	58.6519	27.9578	58.8951	39.4585	73.0981	78.2053	72.5881	64.6091	65.7916	64.3374	67.3743	99.6715	99.1147	161.705	195.331	198.964	130.592	134.542	126.534	395.705	336.729	321.222	365.396	290.654	332.651	323.157	316.259	311.368	50.1012	32.2924	27.4922	11.7993	58.7175	37.5226	24.6534	12.2323
YHR135C	YCK1	1616	55.7268	34.4844	688	65.3375	87.4917	55.3031	75.8026	60.3368	64.3527	98.0076	91.872	68.6766	52.7646	53.3909	78.4964	68.3821	64.6667	67.5307	72.2246	79.3651	92.3141	14.3714	58.6892	11.7054	77.9187	78.7246	68.2718	50.5046	45.4545	35.0104	30.9608	26.7649	21.0598	22.3918	18.1985	22.8561	19.2839	15.6638	16.0592	26.7372	6.15647	17.6683	4.0073	25.4492	6.77448	20.4892	4.87416
YER074W	RPS24A	873	30.0523	34.4241	689	25.8181	41.1726	21.1355	35.1701	33.4396	31.8873	46.8121	43.4163	29.9993	24.9787	28.4996	42.9921	40.8721	38.7841	38.079	37.9957	33.6942	38.73	6.79016	36.639	4.97816	41.4237	30.8482	27.4784	28.1248	35.3855	24.6369	13.5042	14.6253	13.4589	13.2404	12.7999	13.6213	12.1417	9.74991	9.62801	22.9672	13.6197	12.793	3.47641	21.9132	6.46514	14.1508	4.54609
YKR081C	RPF2	1034	35.5497	34.3808	690	43.8069	47.1769	37.6763	37.5659	42.7082	38.9199	57.4812	46.2268	36.2086	24.6349	40.9147	42.9921	43.8196	31.3777	40.3598	32.4274	35.0516	38.001	6.065	33.9663	5.42664	44.3573	39.7325	36.0441	56.5069	60.3184	51.9753	29.5774	24.2791	22.8995	22.937	21.4493	23.6807	24.9427	17.5818	16.8114	28.523	7.11479	13.966	2.43178	26.6943	5.8774	14.4088	1.68721
YGR106C	VOA1	797	27.3711	34.3427	691	37.2825	39.3498	29.9906	34.3076	27.9875	35.5481	38.9549	36.4387	26.7824	27.7859	23.9128	28.9419	31.0471	33.2094	29.6501	30.6259	30.2609	32.1687	9.0975	41.7618	7.35512	39.8981	31.3418	22.4746	29.8397	25.9877	25.0692	18.0495	16.6486	15.2018	13.3962	8.33012	10.7519	10.988	10.2827	9.89127	19.5444	6.96959	11.3268	3.37366	20.718	5.19686	12.6768	3.56189
YGL245W	GUS1	2126	72.9943	34.3341	692	107.094	116.87	90.0555	94.9689	82.0544	93.1572	93.2933	75.9786	71.669	67.2591	75.102	69.3258	84.3969	82.2668	75.3647	81.7236	77.6085	81.3786	21.1616	78.1781	17.4011	87.4239	121.048	89.9831	77.772	63.5788	65.3743	43.1475	38.9622	35.1964	37.3067	28.9087	30.8046	34.3375	26.426	24.9726	51.0933	23.7257	36.6562	12.4671	51.9941	18.5602	37.7724	14.974
YGR161C	RTS3	791	27.1554	34.3305	693	23.6744	43.5314	19.2141	41.8783	20.2637	30.5386	31.7594	51.5569	16.3836	30.9369	27.1541	57.5472	23.187	25.803	20.4278	25.9583	27.7858	34.6292	18.9202	27.0616	21.7963	35.2042	35.0436	28.8353	18.6927	16.7817	19.4502	9.35411	8.72893	7.3104	8.87885	5.77593	7.48678	6.09833	7.93845	13.6898	10.8139	4.50119	11.8766	7.46658	13.5962	10.0225	13.5612	15.5364
YDL125C	HNT1	587	20.1386	34.3076	694	13.1421	23.8029	10.4424	19.2621	16.4472	17.6295	27.0451	30.0425	18.0295	29.7338	17.3689	29.026	22.4993	27.4754	18.5437	25.3851	23.1548	27.1566	16.9424	34.189	13.006	26.5205	27.5166	21.4569	18.9499	12.5623	17.5052	5.33579	6.87909	4.7445	7.55481	6.12423	6.0356	4.45013	3.35653	4.13703	11.806	3.80424	7.58784	3.40791	11.1558	5.75367	9.06538	6.3036
YDL122W	UBP1	2429	83.0155	34.1768	695	108.306	120.837	90.9744	99.0896	95.8664	95.951	107.519	94.0041	91.2695	71.9569	75.5301	91.7053	93.2394	92.7792	85.4794	89.7485	84.9542	100.334	20.5023	74.6144	16.9526	93.5259	120.555	100.584	82.5738	98.8684	75.4236	46.1777	42.8931	34.6639	44.3943	32.0143	39.116	31.6454	29.0899	27.6053	65.8756	21.1701	44.8306	11.765	65.6899	21.0968	45.2901	13.6383
YJL136C	RPS21B	723	24.7015	34.1652	696	30.5716	33.6671	21.8038	26.2578	30.7136	28.5156	33.4136	37.0202	23.7151	24.4058	26.9707	34.3264	29.5733	34.0057	27.7659	30.9534	25.3106	31.6219	5.60353	28.9548	3.76726	32.0359	27.1464	23.7467	24.2662	26.1795	24.5289	12.9113	12.7755	12.1033	11.6827	10.9423	11.5435	10.6583	9.37696	7.5971	17.3618	10.9481	8.72418	2.68866	17.3812	6.03207	9.54445	2.83545
YKR011C	YKR011C	1061	36.2492	34.1651	697	42.2224	61.0083	39.6812	57.5946	44.98	46.3378	49.2106	61.8295	35.236	37.7544	25.6863	48.5449	50.4023	65.1445	45.8138	56.0928	50.6212	57.8672	22.6778	54.5687	15.9211	53.2758	47.753	31.3796	19.2929	18.1243	16.7488	17.1931	16.0705	10.8446	8.68414	6.64668	7.18995	11.0429	8.15157	6.76969	11.2108	3.71712	11.1435	3.16816	12.6499	4.39259	11.2396	3.63219
YDL053C	PBP4	557	18.9808	34.0768	698	33.8339	33.2383	25.1454	26.9286	28.4419	21.9647	37.9624	30.4302	27.8297	16.557	22.078	21.9588	31.8331	27.8736	29.0551	23.6654	28.9036	28.159	5.99908	25.6139	5.56119	29.4542	23.4446	20.3543	17.921	17.2612	16.1004	11.7256	10.6366	11.9097	8.3726	7.66255	8.31132	10.4386	7.51223	8.04841	7.83761	2.3232	5.38846	1.25014	6.52416	2.19629	5.60137	1.71064
YCL054W	SPB1	2525	86.0054	34.0615	699	131.234	141.209	110.105	113.273	101.046	95.5656	131.669	115.131	94.4864	67.0299	99.5652	103.82	111.907	63.4721	109.775	78.1205	86.3914	84.7504	16.8765	65.8166	14.8448	95.6382	121.912	107.539	107.783	131.089	102.114	76.3479	69.5424	62.0174	63.5149	45.1626	55.8705	52.138	40.8111	47.6511	67.463	20.1247	37.8659	7.74059	62.3531	16.8589	34.0505	5.78807
YCL011C	GBP2	1283	43.6764	34.0424	700	64.1259	70.9798	55.3866	58.7446	60.155	66.4721	63.767	57.7592	50.8715	54.0249	54.3083	47.7877	49.6163	46.2701	46.7063	48.723	50.7809	49.3922	11.0752	51.3392	9.59753	46.7043	60.3391	56.3137	38.3286	35.865	32.0928	23.3194	22.3715	20.8661	21.1457	15.5863	20.1187	19.6136	12.6802	15.307	26.9852	8.24735	21.9937	4.64093	25.748	7.48596	21.9264	5.50687
YDR127W	ARO1	4766	162.228	34.0386	701	204.308	267.729	231.905	227.887	242.619	234.675	245.887	177.929	238.722	196.907	189.895	171.716	220.375	189.54	201.402	179.333	196.656	188.365	59.7271	160.031	48.3016	163.113	251.228	221.693	159.831	141.542	144.472	86.5584	72.3172	66.8103	132.677	103.851	115.699	66.6971	59.938	59.5357	80.8068	44.5473	77.9678	36.802	91.1889	45.1013	85.6052	49.7493
YIL149C	MLP2	5039	171.44	34.0225	702	279.153	338.387	237.503	280.115	262.701	208.279	279.053	257.397	228.174	148.382	159.255	212.605	264.293	217.016	267.049	219.786	231.229	249.604	50.4318	167.047	36.1029	197.261	263.814	198.2	108.383	166.571	130.533	116.268	96.5963	78.8168	70.4467	55.031	57.6845	74.6634	54.2905	59.1972	76.3919	24.684	58.9065	13.3234	81.4773	24.9944	55.7558	16.5206
YFR002W	NIC96	2519	85.6817	34.0142	703	130.862	145.712	112.778	133.876	112.859	108.089	138.12	117.941	105.783	77.7432	98.0362	100.203	121.241	100.902	114.832	108.583	113.618	109.538	32.105	86.085	24.3078	100.919	109.203	93.2059	69.2831	77.1001	67.7516	54.8072	48.2692	41.8291	39.3707	30.389	32.9484	42.5235	38.0406	32.7578	57.9884	20.5603	40.4318	9.93261	58.07	17.3229	37.4408	9.25622
YJL133C-A	YJL133C-A	224	7.61381	33.9902	704	1.86412	8.4704	1.50371	5.17489	2.45345	6.26186	2.23308	5.71777	3.51612	9.22377	1.8959	5.38453	0.687751	2.867	0.49582	2.70228	1.19766	2.18711	35.9945	29.4003	29.7793	25.4644	15.1773	11.2797	13.8909	8.24703	10.2654	2.43734	2.3123	2.71114	1.32404	1.36417	1.91292	3.2964	2.29096	2.74549	1.33934	1.1616	0.623156	1.07889	1.59369	2.62936	1.14239	2.15588
YPL012W	RRP12	3686	125.277	33.9872	705	164.229	171.231	155.133	150.168	137.484	139.013	166.82	135.095	123.438	92.295	137.605	127.883	118.195	87.7619	109.279	95.8082	90.5433	97.6908	24.3919	107.801	19.2848	142.225	182.004	154.608	184.44	192.175	156.142	99.2062	88.5032	69.7151	104.716	78.6572	96.6685	74.4436	63.8273	58.1441	126.146	37.4906	64.8815	12.1589	112.355	22.3651	61.2097	7.49871
YGR146C	ECL1	635	21.5809	33.9856	706	21.6238	30.4505	18.6293	31.5285	15.3568	17.6295	29.0301	35.5665	10.1743	14.2653	22.9342	33.6533	14.148	24.4491	12.4947	22.6828	17.4859	23.6025	19.3157	23.498	27.492	30.2756	22.3341	15.0961	17.8352	20.5217	20.3147	11.2645	10.3475	6.1969	12.5394	11.8131	12.467	9.99907	6.18027	10.493	20.1893	12.9518	9.64059	6.74733	22.3116	19.8594	12.4557	13.0759
YPL215W	CBP3	1007	34.1512	33.9138	707	46.2303	52.4307	39.0129	42.9324	51.5225	46.0488	50.6993	41.2843	42.0438	37.5826	32.5972	38.9537	44.4091	44.9959	44.723	44.0554	41.7585	43.1042	13.844	38.8663	10.5393	41.0716	51.825	38.758	32.9266	31.7415	30.2559	22.6607	18.7296	17.2351	14.6813	13.3804	13.0936	18.0752	13.4794	13.0505	18.3539	7.20191	13.4528	3.49354	18.8255	6.74355	15.4406	3.93682
YML009C	MRPL39	212	7.17521	33.8453	708	9.50703	10.1859	5.34652	7.47484	7.08775	8.57393	14.0602	11.2417	9.57582	8.4217	8.07285	10.7691	9.23552	12.5829	9.61891	9.90837	11.4177	9.2952	1.31848	12.2501	1.56969	10.9133	9.13107	5.51263	7.0312	5.17837	6.59146	3.95244	3.69968	3.77623	2.14183	2.23491	2.11081	5.05447	3.24997	2.33178	3.42275	0.784079	1.86947	0.274003	2.78896	0.928011	1.62145	0.53897
YGR128C	UTP8	2141	72.4621	33.845	709	106.814	109.793	100.414	91.5189	81.8726	80.3445	108.015	89.5462	78.9257	58.0353	79.3219	78.4122	85.3794	66.1798	78.8354	68.4578	69.4644	71.5366	12.5255	59.5802	12.5575	76.5106	90.2001	78.873	92.3489	104.43	84.8245	49.9325	40.523	36.9877	45.1342	35.0329	40.5012	36.3153	34.2046	28.4703	68.1575	20.4732	35.4832	6.8672	64.9926	14.6007	35.6351	5.64747
YOL068C	HST1	1511	51.1262	33.836	710	71.5824	74.8397	58.3105	70.0527	71.0593	62.2333	68.1504	64.6399	55.5846	49.7854	51.8008	55.528	60.0309	55.7471	59.3001	61.1698	62.7575	67.0713	19.7113	50.8937	11.526	61.8421	79.465	64.5402	43.8164	46.5094	43.5469	34.1227	27.2851	22.9963	26.6755	18.3437	22.0976	21.1519	17.1023	20.121	34.3764	10.193	24.633	5.30881	33.9157	10.7649	27.233	7.38154
YPR016C	TIF6	737	24.911	33.8005	711	32.0629	40.2076	23.8087	28.9411	25.3523	30.8276	32.5038	30.1395	25.361	25.5516	26.9707	25.7448	23.973	27.8736	23.9977	25.0575	24.2726	27.43	5.33984	26.5048	4.08119	30.041	31.4652	26.8847	30.097	30.6866	22.3677	16.7979	14.6831	12.297	15.499	14.5704	15.6662	11.4824	10.6024	9.17669	22.6696	5.25623	9.97049	2.1064	21.5646	3.71204	11.387	2.06215
YGR231C	PHB2	932	31.4855	33.7827	712	38.1213	53.5029	33.4993	42.6449	37.6196	43.0623	50.0376	47.002	33.8146	31.4525	28.4385	37.1028	41.1668	46.1905	35.4016	41.435	38.2453	43.8333	10.4819	41.8732	7.98299	41.3063	38.8687	35.1112	27.5246	23.2068	28.4189	14.3605	13.9316	13.1684	12.851	9.05574	10.4221	11.867	9.59008	7.33383	15.1296	4.12368	9.53062	2.14065	15.1898	4.76379	10.2446	3.06978
YER123W	YCK3	1574	53.1379	33.7598	713	87.0546	82.6668	77.9423	73.311	81.6909	60.7882	92.1354	71.0361	77.5791	47.2074	52.5347	61.249	86.8531	67.2151	93.2142	67.9665	89.1061	77.8246	25.2489	46.3277	15.2484	53.5104	70.8275	57.925	39.4433	48.1396	50.3544	40.9077	36.0719	32.2916	31.8938	19.2144	24.5382	26.4261	25.094	23.017	35.4181	15.7106	29.6182	8.81947	34.2145	14.2604	30.955	9.32652
YDR226W	ADK1	668	22.5493	33.7565	714	16.4043	27.3412	12.698	18.5913	16.9016	22.8317	17.4511	23.2587	13.466	20.7392	14.3721	24.5669	15.0323	27.3957	13.5855	22.6009	14.2921	22.6001	11.1411	37.9754	9.55268	37.5512	34.55	29.6834	27.6103	24.6452	19.8824	6.78502	7.80401	6.48738	6.85385	6.7918	7.61871	5.05447	4.10242	3.53528	15.9729	7.81175	10.557	4.05867	15.8871	6.96008	10.392	5.27253
YPR010C	RPA135	3611	121.805	33.7316	715	145.961	160.938	127.982	132.056	111.587	129.091	140.271	126.373	103.913	95.6751	129.043	109.878	105.226	91.9031	90.041	96.6271	87.6689	98.2376	17.5358	106.576	15.1139	127.557	164.236	142.65	169.092	171.749	141.014	85.7021	67.5769	61.9206	103.47	71.6622	89.8084	61.6975	52.1594	53.819	133.537	36.3871	76.7948	13.1864	134.667	25.5203	73.7391	10.9669
YGR130C	YGR130C	2450	82.6405	33.7308	716	92.7402	132.631	82.4534	113.177	102.772	84.487	119.098	126.082	101.743	79.0609	63.4208	103.484	114.363	140.244	124.253	121.275	117.291	146.172	33.2257	105.24	23.4556	111.715	151.897	105.673	42.7017	42.0023	38.9004	29.4457	26.1868	21.3987	21.1067	14.5704	17.5791	23.1297	12.6802	16.0216	26.9852	8.39255	32.1475	6.49045	29.4334	11.2908	29.7757	10.2404
YEL051W	VMA8	770	25.9721	33.73	717	35.0455	37.7415	23.1404	29.4202	30.8953	27.8412	45.8196	40.7028	30.2237	26.2963	26.6037	32.6437	40.8721	40.6954	31.3358	33.6557	33.9338	34.1735	6.98794	35.1913	5.65088	35.4389	36.8944	27.1391	24.352	25.6041	22.4758	18.9717	13.5848	14.3787	10.6702	9.78136	9.00393	10.4386	8.3114	8.23646	12.2029	4.67543	8.24765	2.50028	13.6958	4.02138	8.73372	2.41365
YCR004C	YCP4	743	25.0197	33.6739	718	30.0124	39.7787	27.4845	33.8285	28.9871	30.5386	46.3158	45.8391	22.7426	35.9211	32.4137	41.8143	25.4468	31.9351	22.6094	25.9583	26.3486	32.2598	15.2944	44.1005	11.6157	33.3267	31.9587	28.6657	21.4366	15.5351	14.4796	16.6002	15.3768	13.4589	14.3697	14.5995	13.6873	15.4381	11.0286	13.3137	8.63129	2.99112	6.01162	2.32903	9.86095	3.40271	5.74878	3.67906
YMR295C	YMR295C	593	19.931	33.6104	719	17.8024	28.1989	14.1182	22.712	23.3532	18.9783	33.8271	30.1395	21.1715	18.2757	13.7605	28.9419	23.187	28.5107	21.8161	25.6307	23.3145	31.3485	5.27391	26.2821	5.60603	33.2093	30.2312	23.4075	16.9778	20.5217	13.0749	8.43187	8.90235	8.18184	7.20433	6.47253	8.01449	5.16435	4.79504	5.49097	9.22656	2.35224	5.68171	1.31864	7.91864	1.85602	5.78563	1.26541
YNL044W	YIP3	609	20.4684	33.6099	720	26.3774	38.8137	21.8038	27.5994	27.7149	28.0339	26.4662	31.4962	21.8448	29.5046	20.0598	27.1751	17.3903	18.4762	12.8913	13.4295	13.334	14.6718	7.05386	30.2912	5.2024	29.2195	33.4395	27.1391	23.7517	20.8094	17.6132	11.0668	9.07577	8.08501	6.03606	5.13739	5.47492	6.59279	4.79504	4.43791	9.92103	2.49744	5.2785	1.04464	8.31706	2.13443	5.67508	1.19511
YML093W	UTP14	2699	90.6796	33.5975	721	130.395	144.747	105.26	104.456	105.317	104.429	149.947	126.179	112.441	71.0402	104.825	108.364	119.276	75.4179	121.278	98.5924	97.8091	107.715	17.5358	69.9371	13.8581	97.6331	138.57	125.858	103.324	128.692	100.169	74.6352	60.1198	53.7871	63.1255	47.978	59.6634	40.7654	32.553	40.2421	63.4946	19.2245	36.8762	7.05558	61.8053	14.1676	33.6819	6.3036
YDR152W	GIR2	797	26.7752	33.595	722	37.8417	44.0675	34.0005	30.666	33.7123	29.1899	49.2933	47.7773	30.2237	24.062	35.4716	41.646	37.3351	31.3777	33.0216	25.9583	35.6903	38.4566	8.04272	32.0731	6.77209	34.3828	33.1927	28.8353	28.9823	29.0564	25.8256	17.0614	13.4691	15.0565	15.7327	14.7446	14.9076	13.9547	8.57779	9.74083	13.8398	4.356	9.49396	2.3119	12.0025	3.80485	9.39704	2.43708
YDR153C	ENT5	1235	41.4758	33.5836	723	62.821	71.3014	46.9491	57.978	55.7933	54.141	78.985	64.7368	53.1907	39.244	49.4768	63.0158	68.6769	45.633	57.0193	50.6883	62.0389	58.1406	8.76788	42.5413	7.39997	51.5155	59.2285	47.9175	35.3275	35.6732	31.1203	22.0019	19.4233	19.2685	22.2361	17.9663	21.0421	15.1634	13.1597	14.4796	20.5365	4.32696	15.2856	2.46603	19.5725	5.04219	16.7673	2.99948
YLR297W	YLR297W	389	13.0491	33.5452	724	1.58451	6.86209	1.25309	4.79157	2.27172	5.49117	3.80451	19.8668	2.31914	19.3642	2.50748	22.8001	3.53701	18.1576	3.17325	16.7869	3.19377	22.2356	8.96565	13.6979	7.8036	12.2041	13.82	16.5379	13.6337	13.4254	11.0218	0.65874	0.289037	0.726199	1.71346	1.10294	1.22031	0.494459	0.639338	0.413703	12.1037	6.53399	5.24184	4.45255	13.6958	10.0225	8.77057	7.03004
YPL146C	NOP53	1367	45.8459	33.5376	725	66.6424	70.6581	49.2047	52.7072	57.2472	36.8968	88.579	73.362	59.7741	35.9211	47.5197	65.1192	63.2731	46.5887	72.4889	51.9985	57.887	61.6946	11.0093	44.7686	7.08603	59.1431	60.2157	51.9036	42.1872	78.3468	45.816	41.9617	30.2333	27.3051	25.0399	24.2647	22.7572	24.3933	18.9138	22.0391	32.1937	7.31807	17.6316	2.72291	26.6943	6.24861	15.4406	1.96841
YNL005C	MRP7	1115	37.3249	33.4752	726	63.5666	63.1527	51.9615	49.3531	56.7929	52.5033	61.1203	49.3279	45.7844	40.1606	45.9908	36.6821	51.5813	49.5353	49.7804	44.0554	53.3359	47.5696	12.2618	52.4528	9.0145	51.6329	44.0512	44.4403	39.3576	36.728	34.4701	26.2837	22.0825	23.6741	22.275	14.5704	19.7889	23.2945	14.7581	14.7429	18.0067	4.73351	12.6097	2.75716	18.178	4.67099	13.0453	2.95262
YPL105C	SYH1	2549	85.3211	33.4724	727	115.296	154.933	98.1588	124.772	108.134	105.296	127.038	121.333	103.015	79.0609	96.6296	103.568	106.503	82.5854	109.477	95.3988	98.8471	112.089	31.3798	84.5259	22.7829	106.317	133.881	110.507	73.3989	78.7303	60.8359	50.4595	42.1995	39.0211	42.2135	34.1041	38.7202	33.6782	24.8276	31.6295	47.9186	13.9392	36.5463	8.8366	50.6992	15.0338	36.1141	10.8028
YNR021W	YNR021W	1214	40.5674	33.4163	728	58.3471	62.5094	49.4553	60.1821	50.9773	53.1777	57.8121	52.7198	45.0363	34.7753	35.1047	45.3478	58.7536	56.4639	50.772	47.5765	55.5715	49.3922	13.844	42.5413	9.95632	54.8013	51.4548	36.8922	31.3832	39.9885	31.9848	25.4932	20.6373	18.397	15.7716	11.3197	14.0171	20.4926	14.7581	12.712	32.0449	9.78647	17.5217	4.31555	28.9852	8.41397	21.4105	5.6006
YPL019C	VTC3	2507	83.7367	33.4012	729	29.6396	34.4177	21.6367	30.1869	28.7145	22.061	30.8496	32.3684	28.7275	28.8744	20.3044	23.978	26.8223	28.5903	22.4111	21.8639	22.1967	27.2477	80.8227	154.574	44.3101	159.945	284.667	213.381	135.308	140.487	127.615	16.732	10.8678	10.6993	9.61875	5.97911	8.50921	9.22991	6.44666	7.78515	106.254	49.4551	22.287	7.22683	106.628	46.4315	24.8008	8.15485
YJR014W	TMA22	596	19.9025	33.3935	730	21.251	29.7	17.5433	21.0829	21.2633	21.0977	29.4436	29.8487	19.8249	18.9059	20.6102	29.3625	24.5625	23.7324	21.4194	26.5315	22.037	27.7945	4.87837	25.0571	3.45332	32.3879	24.185	22.1353	19.4644	27.1385	17.2891	11.3303	10.1741	8.18184	8.68414	8.06889	9.2348	7.63665	5.91388	6.8073	9.52419	2.55552	5.71837	1.18164	9.06411	2.01069	5.67508	1.42944
YHR005C	GPA1	1418	47.3515	33.3931	731	37.4689	64.9754	35.6713	45.0407	38.4374	41.81	39.9474	44.4823	28.8023	25.2651	32.0468	41.8143	80.9581	87.4434	80.6204	78.3662	83.2774	86.4819	13.9759	55.2369	9.0145	62.5462	53.5525	51.2251	38.4144	40.0844	34.4701	16.1391	12.9489	12.3454	27.9216	22.8715	25.3957	11.867	9.21713	8.19885	38.7416	13.7649	24.4497	7.39808	38.7466	16.797	28.8913	10.6388
YBR162W-A	YSY6	197	6.56717	33.3359	732	6.89726	8.25596	3.92635	6.80402	5.81559	4.91315	12.2406	11.8232	7.4063	6.0155	6.23811	7.8244	8.15476	9.87521	8.23062	7.61552	7.50535	11.938	1.84587	8.90918	1.07636	11.0307	9.13107	7.71769	7.45994	7.95934	4.53838	3.2937	3.81529	2.85638	2.92067	2.32198	3.03429	3.40628	1.38523	2.06852	2.38105	1.3068	2.16272	0.616507	2.49014	0.928011	2.10052	0.562403
YML056C	IMD4	1982	66.0606	33.3303	733	67.7609	77.5202	49.5389	59.7988	47.0699	69.8438	45.5715	57.8561	32.9917	44.2856	38.4684	59.2298	41.3633	72.7102	40.0623	64.6091	40.0818	59.9632	13.1848	56.2392	10.6739	62.5462	74.2825	59.282	77.5147	85.443	60.7279	45.1896	40.4074	33.2599	40.9673	31.6951	38.8191	28.5138	24.6678	23.8444	93.7537	45.0991	49.7791	20.0707	86.2086	47.6998	53.6921	19.4966
YKL145W	RPT1	1403	46.732	33.3086	734	53.4072	74.1964	49.3718	61.1404	47.2517	51.6363	66.4136	69.6793	44.2882	48.5251	41.5874	57.0424	58.9501	58.0567	49.6812	57.7306	48.8646	65.1576	14.4373	58.1324	11.7502	64.0717	65.2748	55.72	42.7017	39.9885	36.3071	24.1758	18.3828	17.1383	21.6519	15.9056	16.9195	17.5808	12.2007	12.4111	25.0506	7.57943	17.3384	4.38405	25.4492	7.57876	19.6048	4.99133
YHR203C	RPS4B	1054	35.1009	33.3025	735	39.2398	53.074	32.0791	41.5908	39.8913	42.388	50.6166	47.4866	30.1489	35.2909	35.5939	40.1316	36.5491	38.5452	31.2367	41.8444	34.5725	35.8139	6.3287	32.1844	5.87512	43.7706	36.4009	36.2138	33.0981	42.0982	27.2303	16.0733	15.8971	15.0565	16.3168	14.7736	17.3812	14.3393	12.6802	11.3204	32.3426	14.2877	15.7988	4.4183	33.1188	8.3521	20.4155	4.80386
YGL244W	RTF1	1676	55.797	33.2918	736	87.8934	107.113	71.1756	81.4566	80.0552	68.6878	98.5038	84.7975	83.4144	55.4572	65.439	67.9797	83.2179	68.8875	86.9669	70.1774	81.6007	80.6496	16.6128	66.4848	12.8266	69.0003	87.1153	72.2579	37.8142	47.4684	32.6331	42.8181	33.5861	28.467	28.6226	21.3622	24.6701	25.3273	19.2334	22.7161	26.0923	6.67919	19.0612	4.7608	25.2998	8.01183	18.3519	6.18644
YDL116W	NUP84	2180	72.5314	33.2713	737	117.626	123.839	106.095	99.8563	95.2303	105.585	104.707	90.4184	87.0801	72.4725	75.8359	79.4218	93.6324	88.7176	85.5786	77.7111	94.3758	82.7455	24.3919	77.6212	18.9708	73.5769	103.527	93.9692	62.5091	65.1132	55.8653	44.0697	37.2858	33.5988	33.8409	25.5128	29.6173	33.7331	25.0408	23.0922	49.8532	16.8722	31.7809	9.57298	47.7609	15.869	35.3402	8.60008
YDL143W	CCT4	1586	52.7525	33.2614	738	66.5492	77.9491	58.5611	73.1193	54.7938	63.582	77.7444	66.1905	51.3952	43.7699	53.6355	51.2372	57.5746	62.9943	54.9369	59.614	53.8948	64.064	16.8765	56.796	14.2169	69.9391	63.6707	62.7592	56.5069	54.0852	45.4919	30.5655	26.3602	23.1415	25.2346	18.4307	20.7123	22.1408	18.1679	17.3755	39.5849	12.9228	26.0626	6.71308	37.4019	10.3319	26.6802	7.87365
YMR203W	TOM40	1163	38.6783	33.2573	739	45.671	65.6188	43.524	52.8031	44.7982	50.1912	51.7745	46.4206	39.5003	35.9784	35.5328	38.6172	39.9878	48.3407	36.294	40.5342	43.6747	42.2841	11.5367	48.6664	9.91147	50.6941	58.2414	42.9985	38.5859	36.8239	24.4208	21.3432	20.3482	18.0581	16.9789	11.3197	12.9617	14.1745	13.5327	11.4709	25.8443	8.04407	18.4381	4.91493	26.7441	7.82623	21.4474	5.41313
YLR310C	CDC25	4769	158.59	33.2544	740	216.145	275.556	209.6	243.507	195.458	198.453	202.632	199.153	173.113	160.413	138.156	174.745	185.693	203.716	178.594	181.872	184.919	197.478	41.7298	162.258	32.6495	178.251	248.76	194.129	114.214	129.459	118.43	88.5346	73.7623	60.8555	84.8943	64.7543	76.7478	60.4339	51.5733	49.682	100.45	35.0222	72.5427	15.8922	101.199	31.0574	75.5448	19.0748
YOR008C	SLG1	1136	37.7761	33.2536	741	32.6222	53.2884	33.0816	40.5367	28.7145	41.1356	40.5263	50.9754	30.3733	39.1294	30.0897	45.6002	30.1628	45.4737	24.196	40.4523	32.257	41.6462	5.99908	45.2141	7.26542	49.5206	59.2285	50.5466	42.5302	33.6594	30.3639	12.3843	10.6366	10.5057	13.9803	10.1587	13.6543	12.3615	8.04501	6.65686	23.612	6.30167	17.4117	3.09966	25.0508	5.4134	18.3519	2.99948
YKL120W	OAC1	974	32.3601	33.224	742	22.0899	29.7	19.3811	21.1787	25.8976	26.5888	22.7444	24.5186	19.5257	19.3642	19.2036	28.7736	25.3485	28.5107	23.5019	28.0055	20.7595	29.4348	28.0836	40.9822	28.5684	68.6483	63.5473	61.9959	49.6472	57.1538	39.8729	36.1648	33.2971	27.5471	73.8347	55.6986	64.7425	31.9201	25.6801	28.5079	23.8601	11.7612	11.1801	3.57917	24.752	18.0343	10.2446	4.49923
YDR335W	MSN5	3674	121.966	33.1971	743	177.651	217.335	170.086	189.65	156.476	155.872	145.399	146.627	117.005	114.237	101.033	129.818	146.491	167.64	142.499	150.918	142.362	163.942	35.533	129.183	25.9223	144.22	163.866	123.144	104.01	94.7449	89.2548	65.2811	61.6228	47.7839	57.3231	43.305	48.6146	53.5664	45.1799	38.9257	76.4911	23.4933	57.0004	11.9191	77.5429	19.4264	64.7475	12.3026
YHR077C	NMD2	3382	112.271	33.1966	744	160.128	191.066	148.867	159.847	167.653	137.279	163.181	162.327	151.642	110.972	119.013	136.464	158.969	129.652	155.192	135.605	141.005	142.709	38.961	101.008	27.8508	120.633	165.593	132.388	84.4602	107.595	89.579	77.4019	60.2354	54.4649	60.8279	48.8487	52.6054	53.8961	41.0242	46.5604	74.5565	28.0526	52.4917	14.1454	71.218	21.8701	50.5598	14.435
YGR267C	FOL2	731	24.2655	33.1949	745	34.1135	35.3827	26.482	26.8328	33.2579	27.0705	37.0527	31.4962	29.2511	28.3015	22.5673	28.7736	28.296	30.7406	25.981	26.7772	29.1431	29.3437	8.96565	33.6322	7.62421	39.0767	29.7377	27.648	25.1237	28.0015	23.2322	18.9058	14.7409	13.12	18.8481	18.0244	16.0949	12.5263	12.8933	11.6213	12.9469	3.9204	9.86052	2.82566	13.1479	3.37177	8.54947	2.67142
YEL033W	MTC7	419	13.9063	33.1891	746	8.57497	14.7964	9.94119	26.162	11.9947	12.5237	14.6391	19.4792	10.0995	10.0831	7.52243	16.1536	13.1655	15.9278	13.3871	15.6405	17.0068	16.4033	15.2284	27.3957	13.4096	29.4542	17.7686	13.5696	7.97441	23.2068	8.96871	9.68348	10.2319	5.76118	4.43943	4.41177	3.82584	3.79085	3.30325	8.27407	7.14314	2.178	4.06884	1.47277	7.57002	4.33072	4.49584	2.22618
YPR067W	ISA2	557	18.4698	33.1595	747	25.1657	29.4856	18.0445	24.0537	19.7185	23.9877	29.609	26.4568	18.7028	22.4006	21.0995	22.5477	21.4185	29.546	20.0311	24.0749	23.554	28.3413	4.21913	20.157	4.17089	23.9389	25.5423	18.2341	15.8631	16.2064	9.40093	7.97075	9.01797	7.69771	8.45048	8.01084	8.21237	7.74653	5.96716	5.79185	10.7147	2.06184	5.71837	1.01039	10.4088	1.82509	6.19099	1.40601
YBR086C	IST2	2840	94.1171	33.1398	748	97.3073	139.386	90.7238	128.701	93.9581	110.979	97.9249	106.603	71.3698	86.5659	63.482	91.1164	92.3552	119.538	73.4806	116.689	91.182	117.375	25.3148	106.687	18.2084	102.327	150.539	115.511	64.567	63.2911	54.4606	35.7037	32.2566	24.9812	28.7394	18.8951	25.6595	24.1736	20.6187	16.8866	75.1518	21.1992	54.8744	10.9944	82.7722	14.91	64.5632	11.7402
YGR175C	ERG1	1490	49.3734	33.1365	749	32.6222	57.6845	27.9857	46.4782	38.1648	49.6132	39.0376	57.953	32.468	47.7803	29.7839	48.4608	30.6541	49.4557	26.1793	45.6112	31.9377	46.476	21.7549	70.2712	15.1587	77.0973	67.6193	53.5149	51.6193	47.4684	41.2777	24.1758	24.3369	20.7693	18.4976	12.6548	16.2928	19.6685	14.9712	14.2164	54.9625	21.5186	27.3822	9.36748	51.1973	22.3032	27.4541	10.4279
YGL043W	DST1	929	30.7611	33.1121	750	39.2398	46.6408	32.4133	37.0867	35.5296	34.7774	58.2256	47.4866	34.9368	27.1557	31.9856	39.7951	43.4266	36.5542	38.8723	38.4052	40.6407	43.0131	10.3501	37.0845	9.1939	49.638	41.3366	39.3517	35.2418	33.7553	28.635	18.7082	15.8971	14.3303	15.538	12.0163	13.9182	17.9654	11.7212	11.0196	11.7068	4.09464	8.28431	2.22628	12.6499	3.83578	8.25466	2.01528
YGL078C	DBP3	1571	51.9623	33.0759	751	65.99	79.343	50.792	54.528	54.2486	49.1315	71.4587	63.3801	52.2181	39.1867	54.7364	54.0977	54.6271	47.8629	49.1854	50.4426	43.2755	57.5027	7.7131	51.6733	5.74058	63.485	69.3468	57.8402	67.7396	78.4427	60.2956	35.4402	31.3317	28.8059	40.8894	29.9246	35.9168	24.6131	20.6187	22.4528	44.2974	10.89	24.413	4.6238	41.5355	7.94996	25.9432	2.74172
YJL168C	SET2	2201	72.7964	33.0742	752	96.6548	128.771	87.967	109.823	101.137	89.0148	118.85	113.677	99.9476	81.4671	78.8938	105.082	87.9339	68.569	80.5212	72.5522	80.6426	90.3093	16.481	72.2757	12.6024	76.7453	127.095	108.896	54.0202	66.9352	53.9203	34.4521	30.7536	30.2099	25.7019	19.1564	24.3733	27.2502	19.8195	20.3467	34.8724	9.29279	26.759	5.56569	36.9039	10.2081	27.3435	6.65511
YMR037C	MSN2	2114	69.7885	33.0126	753	68.693	107.113	70.7579	98.0355	74.2397	79.0921	92.2181	104.277	75.7088	71.5558	54.8587	90.9481	75.6526	86.7266	75.563	90.9768	88.3875	105.528	24.7874	67.7098	16.1005	68.6483	117.84	84.9793	40.9868	48.9068	41.0615	22.5948	21.3888	18.2034	36.0217	22.0879	31.0685	18.5148	14.7581	13.3137	39.6345	25.2067	35.8864	17.4506	41.9837	29.0777	40.61	24.7457
YLR221C	RSA3	662	21.8483	33.0035	754	32.6222	30.5578	23.1404	23.9578	25.1706	22.2537	33.1654	31.4962	25.9595	16.7288	23.607	26.2496	27.3135	22.697	30.0467	23.0103	23.1548	22.6912	5.40576	26.8389	4.08119	34.0308	26.6528	23.4075	29.411	32.9881	27.4464	18.313	18.1515	15.1533	10.4365	11.1745	10.0923	15.7678	12.4138	10.9443	15.0304	3.51384	7.51453	1.16451	11.7535	3.18617	7.29653	1.24197
YML038C	YMD8	1328	43.8003	32.9821	755	54.246	66.7982	49.873	65.5486	52.6129	56.6458	65.8346	72.8774	50.1982	57.5197	51.1281	64.9509	41.4616	41.0936	39.269	36.5218	38.8841	41.0994	17.4039	54.346	12.1987	56.4441	58.4882	46.6454	36.185	36.4404	31.8767	26.4155	22.4871	20.3336	24.3779	20.4044	23.8126	17.1413	14.1187	16.0968	28.3245	8.10215	18.5114	4.6923	28.8856	7.08382	22.6635	4.99133
YOR224C	RPB8	440	14.5055	32.967	756	26.7502	22.8379	16.1231	18.5913	22.4445	19.7489	22.9098	16.6688	13.8401	13.3487	19.5705	15.144	19.0605	17.6002	15.4696	16.5412	18.2045	15.8565	3.09842	18.5979	3.00483	21.3572	19.4961	17.0468	18.3497	19.0832	13.0749	11.1986	10.6366	11.7644	9.6577	10.1587	9.53163	11.2627	8.52451	7.14579	7.78801	2.4684	4.87528	0.959011	8.9645	2.19629	4.93805	1.26541
YNL091W	NST1	3722	122.685	32.9622	757	176.253	223.769	151.875	189.554	166.108	142.674	192.211	175.507	166.53	117.446	122.744	147.57	179.798	132.837	190.494	149.608	165.677	172.69	43.5757	108.581	28.3441	150.909	213.84	159.103	84.9747	114.787	81.0425	94.3974	75.67	58.7737	58.5303	41.5055	55.3758	50.8744	41.0242	50.1333	61.6592	20.8507	47.2132	10.8916	64.7934	17.3847	48.8278	12.5369
YGR167W	CLC1	701	23.1049	32.96	758	35.4184	39.9931	25.8972	32.4868	28.1693	30.4423	38.5414	34.5005	26.2587	22.9735	27.093	28.6895	31.1453	31.6166	34.7074	30.4621	32.8958	34.3558	9.0975	34.189	6.00967	34.9695	29.9845	24.9341	18.7785	18.1243	13.6151	11.0668	11.5615	11.3771	6.93173	6.82083	7.22293	9.39473	6.02044	6.28077	9.97063	2.52648	7.99106	2.02077	9.71154	3.68111	7.48078	2.81202
YGL188C-A	YGL188C-A	140	4.6087	32.9193	759	5.59237	5.57545	4.42759	4.21658	8.35991	5.00949	8.18798	8.04365	6.95743	6.30196	6.17695	8.16093	5.50201	6.13218	5.45402	6.79665	5.11003	6.10567	1.58217	4.45459	1.07636	4.92859	5.1825	3.4772	4.03008	4.98657	2.59336	1.84447	2.77476	2.5659	3.50481	3.07663	4.32057	3.46122	1.86474	2.33178	4.46446	0.987359	1.68619	0.325379	3.83481	1.02081	1.36349	0.374936
YFR050C	PRE4	800	26.3294	32.9117	760	41.2903	44.0675	34.5853	31.816	29.8049	38.1492	36.391	34.2097	24.6129	28.1296	28.7442	28.4371	28.1978	37.2709	23.2044	31.8542	30.3408	34.7203	9.0975	35.1913	8.34178	31.2144	34.1798	30.1923	30.6972	23.1109	18.8019	12.4502	10.3475	10.9898	11.8385	10.3328	11.1807	11.0979	8.20484	5.86707	15.5264	3.89136	8.76084	2.43178	15.9867	4.94939	9.54445	2.29648
YKL104C	GFA1	2153	70.798	32.8834	761	89.6644	117.192	80.532	98.4188	78.4196	89.1111	92.7144	81.1149	71.2202	78.7744	65.5002	69.8306	83.3161	102.575	75.4638	83.1156	81.3612	92.0408	19.909	82.2986	16.3248	91.7657	89.83	71.6642	57.9646	59.8389	53.7042	36.0331	33.0659	26.8209	41.2399	28.0089	32.7176	28.4589	23.8686	19.4817	45.1407	16.4366	33.8337	7.96322	47.7111	14.2914	37.7356	11.4121
YDR062W	LCB2	1685	55.383	32.8682	762	65.7104	85.4545	61.9862	80.2108	60.6094	65.1234	64.8422	59.3098	52.5922	53.7385	45.9908	54.0136	57.8693	65.2241	52.9536	59.5321	54.5336	59.143	11.0752	64.2575	9.23875	72.1687	71.321	56.9073	49.2184	50.8247	43.6549	27.8647	26.9383	21.8828	24.0664	16.9505	18.3377	23.9538	18.2211	15.6455	46.9265	11.2385	32.844	5.08618	44.1751	9.71318	34.7506	6.4442
YOR247W	SRL1	632	20.7581	32.8451	763	14.6334	40.5292	15.956	35.2659	19.1733	26.4925	14.0602	20.0607	12.4935	16.557	8.50096	15.3964	18.6675	27.0772	14.478	25.2213	17.406	26.7009	29.2043	30.6253	25.6532	29.5716	30.1078	16.8771	13.0334	20.1381	14.4796	11.3962	10.5788	8.08501	7.47693	5.89203	6.95908	6.70267	5.3811	2.44461	13.2446	10.8029	9.05409	7.86046	14.2436	13.2396	11.3502	13.3336
YML081C-A	ATP18	179	5.87178	32.8032	764	6.71085	10.2931	6.76669	7.37901	7.45123	6.64721	8.68422	6.88071	5.83527	5.4426	5.01495	5.13213	6.77926	8.68062	6.54483	7.36986	7.10613	6.65245	1.84587	9.13191	1.3903	7.04085	7.89714	7.46326	6.85971	6.23322	4.32227	3.75482	3.69968	3.77623	2.68702	2.32198	2.57255	3.90073	2.13113	2.8207	3.02591	1.39392	2.41931	1.02751	3.88462	0.866144	2.50588	0.726438
YCR033W	SNT1	3680	120.706	32.8005	765	159.01	205.756	133.329	180.259	147.752	146.431	165.993	171.436	144.685	111.545	115.283	151.776	143.642	120.732	146.168	144.695	142.043	166.676	33.819	112.144	26.1914	138.353	215.814	172.333	100.323	100.69	86.7695	63.5025	53.1829	42.3132	53.8183	36.7454	49.1093	40.8753	35.3235	37.5342	57.0955	20.4732	51.0255	13.3919	63.0005	20.4162	48.9015	15.2552
YJL012C	VTC4	2165	70.9898	32.7897	766	47.5352	59.1856	44.7771	44.1782	48.0695	43.833	43.6692	46.3237	44.737	35.1764	37.3064	34.9153	40.6756	39.899	38.079	35.7029	37.2872	40.1881	48.9156	130.631	32.3356	132.368	203.968	147.145	109.498	101.17	94.7657	25.4274	23.0074	18.2034	18.7702	13.7287	15.0725	18.8444	16.8359	12.8624	63.2466	27.5299	22.7635	6.2507	68.2298	27.9331	24.764	7.45184
YKL080W	VMA5	1178	38.621	32.7852	767	49.5857	59.5072	41.9368	54.0489	44.8891	44.5074	49.7895	44.2885	38.827	35.1764	40.0585	39.7109	49.0268	45.9516	38.1782	45.8569	45.8305	46.7494	15.8217	53.5665	11.5709	59.4952	50.9612	46.9846	38.9289	33.2758	32.9573	20.8162	20.8685	19.8978	16.9399	11.755	14.5778	20.3278	16.3564	13.1257	25.0506	7.98599	15.7255	4.46968	24.4034	6.99102	17.5043	5.13193
YOR326W	MYO2	4724	154.814	32.7718	768	214.281	283.49	189.885	228.366	196.185	190.264	203.211	195.083	172.664	148.669	130.878	162.798	191.883	198.062	177.305	192.271	171.425	194.835	46.0149	173.84	31.1696	191.511	237.655	187.43	116.701	124.568	103.194	80.7615	72.4906	58.58	61.5678	52.7381	61.7082	54.885	41.0242	37.7598	89.8349	30.2596	65.2114	14.7619	99.9542	25.7059	66.6637	15.2786
YCR082W	AHC2	386	12.6426	32.7529	769	21.0646	20.5863	18.3787	14.5664	17.4468	14.9321	21.2557	20.0607	15.5607	13.0622	17.2465	13.6296	18.6675	19.2726	18.147	16.4594	12.7751	16.4944	6.3287	16.9274	3.94665	18.5409	15.7943	14.3328	15.2629	11.028	10.1573	8.1025	8.32428	7.06834	6.19183	6.61765	7.02504	7.63665	7.03272	4.24986	6.59748	2.0328	3.92222	0.667883	6.02614	1.45388	3.86937	0.796738
YLR432W	IMD3	1571	51.428	32.7358	770	41.7564	67.7632	34.9195	51.9406	35.1662	50.5766	41.3534	48.7465	35.8345	41.7648	33.5146	47.6194	37.7281	53.9154	31.8317	53.9638	30.5005	51.397	12.0641	47.1073	8.92481	55.5054	73.2953	60.9782	57.1071	64.4419	50.5705	26.3496	23.123	21.4471	26.4808	22.8425	24.901	18.4598	13.5327	14.1035	52.8295	28.4592	33.2472	13.7687	55.0321	27.4691	36.63	15.5598
YMR173W	DDR48	1292	42.2568	32.7065	771	5.59237	45.5686	5.76422	43.6991	5.99733	31.791	18.1955	61.6357	7.18187	49.0407	15.8399	53.7612	13.0673	54.234	16.0646	55.3558	14.0526	53.1285	44.9601	50.2255	45.5659	61.6074	80.9457	68.187	39.0146	41.0433	31.0123	3.09608	1.67642	1.59764	4.59519	5.19544	5.44193	1.04386	1.27868	1.57959	20.0901	10.89	16.7885	9.84699	18.6262	17.0135	15.846	15.3489
YBR029C	CDS1	1373	44.8886	32.6938	772	48.374	69.8004	41.6026	69.2861	53.4307	63.004	55.8271	65.1245	49.5998	67.1445	39.3246	55.4438	27.6083	29.0681	24.0969	26.1221	24.5122	28.3413	12.6574	68.0439	5.83028	47.0563	97.7271	72.2579	48.6182	42.0982	34.254	15.3486	15.7814	12.6843	11.9553	8.99769	10.686	13.2405	7.45895	7.82275	22.9176	4.12368	14.7725	2.5174	22.1124	4.36165	13.9297	2.50738
YPL090C	RPS6A	1104	36.0935	32.6934	773	39.8923	44.2819	29.9906	41.2075	35.984	38.7272	43.3384	46.2268	33.4406	32.0254	30.1509	49.218	40.7738	49.376	35.5007	40.2067	33.5345	43.3776	9.16343	39.2004	6.503	44.9441	37.0178	33.3302	41.3298	42.0982	39.1165	18.6423	16.5907	15.928	15.8885	13.5256	14.182	13.735	13.9056	10.3426	33.2851	14.0844	15.6522	4.40117	30.3797	7.39315	16.5462	4.54609
YBR199W	KTR4	1394	45.5461	32.673	774	65.2443	73.8747	62.8216	69.3819	62.5176	69.3622	66.3309	57.8561	51.096	54.8843	45.3181	54.6866	56.6903	66.6576	47.8962	54.7007	56.849	57.5938	17.9313	56.2392	13.4096	61.8421	72.555	51.8187	32.5836	26.9467	26.0417	22.9241	21.0997	21.4471	19.4322	15.0929	14.9736	21.2618	13.3196	12.9752	22.7192	8.59583	17.8516	5.56569	22.3614	8.78517	18.4624	6.0224
YER006W	NUG1	1562	50.9578	32.6234	775	69.8114	69.4787	57.8093	57.5946	53.5216	51.6363	77.1655	63.9615	55.5846	35.4055	57.9778	58.3044	52.1708	38.4655	48.8879	47.7403	41.5988	50.5768	8.96565	43.8777	8.61087	65.8319	60.8327	53.0061	75.8855	79.6893	65.0501	41.1712	40.4074	30.7908	37.8909	27.3994	37.8297	29.3929	23.9219	24.3709	45.8848	13.1551	25.6594	5.13756	45.7688	10.6103	23.4005	3.96026
YDL067C	COX9	179	5.83868	32.6183	776	8.85459	8.89928	8.35394	7.47484	10.6316	10.308	8.84963	6.20233	5.98489	7.04673	7.88938	5.048	7.07401	7.24713	7.04065	7.36986	6.54722	7.19923	1.45033	9.02055	1.83878	7.27554	7.52696	6.61516	7.45994	5.56195	5.83506	4.87467	5.02925	5.27704	6.81491	7.05303	5.73877	4.83471	3.83603	3.91138	2.57947	0.958319	1.46625	0.479505	3.33679	1.33015	1.69515	0.867038
YDR280W	RRP45	917	29.9025	32.6091	777	48.4672	48.8924	38.6787	38.3325	41.4361	36.4151	48.4662	47.6804	37.3307	29.3327	36.3278	37.1028	35.6648	27.8736	33.6166	31.7723	35.7702	28.6146	8.63603	31.9617	5.69573	37.4338	38.2518	38.9277	32.4121	29.6318	28.635	17.7201	13.816	16.17	17.0957	14.3382	16.7546	12.5263	10.922	11.8094	23.116	5.92415	12.1332	2.53453	19.4231	5.07313	11.5713	2.31991
YHR190W	ERG9	1334	43.4391	32.563	778	54.5256	65.6188	45.1948	58.0738	48.8873	51.4436	57.4812	64.2523	43.0164	45.3741	37.7956	52.7516	50.9918	60.2069	45.6155	54.9464	48.0662	55.0422	29.5339	60.0256	22.0654	64.0717	58.3648	48.0023	32.8409	29.44	26.7981	22.0019	20.117	17.8161	16.1611	11.0004	13.9182	21.8111	15.8769	13.7274	25.8443	11.3546	19.4645	6.88433	25.5488	12.59	20.8946	8.97502
YBL030C	PET9	956	31.1172	32.5494	779	34.2999	41.8159	33.3322	38.9075	38.4374	42.0026	31.4286	26.263	24.538	29.1609	26.1756	23.5573	26.8223	42.2085	22.9069	32.5093	30.0214	33.9002	20.2386	46.6618	17.5357	36.7298	37.1412	24.51	25.5524	25.8918	20.5308	16.6002	18.3828	16.6542	17.6409	13.0321	13.9511	17.0863	12.9999	11.4333	27.0844	15.7106	22.067	13.135	33.4177	22.8291	30.3653	29.6902
YOR209C	NPT1	1289	41.9527	32.5467	780	53.0343	58.0061	45.4454	51.5573	49.0691	49.1315	56.4061	56.1117	46.3829	42.7387	36.5113	45.7685	46.0793	44.0402	40.6573	40.9437	39.9221	46.9317	16.0854	52.2301	14.1272	58.9084	57.501	44.7795	46.7318	43.2489	41.3857	23.6488	22.0825	19.0264	21.8466	17.1827	17.5791	17.416	15.504	16.5857	30.408	12.8066	20.4542	7.48371	29.7323	8.75424	21.3	6.25674
YMR015C	ERG5	1616	52.5332	32.5082	781	19.2005	55.7545	15.3712	48.3948	15.8111	43.7367	24.9775	56.4025	18.1043	50.8167	20.7937	53.9294	16.506	40.5361	14.8746	38.6508	15.0107	44.7446	29.5339	59.9142	20.7199	53.5104	81.686	58.9428	40.0436	40.2762	31.4445	13.3724	12.9489	10.2152	23.8327	15.18	20.6134	13.5702	8.41796	6.65686	78.1281	35.603	41.2749	15.9093	77.5429	40.7397	46.7641	23.8553
YLL029W	FRA1	2249	73.0468	32.4797	782	84.2584	112.045	76.9398	105.51	82.7813	91.4232	107.932	95.5547	78.5517	86.6232	94.3056	86.5732	71.0349	76.6125	65.7458	75.3364	77.6884	78.3713	19.909	95.6623	16.5042	100.801	118.704	95.2413	71.5982	71.9217	61.8084	37.2847	37.5171	28.6606	43.0702	31.4339	39.116	28.5688	22.8031	24.07	34.2275	8.27639	27.7488	4.98343	37.0035	7.91903	30.4759	5.55373
YPR137W	RRP9	1721	55.858	32.4567	783	90.876	93.9249	73.7653	68.7111	73.4218	69.8438	90.2332	75.5909	63.4398	52.7073	75.5912	71.5974	69.1681	45.9516	69.514	55.1921	62.1986	62.8793	12.13	39.5345	9.05935	55.1533	78.231	76.4136	67.5681	67.3188	59.6473	39.2609	31.4473	29.9678	41.5515	39.6188	39.116	27.3601	22.3236	24.07	43.2061	12.5453	24.8896	4.8293	37.8501	11.5073	23.1794	5.46
YGL228W	SHE10	1733	56.2068	32.4333	784	70.9299	85.4545	62.1533	74.7484	60.7911	63.582	86.7595	77.8199	62.7665	53.2802	55.0422	61.838	73.6876	73.3473	65.3491	71.1601	69.0652	78.2802	18.4587	65.037	13.006	75.5718	87.8557	70.1376	51.7051	45.934	43.5469	34.1886	33.0081	28.5154	25.7798	16.1378	23.5158	22.1408	21.4178	22.3776	30.904	9.87359	23.0201	6.01094	30.5291	8.50677	23.9901	6.39734
YDR293C	SSD1	3752	121.606	32.4109	785	169.356	225.806	181.615	189.459	170.833	170.419	182.451	152.926	149.173	137.383	122.01	123.508	150.126	172.02	133.376	150.263	161.764	168.681	44.8942	129.517	34.7574	128.73	220.75	157.661	73.7419	78.2509	64.834	49.9325	44.6852	36.0195	48.2495	38.1966	43.1727	33.0189	30.4751	28.0942	56.0042	21.0249	50.6222	15.0873	67.3832	18.4984	54.0975	18.7936
YGL048C	RPT6	1217	39.4347	32.4032	786	53.6868	64.5466	39.6812	51.9406	42.2539	45.5671	51.0301	49.6187	34.1139	37.0097	37.2452	42.2349	45.6863	56.7824	41.9464	54.8645	41.998	58.414	13.4485	53.9006	12.5127	57.6176	54.7864	44.3555	33.6126	29.2482	31.4445	19.6963	17.4001	14.7176	16.1221	13.6997	14.9736	14.3393	8.95074	8.83821	21.8263	6.15647	14.4059	3.42504	21.9132	6.96008	15.1827	3.63219
YLR262C-A	TMA7	194	6.28036	32.373	787	5.40596	7.29097	3.09096	6.4207	6.45167	4.14246	12.4887	11.3386	8.97733	7.10402	8.25633	10.1801	8.25301	8.68062	8.62727	7.86118	10.2201	8.83956	2.04364	7.68417	1.3006	13.7297	8.02053	7.29364	5.14478	6.52091	5.07867	4.67705	3.29503	3.24369	2.99856	2.96053	2.96833	2.36242	1.49179	2.407	3.12512	1.48104	1.61287	0.46238	3.23718	0.649608	1.76885	0.585837
YEL031W	SPF1	3647	117.888	32.3245	788	162.645	196.642	140.346	184.475	136.303	160.4	130.759	124.434	98.0774	117.675	110.207	103.652	116.819	131.563	97.0816	122.585	112.9	121.931	38.5655	133.415	30.5865	135.771	179.043	132.812	110.27	96.5669	90.3354	70.9463	71.9125	58.8221	66.1241	39.851	54.8811	56.5881	52.6921	40.3925	85.6185	34.3833	63.1587	17.5019	93.0316	27.3454	71.7123	19.5435
YNL098C	RAS2	968	31.2876	32.3219	789	40.9175	56.9339	29.3223	41.6866	36.8018	41.7136	43.2557	42.5441	35.9841	34.2024	29.05	36.3456	35.6648	47.1461	31.0383	37.9957	38.3252	43.651	16.6788	45.1027	15.1139	49.5206	46.7659	40.7087	25.0379	18.5079	16.5327	8.23425	8.78674	8.23025	11.7995	8.88159	10.8509	8.29593	4.84832	6.61925	10.8139	3.28152	10.2637	2.87703	12.3013	3.74298	11.2027	4.03056
YGR204W	ADE3	2840	91.7631	32.3109	790	78.3864	127.163	66.4974	107.139	66.425	96.1437	96.1053	104.858	65.5345	82.6129	74.735	91.537	87.1479	107.114	73.1831	114.151	82.9581	117.101	49.6407	117.267	57.2264	141.756	156.092	136.883	110.098	83.5251	76.5041	46.0459	39.6559	34.8091	65.9683	53.4927	63.3573	33.0189	31.3276	34.4126	41.3707	16.4947	39.8087	16.9539	46.4162	18.5912	42.7842	25.5659
YEL013W	VAC8	1736	56.0886	32.3091	791	90.9693	93.9249	81.7851	79.8275	78.147	78.2251	79.2331	66.4812	67.0307	60.4415	53.5744	56.5376	75.8491	83.1429	68.919	66.0012	73.1372	69.8963	21.2934	74.1689	17.9393	60.1993	65.3982	52.6668	46.5603	40.9474	45.1677	28.2599	28.4991	26.8694	24.4168	16.5441	19.492	26.7557	22.8564	19.0304	35.9141	14.9846	26.1725	7.68921	39.0952	12.0332	32.9449	9.74832
YER030W	CHZ1	461	14.8571	32.2279	792	19.5733	26.9123	13.3663	18.0163	20.4454	17.2442	33.9925	29.6549	26.0343	16.3278	18.8367	22.3795	27.4118	19.8301	30.7409	22.1096	24.6718	27.5211	3.09842	20.157	2.64605	23.9389	19.2493	16.1138	7.28844	11.8911	7.02369	10.4081	7.22593	9.05328	6.11395	5.54374	6.95908	6.04339	4.10242	5.00205	3.17473	1.42296	3.95887	1.04464	3.5858	0.866144	3.3166	1.24197
YFL005W	SEC4	647	20.8177	32.1757	793	27.4958	33.7744	24.0593	25.9703	24.1711	27.9375	33.579	30.3333	22.967	23.9474	20.6102	23.0525	28.3943	34.9614	25.4852	24.5662	25.5501	26.5187	4.6806	28.398	3.45332	29.8063	23.6914	18.8278	18.264	18.6997	15.9924	13.4383	13.9316	9.97313	9.19039	8.01084	9.00393	11.7571	10.2294	7.63471	11.7564	3.65904	6.81806	1.72964	10.6578	3.24804	8.66002	2.17931
YOL029C	YOL029C	605	19.453	32.1537	794	19.3869	27.3412	18.0445	29.6119	24.0802	19.5563	32.5038	35.1789	21.9197	19.135	17.7358	31.7183	22.1063	19.5115	22.2127	19.8986	17.4859	25.1517	7.18571	16.1479	5.69573	23.5868	33.6862	24.4252	21.0079	20.8094	17.181	12.0549	10.4053	7.40723	12.7341	9.46208	9.33374	6.70267	7.51223	9.55279	8.53208	2.38128	6.63478	1.60977	8.21746	2.53656	5.93303	2.08558
YNL157W	IGO1	506	16.2566	32.1276	795	21.9967	25.5184	18.8799	18.8788	20.6272	21.3867	30.4361	31.9808	23.1914	16.3851	18.2862	25.7448	25.6433	20.1486	23.5019	21.1269	28.9036	24.8783	7.51533	17.1502	4.48483	21.8266	22.5809	18.5733	13.8909	15.1515	11.454	8.69537	9.19139	7.21358	7.04856	4.46982	6.86014	7.91135	5.64749	6.13033	7.39117	2.09088	5.09521	1.31864	5.72732	2.22723	4.20103	0.984206
YCL064C	CHA1	1082	34.751	32.1174	796	2.42336	2.89495	1.83787	3.16243	3.27127	7.03255	12.9023	54.5611	43.2408	174.908	6.60506	20.192	7.27051	15.5296	8.62727	16.4594	7.58519	16.4944	91.6343	154.017	18.3878	47.4084	54.7864	69.2047	20.7506	23.2068	7.2398	1.91035	1.73422	1.93653	11.4101	12.9451	24.6701	2.1976	0.745895	1.46677	19.8421	13.4745	8.79749	5.66844	15.8871	13.6108	9.28649	10.6622
YMR125W	STO1	2907	93.2521	32.0785	797	137.106	158.364	128.066	137.135	131.941	117.53	122.654	106.118	107.055	86.7378	83.2971	94.1452	117.9	112.53	105.61	102.523	104.037	106.895	10.9434	110.919	7.48966	122.276	123.393	96.0894	78.3722	87.4568	71.5335	56.981	51.044	40.6187	36.6447	26.964	34.4656	41.4796	32.4997	29.0345	73.1676	15.7687	41.6781	5.87394	69.7239	12.5591	50.8914	6.65511
YJL061W	NUP82	2141	68.6021	32.0421	798	100.849	110.115	98.1588	108.481	91.0504	79.4775	104.541	88.3832	81.6937	64.6237	68.925	75.5517	94.2219	83.5411	93.3134	77.6292	83.9162	82.8367	19.909	66.3734	15.2933	81.3218	105.254	83.2832	63.1951	58.9758	50.8947	45.3872	38.2107	31.9527	33.8019	25.5708	30.9036	34.8319	28.6637	23.3178	46.5792	16.698	32.9906	7.41521	46.1672	13.518	31.7657	8.34232
YOR046C	DBP5	1448	46.3659	32.0207	799	66.0832	72.1592	53.7158	64.782	62.5176	58.9578	72.782	62.2171	52.293	44.9158	48.1313	56.4534	67.7926	57.5788	64.1591	60.351	52.777	62.2414	11.0752	53.9006	8.56602	66.0666	61.6964	50.2074	40.2151	46.3176	33.4976	30.1044	30.1755	26.4821	25.1957	16.1958	22.0646	22.855	16.2499	18.391	26.5884	8.53775	18.3281	4.2813	25.3496	6.89822	19.9365	3.72592
YJL138C	TIF2	1187	37.9743	31.9919	800	52.4751	58.6495	38.4281	41.8783	37.9831	39.2089	47.7218	44.9669	34.3383	31.4525	32.903	42.5715	41.2651	40.9343	34.0133	39.8791	38.405	39.8236	24.1282	42.6527	17.5357	54.3319	49.6039	39.0125	44.7596	42.9613	34.254	23.8464	23.8745	16.3637	21.6909	17.7051	20.4155	19.174	17.3154	13.9155	33.2354	20.1537	19.5744	8.10022	31.2263	13.6108	20.9683	6.98317
YFR031C-A	RPL2A	911	29.1303	31.9762	801	35.8844	43.9603	31.5779	32.6785	31.4405	38.3419	36.7218	31.0117	23.9396	28.2442	30.1509	32.3913	28.9838	29.7849	19.2378	31.4447	24.9912	30.1639	4.21913	30.0685	3.58786	39.8981	35.4137	30.4467	39.7006	36.5362	26.0417	12.3843	14.5097	13.1684	14.7981	14.1931	15.0725	11.3726	9.21713	8.87582	22.9672	9.58319	13.013	4.45255	22.7101	6.27954	15.6249	4.59296
YJR139C	HOM6	1079	34.5018	31.9757	802	34.4863	48.7852	33.1651	39.195	37.9831	38.0529	34.9023	35.9541	28.129	32.14	24.5243	35.5043	38.4158	47.624	35.5007	43.0727	38.8841	41.7373	14.1736	53.0096	12.6921	49.4033	41.2132	33.8391	36.2707	36.2486	33.0654	28.0623	23.5276	19.0264	23.9495	15.9346	19.9867	22.6902	14.9712	16.5105	26.0427	10.193	15.139	4.86356	24.752	8.84704	16.7304	5.99897
YOL004W	SIN3	4610	147.334	31.9597	803	205.892	276.092	188.298	225.587	183.918	200.572	204.203	183.453	165.033	147.122	133.691	156.656	189.525	204.592	179.289	186.376	176.456	208.413	37.8403	157.47	27.7162	153.491	228.4	172.249	107.526	107.02	80.9345	77.0726	66.1896	54.5617	65.8904	48.5875	61.0816	49.8305	45.3398	41.6712	78.0289	24.4226	65.8346	14.9332	88.6988	21.6536	71.4544	16.8252
YPR033C	HTS1	1640	52.3627	31.9285	804	75.5902	85.6689	65.0772	65.1653	67.1519	66.2794	72.5339	59.116	57.0809	46.4053	57.7943	50.3117	65.0416	59.3309	57.5151	54.7007	55.0925	47.843	9.82266	62.3643	10.36	71.934	76.1334	62.9288	53.42	56.8661	48.9497	42.884	40.3496	34.1798	48.2885	36.5422	40.5012	34.8869	35.7497	28.4327	41.6683	13.6778	26.3925	6.14794	38.0493	11.0433	27.233	7.42841
YJL140W	RPB4	665	21.1992	31.8786	805	31.8765	32.8094	28.4869	25.7786	28.1693	26.7815	43.6692	33.4344	32.6176	22.7443	29.7228	29.9515	41.5598	33.6076	37.8807	30.7896	39.443	34.9937	8.50419	25.6139	6.09937	25.3471	22.5809	24.1708	17.578	16.6858	14.4796	10.3422	11.9083	11.3771	9.57981	9.05574	9.00393	10.054	5.64749	6.99535	9.47458	3.16536	6.70809	1.91802	11.355	3.65018	7.48078	2.50738
YER112W	LSM4	563	17.927	31.842	806	31.2241	30.7722	24.7277	24.6287	27.0788	24.1804	33.8271	31.5931	25.8098	19.8798	24.8913	23.3891	32.5208	26.0419	31.7325	24.4843	33.295	29.8905	7.51533	24.2775	6.45815	23.3521	20.8534	14.5025	14.9199	14.672	14.6957	12.2526	9.2492	9.63424	5.6077	6.21131	5.63982	10.4386	7.77862	6.92013	7.49038	2.06184	4.72865	1.30151	5.92653	2.32003	4.49584	1.10137
YGL114W	YGL114W	2177	69.3109	31.8378	807	56.2965	85.8834	44.443	83.1816	43.1626	74.468	63.0226	86.6388	39.201	92.1231	56.4488	79.506	42.2476	56.9417	35.5999	53.1449	39.0438	61.1479	59.3315	94.4373	51.5307	101.036	105.994	103.722	77.6005	69.7161	61.8084	25.6909	21.9668	22.9479	47.276	32.9141	36.8732	19.0092	16.2499	19.7449	44.3966	23.3481	35.3733	20.1906	46.3664	25.5203	35.0086	27.6281
YOR051C	ETT1	1238	39.3932	31.82	808	42.2224	55.2184	31.5779	42.07	40.4365	36.9932	52.2707	52.8167	42.1935	33.5149	37.4898	46.2733	52.5638	42.6067	48.2929	44.7924	48.5452	52.764	6.85609	49.1119	6.45815	62.0768	50.5911	39.2669	37.2139	46.9889	38.5762	20.8162	19.2499	16.3153	16.7063	13.3804	15.7321	14.3393	10.6024	13.4266	32.7394	9.46703	18.5114	4.17855	27.3417	7.30035	17.32	5.0382
YML129C	COX14	212	6.74238	31.8037	809	9.78665	12.652	7.68562	7.28318	8.90512	7.22522	11.4135	9.01276	7.92998	5.55718	8.80675	9.5912	10.218	11.1494	7.53647	11.3823	11.0983	10.9355	3.09842	8.35236	2.19757	9.3878	8.88428	5.93668	7.28844	5.94553	6.4834	3.09608	4.50898	3.24369	2.18077	2.67028	2.24274	3.24146	2.55735	2.21895	2.23223	0.522719	1.7595	0.325379	2.04191	0.928011	1.87941	0.53897
YDR211W	GCD6	2138	67.9818	31.7969	810	96.3752	107.756	82.6205	86.919	82.963	88.7258	108.925	83.4407	85.5839	61.8165	69.4143	76.5613	87.3444	70.7192	84.2894	74.7631	80.1635	82.6544	18.4587	72.8326	14.5757	84.8422	91.1873	80.3148	61.4802	68.4695	59.3231	46.0459	40.0606	33.2115	45.8351	35.9037	40.9299	30.2719	27.2784	26.8155	52.4822	15.6816	33.1739	6.33632	50.998	13.6108	32.6133	7.45184
YKL181W	PRS1	1283	40.7644	31.7727	811	54.712	60.6866	46.2808	45.0407	49.7051	44.9891	54.4211	41.6719	37.5552	32.4837	41.4039	37.5235	45.5881	47.7833	40.3598	43.1546	39.9221	39.9147	9.22935	39.2004	7.84845	47.7604	47.2594	39.0125	54.0202	49.9616	42.8985	25.098	25.6087	21.3018	23.5601	21.9427	23.3838	20.8772	18.5408	14.8933	43.3549	13.9973	24.3764	5.22318	39.8422	10.3319	24.0269	4.85073
YDL191W	RPL35A	853	27.0932	31.7623	812	31.5037	36.1332	24.3935	32.966	26.261	30.635	38.8722	41.8657	25.0617	26.1818	24.5243	37.1028	29.3768	36.7931	32.03	33.8195	29.3028	31.8953	8.50419	28.5094	6.63755	36.143	28.6271	24.6796	29.3253	28.481	25.0692	13.1089	11.9083	11.3287	11.9942	14.048	12.9617	11.922	9.43024	7.52188	21.7767	10.2221	11.4001	4.02442	18.178	7.05288	12.7505	3.37442
YDR483W	KRE2	1328	42.1272	31.7223	813	48.5604	55.3256	32.4968	43.1241	40.5274	41.7136	47.97	47.099	38.0789	37.6399	32.7807	41.7301	34.3876	48.3407	32.4266	41.3531	36.3291	42.6486	10.2182	50.1141	9.14905	65.3625	71.321	52.4972	51.7051	47.6601	43.871	20.4868	18.4984	16.5573	21.3793	16.6602	17.3812	14.4492	13.4794	12.5239	32.4418	9.52511	16.6053	3.90454	32.3718	7.54782	21.2631	5.34283
YJL167W	ERG20	1058	33.5599	31.7201	814	40.8243	57.8989	36.3396	43.7949	41.8904	47.0121	47.97	51.46	41.2957	41.1919	34.0038	41.5619	37.7281	38.3859	27.5676	33.2463	30.2609	38.1832	16.8106	46.8846	11.3466	41.6584	59.1052	45.7973	27.3531	24.6452	21.7194	15.2828	16.5329	14.3303	14.9149	9.89746	13.5554	13.3504	9.21713	9.92888	16.3697	7.95695	10.0805	5.06906	15.2895	6.09394	12.1609	4.8976
YCR020W-B	HTL1	236	7.48335	31.7091	815	10.2527	10.9365	6.68315	9.19981	12.2673	6.93622	18.9399	15.5058	11.7453	7.8488	8.74559	14.0503	17.685	11.9458	18.0479	9.99026	14.7712	10.2976	1.97772	7.35008	1.47999	9.27045	8.76089	5.59744	5.05904	9.39778	6.69952	5.53341	4.39337	3.92147	3.50481	4.38274	3.79286	4.28531	2.18441	2.8207	3.37315	1.07448	2.0894	0.496631	3.83481	0.525873	1.84256	0.374936
YBR279W	PAF1	1337	42.3808	31.6984	816	54.712	73.8747	40.3495	54.8155	50.7047	48.0718	66.2482	57.7592	55.061	44.2283	44.9511	51.0689	65.1399	48.5796	61.8784	52.8992	63.6358	68.8939	11.3389	48.8891	9.1042	57.735	70.7041	55.5504	31.7262	36.9198	32.5251	22.7924	17.5735	18.3486	18.5365	14.5704	16.7875	15.1634	13.7991	13.6146	19.8421	5.40143	14.2226	3.59629	18.7258	5.47527	13.7086	3.93682
YJL174W	KRE9	830	26.2874	31.6716	817	31.7833	45.5686	24.1429	33.6368	28.0784	29.4789	38.2933	34.2097	25.6602	28.8744	26.1145	29.8673	29.082	31.3777	23.2044	28.9881	30.8198	32.5332	9.75674	36.9731	6.72724	34.1481	35.5371	28.6657	28.9823	21.097	20.0985	13.4383	15.2612	11.8612	13.513	9.34598	11.2796	12.2516	7.77862	7.48427	18.4531	4.55927	10.7403	2.29478	14.8412	4.48539	11.8661	2.76515
YJR145C	RPS4A	1041	32.9347	31.6376	818	35.5116	52.5379	32.0791	35.5534	34.4392	42.966	41.4361	36.4387	27.4557	34.317	34.86	38.3648	35.5666	39.9787	27.6668	36.1123	33.5345	38.3655	5.27391	32.2958	4.48483	38.2553	40.3494	29.0897	34.813	30.6866	26.582	16.205	14.7987	15.1049	15.9274	14.6285	17.5131	12.6911	9.21713	9.70322	34.3764	13.3293	16.1654	4.64093	31.7742	8.1665	16.583	5.29596
YOR260W	GCD1	1736	54.8109	31.5731	819	81.6486	87.2773	69.7554	78.0067	69.7871	56.3568	87.7519	74.7187	61.4947	45.0876	55.2868	58.3885	76.4386	61.3218	78.1413	64.1178	71.9396	69.5318	25.4466	58.021	18.9708	66.536	67.7427	54.1934	59.508	52.2631	44.6274	29.6433	27.3429	23.3836	27.1039	21.6235	24.2413	24.1736	22.5367	18.5038	47.2241	14.4909	26.4291	8.16872	44.2249	17.725	26.6802	8.64695
YOR317W	FAA1	2102	66.3384	31.5597	820	49.0265	84.3823	39.7648	73.7901	50.7047	73.2156	52.6843	70.9392	60.0733	86.1649	34.2485	59.1457	37.4333	65.3834	32.03	47.0033	37.8461	52.0349	32.6983	126.288	14.486	85.781	213.593	145.703	49.9044	47.0848	36.0909	23.9781	22.4871	18.7843	26.4418	17.7342	24.7031	19.4487	19.4998	15.307	23.2152	7.98599	23.5699	6.37057	26.6445	10.3009	28.1543	12.3729
YNL037C	IDH1	1082	34.1196	31.5338	821	12.0236	70.0148	13.8675	48.3948	10.1773	48.3608	16.4587	49.9094	11.5209	31.0515	15.6564	46.1892	5.10901	25.564	4.85904	23.3379	6.70691	26.4275	68.1653	58.1324	69.9185	66.6534	42.6939	41.3871	52.0481	31.7415	36.4151	2.76671	2.37011	2.27542	8.33366	7.40132	7.94852	2.03278	1.86474	0.977844	9.42498	6.09839	5.71837	4.31555	12.9985	11.2599	10.0235	9.86549
YER049W	TPA1	1934	60.9298	31.5045	822	65.524	75.3758	52.7969	65.5486	55.0664	62.9076	67.0752	77.2384	47.5799	56.5457	54.1248	67.9797	50.4023	51.1281	46.0121	50.3607	42.1577	49.8478	18.3269	74.2803	15.6969	89.0667	84.8943	70.3073	91.0627	80.7442	66.0226	40.4466	34.1064	30.0162	45.4457	33.7849	38.2914	30.217	24.0285	26.3266	52.3334	18.0919	30.5346	7.65496	48.8565	12.2497	29.9231	6.39734
YBR031W	RPL4A	1088	34.1972	31.4313	823	32.529	50.0718	30.3248	35.3618	31.7131	34.5847	44.9925	43.5132	27.0816	29.9056	34.1261	40.1316	37.2368	36.8727	31.9308	38.1595	35.2911	43.2865	12.13	34.9685	9.59753	41.893	45.4086	37.9099	39.2718	36.5362	27.8786	16.205	16.9954	15.5407	22.8981	19.3305	23.021	13.5702	12.3073	11.0196	30.6064	14.5781	19.941	7.72346	28.6366	10.3009	18.2045	8.34232
YKL016C	ATP7	524	16.4637	31.4192	824	20.5986	23.374	14.7029	18.9746	20.6272	18.4002	27.7068	23.2587	19.3013	15.4684	15.9622	20.4444	24.4643	29.2274	25.6835	26.9409	23.075	25.334	6.65832	23.6093	4.70907	25.8164	15.4241	10.7708	11.49	10.5485	11.0218	9.94697	9.88508	8.7628	7.0875	6.21131	5.60684	8.84533	6.71305	6.46882	9.77221	3.86232	7.3679	2.1749	10.9566	4.11418	9.02853	3.32755
YOR184W	SER1	1187	37.2442	31.3767	825	35.8844	45.0325	32.5804	42.2616	27.6241	33.8141	42.2632	48.3588	26.2587	41.9366	30.4567	46.9464	28.8855	41.0936	22.9069	36.6036	24.5122	37.1808	21.8208	51.0051	27.8059	63.1329	55.5268	52.6668	49.9044	42.5777	37.2796	25.9543	23.7011	22.1733	39.7601	33.2044	32.6186	19.9432	18.4343	18.9175	18.4035	8.33447	13.1596	7.84334	19.3235	10.0844	16.583	11.8105
YER141W	COX15	1460	45.7955	31.3668	826	58.6267	73.1242	47.3668	64.9736	48.7056	66.5684	60.8722	52.1384	42.4179	64.9101	54.0025	56.0328	38.8088	55.0304	36.294	50.4426	43.7546	53.493	12.8552	60.8052	11.8399	53.2758	67.4959	70.1376	37.3854	31.9333	30.9042	25.2956	21.0997	24.0614	28.9731	18.9822	25.5936	18.7895	17.9548	18.0149	24.8522	7.55039	16.2387	4.40117	24.1543	4.73286	18.1676	4.9679
YLR106C	MDN1	14732	461.503	31.3266	827	721.696	856.904	639.411	638.045	616.18	561.352	630.309	573.522	508.416	402.466	490.976	519.607	503.729	420.493	469.74	445.221	417.824	444.438	123.739	384.208	97.7692	482.885	746.773	644.3	488.926	591.293	457.404	363.559	317.132	257.22	274.621	283.63	278.924	247.944	205.068	208.168	318.515	125.017	202.012	48.7212	303.05	90.8523	181.234	39.8838
YER155C	BEM2	6503	203.5	31.2933	828	257.436	342.032	239.925	270.053	240.984	227.739	225.79	220.28	191.965	163.507	143.171	184.42	236.193	275.47	228.077	261.958	222.845	286.055	44.9601	209.143	36.2823	236.22	290.96	211.091	155.115	166.379	152.576	119.232	92.8966	74.7501	104.794	85.6522	86.2794	71.4768	67.2371	57.4672	163.697	51.8073	111.142	24.9	167.238	46.1222	118.55	25.1675
YGR065C	VHT1	1781	55.7165	31.2838	829	32.2493	48.678	29.5729	65.6445	23.2624	44.8927	54.0903	129.571	19.6753	53.051	45.9296	129.397	27.0188	25.8826	21.9153	24.5662	22.5959	27.1566	24.3919	54.4574	33.098	76.3932	61.9432	56.144	100.152	86.1143	82.5553	26.8766	23.6433	20.7693	62.4635	45.0175	52.0117	23.8989	24.8276	29.8995	35.0708	15.4202	20.6375	8.6311	35.0114	14.0748	26.7539	10.1233
YDR309C	GIC2	1151	36.0009	31.2779	830	38.0281	56.8267	29.74	47.2448	34.3483	35.4518	42.6767	45.1607	37.9292	32.0254	24.2186	39.2903	42.6406	54.7118	43.2355	45.1199	47.9065	52.2172	22.6119	40.7595	16.1005	44.1227	61.9432	40.3694	28.8108	30.2071	18.6938	18.4447	18.5562	12.9263	19.7438	17.3278	19.1952	12.7461	9.11057	8.83821	21.9255	11.2094	18.8046	8.57972	24.6524	16.0855	19.6785	13.3102
YER110C	KAP123	3341	104.468	31.2684	831	130.862	155.791	128.233	140.872	121.037	121.576	132.414	109.51	95.6086	85.5347	108.066	107.354	93.8289	78.6831	83.9919	93.6791	78.2473	81.2875	19.8431	98.7806	19.3296	124.623	160.657	114.493	134.45	138.953	112.271	79.9051	70.3517	54.4165	65.3452	48.3263	64.0499	49.5558	42.4095	43.7021	92.1168	33.3088	54.3612	14.7277	90.3422	25.1182	60.5464	15.138
YHR019C	DED81	1664	52.0305	31.2683	832	64.8715	71.3014	57.3916	57.3071	58.3376	69.5548	75.9249	62.8955	55.7343	54.1968	60.4852	63.0158	55.7078	55.0304	52.8544	63.5446	51.8987	59.6898	11.0752	52.7869	9.59753	58.439	72.0614	59.4516	56.5069	53.5098	45.3838	25.6909	24.9728	21.3987	38.9423	31.3178	36.1806	19.9432	19.3933	15.6455	34.3764	12.5743	28.4086	8.5626	38.9956	8.4449	29.6652	9.77176
YDR372C	VPS74	1037	32.3677	31.2129	833	51.7294	49.5357	46.1973	41.7825	49.8869	40.1722	47.0602	39.2491	42.1187	34.317	36.9394	34.9995	47.6513	42.9253	42.5414	35.621	41.519	36.634	12.9211	41.8732	11.1672	37.6685	39.4857	41.8112	31.8977	38.2624	34.0379	22.8583	20.0592	22.5606	13.9024	13.2934	13.0277	19.6685	14.6515	12.8624	20.4373	7.17287	13.4895	3.87029	17.4808	6.00114	14.0034	3.79622
YBR071W	YBR071W	635	19.789	31.1637	834	9.22741	27.77	8.77164	23.862	10.2682	18.7856	17.2857	31.7869	16.3088	20.6819	10.2745	29.4467	14.0498	18.5558	12.4947	18.6703	12.6154	27.9767	21.3594	24.9457	17.1769	30.2756	36.2775	26.1214	13.4622	20.9053	12.9668	3.88657	3.81529	2.1786	3.07644	2.29296	3.33112	2.52724	2.4508	1.73003	8.78011	4.84967	7.9544	4.45255	10.359	8.32117	9.94981	6.86601
YDR308C	SRB7	422	13.142	31.1422	835	19.2937	18.6563	14.6194	16.483	20.5363	16.8589	27.7068	26.0692	25.5106	15.0674	17.1242	20.3603	23.187	20.8654	25.6835	17.1145	20.6796	21.3243	3.62582	17.1502	3.63271	15.8419	14.9305	10.5164	10.2896	14.0967	10.2654	9.6176	9.59604	8.18184	6.3476	5.22446	5.07914	8.46075	6.34011	7.18339	5.10933	1.77144	3.11578	0.804884	5.47831	1.23735	3.1692	0.773305
YKL160W	ELF1	437	13.6049	31.1325	836	16.9635	20.1574	11.1107	15.1414	19.355	16.4735	24.2331	20.9329	15.2615	11.1716	15.473	15.3123	17.685	16.6445	15.2713	15.7224	16.2084	20.5041	4.87837	23.498	3.72241	21.2399	16.7814	13.9088	12.6905	14.672	13.291	7.64138	9.65385	8.47232	5.95818	4.93422	5.77175	7.52677	5.06143	5.45336	6.69669	2.70072	4.28878	1.78102	6.27515	2.01069	3.94307	1.96841
YDL132W	CDC53	2447	76.078	31.0903	837	111.568	133.918	100.665	120.172	110.587	92.6755	127.369	114.452	110.122	83.816	76.8756	98.2677	128.609	107.831	114.336	94.0886	114.976	117.101	36.7196	85.3054	25.115	91.2963	105.377	73.53	49.3042	51.496	41.4938	41.0395	36.1875	29.29	32.0106	22.8425	26.649	25.3822	22.2703	22.2272	39.0889	14.549	32.4774	10.3094	40.1908	17.9725	32.5027	12.162
YPR062W	FCY1	476	14.7907	31.073	838	22.5559	23.1596	18.2116	15.7163	18.4463	19.5563	21.0902	15.7966	14.5882	15.0101	20.4268	14.6392	16.8008	17.6002	15.9654	15.5586	14.9309	15.6743	3.23027	21.8275	2.6909	21.4746	24.3084	22.6442	20.4076	17.8366	12.3185	8.43187	7.57278	7.06834	8.76202	9.75233	8.872	8.02123	6.23355	6.09272	7.63919	2.4684	4.39875	1.37002	6.82298	2.01069	4.49584	1.42944
YOR123C	LEO1	1394	43.2564	31.0304	839	57.9743	76.5552	41.352	54.9114	57.3381	48.0718	73.2783	67.6442	58.6519	40.7335	49.171	54.6866	69.7576	51.8448	71.9931	57.403	58.6056	67.4358	13.2507	45.4368	9.55268	57.6176	66.0152	53.5997	32.5836	45.4545	29.8237	27.6671	22.5449	21.0598	21.3793	17.589	20.9102	15.0535	12.1474	16.0216	19.4948	5.51759	15.3956	3.15104	20.5187	5.4134	14.2982	4.31176
YDL066W	IDP1	1286	39.8516	30.9888	840	62.6346	65.2971	55.3866	50.9823	60.0642	52.118	68.3158	61.248	61.9436	58.4363	55.1033	56.9582	50.1076	45.0755	40.0623	38.5689	40.8802	43.1042	31.7094	47.9982	28.2544	50.5768	57.9946	42.7441	43.2162	36.2486	35.8748	40.5784	35.436	34.6639	53.7404	46.3236	52.1106	34.1726	28.1842	29.9371	13.2446	8.91527	16.7152	9.29898	16.4349	11.3217	16.5093	14.5053
YBL004W	UTP20	7481	231.556	30.9525	841	356.607	381.811	325.553	300.431	281.602	279.375	283.105	250.225	231.914	194.616	226.223	221.775	224.109	185.718	203.683	201.279	178.611	186.815	46.4764	216.048	40.9913	243.731	336.739	300.735	286.993	331.415	290.024	191.759	157.063	124.277	136.804	124.807	127.506	124.933	109.593	98.1229	203.331	68.6505	107.439	21.3722	185.914	45.8747	102.446	14.5756
YCR028C-A	RIM1	490	15.1352	30.8882	842	16.8703	18.5491	14.5359	18.208	19.0824	17.2442	25.8872	21.7082	17.3562	15.2393	13.3324	15.8171	22.2045	19.4319	18.8412	19.3254	18.5238	20.413	4.21913	26.0594	3.54301	24.4083	16.7814	13.5696	13.7194	17.1653	11.454	8.62949	8.38208	9.19852	8.06106	5.16641	5.60684	8.24099	6.76633	5.56619	10.6651	2.904	5.75503	1.31864	10.11	2.53656	5.71193	1.66378
YNL137C	NAM9	1460	45.0723	30.8715	843	72.328	77.1986	62.8216	54.6239	68.5149	53.6593	74.5189	63.6708	58.2778	49.9573	57.3662	51.4896	71.0349	63.3128	67.1341	61.4155	64.6738	66.6156	15.624	47.2187	11.3018	52.4543	64.1643	48.6808	43.3019	40.0844	36.7393	27.1401	24.3948	19.0264	19.6659	15.8475	20.3166	18.7895	15.2908	15.0061	22.4711	7.78271	17.6316	4.31555	23.4073	6.37234	17.2832	4.45236
YPL158C	AIM44	2276	70.2588	30.8694	844	33.8339	104.861	34.5018	86.344	37.8922	75.046	48.3835	93.4226	38.827	70.9829	40.7924	87.3304	45.8828	51.2077	46.0121	63.3808	44.9523	69.6229	67.5061	70.1598	44.8034	79.6789	128.699	97.7008	65.8532	79.4975	63.1051	18.313	15.608	12.6843	23.5212	21.5074	23.4828	12.7461	9.90975	14.0283	49.5059	32.3796	37.7926	24.5233	46.3664	40.8944	40.9048	37.0015
YLR244C	MAP1	1163	35.8984	30.8671	845	33.5542	37.956	25.9808	37.9492	29.5323	31.1166	40.2782	37.214	25.8846	30.9942	27.1541	34.4947	34.0928	39.2619	30.7409	34.8021	32.7361	39.3679	15.4921	40.7595	11.9296	55.036	52.3186	41.7264	40.0436	45.7422	32.9573	15.8098	14.2206	11.3771	15.0317	13.0902	14.7097	8.51569	9.27041	8.65016	36.2118	13.7359	23.1667	8.08309	32.7702	9.28011	21.6316	5.13193
YPR028W	YOP1	675	20.8069	30.8251	846	18.548	26.4834	13.2828	23.7662	19.8094	19.5563	18.0301	22.2896	13.3912	15.1247	10.7638	19.5189	17.7833	36.7135	15.4696	25.5488	19.8013	26.7009	14.1077	39.98	9.0145	36.9645	28.7505	18.6581	17.3208	19.4668	13.5071	9.28823	9.42262	6.43896	5.45193	3.512	5.31001	5.32917	5.06143	3.91138	14.6831	6.96959	8.35762	3.32229	14.3432	5.25873	11.0553	2.46051
YNL084C	END3	1049	32.3338	30.8235	847	41.7564	53.6101	35.5878	42.07	42.7991	37.2822	45.0752	46.0329	38.4529	29.5046	31.3129	38.5331	45.9811	47.7036	47.3013	41.5988	41.6786	42.1929	12.6574	52.2301	9.64238	47.8778	40.3494	34.4328	22.98	25.8918	28.2028	18.6423	16.8798	15.8795	11.1764	8.85256	8.60815	17.416	11.1351	9.02626	16.2209	4.82063	11.2901	3.63054	16.4349	5.3206	11.9029	3.25725
YGR270W	YTA7	4139	127.529	30.8115	848	177.185	238.779	157.722	189.746	174.922	164.446	180.963	177.542	156.206	128.273	119.319	146.981	175.18	164.454	165.406	159.517	163.201	175.333	35.8626	133.86	26.1914	145.863	207.3	160.375	86.0894	97.0464	79.962	76.6114	64.1663	49.8172	52.7279	38.1676	49.736	50.9842	39.266	40.2797	61.808	17.7434	51.3554	11.8678	65.4907	17.8178	56.1611	13.2633
YOL081W	IRA2	9239	284.645	30.809	849	394.542	517.016	349.362	410.637	326.582	319.066	342.903	316.222	250.842	242.683	227.813	276.041	355.469	407.671	325.258	389.211	359.937	385.386	65.9239	300.796	55.1634	318.246	422.497	320.581	208.106	236.862	181.967	163.96	131.454	107.139	118.385	96.1011	104.98	99.9907	91.6918	85.3357	189.74	55.3792	133.905	29.5238	203.743	51.783	160.339	35.0799
YDR074W	TPS2	2690	82.8206	30.7883	850	64.3123	105.397	60.2319	95.8313	68.6058	82.6566	72.3685	89.6431	63.7391	85.7066	47.3974	77.8233	64.8451	156.49	63.465	114.397	75.7721	125.303	50.8933	126.844	35.2059	103.5	192.74	126.197	41.1583	38.8377	27.7706	18.5765	15.1456	13.4589	13.474	10.478	11.8733	13.8998	10.3893	9.77844	27.7293	9.23471	45.637	18.5295	35.4596	12.4663	53.2131	43.2816
YBL051C	PIN4	2006	61.6947	30.7551	851	81.369	92.531	75.5196	83.2774	64.335	62.5223	95.9399	86.5419	79.9731	58.6655	65.9283	70.3354	86.3619	74.7012	85.3802	83.607	87.0301	90.127	21.8867	57.3529	16.549	68.2962	109.82	90.8312	56.4211	48.6191	38.2521	33.8592	29.0772	24.255	31.8938	19.4756	26.0883	20.9321	16.9425	17.7892	35.2197	12.4001	27.0156	8.61397	36.0074	12.4353	28.7439	10.1233
YGL137W	SEC27	2869	88.1393	30.7213	852	136.733	153.11	106.847	114.039	115.221	123.118	111.323	103.404	94.4116	97.1647	95.5287	80.3473	92.8464	100.584	85.8761	90.9768	94.775	97.4174	23.9963	104.126	21.9308	101.74	142.395	110.168	89.948	67.2229	63.3212	52.3698	45.0898	39.5052	42.525	33.4366	35.455	38.2382	27.6514	29.2601	53.8712	20.3861	44.6473	11.5595	61.7056	16.5495	44.9952	13.1462
YBL047C	EDE1	4145	127.263	30.7027	853	161.806	220.552	151.875	191.95	153.386	153.849	194.609	189.462	157.477	135.721	107.577	151.945	163.587	177.356	158.266	179.906	171.106	198.662	39.2907	131.41	29.6447	136.24	200.267	168.093	84.5459	75.9494	65.2663	50.1301	43.1822	37.7139	43.187	28.9377	35.488	38.8425	27.1186	27.6805	56.7483	19.3116	53.0415	15.0873	61.606	19.9522	54.9451	18.6999
YLR196W	PWP1	1730	53.115	30.7023	854	76.1495	82.774	57.2245	61.0446	54.2486	61.1736	82.1279	73.362	54.9862	43.8272	61.0968	62.3428	57.3781	44.0402	59.5976	51.7528	51.1003	53.0373	11.6026	49.446	9.41814	63.1329	55.28	55.3808	75.1996	82.758	60.6198	43.9379	38.9044	37.3266	41.9409	31.8983	38.4893	29.0632	22.4301	24.6718	43.0077	13.3003	23.7532	5.59994	39.4438	11.3527	24.8745	4.31176
YDL195W	SEC31	3821	117.27	30.6909	855	159.569	202.432	136.67	167.513	118.493	151.441	150.94	143.138	107.878	119.852	112.469	117.029	141.971	157.605	127.624	153.457	144.678	160.388	30.325	120.831	25.3841	127.087	182.498	149.604	88.8332	70.5792	67.6435	52.2381	43.3556	38.0528	50.7419	32.9722	41.5896	33.6782	31.1678	24.5213	67.9094	25.0615	60.2628	16.2347	80.1825	21.7773	66.0741	19.3326
YGL252C	RTG2	1766	54.1882	30.6842	856	70.6503	94.8899	63.2393	78.2942	66.5158	61.9443	79.2331	83.6346	55.5846	63.4779	58.834	67.1384	60.9151	68.1708	55.8294	64.1997	60.1226	62.7882	17.2061	62.587	14.3963	66.4187	82.5498	69.1199	48.018	42.29	36.5232	31.6854	27.9788	24.7392	30.2971	23.0167	26.2202	27.0854	18.381	19.1432	28.1757	7.69559	20.3442	4.3498	28.6864	6.99102	21.2263	4.56953
YKR066C	CCP1	1085	33.2846	30.677	857	52.0091	63.5816	45.1948	44.8491	36.8018	49.0352	41.1053	30.5271	25.8098	35.1764	48.1313	28.2688	27.7065	43.881	19.8328	43.8916	26.5083	43.4688	45.6853	42.0959	46.8665	44.1227	34.9202	40.5391	52.1338	33.084	33.6056	15.151	13.7004	15.7343	15.538	16.4861	13.6543	13.7899	11.3483	10.9819	12.1037	7.84079	12.0232	8.87085	11.0562	8.4449	12.9716	13.7086
YHR208W	BAT1	1181	36.2032	30.6547	858	52.5683	48.2491	38.094	33.9243	51.7951	44.122	42.8421	27.4259	33.2909	29.3327	40.0585	25.6607	39.2018	39.9787	36.0957	34.147	35.6105	34.4469	18.8542	40.4254	22.1102	51.2808	78.6012	69.7984	48.5325	43.4407	32.417	51.5793	44.5696	42.8457	79.5202	77.235	79.9799	42.5784	40.4382	41.4079	25.4474	14.2586	14.4792	7.68921	28.4872	16.3639	15.5512	7.63931
YNL307C	MCK1	1127	34.5457	30.6528	859	50.0517	60.365	46.615	48.299	49.7051	45.0854	45.985	46.5175	40.1736	38.9003	33.1476	35.5884	37.4333	41.014	32.03	38.8965	40.2414	40.2792	12.7233	43.3209	9.05935	43.7706	53.1823	43.8466	29.4968	26.5631	20.3147	19.8281	16.7642	12.9748	14.837	11.2036	12.2691	17.1962	13.6925	9.25191	20.3877	6.53399	14.2226	3.76754	21.4152	6.21767	17.0621	4.17116
YIR017C	MET28	563	17.2559	30.6498	860	11.5576	14.1531	9.69057	16.483	9.81381	9.5373	20.7594	16.6688	3.81537	5.15615	20.2433	26.9227	29.1803	31.3777	30.3442	25.5488	36.4089	29.9816	18.5905	11.8047	34.3538	29.6889	12.9562	18.1493	26.0669	24.0698	30.58	14.4264	10.9256	9.82789	10.0861	9.89746	10.0923	11.7022	10.5491	13.3889	11.31	5.14007	8.13768	4.94918	8.16766	5.19686	9.06538	9.18592
YPL126W	NAN1	2690	82.4198	30.6393	861	105.603	120.087	101.166	92.9564	83.5991	93.3499	111.654	96.6207	80.4219	65.8841	90.4526	90.7798	82.3336	67.2151	78.7363	75.7458	68.9055	75.8197	13.5803	64.4802	13.4993	84.9596	115.866	107.708	109.155	112.39	93.4691	52.6333	47.4021	39.7957	64.6443	48.7036	61.1805	37.7437	33.4587	32.6826	77.7809	21.8671	43.291	8.25434	72.5128	16.2093	43.2632	5.64747
YDR529C	QCR7	383	11.7315	30.6305	862	15.1926	18.1202	13.4498	15.6205	17.3559	11.8494	21.3384	14.1491	19.3761	11.4581	12.8432	11.7787	17.3903	18.954	16.1637	15.968	19.4021	22.4178	5.53761	18.4866	4.12604	18.3062	14.5604	9.41388	8.83188	9.97315	8.42842	8.56362	8.20866	7.45564	5.68558	6.47253	5.93666	5.76869	4.79504	5.82946	6.25025	2.4684	4.83862	2.08927	5.87673	2.44376	5.12231	2.48395
YDL134C	PPH21	1109	33.9679	30.6293	863	55.9237	58.6495	48.1187	43.6991	43.7078	46.3378	56.3234	42.2534	36.433	34.2597	35.1047	39.5427	47.6513	45.9516	41.5497	43.3184	45.591	45.6559	12.1959	36.9731	9.28359	39.7808	51.7016	35.7897	29.5825	26.3713	23.7725	18.5765	16.9376	12.7327	14.6034	11.6099	14.4788	14.2844	9.80319	8.19885	18.9988	5.77895	14.7358	2.91128	22.2618	6.86728	16.1777	4.17116
YLR025W	SNF7	722	22.1119	30.6258	864	38.3077	40.6365	29.9071	29.9952	30.441	32.658	37.8797	33.0468	28.8771	20.5673	27.9492	27.764	36.9421	28.2718	30.9392	26.3677	33.7741	32.351	8.04272	31.9617	6.32361	28.5154	33.1927	29.0897	20.2361	17.9325	17.2891	14.8216	12.0818	13.3136	10.2418	8.91061	10.587	12.0318	7.93845	9.10147	6.64709	1.48104	5.16853	1.23301	7.42061	1.67042	5.96989	1.64034
YDL136W	RPL35B	767	23.4263	30.5427	865	19.0141	31.4155	18.5457	24.1495	20.8089	20.7123	37.0527	34.5005	22.1441	20.6246	19.6317	34.9995	25.7415	30.0238	24.196	31.0353	20.7595	32.351	7.31756	28.0639	4.52968	33.9134	27.1464	23.3227	25.5524	27.5221	24.6369	10.6057	12.1974	10.2152	9.73558	8.59134	10.4221	11.2627	6.49994	6.54403	14.6335	7.31807	9.01743	2.53453	14.6918	3.99045	8.80742	2.53082
YDR168W	CDC37	1520	46.3668	30.5044	866	81.2758	78.2708	61.2344	63.2487	67.5154	54.9117	70.7143	66.3843	51.5448	43.6554	54.6141	50.5641	63.1749	62.835	62.7708	59.5321	54.1343	59.2341	15.0966	58.4665	9.82177	64.4238	63.4239	53.3453	40.3008	43.8243	44.4113	35.3085	26.7071	26.24	21.8077	19.7659	20.7123	27.5798	19.7129	17.4884	23.9593	6.24359	15.1024	3.27091	23.9551	6.03207	15.8828	4.31176
YJR076C	CDC11	1247	37.9684	30.4478	867	49.4925	63.6888	38.0104	52.4197	44.0713	45.4707	54.3384	57.7592	38.004	34.6035	32.4137	42.2349	49.3216	42.4475	44.3263	47.4947	44.6329	50.8502	9.62489	48.2209	9.55268	55.9747	55.28	46.7302	37.7284	33.3717	31.8767	19.367	19.4233	16.17	13.3962	10.4489	12.2361	15.1085	9.27041	10.493	19.098	4.55927	11.4734	2.26053	18.8255	5.35153	13.5244	2.95262
YDR025W	RPS11A	809	24.6214	30.4343	868	28.8007	32.5949	25.2289	29.4202	26.3519	28.4192	28.1203	26.1661	23.5655	18.8486	24.3409	30.7928	25.2503	27.8736	17.7504	24.9756	24.8315	28.3413	5.80131	24.8343	4.12604	33.7961	28.1336	24.086	29.9255	28.6728	22.908	13.7677	12.602	11.135	11.1375	12.5387	12.2361	11.1528	8.52451	7.78515	23.7113	10.1349	12.7564	3.73329	21.8136	5.8774	14.6299	4.8273
YOR194C	TOA1	860	26.1634	30.4225	869	38.4942	41.7087	28.7376	35.5534	34.1666	29.4789	45.5715	43.7071	35.0116	27.614	31.1906	38.9537	40.0861	33.6076	48.2929	34.3108	42.8763	43.3776	8.37234	31.6276	6.63755	37.6685	42.3237	31.0404	17.578	22.5355	15.5602	14.3605	14.7987	10.7477	11.6827	9.72331	11.3126	8.90027	5.43438	7.74754	10.0698	2.58456	7.88109	1.76389	8.61588	3.34084	7.73874	2.67142
YMR311C	GLC8	689	20.9554	30.4142	870	33.6474	33.5599	22.3886	31.5285	33.3488	22.5427	44.4136	41.0904	29.7	20.7965	24.5855	31.8865	37.7281	28.5903	36.9882	30.2983	34.333	35.2671	7.77902	25.5025	5.74058	32.0359	30.2312	25.2733	14.4054	14.672	12.6426	11.1327	9.88508	9.24693	8.60625	9.22989	8.97095	6.81255	4.10242	8.23646	6.20064	1.71336	5.82834	1.45564	5.3289	1.82509	4.79065	1.78094
YGR187C	HGH1	1184	35.9992	30.4047	871	48.7468	50.7152	44.6936	44.6574	49.3417	40.6539	51.3609	47.8742	45.8592	32.8847	39.5692	42.908	50.5988	33.1297	51.7636	35.7029	40.5608	39.3679	2.96658	31.1821	4.03635	39.5461	47.5062	32.8214	39.3576	56.962	34.6862	24.2416	22.6605	20.3336	23.3654	16.6022	21.273	19.5586	12.3605	15.0438	33.1362	6.18551	17.6316	2.53453	30.3299	4.17605	17.578	1.80438
YOR014W	RTS1	2273	69.0833	30.393	872	79.9709	109.257	81.0332	102.06	79.7826	82.7529	95.2783	91.872	78.028	71.5558	62.1977	73.0277	83.9056	86.7266	82.802	84.5896	80.2434	86.3907	23.9304	72.8326	16.9526	76.3932	105.007	75.9047	46.2173	46.1258	44.0871	33.7275	30.3489	24.7392	29.3236	18.0534	23.4828	22.6902	18.5408	18.3534	48.3154	17.3659	42.0447	10.7204	48.5079	15.5906	41.9735	12.3729
YHR089C	GAR1	617	18.7363	30.3667	873	24.8861	28.5206	21.0519	20.5079	17.265	19.8453	22.0827	20.1576	15.4111	15.0101	21.1607	20.2761	17.1938	19.4319	14.0813	20.3081	14.0526	19.4106	3.55989	23.1639	3.04968	27.9287	23.0745	22.6442	26.3241	23.2068	19.8824	11.001	10.0585	8.90804	11.7995	10.0426	11.8403	8.18605	7.086	7.07057	14.2863	4.09464	8.24765	1.9009	14.9408	3.46457	8.62317	1.66378
YLR406C	RPL31B	690	20.9325	30.3369	874	24.9793	30.665	17.961	19.4538	20.8998	25.7218	28.6166	28.492	21.3212	20.6819	19.5094	26.7544	20.3378	28.0328	20.527	24.0749	18.2843	26.3364	2.70288	23.498	1.97332	25.9338	18.7557	21.2024	24.7807	25.9877	22.0436	9.68348	8.61331	7.89136	9.03462	8.59134	9.99337	8.90027	7.086	4.85161	17.5106	5.11103	8.24765	1.88377	15.6381	3.37177	8.2178	1.47631
YPL235W	RVB2	1415	42.9175	30.3304	875	63.3802	73.7675	54.4677	60.8529	50.8864	52.7923	63.5188	56.887	46.5325	43.7127	51.5562	47.956	55.0201	51.367	54.3419	48.2316	48.6251	55.2245	12.1959	46.7732	9.91147	55.388	55.8969	45.7973	47.9322	44.112	31.8767	23.2535	23.5855	19.9947	19.0039	15.3831	17.6121	20.6025	12.0409	12.4111	24.9514	7.20191	18.6947	4.52105	25.1006	7.60969	18.1676	4.54609
YLR399C	BDF1	2060	62.4766	30.3285	876	40.1719	88.5639	35.9219	69.5736	38.4374	64.2563	38.7895	72.5867	35.236	56.8322	25.6863	58.725	33.7981	62.5961	30.7409	60.8423	36.0097	65.9777	84.91	86.1963	65.4785	86.9545	114.879	99.0578	49.5614	48.9068	49.2739	16.0733	14.6831	12.5874	12.0332	9.34598	11.6095	13.0208	10.0696	8.61255	42.0156	37.3164	35.7398	26.7153	48.7569	50.7622	37.1091	46.2811
YPL169C	MEX67	1799	54.5442	30.3192	877	83.1399	100.465	74.4336	77.0484	68.6058	63.9673	85.6843	75.6878	58.5023	50.9313	58.9563	66.9701	74.6701	65.702	71.1006	66.2469	70.5822	74.3616	17.7995	54.6801	14.5757	67.0054	79.9585	63.8617	40.3865	49.1945	39.3326	29.7092	24.4526	19.6558	22.275	18.1405	20.9102	19.9432	17.5818	16.6986	35.5173	9.81551	22.9468	5.24031	32.7702	8.93984	23.8795	5.13193
YBR221C	PDB1	1100	33.2802	30.2547	878	36.164	46.8552	32.4968	35.9368	32.9853	33.236	35.8121	37.0202	31.7199	33.5722	30.0286	30.4563	32.9138	40.3769	31.5342	37.095	31.2191	34.1735	9.95451	48.2209	8.02784	46.939	56.5139	43.7618	34.1271	29.2482	28.8511	18.313	15.8392	15.8795	20.2111	17.4149	19.7559	15.3832	12.1474	11.358	22.8184	7.75367	17.2651	5.08618	23.7559	6.00114	18.6835	5.34283
YMR195W	ICY1	383	11.5818	30.2398	879	5.12634	8.04152	5.0959	9.96646	11.4494	15.3175	7.69174	12.5985	14.663	16.1559	3.91411	11.1897	5.30551	9.15846	4.9582	7.20609	5.58909	8.47504	24.5237	24.6116	17.4011	16.6633	28.3803	22.6442	13.5479	10.1649	11.9943	4.61118	4.68241	3.43734	4.43943	5.60179	5.31001	5.32917	4.31553	4.02421	4.56367	2.55552	5.2785	3.33941	4.63166	6.37234	6.78061	9.93579
YMR266W	RSN1	2861	86.3883	30.1951	880	28.3347	55.8617	29.2388	59.2238	26.0793	46.2414	36.8872	73.265	27.1564	60.5561	28.3773	74.1214	33.5033	73.1084	33.4183	66.0012	33.9338	71.1721	54.5191	98.3351	47.0907	109.368	160.164	162.58	126.476	113.253	109.029	18.9058	17.6891	15.8311	36.45	24.2067	32.7506	16.0425	10.9753	13.9531	90.7774	43.7342	56.7805	22.3655	88.4497	46.1531	58.6302	29.2215
YFR001W	LOC1	614	18.5301	30.1793	881	23.5812	28.9495	21.8873	22.137	19.8094	19.2673	36.3083	28.5889	20.4982	18.734	25.4417	24.9876	25.4468	19.4319	26.7743	20.8813	20.2804	21.3243	3.69174	20.4911	3.49817	25.4644	22.7043	24.7644	21.5223	26.2754	24.4208	15.2169	13.5848	13.2652	10.826	11.0004	10.2242	14.1196	8.47124	9.17669	9.82182	2.178	4.14215	0.907635	9.36292	2.04162	4.45899	0.60927
YBL079W	NUP170	4508	136.02	30.173	882	207.57	252.289	189.634	212.458	181.828	176.295	173.932	156.803	130.919	127.93	130.205	130.743	150.519	146.057	134.566	144.531	138.13	150.819	37.9063	127.29	27.4471	152.669	198.786	175.387	124.761	130.13	113.46	83.7917	72.3172	55.7721	60.8669	49.4583	58.0803	56.0937	49.6553	41.9345	97.4245	31.0147	62.7554	13.7515	92.932	26.3555	70.6805	14.2944
YDL031W	DBP10	2987	89.9986	30.1301	883	142.885	142.281	120.297	122.568	109.497	105.777	154.331	116.488	113.264	72.3579	105.131	102.979	116.426	78.6035	104.717	87.947	97.6494	98.3287	19.3157	82.6327	15.9211	105.73	132.154	117.97	101.095	121.212	97.0349	91.0378	72.6062	64.196	61.8015	48.9358	56.2003	54.3905	43.6349	49.7948	65.7764	22.7964	37.2061	8.68247	58.0202	15.5597	34.6769	5.64747
YLR387C	REH1	1298	39.0715	30.1013	884	54.6188	61.6516	38.5117	43.6991	46.7973	39.7869	57.8948	54.5611	41.8194	37.9836	38.7741	51.6578	52.3673	57.0214	44.0288	52.6536	43.4352	52.8551	14.767	37.7527	13.6339	51.8676	55.28	43.9314	37.0424	36.728	31.7687	24.571	22.1403	22.1249	24.5726	18.0244	19.591	14.1196	14.4384	15.307	23.0168	6.44687	16.312	4.17855	24.254	7.57876	15.846	4.05399
YFR030W	MET10	3107	93.4865	30.089	885	89.3847	88.3495	78.36	77.6234	74.0579	60.4992	67.4061	56.9839	40.2484	34.4316	56.6323	63.6889	188.346	226.333	168.182	237.965	189.79	229.099	39.818	58.3551	93.1947	127.087	85.8814	65.1339	107.269	80.5524	98.0074	122.591	101.279	95.8582	190.74	122.165	125.989	80.1024	106.663	100.68	71.4314	30.4339	63.7818	27.0407	60.5104	20.8184	59.6252	30.1589
YBR191W	RPL21A	870	26.1717	30.0825	886	27.8687	36.5621	20.4672	31.6243	25.7158	29.9606	30.188	30.8178	20.6479	22.5725	19.9987	26.9227	24.8573	26.5993	23.4027	28.4149	23.3943	29.0703	4.35098	24.1662	4.21574	29.4542	28.3803	26.6303	31.5547	32.125	26.9061	11.7914	13.2379	11.3771	11.6827	12.1904	10.7849	11.4824	7.086	7.10818	27.5805	11.7902	13.6361	3.87029	26.2461	7.33129	13.8192	4.42893
YLR449W	FPR4	1178	35.4175	30.0658	887	39.0534	54.8967	36.0055	41.7825	39.5278	35.2591	62.7745	53.2044	42.4179	24.2912	40.9147	47.7036	45.6863	33.3686	45.318	34.9659	39.6027	43.0131	5.86723	31.5162	4.84361	48.4645	48.6168	48.7656	38.1571	55.4277	35.5507	24.7686	20.5795	21.4471	19.5101	15.5573	18.4366	14.3393	13.1064	14.3292	23.2152	6.38879	13.5628	2.96266	21.6642	5.2278	12.382	2.78858
YGR281W	YOR1	4433	133.273	30.0638	888	86.4021	156.542	79.446	143.939	90.6869	147.009	81.0527	148.371	68.9758	166.486	62.3811	149.421	80.2704	178.232	73.4806	166.805	84.5549	173.784	61.9026	137.424	49.1986	117.817	196.935	185.903	106.24	103.088	94.1174	29.775	25.4353	21.6407	30.6866	21.1301	29.9801	20.9321	19.7662	18.6167	93.2577	51.9815	90.0643	43.361	95.4719	52.711	102.52	66.3636
YDR404C	RPB7	515	15.4674	30.0339	889	20.8782	24.7679	17.7939	16.3872	21.5359	22.061	23.8196	19.2854	16.0844	16.4424	17.0019	15.3964	18.9623	22.7767	14.5771	16.7869	20.2804	18.317	4.74652	19.3775	4.43998	19.0103	20.4832	18.3189	16.8063	11.4116	11.9943	6.71915	6.35882	6.48738	5.3351	5.54374	5.21106	7.30701	3.46308	4.06181	11.2604	2.70072	6.34153	1.42139	11.6539	2.8459	6.96487	1.87468
YPL063W	TIM50	1430	42.9425	30.0297	890	57.415	70.8726	48.2022	62.482	43.4352	52.0216	61.6993	56.2086	48.2532	43.4835	49.2322	47.5353	57.7711	51.1281	51.4661	54.7826	54.0545	51.2148	8.30641	51.896	7.7139	57.8523	56.8841	46.5605	45.0168	37.4952	35.9829	21.8702	20.1748	18.3486	16.8231	14.1061	15.93	16.7567	16.1433	12.9376	21.8759	6.38879	18.768	3.69904	25.0508	5.75367	18.6835	3.91339
YML108W	YML108W	317	9.51426	30.0134	891	13.0489	12.2231	9.27287	9.10398	12.1764	8.38126	18.5263	17.7348	12.269	9.45293	13.8217	14.3027	14.3445	10.1141	13.6846	9.49893	9.5813	9.84198	1.84587	9.91147	1.65939	13.495	9.37785	8.98983	11.49	15.4392	12.7507	11.9232	10.4632	8.95645	6.26971	7.77865	8.27834	8.29593	5.96716	8.87582	7.29196	1.8876	3.22575	0.582257	5.77712	1.05175	3.46401	0.187468
YHR205W	SCH9	2474	74.235	30.0061	892	104.298	127.914	93.8983	108.769	94.8668	93.3499	109.504	102.048	85.8083	75.3943	72.6557	84.9746	91.9622	88.0008	87.5619	91.3044	88.9464	96.7795	19.7113	68.0439	15.1587	78.6228	110.807	92.4426	60.7084	61.1814	53.0558	44.2673	39.3669	31.8075	44.4721	33.2914	40.6001	29.9423	25.2006	25.6496	45.1407	12.6614	33.1006	6.5247	49.1553	13.085	35.8562	8.55322
YDL153C	SAS10	1832	54.9558	29.9977	893	83.0467	92.2094	68.0011	59.8946	65.7889	60.8846	88.3309	74.5249	64.8612	40.0461	68.4358	61.0808	73.8841	41.4918	69.1173	50.5245	52.8568	55.1333	9.88859	47.6641	9.0145	66.536	78.6012	67.5934	70.7408	88.4158	69.9127	53.2921	39.5981	35.3901	45.8351	34.4815	37.5988	34.9418	21.8973	28.019	40.825	12.8066	22.5436	5.17181	36.9537	9.89878	21.7422	3.44472
YLR452C	SST2	2096	62.8157	29.9693	894	62.0753	67.0126	53.2146	51.4614	54.5212	49.2279	45.8196	41.7688	35.5353	26.2391	28.9277	41.646	106.7	139.129	103.329	115.625	112.66	123.572	48.7178	53.4551	40.498	65.1279	54.5396	39.6061	39.6148	41.1392	37.6037	17.5225	13.5269	12.6843	37.5015	26.7609	30.9366	9.99907	14.9179	7.33383	82.0469	66.5015	52.9682	35.8773	75.6006	80.273	54.7608	46.2342
YJL158C	CIS3	683	20.4678	29.9676	895	7.08367	21.444	6.68315	15.4288	6.81515	17.8222	7.36091	16.8626	7.33149	12.7185	6.97201	14.0503	12.0848	20.945	13.1888	26.7772	9.50145	26.7921	14.0418	30.4026	12.2884	31.6838	33.1927	24.3404	28.2963	24.4534	17.6132	2.96433	2.94818	2.80797	6.6202	5.36959	7.78362	2.52724	2.29096	1.2035	16.1217	9.03143	11.5467	5.94244	18.8753	13.3324	14.5931	11.7167
YLL018C	DPS1	1673	50.1289	29.9635	896	79.8777	91.03	61.6521	70.7235	75.2392	71.0962	81.5489	58.7283	64.0383	49.499	66.1729	55.9486	70.5436	59.0123	63.7625	65.2642	66.111	68.7116	12.3937	48.4437	11.1224	58.087	67.7427	56.144	51.7051	41.5228	42.1421	34.0568	32.8925	28.7575	34.3082	27.8928	33.4761	24.3384	22.217	22.8289	26.2411	9.64127	23.6066	8.18584	28.3378	8.56864	24.9482	9.91236
YDR069C	DOA4	2780	83.2465	29.9448	897	99.7306	120.837	84.1242	110.877	93.3221	92.4829	99.579	117.747	75.4096	96.3053	69.9036	109.626	81.5476	105.123	77.7446	95.0712	89.1061	102.794	43.2461	85.3054	32.4702	97.6331	148.565	114.832	65.3387	62.3322	64.5099	34.1886	25.0884	22.6574	38.3582	26.877	35.2901	25.2174	22.9096	20.121	43.3549	17.9757	39.4787	14.5735	42.3822	15.5906	40.1309	13.9898
YBR039W	ATP3	935	27.9867	29.9323	898	37.4689	45.1397	28.4034	34.3076	34.3483	31.9837	39.3685	36.5356	30.5977	22.5725	23.24	30.2039	41.3633	41.0936	34.9057	40.6161	39.7624	42.0107	10.2841	31.8503	6.63755	29.8063	33.6862	21.1176	18.3497	21.7683	18.9099	18.313	16.1861	14.766	10.5144	8.53329	9.2348	14.614	10.8688	9.47757	20.0405	8.62487	15.5056	5.00056	23.5069	8.87797	19.0152	6.42077
YGL167C	PMR1	2852	85.3632	29.931	899	112.686	132.524	105.009	121.802	108.315	98.6484	125.053	110.867	99.4988	93.7846	75.4689	95.912	96.3834	95.6461	91.2309	89.1753	91.1022	98.1464	25.3807	85.8622	17.2217	94.6994	122.652	94.054	71.4267	68.949	59.9715	50.5253	45.3211	36.3099	37.1899	27.4865	35.1582	33.1288	31.1145	30.2003	68.1079	21.7509	47.0299	11.7136	69.3753	18.7768	52.5129	12.162
YHR068W	DYS1	1163	34.7968	29.9199	900	39.1466	50.8224	32.5804	40.6325	33.9849	37.5712	43.4211	45.5484	31.6451	30.5931	33.2699	43.4128	36.9421	38.6248	29.1542	36.5218	33.7741	41.7373	10.0864	43.2095	8.11754	46.3523	46.5191	41.6416	37.9856	32.0292	28.9592	18.1153	14.5097	15.1049	20.25	15.238	18.4036	16.5919	10.922	10.4554	26.0923	9.96071	16.5686	4.22992	27.4911	8.3521	17.5411	4.87416
YBR207W	FTH1	1397	41.7626	29.8945	901	43.5273	60.9011	38.6787	55.103	47.9786	48.3608	74.6016	85.9604	43.0912	56.8322	53.9413	78.4964	32.5208	33.1297	31.8317	34.8021	32.7361	32.9889	14.3055	60.8052	12.5575	65.2452	53.6759	42.5745	42.3587	36.8239	34.4701	18.3788	19.7123	14.0398	27.6491	18.5468	23.2189	15.4381	14.0654	16.5105	20.8342	5.74991	11.84	2.55165	20.4191	4.82566	14.4456	2.95262
YER125W	RSP5	2429	72.5939	29.8863	902	94.7907	122.231	83.6229	95.0647	83.7809	89.1111	92.4662	82.5685	74.5119	69.7225	65.8671	66.9701	83.4144	97.1593	74.4722	85.8179	85.1937	86.4819	20.1068	82.1872	15.1139	78.7402	105.377	86.5059	58.136	55.5236	50.1383	30.5655	29.4818	24.4003	28.4279	16.8634	25.8574	20.3827	19.1269	17.1499	49.4563	16.8432	44.3174	10.121	53.3886	12.8066	48.9015	13.4977
YDR303C	RSC3	2657	79.3958	29.8817	903	134.124	135.634	113.363	132.631	121.764	104.429	125.549	105.44	107.129	81.8681	77.7929	91.9577	108.272	85.7709	101.841	86.7187	94.8548	81.5609	29.468	98.5578	21.7963	93.5259	123.393	82.9439	59.4222	69.9079	59.5392	40.7101	36.0141	30.8392	25.3904	17.3568	24.3403	32.03	26.6924	20.0458	52.6311	15.1879	34.5302	7.79196	49.5538	13.6418	39.2465	7.33468
YGL092W	NUP145	3953	118.005	29.852	904	152.485	185.92	138.341	152.468	133.94	140.362	140.023	128.408	112.89	103.409	103.969	115.936	133.031	125.511	119.79	131.921	119.846	126.397	30.3909	125.063	24.8011	134.011	196.195	160.121	108.126	114.212	103.518	68.3113	55.4952	50.495	65.4231	48.036	57.5196	45.1057	40.7046	39.7155	85.8665	27.9364	63.0854	12.7069	87.5035	23.819	66.0004	15.7473
YJL123C	MTC1	1436	42.8514	29.8408	905	59.7452	74.1964	46.1137	53.3781	49.6143	49.4205	70.8798	62.7017	51.8441	44.2856	52.4735	48.8814	61.1116	51.7652	55.4327	52.8173	54.1343	63.8818	10.8774	49.8914	8.38663	60.1993	66.0152	58.5187	36.6995	41.5228	26.69	23.7805	19.4811	17.6224	21.574	17.3859	21.1081	17.5808	12.84	14.1787	20.5365	4.64639	15.0657	2.50028	21.4152	3.65018	14.2614	3.25725
YOL097C	WRS1	1298	38.7256	29.8348	906	57.2286	57.7917	45.1948	47.724	50.7956	40.9429	58.5564	44.87	44.737	32.6556	44.0337	42.6556	49.3216	47.9425	46.0121	41.2712	46.2298	48.1164	6.39462	44.7686	5.47149	49.1686	49.1103	47.4086	45.4456	41.1392	38.4682	24.9662	22.6027	17.4288	22.8591	18.8951	20.9762	21.5914	15.6638	15.0438	30.3583	8.16023	19.1712	3.59629	26.9433	6.49608	18.573	3.70249
YOR362C	PRE10	866	25.8347	29.8323	907	30.1988	37.956	23.6416	26.8328	23.535	29.7679	36.8045	37.8924	23.2663	26.3536	26.6649	31.2976	30.6541	37.2709	25.5843	32.3455	26.8276	36.8163	7.25163	36.639	6.18906	35.5563	35.0436	30.7011	28.6393	24.7411	18.2616	10.6716	10.8678	8.95645	11.3322	9.22989	11.0158	8.51569	6.18027	5.79185	12.7981	3.22344	8.43093	1.72964	13.9946	3.80485	9.28649	2.74172
YKL007W	CAP1	806	24.0291	29.8127	908	36.8164	44.1747	26.9832	30.9535	29.714	31.1166	37.4662	34.2097	28.129	24.463	26.0533	26.1655	34.3876	38.6248	28.7576	31.6904	35.371	35.176	9.95451	39.4231	7.8933	34.6175	28.6271	25.9518	20.0647	16.59	18.3696	12.5161	11.6771	10.2152	6.46443	6.38546	5.93666	11.3176	9.48352	6.84491	10.0698	2.87496	7.51453	2.1064	9.76135	2.8459	6.92801	2.41365
YHR066W	SSF1	1361	40.5739	29.8119	909	57.415	62.4022	42.438	45.9032	48.2512	45.2781	78.158	61.248	59.1756	33.0566	53.0851	61.838	56.9851	28.9885	60.7876	43.4822	46.2298	47.2962	7.51533	26.5048	5.78543	44.0053	45.2852	42.4897	50.3331	68.949	42.6824	32.41	27.6898	26.5789	32.2832	24.8743	29.7163	24.4483	15.6105	20.6476	34.0787	9.98975	17.9615	3.56204	29.9315	7.33129	16.3251	2.36678
YGR119C	NUP57	1625	48.3934	29.7806	910	80.9962	90.4939	68.6694	70.9152	64.0624	65.027	78.8196	67.838	57.829	48.1813	64.8274	57.9678	62.3889	56.3842	70.3073	58.5494	63.6358	65.5221	18.0632	49.446	14.0375	64.1891	71.938	58.858	45.9601	44.3997	37.2796	30.4997	26.6492	21.3018	24.4168	22.1169	24.2084	23.0198	19.1269	17.1123	23.3144	6.21455	17.1551	4.2128	22.3614	7.76436	16.0671	5.1085
YDR324C	UTP4	2330	69.3871	29.7799	911	96.6548	112.045	90.4732	85.4816	83.8717	80.8262	100.075	81.9871	75.9333	48.6396	77.2425	75.3834	81.8424	56.8621	73.5797	64.8548	64.3544	66.0689	10.3501	55.1256	7.8036	72.1687	96.3698	79.0427	85.3176	98.389	74.343	53.2921	47.2865	38.6822	43.3428	33.2624	39.3139	39.8314	28.9301	32.0808	69.9433	17.5401	35.1167	5.58281	61.0084	11.2599	33.7925	3.60875
YGL202W	ARO8	1502	44.7264	29.7779	912	58.9063	68.7282	51.3767	59.1279	54.2486	62.0406	59.797	50.6847	44.8867	52.8791	47.8867	46.4416	49.7146	55.5082	45.2188	52.6536	44.4732	52.3083	11.6685	56.0165	10.7187	55.036	67.1257	52.8365	47.0748	39.7967	37.6037	21.8043	18.5562	19.5105	33.1399	26.4126	28.6938	15.9875	14.2786	14.254	21.6774	9.32183	20.894	7.72346	24.9512	7.39315	21.3368	8.92815
YDR322C-A	TIM11	290	8.63165	29.7643	913	10.9983	14.0458	10.693	10.6373	12.8125	11.8494	17.782	13.6645	9.27658	9.73939	9.41833	9.67533	14.148	16.5649	13.6846	12.4469	14.0526	14.3073	2.63696	12.1388	2.24241	10.0919	9.74803	7.12402	5.65926	7.86344	5.72701	7.50963	6.76347	6.68103	3.69952	4.00542	4.05671	6.15327	3.88931	4.58835	4.11723	1.07448	2.41931	0.822009	3.88462	1.29922	3.3166	1.10137
YKL195W	MIA40	1211	36.0316	29.7536	914	52.1023	64.3321	40.266	49.449	44.1621	40.9429	56.985	54.9488	43.2408	31.7962	35.3493	42.8239	54.7253	50.0928	53.8461	54.1275	51.2599	60.9656	12.1959	45.2141	10.3151	51.2808	53.3057	48.4264	27.0959	27.9056	26.2578	15.2169	14.6253	13.12	14.175	12.6258	13.0936	12.4714	9.90975	8.72538	13.7902	2.99112	10.1171	2.05502	11.4048	3.86671	9.24964	2.60112
YDR052C	DBF4	2114	62.8979	29.753	915	88.3595	108.292	70.006	100.335	81.3274	78.9958	98.2557	89.5462	82.4418	57.7488	55.4091	82.5348	93.7307	74.303	92.1234	77.2198	86.3914	95.2303	16.9424	55.571	13.8581	75.5718	101.799	80.23	45.1883	51.8796	42.7905	37.2847	29.0772	23.1899	27.4543	22.0008	24.868	22.0858	16.9425	18.3534	30.7056	8.94431	25.7327	5.36019	31.575	8.6305	23.7321	5.06163
YDR245W	MNN10	1181	35.1262	29.7428	916	47.0691	50.6079	38.8458	42.3575	37.1653	38.5345	45.9023	46.7113	29.4008	37.2961	36.0832	38.6172	36.5491	37.3506	29.7492	38.4052	33.1353	39.9147	10.8115	43.9891	8.52117	49.99	51.825	43.5074	38.2429	37.3034	26.2578	19.3011	15.7814	14.9597	16.5115	15.3251	16.5897	16.3721	11.9876	11.3204	26.886	7.17287	14.6625	3.73329	24.503	5.93927	15.7354	3.28069
YML008C	ERG6	1151	34.208	29.7202	917	16.4975	44.6036	12.6144	29.9952	11.4494	28.9009	26.6316	60.182	17.9547	39.4159	24.5855	45.5161	12.969	34.0057	14.6763	30.2983	12.6952	34.9026	10.0864	51.0051	8.43148	47.291	54.7864	38.334	34.0413	30.9743	25.1772	7.97075	7.28374	7.55247	9.57981	7.34327	11.0158	6.53785	6.39338	4.17464	24.7034	10.5705	14.9191	3.73329	28.7362	9.55851	16.3251	5.36627
YMR083W	ADH3	1127	33.458	29.6877	918	30.1056	42.1375	22.4721	35.6493	24.7163	39.7869	31.3459	36.6325	23.5655	37.468	24.769	31.9707	17.292	31.8555	16.0646	28.333	17.406	27.5211	11.1411	57.4642	10.8533	51.5155	47.8764	48.5112	53.2485	33.9471	39.5488	23.5829	19.6545	19.8978	36.0606	33.1173	34.3007	20.3278	18.8605	20.6852	19.3956	6.06935	12.1332	3.99017	21.714	6.21767	14.0771	4.66326
YBR172C	SMY2	2222	65.9319	29.6723	919	107.374	117.192	94.0654	91.0398	96.6842	81.6932	108.015	94.9732	88.3519	61.931	85.1319	83.8809	79.5826	59.7291	88.4543	69.9318	88.627	86.573	16.2173	44.88	12.7818	60.786	105.007	94.1388	65.596	65.4008	51.6511	44.5967	35.6672	31.6623	49.1452	38.3998	45.7782	28.6237	29.1432	28.7712	44.1982	12.4581	31.561	7.43233	42.3822	12.4972	28.3754	9.06875
YJR137C	MET5	4328	128.411	29.6699	920	77.5476	88.3495	73.8488	72.2568	66.1524	65.7977	61.2031	40.509	42.2683	32.5983	48.7429	48.7132	296.519	395.884	256.736	417.462	315.784	416.644	54.585	69.2689	169.885	146.684	90.0768	77.4313	145.512	116.897	143.175	158.69	122.494	120.113	272.441	200.068	193.502	109.88	141.667	145.436	102.98	40.714	75.9883	31.4076	78.2402	30.1604	68.6905	35.2674
YML053C	YML053C	638	18.9221	29.6585	921	28.3347	33.131	30.5754	31.816	28.351	24.4694	37.9624	24.7124	26.1091	10.656	18.6532	26.4179	33.8963	25.7233	41.1531	27.0228	39.2035	39.4591	6.19685	18.8206	4.26059	25.4644	25.7891	20.1847	17.921	14.672	17.3971	11.3962	12.6598	9.53741	7.16539	6.12423	6.16753	9.83425	5.11471	7.86036	6.05183	1.33584	5.57175	0.804884	6.87278	1.85602	4.9012	0.890472
YDL100C	GET3	1064	31.4737	29.5805	922	43.6205	51.5729	33.0816	41.495	35.0753	35.3554	48.3835	44.9669	35.7597	28.8171	27.3988	35.0836	43.6231	47.7036	37.0874	42.9909	38.4849	45.8381	8.96565	40.5368	7.48966	41.0716	42.2003	29.6834	27.8676	27.618	22.908	19.6963	19.8858	14.9113	14.9149	10.2167	12.467	16.7017	11.1884	11.9222	18.8003	6.73727	11.6567	2.80853	17.2816	5.13499	13.7455	4.35863
YLR208W	SEC13	893	26.4072	29.5714	923	39.1466	45.0325	31.8285	35.0743	31.8949	36.3188	37.3835	32.2715	25.735	28.7598	30.2732	30.288	35.8613	37.1913	28.9559	33.1644	29.4625	28.159	12.0641	36.5276	7.26542	37.0818	33.3161	31.4644	28.8108	23.9739	17.6132	15.8098	17.111	14.1851	12.6173	10.1877	12.3021	13.4053	12.6802	8.49972	13.9887	3.83328	8.39427	2.75716	15.14	4.33072	9.02853	2.78858
YDR145W	TAF12	1619	47.8665	29.5655	924	77.6408	85.8834	68.0846	70.3402	69.6054	58.2835	92.4662	74.1372	68.3773	44.973	56.0819	66.1288	78.3054	63.6314	89.0493	64.3634	81.3612	79.556	14.3055	44.1005	11.7054	61.7248	74.6526	55.3808	38.5859	40.3721	31.5526	29.775	24.9728	22.2701	22.0024	17.4149	19.2941	21.7562	18.008	16.8866	21.5782	5.57567	15.6522	3.52779	19.2737	6.43421	14.7405	3.93682
YDR412W	RRP17	707	20.8657	29.513	925	24.9793	32.3805	23.7252	24.3412	25.0797	19.9416	38.9549	34.5974	26.5579	18.9632	28.3773	27.0068	30.8506	21.2635	33.3191	21.5364	26.109	29.2526	4.61467	22.4957	3.40847	27.9287	25.6657	23.5771	26.9244	31.9333	18.9099	16.2709	16.4751	13.8946	9.15145	10.1297	9.56461	12.9658	8.57779	11.5461	11.9052	2.11992	7.84443	1.14739	9.86095	2.72217	6.44895	1.24197
YHR098C	SFB3	2789	82.2911	29.5056	926	93.2062	124.912	82.8711	110.973	81.0548	95.5656	91.3083	99.7219	72.6416	76.9411	65.1944	84.8064	90.4884	100.663	84.7853	95.1531	83.517	104.799	16.6788	93.3237	13.1405	101.858	123.023	90.8312	67.5681	72.4971	57.8103	33.991	35.0891	27.6924	31.6212	23.5681	28.331	32.4695	20.7252	20.4971	62.1552	16.3495	41.5315	8.22009	60.2116	12.6519	47.1695	9.16249
YGR284C	ERV29	932	27.4818	29.4869	927	38.6806	51.4657	40.0154	43.6991	34.3483	36.2225	44.3309	39.9275	27.6053	32.7129	31.6798	36.4297	32.7173	40.775	31.2367	35.5391	33.7741	33.2623	6.13092	34.4117	5.02301	37.0818	38.1284	23.7467	23.0658	19.275	21.2872	15.8098	12.5442	10.5541	8.41154	7.80767	7.55275	11.0429	9.5368	7.93558	13.443	3.36864	7.69781	1.31864	12.2017	2.35096	9.10223	1.54661
YML117W	NAB6	3404	100.292	29.463	928	126.294	175.627	109.186	140.201	111.768	126.008	121.827	123.174	99.3491	110.571	81.6459	106.849	101.394	126.626	94.2058	122.995	104.117	140.248	27.688	120.497	24.2181	126.618	168.678	134.423	75.1138	67.0311	56.4056	39.3268	33.2971	28.6122	42.1745	31.1436	35.7519	30.0521	22.6432	24.3709	50.3988	13.0389	46.7733	9.89836	51.1973	13.3015	46.801	12.2088
YIL109C	SEC24	2780	81.9	29.4604	929	88.9187	127.914	82.0357	122.281	88.0517	96.1437	102.722	102.726	77.8784	84.9045	74.735	82.9554	85.8706	101.141	72.6872	100.64	84.5549	99.3311	19.3157	83.0781	17.4908	98.8066	130.92	90.492	70.312	65.0173	51.7592	34.2545	33.0081	24.9328	33.062	25.3967	33.707	25.2174	19.6064	20.6099	55.8058	17.8886	42.0813	8.7681	54.7333	14.6935	46.4693	12.2323
YOR182C	RPS30B	602	17.7267	29.4463	930	23.954	24.0173	15.3712	16.5788	19.9002	20.5196	28.2857	25.5846	18.1791	19.4788	19.8152	27.0068	21.4185	22.936	23.0061	23.3379	21.3982	22.9646	4.54875	20.2684	4.35028	23.2348	17.892	15.6898	16.8063	17.3571	16.8568	8.76124	6.76347	9.29535	9.34616	10.4199	9.79548	7.63665	6.18027	4.70117	15.7744	7.25999	7.03799	1.88377	13.646	3.89765	6.92801	1.52318
YML072C	TCB3	4637	136.411	29.418	931	149.782	218.515	140.346	179.971	158.929	166.855	156.895	150.503	127.553	116.185	98.4032	126.705	137.452	170.586	121.873	165.74	138.689	170.777	30.3909	150.677	25.2944	167.22	242.343	180.39	105.468	113.732	83.2037	55.0706	50.0035	39.6989	64.2159	47.9199	55.7716	38.8425	31.0079	30.426	86.2137	30.9566	72.9092	17.4848	94.4759	26.3864	78.4192	20.7152
YDL205C	HEM3	983	28.832	29.3306	932	38.401	41.0653	30.4919	31.4327	33.4396	32.8507	41.6015	36.2449	32.6176	31.5098	34.3708	37.9441	37.0403	36.9524	36.5915	33.7376	32.8958	35.9961	19.1839	26.3935	16.863	31.0971	39.2389	38.1644	25.0379	29.2482	24.9611	14.4923	13.4691	11.7644	15.3433	16.9795	16.2928	9.28485	7.19256	9.36474	21.7271	9.46703	12.7564	6.5932	21.4152	10.27	14.3719	8.03768
YDR208W	MSS4	2339	68.5567	29.3103	933	89.1983	108.614	76.6056	94.873	77.7835	86.7027	95.7745	85.9604	67.4796	62.6758	60.791	75.72	81.8424	72.5509	72.9847	81.0685	85.034	85.8439	18.2609	62.587	13.1854	78.2708	113.151	94.1388	55.8209	61.9486	50.1383	35.572	31.5629	27.5471	39.176	25.9482	31.5632	27.7447	22.9096	20.8356	46.232	12.1968	35.1533	6.7302	47.7111	10.6721	37.5882	6.81914
YLR403W	SFP1	2051	60.0751	29.2906	934	64.7783	79.5574	56.0549	73.0235	60.882	68.4951	77.0001	88.2863	69.1255	61.8737	46.4801	79.6742	65.0416	67.9319	67.6299	80.1677	75.293	88.8512	18.7883	49.446	14.7102	59.1431	95.0125	70.4769	46.9033	44.3997	43.3307	25.4274	22.8918	19.801	38.8644	26.2094	34.5315	19.0642	18.3277	19.3312	43.2557	16.9593	32.9173	8.88798	42.9798	11.5692	33.8293	7.87365
YNL302C	RPS19B	985	28.8475	29.2869	935	37.4689	38.8137	26.8997	31.1452	27.7149	38.2455	31.0151	32.5622	25.5106	26.3536	28.5608	30.6245	28.3943	33.3686	23.9977	33.6557	26.5881	32.351	6.065	28.9548	5.38179	34.6175	30.2312	29.3442	34.2128	32.3168	27.2303	13.1748	13.5848	14.1851	13.1625	13.5836	12.7308	12.6911	10.7622	7.86036	29.2174	13.6778	15.2856	4.17855	27.1425	9.03264	16.0671	4.71013
YOR058C	ASE1	2657	77.7246	29.2528	936	102.9	116.87	92.4781	103.594	101.682	84.6796	102.556	103.598	75.0355	82.8994	71.4937	102.222	84.9864	85.4524	80.8187	83.607	80.8023	94.4101	32.105	80.6281	25.8775	90.7096	122.282	103.213	56.0781	90.046	70.3449	95.4514	70.5829	68.7468	70.6803	59.2106	56.827	72.9053	64.5732	93.9859	53.3751	17.7725	33.2838	9.69286	45.3703	17.1373	31.8394	10.4982
YDR251W	PAM1	2492	72.8514	29.2341	937	95.3499	120.408	76.0209	101.102	87.143	90.8452	86.5113	93.6164	71.3698	70.5819	57.8554	78.4964	87.2461	112.37	83.9919	99.575	91.182	108.9	19.052	76.619	12.6024	78.7402	112.781	85.149	50.1616	44.3038	51.3269	30.1044	24.0479	22.8511	27.7269	18.8661	22.0646	23.4593	17.7416	15.3446	38.196	9.08951	37.8659	7.43233	42.9798	8.78517	39.3939	7.63931
YDR361C	BCP1	851	24.8772	29.2329	938	28.5211	32.8094	23.8923	23.1912	22.7172	23.1207	36.7218	33.6283	26.7824	22.2287	25.931	31.2135	31.3418	28.2718	27.4684	29.1519	26.4284	28.888	5.86723	23.8321	3.8121	36.7298	26.6528	22.2201	31.7262	34.7142	35.5507	17.8518	14.5097	13.8946	15.1875	11.6389	14.0171	14.9986	12.3605	10.7563	21.479	4.96583	10.7769	1.35289	18.427	4.23792	10.6868	1.28884
YDR170C	SEC7	6029	176.158	29.2184	939	254.08	321.875	227.144	257.211	244.709	222.73	215.865	208.069	208.499	164.424	150.938	181.728	207.897	215.104	199.121	204.8	200.888	215.157	47.7289	194.443	35.4301	202.19	288.739	212.872	134.965	154.871	128.479	108.89	89.8328	68.4079	85.0111	66.757	81.0354	65.2137	56.2618	55.3234	108.338	39.3492	82.1832	22.434	110.413	31.3049	84.8682	25.4956
YHR023W	MYO1	5786	169.056	29.2181	940	248.954	323.376	235.999	262.29	226.808	213.77	246.218	257.494	218.299	168.262	161.763	228.338	215.757	195.513	212.806	203.654	187.953	222.994	31.8413	168.94	21.572	195.266	262.58	219.827	113.614	136.747	122.32	102.236	81.3929	70.3445	69.7457	59.8782	61.9721	69.3891	55.1429	45.1689	81.4516	21.083	61.6558	10.4464	84.9635	17.1373	60.0674	10.0295
YPL218W	SAR1	711	20.7734	29.2171	941	27.7754	36.3477	23.1404	26.2578	27.2606	32.2727	28.6993	25.6815	21.0967	24.7495	21.283	19.4348	23.2853	28.5107	19.337	22.4371	24.3525	20.5041	8.04272	36.1936	5.87512	30.9797	23.0745	17.386	19.5502	20.234	15.236	12.1208	13.2379	13.5557	8.45048	6.76278	7.05802	12.5812	7.77862	7.70993	14.5839	5.66279	7.14796	2.20915	13.2973	3.77391	7.9967	2.06215
YLR309C	IMH1	2735	79.874	29.2044	942	137.945	152.574	110.773	135.793	135.031	103.562	152.181	133.447	130.022	78.2015	82.1351	104.073	138.926	95.3276	137.342	102.441	119.447	115.097	24.7215	93.9919	18.7466	105.143	121.048	86.93	46.1316	67.3188	48.0852	75.0305	57.345	49.4299	41.9019	28.9958	31.2664	47.1934	31.5407	39.4146	32.9874	9.11855	24.9629	4.91493	32.8698	9.03264	22.9583	6.39734
YHR010W	RPL27A	971	28.2918	29.1368	943	33.6474	39.1354	24.1429	33.0618	32.2584	33.0434	41.6842	42.9318	27.0068	26.2391	31.9856	40.2157	30.4576	34.7225	29.8484	33.6557	29.5423	35.0848	7.05386	31.8503	6.4133	33.5614	29.2441	25.2733	28.4678	32.125	21.6113	12.9113	15.7814	12.0065	13.8635	13.1482	15.4023	10.8232	9.48352	8.4245	24.2073	14.9846	12.0232	3.33941	24.9014	7.08382	13.4507	3.98369
YJR073C	OPI3	620	18.0463	29.107	944	8.76138	28.4134	9.02225	21.2746	10.7225	35.6444	19.8496	40.1213	21.9197	37.5826	13.0878	27.6799	1.965	2.07061	1.18997	1.71963	2.07595	1.91372	11.4708	41.5391	4.75392	21.1225	49.7273	39.8606	19.8074	15.8228	9.94122	1.44923	1.38738	1.30716	1.36298	0.609521	1.05541	1.53832	0.532782	0.564141	0.446446	0.11616	0.403218	0.154127	0.747042	0.185602	0.515916	0.0468669
YLR192C	HCR1	797	23.193	29.1004	945	26.1909	36.4549	24.6441	29.9952	22.0811	22.928	41.9324	38.5708	27.4557	26.7547	29.417	33.4851	32.3243	26.8383	26.7743	25.467	28.9834	30.0727	4.74652	32.2958	4.35028	36.7298	28.257	23.1531	17.6638	25.6041	15.7763	11.3303	13.4691	9.82789	12.3058	10.6231	11.1477	9.12003	6.18027	8.12363	12.4013	3.7752	7.9544	2.02077	11.8033	3.15524	8.77057	2.71828
YDL004W	ATP16	482	14.0164	29.0796	946	19.3869	22.1946	13.784	18.4954	17.9011	17.9186	17.203	16.9595	12.1194	10.656	13.0878	13.0407	16.8008	21.821	13.5855	19.5711	14.6115	18.8638	3.62582	24.3889	3.63271	16.6633	14.8071	13.0607	13.3764	11.7952	11.5621	7.57551	10.5788	8.81121	4.94568	3.512	4.02373	10.3836	5.27454	5.71663	8.43287	2.64264	5.38846	1.31864	9.26332	2.78403	7.70189	2.06215
YJR002W	MPP10	1781	51.7862	29.077	947	73.1669	78.4852	65.4113	59.5113	58.7011	59.5359	79.8121	72.1021	59.9985	46.9209	65.1332	58.3044	58.7536	42.2085	60.1926	45.2018	46.5491	50.2123	11.273	46.105	8.87996	54.8013	80.0819	68.187	64.7385	74.7986	58.3506	42.884	33.2971	32.2916	34.3861	29.1409	34.4986	30.7664	23.6555	23.7315	36.311	11.1223	23.8632	4.4868	35.4596	7.91903	22.1475	3.02292
YMR033W	ARP9	1489	43.266	29.0571	948	66.9221	71.1942	54.4677	66.9861	63.1537	52.2143	72.6166	63.9615	52.5922	45.1449	46.9693	54.4342	58.7536	56.3046	59.2009	50.852	57.6475	55.6801	17.7335	43.655	13.5442	50.6941	55.28	44.6099	41.587	35.9609	27.8786	26.9425	24.7994	22.7542	18.926	13.3514	15.6662	20.2728	17.2089	15.1942	28.6222	9.11855	19.6477	4.88068	26.5449	7.05288	19.3837	4.78043
YNL247W	YNL247W	2303	66.9057	29.0515	949	90.9693	101.216	70.3402	90.0815	78.6014	71.3852	97.5941	84.8944	73.4645	55.5145	65.8671	76.0565	84.9864	73.3473	76.9513	77.056	73.6163	81.3786	20.6342	63.0325	16.1005	85.0769	92.9148	79.6363	67.9111	76.6206	59.7554	40.3808	36.2453	29.9678	41.9409	29.7504	34.0368	26.0415	23.6022	23.882	49.5059	17.7144	32.3308	8.64822	48.4083	15.3741	34.3821	10.1233
YOR047C	STD1	1334	38.751	29.0487	950	48.0012	53.1812	36.3396	45.6157	42.3448	41.6173	55.579	49.9094	43.0912	33.3431	33.698	51.4896	43.7213	42.6067	42.1447	43.8916	52.5374	56.2269	21.8208	37.9754	16.0557	45.5308	67.3725	62.3352	31.9834	39.6049	32.417	16.6002	13.9316	13.7494	20.0553	15.5283	19.1952	12.0318	9.90975	10.3802	24.8026	12.6324	17.9982	6.62745	21.3156	12.3116	17.5043	8.20172
YGL026C	TRP5	2123	61.6419	29.0353	951	90.2236	95.5332	88.1341	77.3359	80.1461	79.7665	83.4512	62.7017	68.1529	73.4464	77.2425	65.2874	72.3121	70.7989	55.5319	68.6216	62.6777	65.8866	17.1402	75.0599	17.8945	78.9749	92.5446	75.4807	83.6027	56.8661	53.0558	46.507	42.6619	36.8909	66.3188	51.1127	54.7821	35.711	36.389	33.51	32.2433	10.4544	28.8118	9.52161	35.2604	9.00171	31.5446	11.5293
YCR002C	CDC10	968	28.1033	29.0324	952	44.4594	43.4242	32.1627	36.6076	37.8922	38.4382	40.6091	36.0511	27.1564	30.4213	31.6798	34.1581	33.4051	33.6872	30.84	29.1519	34.7322	30.7106	10.6797	43.5436	7.48966	43.3012	34.3032	28.8353	31.8977	26.1795	22.6919	20.1574	19.828	18.0581	12.6563	10.5941	11.8073	19.9432	13.2663	11.0196	16.5681	4.58831	10.2271	2.27765	15.6879	4.23792	11.129	2.60112
YLR435W	TSR2	617	17.8953	29.0037	953	23.1151	26.4834	21.1355	18.9746	18.5372	16.7625	32.9173	27.7167	22.4433	16.4997	24.5855	22.4636	26.5275	20.8654	25.386	22.6828	19.3223	22.1445	4.6806	16.2593	2.33211	28.2807	21.5937	19.2518	16.3776	25.3165	12.7507	15.5463	13.4113	12.4906	12.5394	10.1877	10.4551	9.72437	7.93845	9.25191	14.9808	3.80424	8.5409	1.45564	12.6997	2.90777	7.11227	1.10137
YGR189C	CRH1	1523	44.1389	28.9816	954	36.3504	73.8747	32.2462	55.3905	29.8958	53.3703	42.594	64.2523	35.0116	62.3321	31.3129	50.48	31.6366	40.4565	22.7086	41.7625	24.592	40.826	30.8524	52.5642	20.9441	61.8421	60.4625	46.6454	48.8754	44.5915	35.3345	17.3907	18.2094	15.3954	16.4337	13.3804	15.5672	12.0318	10.6024	8.95104	24.1577	12.7776	17.8149	9.07635	29.7323	18.22	23.4373	16.5206
YDL015C	TSC13	932	27.0064	28.9768	955	29.2667	39.457	27.3174	32.8701	29.8049	30.7313	24.2331	28.2012	22.3685	27.9578	25.6252	21.9588	24.6608	32.9704	24.196	29.07	24.3525	26.7009	8.04272	42.5413	6.05452	36.8471	42.3237	33.5847	24.1805	27.7138	19.3422	14.0312	10.4632	12.297	13.4351	10.9714	13.2915	9.01015	7.61878	7.82275	22.6696	8.27639	10.8136	3.54492	22.0128	5.72274	14.7773	3.16352
YDR457W	TOM1	9806	284.1	28.972	956	495.018	575.558	451.53	437.949	454.07	411.645	404.271	334.248	355.577	296.249	282.978	279.491	376.593	373.267	349.454	340.488	347.322	342.465	107.192	292.221	79.9645	294.425	397.942	314.644	228.343	235.04	190.828	182.603	154.808	131.539	125.862	108.524	115.336	135.317	111.618	92.5943	170.146	70.5671	127.454	35.1923	183.573	62.7335	132.664	42.3443
YKL135C	APL2	2180	63.158	28.9715	957	92.0877	111.08	80.3649	98.7063	86.3252	76.491	96.188	92.3566	78.1776	56.0874	57.1215	68.7369	90.2919	81.789	83.4961	74.5994	87.8286	88.669	18.5246	56.6847	14.1721	76.7453	93.1616	68.187	53.077	54.3728	39.8729	43.2133	36.939	31.6623	31.5433	21.9137	26.4841	33.2387	25.5203	24.1828	39.0889	12.5162	26.979	5.97669	39.4936	11.8785	30.1074	7.12378
YKL142W	MRP8	659	19.0623	28.9261	958	16.8703	24.339	15.0371	19.0704	19.0824	17.5332	21.0075	28.7827	15.4859	20.2808	14.3721	24.2304	20.436	31.8555	20.6261	25.7945	21.5579	27.43	8.24049	38.7549	6.95148	33.092	28.5037	24.0012	12.6905	14.9597	12.3185	6.38978	6.06979	5.90642	4.16683	3.77322	3.66094	6.37303	3.46308	3.87377	5.8038	2.20704	5.42512	1.45564	7.42061	2.53656	6.04359	2.39021
YJR065C	ARP3	1349	39.0142	28.9208	959	53.5936	66.9054	43.8582	57.1155	49.2508	50.8656	57.1504	50.2001	40.8469	37.3534	34.7377	39.5427	45.9811	55.3489	41.7481	43.8916	50.0623	48.2986	14.701	54.346	12.6024	50.9288	61.4496	43.7618	34.813	28.2892	26.7981	18.7741	16.5329	14.1367	13.3183	8.30109	10.8839	14.1196	11.0819	10.1169	20.3381	6.96959	16.8252	4.40117	21.465	7.23849	18.4256	6.53794
YKL086W	SRX1	383	11.0759	28.9188	960	7.36329	21.0152	4.84529	15.2372	6.26993	13.5834	15.4662	17.0564	6.43375	14.9528	11.62	20.3603	3.14401	9.47701	3.27241	9.41704	4.79065	14.1251	19.3157	15.3683	29.1962	21.2399	10.7352	14.3328	9.26061	13.2336	8.86065	2.17384	1.96545	2.37225	3.89423	2.40906	3.16622	1.04386	1.75818	1.95569	2.52986	1.71336	2.60259	2.08927	2.63955	3.61924	2.76384	4.00712
YDL051W	LHP1	827	23.8907	28.8883	961	32.0629	33.8816	26.0643	28.7494	27.5332	25.9145	38.8722	28.5889	25.9595	18.5621	25.6252	26.5861	28.4925	24.7677	23.9977	23.993	24.9114	26.5187	4.54875	25.7253	4.61937	32.8573	27.023	25.3581	34.1271	32.4127	25.0692	17.786	15.2034	12.3938	13.3572	13.9029	15.1055	16.7017	14.4917	9.47757	23.2648	5.83703	9.64059	2.07215	20.0207	4.51632	9.76555	2.08558
YLR129W	DIP2	2831	81.767	28.8827	962	123.685	125.984	104.007	99.4729	93.5038	97.2997	107.519	99.1404	85.8083	75.1078	96.4461	80.3473	81.1546	69.6043	79.8271	71.7333	77.2093	76.002	14.2396	64.2575	12.6472	85.8984	132.524	111.779	95.6072	106.54	83.0956	61.3946	53.761	48.5585	56.8558	43.6823	56.794	40.9302	35.1103	32.2313	68.6039	21.1411	41.6048	8.11734	68.8772	15.9927	38.8043	6.49107
YKL014C	URB1	5294	152.855	28.8733	963	261.257	263.44	231.154	231.337	208.816	197.104	225.542	193.92	183.212	133.945	157.971	166.836	182.451	124.555	167.885	140.109	141.963	141.251	39.818	120.608	26.5502	161.235	228.4	186.073	165.062	193.23	170.081	120.681	111.337	83.5613	84.7774	69.8627	79.6831	78.619	71.1797	69.2013	125.65	43.1244	68.987	14.8475	111.857	34.7076	66.9585	12.2088
YJL039C	NUP192	5051	145.577	28.8215	964	224.627	272.018	195.9	220.412	198.73	189.783	173.767	162.327	150.37	140.705	117.851	138.147	164.864	159.676	148.845	147.807	152.183	151.822	43.312	157.247	35.2059	165.343	205.696	154.439	129.048	141.542	120.375	88.7981	78.3869	62.7436	61.7625	48.1231	55.5077	65.1587	49.2291	45.8459	112.008	39.5815	75.1086	16.2861	112.604	32.8516	76.3187	18.1844
YJL122W	ALB1	527	15.1826	28.8094	965	21.1578	18.4419	16.2902	13.9914	16.9016	16.5698	28.8647	19.8668	14.8874	11.5154	21.2218	19.5189	19.1588	13.22	21.1219	15.7224	16.6076	16.1299	2.57103	15.9252	3.00483	24.4083	17.1516	19.6759	29.2395	25.0288	18.6938	10.0787	11.1568	10.6025	9.07356	8.79451	10.3562	11.3726	6.6065	6.95774	9.72261	2.14896	4.36209	0.85626	9.66174	2.50563	3.86937	0.703004
YGL070C	RPB9	368	10.5843	28.7618	966	16.2179	15.3325	13.3663	10.9248	14.8116	13.3907	17.9474	14.5367	11.6705	11.8591	14.9837	13.2089	13.0673	13.8571	12.098	13.7571	14.851	12.0291	3.88951	15.5911	3.67756	12.5562	13.5732	11.6189	13.4622	12.3705	11.0218	6.98264	6.87909	6.43896	4.67308	6.06618	5.63982	6.48291	5.00815	3.9866	5.55578	2.20704	3.62897	0.753509	5.92653	1.76322	2.39532	0.867038
YLL051C	FRE6	2138	61.4794	28.7556	967	51.2634	80.5224	43.8582	84.5232	50.3412	68.2061	100.572	120.849	64.562	96.6491	76.6921	111.561	42.2476	42.4475	40.8556	44.3011	39.3632	50.5768	20.3705	69.603	21.1235	78.6228	84.0305	69.7136	71.5125	58.9758	63.1051	24.571	20.5795	18.6391	47.5096	32.769	45.1186	20.3278	16.3031	20.3843	33.3843	8.88623	21.1506	4.0073	32.4216	6.86728	24.4692	3.79622
YER180C-A	SLO1	257	7.38491	28.735	968	8.20215	13.0809	7.43501	8.43316	11.3586	8.76661	11.3308	9.20659	9.12695	7.79151	8.07285	9.92773	8.94076	9.55665	8.92476	7.61552	8.70301	7.47262	1.58217	7.12735	1.12121	8.21432	13.203	12.5518	7.37419	8.34292	5.51089	4.87467	4.33556	3.43734	4.01106	2.90248	3.62796	2.96676	3.19669	3.64811	4.31565	1.04544	2.12606	0.308253	3.5858	0.58774	2.35847	0.328069
YER042W	MXR1	554	15.9085	28.7157	969	14.5402	20.1574	11.6955	16.2913	6.72428	10.597	15.1353	17.6379	2.54358	5.61447	15.473	24.4828	22.008	36.4746	19.932	35.0478	24.2726	32.2598	6.72424	9.91147	13.3199	21.0052	7.03339	12.5518	20.7506	12.1787	20.2066	8.62949	7.34155	9.24693	13.2014	13.5836	10.0923	7.41689	6.65978	7.93558	12.054	5.16911	6.12159	3.25379	10.11	3.89765	6.26469	3.58532
YDL161W	ENT1	1364	39.1523	28.704	970	48.0944	63.0455	41.1849	57.3071	53.4307	44.7964	85.9324	75.1064	56.632	44.6293	46.2354	64.2778	60.2274	44.757	56.226	51.589	58.2862	68.985	11.2071	38.4208	8.11754	48.2298	52.6887	44.8643	29.1538	30.8784	27.5545	23.517	19.4233	18.7359	17.4851	13.4965	14.8416	15.6029	11.0286	13.4642	14.4351	3.3396	12.2432	2.27765	14.0942	3.37177	10.9448	2.85888
YKL077W	YKL077W	1178	33.7819	28.6773	971	42.8749	54.4679	33.8335	41.9741	37.2561	44.7964	47.0602	43.1256	35.0116	35.9784	34.2485	37.9441	37.9246	39.899	35.6991	36.7674	34.6524	39.3679	7.77902	37.9754	6.09937	41.541	47.5062	40.7935	33.8698	26.9467	25.8256	19.0376	15.2034	14.9113	17.0957	10.6521	15.8311	14.1196	11.0286	12.4111	24.9018	7.31807	16.4953	3.52779	25.2998	5.53713	15.7354	3.21039
YLR170C	APS1	470	13.4757	28.6718	972	16.4043	21.8729	14.6194	16.6747	16.5381	12.5237	25.5564	25.2939	18.1043	16.0413	18.4085	20.0237	17.1938	17.9984	17.6512	16.705	17.8851	17.7702	3.69174	19.4888	3.18423	21.3572	16.7814	12.8911	10.5468	13.7131	9.40093	8.69537	6.59005	6.5842	4.55625	4.03445	4.65038	6.15327	4.58193	4.88922	5.60538	1.7424	4.1055	0.85626	6.17554	1.60855	4.12733	1.12481
YMR216C	SKY1	2228	63.8163	28.6428	973	84.6312	96.2837	73.7653	81.0733	70.1506	73.6973	75.7595	73.6527	62.3925	66.8007	70.6374	69.7465	66.2206	71.2767	60.3909	68.7854	70.2628	71.81	16.6788	57.687	13.9927	65.7146	107.228	88.4565	66.7107	61.8527	59.7554	32.937	29.3084	25.2233	41.201	32.9431	37.368	24.1186	21.0982	21.5502	45.2895	12.371	31.561	5.89107	43.2786	12.621	31.9868	7.73305
YLR223C	IFH1	3257	93.214	28.6196	974	130.395	152.574	117.122	124.581	126.943	100.768	153.504	129.764	130.994	80.7796	103.54	122.077	128.904	79.1609	133.177	97.2822	116.892	116.828	30.9183	74.2803	21.2132	109.016	139.927	124.077	97.6651	122.746	85.3648	87.7441	65.8427	57.9023	92.3323	65.1026	79.2873	49.9404	47.2578	54.1951	59.8734	20.0666	39.4054	9.62436	55.2313	18.0034	40.5363	8.92815
YNL271C	BNI1	5861	167.695	28.612	975	244.2	320.696	237.168	243.603	229.352	225.138	233.233	210.201	193.761	170.955	164.698	179.877	216.936	204.273	219.153	206.438	214.062	220.624	43.7735	170.277	31.3938	183.297	273.562	223.558	132.907	136.651	122.752	90.445	79.0806	68.6016	69.7068	58.485	62.6977	62.4118	51.52	46.5604	85.6185	28.5753	67.7407	15.8579	90.6909	23.6333	69.7224	17.9266
YGL225W	VRG4	1013	28.9807	28.6088	976	29.2667	42.8881	28.3199	36.3201	25.6249	35.3554	24.7293	26.1661	22.5181	28.1296	21.6499	23.0525	22.794	29.8645	16.7587	24.5662	21.0789	27.5211	13.0529	49.3346	9.32844	38.1379	41.3366	28.5809	33.4411	28.6728	25.9336	13.2407	12.313	13.4105	12.9289	8.50427	12.1701	13.1306	11.3483	6.76969	26.3403	9.61223	15.4689	5.25743	25.2002	8.6305	20.0102	4.42893
YLR206W	ENT2	1841	52.6527	28.6	977	69.159	95.8549	67.6669	75.0359	64.335	64.9307	101.564	98.462	87.6038	56.603	57.3662	71.7657	79.3861	72.9491	77.5463	70.5869	82.0798	91.1295	18.4587	53.121	14.8448	65.9493	81.5626	64.0313	32.9266	31.6456	25.2853	19.8281	19.6545	14.8145	16.5505	14.9187	15.0725	12.6911	11.3483	13.0129	18.1555	4.50119	17.9615	4.36692	21.1164	5.9702	18.0202	6.56137
YER117W	RPL23B	884	25.2821	28.5996	978	33.3678	35.8115	24.9783	24.9161	28.9871	36.6078	27.2933	29.0734	22.8174	26.1818	29.9062	23.4732	22.794	27.8736	18.742	26.6134	20.2804	22.3267	4.87837	28.6207	6.00967	31.6838	24.4318	26.8847	34.47	25.4124	26.7981	13.4383	14.0472	13.1684	13.3962	13.5256	15.5672	11.7022	8.68435	8.12363	26.9356	11.7031	11.3268	3.27091	25.7978	6.37234	13.6718	3.79622
YNR035C	ARC35	1028	29.3932	28.5926	979	34.7659	44.9253	31.5779	38.8117	36.2566	34.5847	47.2256	42.0596	37.3307	27.4994	29.417	34.3264	40.0861	41.014	37.8807	39.6335	43.1957	43.1954	11.273	42.6527	8.79026	48.5819	40.3494	28.6657	21.3508	26.2754	22.6919	14.9534	14.4519	14.2335	10.5144	7.80767	8.90498	10.7133	9.11057	8.16124	14.7823	3.45576	10.3004	2.29478	13.0981	4.70192	11.2027	2.55425
YGL117W	YGL117W	797	22.7725	28.5728	980	15.0994	22.5162	12.5309	19.8371	18.0829	21.3867	19.1053	24.9062	19.6005	36.9524	15.2895	34.074	23.187	33.2094	22.7086	36.1123	18.8432	36.2695	12.2618	20.7138	11.2121	26.2858	20.113	25.2733	27.0959	19.3709	32.6331	10.2763	10.6944	11.3287	21.3793	18.4017	16.4247	10.8232	13.4261	9.89127	6.89511	4.03656	14.8458	9.28186	10.3092	7.26942	14.8879	12.9118
YOR187W	TUF1	1313	37.4401	28.5149	981	47.2555	52.109	43.6076	57.403	47.5243	51.8289	55.0827	48.165	42.7171	44.171	41.7709	39.2061	47.6513	54.7118	40.1614	45.9388	46.2298	50.3946	9.88859	54.5687	7.22057	47.4084	55.8969	39.3517	29.754	25.2206	21.6113	20.0257	20.3482	16.7994	17.0957	10.8553	14.9406	16.9215	12.9999	11.6589	21.2806	5.25623	14.4426	3.20241	22.8097	6.00114	16.6567	4.14772
YMR109W	MYO5	3659	104.323	28.5112	982	142.419	174.233	130.572	156.397	135.394	131.788	132.827	128.892	111.319	101.977	91.3088	107.775	132.736	142.713	116.617	121.111	121.523	128.948	39.1588	125.508	27.0435	128.261	167.814	122.55	79.1439	78.8262	69.5885	51.9746	45.8991	39.1663	37.9688	28.2411	32.6846	39.1172	29.676	27.3796	57.3932	20.3861	50.0724	12.1075	63.1001	20.045	54.5765	15.138
YNL213C	RRG9	644	18.3583	28.5066	983	22.2763	24.2318	21.3025	23.1912	19.9002	16.7625	30.0226	30.3333	21.6952	21.5412	23.607	30.8769	18.6675	22.4581	20.6261	20.0624	19.482	24.5138	9.62489	22.3843	8.29693	25.9338	26.7762	22.9834	19.7217	19.9463	14.6957	9.15648	9.94289	8.95645	11.1375	9.69428	8.50921	10.933	5.96716	8.31168	7.7384	2.178	5.09521	1.35289	7.91864	2.87683	5.67508	1.64034
YNL055C	POR1	851	24.2508	28.4969	984	15.8451	29.5928	12.5309	19.4538	16.629	25.9145	19.0226	26.8445	17.805	30.2494	12.4762	21.8747	19.65	39.4212	15.8662	36.0304	19.482	32.2598	14.701	39.4231	11.4363	33.3267	44.4214	30.4467	17.8352	16.2064	14.5877	11.4621	12.1974	9.92472	25.3904	20.8398	25.0659	10.7133	7.56551	9.17669	11.4092	6.82439	9.60393	6.4562	15.0404	8.38303	15.6249	11.3184
YOL038W	PRE6	764	21.7641	28.487	985	27.3094	39.1354	18.8799	20.0287	22.7172	29.9606	27.6241	32.9499	20.2738	19.0777	19.6317	23.4732	23.973	28.9089	22.5102	26.5315	21.6378	32.1687	11.1411	31.4049	8.20723	34.0308	27.8868	29.5986	19.8074	21.7683	16.5327	9.8811	9.19139	9.34376	8.87885	8.53329	9.03691	7.19713	6.97945	5.56619	9.37537	3.10728	6.74474	1.67827	9.81115	2.7531	7.22282	2.06215
YER161C	SPT2	1001	28.4723	28.4439	986	41.2903	49.643	28.7376	39.9617	41.6178	34.3921	51.9399	46.8082	41.8942	30.3067	37.3064	39.3744	46.6688	36.156	43.6322	35.3753	40.481	40.2792	8.37234	29.0662	7.22057	36.8471	45.9021	32.1429	26.3241	25.9877	18.8019	17.3249	14.9143	15.1533	13.7077	9.86843	14.248	12.7461	9.00402	10.305	11.558	3.68808	8.90746	1.93515	11.8531	3.77391	7.81244	2.76515
YJL179W	PFD1	329	9.35406	28.4318	987	19.0141	15.4397	13.8675	13.7997	15.3568	9.44096	22.9098	16.6688	15.4859	9.91126	13.8217	12.4517	16.0148	10.353	19.7336	13.3476	13.6533	13.8517	3.16435	12.4729	2.01817	16.0766	10.7352	9.75312	7.63143	9.20598	7.67203	8.16837	7.16813	6.43896	4.47837	4.26664	5.31001	5.93351	3.56964	4.85161	3.8196	0.987359	2.0894	0.393879	4.03403	1.08268	2.54273	0.585837
YLR225C	YLR225C	1223	34.7629	28.4243	988	42.8749	69.9076	40.6837	53.6655	44.7982	52.407	37.8797	49.3279	38.9766	37.869	28.3161	37.3552	34.1911	42.2085	32.3275	38.7327	35.371	40.6437	32.3686	47.1073	25.4738	48.9339	43.8044	34.4328	25.5524	25.1247	24.0966	24.9662	24.1635	21.4955	13.8245	12.5968	14.3139	20.7673	10.4425	11.8094	17.6594	9.35087	12.6464	6.23357	19.7219	13.1778	15.3301	9.63116
YLL048C	YBT1	4985	141.655	28.4163	989	223.136	248.858	206.927	203.258	225.354	185.447	190.97	154.089	160.545	138.872	144.577	144.625	173.412	175.922	149.44	158.206	163.601	160.843	39.3566	141.211	31.4386	137.179	200.02	165.125	132.392	122.938	103.194	86.2949	76.8839	63.3245	79.5202	56.163	66.5895	59.445	56.7413	47.5007	103.625	41.8176	83.3562	25.2425	102.942	37.1204	84.3154	26.597
YDR300C	PRO1	1286	36.522	28.3997	990	52.1023	56.5051	43.7746	47.4365	43.8895	40.8466	67.9023	56.887	42.4927	36.7232	40.3643	53.8453	52.2691	44.2791	51.5653	46.0207	47.4274	45.4736	8.70196	34.9685	7.13088	41.6584	43.0641	35.3657	39.2718	35.9609	32.9573	22.463	19.8858	20.2367	20.3279	13.9609	17.1174	16.7017	14.0122	15.7207	25.2986	6.47591	14.4792	2.67153	22.9093	5.84647	14.6299	2.83545
YPR133C	SPN1	1232	34.9582	28.3751	991	50.9838	62.7238	50.5413	48.1073	48.3421	41.521	64.8422	61.5388	52.8166	34.8899	46.1131	48.2925	50.4023	45.1552	50.2762	41.7625	51.4196	50.668	14.1736	36.9731	11.526	45.4135	48.37	43.7618	30.44	32.4127	21.1791	20.6186	20.8685	17.8161	18.4976	15.3251	17.6451	14.8887	11.6679	13.3137	15.328	5.37239	10.9969	3.11679	15.7875	5.5062	10.65	3.77279
YHL047C	ARN2	1862	52.6348	28.2679	992	14.0741	49.3213	14.3688	77.815	15.1751	44.122	79.4813	149.244	46.6821	111.144	58.8951	126.452	9.62852	7.48604	8.8256	6.79665	10.2999	7.746	33.753	106.687	30.6314	119.108	65.2748	49.02	77.772	55.8113	56.8378	8.1025	8.09305	5.80959	33.2178	25.3386	32.3218	7.14219	3.94259	6.58164	10.6155	4.26888	5.46178	1.95227	11.3052	4.67099	5.63822	2.43708
YML048W	GSF2	1211	34.2017	28.2425	993	47.3487	60.2578	41.0178	44.7532	36.2566	40.9429	39.2857	36.8263	27.1564	32.9993	37.551	31.0452	35.2718	42.6067	28.1626	38.8146	36.0896	39.1857	22.8756	53.7892	20.9441	48.1125	49.7273	40.115	37.3854	24.7411	26.69	16.3367	14.9721	15.7827	15.6938	13.3514	15.1715	15.4931	10.8688	10.0417	22.4711	12.5453	14.0027	6.76445	23.9551	7.51689	14.8142	5.48343
YOL076W	MDM20	2390	67.4298	28.2133	994	108.212	115.583	95.1514	99.6646	86.8704	90.4598	88.4963	87.0265	73.0156	63.1914	64.4605	67.3066	76.5369	73.2677	72.8856	71.5695	61.8792	77.1867	23.9304	71.1621	18.3429	82.3779	97.9739	77.9401	67.4824	69.812	64.4018	42.0276	33.4127	31.4202	28.7394	23.0167	26.5171	29.6126	22.217	18.6543	43.3053	14.7233	28.6652	7.24396	38.9458	12.1879	31.5446	6.88944
YPR173C	VPS4	1313	37.0439	28.2132	995	53.9664	59.9361	46.1137	54.528	46.1613	51.9253	55.6617	48.165	43.166	37.8117	47.8867	48.1242	42.3458	42.6864	45.913	39.961	45.2716	53.0373	10.6797	39.3118	8.07269	40.7196	57.1309	47.1542	30.6972	30.8784	29.8237	21.3432	17.2266	17.4288	16.3947	13.9029	16.4907	14.614	10.336	11.9222	21.1318	5.28527	15.1024	2.74003	19.9709	5.5062	15.2195	4.8273
YIL128W	MET18	3098	87.2397	28.16	996	137.106	162.653	131.073	153.426	141.755	124.178	128.361	114.065	110.496	83.816	82.5021	87.4986	123.893	108.627	110.171	96.2995	101.881	106.53	28.4132	94.1032	21.1235	92.5872	121.542	94.3084	62.1661	72.4012	67.1032	68.2454	64.9178	50.0109	39.3707	28.9667	36.1806	46.3144	40.4914	38.1359	56.4507	18.2371	37.9392	8.45985	54.8329	18.189	42.084	10.8263
YLR378C	SEC61	1442	40.6038	28.158	997	51.2634	72.2664	51.9615	54.2405	42.163	59.2468	54.0903	46.1298	33.4406	48.3532	41.037	40.9729	39.4966	49.8539	34.4099	43.9735	44.9523	46.9317	8.43826	51.1164	6.95148	45.1788	53.7993	39.5213	42.9589	31.4538	28.3109	15.6121	17.6891	14.0883	17.2515	12.3646	16.2928	12.1967	11.295	9.25191	26.3899	6.53399	21.004	5.10331	26.8935	5.5062	24.2481	5.78807
YKR001C	VPS1	2114	59.4867	28.1394	998	78.3864	100.465	69.0871	85.769	74.3305	75.046	82.9549	76.9477	65.1605	61.7592	58.467	61.4173	72.8034	77.8867	67.8282	68.5397	67.628	79.0092	20.6342	74.0576	15.6969	72.0514	92.5446	68.187	45.8743	44.3038	36.4151	31.356	29.5396	21.8828	22.8202	15.6153	19.1952	19.9981	12.6802	15.2694	35.0212	12.4291	27.8954	7.56934	36.5054	10.7031	31.2866	7.63931
YHR081W	LRP1	554	15.5743	28.1125	999	18.1752	23.1596	17.4597	19.7413	20.3546	15.6065	28.6993	27.4259	23.7151	14.4372	22.8119	22.716	20.9273	15.211	20.7253	15.231	18.7634	19.2283	4.28506	17.2615	3.31877	21.4746	19.9896	21.0328	19.3787	24.9329	14.4796	11.2645	10.0007	10.07	9.61875	7.6045	7.88256	11.867	7.72534	7.48427	7.29196	1.452	4.32543	0.822009	6.57397	1.14455	3.94307	0.796738
YNL175C	NOP13	1211	34.0367	28.1063	1000	37.8417	43.7458	31.912	37.9492	34.7118	33.9104	52.5188	57.0808	35.5353	28.5307	35.9609	51.9102	32.1278	23.1749	37.484	30.7896	26.7478	36.2695	5.80131	31.2935	3.45332	49.99	43.6811	38.1644	42.1872	60.702	45.2758	25.8885	22.7183	20.5756	20.0164	19.3886	20.6134	18.6246	15.2376	16.0968	23.2648	5.28527	11.4367	1.67827	19.6223	4.17605	11.0185	1.31227
YFR009W	GCN20	2258	63.4521	28.101	1001	83.8856	95.5332	69.0035	83.9483	81.0548	72.2522	89.0753	69.4855	65.9086	60.0404	65.7448	60.6601	71.0349	69.9228	67.0349	67.4752	68.5861	69.8963	14.5033	69.1575	11.0775	83.082	104.02	85.4034	64.9958	65.4967	56.6217	41.1054	34.6845	30.3067	32.1274	23.1618	30.9036	25.6569	22.1637	20.7228	44.099	15.0717	30.3513	6.26782	44.2747	10.3009	31.2866	6.46764
YDL022W	GPD1	1175	32.9742	28.0632	1002	7.27008	29.0567	7.51855	22.712	10.5408	25.7218	9.09775	22.3865	7.92998	27.213	7.33896	19.7713	10.9058	50.5706	12.098	38.6508	15.1704	44.5623	30.3909	72.053	24.532	53.1584	57.3777	49.9529	30.783	20.0422	26.1497	1.11986	0.635882	0.629372	3.89423	2.32198	2.86938	0.769159	0.58606	0.676969	18.4531	6.24359	22.6169	9.86411	23.9551	14.9719	32.2448	30.3698
YGL068W	MNP1	584	16.3626	28.0181	1003	22.3695	25.9473	18.0445	20.2204	21.0815	23.7951	33.1654	21.5143	20.1242	21.6558	22.6284	22.6319	22.794	21.5821	19.337	22.3552	25.3106	23.7848	5.99908	20.157	4.79877	23.1175	23.0745	14.5025	13.5479	14.0008	10.8057	9.55173	8.26647	7.55247	6.03606	6.03716	7.02504	6.53785	3.24997	3.87377	8.87932	2.14896	5.31515	1.16451	8.01825	2.6603	4.16418	1.47631
YBR112C	CYC8	2900	81.2508	28.0175	1004	91.8081	123.196	83.79	112.218	81.1457	80.0555	127.286	128.601	87.9779	72.4152	68.4358	107.522	106.208	96.6018	103.031	111.285	116.812	139.428	15.624	73.8348	11.9296	99.1586	135.732	105.249	57.7931	64.0583	46.0322	33.2005	29.713	21.3502	28.6226	21.5364	28.9577	17.7456	17.3687	16.7362	41.966	8.10215	34.3835	5.70269	43.7766	8.4449	37.3671	8.06111
YMR080C	NAM7	2915	81.6241	28.0014	1005	122.193	135.955	108.852	123.143	103.499	112.424	113.639	99.9157	88.8756	83.415	90.8807	87.2462	90.2919	83.3021	81.1162	86.7187	87.3495	82.9278	21.4912	74.7258	16.4593	87.8933	120.308	99.397	78.3722	70.5792	78.0169	47.2316	47.5756	44.1529	47.5486	39.3286	46.4049	38.7876	31.3276	32.7202	54.6649	20.7636	40.0652	10.6176	62.4029	16.8279	41.4944	10.8731
YGR214W	RPS0A	1213	33.9632	27.9994	1006	43.8069	48.9996	31.2437	39.3867	34.7118	44.2184	44.1654	43.9009	30.4481	33.4577	37.3675	37.2711	37.2368	32.8112	29.8484	36.0304	28.7439	36.9074	6.98794	34.5231	7.48966	38.2553	42.5705	34.1783	34.6415	34.6183	28.4189	13.3065	13.6426	14.7176	16.4726	13.1773	17.9419	12.2516	11.295	9.32713	30.2095	14.8685	20.1609	6.8672	31.6746	10.2081	20.1576	8.03768
YPR029C	APL4	2498	69.8567	27.965	1007	98.7054	124.268	88.6353	103.115	97.4112	86.799	95.7745	87.511	81.0952	68.0038	60.9133	77.1502	95.6957	92.0624	87.4627	84.6715	92.6991	88.4867	24.9192	82.0758	17.446	82.2606	106.735	75.311	55.9924	51.7837	48.9497	40.5125	36.5343	30.2583	24.9231	18.9822	24.1094	28.7336	26.9055	22.8665	42.9084	13.6197	32.7707	8.23722	42.4818	11.9713	36.4089	9.39682
YER086W	ILV1	1730	48.3142	27.9273	1008	76.8951	77.413	61.3179	61.4279	68.2423	55.008	73.9399	55.9179	64.6368	50.1865	55.348	58.052	65.0416	62.5164	54.0444	58.7951	59.8831	57.5938	12.5915	55.1256	10.7636	53.0411	59.7221	53.939	51.2763	47.756	40.8454	41.5665	35.5516	34.6155	45.3678	33.3495	38.4234	32.4146	29.5161	28.207	29.0686	10.2801	27.2356	7.0042	32.0232	8.2593	25.6852	6.86601
YMR200W	ROT1	770	21.4942	27.9145	1009	39.2398	43.5314	33.3322	35.5534	34.4392	33.236	35.2331	30.1395	28.503	26.9838	31.374	25.9972	23.4818	25.4048	23.2044	23.5836	28.9036	27.2477	7.31756	26.7275	5.2921	26.8726	26.6528	25.1885	21.0936	15.7269	12.1024	12.5161	11.4459	12.3938	13.0846	14.3963	14.4129	11.5374	8.63107	9.06386	10.1691	1.94568	5.93831	1.18164	10.359	2.01069	7.84929	1.54661
YDR432W	NPL3	1244	34.7206	27.9104	1010	35.0455	58.3278	28.9046	47.2448	31.6223	37.8602	39.6166	48.5526	25.9595	30.4213	26.1145	40.9729	33.5033	38.0673	29.8484	40.3705	36.4888	45.747	14.5692	44.6573	14.6654	50.3421	48.7402	38.5036	29.2395	31.0702	21.9355	16.4026	12.024	12.8779	15.0707	11.9292	15.3364	8.35087	7.88517	8.16124	21.6774	10.3963	16.422	6.49045	24.1045	5.04219	17.32	5.46
YCR035C	RRP43	1184	33.0323	27.8989	1011	46.4167	53.6101	40.7672	42.8366	44.0713	35.7408	54.0903	43.4163	40.4728	31.3952	39.1411	40.1316	50.9918	37.7488	42.4422	38.0776	41.0399	40.1881	7.91087	31.6276	7.17572	41.3063	42.9407	34.1783	33.6126	36.8239	30.3639	25.2297	21.7356	20.8661	20.289	16.6893	16.8205	16.8116	15.131	14.9685	25.0506	6.56303	16.2754	2.70578	22.3614	5.01126	14.7773	2.64798
YMR031C	EIS1	2531	70.6018	27.8948	1012	58.7199	104.325	47.8681	92.4772	64.7893	88.7258	66.2482	86.445	61.8688	72.1287	51.3727	77.4868	67.9891	105.282	61.5809	89.1753	75.293	101.518	26.5673	87.7554	18.5223	87.8933	132.771	125.518	47.332	40.2762	40.6293	16.8637	14.6253	13.2652	14.5644	11.0294	13.7862	13.1306	11.1884	8.61255	25.7947	8.30543	30.3147	7.03845	32.3718	9.77505	28.5965	10.4513
YLR250W	SSP120	704	19.6309	27.8848	1013	24.2336	29.5928	21.5532	23.5745	20.3546	20.4233	29.4436	29.9456	20.199	23.2027	26.1756	23.3891	25.545	28.2718	20.0311	22.1915	23.4742	23.3291	4.74652	27.173	3.67756	26.8726	27.023	24.5948	23.0658	19.275	12.4265	11.1327	8.15085	9.05328	9.89135	10.565	9.43269	10.8781	7.99173	8.53733	10.8139	2.43936	5.865	1.11314	9.96056	1.97976	6.37525	1.26541
YKR035W-A	DID2	614	17.1213	27.8848	1014	25.3521	25.8401	17.1256	20.1246	22.0811	19.1709	38.7895	30.624	24.6877	20.51	20.916	24.9035	30.0646	22.0599	31.1375	22.519	29.3826	28.5235	5.86723	20.6025	4.75392	30.2756	16.7814	20.948	16.6348	12.2746	18.0455	10.474	9.19139	8.23025	7.00962	5.65984	7.09101	7.03231	7.086	5.6038	6.10143	1.39392	3.70228	1.01039	4.98028	1.63949	3.97992	1.19511
YIL027C	EMC5	425	11.8484	27.8786	1015	20.319	19.6213	14.2852	15.2372	14.3572	15.0285	20.594	16.9595	14.4385	11.4581	14.1275	13.5455	16.8008	15.6092	17.2545	12.8563	16.6874	12.3025	5.47169	20.0457	4.57452	21.8266	11.3521	9.41388	12.3475	12.5623	10.3734	8.95886	8.96016	8.85963	4.63414	4.58592	4.0897	10.054	7.56551	5.49097	8.03603	2.78784	3.22575	1.01039	7.37081	2.25816	3.57456	1.07794
YHL040C	ARN1	1883	52.4747	27.8676	1016	11.8372	51.0368	13.9511	80.9775	14.3572	50.7692	82.7068	160.873	48.1035	141.393	67.763	135.707	7.66351	10.8309	6.84232	11.7099	7.66504	11.2089	81.0864	85.9736	61.3973	78.8575	45.6553	32.1429	59.0793	38.2624	39.981	6.19215	7.39936	4.98657	36.6447	24.0906	28.364	7.41689	4.95487	5.22771	20.3381	13.5326	15.1024	6.4562	23.7559	18.1271	22.1107	15.6067
YCR016W	YCR016W	872	24.2809	27.8451	1017	31.1309	32.4877	22.305	27.5036	27.4423	24.1804	45.5715	40.7997	31.0466	19.2496	26.9707	35.1677	34.6823	24.8473	33.8149	23.4198	27.7059	32.4421	5.47169	22.4957	4.35028	35.0869	28.5037	25.9518	26.1526	40.468	30.3639	20.6186	20.0014	17.6224	12.7731	12.7419	12.8298	19.0642	11.0819	12.1102	14.6831	3.74616	8.28431	1.47277	13.9946	3.06244	7.66504	1.00764
YGR271C-A	EFG1	701	19.5178	27.8428	1018	31.5037	25.4112	19.7153	21.6579	26.8062	20.905	38.7068	35.7603	36.059	20.3954	27.9492	30.5404	32.3243	17.1223	33.1208	19.653	23.554	24.6961	5.40576	19.4888	3.76726	27.4593	19.2493	19.6759	18.0067	34.906	23.8805	22.3313	18.0359	17.8161	11.7606	11.8421	12.0052	17.361	9.16385	12.9376	12.1037	3.02016	6.70809	0.89051	10.6578	2.50563	5.96989	0.773305
YDL121C	YDL121C	449	12.5008	27.8414	1019	23.6744	18.978	14.4523	15.908	19.8094	14.3541	26.9624	23.2587	16.6829	12.6612	19.754	18.5093	18.864	15.5296	20.527	15.1492	14.7712	15.492	3.2962	17.0388	2.87029	18.1889	11.1054	9.24426	18.607	15.5351	16.2085	15.678	11.7349	10.3604	7.51587	6.70473	8.14641	12.0868	9.74991	7.48427	4.66288	1.24872	1.72284	0.685008	3.98422	1.11361	2.46903	0.398369
YPR148C	YPR148C	1307	36.3554	27.8159	1020	51.3566	58.7567	40.7672	48.1073	48.2512	44.9891	61.0376	54.3673	42.1187	35.2337	38.713	41.7301	47.9461	46.4294	44.6238	42.6633	47.3476	50.4857	4.81245	41.4277	5.47149	39.7808	84.7709	74.7174	27.0959	26.659	18.2616	22.3313	21.5044	17.2835	32.3221	24.7872	26.9788	15.1634	10.2294	12.5239	12.7485	2.55552	10.7769	1.35289	12.0523	2.07256	8.51261	1.75751
YLR330W	CHS5	2015	55.9726	27.778	1021	82.0215	102.61	66.8315	79.2525	73.7853	72.4449	96.0226	84.8944	71.0705	59.9259	62.1977	68.0638	83.2179	69.5246	71.9931	67.3933	80.6426	73.906	16.6128	64.7029	13.6339	75.2197	85.6346	67.8478	48.7897	43.2489	36.9554	28.0623	25.7243	22.8026	22.314	18.2856	20.6794	20.7124	15.5572	16.8114	23.7113	7.11479	21.2973	4.72655	24.752	6.12487	19.8996	5.90524
YLR222C	UTP13	2453	68.0832	27.7551	1022	104.484	108.4	90.9744	88.8356	90.5051	81.5969	102.308	78.8859	73.3149	56.4311	77.6095	72.4388	78.6984	56.3842	74.7697	68.6216	67.8675	62.6059	12.4596	54.0119	10.2254	65.4799	90.8171	82.7743	89.4335	88.3199	74.8833	57.5739	48.6161	41.9259	46.0688	37.0356	46.0421	39.9963	33.8849	33.4724	63.9906	18.8179	34.3835	7.15833	56.7752	14.0439	33.8293	5.5303
YDR510W	SMT3	305	8.4598	27.7371	1023	8.57497	13.2953	7.51855	7.18735	6.26993	9.34462	11.9098	11.4355	8.15441	8.53628	7.7059	10.096	7.95826	11.2291	7.7348	11.7918	10.4596	12.9404	2.83473	14.3661	2.19757	17.3674	12.7095	10.262	7.63143	8.9183	5.72701	3.22783	3.98872	2.9048	3.73846	2.64126	3.59497	3.13158	1.33196	2.21895	2.03381	1.56816	1.97944	0.548006	3.536	0.83521	2.46903	0.843605
YIL040W	APQ12	416	11.5347	27.7277	1024	11.8372	14.6892	10.8601	12.9372	15.3568	11.5604	20.8421	17.3471	15.7851	13.0622	11.62	14.8075	13.1655	16.0074	14.1805	12.7744	16.2084	13.7605	2.43919	15.7024	1.83878	15.0205	13.6966	9.15945	10.804	11.5075	10.0493	8.366	6.9369	6.48738	6.075	4.12152	3.89181	6.86749	4.42209	5.15249	10.7643	1.65528	6.1949	0.941886	9.11391	2.28909	5.74878	0.585837
YDL002C	NHP10	611	16.9335	27.7144	1025	17.7092	21.7657	16.1231	19.0704	21.2633	17.2442	22.7444	25.0031	16.6081	16.7861	15.2895	20.2761	20.043	24.2898	19.2378	19.9805	19.2424	24.2404	4.81245	22.9411	3.18423	23.4695	23.9382	18.4037	14.4911	19.275	14.2635	12.3843	10.1163	9.10169	7.59375	5.80496	6.33243	8.29593	4.9016	6.43121	10.0202	1.71336	6.67143	1.18164	10.1598	1.88696	6.89116	1.33571
[truncated: 4,133 more rows]
[truncated: 4 more columns]
