# Supplementary material for: Two roles for the yeast transcription coactivator SAGA and a set of genes redundantly regulated by TFIID and SAGA
Source: eLife. 2020 Jan 8;9:e50109. doi: 10.7554/eLife.50109 (PMC6977968; doi:10.7554/eLife.50109)
Supplement: Supplementary file 3. — Rows are sorted by the average expression. [file elife-50109-supp3.xlsx]

## Sheet: Supp File 3
gene_id	gene_name	class	expression	expression_rank	WT	Spt3_7_GC	Spt3_7_YPD	spt3_del	spt7_del	spt20_del	Taf13_GC	Taf1_YPD	Taf7_YPD	Taf13_YPD
YPR036W-A	SPO24	CR	1605.62	1	-0.131205	-0.117938	0.329104	-1.45435	-1.17412	-0.652682	0.200644	0.364835	0.320209	-0.29963
YLR109W	AHP1	CR	732.796	2	-0.190351	-0.374501	-0.529806	-2.44952	-3.68372	-2.99639	-0.653262	-0.287279	-0.218624	-0.953177
YHR179W	OYE2	CR	690.266	3	-0.2665	-0.362166	-0.552765	-1.55072	-1.97753	-1.39798	-0.634455	-0.363773	-0.345184	-0.726756
YGR209C	TRX2	CR	604.756	4	0.168333	-0.825282	-1.06631	-2.22147	-2.1916	-1.83149	0.218668	0.17801	0.335258	-0.332492
YOL151W	GRE2	CR	550.24	5	-0.0664533	-0.893803	-1.17509	-2.31681	-2.97543	-2.7684	-0.343379	-0.227656	-0.141557	-0.638299
YGR192C	TDH3	CR	550.045	6	-0.160005	-0.540739	-0.355305	-2.98626	-2.06767	-1.33837	-0.459031	0.0156529	-0.0241389	-0.423727
YOL109W	ZEO1	CR	542.509	7	-0.171356	-1.50146	-1.19514	-2.91629	-2.36762	-1.67458	-0.470145	-0.0201228	-0.125246	-0.627181
YLR110C	CCW12	CR	436.509	8	-0.279165	-0.442795	-0.568089	-2.46484	-2.46103	-1.61932	-0.589609	-0.224193	-0.0537693	-0.361659
YDL184C	RPL41A	TFIID	422.926	9	-0.264112	0.185331	0.253851	-0.609496	-0.651107	-0.122374	-1.92834	-1.31294	-0.933639	-0.545384
YDL133C-A	RPL41B	TFIID	420.731	10	-0.141772	-0.0103405	0.084615	-0.314736	-0.526176	-0.236497	-1.45186	-1.50929	-1.44732	-0.310353
YDR524C-B	YDR524C-B	CR	409.177	11	-0.405737	-0.410289	-0.699479	-1.37503	-1.42294	-1.15933	-0.611322	-0.27855	0.123791	-0.552678
YGL008C	PMA1	CR	408.467	12	-0.0151357	-0.928085	-1.19758	-2.82962	-2.50996	-1.65816	-1.24371	-0.461034	-0.507676	-0.703904
YPL240C	HSP82	CR	398.202	13	0.212258	-0.534931	-0.584735	-3.54174	-2.93763	-2.47517	-1.61542	-1.65037	-1.97493	-1.81407
YMR186W	HSC82	CR	383.734	14	0.0147709	-0.319269	-0.37347	-2.47579	-1.68127	-1.11699	-1.28557	-1.08879	-1.21372	-1.13209
YBR244W	GPX2	CR	378.81	15	0.310946	-1.16647	-1.58719	-2.7243	-2.75041	-2.32275	-0.647078	-0.451571	0.0729052	-0.860356
YNL134C	YNL134C	CR	370.296	16	-0.0237826	-0.415455	-0.689582	-1.54557	-1.54012	-1.10935	-0.399621	-0.243575	-0.181677	-0.635422
YHR174W	ENO2	CR	357.248	17	-0.14065	-0.559424	-0.850144	-3.26076	-2.92375	-2.39931	-0.778648	-0.0310181	-0.100354	-0.484252
YCR012W	PGK1	CR	346.842	18	-0.101297	-0.862946	-0.981101	-3.36294	-2.89074	-2.32702	-0.320288	0.123465	-0.0204447	-0.49429
YGR142W	BTN2	CR	342.685	19	-0.0158814	-0.160191	0.0707674	-3.48946	-2.99942	-2.70471	-2.16389	-1.89327	-1.97074	-2.35112
YML028W	TSA1	CR	335.079	20	0.14188	-0.373795	-0.864449	-1.97105	-2.23372	-1.72804	-0.458927	-0.099008	-0.193029	-0.525532
YOR298C-A	MBF1	CR	324.496	21	0.114072	-0.314172	-0.360688	-2.45833	-2.36849	-1.99419	-1.21733	-1.28684	-1.15249	-1.36801
YLR075W	RPL10	CR	318.658	22	-0.0410815	0.0876307	-0.103077	-0.649369	-0.923596	-0.632657	-0.873959	-0.670294	-0.398471	-0.642942
YLL024C	SSA2	CR	317.379	23	-0.0268247	-0.664105	-0.800712	-2.85417	-2.62712	-2.13678	-1.30496	-1.00823	-1.29972	-1.12512
YKL152C	GPM1	CR	311.268	24	-0.155999	-0.770614	-0.884079	-2.68525	-2.43085	-1.9892	-0.406849	0.213745	0.126421	-0.34058
YML131W	YML131W	CR	307.081	25	0.13642	-1.00211	-1.18564	-2.40573	-1.91212	-1.66579	-0.304261	-0.24054	-0.109355	-0.537339
YCR024C-A	PMP1	CR	295.357	26	-0.0784809	-0.782378	-0.939748	-2.56171	-3.00825	-2.14794	-1.71084	-0.681005	-0.267994	-1.03638
YOR153W	PDR5	CR	294.463	27	-0.113171	-1.65137	-1.43682	-3.64695	-3.94871	-3.70376	-1.18222	-0.690761	-0.565558	-0.802689
YPL187W	MF(ALPHA)1	CR	288.694	28	-0.240187	-1.02291	-0.925605	-2.64972	-5.08619	-3.96243	-2.54966	-0.445668	-0.483623	-0.803705
YLR460C	YLR460C	CR	286.623	29	-0.247868	-0.980658	-1.20903	-2.42876	-1.97365	-1.66502	-0.700599	-0.387952	-0.254283	-0.857862
YDR353W	TRR1	CR	280.192	30	0.318199	-0.469774	-0.752414	-2.09271	-2.37776	-2.17531	-0.289452	0.08162	0.0589066	-0.484759
YGR055W	MUP1	CR	273.711	31	-0.0168709	-0.765691	-0.379408	-1.4896	-1.30205	-0.904008	0.0838767	-0.388232	-0.131844	-0.78835
YJR104C	SOD1	CR	265.484	32	-0.0758979	-0.905276	-1.37087	-3.35608	-3.13918	-2.30744	-0.362413	-0.139502	0.128115	-0.537874
YDR011W	SNQ2	CR	263.237	33	0.0853237	-1.26514	-1.13022	-3.36166	-3.04405	-2.69138	-0.905264	-0.59682	-0.553193	-0.824506
YNL031C	HHT2	CR	252.641	34	-0.107722	-0.339152	-0.654666	-1.65955	-1.38217	-1.03949	-0.643316	-0.594206	-0.316416	-0.859717
YGR155W	CYS4	CR	252.116	35	-0.0460349	-1.2543	-1.50301	-2.51164	-2.85612	-2.56326	-0.847603	-0.580932	-0.514491	-0.93805
YKL060C	FBA1	CR	251.879	36	-0.215081	-1.09013	-1.29433	-3.22626	-3.3209	-2.74499	-0.382371	0.274553	0.2803	-0.143478
YEL017C-A	PMP2	CR	251.507	37	-0.479418	-0.773911	-1.11808	-2.06433	-2.51626	-1.87106	-1.43559	-1.13778	-0.70882	-0.836064
YAL005C	SSA1	CR	250.882	38	0.0186698	-0.690611	-0.611936	-4.27861	-3.96071	-3.40295	-1.36905	-1.28544	-1.68856	-1.7005
YPL061W	ALD6	CR	249.455	39	-0.15266	-0.662206	-0.534668	-2.25857	-2.9665	-1.97373	-1.02939	-0.138074	-0.31443	-0.672702
YJR045C	SSC1	CR	240.684	40	0.0268983	-0.246038	-0.293678	-2.23698	-1.66095	-1.17621	-1.0319	-1.00284	-1.25873	-1.19796
YAL038W	CDC19	CR	237.015	41	-0.183245	-0.828821	-1.09251	-2.67463	-2.11354	-1.65306	-0.548116	0.0556726	-0.0655077	-0.327116
YLL026W	HSP104	CR	228.336	42	0.14758	-0.754785	-0.768179	-4.34326	-3.29198	-2.78808	-1.83196	-1.42545	-1.80843	-1.87573
YNL030W	HHF2	CR	224.54	43	-0.135425	-0.479658	-0.74216	-1.77555	-1.61686	-0.922143	-0.551182	-0.389979	-0.121987	-0.88405
YBR008C	FLR1	CR	219.549	44	0.288622	-1.22587	-1.59182	-1.79989	-2.25726	-1.85019	0.194081	-0.112472	0.146361	-0.504745
YLR249W	YEF3	CR	217.065	45	-0.0590168	-0.286781	-0.559013	-1.20677	-1.75948	-1.32136	-1.46449	-0.999656	-1.03669	-0.771124
YDR050C	TPI1	CR	209.999	46	-0.224317	-0.873247	-1.09238	-3.04289	-2.62311	-2.22792	-0.396417	0.244119	0.468521	-0.234719
YOR369C	RPS12	TFIID	208.999	47	-0.128294	0.143565	-0.033932	-0.344868	-0.798468	-0.339695	-2.24994	-1.75976	-1.4038	-0.816149
YGR234W	YHB1	CR	208.545	48	-0.202013	-1.42689	-2.08047	-3.47452	-4.2862	-3.54613	-0.280527	-0.0458535	-0.198654	-0.540115
YER091C	MET6	CR	207.503	49	-0.159275	-1.26948	-0.93175	-0.872183	-1.09534	-0.988846	-0.104678	-0.668867	-0.658065	-0.991894
YJL034W	KAR2	CR	197.429	50	-0.0349216	-0.534255	-0.600683	-2.73471	-2.1406	-1.56057	-1.35248	-0.84812	-0.972735	-1.01437
YLR355C	ILV5	CR	192.207	51	-0.183193	-0.274351	-0.734993	-1.35475	-1.24202	-0.959368	-0.666107	-0.337032	-0.335806	-0.780227
YCL026C-A	FRM2	CR	185.836	52	0.4919	-1.08593	-1.31395	-1.18119	-1.57515	-1.58454	-0.89866	-0.599733	-0.162712	-1.06708
YIL053W	GPP1	CR	185.484	53	-0.263348	-1.31166	-1.34579	-1.56192	-2.22169	-2.07589	-0.815931	-0.12735	0.00284379	-1.0994
YDR224C	HTB1	CR	184.403	54	-0.175241	-0.446571	-0.6549	-2.06444	-1.87073	-1.11448	-1.24551	-0.873392	-0.846178	-1.1335
YDR225W	HTA1	CR	182.733	55	-0.244482	-0.469977	-0.889646	-1.99755	-1.95919	-1.40195	-1.09786	-0.971588	-0.596061	-0.969868
YLR044C	PDC1	CR	181.864	56	-0.10573	-0.773388	-1.23084	-2.33005	-1.93852	-1.54905	-0.455741	0.378919	0.252402	-0.108181
YLR325C	RPL38	TFIID	180.674	57	-0.177712	0.0382266	-0.157959	-0.97313	-1.4768	-0.785565	-2.58764	-1.72634	-1.76867	-1.38385
YLR108C	YLR108C	CR	180.476	58	-0.068477	-0.442662	-0.204484	-2.53189	-2.21443	-2.02993	-0.330002	-0.309498	-0.320428	-0.75838
YJR123W	RPS5	TFIID	180.228	59	-0.0989724	-0.0648617	-0.264147	-1.14901	-1.4071	-0.985638	-2.37708	-1.61673	-1.829	-1.01514
YNL178W	RPS3	TFIID	180.052	60	-0.157984	0.0906211	-0.14035	-0.790407	-1.20543	-0.612017	-2.7123	-1.93524	-1.73403	-1.32537
YLR167W	RPS31	TFIID	179.196	61	-0.253731	0.100617	-0.189407	-0.522775	-0.825905	-0.234276	-2.48053	-1.6586	-1.36697	-0.923042
YNL007C	SIS1	CR	177.849	62	-0.00309975	-0.19703	-0.211756	-2.51114	-1.80231	-1.37339	-1.4906	-1.35302	-1.37442	-1.60003
YBR009C	HHF1	CR	176.935	63	-0.117594	-0.719247	-0.921907	-2.29016	-3.15109	-2.10529	-0.960473	-0.580783	-0.346419	-0.886917
YHL015W	RPS20	TFIID	175.724	64	-0.046873	-0.123066	-0.186586	-1.35964	-1.96256	-1.20145	-2.58611	-1.86369	-1.76483	-1.31639
YBR101C	FES1	TFIID	172.692	65	-0.030902	0.145893	0.177009	-2.10982	-1.52803	-1.25477	-1.69923	-1.69182	-1.58202	-1.70666
YNL064C	YDJ1	TFIID	172.267	66	0.0288009	0.0333981	-0.182192	-1.6827	-1.5602	-1.12215	-1.62686	-1.49953	-1.63419	-1.55461
YOR020C	HSP10	TFIID	165.373	67	-0.0829057	0.258	0.14266	-1.36756	-1.32638	-0.975586	-2.32279	-1.99208	-1.73776	-1.94143
YDL081C	RPP1A	TFIID	165.057	68	-0.185816	0.0228181	-0.131387	-1.00107	-1.45825	-0.798202	-2.35563	-1.5841	-1.60481	-0.926068
YBL002W	HTB2	CR	162.427	69	-0.17921	-0.635005	-0.670771	-1.90328	-2.23301	-1.2262	-0.485065	-0.207407	-0.273401	-0.465988
YEL009C	GCN4	CR	157.785	70	0.0802878	-0.0324076	-0.1576	-0.859405	-0.705727	-0.28886	-0.780671	-0.612324	-0.55411	-0.719416
YOR027W	STI1	CR	157.598	71	-0.00168126	-0.424392	-0.656051	-3.15612	-2.97381	-2.5486	-2.01716	-1.84109	-2.1527	-2.15302
YHR055C	CUP1-2	CR	157.103	72	-0.00360224	-0.0381187	-0.0952931	-1.64145	-0.479964	-0.657084	-0.0311196	-0.695069	-0.28823	-1.15348
YDL124W	YDL124W	CR	156.423	73	0.109274	-2.20084	-2.27996	-3.58347	-3.62848	-3.34018	-0.657102	-0.218762	-0.245635	-0.772614
YDL055C	PSA1	CR	153.993	74	-0.128647	-0.965394	-1.15944	-2.18951	-2.66068	-2.21345	-0.689088	-0.0789593	0.0108072	-0.365227
YEL034W	HYP2	CR	153.263	75	-0.295375	-0.561541	-0.91133	-2.07503	-2.48655	-1.96887	-0.931911	-0.610595	-0.45288	-0.853138
YBR010W	HHT1	CR	153.228	76	-0.197496	-0.36909	-0.74086	-1.78847	-1.44726	-1.20506	-0.920461	-0.713416	-0.46793	-0.900709
YPL106C	SSE1	TFIID	152.571	77	-0.0306983	0.145214	0.144039	-1.40219	-1.55402	-1.10229	-2.20136	-2.03541	-2.06915	-1.69883
YEL071W	DLD3	CR	151.867	78	-0.127243	-1.1258	-1.01306	-2.1635	-2.76014	-2.28664	-0.442261	-0.10426	0.00841145	-0.453886
YAL003W	EFB1	CR	150.864	79	-0.170956	-0.162158	-0.138462	-1.5805	-2.52752	-2.19622	-1.88683	-1.30221	-1.44229	-1.11429
YMR058W	FET3	CR	150.834	80	-0.714086	-0.811915	-0.743612	-2.15224	-2.28752	-1.85391	-0.526031	-0.320575	-0.448661	-0.785812
YDR382W	RPP2B	TFIID	150.718	81	-0.331846	-0.0247859	-0.196345	-1.1155	-1.40298	-0.842735	-2.27078	-1.83906	-1.90378	-1.15498
YCR005C	CIT2	CR	150.337	82	-0.152433	-0.734907	-0.793889	-1.38413	-1.18264	-0.850706	0.00466641	0.551949	0.756817	-5.78e-05
YEL046C	GLY1	CR	150.286	83	0.0611342	-0.589313	-0.791771	-2.35089	-2.26774	-1.84997	-0.743392	-0.294258	-0.277635	-0.756081
YLR441C	RPS1A	TFIID	149.781	84	0.0385575	-0.0862712	-0.296003	-1.0337	-1.54861	-1.14537	-2.30226	-1.81578	-1.73675	-1.35461
YOL086C	ADH1	CR	149.345	85	-0.306628	-1.27239	-1.77267	-3.17203	-4.86613	-4.15962	-0.597681	0.259307	0.249074	-0.356792
YMR318C	ADH6	CR	146.363	86	0.0341331	-0.737823	-0.813339	-0.965654	-1.69897	-1.51061	-1.2735	-0.786525	-0.502348	-1.08755
YPR149W	NCE102	CR	146.055	87	-0.102438	-0.941867	-1.2501	-4.55961	-4.34637	-3.76773	-0.871651	-0.2938	-0.230493	-0.946061
YKL096W-A	CWP2	CR	145.242	88	-0.181599	-1.11437	-1.53494	-3.55036	-4.95951	-3.81551	-1.1228	-0.339473	-0.273678	-0.655081
YKL056C	TMA19	CR	142.595	89	-0.18625	-0.480498	-0.809151	-1.14193	-2.29759	-1.82911	-1.5235	-1.06656	-0.610193	-0.674636
YCR024C-B	YCR024C-B	CR	139.909	90	-0.0388943	-0.621608	-0.798537	-2.507	-2.65932	-1.85959	-1.73901	-0.627355	-0.155709	-0.853194
YGL253W	HXK2	CR	136.334	91	-0.255851	-0.50292	-0.6117	-1.43631	-1.5396	-0.919296	-1.0187	-0.278348	-0.284932	-0.609673
YLR259C	HSP60	TFIID	136.203	92	0.0601126	-0.0414992	-0.252582	-1.89188	-1.51276	-1.13173	-1.82383	-1.546	-1.60542	-1.62493
YPL131W	RPL5	TFIID	132.503	93	-0.24577	-0.0692841	-0.273159	-0.964509	-1.58328	-1.06495	-2.55373	-1.69307	-1.61516	-1.33152
YBL003C	HTA2	CR	130.675	94	-0.226523	-0.76053	-0.96677	-2.07379	-2.41618	-1.52637	-0.596777	-0.45632	-0.0509451	-0.660023
YOR063W	RPL3	CR	130.16	95	-0.0799352	-0.148956	-0.434174	-0.885646	-1.50435	-1.17665	-1.48086	-0.992402	-0.992477	-0.978999
YDL020C	RPN4	CR	125.6	96	0.161284	0.332209	0.617828	-0.779371	-0.560802	-0.491774	0.347336	-0.0947919	-0.240885	-0.50487
YNL231C	PDR16	CR	123.717	97	-0.0805239	-1.15579	-1.11745	-2.59228	-2.78143	-2.47249	-0.187607	-0.0261961	0.0243156	-0.453795
YHR162W	MPC2	CR	122.019	98	-0.339367	-0.655795	-0.532154	-2.06359	-1.66312	-1.58156	-0.878903	-0.589458	-0.599325	-0.995584
YCL026C-B	HBN1	CR	121.064	99	0.352766	-0.810593	-1.2206	-0.812568	-1.4571	-1.13413	0.00585849	-0.210587	-0.151679	-0.707016
YOL039W	RPP2A	TFIID	120.244	100	-0.0851017	-0.096151	-0.346415	-1.35553	-1.58196	-1.40194	-2.85412	-1.90095	-1.93783	-1.35566
YKL081W	TEF4	CR	118.852	101	-0.188496	0.087771	-0.101141	-1.13912	-1.28228	-0.860423	-1.73475	-0.751617	-0.655607	-0.93902
YDL061C	RPS29B	TFIID	118.42	102	-0.0358423	-0.272666	-0.444845	-1.14051	-1.59516	-1.0933	-2.2331	-1.72487	-1.5911	-1.48331
YJL101C	GSH1	CR	117.679	103	0.0120756	-0.647929	-0.715146	-1.8252	-2.16902	-1.96505	-0.58204	-0.516047	-0.423454	-0.836593
YJL190C	RPS22A	TFIID	117.11	104	-0.203494	-0.152958	-0.271962	-1.22998	-1.66484	-1.19494	-2.48791	-1.87579	-1.67307	-1.19036
YLR216C	CPR6	TFIID	116.195	105	-0.00898626	-0.126757	-0.388932	-2.53614	-2.05596	-1.6309	-2.03503	-1.81634	-1.90187	-2.08782
YLR029C	RPL15A	TFIID	115.988	106	-0.196736	0.0183811	-0.2879	-0.473018	-1.22764	-0.891561	-2.9027	-2.14674	-1.61239	-1.58468
YKR071C	DRE2	CR	115.818	107	-0.0299293	-0.00555427	-0.0505526	-0.914953	-1.28713	-1.09998	-0.782425	-0.786155	-0.599735	-0.964908
YOR302W	YOR302W	CR	115.526	108	-0.197939	-1.15985	-0.116584	-1.7834	-1.5963	-1.16763	-0.240983	0.058513	0.231293	-0.758981
YDR502C	SAM2	CR	114.83	109	-0.229362	-1.1782	-1.09686	-3.47858	-2.81841	-2.53157	-0.886919	-0.722385	-0.622338	-1.19971
YDR033W	MRH1	CR	114.772	110	0.0689948	-1.97867	-2.36857	-4.79835	-5.43438	-4.82979	-0.781057	-0.2774	-0.221614	-0.712308
YPR065W	ROX1	CR	113.602	111	-0.282941	-0.520366	-0.046879	-1.73935	-1.5075	-1.19087	-0.199226	-0.0942162	-0.154501	-0.660962
YLR340W	RPP0	TFIID	113.421	112	-0.150683	-0.0102011	-0.289356	-1.03405	-1.2031	-0.809072	-2.28194	-1.54608	-1.44476	-1.32774
YLR264W	RPS28B	TFIID	111.939	113	0.118441	-0.118165	-0.376452	-1.17027	-1.28273	-0.978752	-2.38597	-2.40704	-1.96114	-1.59936
YER131W	RPS26B	TFIID	111.735	114	-0.239298	-0.141217	-0.318769	-0.994326	-1.66002	-1.20123	-2.76439	-2.00288	-1.89652	-1.48594
YBL092W	RPL32	TFIID	111.405	115	-0.226621	0.0403437	-0.344941	-1.25189	-1.69084	-1.35685	-2.52869	-1.72072	-1.65185	-1.28384
YJR009C	TDH2	CR	110.337	116	-0.279266	-1.46242	-1.53738	-3.67217	-2.85988	-2.27613	0.301118	0.861113	0.995569	-0.148998
YDR135C	YCF1	CR	108.314	117	0.0154868	-0.451515	-0.564236	-1.34457	-1.18879	-0.868558	-0.281456	-0.338238	-0.212406	-0.382445
YPL250C	ICY2	CR	106.919	118	-0.152604	-0.296734	0.201625	-0.625508	-0.365164	-0.337325	-0.323886	-0.0486475	-0.0240553	-0.47863
YML063W	RPS1B	TFIID	106.714	119	-0.252712	-0.133987	-0.272055	-1.37611	-1.83813	-1.18883	-2.54922	-1.8095	-1.64714	-1.18786
YCR102C	YCR102C	CR	106.068	120	-0.073654	-1.42554	-1.54203	-2.89563	-2.84702	-2.49428	-0.776427	-0.594642	-0.404171	-1.06163
YGL255W	ZRT1	CR	105.848	121	-0.349817	-1.35578	-0.0620604	-3.31367	-2.36245	-1.61996	-0.911255	-1.96756	-1.55876	-1.75715
YAL012W	CYS3	CR	105.723	122	-0.0654148	-0.691426	-0.713383	-1.1957	-1.94293	-1.70758	-0.659823	-0.523505	-0.620853	-1.17134
YBR196C	PGI1	CR	105.328	123	-0.223675	-0.269135	-0.540774	-1.97158	-1.28585	-0.729548	-0.844086	-0.247112	-0.173587	-0.56717
YGR027C	RPS25A	TFIID	105.297	124	-0.179077	0.0222814	-0.216864	-0.89133	-1.32473	-0.930046	-2.38471	-1.6099	-1.41298	-0.967543
YER043C	SAH1	CR	105.153	125	-0.245891	-0.351485	-0.476414	-2.48752	-2.21363	-1.86566	-2.10715	-1.76908	-1.70959	-1.57847
YMR251W-A	HOR7	CR	104.822	126	0.195458	-0.675693	-1.24653	-2.53611	-2.46207	-2.52893	-0.481433	-0.0424758	0.250293	-0.95716
YML116W	ATR1	CR	104.576	127	0.195329	-0.526156	-0.926632	-0.710386	-1.16279	-0.986971	-0.546457	-0.717549	-0.404681	-0.877944
YJL159W	HSP150	CR	104.183	128	-0.0956419	-0.328919	-0.482986	-2.01278	-2.35325	-1.79154	-0.526097	-0.323026	-0.361438	-0.710723
YGL123W	RPS2	TFIID	103.652	129	-0.10499	-0.018302	-0.165659	-0.998667	-1.4466	-0.937667	-2.43082	-1.65056	-1.75523	-1.21481
YBR078W	ECM33	CR	103.292	130	-0.125293	-0.753059	-0.95084	-2.16302	-2.33126	-1.60615	-1.00125	-0.526232	-0.444375	-0.864573
YEL054C	RPL12A	TFIID	102.41	131	-0.0862817	-0.0445484	-0.359716	-1.0939	-1.47862	-1.06681	-3.0894	-2.10041	-2.01726	-1.46612
YGL189C	RPS26A	TFIID	101.88	132	-0.202403	-0.141722	-0.216551	-1.13768	-1.56696	-1.22217	-2.27726	-1.46998	-1.52336	-0.909699
YER177W	BMH1	CR	101.302	133	-0.0338716	-0.586666	-0.673709	-2.94273	-2.82379	-2.19965	-1.09471	-0.833177	-0.605861	-1.16003
YBR068C	BAP2	CR	100.821	134	0.131664	-0.34812	-0.525208	-1.36931	-1.17875	-1.21753	-0.0734036	-0.0466515	0.222836	-0.33684
YHR143W	DSE2	CR	100.425	135	-0.0644457	-0.691539	-1.00476	-2.64056	-3.48807	-2.79849	-0.366149	0.0524178	0.0384295	-0.369403
YHR071W	PCL5	CR	100.389	136	-0.236472	-1.33423	-0.839716	-1.79368	-2.45426	-2.30111	-0.516625	0.215477	0.183848	-0.313605
YHR018C	ARG4	CR	100.098	137	-0.0274116	0.0652473	-0.0407394	-0.749065	-1.03469	-0.98884	-0.948671	-0.259892	-0.00535398	-0.478245
YOR052C	TMC1	CR	100.054	138	0.187279	-0.544825	-0.859559	-1.22361	-1.28535	-1.06259	-0.207955	-0.631615	-0.877399	-1.24722
YGR157W	CHO2	CR	100.015	139	-0.0506651	0.0402532	-0.0762816	-2.45352	-1.83323	-1.39328	-0.96278	-0.352314	-0.0983495	-0.492139
YGR148C	RPL24B	TFIID	99.8962	140	-0.170155	-0.173342	-0.219428	-1.32228	-1.69105	-1.38532	-2.84434	-1.70649	-1.79634	-1.34649
YOR167C	RPS28A	TFIID	97.8907	141	-0.263712	0.219805	-0.175054	-1.11042	-1.3686	-0.932698	-2.44119	-1.81754	-1.4935	-1.03214
YML130C	ERO1	CR	97.6653	142	0.0985138	-0.333837	-0.487936	-1.80648	-1.8603	-1.82103	-1.58369	-1.58706	-1.43461	-1.58003
YDR258C	HSP78	TFIID	97.0459	143	-0.00206803	-0.666813	-0.724105	-2.90389	-1.63856	-1.35566	-1.94198	-1.44187	-1.74222	-1.81656
YMR307W	GAS1	CR	96.3658	144	-0.0575254	-0.763688	-1.14396	-2.64635	-2.65735	-1.93959	-1.33763	-0.509986	-0.515859	-0.748614
YLR286C	CTS1	CR	96.2365	145	-0.014095	-1.52235	-1.53815	-3.16821	-5.00193	-4.40599	-0.514751	0.170708	-0.0273306	-0.158107
YHL033C	RPL8A	TFIID	96.1265	146	-0.172863	0.0263032	-0.103252	-0.980541	-1.21905	-0.724967	-1.73821	-1.64961	-1.61605	-1.41439
YHR072W-A	NOP10	TFIID	95.6929	147	-0.183022	0.0822771	0.142467	-0.930744	-1.47176	-0.740205	-2.56972	-2.09416	-1.93591	-1.95636
YDR418W	RPL12B	TFIID	95.091	148	-0.182975	-0.196316	-0.254532	-1.18034	-1.42655	-0.932434	-2.85134	-2.01468	-1.61369	-1.48602
YHR005C-A	TIM10	TFIID	93.1628	149	-0.0997688	-0.0308843	-0.311221	-1.42452	-1.47037	-1.08715	-3.17483	-2.86297	-2.34	-2.34204
YFL039C	ACT1	TFIID	92.5367	150	-0.142416	-0.070516	-0.267746	-1.85214	-1.2997	-0.716398	-1.97644	-1.5712	-1.52674	-1.07374
YDR513W	GRX2	CR	91.7493	151	0.27545	-0.262213	-0.661706	-1.63712	-1.37707	-1.15015	-0.879528	-0.378834	-0.0772865	-1.16451
YDL192W	ARF1	TFIID	91.176	152	-0.130448	-0.290795	-0.164932	-1.41939	-1.53902	-1.11416	-2.42944	-1.82677	-1.61019	-1.44185
YER145C	FTR1	CR	90.9382	153	-0.734566	-0.96878	-0.928667	-2.58743	-2.59412	-2.31023	-0.819502	-0.580546	-0.377172	-1.13764
YGL089C	MF(ALPHA)2	CR	89.3796	154	-0.0762596	-1.58327	-0.90291	-1.28229	-6.80159	-6.43594	-3.38773	-0.238717	-0.325856	-0.329271
YDR037W	KRS1	CR	88.9398	155	-0.0535526	-0.326027	-0.478589	-0.970847	-1.99818	-1.66069	-1.82057	-1.13987	-1.01478	-1.16831
YDR132C	YDR132C	CR	88.8416	156	0.236685	-0.262494	-0.173272	-1.76036	-2.05965	-1.88722	-0.6888	-0.777674	-0.543297	-0.948882
YDL147W	RPN5	TFIID	88.2198	157	-0.033484	-0.168897	-0.214491	-1.59908	-1.45641	-0.921183	-1.94146	-1.57247	-1.67171	-1.79245
YLR333C	RPS25B	TFIID	87.8905	158	-0.186211	-0.211486	-0.203609	-1.54824	-1.73388	-1.2323	-2.93606	-2.35127	-2.16087	-1.55092
YOR198C	BFR1	TFIID	87.4763	159	-0.0827416	-0.121507	0.00836012	-1.49702	-1.01238	-0.604642	-1.99274	-1.51367	-1.52795	-1.51664
YPR145W	ASN1	CR	87.3877	160	0.0447331	-0.250784	-0.613563	-2.151	-1.60222	-1.32024	-1.06844	-0.124321	-0.0736969	-0.530172
YGR211W	ZPR1	TFIID	87.2756	161	0.0502033	0.00210044	-0.0877306	-1.82415	-2.05029	-1.6659	-1.83531	-1.65511	-1.75909	-1.72819
YER052C	HOM3	CR	87.1422	162	-0.0143398	0.0704796	-0.198728	-0.527948	-1.33151	-1.20085	-1.12423	-0.790048	-0.634419	-1.17457
YLR197W	NOP56	TFIID	86.9907	163	-0.245146	0.00211632	-0.0510192	-1.23176	-1.54363	-1.01652	-2.87443	-2.03498	-2.00558	-1.70755
YPR080W	TEF1	CR	86.2436	164	-0.237671	0.0418426	-0.333728	-0.702875	-1.0994	-0.818781	-1.33336	-0.772196	-0.641364	-0.469944
YKR042W	UTH1	CR	85.532	165	-0.0507867	-0.94986	-1.29071	-2.50001	-1.86032	-1.43238	-0.890577	-0.399558	-0.258629	-0.882077
YML123C	PHO84	CR	85.3764	166	-0.301637	-0.979018	-0.890488	-6.39603	-11.3907	-7.73791	-1.10233	-0.878329	-0.728045	-1.1209
YER124C	DSE1	CR	85.2327	167	-0.028183	-0.481571	-0.227534	-2.15799	-2.79791	-2.17895	-0.493458	0.0829337	-0.152337	-0.170651
YBR118W	TEF2	CR	84.8821	168	-0.170624	0.124395	0.00296621	-1.2844	-1.26444	-0.805756	-1.17936	-0.860598	-0.849416	-0.464111
YOL040C	RPS15	TFIID	84.7745	169	-0.158622	-0.0131982	-0.279144	-1.23233	-1.47503	-0.8555	-2.57882	-1.68039	-1.80446	-1.20908
YLR293C	GSP1	TFIID	84.5577	170	-0.16545	-0.167867	-0.265987	-1.06511	-1.92416	-1.4782	-2.51047	-1.92048	-1.78461	-1.55917
YEL027W	VMA3	TFIID	84.2145	171	-0.0807285	-0.197672	-0.485437	-1.27073	-1.5744	-1.07223	-2.60314	-2.12987	-1.63701	-1.35398
YLR304C	ACO1	CR	84.0657	172	-0.126014	-1.17128	-1.95136	-3.15374	-4.1667	-3.69341	0.434588	0.382735	0.263441	-0.147106
YGR282C	BGL2	TFIID	83.6392	173	-0.0427897	-0.473923	-0.603895	-1.72613	-2.12281	-1.76559	-1.81624	-2.0853	-1.83351	-1.61856
YDL229W	SSB1	TFIID	83.1201	174	-0.167921	-0.0742086	-0.406141	-1.18788	-1.50368	-1.14495	-2.15302	-1.60289	-1.796	-1.12178
YKL216W	URA1	CR	83.0541	175	-0.206797	-0.0431319	0.0438981	-2.0062	-2.15438	-1.79948	-1.14813	-1.24113	-1.30939	-1.10593
YDR099W	BMH2	TFIID	83.0249	176	-0.111665	-0.05653	-0.13635	-1.6046	-1.09354	-0.672323	-2.04205	-1.68672	-1.75579	-1.43809
YBR025C	OLA1	TFIID	82.7597	177	-0.0699658	0.132584	0.0578087	-1.35311	-1.76675	-1.35583	-2.75287	-2.09856	-1.9041	-1.74493
YGR169C-A	LSO2	TFIID	82.754	178	-0.0853492	0.0147254	0.223145	-1.79305	-1.53597	-0.550874	-2.21844	-2.08599	-2.3742	-2.16459
YKL068W-A	YKL068W-A	CR	82.4073	179	-0.0199319	-1.03634	-0.871082	-0.607246	-1.41952	-1.42833	-0.310666	-0.733227	-0.278549	-1.05248
YPL237W	SUI3	TFIID	82.2523	180	-0.12518	-0.0988407	-0.120527	-1.41496	-1.49198	-0.96408	-2.58424	-1.9261	-1.91774	-2.05225
YDR002W	YRB1	TFIID	82.0467	181	-0.163166	-0.270875	-0.323082	-1.07127	-1.66695	-1.36737	-2.31397	-1.76774	-1.76454	-1.48543
YDL182W	LYS20	CR	81.7164	182	0.284092	-0.838142	-1.19963	-1.06468	-1.64543	-1.65505	-0.189987	0.0725785	0.148349	-0.494663
YGL031C	RPL24A	TFIID	80.7393	183	-0.201406	-0.139183	-0.178169	-1.23369	-1.81196	-1.29695	-2.93984	-1.76907	-1.6517	-1.35182
YMR309C	NIP1	TFIID	80.4077	184	-0.000231583	-0.0307455	-0.0294345	-1.44685	-1.57083	-1.01465	-2.23687	-2.01677	-2.16292	-1.88009
YLL060C	GTT2	CR	80.0647	185	0.249628	-1.32562	-1.44925	-2.13824	-1.58213	-1.64467	-0.471478	-0.463432	-0.504775	-0.758835
YDR086C	SSS1	TFIID	79.5043	186	-0.245118	0.0415297	0.055676	-1.34892	-1.30432	-0.695212	-2.62504	-2.02078	-1.75128	-1.74188
YDR276C	PMP3	CR	79.2983	187	-0.0790748	-1.0814	-1.21051	-2.64002	-2.85543	-2.4779	-1.0294	-0.92656	-0.200649	-0.92181
YDR533C	HSP31	CR	79.0106	188	-0.0604659	-1.43324	-1.86756	-4.23431	-3.7199	-3.64585	-0.495815	-0.289314	2.92e-06	-0.599513
YDR497C	ITR1	CR	78.9268	189	-0.210964	-0.817407	-0.289785	-3.85272	-2.09091	-1.60018	-1.50446	-0.945618	-1.03231	-1.22632
YLL045C	RPL8B	TFIID	78.9013	190	-0.215888	0.0547562	-0.311217	-1.04815	-1.55615	-1.10946	-2.61259	-1.71691	-1.69782	-1.31556
YLR214W	FRE1	CR	78.544	191	-0.328623	-0.737031	-0.969346	-1.17331	-2.51921	-2.562	-1.15566	-0.910031	-0.473999	-1.0519
YDR155C	CPR1	CR	77.458	192	-0.107027	-0.348814	-0.341341	-2.11918	-2.6201	-2.12662	-1.26892	-0.671709	-0.63126	-0.720796
YDR171W	HSP42	CR	76.6874	193	0.0270778	-0.234542	-0.267153	-4.67759	-2.98514	-2.89912	-1.55545	-1.27625	-1.48279	-2.02738
YLR150W	STM1	TFIID	76.5848	194	-0.27008	0.035445	-0.173198	-1.43478	-1.4892	-1.08699	-2.57487	-1.63092	-1.77584	-1.30679
YOR007C	SGT2	TFIID	76.436	195	-0.0381528	0.105562	-0.277781	-1.51941	-1.45719	-0.994722	-2.15065	-2.01259	-1.8876	-1.75865
YDR363W-A	SEM1	TFIID	75.5557	196	-0.133903	-0.091446	-0.0603756	-1.53939	-1.43042	-0.479075	-2.53926	-2.37072	-2.27047	-1.97297
YDL232W	OST4	TFIID	75.2511	197	-0.290956	0.0368204	-0.154302	-1.54437	-0.951123	-0.542631	-2.08777	-2.09362	-2.03239	-2.05428
YGL054C	ERV14	TFIID	75.0648	198	-0.26644	-0.032266	-0.165602	-1.44297	-1.58524	-0.991028	-2.64832	-2.29157	-2.10282	-1.94122
YNL209W	SSB2	TFIID	74.5681	199	-0.144475	0.0225333	-0.24101	-1.04599	-1.49209	-1.13527	-2.61486	-1.79479	-1.97724	-1.44157
YNL067W	RPL9B	TFIID	74.5338	200	-0.259506	-0.0149368	-0.0265489	-0.958825	-0.902266	-0.463086	-1.64482	-1.2061	-1.10553	-1.08122
YOR136W	IDH2	CR	74.4276	201	-0.0386978	-1.00683	-1.15033	-2.58142	-3.79494	-3.20067	0.270581	0.209071	0.333532	-0.167238
YNL036W	NCE103	CR	74.3026	202	-0.285152	-1.3222	-0.793518	-1.08259	-1.6343	-1.54106	-0.199069	-0.374022	-0.240322	-1.41623
YJR007W	SUI2	TFIID	74.2161	203	-0.122366	-0.0279907	-0.0939435	-0.955974	-1.30536	-0.875902	-2.19744	-2.06389	-1.85327	-2.03061
YPL037C	EGD1	TFIID	73.9562	204	-0.0823371	0.0464852	-0.227569	-1.50601	-1.38906	-1.14594	-2.67862	-1.70649	-1.64159	-1.59635
YIL138C	TPM2	TFIID	73.7118	205	-0.1681	0.340165	0.197494	-1.11821	-0.417781	0.304866	-2.44629	-1.5934	-1.89966	-1.95748
YOL139C	CDC33	TFIID	73.6055	206	-0.207168	0.0102956	-0.16551	-1.18768	-1.35219	-0.933033	-2.3389	-1.81017	-1.89674	-1.63328
YPR165W	RHO1	TFIID	73.1174	207	-0.0600158	-0.149765	-0.310829	-1.91827	-1.47482	-1.17689	-2.25911	-1.74076	-1.78708	-1.78565
YBR143C	SUP45	TFIID	73.0813	208	-0.0754285	0.0703219	-0.116913	-1.39687	-1.29363	-0.843101	-2.53847	-2.04324	-1.99885	-1.88804
YDR345C	HXT3	CR	72.5823	209	0.115204	-1.35311	-1.49212	-2.13921	-3.05662	-2.63617	-1.00918	0.107909	0.395524	-0.195921
YPR035W	GLN1	CR	72.367	210	-0.0753929	-0.0260272	-1.07224	-1.81473	-1.17718	-0.919504	-1.32018	0.110538	0.0993503	-0.300902
YNL281W	HCH1	TFIID	72.2492	211	-0.132246	0.2633	0.24032	-1.61741	-1.71643	-1.41654	-1.68478	-1.86765	-1.61759	-1.36972
YER165W	PAB1	TFIID	72.1428	212	-0.0208878	-0.0430789	-0.158935	-1.21742	-1.54343	-1.09025	-2.72171	-1.79083	-1.96832	-1.65987
YNL244C	SUI1	TFIID	71.4351	213	-0.0860657	0.167225	-0.0529926	-0.63184	-0.967479	-0.675304	-2.39821	-2.18142	-1.83667	-1.75977
YDL084W	SUB2	TFIID	70.7871	214	-0.144495	0.0740245	-0.0605601	-1.90778	-1.37219	-0.981911	-2.12923	-1.4977	-1.59136	-1.48148
YMR038C	CCS1	CR	70.6318	215	-0.227474	-0.835946	-0.886731	-2.30132	-3.06004	-2.60571	-1.23972	-0.643669	-0.566447	-1.12076
YNL069C	RPL16B	TFIID	70.3635	216	-0.0985698	-0.0166582	-0.273594	-1.21868	-1.60793	-1.25528	-2.60132	-1.62727	-1.65261	-1.39492
YBR082C	UBC4	TFIID	70.1835	217	-0.141665	0.0164362	-0.0722535	-1.87054	-1.65623	-1.32366	-2.10094	-2.03016	-1.70655	-1.73046
YBR079C	RPG1	TFIID	70.1096	218	-0.0582049	0.00694591	-0.0643241	-1.51099	-1.32935	-0.93618	-2.17216	-1.9129	-2.23026	-1.73155
YOR226C	ISU2	CR	70.0025	219	-0.166902	-0.725763	-0.999214	-1.71605	-1.54987	-1.57116	-0.649037	-0.513865	-0.103772	-0.99464
YLR043C	TRX1	TFIID	69.9705	220	-0.145925	-0.166425	-0.111497	-1.73725	-1.69918	-1.0456	-2.79054	-1.74457	-1.88647	-1.33471
YPL091W	GLR1	CR	69.9552	221	0	-0.566215	-0.673532	-1.94776	-1.92108	-1.41874	-1.16889	-0.687591	-0.587503	-0.900964
YOR383C	FIT3	CR	69.9197	222	-0.657288	-0.46993	-0.00465295	-1.25633	-2.73557	-2.76298	-1.12672	-0.965951	-1.25334	-1.13896
YMR260C	TIF11	TFIID	69.8208	223	-0.145979	-0.00567806	0.102085	-1.39637	-1.41152	-1.11148	-2.74626	-1.71872	-1.63265	-1.69272
YGL135W	RPL1B	TFIID	69.6447	224	-0.122629	-0.144941	-0.459111	-1.04588	-1.5533	-1.09659	-2.95344	-1.98131	-1.94205	-1.37256
YOR344C	TYE7	CR	69.5083	225	-0.208824	-0.646948	-0.00315344	-3.4025	-2.47891	-1.97931	-0.504116	-0.20647	-0.554097	-0.849765
YJR109C	CPA2	CR	69.4964	226	0.0450035	0.128517	0.0786799	-0.40202	-0.831291	-0.724478	-0.679894	-0.472958	-0.230416	-0.720807
YKL172W	EBP2	TFIID	69.2911	227	-0.227141	0.141923	0.324562	-1.26566	-1.36898	-0.680505	-2.78174	-2.01439	-2.29759	-2.18198
YGR240C	PFK1	CR	69.1595	228	-0.0198715	-0.625182	-0.903884	-1.96515	-1.74558	-1.47816	-1.4593	-0.80077	-0.77655	-0.946481
YNL255C	GIS2	TFIID	69.1051	229	-0.0905745	0.0743579	-0.110942	-0.728187	-1.46549	-1.16326	-2.32267	-2.13525	-1.98994	-1.90286
YPR158W	CUR1	TFIID	69.0953	230	-0.0584345	0.15702	0.267649	-2.62962	-2.7371	-2.16384	-1.96786	-2.11558	-2.0476	-2.26064
YBR189W	RPS9B	TFIID	69.0109	231	-0.0828055	-0.167109	-0.11756	-1.34524	-1.4575	-0.993166	-2.23081	-1.63901	-1.70796	-1.24955
YPL225W	YPL225W	TFIID	68.9535	232	-0.093803	0.0669283	0.166309	-1.48669	-0.643268	-0.0818402	-2.24002	-1.75651	-1.5339	-1.52977
YNL327W	EGT2	CR	68.8723	233	-0.0117544	-0.540072	-0.62617	-2.83446	-2.91518	-2.17869	-0.331408	-0.00127729	-0.211237	-0.327471
YGR085C	RPL11B	TFIID	68.1945	234	-0.201242	-0.0483828	-0.119028	-1.04411	-1.5215	-1.01777	-2.45577	-2.05301	-1.94486	-1.45102
YKL182W	FAS1	CR	67.5725	235	-0.0733674	-0.781747	-0.541094	-3.51399	-2.82524	-2.225	-1.29797	-0.484408	-0.446702	-0.580487
YAL035W	FUN12	TFIID	67.2435	236	-0.0421013	0.137877	0.129047	-1.57938	-1.37993	-0.657745	-2.15466	-1.71334	-1.8828	-1.5502
YHR008C	SOD2	CR	67.0117	237	0.3291	-0.788236	-1.33887	-2.36883	-2.74544	-2.47634	-0.658286	0.0664437	-0.203733	-0.814287
YER036C	ARB1	TFIID	66.684	238	-0.130794	-0.181484	-0.398255	-1.34954	-1.78698	-1.4968	-3.12045	-2.54391	-2.47858	-2.0201
YLR346C	YLR346C	CR	66.4489	239	0.0601749	-1.76251	-1.68661	-2.75037	-2.80622	-3.39641	-0.542515	-0.597587	0.0792973	-0.572425
YBR085C-A	YBR085C-A	CR	66.4336	240	-0.00221187	-1.45296	-1.24317	-2.67136	-2.31352	-2.0582	-1.76343	-1.03182	-0.815135	-1.83031
YLR300W	EXG1	CR	65.9487	241	-0.218594	-2.03283	-2.24432	-3.11995	-4.06967	-3.64068	-0.945928	-0.388925	-0.0910202	-0.613647
YER048W-A	ISD11	TFIID	65.8733	242	-0.16057	-0.0445411	0.150993	-0.617802	-0.96421	-0.557932	-1.95029	-1.7993	-1.93144	-1.99654
YOR096W	RPS7A	TFIID	65.8363	243	0.00973359	-0.0520218	-0.287756	-1.25722	-1.46853	-1.27529	-2.27493	-1.66003	-1.50747	-1.24647
YMR116C	ASC1	TFIID	65.5432	244	-0.0497565	-0.123674	-0.532776	-1.31146	-1.87964	-1.45852	-3.08062	-1.89978	-1.62486	-1.22879
YOR210W	RPB10	TFIID	65.2448	245	-0.189027	-0.048213	0.223612	-1.47116	-1.44058	-1.04188	-2.44212	-2.04522	-2.10984	-1.96331
YPL231W	FAS2	CR	65.0179	246	-0.159268	-0.677107	-0.657144	-2.89724	-2.12974	-1.60971	-1.70215	-0.646276	-0.655639	-0.782935
YDR194C	MSS116	TFIID	64.6723	247	-0.00100897	0.118108	0.0180528	-1.20449	-0.884596	-0.353679	-1.42179	-1.43996	-1.57964	-1.34273
YKL043W	PHD1	CR	64.631	248	-0.461075	-0.891811	-0.495087	-3.19371	-3.32197	-2.49963	-0.21804	0.35076	0.028145	-0.331063
YDL168W	SFA1	CR	64.3543	249	0.0709288	-0.770999	-0.833054	-1.79081	-2.26579	-2.04227	-1.09334	-0.939133	-0.582683	-1.06902
YML091C	RPM2	CR	64.2737	250	0.386212	-0.514771	-0.549697	-1.51685	-1.4904	-1.38287	0.171129	0.246489	0.203718	-0.295335
YER021W	RPN3	TFIID	64.0937	251	0.0101606	-0.252018	-0.397512	-1.74558	-1.53946	-1.17624	-2.16341	-1.87927	-1.88769	-1.92288
YNL079C	TPM1	TFIID	63.8203	252	-0.149336	0.0270964	0.109037	-1.61212	-1.48772	-0.664967	-2.5703	-1.36898	-1.5135	-1.15985
YGL028C	SCW11	CR	63.7065	253	0.059356	-0.339738	-0.349306	-1.76663	-2.87074	-2.06745	-0.436401	0.00995411	-0.192476	-0.312892
YCL050C	APA1	TFIID	63.3754	254	-0.2438	0.0705294	0.308916	-1.8753	-1.3983	-0.989127	-2.95525	-2.20372	-2.14049	-2.01312
YOR204W	DED1	CR	63.3389	255	0.0869186	-0.277793	-0.574951	-1.73488	-2.77922	-2.33916	-1.45991	-1.07697	-1.14774	-1.09912
YPL135W	ISU1	CR	62.7801	256	-0.0401448	-0.567693	-0.743817	-0.762429	-2.47149	-2.40346	-0.125424	-0.346491	-0.0200437	-0.88193
YNL131W	TOM22	TFIID	62.3151	257	-0.181388	0.0611479	0.0181191	-1.47035	-1.12111	-0.491668	-2.15575	-1.6549	-1.75028	-1.67046
YML106W	URA5	TFIID	62.2444	258	-0.182084	0.0716562	-0.174541	-1.39793	-1.36624	-0.730038	-2.29129	-1.85457	-1.81315	-1.63416
YHR193C	EGD2	TFIID	62.0771	259	-0.149594	-0.0196569	-0.126789	-1.53223	-1.89508	-1.36458	-2.85922	-1.64234	-1.80437	-1.40285
YOL127W	RPL25	TFIID	62.0679	260	-0.121601	-0.120558	-0.316433	-1.07655	-1.66129	-1.19603	-2.51021	-2.03218	-1.70116	-1.16345
YLR372W	ELO3	TFIID	61.6883	261	-0.0736249	-0.237827	-0.3909	-1.38552	-1.97191	-1.49841	-2.67996	-2.05722	-2.04796	-1.78522
YOR382W	FIT2	CR	61.6694	262	-1.36154	-1.13544	-1.25224	-2.50812	-2.33005	-2.59374	-1.53656	-0.498792	-0.566143	-0.284816
YGR118W	RPS23A	TFIID	61.578	263	0.0232904	-0.175966	-0.390278	-1.2358	-1.74297	-1.22599	-3.41151	-2.2924	-1.79051	-1.65474
YKL164C	PIR1	CR	61.5158	264	-0.140255	-0.289548	-0.255651	-2.28659	-2.78982	-1.85856	-0.472416	-0.211302	-0.408037	-0.598491
YLR048W	RPS0B	TFIID	61.4893	265	-0.116593	-0.0685273	-0.257376	-1.3159	-1.71721	-1.11048	-2.68809	-1.85385	-1.90766	-1.54671
YHR082C	KSP1	TFIID	61.3711	266	-0.013441	0.0247146	-0.00468569	-2.35138	-1.36424	-0.90293	-2.29923	-2.37825	-2.46031	-2.18973
YLR175W	CBF5	TFIID	61.3347	267	-0.0993397	0.0566611	-0.0892114	-1.2309	-1.75503	-1.1733	-2.96358	-2.25205	-2.42388	-2.03199
YGR254W	ENO1	CR	61.2951	268	-0.178912	-1.63357	-2.09107	-4.33787	-3.24543	-2.90286	0.354149	1.0603	1.08887	0.0217349
YGR159C	NSR1	TFIID	61.2732	269	-0.10579	-0.144216	-0.368824	-0.275011	-1.93406	-1.6532	-2.06466	-1.44463	-1.43825	-1.50105
YCR021C	HSP30	CR	61.1662	270	0.489152	-1.13498	-1.58423	-4.98252	-3.47799	-3.21313	-0.750599	-0.537259	-0.117111	-1.21981
YEL040W	UTR2	CR	60.9792	271	-0.300649	-0.77862	-0.950877	-3.23894	-2.76365	-2.00424	-1.15634	-0.325395	-0.294004	-0.691224
YKL082C	RRP14	TFIID	60.9624	272	-0.155572	0.139434	0.397342	-1.08332	-1.35455	-0.677122	-2.39362	-2.06823	-2.22394	-2.01129
YBR109C	CMD1	TFIID	60.9085	273	-0.106551	-0.10749	-0.0593658	-1.60072	-1.20422	-0.710571	-2.05792	-2.03264	-2.19253	-1.60404
YNL287W	SEC21	TFIID	60.8467	274	-0.0448942	-0.0965837	-0.117873	-2.14184	-1.19116	-0.671763	-2.0753	-1.83749	-1.87254	-1.64544
YML058W	SML1	CR	60.8035	275	-0.0386404	-0.543724	-0.9782	-1.88348	-1.67533	-1.37006	-1.17356	-0.761104	-0.10649	-1.03715
YDR071C	PAA1	TFIID	60.7172	276	-0.118596	0.0180851	-0.169785	-1.51816	-1.41949	-0.900077	-2.58587	-2.42518	-2.0503	-2.14023
YER025W	GCD11	TFIID	60.6661	277	-0.0243021	0.149251	0.0593403	-1.42264	-1.3573	-0.862983	-2.2832	-2.03338	-2.01166	-1.74064
YDL243C	AAD4	CR	60.5882	278	0.401955	-1.12498	-1.82185	-0.911811	-0.844358	-0.568835	-0.820813	-0.67726	-0.436091	-1.00685
YLR136C	TIS11	CR	60.2221	279	-1.46778	-1.10012	-0.443093	-1.66677	-3.4	-3.57871	-0.475125	-0.871225	-0.520392	-0.880857
YBR011C	IPP1	TFIID	60.0466	280	-0.173457	0.0492429	-0.0991307	-0.533204	-0.700641	-0.337652	-2.21122	-1.64827	-1.68119	-1.43996
YEL026W	SNU13	TFIID	59.5419	281	-0.25031	0.168699	0.00986617	-0.685312	-1.27662	-1.12326	-2.85898	-2.1079	-1.88689	-1.8137
YNL121C	TOM70	TFIID	59.5032	282	-0.153734	0.0288156	-0.00392768	-1.79287	-1.24505	-0.599517	-2.0252	-1.70561	-1.83686	-1.5925
YDL126C	CDC48	TFIID	59.2287	283	0.0279215	-0.153607	-0.471303	-1.63882	-1.33907	-0.757723	-1.37412	-1.43888	-1.43293	-1.41767
YPR132W	RPS23B	TFIID	58.766	284	-0.217028	-0.178273	-0.261477	-1.15132	-1.74763	-1.16114	-2.77409	-1.7323	-1.433	-1.11959
YBR162C	TOS1	CR	58.7369	285	-0.0567179	-0.334983	-0.378797	-1.5906	-2.10319	-1.47129	-1.27813	-1.0174	-0.766805	-0.934687
YLR180W	SAM1	CR	58.6798	286	-0.164949	-1.10448	-1.25841	-2.1814	-2.85604	-2.58812	-0.805259	-0.806778	-0.738162	-1.31591
YPR133W-A	TOM5	TFIID	58.5921	287	-0.0804647	0.0525114	-0.0774217	-1.39584	-1.32666	-0.905289	-2.10065	-2.02025	-2.161	-1.95044
YJL148W	RPA34	TFIID	58.5756	288	-0.25515	-0.00555232	0.210644	-0.770005	-1.335	-0.993396	-2.49241	-2.36083	-2.07788	-2.32292
YGR264C	MES1	TFIID	58.3123	289	-0.118325	-0.0884693	-0.138651	-1.29512	-1.35901	-1.05105	-2.4129	-1.97981	-1.9306	-1.73226
YJL124C	LSM1	TFIID	58.308	290	-0.116361	-0.0826195	-0.0128216	-1.73417	-1.28003	-0.963542	-1.80155	-1.83828	-1.80551	-1.73653
YBL076C	ILS1	TFIID	58.282	291	-0.0790222	-0.0429827	-0.217794	-1.2203	-1.65014	-1.17795	-2.47723	-1.97533	-1.9014	-1.64517
YLL028W	TPO1	CR	58.1623	292	-0.134901	-2.02095	-1.27291	-4.615	-4.52176	-4.3882	-0.916852	-0.541247	-0.413571	-0.998589
YER148W	SPT15	TFIID	57.9149	293	-0.0535083	-0.183438	-0.279928	-0.973799	-1.37534	-1.15533	-1.58776	-1.77057	-1.43558	-1.39561
YHR143W-A	RPC10	TFIID	57.7147	294	-0.143652	0.180032	0.0220475	-0.747475	-1.1017	-0.904978	-2.42873	-2.21449	-1.69951	-2.18611
YIL078W	THS1	TFIID	57.6492	295	-0.0783617	0.0758615	-0.0424624	-1.25612	-1.54851	-1.06994	-2.3758	-1.78107	-1.83727	-1.49514
YKL040C	NFU1	CR	57.5807	296	-0.0257278	-0.177815	-0.227566	-1.14009	-1.29469	-0.986287	-1.41368	-1.32179	-1.11775	-1.41987
YKL180W	RPL17A	TFIID	57.4705	297	-0.0915879	-0.0956527	-0.321757	-1.43805	-1.51937	-1.12294	-2.82397	-1.80101	-1.81353	-1.51797
YGL058W	RAD6	TFIID	57.4176	298	-0.245735	-0.104896	0.00409353	-1.59077	-1.31092	-0.88852	-2.19552	-2.05468	-1.76988	-1.91754
YJL111W	CCT7	TFIID	57.2322	299	-0.0036516	-0.0217908	-0.0804092	-1.56083	-1.36036	-0.837212	-2.04192	-1.7941	-1.70239	-1.83116
YGR086C	PIL1	CR	57.2141	300	-0.0877472	-0.728915	-0.849042	-3.29839	-2.69051	-2.26567	-0.825635	-0.274604	-0.520499	-0.712006
YMR108W	ILV2	TFIID	57.1736	301	0.0162113	0.0756727	-0.171519	-0.226856	-0.907934	-0.807528	-2.02163	-1.40306	-1.46111	-1.62269
YPR102C	RPL11A	TFIID	56.9375	302	-0.322538	-0.126991	-0.173493	-1.24775	-1.58146	-1.22448	-2.44896	-1.76854	-1.62898	-1.15883
YDL014W	NOP1	TFIID	56.828	303	-0.16438	0.00469173	0.00449595	-0.899725	-1.50602	-1.13467	-3.18874	-2.1913	-2.13488	-2.29899
YHR027C	RPN1	TFIID	56.8239	304	0.00277141	-0.120687	-0.254298	-1.64834	-1.32792	-0.693859	-1.8514	-1.70743	-1.86242	-1.57287
YOR312C	RPL20B	TFIID	56.4728	305	-0.224979	-0.119182	-0.269337	-1.34577	-1.69916	-1.19934	-2.6298	-1.74557	-1.72149	-1.40585
YOR261C	RPN8	TFIID	56.4508	306	-0.0425742	-0.0733226	-0.101296	-1.47901	-1.52448	-1.00159	-1.84709	-1.60104	-1.69082	-1.90871
YIL075C	RPN2	TFIID	56.4332	307	-0.0355435	-0.198557	-0.388293	-1.71523	-1.50266	-0.912924	-1.74403	-1.81845	-1.78158	-1.59373
YLR388W	RPS29A	TFIID	56.4191	308	-0.0436158	-0.320171	-0.100449	-1.15254	-1.7534	-1.0457	-2.54827	-1.65529	-1.63704	-1.45873
YLR342W	FKS1	CR	56.4039	309	-0.0352614	-0.199583	-0.481904	-1.53151	-1.58159	-1.11128	-1.31583	-1.0532	-0.950263	-1.01124
YPL145C	KES1	TFIID	56.3053	310	0.0285061	-0.072977	-0.275319	-1.7231	-1.26365	-0.892272	-2.36339	-2.05171	-2.15271	-1.85025
YGL147C	RPL9A	TFIID	56.2091	311	-0.189771	0.0322073	-0.0384962	-1.15034	-1.49114	-1.21024	-2.81598	-1.84026	-1.83073	-1.28179
YDR427W	RPN9	TFIID	56.1571	312	0.0480355	-0.171164	-0.187639	-1.50945	-1.19042	-0.786096	-1.60434	-1.58308	-1.6903	-1.56181
YCL031C	RRP7	TFIID	56.065	313	0.00268951	0.110383	0.167231	-1.25211	-1.14769	-0.723089	-1.93657	-1.73402	-1.77065	-2.09668
YMR205C	PFK2	CR	56.0156	314	-0.124685	-0.357002	-0.471274	-1.96493	-1.62958	-1.12182	-1.02688	-0.438249	-0.444985	-0.85888
YOR276W	CAF20	TFIID	55.7595	315	-0.137589	-0.120255	-0.0270546	-1.59262	-1.54037	-1.18831	-2.50555	-1.73273	-1.66685	-1.75804
YNR051C	BRE5	TFIID	55.5833	316	-0.00712049	0.0174947	-0.07003	-1.78024	-1.41231	-0.867254	-2.45785	-2.06398	-2.16969	-1.95517
YDL185W	VMA1	TFIID	55.5795	317	-0.0222594	-0.117284	-0.181179	-1.74419	-1.43466	-0.878835	-2.1031	-1.47455	-1.54191	-1.30907
YIL142W	CCT2	TFIID	55.4375	318	0.0353145	-0.076853	-0.101879	-1.33933	-1.55214	-0.994034	-2.00393	-1.93398	-1.95079	-1.92251
YFR033C	QCR6	CR	55.253	319	-0.0547192	0.0336805	-0.353615	-1.65596	-2.01691	-1.17939	-1.23897	-0.576398	-0.765354	-1.14743
YGL030W	RPL30	TFIID	55.2262	320	0.053579	-0.0179731	-0.258057	-0.678636	-1.21951	-1.23266	-2.4734	-1.86764	-1.69009	-1.40559
YMR012W	CLU1	TFIID	55.0931	321	0.0598239	-0.0121847	-0.253043	-1.86874	-1.61811	-1.0662	-2.56003	-2.23864	-2.48443	-1.73641
YPR108W	RPN7	TFIID	55.0842	322	0.00596866	-0.0646611	-0.175044	-1.64371	-1.27586	-0.720339	-2.04711	-1.70069	-1.88468	-1.82542
YBR067C	TIP1	TFIID	54.9583	323	-0.180487	0.199667	0.229888	-1.51637	-0.787256	0.0228127	-2.37831	-0.67079	-0.806614	-1.13088
YBR158W	AMN1	CR	54.9425	324	-0.0162743	-0.752401	-0.80641	-2.89867	-3.32905	-2.87337	-0.463367	0.0578264	-0.0380169	-0.265592
YBL028C	YBL028C	TFIID	54.8692	325	-0.368412	-0.175202	0.0625023	-1.02241	-2.09264	-1.29296	-1.98767	-2.06902	-2.25131	-2.02261
YDL208W	NHP2	TFIID	54.817	326	-0.338139	0.0248545	-0.135741	-1.32738	-1.49143	-1.0693	-2.6414	-2.18444	-2.15214	-2.02998
YER102W	RPS8B	TFIID	54.7497	327	-0.255806	-0.119519	-0.235732	-1.18688	-1.48501	-0.902382	-2.86671	-1.86238	-1.68624	-1.42202
YKL156W	RPS27A	TFIID	54.6348	328	-0.060597	-0.0600213	-0.204111	-0.854982	-1.54017	-0.965554	-2.41464	-2.08436	-1.76328	-1.83569
YPL274W	SAM3	CR	54.3645	329	-0.182098	-0.802379	-0.74483	-1.68832	-1.9077	-1.65258	-0.600285	-0.626819	-0.128254	-1.05381
YNL180C	RHO5	CR	54.242	330	-0.0799423	-0.540321	-0.432661	-2.93655	-3.03096	-2.62899	-0.225917	0.0764031	0.0144438	-0.640906
YOR122C	PFY1	TFIID	54.162	331	-0.163212	0.0963106	-0.0820127	-1.10209	-0.7782	-0.400364	-2.30252	-1.73154	-1.40814	-1.61005
YPL004C	LSP1	CR	54.0507	332	-0.0750223	-0.900196	-1.21873	-3.59216	-2.09376	-1.57984	-0.873041	-0.245505	-0.410909	-0.859842
YOR310C	NOP58	TFIID	54.0108	333	-0.0671317	0.089622	-0.134777	-1.00832	-1.62039	-1.15367	-2.68271	-2.2435	-2.15113	-1.81072
YDL130W	RPP1B	TFIID	53.9348	334	-0.258259	-0.150442	-0.243546	-1.40864	-1.45531	-1.03548	-2.49194	-1.62269	-1.39876	-0.800355
YMR122W-A	YMR122W-A	CR	53.7857	335	-0.202449	-1.87105	-1.92724	-2.93406	-3.64033	-3.29746	-0.887671	-0.372714	-0.186496	-0.927199
YOR303W	CPA1	CR	53.727	336	-0.0448354	-0.749271	-0.642838	-0.94293	-1.45066	-1.36515	-0.348109	-0.157239	0.000522867	-0.707229
YOR270C	VPH1	TFIID	53.7125	337	-0.0751015	-0.034665	-0.188513	-1.69824	-1.59795	-1.03974	-2.39927	-2.11967	-2.11706	-1.92965
YGL215W	CLG1	TFIID	53.5786	338	0.00837788	0.000983912	0.0320126	-1.10055	-1.08422	-0.733367	-1.88772	-1.78371	-1.88873	-1.78695
YGL105W	ARC1	TFIID	53.5772	339	-0.0985129	0.0766339	-0.0751943	-1.67629	-1.56341	-1.05232	-2.04728	-1.59974	-1.76886	-1.58837
YLR421C	RPN13	TFIID	53.5569	340	-0.0682477	0.0401898	0.072647	-1.4659	-1.02582	-0.594606	-2.22269	-1.6	-1.41654	-1.80651
YDR233C	RTN1	TFIID	53.2548	341	-0.0906256	0.0219484	-0.280987	-1.26609	-1.23633	-0.727732	-2.93517	-1.74245	-1.72651	-1.68146
YDR054C	CDC34	TFIID	53.2159	342	-0.0103322	-0.302214	-0.149633	-1.51688	-1.45925	-1.11183	-2.37436	-2.23558	-1.97959	-2.27602
YPR074C	TKL1	TFIID	52.9412	343	-0.079987	-0.0884491	-0.50085	-0.87225	-1.10834	-0.721568	-1.74422	-1.22513	-1.22596	-1.24142
YKL071W	YKL071W	CR	52.8432	344	0.122436	-1.15959	-1.4509	-2.59984	-2.75084	-2.22462	-0.874739	-0.754494	-0.616518	-1.15985
YDR023W	SES1	TFIID	52.8357	345	-0.168785	0.0399608	-0.0341737	-1.44469	-1.47555	-0.984114	-2.49897	-1.75602	-1.81288	-1.62324
YER064C	VHR2	CR	52.7558	346	0.0375683	-0.733505	-0.609484	-2.02673	-1.49616	-0.809392	-0.644383	-0.0710237	-0.350417	-0.729741
YKR076W	ECM4	CR	52.6774	347	0.00978249	-0.640983	-0.759942	-2.52451	-1.74421	-1.6567	-0.633362	-0.203546	-0.142327	-0.850766
YML026C	RPS18B	TFIID	52.5782	348	-0.240311	-0.119207	-0.235204	-0.960097	-1.58279	-1.16874	-2.76081	-2.00442	-1.65599	-1.35361
YCR093W	CDC39	TFIID	52.3866	349	0.0127379	-0.0127127	-0.18423	-1.90108	-1.54352	-0.975894	-2.28286	-2.14509	-2.19816	-1.99864
YHR007C	ERG11	CR	52.3493	350	-0.303372	-0.778714	-0.632695	-1.93443	-1.81932	-1.33278	-2.0089	-1.47056	-1.40011	-1.47364
YLR390W-A	CCW14	CR	52.3341	351	-0.145716	-0.201448	-0.381698	-1.42064	-1.41165	-1.00525	-1.41007	-1.36506	-1.30325	-1.22696
YPL226W	NEW1	TFIID	52.1199	352	-0.0763771	-0.0827538	-0.148721	-1.29545	-1.91785	-1.33225	-2.19142	-2.01197	-2.15018	-1.67176
YJR094W-A	RPL43B	TFIID	51.9995	353	-0.0724324	0.0436897	-0.239871	-0.650372	-1.32164	-0.788239	-2.69117	-2.21448	-1.91046	-1.37532
YDL074C	BRE1	TFIID	51.9165	354	-0.106164	0.081461	0.121904	-1.7218	-1.22707	-0.707254	-1.79654	-1.50049	-1.73034	-1.72095
YER026C	CHO1	CR	51.8778	355	-0.321284	-0.619093	-0.284891	-3.46482	-2.08598	-1.33014	-2.00704	-1.84912	-1.19724	-1.95763
YPL239W	YAR1	TFIID	51.8506	356	-0.036829	0.0863349	0.12153	-1.3414	-1.7928	-1.3874	-2.83112	-2.46447	-2.30786	-2.35369
YLR354C	TAL1	CR	51.8074	357	-0.213093	-0.451562	-0.619323	-1.41481	-1.41618	-0.998289	-1.84007	-1.28819	-1.2226	-1.2011
YDL137W	ARF2	TFIID	51.756	358	-0.262231	-0.408265	-0.249728	-1.79899	-1.25825	-0.886496	-2.37501	-1.63277	-1.55282	-1.75806
YJR121W	ATP2	CR	51.7113	359	-0.102049	-0.00788478	-0.405287	-1.35728	-0.592048	-0.2749	-1.88336	-0.73436	-0.802287	-1.00348
YDR487C	RIB3	CR	51.6461	360	-0.167271	-0.773898	-0.391476	-1.92666	-2.25489	-1.67687	-0.847227	-0.952753	-0.681007	-1.22696
YDL082W	RPL13A	TFIID	51.5432	361	-0.222374	-0.0576958	-0.206019	-1.2323	-1.58729	-1.32344	-2.68625	-1.72334	-1.6703	-1.58655
YML126C	ERG13	TFIID	51.5379	362	-0.242501	-0.271363	-0.0307097	-1.13443	-0.636424	-0.101589	-2.29542	-1.46046	-1.62564	-1.40554
YDR046C	BAP3	CR	51.5192	363	0.125439	-0.714795	-0.593967	-2.18606	-2.56618	-2.33488	-0.392485	-0.321587	-0.142094	-0.786214
YPL154C	PEP4	CR	51.51	364	-0.195648	-0.472571	-0.573414	-2.38821	-1.04594	-0.749335	-0.87323	-0.717933	-0.750869	-0.830527
YPR041W	TIF5	TFIID	51.4611	365	0.0132319	-0.0554143	-0.236578	-1.20434	-1.64224	-1.29088	-2.31426	-2.04835	-1.98633	-1.90542
YOR293W	RPS10A	TFIID	51.1902	366	-0.230232	-0.162495	-0.180418	-1.13375	-1.65722	-1.35386	-2.69513	-1.90764	-1.42511	-1.2559
YDR060W	MAK21	TFIID	51.1829	367	-0.048939	0.157835	0.204468	-1.12273	-1.47734	-0.980519	-2.39888	-2.02991	-2.15631	-1.83376
YGR162W	TIF4631	TFIID	50.8784	368	-0.123648	-0.0791497	-0.257333	-1.24078	-1.88237	-1.39336	-2.75233	-2.11536	-2.50534	-1.97524
YPL160W	CDC60	TFIID	50.8539	369	-0.064996	0.0894759	-0.0584071	-0.946868	-1.20552	-0.846713	-2.14479	-1.63941	-1.76924	-1.53591
YDR003W-A	YDR003W-A	TFIID	50.8418	370	-0.0297693	-0.476412	-0.281453	-2.01616	-1.61641	-1.15079	-1.7484	-2.19848	-1.73274	-1.83627
YMR142C	RPL13B	TFIID	50.814	371	-0.18868	-0.0442292	-0.287581	-1.34781	-1.5848	-1.27639	-2.67085	-1.52222	-1.5337	-1.08068
YDR064W	RPS13	TFIID	50.4553	372	0.0636383	-0.0127786	-0.300712	-0.338112	-0.874148	-0.578776	-2.41442	-2.18241	-1.85969	-1.58376
YOR151C	RPB2	TFIID	50.3984	373	-0.0587607	-0.00369048	-0.161645	-1.58486	-1.3785	-0.875679	-1.9492	-1.64052	-1.65962	-1.60866
YPL093W	NOG1	TFIID	50.3614	374	-0.0827217	0.151137	-0.00880932	-0.849778	-1.71547	-1.33445	-2.58865	-2.25693	-2.39816	-1.95972
YKL009W	MRT4	TFIID	50.1499	375	-0.173862	0.16402	0.017817	-0.528296	-1.34554	-1.1839	-2.93292	-2.34452	-2.0037	-2.08422
YMR177W	MMT1	CR	49.8272	376	-0.0320753	-0.648082	-0.288192	-1.39045	-1.52877	-1.34965	-1.0778	-1.4803	-1.27035	-1.59164
YGR037C	ACB1	TFIID	49.8241	377	-0.0730927	-0.2583	-0.238579	-0.73332	-0.789241	-0.0600415	-2.15489	-1.18408	-1.10431	-1.15237
YCL037C	SRO9	TFIID	49.7954	378	-0.153845	0.218737	0.143673	-1.07789	-1.56873	-0.899781	-2.08116	-1.92003	-2.32146	-1.86693
YLR009W	RLP24	TFIID	49.7326	379	-0.148043	0.148361	0.224877	-0.791822	-1.60644	-1.09062	-2.42908	-2.21902	-2.45004	-1.90475
YGR285C	ZUO1	TFIID	49.7292	380	-0.237481	0.142898	0.0203526	-1.40644	-1.41602	-0.906299	-2.36115	-1.74096	-1.94041	-1.67704
YKL122C	SRP21	TFIID	49.7176	381	-0.154917	0.17552	0.280181	-1.41535	-0.960019	-0.335646	-2.68843	-2.17068	-2.20705	-2.07994
YOR341W	RPA190	TFIID	49.5907	382	-0.0179975	0.0850781	0.000506252	-1.01505	-1.68503	-1.19917	-2.87802	-1.94651	-1.97707	-1.85332
YOL058W	ARG1	CR	49.5449	383	-0.114496	0.137321	0.332765	-0.745372	0.0300332	0.132161	-0.429705	0.294914	0.354116	-0.364488
YFR032C-A	RPL29	TFIID	49.5169	384	-0.00948258	-0.0390732	-0.606979	-0.85025	-1.17332	-0.66047	-2.62613	-1.9284	-1.50823	-0.853464
YCR031C	RPS14A	TFIID	49.3953	385	-0.180265	0.0283583	-0.171251	-1.27992	-1.51235	-0.816923	-2.33534	-1.50445	-1.51413	-0.973249
YIL069C	RPS24B	TFIID	49.3906	386	-0.0681471	-0.125026	-0.256829	-1.12573	-1.75223	-1.28298	-2.81892	-2.06738	-2.14093	-1.86786
YNL016W	PUB1	TFIID	49.3466	387	-0.103125	-0.0975447	-0.173022	-1.62637	-1.52004	-1.0652	-2.5829	-1.84954	-2.16832	-1.6488
YDR172W	SUP35	TFIID	49.2531	388	-0.133236	0.156297	-0.0272855	-1.35247	-1.65767	-1.07566	-2.24139	-1.85417	-2.16825	-1.93195
YKL196C	YKT6	TFIID	48.968	389	-0.0325528	-0.01486	-0.0746316	-1.31448	-1.05533	-0.575558	-2.40269	-1.88814	-1.98118	-1.95296
YNL154C	YCK2	TFIID	48.9328	390	-0.00857764	-0.111763	-0.231375	-1.81291	-1.44905	-1.01083	-2.12638	-1.98986	-1.99757	-1.9227
YMR242C	RPL20A	TFIID	48.857	391	-0.326858	-0.184729	-0.262263	-1.35499	-1.54096	-1.11033	-2.36735	-1.60885	-1.58656	-1.44486
YJR088C	EMC2	TFIID	48.796	392	-0.0448715	-0.00769007	0.127478	-1.67953	-1.07854	-0.495488	-2.03817	-2.04382	-2.1085	-1.77385
YKL001C	MET14	TFIID	48.724	393	-0.269107	-0.257139	-0.728732	1.52079	-1.02583	-1.08211	-0.148341	-1.4735	-0.943358	-1.76805
YGR253C	PUP2	TFIID	48.7196	394	0.00564497	-0.117277	-0.206164	-1.49636	-1.5839	-1.08087	-2.27256	-1.92488	-1.73129	-2.07293
YOR254C	SEC63	TFIID	48.7118	395	-0.0217734	0.100334	0.0469364	-1.6621	-1.2171	-0.757998	-2.54016	-2.03356	-2.12883	-1.81487
YBR106W	PHO88	TFIID	48.5617	396	-0.149962	-0.151625	-0.391163	-0.655089	-1.23969	-0.78154	-1.86032	-1.61993	-1.46279	-1.51865
YDL097C	RPN6	TFIID	48.5028	397	-0.120212	-0.186226	-0.285926	-1.92582	-1.6149	-1.04433	-2.11191	-1.77929	-1.79342	-1.94167
YLR040C	AFB1	CR	48.4895	398	-0.178889	-0.312629	-0.524979	-1.51625	-4.13479	-3.25878	-3.96788	-1.26413	-1.19652	-1.58447
YBR283C	SSH1	TFIID	48.4147	399	-0.0118824	0.0335094	-0.229702	-1.7151	-1.49106	-1.00278	-2.28667	-2.02371	-1.89381	-1.86327
YGR218W	CRM1	TFIID	48.1868	400	0.0165006	0.0279513	-0.0309167	-1.73391	-1.0484	-0.555281	-1.79357	-1.9004	-1.93744	-1.45241
YNL260C	LTO1	CR	48.1825	401	-0.0347786	-0.518899	-0.240898	-1.30034	-1.71676	-1.58497	-1.58243	-1.2283	-0.889983	-1.67099
YMR072W	ABF2	TFIID	48.029	402	-0.135028	-0.17329	-0.239516	-1.58916	-1.41311	-0.929895	-2.59907	-2.11625	-2.04054	-1.93119
YKL013C	ARC19	TFIID	47.9349	403	-0.13778	0.0454828	-0.0847044	-1.84424	-1.32691	-0.744131	-2.00621	-1.88469	-1.59684	-1.93499
YGL206C	CHC1	TFIID	47.8777	404	0.00979889	-0.0482705	-0.279714	-2.25332	-1.28708	-0.649206	-1.79994	-1.5598	-1.58032	-1.40796
YOR232W	MGE1	TFIID	47.8666	405	-0.145172	0.13726	0.0240467	-1.40453	-1.32481	-0.78161	-1.9604	-1.60946	-1.55235	-1.67423
YBL027W	RPL19B	TFIID	47.8081	406	-0.232056	-0.0593056	-0.223282	-1.09746	-1.65527	-1.12568	-2.69538	-1.76	-1.58614	-1.27041
YPL243W	SRP68	TFIID	47.7409	407	-0.00529908	0.148918	0.08849	-1.36096	-1.14665	-0.654633	-2.10738	-1.7936	-1.89837	-1.76913
YER055C	HIS1	CR	47.7344	408	0.00627894	0.353059	0.0797847	-0.793187	-1.04157	-0.915929	-1.66153	-0.915496	-0.903719	-1.35062
YKR094C	RPL40B	TFIID	47.6851	409	-0.155809	-0.159701	-0.0984168	-1.21894	-1.51768	-1.03903	-2.36313	-1.87797	-1.84399	-1.3311
YER072W	VTC1	CR	47.5336	410	-0.42804	-0.10067	-0.27446	-2.33604	-2.67569	-2.26448	-1.7316	-1.7235	-1.22145	-1.1904
YMR039C	SUB1	TFIID	47.5081	411	-0.083384	-0.13343	-0.165553	-1.19599	-0.975361	-0.545104	-3.58794	-3.23547	-3.32602	-3.3083
YNR016C	ACC1	CR	47.3576	412	-0.0884615	-0.366864	-0.517338	-2.91014	-2.15858	-1.49457	-1.65991	-0.753972	-0.686078	-0.839631
YDL070W	BDF2	CR	47.1426	413	-0.0658474	-1.0271	-1.11039	-3.17064	-2.40609	-1.74021	0.447007	0.509399	0.16342	0.0801944
YOR206W	NOC2	TFIID	46.9829	414	-0.210025	0.109612	0.175437	-1.17908	-1.57671	-0.936984	-2.63802	-2.13716	-2.23886	-1.99511
YBR127C	VMA2	TFIID	46.8911	415	-0.0817318	-0.0122494	-0.0467511	-1.70107	-1.3985	-0.781304	-2.15727	-1.62495	-1.5265	-1.33423
YFR004W	RPN11	TFIID	46.8089	416	-0.00771817	0.0664504	-0.11433	-1.62468	-1.09811	-0.795271	-2.27231	-1.90812	-2.00361	-2.06696
YGL037C	PNC1	CR	46.5997	417	-0.147371	-1.1202	-1.34615	-4.78158	-3.61824	-3.42944	-0.925315	-0.433233	-0.162511	-1.46232
YLR347C	KAP95	TFIID	46.5735	418	0.0330637	-0.237778	-0.454784	-1.90214	-1.87639	-1.51997	-2.36404	-2.144	-2.41003	-2.08256
YJL127C-B	YJL127C-B	TFIID	46.3292	419	-0.412405	0.142537	0.00250287	-1.26037	-0.912385	-0.36928	-2.05805	-2.21229	-1.695	-1.71658
YFL045C	SEC53	TFIID	46.1802	420	-0.510294	-0.141833	-0.168892	-1.46657	-1.64985	-1.09632	-1.78858	-1.60722	-1.27134	-1.28292
YPR110C	RPC40	TFIID	46.1764	421	-0.19241	0.167355	-0.0272371	-1.00995	-1.43903	-0.917402	-2.52043	-1.99062	-2.08445	-1.799
YDL160C	DHH1	TFIID	45.9542	422	0.0459176	0.00178077	-0.152459	-1.90189	-1.30314	-0.794246	-1.67479	-1.40886	-1.57998	-1.35301
YIL133C	RPL16A	TFIID	45.9154	423	-0.172501	-0.168752	-0.297401	-1.04374	-1.68239	-1.17813	-2.89836	-1.9809	-1.76913	-1.67582
YML073C	RPL6A	TFIID	45.8798	424	-0.167654	-0.14276	-0.247321	-1.47269	-1.71364	-1.41537	-2.63094	-1.62425	-1.53168	-1.3184
YER122C	GLO3	TFIID	45.752	425	-0.113887	0.0812122	0.0635869	-1.61126	-1.33932	-0.878629	-2.09465	-1.71313	-1.85794	-2.00384
YDR496C	PUF6	TFIID	45.7174	426	-0.019058	0.270453	0.192505	-0.778943	-1.44056	-0.967613	-2.72127	-2.29873	-2.28763	-2.16353
YNL087W	TCB2	CR	45.7123	427	-0.0379838	-0.958786	-0.518853	-2.0495	-2.4018	-2.0075	-0.451526	-0.807933	-0.563	-0.798131
YLR060W	FRS1	TFIID	45.6886	428	-0.0727695	0.0806121	-0.0947838	-1.57673	-1.49304	-1.05207	-2.18363	-1.64438	-1.82955	-1.715
YKL039W	PTM1	CR	45.6497	429	-0.234151	-0.300585	-0.23287	-1.72255	-1.54624	-1.01766	-1.39359	-1.3944	-1.30011	-1.38616
YHR052W	CIC1	TFIID	45.5409	430	-0.169185	0.150632	0.143311	-0.957119	-1.60414	-1.09921	-2.64274	-2.2415	-2.29135	-2.08186
YCR053W	THR4	TFIID	45.4498	431	-0.0774703	0.268873	2.07e-05	-1.14856	-1.19813	-1.03349	-2.39658	-1.96285	-1.83079	-1.7265
YMR002W	MIX17	CR	45.3838	432	-0.0856044	-0.113616	-0.23071	-1.27602	-0.972581	-0.579865	-0.592383	-0.865288	-0.424009	-1.37405
YER070W	RNR1	CR	45.3652	433	-0.300388	-1.15546	-1.33514	-2.6772	-2.99113	-2.33419	-0.774121	-0.448898	-0.367049	-0.729802
YPL220W	RPL1A	TFIID	45.2484	434	-0.128952	0.0259765	-0.249664	-1.10737	-1.34123	-0.705231	-2.52459	-1.96187	-1.65991	-1.05966
YGL207W	SPT16	TFIID	45.1878	435	-0.00984294	-0.00194868	-0.0241801	-1.59378	-1.28164	-0.76897	-1.89144	-1.79779	-1.94465	-1.73121
YER073W	ALD5	CR	45.0973	436	-0.303967	-0.710796	-0.598678	-0.836655	-1.19716	-1.2801	-1.01297	-0.357376	-0.444065	-0.57731
YOR335C	ALA1	TFIID	44.9894	437	-0.101125	-0.084762	-0.159979	-1.28566	-1.6021	-1.09958	-2.78159	-2.15453	-2.27684	-1.84466
YFL031W	HAC1	CR	44.9817	438	-0.0212754	-0.0612194	-0.179841	-1.10729	-1.17757	-0.634666	-1.78066	-0.817285	-0.98717	-1.22524
YCR009C	RVS161	TFIID	44.942	439	-0.134053	-0.190779	-0.276359	-1.89239	-1.57762	-1.20184	-2.29818	-1.74568	-1.85631	-1.81196
YLL050C	COF1	TFIID	44.8905	440	0.0327483	-0.167808	-0.187075	-1.59669	-1.23801	-0.775808	-2.57519	-1.92975	-1.59065	-1.47148
YBL056W	PTC3	TFIID	44.8056	441	-0.0547309	-0.00243254	-0.145912	-1.95804	-1.09701	-0.615253	-2.11288	-1.73507	-1.91812	-1.75131
YNL190W	YNL190W	CR	44.6982	442	-0.0961907	-0.342728	-0.679905	-1.57281	-2.0128	-1.33507	-1.3501	-0.759815	-0.580628	-1.00693
YNL229C	URE2	TFIID	44.6608	443	-0.0977798	0.0130927	-0.0535076	-1.03321	-1.4838	-0.918058	-2.62773	-2.38224	-2.40008	-2.11393
YPR187W	RPO26	TFIID	44.5952	444	-0.145157	0.0899735	0.0331541	-1.32633	-1.16748	-0.64865	-2.6667	-1.9956	-1.50595	-1.80259
YLR448W	RPL6B	TFIID	44.5317	445	-0.231799	-0.146155	-0.314057	-1.37846	-1.84171	-1.29323	-2.69582	-1.93022	-1.99877	-1.61606
YIL051C	MMF1	CR	44.5301	446	-0.145765	-0.695016	-0.756842	-2.08934	-1.80181	-1.51453	-0.794986	-0.357337	-0.333569	-0.336592
YJR105W	ADO1	TFIID	44.5032	447	-0.140159	0.274296	0.00836346	-1.25486	-1.57662	-1.09467	-2.18152	-1.74649	-1.75712	-1.56939
YER133W	GLC7	TFIID	44.2916	448	-0.0515746	-0.244187	-0.47976	-1.80202	-1.43261	-1.09682	-2.34517	-1.98631	-1.82049	-1.94494
YGL103W	RPL28	TFIID	44.1795	449	-0.085532	0.0199625	-0.0936833	-0.407151	-0.747415	-0.276745	-1.63727	-1.64534	-1.42581	-1.22897
YNL308C	KRI1	TFIID	44.1305	450	-0.181483	0.303984	0.426519	-0.893195	-1.21771	-0.675513	-2.477	-1.90441	-2.04639	-1.92812
YLR061W	RPL22A	TFIID	44.0933	451	-0.107182	-0.0696541	-0.310699	-0.965028	-1.50834	-1.07648	-2.59142	-2.13131	-1.84358	-1.46357
YNL153C	GIM3	TFIID	44.0644	452	-0.115778	0.0984372	0.152959	-1.3507	-1.20638	-0.890512	-2.88437	-2.46818	-2.15446	-2.4699
YMR308C	PSE1	TFIID	44.031	453	-0.0406132	0.220916	-0.0150764	-1.42859	-1.45225	-1.03014	-2.4302	-2.12941	-2.21835	-1.94229
YPL210C	SRP72	TFIID	44.0176	454	-0.0713395	0.155243	0.106375	-1.62987	-1.18767	-0.837229	-2.02883	-1.97444	-1.88734	-1.69967
YDR429C	TIF35	TFIID	43.9886	455	-0.222378	0.136679	0.0452512	-1.36493	-1.3968	-0.770604	-2.35689	-1.79801	-2.03386	-2.05131
YDR447C	RPS17B	TFIID	43.9235	456	-0.0489851	-0.18921	-0.17538	-0.997502	-1.67822	-1.22062	-2.82852	-2.01842	-1.93359	-1.16015
YOR361C	PRT1	TFIID	43.8914	457	-0.014266	0.121491	-0.0216425	-1.25129	-1.42466	-1.05612	-2.27628	-2.00551	-2.08559	-1.8718
YNL110C	NOP15	TFIID	43.8848	458	-0.231192	0.294222	0.319592	-0.964661	-1.49747	-0.790002	-2.84685	-2.24397	-2.6261	-2.2102
YDR341C	YDR341C	TFIID	43.8817	459	-0.0339393	0.0647183	0.0211854	-0.86383	-1.61928	-1.37244	-2.13027	-1.66557	-1.59416	-1.47761
YGR279C	SCW4	CR	43.8233	460	-0.201333	-0.429536	-0.45905	-1.58622	-1.81216	-1.40491	-1.64326	-0.739717	-0.753069	-0.73849
YKL117W	SBA1	TFIID	43.7536	461	-0.110749	-0.0834268	-0.350323	-1.76847	-1.32804	-0.942787	-1.98238	-1.761	-1.42153	-1.33031
YHR064C	SSZ1	TFIID	43.7499	462	-0.0969594	0.113533	-0.0226193	-1.27882	-1.35578	-0.909197	-2.14209	-1.62906	-1.83713	-1.46236
YOR355W	GDS1	TFIID	43.736	463	-0.025476	0.529032	0.540961	-0.683241	-0.118471	0.246577	-3.00878	-2.9219	-2.58393	-2.36055
YBR121C	GRS1	TFIID	43.6293	464	-0.136073	0.203077	-0.0304396	-1.39439	-1.27804	-0.858052	-2.52216	-1.81693	-1.77832	-1.71523
YNL189W	SRP1	TFIID	43.5531	465	-0.141383	0.0674326	-0.0126754	-1.46013	-1.35188	-0.929065	-1.86476	-1.84127	-1.9869	-1.68255
YDR368W	YPR1	TFIID	43.4924	466	0.0472489	-0.47086	-0.6685	-1.95316	-2.0395	-1.73722	-2.49551	-2.21634	-2.18666	-1.88351
YNL241C	ZWF1	CR	43.4656	467	0.119081	-1.20309	-1.3277	-2.16196	-2.40574	-1.98429	-0.143682	-0.0867134	-0.107549	-0.768614
YOL121C	RPS19A	TFIID	43.4644	468	-0.178617	-0.0792877	-0.167302	-1.05786	-1.44794	-1.15432	-2.61036	-1.73348	-1.59167	-1.25034
YKL103C	APE1	CR	43.4597	469	0.0695125	-0.966957	-1.20554	-2.76594	-1.64467	-1.53412	-0.946273	-0.543067	-0.443644	-0.999795
YLR287C-A	RPS30A	CR	43.3456	470	-0.174045	-0.213082	-0.457656	-1.14214	-1.66435	-1.52576	-2.13052	-1.51516	-1.24322	-0.989723
YNL096C	RPS7B	TFIID	43.3336	471	-0.140752	-0.174601	-0.263192	-1.41446	-1.64608	-1.31009	-2.73285	-2.17881	-2.2198	-2.01645
YHL034C	SBP1	TFIID	43.3237	472	-0.0454349	0.0773289	-0.0510871	-1.86482	-1.47587	-0.955087	-2.4037	-1.52588	-1.37836	-1.50094
YLR455W	PDP3	TFIID	43.2077	473	0.000284471	-0.160884	-0.214268	-1.75636	-0.98055	-0.635638	-2.1935	-2.33949	-2.2656	-2.48156
YNL070W	TOM7	TFIID	43.1363	474	-0.346491	0.285628	0.160728	-1.37073	-0.684998	-0.403009	-2.05028	-1.75655	-1.04039	-1.94358
YIL148W	RPL40A	TFIID	43.1052	475	-0.270473	-0.0990738	-0.290311	-1.24755	-1.67341	-1.40537	-2.5872	-1.65982	-1.60023	-1.24233
YER009W	NTF2	TFIID	43.0926	476	-0.109755	-0.0586266	-0.0422251	-1.32005	-1.20252	-0.894194	-1.8783	-1.56124	-1.50694	-1.23935
YJR122W	IBA57	TFIID	43.0872	477	0.0693803	-0.309776	-0.413073	-1.38111	-1.51721	-1.23926	-1.73725	-1.97349	-1.79161	-1.9312
YHR183W	GND1	CR	43.0061	478	-0.207872	-0.337739	-0.607328	-1.92991	-1.73375	-1.28749	-2.21979	-1.3806	-1.23957	-1.39257
YNL104C	LEU4	CR	42.939	479	0.0112009	-0.125191	-0.512745	-0.286826	-0.696568	-0.556056	-0.617826	-0.10151	-0.103009	-0.296912
YGR094W	VAS1	TFIID	42.9053	480	-0.0658738	0.10393	-0.0588851	-1.18807	-1.33449	-0.882151	-2.69184	-1.97295	-2.02252	-1.67154
YDR158W	HOM2	CR	42.7941	481	-0.255936	0.0124819	-0.215861	-0.240152	-1.26234	-1.21935	-1.65892	-0.835219	-0.730166	-0.935441
YPL260W	YPL260W	TFIID	42.7894	482	-0.139541	0.018986	0.0787821	-2.01742	-1.20161	-0.720017	-1.80783	-1.55015	-1.71161	-1.71903
YAL025C	MAK16	TFIID	42.7824	483	-0.19762	0.287948	0.382592	-0.832026	-1.50541	-0.996418	-2.61095	-2.01173	-2.46047	-2.14541
YDR238C	SEC26	TFIID	42.7779	484	-0.0573087	0.0765236	-0.0619574	-1.85743	-1.20148	-0.62094	-2.0576	-1.87991	-1.88642	-1.70037
YPR024W	YME1	TFIID	42.6131	485	0.023494	-0.241268	-0.262733	-1.73317	-1.48281	-0.959684	-2.32509	-2.00331	-2.21345	-1.99225
YPR181C	SEC23	TFIID	42.4707	486	0.00450751	-0.00586424	-0.366922	-1.65283	-1.58966	-1.07608	-2.39101	-2.1758	-2.06509	-1.8546
YNL118C	DCP2	TFIID	42.4497	487	-0.0253494	-0.0725175	-0.124728	-1.79397	-1.41578	-0.882956	-1.80506	-1.57749	-1.7853	-1.6773
YKR008W	RSC4	TFIID	42.4408	488	-0.0547881	-0.075916	0.186046	-2.04393	-1.39435	-0.820786	-1.70589	-1.70797	-1.91041	-1.90654
YER090W	TRP2	TFIID	42.403	489	0.0164217	-0.062776	-0.01612	-1.11931	-1.28125	-0.941491	-1.55453	-1.39344	-1.21436	-1.61007
YOR117W	RPT5	TFIID	42.383	490	0.0151301	0.0183101	-0.216748	-1.42728	-1.36741	-0.871204	-2.1839	-1.60394	-1.71293	-1.8053
YGR034W	RPL26B	TFIID	42.3781	491	0.00672535	-0.0920125	-0.297044	-1.03245	-1.58956	-1.04178	-2.76188	-1.91524	-1.66451	-1.11233
YNL212W	VID27	TFIID	42.3497	492	0.120825	-0.505653	-0.450152	-1.89578	-1.50742	-1.16502	-2.17196	-2.00223	-2.03556	-1.7148
YMR229C	RRP5	TFIID	42.3195	493	-0.0656224	0.265072	0.194023	-1.1968	-1.37696	-0.879748	-2.26615	-1.73827	-1.8357	-1.67063
YAL016W	TPD3	TFIID	42.2778	494	-0.0211764	0.00404233	-0.105957	-1.86072	-1.14633	-0.731975	-1.84858	-1.8545	-1.79075	-1.72164
YMR161W	HLJ1	TFIID	42.2408	495	0.0347917	0.142511	0.0618675	-1.60637	-0.86855	-0.420544	-2.37278	-2.09821	-2.11807	-2.16465
YFR052W	RPN12	TFIID	42.2014	496	-0.167139	-0.209898	-0.35337	-1.74396	-1.47113	-1.07999	-1.90238	-1.67282	-1.66081	-2.00188
YNL066W	SUN4	CR	42.1381	497	-0.0988065	-0.765849	-0.896566	-2.41642	-3.28466	-2.6758	-0.945495	-0.378054	-0.392773	-0.720481
YFL016C	MDJ1	TFIID	42.0716	498	-0.00312133	0.164498	0.0481455	-2.27882	-1.92779	-1.6035	-2.92495	-2.97971	-2.69059	-2.53243
YNL113W	RPC19	TFIID	42.0443	499	-0.216516	0.178976	0.119478	-0.684325	-1.51571	-0.802657	-2.59947	-2.11285	-2.04001	-2.11865
YOR168W	GLN4	TFIID	41.9934	500	-0.061534	0.192367	0.0220608	-1.13435	-1.11078	-0.597729	-2.17015	-2.10174	-2.20975	-1.64499
YPL204W	HRR25	TFIID	41.8923	501	-0.0203477	0.0275049	-0.0334136	-1.49238	-1.33689	-0.881888	-2.03427	-1.94472	-2.14267	-1.94002
YGL190C	CDC55	TFIID	41.7294	502	0.0909232	0.17758	0.105676	-1.82119	-1.04868	-0.688035	-2.0196	-2.00242	-2.05874	-2.09501
YOR370C	MRS6	TFIID	41.7121	503	0.0756529	0.090355	-0.102873	-1.29459	-1.40159	-1.10891	-1.7251	-1.54902	-1.5416	-1.49987
YDR151C	CTH1	TFIID	41.7029	504	-0.0516197	0.418362	0.199277	-1.72496	-1.28407	-0.948844	-2.09403	-2.28615	-2.07927	-1.93465
YKR057W	RPS21A	TFIID	41.443	505	-0.217366	0.0344554	-0.0629005	-0.898033	-1.31601	-0.837605	-2.74687	-1.77267	-1.68457	-1.37438
YER087C-B	SBH1	TFIID	41.4188	506	-0.279443	-0.089086	-0.162956	-1.91883	-1.44358	-1.07243	-2.56107	-1.67109	-1.69186	-1.72985
YDR035W	ARO3	TFIID	41.2765	507	0.0386409	0.0627504	-0.091674	-0.661574	-1.03607	-0.858529	-2.41135	-1.51434	-1.53345	-1.32889
YOR267C	HRK1	TFIID	41.2199	508	0.0520789	-0.17056	-0.188489	-2.06492	-1.86024	-1.41751	-2.0762	-1.7186	-1.75557	-2.06531
YLR413W	INA1	CR	41.2085	509	-0.312542	-1.43488	-1.41725	-2.79036	-2.8839	-2.40784	-1.97199	-0.372117	-0.390511	-0.680998
YBL072C	RPS8A	TFIID	41.1978	510	-0.128809	-0.0936471	-0.480018	-1.3752	-1.57178	-1.27622	-2.55622	-1.67839	-1.64073	-1.29427
YEL065W	SIT1	CR	41.1725	511	-0.8836	-1.16455	-0.887446	-1.3435	-2.54669	-2.32631	-1.23871	-1.13517	-0.7008	-1.19017
YBR154C	RPB5	TFIID	41.0506	512	-0.209585	0.170456	-0.0370192	-1.08469	-1.70909	-1.23583	-2.75017	-2.04787	-1.97781	-1.95149
YGR116W	SPT6	TFIID	41.023	513	-0.0658862	0.203774	0.104058	-1.88551	-0.96786	-0.430179	-2.14651	-1.6477	-1.81036	-1.59687
YOL136C	PFK27	CR	41.0205	514	0.129886	-0.612418	-0.716554	-1.63847	-2.10884	-1.87953	-1.23717	-0.909431	-1.01069	-0.950404
YPL078C	ATP4	TFIID	41.0152	515	-0.0662033	-0.011865	-0.197885	-1.70061	-0.897287	-0.511193	-1.95861	-1.37855	-1.2943	-1.47141
YJL109C	UTP10	TFIID	41.0091	516	-0.0407963	-0.0169686	-0.112116	-0.95976	-1.55066	-1.07581	-2.31859	-2.20956	-2.26002	-1.93866
YMR235C	RNA1	TFIID	40.9658	517	-0.00957715	0.163144	0.0991367	-1.49599	-1.25835	-0.817348	-2.48817	-1.6861	-1.56704	-1.81741
YDR091C	RLI1	TFIID	40.9523	518	-0.190493	0.138438	0.0149863	-1.16427	-1.518	-1.06078	-1.921	-1.88227	-1.83644	-1.61377
YBL099W	ATP1	TFIID	40.8519	519	-0.0160917	0.0485594	-0.2734	-1.6282	-0.722517	-0.463664	-1.82862	-1.13087	-1.08593	-1.22922
YPR036W	VMA13	TFIID	40.8176	520	-0.202364	-0.111438	-0.2234	-1.70852	-1.62376	-1.23462	-2.92426	-2.1586	-2.17894	-2.11683
YOL154W	ZPS1	CR	40.8103	521	-0.281437	-1.44511	0.171292	-3.58741	-2.18461	-1.28194	-1.93538	2.63666	1.9965	2.33506
YLR051C	FCF2	TFIID	40.7472	522	-0.177953	0.231939	0.492217	-0.819816	-1.11598	-0.690381	-1.9449	-2.01696	-1.97381	-1.8893
YNL002C	RLP7	TFIID	40.7342	523	-0.176364	0.0748583	0.189964	-0.798745	-1.35746	-0.878168	-2.7323	-2.76934	-2.24855	-2.21274
YKR095W	MLP1	TFIID	40.6997	524	-0.0602996	0.124906	0.0969188	-1.78577	-0.911362	-0.395837	-1.76094	-1.55177	-1.80075	-1.57968
YBR034C	HMT1	TFIID	40.6048	525	-0.228312	0.0760385	0.0135844	-0.876951	-1.84195	-1.35412	-2.28744	-2.0836	-1.8771	-1.66896
YDL140C	RPO21	TFIID	40.5178	526	0.0244611	-0.008904	-0.245497	-1.65627	-1.60163	-0.991739	-1.88538	-1.62769	-1.66657	-1.61687
YDR394W	RPT3	TFIID	40.4267	527	-0.0247096	-0.0911279	-0.216426	-1.60875	-1.69466	-1.18688	-2.07865	-1.90799	-1.89366	-2.00107
YPL117C	IDI1	TFIID	40.3178	528	-0.177859	-0.311453	-0.415539	-1.10421	-1.94883	-1.73506	-2.73935	-2.17602	-1.79352	-1.90107
YGR135W	PRE9	TFIID	40.3106	529	-0.113698	-0.0360978	-0.339108	-1.45744	-1.35873	-0.802892	-2.10045	-1.60611	-1.54954	-1.81962
YNL085W	MKT1	TFIID	40.2837	530	-0.0626728	0.0886899	-0.0109825	-1.64779	-1.1382	-0.616621	-1.96037	-1.66345	-1.80101	-1.50898
YLR064W	PER33	CR	40.2757	531	-0.0111778	-0.280872	-0.321286	-1.7128	-1.81539	-1.37756	-1.49136	-1.56556	-1.33897	-1.3074
YML012W	ERV25	TFIID	40.2596	532	-0.257761	0.13287	0.0499045	-1.74174	-1.2991	-0.807476	-2.40287	-1.77841	-1.58383	-1.74054
YBL041W	PRE7	TFIID	40.1567	533	-0.00715855	-0.0769308	-0.377743	-1.25592	-1.74761	-1.29557	-2.05397	-2.01412	-1.5607	-2.08305
YKL210W	UBA1	TFIID	40.1471	534	0.0907699	-0.0173985	-0.131702	-1.86866	-1.59128	-0.975693	-2.13864	-1.6059	-1.57718	-1.30735
YGL011C	SCL1	TFIID	40.0545	535	-0.0658364	-0.0738567	-0.195245	-1.56698	-1.40855	-0.887946	-2.16207	-2.14833	-2.29834	-1.98002
YDR471W	RPL27B	TFIID	40.005	536	-0.221503	-0.144084	-0.293135	-1.04151	-1.55516	-1.1907	-3.12227	-2.15235	-1.87145	-1.73644
YGR124W	ASN2	TFIID	39.9751	537	0.00514654	0.0972983	-0.305138	-0.776593	-1.49195	-1.17779	-3.02289	-2.01626	-1.96543	-1.84205
YOR332W	VMA4	TFIID	39.9429	538	-0.195454	-0.0358286	0.146172	-1.69393	-1.23202	-0.851964	-2.26698	-1.36696	-1.67905	-1.135
YER002W	NOP16	TFIID	39.8137	539	-0.170496	0.247761	0.2927	-0.852794	-1.20174	-0.704577	-2.12132	-2.0202	-1.87838	-1.90963
YJL189W	RPL39	TFIID	39.8013	540	-0.195438	-0.0608557	0.0764743	-0.694529	-1.15044	-0.563742	-2.32448	-1.80083	-1.73865	-1.12707
YKL178C	STE3	CR	39.7304	541	-0.143809	-0.647276	-1.23554	-1.69333	-4.53009	-4.05794	-2.75029	-0.811211	-0.932286	-0.998987
YFL004W	VTC2	CR	39.596	542	-0.196272	0.000877439	-0.0924057	-3.19089	-2.77443	-2.26441	-2.0183	-1.96909	-1.87855	-1.83365
YDL145C	COP1	TFIID	39.5844	543	-0.0634683	0.0714487	-0.140177	-1.74381	-1.19527	-0.745929	-1.88505	-1.53983	-1.61454	-1.53363
YGL195W	GCN1	TFIID	39.5406	544	-0.0508629	0.245252	0.0309004	-1.54208	-1.13684	-0.621207	-2.08702	-1.50932	-1.50279	-1.45522
YJL052W	TDH1	CR	39.5133	545	0.243155	-3.00878	-3.88422	-5.81657	-4.8836	-4.44528	0.406255	1.23385	1.17545	0.342643
YMR143W	RPS16A	TFIID	39.4588	546	-0.129626	-0.128414	-0.218919	-1.16876	-1.75773	-1.38241	-2.25369	-1.8451	-1.39771	-1.2229
YML007W	YAP1	CR	39.4564	547	0.239061	-0.10305	-0.329609	-1.19572	-1.4413	-1.13196	-0.578158	-0.796843	-0.679827	-1.14121
YDR077W	SED1	CR	39.419	548	-0.160068	-0.705002	-0.748634	-2.10433	-2.65972	-1.72239	-0.937353	-0.180531	-0.182303	-0.862619
YMR079W	SEC14	TFIID	39.2031	549	-0.176371	0.0284291	-0.243932	-1.55958	-1.40884	-0.908375	-2.39349	-2.15024	-1.97263	-1.79676
YDR270W	CCC2	CR	39.1586	550	-0.438697	-0.768673	-0.516853	-1.61698	-2.33697	-2.11047	-0.527463	-0.858385	-0.643385	-1.15125
YJR063W	RPA12	TFIID	39.1448	551	-0.238185	0.102058	-0.0819759	-0.857334	-1.37589	-0.818759	-3.07016	-2.1592	-2.25999	-2.80081
YDR214W	AHA1	CR	39.1003	552	-0.00599959	0.108222	-0.199995	-2.37405	-2.03765	-1.60159	-1.39933	-1.30834	-1.44759	-1.28814
YPR103W	PRE2	TFIID	39.0725	553	0.0140357	-0.126734	-0.240749	-1.58386	-1.52799	-0.91781	-2.01855	-1.921	-1.71911	-1.73749
YDR365C	ESF1	TFIID	39.0676	554	-0.216155	0.209308	0.194978	-0.759306	-1.04531	-0.503826	-1.78268	-0.724376	-1.16059	-1.30555
YCL043C	PDI1	CR	39.0158	555	-0.102855	-0.377485	-0.705996	-2.08059	-1.89832	-1.35168	-1.73222	-1.49668	-1.47097	-1.37554
YOL120C	RPL18A	TFIID	39.0024	556	-0.280126	0.00355564	-0.343078	-0.998231	-1.51713	-1.15975	-2.4682	-1.84474	-1.53867	-1.24562
YGL173C	XRN1	TFIID	38.8726	557	0.0295858	0.0563305	-0.113832	-1.98255	-1.4951	-0.843373	-1.73351	-1.65706	-1.74154	-1.45552
YGL122C	NAB2	TFIID	38.7672	558	-0.0932311	-0.257782	-0.366302	-1.78938	-1.42255	-1.02179	-2.11157	-2.12142	-2.29584	-2.14652
YDL235C	YPD1	TFIID	38.6207	559	-0.136162	0.0481377	-0.0939129	-1.58992	-0.943709	-0.870701	-2.40636	-1.95891	-2.24816	-1.85109
YDL075W	RPL31A	TFIID	38.6087	560	-0.087687	-0.0416693	-0.120044	-1.27784	-1.6837	-1.1961	-2.4617	-1.49494	-1.59662	-1.12859
YLR276C	DBP9	TFIID	38.578	561	-0.170807	0.246396	0.397805	-0.807146	-1.23502	-0.87275	-2.51724	-2.19583	-2.21583	-2.07978
YER012W	PRE1	TFIID	38.5774	562	-0.0523583	-0.172115	-0.333021	-1.68241	-1.42529	-0.987368	-2.19346	-1.91682	-1.82013	-2.12319
YPL212C	PUS1	TFIID	38.5522	563	-0.061285	0.0580059	0.128722	-0.882519	-1.22114	-0.819888	-2.44614	-2.16414	-2.27009	-2.13889
YKL184W	SPE1	TFIID	38.5503	564	-0.0543738	-0.194473	-0.189092	-1.0986	-1.56216	-1.12691	-2.59294	-2.21667	-2.10515	-1.80327
YMR230W	RPS10B	TFIID	38.5223	565	-0.148881	-0.0821965	-0.134005	-1.14454	-1.40168	-1.0035	-2.5922	-1.93545	-1.75387	-1.36706
YDL029W	ARP2	CR	38.4727	566	-0.0716528	-0.114079	-0.339672	-2.17343	-1.72493	-1.28976	-1.59651	-1.59552	-1.35873	-1.42466
YLR447C	VMA6	TFIID	38.4096	567	-0.107043	0.0761762	-0.0545002	-1.60843	-1.06939	-0.905368	-1.98233	-1.60646	-1.74901	-1.53391
YNL024C-A	KSH1	TFIID	38.4002	568	-0.190323	0.136233	0.0217249	-0.780717	-0.848568	-0.568938	-2.87348	-2.91773	-2.03863	-2.2384
YJR117W	STE24	TFIID	38.134	569	0.00271495	0.0517015	-0.119019	-1.82799	-1.58225	-1.01714	-2.03796	-1.81436	-1.94633	-1.7959
YPL249C-A	RPL36B	TFIID	38.126	570	-0.514713	-0.0602958	-0.251829	-1.15396	-1.68462	-1.16833	-2.47317	-1.28086	-1.60315	-0.91561
YKL057C	NUP120	TFIID	38.1123	571	0.151721	-0.0709727	-0.0169017	-1.77336	-1.34088	-0.824758	-1.81673	-1.97005	-1.86882	-1.83231
YLR257W	YLR257W	TFIID	38.0754	572	0.172594	-0.146099	-0.945624	-1.78814	-0.878642	-0.507414	-1.89992	-0.90028	-1.00667	-1.48465
YOR039W	CKB2	TFIID	38.0654	573	-0.0916121	-0.0160453	-0.163213	-1.68113	-1.41374	-1.0795	-2.6448	-2.3153	-1.76887	-2.06809
YDR346C	SVF1	TFIID	38.0566	574	-0.00977526	-0.102116	-0.0997067	-1.14252	-1.35245	-0.911165	-2.05245	-2.07014	-2.05199	-1.60225
YPL043W	NOP4	TFIID	38.0329	575	-0.149873	0.290034	0.367585	-0.937415	-1.52206	-0.844137	-2.54947	-2.18357	-2.40151	-2.04709
YOR360C	PDE2	TFIID	38.027	576	0.0301811	0.0949575	0.0281474	-0.820059	-0.903867	-0.709655	-1.66673	-1.76256	-1.67389	-1.34819
YGL029W	CGR1	TFIID	38.0171	577	-0.304217	0.114044	0.356863	-1.07167	-1.38425	-0.606619	-2.60279	-2.77201	-1.89783	-2.99323
YFR040W	SAP155	TFIID	38.0161	578	-0.00564083	-0.0150422	-0.0499546	-1.81527	-1.23753	-0.705336	-1.8776	-1.52116	-1.8359	-1.76342
YNL248C	RPA49	TFIID	37.9819	579	-0.132961	0.178048	0.105738	-0.832933	-1.5061	-1.09374	-2.51385	-2.16616	-2.25416	-2.01335
YDL007W	RPT2	TFIID	37.9744	580	0.00744414	0.00382566	-0.153145	-1.6407	-1.47108	-1.04473	-2.1184	-1.86907	-1.90066	-1.92406
YML024W	RPS17A	TFIID	37.9693	581	-0.0706217	-0.139051	-0.218047	-1.33597	-1.79883	-1.35454	-2.68136	-1.78542	-1.6075	-0.941187
YOL027C	MDM38	TFIID	37.9097	582	-0.0312136	0.225492	0.279214	-1.22598	-0.864985	-0.305759	-2.14827	-1.98034	-2.20014	-2.06169
YBL024W	NCL1	TFIID	37.8816	583	-0.145021	0.172643	0.110969	-1.4736	-1.22936	-0.723385	-2.3297	-1.96065	-1.9536	-1.75453
YER103W	SSA4	TFIID	37.8749	584	0.217772	0.548844	0.322227	-2.78699	-1.80391	-1.48883	-1.58374	-1.81385	-1.89746	-2.24118
YIL126W	STH1	TFIID	37.8082	585	-0.0482614	0.216742	0.164594	-2.06226	-1.11422	-0.390855	-2.90961	-2.36091	-2.64674	-2.36915
YPL050C	MNN9	TFIID	37.7868	586	-0.0150727	0.215814	-0.0362738	-1.56927	-1.2955	-0.729567	-2.08661	-1.80469	-1.61206	-1.79348
YOR259C	RPT4	TFIID	37.7834	587	-0.0552463	-0.0717967	-0.199143	-1.57652	-1.63091	-1.08039	-2.23245	-1.67678	-1.97651	-1.84399
YDR174W	HMO1	TFIID	37.7757	588	-0.257045	0.233468	0.287814	-1.17915	-1.12849	-0.609	-2.11634	-2.01437	-1.98066	-1.65411
YMR188C	MRPS17	TFIID	37.7726	589	-0.0454342	0.0850493	0.0869475	-1.56249	-1.11053	-0.648571	-1.92662	-1.82605	-1.73078	-2.1061
YOL145C	CTR9	TFIID	37.7375	590	-0.0751886	0.0656827	0.0611742	-1.75407	-1.28033	-0.714167	-2.40288	-1.69349	-2.05059	-1.77045
YDR299W	BFR2	TFIID	37.7155	591	-0.135617	0.277288	0.500103	-0.920416	-1.26123	-0.61123	-2.18587	-1.78396	-2.02826	-1.70493
YGR020C	VMA7	TFIID	37.6743	592	-0.263673	-0.141965	-0.291898	-1.6293	-1.25682	-0.952248	-2.65544	-1.83277	-1.89624	-1.67823
YPR072W	NOT5	TFIID	37.6621	593	-0.0682577	0.074848	0.176422	-1.73476	-1.0077	-0.4774	-1.78652	-1.70212	-2.01351	-1.75839
YDR212W	TCP1	TFIID	37.6321	594	-0.0320017	0.157126	-0.105373	-1.69231	-1.349	-0.824586	-2.3789	-1.89174	-1.99773	-2.03021
YKL054C	DEF1	CR	37.5941	595	0.0508247	0.195496	0.272135	-1.41078	-1.63604	-1.06872	-0.965726	-1.05773	-1.52271	-1.07155
YLR292C	SEC72	TFIID	37.5847	596	-0.18002	0.0891799	0.0785391	-1.28847	-1.21773	-0.741924	-2.00471	-1.70228	-1.56885	-1.35273
YPL179W	PPQ1	TFIID	37.5798	597	0.00125125	-0.00524156	0.0795943	-1.56034	-1.39856	-0.939517	-1.74975	-1.7614	-1.77975	-1.68002
YMR217W	GUA1	TFIID	37.5516	598	-0.173574	0.0315642	-0.0529895	-0.472769	-1.75051	-1.38082	-2.36069	-1.68481	-1.76291	-1.46983
YIL035C	CKA1	TFIID	37.5053	599	-0.0785645	0.0846616	0.184985	-1.49106	-1.09244	-0.508124	-1.9267	-1.88535	-1.50448	-1.71645
YDR381W	YRA1	CR	37.4927	600	-0.116459	-0.571531	-0.769523	-1.75331	-1.13834	-0.658305	-0.621347	-0.29746	-0.0892726	-0.689996
YHR128W	FUR1	CR	37.3832	601	-0.0572907	-0.383252	-0.769685	-1.38109	-1.83896	-1.51667	-2.09373	-1.49073	-1.15689	-1.51779
YMR146C	TIF34	TFIID	37.3323	602	-0.129075	0.0860129	-0.0961923	-1.59823	-1.51496	-1.01477	-2.89395	-2.35384	-2.27161	-2.1017
YPL190C	NAB3	TFIID	37.3025	603	-0.0112304	0.121339	0.0655089	-1.83458	-1.27702	-0.579065	-1.61223	-1.46959	-1.64061	-1.53636
YJL014W	CCT3	TFIID	37.286	604	-0.119743	0.145297	-0.0655307	-1.4164	-1.15428	-0.784549	-2.03541	-1.98243	-1.99318	-1.88704
YKR052C	MRS4	CR	37.2854	605	0.0392626	0.324786	0.108951	-0.691318	-1.13666	-0.906991	-0.963504	-0.584986	-0.386577	-1.01452
YML103C	NUP188	TFIID	37.2502	606	0.0102392	0.0373929	0.0302123	-1.73656	-1.26664	-0.75567	-1.9881	-1.84179	-1.94099	-1.76372
YPR143W	RRP15	TFIID	37.214	607	-0.26876	0.0424576	0.383525	-1.22022	-1.42328	-0.669043	-2.63689	-2.02779	-2.10268	-2.24517
YMR246W	FAA4	CR	37.1592	608	-0.211166	-1.17046	-1.00975	-2.05443	-2.08058	-1.71535	-1.74375	-0.402142	-0.323216	-0.588714
YNL197C	WHI3	TFIID	37.0655	609	0.0189578	-0.073191	-0.0411458	-2.00095	-1.31821	-0.768147	-1.76523	-1.81962	-1.99743	-1.83399
YKL035W	UGP1	CR	37.0299	610	0.0642776	-0.134926	-0.658812	-2.50298	-0.973938	-0.473461	-1.23858	-0.552736	-0.756104	-1.2911
YPL202C	AFT2	CR	37.0109	611	0.160624	-0.278133	-0.205049	-1.31429	-1.74542	-1.63799	-0.952066	-1.52828	-1.47789	-1.57918
YOR089C	VPS21	TFIID	36.9531	612	-0.0658182	0.0527582	0.109359	-1.41837	-1.39201	-1.03539	-2.12735	-1.87574	-1.65012	-1.72788
YOL077C	BRX1	TFIID	36.91	613	-0.218798	0.258468	0.181656	-1.06911	-1.23725	-0.885403	-2.47296	-2.10254	-2.21072	-1.89553
YBR286W	APE3	CR	36.8851	614	-0.248327	0.0296794	-0.305001	-1.93263	-0.945559	-0.361891	-1.77878	-0.966383	-1.04386	-1.04677
YJL130C	URA2	CR	36.831	615	-0.196419	-0.251767	-0.469014	-1.34944	-1.40603	-1.10331	-1.46112	-1.03555	-1.0445	-1.00782
YGR103W	NOP7	TFIID	36.8217	616	-0.12185	0.176509	0.238809	-0.954082	-1.65268	-1.02107	-2.54637	-2.1451	-2.12617	-1.57715
YER126C	NSA2	TFIID	36.7796	617	-0.230969	0.258188	0.32597	-0.423297	-1.50037	-1.03832	-2.47554	-1.77312	-2.30806	-2.14768
YDR450W	RPS18A	TFIID	36.648	618	-0.18011	-0.016272	-0.416118	-1.00169	-1.90772	-1.24851	-2.78175	-1.95909	-1.45954	-1.17282
YMR183C	SSO2	TFIID	36.6303	619	-0.11851	-0.100397	-0.0157212	-1.75298	-1.43156	-0.855712	-2.17926	-1.65414	-1.89768	-1.539
YKR014C	YPT52	TFIID	36.6249	620	-0.0201655	0.383432	0.132214	-1.35989	-0.758667	-0.248091	-1.94899	-1.81114	-2.15028	-1.79376
YHR196W	UTP9	TFIID	36.5471	621	-0.0652656	0.236347	0.364947	-0.871728	-1.09296	-0.785768	-1.60984	-1.77581	-1.81963	-1.84933
YGR229C	SMI1	TFIID	36.4973	622	-0.105993	-0.0379421	-0.264599	-1.28975	-1.61752	-1.22067	-3.08171	-2.65105	-2.79875	-2.50953
YOL049W	GSH2	TFIID	36.4297	623	0.0100633	-0.00350041	-0.173107	-1.55757	-1.06562	-0.768635	-2.34005	-1.86006	-1.91809	-1.77117
YML074C	FPR3	TFIID	36.4205	624	-0.180872	0.0875032	0.170306	-1.62227	-1.824	-0.766622	-2.56353	-1.47601	-1.58707	-1.67457
YIL118W	RHO3	TFIID	36.3705	625	-0.0371171	0.0797764	-0.188513	-1.50907	-1.32424	-1.03912	-2.57411	-2.23504	-2.18602	-2.14922
YMR131C	RRB1	TFIID	36.3257	626	-0.104857	0.167847	0.0266446	-0.620166	-1.53966	-1.1728	-2.65487	-2.33617	-2.24397	-1.9633
YNL061W	NOP2	TFIID	36.3115	627	-0.179711	0.182154	0.195408	-0.907188	-1.45288	-0.788411	-2.57269	-1.90987	-2.29336	-1.88033
YBR177C	EHT1	CR	36.2995	628	-0.244517	-0.230842	-0.777646	-3.23611	-2.45296	-2.09422	-1.6956	-1.50737	-0.943467	-1.52286
YJL002C	OST1	TFIID	36.243	629	-0.072456	0.0165699	-0.066496	-1.68848	-1.21372	-0.720611	-1.81415	-1.80625	-1.70335	-1.69794
YDR377W	ATP17	TFIID	36.2105	630	-0.0115708	0.224135	-0.0363134	-1.18432	-0.942138	-0.755376	-2.18652	-1.73216	-1.23041	-1.53476
YFL037W	TUB2	TFIID	36.2046	631	-0.119863	-0.0553136	-0.258899	-2.03671	-1.51943	-1.01302	-2.44516	-1.72911	-1.52961	-1.85788
YPL171C	OYE3	CR	36.1209	632	0.250585	-1.48187	-2.08266	-2.45722	-1.67879	-1.54648	-1.22911	-0.376344	-0.228886	-1.00735
YGL238W	CSE1	TFIID	36.0937	633	0.0513333	0.0654824	-0.0439081	-1.64135	-1.22854	-0.806082	-1.82297	-1.9157	-1.86305	-1.6497
YPL178W	CBC2	TFIID	36.0907	634	-0.13722	0.137336	-0.032842	-1.71836	-1.46055	-0.677282	-2.26375	-2.17421	-2.05045	-2.26398
YDL148C	NOP14	TFIID	36.0258	635	-0.0960502	0.306067	0.390196	-0.961276	-1.28792	-0.713445	-2.38399	-2.07995	-2.1701	-1.84244
YIL038C	NOT3	TFIID	35.9454	636	-0.0336713	0.146522	0.0757293	-1.67263	-1.08514	-0.663764	-1.77377	-1.72704	-2.04052	-1.77296
YJL008C	CCT8	TFIID	35.9373	637	-0.0465041	0.0509361	-0.217858	-1.44431	-1.42495	-0.930614	-2.05959	-1.83659	-1.87063	-1.80227
YOR043W	WHI2	TFIID	35.8971	638	0.0853597	-0.113448	-0.331567	-1.48712	-1.60757	-1.23481	-1.52664	-1.94685	-1.44107	-1.96127
YHR094C	HXT1	CR	35.8911	639	0.288631	-1.87739	-1.61694	-1.80967	-3.68237	-3.49141	-0.68158	0.41107	0.694688	-0.205201
YGR185C	TYS1	TFIID	35.88	640	-0.125156	0.090901	-0.119498	-1.33846	-1.36125	-0.925406	-2.15611	-1.59379	-1.61114	-1.78774
YDR190C	RVB1	TFIID	35.8625	641	-0.121545	0.176941	0.116381	-1.50965	-1.31356	-0.732312	-2.24885	-1.83019	-1.9068	-1.96867
YML022W	APT1	TFIID	35.8359	642	-0.109204	0.319954	-0.0447565	-0.164808	-0.887718	-0.64792	-2.18616	-2.11831	-1.72376	-1.76242
YJL177W	RPL17B	TFIID	35.8141	643	-0.0580567	-0.14682	-0.227751	-1.03392	-1.40055	-1.1176	-2.79869	-1.71707	-1.69867	-1.53174
YHR141C	RPL42B	TFIID	35.7803	644	-0.111283	-0.194767	-0.44214	-1.16255	-1.74164	-1.25452	-2.48135	-1.82328	-1.4468	-1.28609
YBR084C-A	RPL19A	TFIID	35.7702	645	-0.193498	-0.206091	-0.115903	-1.21197	-1.40957	-1.06571	-2.43809	-1.76115	-1.91504	-1.45591
YBL022C	PIM1	TFIID	35.7665	646	0.0564748	-0.113017	-0.287401	-1.7817	-1.51274	-0.877094	-1.87424	-1.76523	-2.06892	-1.77196
YDR508C	GNP1	CR	35.7655	647	-0.0450526	-0.818619	-0.845958	-1.57725	-2.27661	-1.90191	-0.924893	-0.470911	-0.413145	-0.800394
YGR017W	YGR017W	TFIID	35.748	648	-0.140537	0.063582	-0.0773717	-1.38872	-1.17748	-0.967631	-3.03433	-2.3235	-2.12328	-2.39865
YFR010W	UBP6	TFIID	35.7217	649	-0.0935966	0.0818998	-0.164515	-1.7826	-1.18087	-0.672285	-1.92393	-1.76297	-1.7454	-1.87041
YDR264C	AKR1	TFIID	35.7139	650	-0.263568	-0.258325	-0.130177	-0.965452	-1.14134	-0.858304	-2.17172	-2.09243	-1.94493	-1.62276
YFL038C	YPT1	TFIID	35.7096	651	-0.124044	0.0201202	-0.132251	-1.6449	-1.56975	-0.99133	-2.60619	-1.97114	-1.50629	-1.81747
YGL077C	HNM1	CR	35.6972	652	-0.00607912	-0.126548	-0.00923888	-3.02739	-1.87553	-1.40424	-1.62207	-1.44959	-1.19339	-1.39881
YHL011C	PRS3	TFIID	35.6898	653	-0.125064	0.207009	-0.000699483	-0.85835	-1.29287	-1.12261	-2.53902	-1.97844	-2.09812	-1.98057
YPL273W	SAM4	TFIID	35.6463	654	-0.105901	0.0794778	-0.0207677	-0.907803	-1.30811	-0.907736	-2.00366	-1.67273	-1.47071	-1.75362
YKL063C	YKL063C	TFIID	35.58	655	-0.0932515	0.0950717	0.113232	-1.65891	-1.22061	-0.734045	-2.10266	-2.54402	-2.4478	-2.45641
YBR130C	SHE3	TFIID	35.4496	656	-0.0542828	-0.0922133	0.0542377	-1.8521	-1.33137	-0.872855	-1.95636	-1.55967	-1.89768	-1.71366
YGR132C	PHB1	TFIID	35.4192	657	-0.0153942	0.104154	-0.087763	-1.40866	-0.894669	-0.556561	-1.8809	-1.83514	-1.66504	-1.54971
YHR170W	NMD3	TFIID	35.3701	658	-0.181527	0.121302	0.187181	-0.79102	-1.61152	-1.16153	-2.62041	-2.43228	-2.49756	-1.97577
YBR049C	REB1	TFIID	35.3434	659	-0.0234933	0.15432	0.20309	-2.14356	-1.5288	-0.952604	-2.09515	-1.86816	-2.03807	-1.65775
YDR395W	SXM1	TFIID	35.3386	660	-0.0513499	0.0856276	-0.0706514	-1.26131	-1.29601	-0.916263	-2.3212	-2.14664	-2.05391	-1.8589
YGR090W	UTP22	TFIID	35.3384	661	-0.00506578	0.14958	0.0713345	-1.50804	-1.35959	-0.848616	-2.20376	-2.20013	-2.25683	-2.00873
YOR078W	BUD21	TFIID	35.3333	662	-0.251449	0.096549	0.134393	-0.958139	-1.24581	-1.04876	-2.72292	-2.10512	-2.41717	-2.46564
YER136W	GDI1	TFIID	35.3252	663	-0.102115	-0.0598081	-0.120115	-1.61533	-1.04449	-0.504491	-2.36191	-1.91549	-2.14479	-1.83617
YDL180W	YDL180W	CR	35.314	664	0.160014	-0.398068	-0.524662	-1.08606	-1.94774	-1.69943	-1.44884	-1.27445	-1.09468	-1.43501
YPR169W	JIP5	TFIID	35.2714	665	0.0263932	0.0603866	0.0485547	-1.11297	-1.14656	-0.766822	-2.0611	-2.00172	-2.10797	-1.77227
YLR033W	RSC58	TFIID	35.2303	666	-0.0446963	0.140713	0.222814	-1.64085	-1.03288	-0.501946	-2.18844	-1.86932	-1.97011	-1.81368
YPR043W	RPL43A	TFIID	35.207	667	-0.138472	-0.106993	-0.320416	-1.21921	-1.71352	-1.08546	-2.09739	-1.73738	-1.45837	-1.20699
YOL041C	NOP12	TFIID	35.1269	668	-0.0767502	0.345549	0.393367	-1.05027	-1.30629	-0.829536	-1.90808	-1.74436	-1.89181	-1.85623
YIL018W	RPL2B	TFIID	35.1124	669	-0.237304	-0.0534331	-0.452956	-1.18278	-1.67218	-1.38526	-2.73775	-1.87841	-1.55659	-1.14207
YMR194W	RPL36A	TFIID	35.0715	670	-0.0895995	-0.170562	-0.151772	-1.18167	-1.25002	-0.852879	-2.30833	-1.79639	-1.63714	-1.35792
YKR028W	SAP190	TFIID	34.9907	671	-0.0343407	-0.0215666	0.00240317	-1.91198	-1.34727	-0.768696	-1.96307	-1.85798	-2.05242	-1.74567
YDR032C	PST2	CR	34.953	672	0.108712	-1.03186	-0.704184	-2.17618	-1.44543	-1.30286	-0.586234	-0.649157	-0.381398	-1.30994
YPL118W	MRP51	TFIID	34.9125	673	-0.109752	0.182366	0.141614	-1.74167	-1.12711	-0.711959	-2.27995	-1.79898	-1.59343	-2.11385
YDL083C	RPS16B	TFIID	34.9115	674	0.00495611	-0.218802	-0.296898	-1.37442	-1.8156	-1.32597	-2.87379	-1.9076	-1.68046	-1.55864
YBR146W	MRPS9	TFIID	34.9018	675	-0.00465893	0.118646	0.0577982	-1.60959	-1.14664	-0.633813	-1.94878	-1.92927	-2.09081	-1.88702
YKL028W	TFA1	TFIID	34.8866	676	-0.0499468	-0.0246892	0.155232	-1.76855	-1.14704	-0.66491	-1.86518	-1.58133	-1.96956	-1.68194
YDR028C	REG1	TFIID	34.8834	677	-0.0579975	0.114141	0.0865286	-1.87714	-1.06661	-0.520685	-2.09932	-1.80231	-2.16896	-1.81008
YKL006W	RPL14A	TFIID	34.8617	678	-0.0683432	-0.112069	-0.237782	-1.06178	-1.57831	-1.26839	-2.47783	-1.73746	-1.55362	-1.11444
YKL179C	COY1	TFIID	34.8113	679	-0.0314774	0.189776	0.165434	-1.772	-0.887031	-0.389397	-2.06418	-1.68484	-2.01925	-1.74431
YGR054W	YGR054W	TFIID	34.8046	680	-0.135374	0.0952445	-0.054941	-1.50261	-1.49333	-1.02634	-2.35755	-2.35601	-2.19169	-2.16901
YJL080C	SCP160	TFIID	34.737	681	-0.0227292	0.0933394	-0.128917	-1.74606	-1.47773	-0.953413	-2.54632	-1.97636	-2.02591	-1.72039
YOR290C	SNF2	TFIID	34.7207	682	-0.00756624	0.00700655	0.0142296	-2.08794	-1.21198	-0.525188	-1.86761	-1.69333	-1.92686	-1.80548
YER056C	FCY2	CR	34.7145	683	-0.0904316	-0.573726	-1.00564	-0.458816	-1.92933	-1.8248	-0.88055	-0.597107	-0.307282	-0.771949
YPL079W	RPL21B	TFIID	34.6079	684	-0.281841	-0.194038	-0.329301	-1.41751	-1.67549	-1.28464	-2.33531	-1.86876	-1.74857	-1.47058
YPL265W	DIP5	CR	34.5541	685	-0.0361604	-0.863563	-1.1349	-1.3229	-2.92059	-2.8052	-0.00647749	0.761191	0.898346	0.0685189
YDL025C	RTK1	CR	34.5226	686	0.181949	-0.322918	-0.325116	-1.65379	-1.45089	-1.2747	-1.37485	-0.837852	-0.742259	-1.45145
YGL009C	LEU1	TFIID	34.5219	687	-0.250811	0.830941	0.0298179	0.741298	1.27949	1.4277	-0.650702	-0.744707	-1.02018	-0.815426
YHR135C	YCK1	TFIID	34.4844	688	-0.131626	-0.0199078	-0.090441	-1.79713	-1.36047	-0.733231	-2.3892	-1.97954	-2.32974	-2.1273
YER074W	RPS24A	TFIID	34.4241	689	-0.250364	-0.080927	-0.0362285	-1.14137	-1.48366	-1.08374	-2.72972	-1.71159	-1.67773	-1.06468
YKR081C	RPF2	TFIID	34.3808	690	-0.205561	0.241544	0.227935	-0.739759	-1.50834	-1.13697	-2.76886	-2.44191	-2.36153	-2.15403
YGR106C	VOA1	TFIID	34.3427	691	-0.100399	-0.055506	-0.0778924	-1.31353	-1.37629	-0.697046	-2.31131	-1.93082	-1.33396	-1.57757
YGL245W	GUS1	TFIID	34.3341	692	-0.106264	0.175527	-0.047815	-1.70607	-1.26974	-0.817435	-2.10244	-1.42054	-1.53007	-1.27769
YGR161C	RTS3	CR	34.3305	693	-0.0587143	-0.895181	-0.274936	-2.11354	-0.986183	-1.113	-0.612831	-0.0875179	-0.471967	-0.922935
YDL125C	HNT1	CR	34.3076	694	0.0258972	-0.508046	-0.317784	-1.89769	-2.03705	-1.53121	-1.01944	-0.745965	-0.451098	-1.4271
YDL122W	UBP1	TFIID	34.1768	695	0.0661348	0.0903483	-0.101345	-1.52172	-1.53987	-1.05376	-2.16644	-1.67583	-1.92863	-1.74904
YJL136C	RPS21B	TFIID	34.1652	696	-0.0629928	-0.187213	-0.224729	-1.15977	-1.44004	-0.988395	-2.70235	-1.60238	-1.55941	-0.935778
YKR011C	YKR011C	TFIID	34.1651	697	-0.0446626	-0.427607	-0.286583	-2.39798	-1.06086	-0.296342	-1.48232	-1.57384	-1.65685	-1.69896
YDL053C	PBP4	TFIID	34.0768	698	0.0489369	0.349908	0.172038	-1.43215	-0.980003	-0.581449	-2.25204	-1.63394	-1.73276	-1.88804
YCL054W	SPB1	TFIID	34.0615	699	-0.228463	0.187716	0.444761	-1.06464	-1.27811	-0.71377	-2.34761	-2.08977	-2.26245	-1.91836
YCL011C	GBP2	TFIID	34.0424	700	0.0317794	0.0823625	0.0269079	-1.62193	-1.1589	-0.675295	-2.24569	-1.8755	-1.81319	-1.9261
YDR127W	ARO1	CR	34.0386	701	0.000627064	0.303468	0.150324	-1.01006	-1.25992	-0.982226	-1.58076	-0.898341	-0.845354	-0.964777
YIL149C	MLP2	TFIID	34.0225	702	-0.0854756	0.108063	0.151811	-1.91978	-1.10776	-0.475265	-2.07381	-1.72492	-1.94898	-1.83179
YFR002W	NIC96	TFIID	34.0142	703	-0.0165588	0.208694	0.132422	-1.56368	-0.918092	-0.563407	-1.72898	-1.84537	-1.84016	-1.69048
YJL133C-A	YJL133C-A	CR	33.9902	704	-0.0531981	-1.41072	-1.70368	-3.10855	-1.95926	-2.11874	0.261633	0.806485	1.74691	0.191123
YPL012W	RRP12	TFIID	33.9872	705	-0.0834491	0.268226	0.177195	-0.85041	-1.43957	-1.04933	-2.51715	-2.53901	-2.44805	-1.94393
YGR146C	ECL1	CR	33.9856	706	-0.172008	-0.426029	-0.6807	-0.608696	-1.13732	-1.07712	-0.200153	-0.078097	-0.298271	-0.598625
YPL215W	CBP3	TFIID	33.9138	707	0.0180395	0.0892593	-0.0138758	-1.72312	-1.08956	-0.695247	-1.71298	-1.68182	-1.79452	-1.57233
YML009C	MRPL39	TFIID	33.8453	708	-0.23893	0.0592723	-0.0704233	-1.7595	-0.821825	-0.718194	-3.00362	-1.58806	-2.01336	-2.32242
YGR128C	UTP8	TFIID	33.845	709	-0.139071	0.236568	0.180665	-1.07156	-1.50831	-1.14381	-2.43978	-2.31316	-2.22694	-1.92249
YOL068C	HST1	TFIID	33.836	710	0.0958237	0.0466271	-0.0149743	-1.68634	-1.19743	-0.665475	-1.85161	-1.75263	-1.79256	-1.9285
YPR016C	TIF6	TFIID	33.8005	711	-0.189154	0.0590032	-0.153632	-0.936372	-1.41135	-0.925536	-2.58546	-2.51266	-2.12364	-2.14835
YGR231C	PHB2	TFIID	33.7827	712	-0.05773	-0.0413701	-0.195315	-1.77928	-1.45898	-0.932855	-2.17144	-1.69904	-1.85333	-1.97695
YER123W	YCK3	TFIID	33.7598	713	-0.0269246	0.308255	0.337641	-1.35222	-0.887983	-0.3361	-1.30177	-1.46621	-1.67093	-1.40669
YDR226W	ADK1	CR	33.7565	714	-0.176792	-0.5983	-0.758596	-2.17985	-2.50682	-1.77513	-1.86778	-1.10318	-1.20453	-1.16025
YPR010C	RPA135	TFIID	33.7316	715	-0.0560571	0.169192	-0.0194083	-0.796997	-1.52292	-1.16292	-2.84219	-2.51393	-2.51592	-2.08503
YGR130C	YGR130C	TFIID	33.7308	716	-0.0583933	-0.118643	-0.195975	-2.8589	-1.25383	-0.682217	-1.93645	-1.45939	-2.08343	-1.99029
YEL051W	VMA8	TFIID	33.73	717	-0.267733	0.0428528	-0.0320316	-1.70525	-1.42439	-0.625955	-2.48242	-1.80138	-1.77479	-1.51094
YCR004C	YCP4	TFIID	33.6739	718	0.164589	-0.284298	-0.276985	-1.0921	-0.371148	-0.179374	-1.52469	-1.14027	-0.752186	-1.46067
YMR295C	YMR295C	TFIID	33.6104	719	-0.157205	-0.169979	-0.323497	-1.89112	-1.71076	-0.986999	-2.45101	-2.13435	-2.59299	-2.02192
YNL044W	YIP3	TFIID	33.6099	720	-0.120797	-0.367003	-0.0947915	-2.44839	-1.97405	-1.13921	-2.27963	-2.07123	-1.8232	-2.10136
YML093W	UTP14	TFIID	33.5975	721	-0.170031	0.265056	0.26428	-1.21581	-1.54853	-0.8171	-2.41621	-2.22171	-2.32101	-1.9333
YDR152W	GIR2	TFIID	33.595	722	-0.199703	0.0189847	0.146718	-1.03567	-1.37771	-0.879432	-2.16536	-1.77751	-2.00436	-1.80712
YDR153C	ENT5	TFIID	33.5836	723	-0.0545513	0.121362	0.281448	-1.39189	-1.2545	-0.750661	-2.54041	-2.17598	-2.24772	-2.39874
YLR297W	YLR297W	CR	33.5452	724	0.247509	-2.84537	-2.52943	-3.49578	-4.62105	-4.50771	-0.627245	-0.397776	-0.0852887	-0.658823
YPL146C	NOP53	TFIID	33.5376	725	-0.230036	0.167498	0.272834	-1.22269	-1.34805	-0.741452	-2.52167	-2.35833	-2.24439	-2.31098
YNL005C	MRP7	TFIID	33.4752	726	-0.0374071	0.27717	0.132116	-1.22883	-1.06629	-0.617898	-2.29045	-2.03408	-1.65558	-2.03114
YPL105C	SYH1	TFIID	33.4724	727	-0.0228541	0.103996	0.118143	-1.67203	-1.24045	-0.693581	-1.81701	-1.7485	-1.88842	-1.89085
YNR021W	YNR021W	TFIID	33.4163	728	-0.265784	0.0544549	0.10571	-1.68871	-1.10765	-0.679642	-2.03209	-1.84637	-1.83861	-1.81347
YPL019C	VTC3	CR	33.4012	729	-0.339675	-0.0933436	-0.12142	-4.95372	-4.10387	-3.39686	-1.32969	-1.26767	-1.3301	-1.18127
YJR014W	TMA22	TFIID	33.3935	730	-0.175266	-0.160784	-0.198616	-1.41877	-1.65005	-1.10584	-2.7855	-2.09912	-2.37062	-2.02809
YHR005C	GPA1	TFIID	33.3931	731	-0.0971158	-0.146397	-0.0431578	-1.04464	-1.94779	-1.44706	-2.35703	-1.30177	-1.50936	-1.57818
YBR162W-A	YSY6	TFIID	33.3359	732	-0.177868	0.0124224	-0.300772	-1.61043	-1.54066	-1.00195	-2.77051	-1.62299	-1.14407	-1.2403
YML056C	IMD4	TFIID	33.3303	733	-0.0634306	-0.463489	-0.699219	-0.845694	-1.53806	-0.912247	-2.31577	-1.05795	-1.18148	-1.13911
YKL145W	RPT1	TFIID	33.3086	734	-0.0212282	-0.202574	-0.200235	-1.73619	-1.49587	-0.995202	-2.22234	-1.84166	-2.01056	-1.82505
YHR203C	RPS4B	TFIID	33.3025	735	-0.159538	-0.0790045	-0.183026	-1.16808	-1.41767	-1.12303	-2.63781	-2.02475	-1.87396	-1.36378
YGL244W	RTF1	TFIID	33.2918	736	2.00353e-05	0.248388	0.196565	-1.67906	-0.809574	-0.169136	-2.20231	-1.62032	-1.86151	-1.98075
YDL116W	NUP84	TFIID	33.2713	737	0.0195495	0.143331	0.134844	-1.73538	-1.16435	-0.674622	-1.80191	-1.76391	-1.78036	-1.62617
YDL143W	CCT4	TFIID	33.2614	738	-0.0600003	0.18124	-0.165798	-1.55867	-1.43607	-0.963037	-2.02713	-1.81555	-1.96758	-1.74125
YMR203W	TOM40	TFIID	33.2573	739	-0.192166	0.0674401	-0.128805	-1.87992	-1.34944	-0.740555	-2.21182	-1.86394	-1.89619	-1.77278
YLR310C	CDC25	TFIID	33.2544	740	-0.0428913	-0.0561915	-0.0863092	-1.55306	-1.16318	-0.698372	-2.19472	-1.81785	-1.93843	-1.76457
YOR008C	SLG1	TFIID	33.2536	741	-0.00234286	-0.426271	-0.558611	-2.12331	-1.97717	-1.6682	-2.83632	-2.36711	-2.37208	-2.12552
YKL120W	OAC1	CR	33.224	742	-0.246976	-0.241121	-0.304221	0.0449595	-0.768391	-0.596421	-0.952452	-0.635139	-0.829729	-1.19168
YDR335W	MSN5	TFIID	33.1971	743	-0.0388014	-0.104293	-0.161663	-1.5284	-1.06488	-0.721341	-2.15342	-2.16497	-2.06067	-1.91442
YHR077C	NMD2	TFIID	33.1966	744	-0.0469026	0.0823618	0.157941	-1.46168	-0.993217	-0.551948	-1.73005	-1.746	-1.93927	-1.59013
YGR267C	FOL2	TFIID	33.1949	745	-0.144612	0.00487467	-0.0583196	-0.700547	-1.04365	-0.707286	-2.13183	-1.84414	-1.92518	-1.75739
YEL033W	MTC7	CR	33.1891	746	-0.141985	-0.502904	-0.139192	-1.89066	-1.38545	-0.644942	-0.989225	-0.879846	0.128012	-1.61877
YPR067W	ISA2	TFIID	33.1595	747	-0.116786	-0.0408568	-0.334436	-1.41214	-1.0882	-0.748363	-2.3939	-2.36107	-2.20463	-2.41925
YBR086C	IST2	TFIID	33.1398	748	0.0961092	-0.288391	-0.460258	-2.44489	-1.56362	-0.972068	-2.26375	-2.46689	-2.29862	-2.01396
YGR175C	ERG1	CR	33.1365	749	-0.233752	-0.606262	-0.673079	-1.93723	-1.52258	-1.01863	-1.9972	-1.26481	-1.20276	-1.41472
YGL043W	DST1	TFIID	33.1121	750	-0.193869	0.129077	0.059499	-1.54517	-1.26211	-0.996471	-2.14968	-1.83705	-2.15687	-1.66115
YGL078C	DBP3	TFIID	33.0759	751	-0.193475	0.187544	-0.0830916	-0.837937	-1.60909	-1.11124	-3.09755	-2.65794	-2.48018	-2.14698
YJL168C	SET2	TFIID	33.0742	752	-0.0815254	-0.0122361	0.106133	-2.35419	-1.37516	-0.874034	-2.35725	-1.92976	-2.0025	-2.05238
YMR037C	MSN2	CR	33.0126	753	-0.0172996	-0.259998	-0.241334	-1.7704	-1.49109	-1.07439	-1.73765	-0.617798	-0.743891	-0.824085
YLR221C	RSA3	TFIID	33.0035	754	-0.177671	0.151694	0.235291	-1.24399	-1.19932	-0.799576	-2.68171	-2.10502	-2.41287	-2.26873
YML038C	YMD8	TFIID	32.9821	755	-0.195779	-0.224808	0.0108948	-1.20101	-1.14189	-0.593934	-1.90403	-2.09391	-1.89889	-1.8721
YOR224C	RPB8	TFIID	32.967	756	-0.274965	0.318566	0.076881	-0.901288	-0.907133	-0.588064	-2.71073	-2.0058	-1.63171	-1.88546
YNL091W	NST1	TFIID	32.9622	757	0.0172049	0.128275	0.235851	-1.84782	-0.98335	-0.295219	-1.85121	-1.92497	-2.11084	-1.77816
YGR167W	CLC1	TFIID	32.96	758	-0.0982802	0.0928804	0.0342098	-1.97355	-1.21937	-0.571029	-2.19467	-1.40478	-1.77682	-1.98186
YGL188C-A	YGL188C-A	TFIID	32.9193	759	-0.306553	-0.0779766	-0.244601	-0.252758	-0.60038	-0.692283	-1.81945	-1.897	-2.10016	-2.22816
YFR050C	PRE4	TFIID	32.9117	760	-0.0992872	-0.0164363	-0.345271	-1.53362	-1.52847	-1.10368	-1.92897	-1.81703	-1.57894	-1.94149
YKL104C	GFA1	TFIID	32.8834	761	0.00577602	-0.00179252	-0.209806	-1.24835	-1.25603	-0.838371	-2.26421	-1.73306	-1.74052	-1.69451
YDR062W	LCB2	TFIID	32.8682	762	0.0334323	-0.0317525	-0.153336	-1.69625	-1.31339	-0.90601	-2.74758	-2.2883	-2.26176	-2.2888
YOR247W	SRL1	CR	32.8451	763	-0.126894	-0.569298	-0.644088	-1.79369	-1.71364	-0.664667	-0.133999	0.0541844	-0.0752369	-0.25675
YML081C-A	ATP18	TFIID	32.8032	764	-0.167196	0.162343	-0.152174	-1.60361	-0.976179	-0.632895	-2.32121	-2.00456	-1.38784	-1.16913
YCR033W	SNT1	TFIID	32.8005	765	0.0141006	-0.0294925	-0.000837567	-2.05951	-1.33933	-0.855969	-2.06151	-1.64939	-2.11444	-1.67478
YJL012C	VTC4	CR	32.7897	766	-0.186957	0.110848	0.00313377	-3.46873	-2.65353	-2.19644	-1.6946	-1.394	-1.53638	-1.34831
YKL080W	VMA5	TFIID	32.7852	767	-0.190038	0.11064	-0.0586772	-1.76349	-1.07811	-0.77202	-2.04525	-1.78947	-1.77209	-1.71092
YOR326W	MYO2	TFIID	32.7718	768	-0.0869269	0.000578731	-0.114254	-1.85702	-1.36569	-0.70143	-2.2429	-2.02339	-2.15297	-1.78401
YCR082W	AHC2	TFIID	32.7529	769	-0.0264437	0.209596	-0.0747403	-1.18801	-0.945993	-0.633486	-1.78735	-2.13645	-1.35857	-1.9617
YLR432W	IMD3	CR	32.7358	770	-0.132332	-0.319346	-0.670663	-1.44017	-1.9007	-1.27915	-2.28951	-1.09102	-1.03185	-1.02743
YMR173W	DDR48	CR	32.7065	771	0.0380454	-1.99622	-1.91379	-3.87633	-4.83107	-4.12401	-0.304942	-0.0911134	-0.31839	-0.83058
YBR029C	CDS1	TFIID	32.6938	772	-0.138619	-0.374949	-0.132201	-3.0106	-2.13143	-1.51211	-2.63826	-2.39151	-2.29142	-2.50469
YPL090C	RPS6A	TFIID	32.6934	773	-0.219946	-0.253495	-0.275998	-1.27528	-1.68987	-1.26019	-2.42519	-1.97467	-1.64397	-1.40453
YBR199W	KTR4	TFIID	32.673	774	-0.13298	-0.0409204	-0.148615	-1.91418	-0.847494	-0.386283	-1.91366	-1.46308	-1.32409	-1.51846
YER006W	NUG1	TFIID	32.6234	775	-0.167696	0.274594	0.0606701	-0.72763	-1.50588	-0.973346	-2.64197	-2.24708	-2.24242	-1.96757
YDL067C	COX9	TFIID	32.6183	776	-0.101966	0.312598	-0.0784293	-0.113614	-0.583721	-0.312832	-2.30876	-1.19546	-0.60294	-1.49251
YDR280W	RRP45	TFIID	32.6091	777	0.0393669	0.0978555	0.251258	-1.26449	-1.36283	-0.926593	-2.27563	-2.06777	-1.94452	-2.05909
YHR190W	ERG9	CR	32.563	778	-0.105638	-0.231625	-0.234392	-1.95752	-0.792881	-0.571685	-1.26605	-1.10678	-1.10072	-1.31277
YBL030C	PET9	CR	32.5494	779	0.0549471	0.0566153	-0.445696	-1.05127	-0.793709	-0.479086	-1.1425	-0.280325	-0.0651624	-0.76888
YOR209C	NPT1	TFIID	32.5467	780	-0.0471982	-0.0540588	-0.0586692	-1.43841	-1.40793	-1.02047	-1.87913	-1.76539	-1.56312	-1.3258
YMR015C	ERG5	CR	32.5082	781	-0.0735184	-1.33506	-1.41762	-1.82284	-1.9641	-1.61305	-1.17443	-0.944414	-0.872232	-1.21285
YLL029W	FRA1	TFIID	32.4797	782	-0.186326	0.0632192	-0.102872	-1.49799	-1.4445	-0.988827	-2.43173	-2.3244	-2.21525	-2.22466
YPR137W	RRP9	TFIID	32.4567	783	-0.145482	0.197764	0.292441	-0.947447	-1.39924	-0.950305	-2.15984	-1.84675	-2.02773	-1.97059
YGL228W	SHE10	TFIID	32.4333	784	-0.0861601	0.084444	-0.0983787	-1.85673	-1.09845	-0.560824	-2.15988	-1.87105	-2.0375	-1.76331
YDR293C	SSD1	TFIID	32.4109	785	-0.0234731	0.13254	-0.140948	-2.13064	-1.24331	-0.730978	-1.69698	-1.70379	-1.77915	-1.56201
YGL048C	RPT6	TFIID	32.4032	786	-0.00505926	-0.0743647	-0.391644	-1.73111	-1.5535	-0.863996	-2.10285	-1.80825	-1.67658	-1.91895
YLR262C-A	TMA7	TFIID	32.373	787	-0.309279	0.0543858	0.094541	-1.36352	-1.41916	-0.578146	-2.67879	-2.01864	-1.79966	-1.28568
YEL031W	SPF1	TFIID	32.3245	788	-0.0131027	-0.0283056	-0.202628	-1.54007	-0.989487	-0.559225	-1.96076	-1.81291	-1.75127	-1.51976
YNL098C	RAS2	TFIID	32.3219	789	0.0307269	-0.0626006	-0.294274	-2.05701	-1.60401	-1.25049	-1.5735	-1.59627	-1.74527	-1.77505
YGR204W	ADE3	CR	32.3109	790	-0.0251274	-0.23923	-0.475915	-1.26533	-1.45166	-1.16448	-1.27726	-1.01441	-1.12481	-1.27916
YEL013W	VAC8	TFIID	32.3091	791	-0.0518583	0.123365	-0.00749489	-1.55066	-0.950728	-0.665837	-1.77606	-1.72569	-1.82215	-1.45325
YER030W	CHZ1	TFIID	32.2279	792	-0.0246956	0.206159	0.25386	-1.51061	-0.790628	0.026411	-2.9404	-1.71114	-1.68422	-1.53152
YFL005W	SEC4	TFIID	32.1757	793	-0.0786353	-0.00330616	-0.115437	-1.28323	-0.838162	-0.503956	-2.8391	-1.83161	-2.09772	-1.78532
YOL029C	YOL029C	TFIID	32.1537	794	0.215008	-0.253691	-0.0629607	-1.46706	-1.31167	-0.982095	-1.62511	-1.61422	-1.59528	-1.92608
YNL157W	IGO1	TFIID	32.1276	795	-0.0406635	-0.0434124	0.23855	-1.74798	-1.04039	-0.690089	-1.69956	-1.62834	-1.86295	-1.87272
YCL064C	CHA1	CR	32.1174	796	-0.105008	-1.99233	-1.04587	-1.9236	-3.53713	-3.19744	-0.872456	-0.0525542	-0.21975	-0.581193
YMR125W	STO1	TFIID	32.0785	797	-0.076394	0.125135	0.0248763	-1.74712	-1.20425	-0.675234	-3.66117	-2.65017	-2.4577	-2.40775
YJL061W	NUP82	TFIID	32.0421	798	-0.0584352	0.158839	0.153772	-1.64739	-0.995329	-0.582794	-2.06888	-1.83392	-1.8434	-1.7224
YOR046C	DBP5	TFIID	32.0207	799	-0.104689	0.082439	0.0360398	-1.40339	-1.06187	-0.468263	-2.61068	-2.09172	-2.16884	-1.80896
YJL138C	TIF2	CR	31.9919	800	-0.198192	-0.0496794	-0.0856516	-1.15211	-1.27495	-0.928535	-1.21896	-1.34168	-1.36281	-0.902355
YFR031C-A	RPL2A	TFIID	31.9762	801	-0.112406	-0.0132037	-0.319995	-1.16478	-1.7954	-1.35218	-3.16383	-1.81798	-1.68078	-1.3581
YJR139C	HOM6	TFIID	31.9757	802	-0.110754	-0.24273	-0.231498	-0.911004	-0.962784	-0.580325	-1.93056	-1.48242	-1.53014	-1.45161
YOL004W	SIN3	TFIID	31.9597	803	-0.023996	0.0457436	-0.136505	-1.77534	-1.11055	-0.578844	-2.24592	-2.05732	-2.02587	-1.87005
YPR033C	HTS1	TFIID	31.9285	804	-0.2109	0.26619	0.134155	-0.734939	-0.684656	-0.439568	-2.73426	-1.82137	-1.75596	-1.77945
YJL140W	RPB4	TFIID	31.8786	805	-0.0571654	0.299604	0.258363	-1.34325	-1.10272	-0.53556	-1.80307	-1.61305	-1.64298	-1.67059
YER112W	LSM4	TFIID	31.842	806	-0.166116	0.1752	0.278623	-1.60295	-0.817072	-0.50832	-1.76917	-1.60702	-1.78347	-1.86116
YGL114W	YGL114W	CR	31.8378	807	0.238674	-0.702817	-0.550806	-1.42612	-1.92676	-1.56651	-0.818206	-0.61456	-0.464409	-0.873544
YOR051C	ETT1	TFIID	31.82	808	-0.222213	-0.00709988	0.0920929	-1.55667	-1.67808	-1.12277	-3.06197	-1.85587	-1.69648	-1.90914
YML129C	COX14	TFIID	31.8037	809	-0.126471	0.22046	-0.21404	-1.64797	-1.2982	-0.861939	-1.74405	-1.41849	-1.55518	-2.23471
YDR211W	GCD6	TFIID	31.7969	810	-0.177725	0.250738	0.142364	-1.06842	-1.16574	-0.665655	-2.25491	-1.98901	-2.03018	-1.95988
YKL181W	PRS1	TFIID	31.7727	811	-0.20572	0.256186	-0.0560089	-0.909629	-1.43532	-1.0284	-2.34824	-2.0727	-2.18775	-1.81718
YDL191W	RPL35A	TFIID	31.7623	812	-0.174457	-0.249384	-0.176408	-1.03566	-1.52117	-1.18915	-2.09417	-1.56857	-1.49612	-1.21957
YDR483W	KRE2	TFIID	31.7223	813	-0.0278029	-0.0898902	-0.359626	-1.74469	-1.8241	-1.36673	-2.57591	-2.05685	-1.98774	-1.86874
YJL167W	ERG20	CR	31.7201	814	-0.197371	-0.122716	-0.200653	-2.03604	-1.18173	-0.675804	-1.65287	-1.32043	-1.36821	-1.02188
YCR020W-B	HTL1	TFIID	31.7091	815	-0.203623	0.076096	0.647829	-0.882759	-1.18727	-0.611385	-2.26508	-2.65593	-1.95122	-1.79779
YBR279W	PAF1	TFIID	31.6984	816	-0.0254551	0.11938	0.162262	-1.92434	-1.24865	-0.785008	-2.38285	-1.78494	-2.03583	-1.92064
YJL174W	KRE9	TFIID	31.6716	817	-0.122869	-0.0454643	-0.160706	-1.49619	-1.35082	-0.790933	-2.10922	-1.88107	-1.67859	-2.09061
YJR145C	RPS4A	TFIID	31.6376	818	-0.174372	-0.0727852	-0.242199	-1.1156	-1.54246	-0.997875	-2.8539	-1.84479	-1.8137	-1.49186
YOR260W	GCD1	TFIID	31.5731	819	-0.0257577	0.198881	0.216372	-1.32574	-1.26197	-0.960501	-1.48761	-1.42688	-1.58459	-1.70062
YOR317W	FAA1	TFIID	31.5597	820	-0.229844	-0.556823	-0.615624	-2.968	-1.29445	-1.02825	-2.16815	-1.27312	-1.4963	-1.70434
YNL037C	IDH1	CR	31.5338	821	-0.102625	-1.54294	-2.17553	-2.41286	-4.62384	-4.01944	0.146091	-0.12404	0.370241	-0.540168
YER049W	TPA1	TFIID	31.5045	822	-0.104851	-0.257525	-0.127124	-0.986174	-1.56158	-1.18547	-2.26333	-2.07887	-1.87041	-1.68642
YBR031W	RPL4A	TFIID	31.4313	823	-0.140472	-0.096546	-0.179745	-0.93763	-1.49066	-1.08902	-1.82274	-1.32912	-1.42043	-1.18049
YKL016C	ATP7	TFIID	31.4192	824	-0.252312	0.0897669	-0.15455	-1.05543	-0.585815	-0.209345	-2.12036	-1.42522	-1.52791	-1.50542
YOR184W	SER1	CR	31.3767	825	-0.168059	-0.471532	-0.590261	-0.620199	-1.17938	-0.853232	-1.20159	-0.713653	-0.550957	-0.964222
YER141W	COX15	TFIID	31.3668	826	-0.0974136	-0.137999	-0.419486	-1.48902	-0.872041	-0.508403	-2.20776	-2.12524	-1.60022	-1.78162
YLR106C	MDN1	TFIID	31.3266	827	-0.0156476	0.123888	0.0866916	-1.31756	-1.21759	-0.71318	-1.96883	-1.8892	-1.95138	-1.58306
YER155C	BEM2	TFIID	31.2933	828	-0.0832001	-0.0186068	-0.261187	-1.44434	-1.27291	-0.724661	-2.45468	-2.00318	-2.17639	-1.84115
YGR065C	VHT1	CR	31.2838	829	-0.399238	-1.38227	-0.117609	-0.151326	-1.77357	-1.91489	-1.18654	-1.3519	-0.732822	-1.21178
YDR309C	GIC2	CR	31.2779	830	-0.147035	-0.152061	-0.184645	-1.44759	-1.34014	-0.638305	-1.13266	-0.592705	-0.74539	-1.04139
YER110C	KAP123	TFIID	31.2684	831	-0.177878	0.152388	0.0136903	-1.21557	-1.50731	-0.914059	-2.51173	-1.9062	-1.92246	-1.60848
YHR019C	DED81	TFIID	31.2683	832	0.0876331	0.093327	-0.151799	-0.890118	-1.49896	-1.10867	-2.42769	-1.91423	-1.8424	-1.57065
YDR372C	VPS74	TFIID	31.2129	833	-0.0672986	0.21621	0.193489	-1.60013	-1.143	-0.670243	-1.72338	-1.68416	-1.57009	-1.61927
YBR071W	YBR071W	CR	31.1637	834	-0.126925	-0.900931	-0.735562	-3.42731	-2.81892	-2.26023	-0.519011	-0.419251	-0.603738	-0.847179
YDR308C	SRB7	TFIID	31.1422	835	-0.0788783	0.193866	0.229922	-1.19683	-0.656452	-0.338985	-2.18437	-2.10462	-2.22058	-1.67472
YKL160W	ELF1	TFIID	31.1325	836	-0.0384449	0.213182	-0.104855	-1.46599	-1.17205	-0.657823	-2.37896	-1.36063	-1.62187	-1.29347
YDL132W	CDC53	TFIID	31.0903	837	0.0323112	0.0842375	0.165991	-1.71927	-1.02593	-0.41779	-1.51401	-1.27041	-1.66816	-1.52555
YPR062W	FCY1	TFIID	31.073	838	-0.22283	0.303984	-0.0339573	-1.36271	-1.31322	-1.13187	-2.87048	-1.71819	-1.52038	-1.64901
YOR123C	LEO1	TFIID	31.0304	839	-0.0733099	0.151354	0.181399	-1.58325	-1.31933	-0.597782	-2.17609	-1.84	-1.99607	-2.00896
YDL066W	IDP1	CR	30.9888	840	-0.232246	0.0695183	0.048147	0.010147	-0.321581	-0.0595158	-0.717129	-0.351143	-0.454544	-0.717961
YBL004W	UTP20	TFIID	30.9525	841	-0.0748912	0.15309	0.0796984	-1.29712	-1.44938	-0.941238	-2.39412	-2.25405	-2.14047	-1.78749
YCR028C-A	RIM1	TFIID	30.8882	842	-0.00659142	0.100619	0.00970257	-1.27334	-1.04119	-0.691856	-2.70083	-1.91334	-2.1167	-1.95925
YNL137C	NAM9	TFIID	30.8715	843	-0.0102854	0.203741	0.084193	-1.60019	-1.29115	-0.767596	-1.88822	-1.91036	-1.76497	-1.7289
YPL158C	AIM44	CR	30.8694	844	-0.105203	-0.975736	-0.428797	-2.30942	-2.50651	-2.16118	-0.41593	-0.163959	-0.488409	-0.617456
YLR244C	MAP1	TFIID	30.8671	845	-0.203811	-0.138264	-0.217321	-1.71964	-2.16725	-1.51988	-1.80464	-1.91638	-1.83234	-1.44436
YPR028W	YOP1	CR	30.8251	846	-0.01958	-0.432539	-0.745742	-2.31673	-1.81419	-0.999858	-1.73454	-1.71821	-1.42458	-1.16268
YNL084C	END3	TFIID	30.8235	847	-0.151544	0.00971098	0.0375308	-1.96977	-1.03639	-0.584441	-2.16645	-1.72404	-1.8317	-1.70278
YGR270W	YTA7	TFIID	30.8115	848	-0.0376405	0.0117134	0.0128967	-1.97147	-1.01122	-0.465089	-2.1724	-1.96865	-2.14252	-1.93419
YOL081W	IRA2	TFIID	30.809	849	-0.0494571	-0.0233211	-0.184052	-1.80281	-1.17834	-0.63914	-2.35399	-2.06745	-2.03908	-1.93052
YDR074W	TPS2	CR	30.7883	850	0.10547	-0.464304	-0.957041	-3.73918	-1.66144	-1.19163	-1.41972	-0.669571	-0.8248	-1.40189
YBL051C	PIN4	TFIID	30.7551	851	-0.0880403	0.166086	0.0588136	-1.95817	-1.36415	-0.716703	-1.70888	-1.52123	-1.52049	-1.56638
YGL137W	SEC27	TFIID	30.7213	852	-0.0827772	0.100886	-0.0794321	-1.76564	-1.21246	-0.686921	-2.16429	-1.84525	-1.82712	-1.62478
YBL047C	EDE1	TFIID	30.7027	853	-0.0204826	-0.0537979	-0.173422	-2.36023	-1.26958	-0.784944	-1.95704	-1.59234	-2.03356	-1.67431
YLR196W	PWP1	TFIID	30.7023	854	-0.0731972	0.142795	0.175444	-0.563382	-1.52094	-0.863079	-2.42105	-2.03774	-2.04579	-1.8206
YDL195W	SEC31	TFIID	30.6909	855	0.0442053	-0.0335378	-0.186522	-1.99116	-1.34523	-0.764626	-2.15388	-1.83094	-1.74141	-1.634
YGL252C	RTG2	TFIID	30.6842	856	0.0780172	-0.145836	-0.141982	-1.51625	-0.97309	-0.587536	-2.02933	-2.1102	-1.97018	-2.0101
YKR066C	CCP1	CR	30.677	857	0.950597	0.29191	-0.825697	-1.30915	-1.71794	-1.41417	0.102262	-0.117172	0.170522	-0.529789
YHR208W	BAT1	TFIID	30.6547	858	-0.285641	0.49545	0.0307034	0.088824	0.000398297	0.160156	-1.16265	-0.875532	-0.88109	-0.863273
YNL307C	MCK1	TFIID	30.6528	859	-0.146696	-0.0204114	-0.131687	-1.92567	-0.928029	-0.623712	-1.99935	-1.88897	-1.7374	-1.74834
YIR017C	MET28	CR	30.6498	860	-0.13993	-0.12125	0.142543	-0.633529	-1.17936	-1.19812	0.351588	-0.260834	-0.209557	-0.946776
YPL126W	NAN1	TFIID	30.6393	861	-0.122129	0.157638	0.0719946	-0.942254	-1.60043	-1.17173	-2.46428	-2.40519	-2.33868	-2.007
YDR529C	QCR7	TFIID	30.6305	862	-0.0507015	0.5186	-0.114741	-0.990875	-0.732283	-0.168709	-1.92878	-1.15839	-0.998635	-1.28274
YDL134C	PPH21	TFIID	30.6293	863	0.0588765	0.139759	-0.00143086	-1.68935	-1.30413	-0.724624	-1.83728	-1.80005	-1.61567	-1.95676
YLR025W	SNF7	TFIID	30.6258	864	-0.125257	0.218816	0.224757	-1.65141	-0.931769	-0.463581	-2.0737	-2.01597	-1.87239	-2.12217
YDL136W	RPL35B	TFIID	30.5427	865	-0.0579643	-0.193203	-0.401928	-1.39685	-1.67677	-1.23486	-2.38719	-1.84939	-1.561	-1.26332
YDR168W	CDC37	TFIID	30.5044	866	-0.0138522	0.13921	-0.0121357	-1.49164	-0.988531	-0.542419	-2.30209	-1.94537	-2.05865	-2.03755
YJR076C	CDC11	TFIID	30.4478	867	-0.0586608	-0.109542	-0.0259682	-2.08436	-1.56218	-0.905858	-2.4418	-1.96185	-2.02674	-2.16438
YDR025W	RPS11A	TFIID	30.4343	868	-0.0476257	0.00416632	-0.25934	-1.12507	-1.56945	-1.11984	-2.56217	-1.76742	-1.76651	-1.39483
YOR194C	TOA1	TFIID	30.4225	869	-0.0861349	0.0194766	0.237974	-1.74992	-1.33411	-0.480354	-2.20686	-1.44372	-1.92102	-2.04548
YMR311C	GLC8	TFIID	30.4142	870	-0.0633481	0.0738575	0.211859	-1.63495	-1.12329	-0.463105	-2.08947	-1.48866	-1.66924	-1.92442
YGR187C	HGH1	TFIID	30.4047	871	-0.134824	0.145496	0.401533	-0.97637	-1.48004	-0.962331	-3.33626	-3.00194	-2.78075	-2.54151
YOR014W	RTS1	TFIID	30.393	872	-0.0672132	-0.00581827	-0.0615068	-1.93721	-1.19516	-0.619279	-1.86792	-1.69408	-1.90177	-1.68582
YHR089C	GAR1	TFIID	30.3667	873	-0.135364	0.0812144	-0.383999	-1.02575	-1.63541	-1.21181	-2.95048	-2.20002	-1.65294	-1.91014
YLR406C	RPL31B	TFIID	30.3369	874	-0.105137	-0.128721	-0.407311	-1.11777	-1.80497	-1.47526	-3.40203	-2.29886	-2.00601	-1.88068
YPL235W	RVB2	TFIID	30.3304	875	-0.0855719	0.121491	0.0291858	-1.55264	-1.45968	-0.890774	-2.20825	-1.83166	-1.92739	-1.89651
YLR399C	BDF1	CR	30.3285	876	-0.110688	-0.915999	-0.913666	-3.2821	-2.22039	-1.76918	-0.203335	0.176541	-0.0651722	-0.280157
YPL169C	MEX67	TFIID	30.3192	877	0.0205811	0.0694961	0.0685699	-1.81467	-1.24941	-0.80437	-1.9102	-2.00927	-2.0872	-1.95723
YBR221C	PDB1	TFIID	30.2547	878	-0.0113884	-0.0506807	-0.22283	-1.39027	-1.24583	-0.882335	-2.40377	-1.90348	-1.75843	-1.64238
YMR195W	ICY1	CR	30.2398	879	-0.153574	-0.604632	-0.647903	-2.3178	-1.38532	-1.48788	0.0225383	0.515006	0.652449	-0.739502
YMR266W	RSN1	CR	30.1951	880	-0.0411919	-1.16989	-1.06004	-2.37375	-3.08956	-2.73387	-1.03148	-0.964449	-0.783554	-1.15857
YFR001W	LOC1	TFIID	30.1793	881	-0.176301	0.185781	0.234204	-1.15159	-1.18482	-0.779685	-2.67619	-2.38241	-2.28467	-2.17807
YBL079W	NUP170	TFIID	30.173	882	-0.000983145	0.0664415	-0.0607209	-1.73673	-1.31857	-0.797827	-2.09888	-2.00896	-2.03432	-1.83921
YDL031W	DBP10	TFIID	30.1301	883	-0.148813	0.353012	0.267286	-1.1683	-1.11126	-0.487081	-2.41836	-2.12798	-2.39547	-1.70994
YLR387C	REH1	TFIID	30.1013	884	0.222186	-0.0583326	-0.217018	-1.25883	-1.26664	-0.616541	-1.65789	-1.78541	-2.13505	-1.88807
YFR030W	MET10	TFIID	30.089	885	-0.121507	0.082976	-0.343943	0.954215	0.00813978	0.161697	-0.479407	-1.23674	-1.08107	-1.23424
YBR191W	RPL21A	TFIID	30.0825	886	-0.163516	-0.18118	-0.230787	-1.25148	-1.81883	-1.31509	-2.64597	-1.76844	-1.70852	-1.39609
YLR449W	FPR4	TFIID	30.0658	887	-0.167089	0.222801	0.230161	-1.44898	-1.62818	-0.95107	-2.90058	-2.08647	-2.21161	-1.97558
YGR281W	YOR1	CR	30.0638	888	-0.00616198	-1.12814	-1.12242	-2.81158	-2.35497	-1.9813	-1.19999	-0.733575	-0.518351	-0.943188
YDR404C	RPB7	TFIID	30.0339	889	-0.071787	0.154573	-0.104943	-1.85494	-1.43893	-1.03933	-2.06306	-1.97972	-1.70667	-2.09428
YPL063W	TIM50	TFIID	30.0297	890	-0.0906602	0.112654	0.0555346	-1.72742	-1.37022	-0.972358	-2.77622	-2.17762	-2.20266	-2.01042
YML108W	YML108W	TFIID	30.0134	891	-0.230384	0.104818	0.35262	-0.303362	-0.778088	-0.340275	-2.73931	-2.89864	-2.50391	-2.09032
YHR205W	SCH9	TFIID	30.0061	892	0.0174166	0.0302005	-0.040348	-1.36499	-1.11461	-0.599743	-2.07248	-1.97408	-2.10196	-2.02787
YDL153C	SAS10	TFIID	29.9977	893	-0.19816	0.335422	0.412527	-0.8951	-1.43266	-0.836485	-2.59487	-2.13712	-2.23114	-1.8175
YLR452C	SST2	CR	29.9693	894	-0.0130749	0.00824823	-0.229484	-0.568914	-1.87575	-1.43634	-0.410526	-0.0432975	-0.438667	-0.399204
YJL158C	CIS3	CR	29.9676	895	-0.0455518	-1.01004	-1.09946	-2.12579	-3.54657	-3.01234	-1.23756	-0.418033	-0.233082	-0.885791
YLL018C	DPS1	TFIID	29.9635	896	-0.114913	0.367188	0.0544931	-0.957737	-0.964227	-0.500215	-2.17955	-1.52771	-1.63965	-1.48345
YDR069C	DOA4	CR	29.9448	897	0.0909388	-0.402415	-0.286607	-1.97464	-1.4936	-1.22992	-1.27268	-1.47998	-1.49371	-1.34759
YBR039W	ATP3	TFIID	29.9323	898	-0.189988	0.0615734	-0.0925675	-1.53933	-0.755679	-0.260833	-1.86538	-1.4748	-1.53435	-1.38339
YGL167C	PMR1	TFIID	29.931	899	0.0880814	-0.00260766	-0.0218399	-1.70309	-1.08498	-0.600257	-2.08348	-1.97807	-1.98485	-1.78266
YHR068W	DYS1	TFIID	29.9199	900	-0.15742	-0.142152	-0.226947	-1.29504	-1.38222	-1.05215	-2.29864	-1.76755	-1.7036	-1.58798
YBR207W	FTH1	TFIID	29.8945	901	-0.18153	-0.366596	-0.055849	-1.05651	-1.30448	-1.12442	-2.23031	-2.16425	-2.02541	-1.97669
YER125W	RSP5	TFIID	29.8863	902	-0.0234169	0.0867208	-0.148633	-2.01628	-1.53153	-0.955789	-2.19192	-1.9593	-1.93798	-1.79814
YDR303C	RSC3	TFIID	29.8817	903	-0.0327586	0.152823	0.263543	-2.20585	-1.2617	-0.812202	-1.90571	-2.08179	-1.96206	-1.92332
YGL092W	NUP145	TFIID	29.852	904	-0.0506251	0.037382	-0.0425721	-1.6443	-1.37625	-0.90265	-2.23083	-1.95593	-2.12973	-1.87376
YJL123C	MTC1	TFIID	29.8408	905	-0.0569446	0.16865	0.0188398	-1.63683	-1.23408	-0.785047	-2.51471	-2.36876	-2.33015	-2.31662
YOL097C	WRS1	TFIID	29.8348	906	-0.184249	0.293813	0.043801	-1.20661	-1.25769	-0.944078	-2.98485	-2.15802	-2.03197	-2.07483
YOR362C	PRE10	TFIID	29.8323	907	0.0707287	-0.139534	-0.357612	-1.64292	-1.80604	-1.23219	-2.4253	-1.83035	-1.80535	-2.09964
YKL007W	CAP1	TFIID	29.8127	908	-0.0367105	0.111396	-0.098691	-2.12361	-0.992994	-0.677308	-2.05257	-1.66592	-1.63173	-1.81968
YHR066W	SSF1	TFIID	29.8119	909	-0.211659	0.28631	0.453488	-0.59985	-1.41576	-0.901929	-2.40632	-2.25389	-2.19049	-1.94115
YGR119C	NUP57	TFIID	29.7806	910	-0.0475201	0.211627	0.12165	-1.47164	-1.10697	-0.702214	-1.82373	-1.57785	-1.73414	-1.95646
YDR324C	UTP4	TFIID	29.7799	911	-0.0420969	0.297853	0.22695	-1.1826	-1.35555	-0.88986	-2.80984	-2.67263	-2.818	-2.18381
YGL202W	ARO8	TFIID	29.7779	912	-0.00262147	0.0244606	-0.203006	-1.02793	-1.48333	-1.05593	-2.31049	-1.50388	-1.40546	-1.32051
YDR322C-A	TIM11	TFIID	29.7643	913	-0.144602	0.141056	-0.0485604	-1.10551	-0.395816	0.122398	-2.18778	-1.58485	-1.35051	-1.7852
YKL195W	MIA40	TFIID	29.7536	914	-0.0361951	0.0653735	-0.0475402	-1.93548	-1.38532	-0.919465	-2.09982	-1.6751	-1.99356	-2.2442
YDR052C	DBF4	TFIID	29.753	915	-0.0637513	0.0388731	0.14184	-1.87725	-1.2853	-0.643172	-2.09011	-2.01412	-2.14555	-1.9802
YDR245W	MNN10	TFIID	29.7428	916	-0.144112	-0.138677	-0.218215	-1.56214	-1.35931	-1.02458	-2.2813	-2.12574	-1.81437	-1.92965
YML008C	ERG6	CR	29.7202	917	-0.121614	-1.06893	-1.29821	-2.32179	-2.39852	-1.98354	-2.40822	-1.59418	-1.51086	-1.46992
YMR083W	ADH3	TFIID	29.6877	918	-0.295258	-0.412736	-0.788968	-0.48255	-1.08193	-1.0054	-2.30885	-1.7178	-1.37802	-1.64811
YBR172C	SMY2	TFIID	29.6723	919	-0.0261795	0.225383	0.247288	-1.16386	-1.07766	-0.706518	-1.86543	-1.71413	-2.06089	-1.92934
YJR137C	MET5	TFIID	29.6699	920	-0.0526985	0.321347	-0.501155	1.40635	-0.0309251	-0.0153261	0.0558055	-1.16716	-0.973053	-1.3112
YML053C	YML053C	TFIID	29.6585	921	-0.213957	0.421031	0.30931	-1.82547	-1.13202	-0.573464	-2.08229	-2.09994	-2.11147	-2.44088
YDL100C	GET3	TFIID	29.5805	922	-0.153561	0.0350118	-0.195918	-1.51995	-0.977519	-0.524654	-2.31016	-1.7085	-1.79989	-1.67384
YLR208W	SEC13	TFIID	29.5714	923	-0.0763966	0.0323741	-0.0633915	-1.46876	-1.02538	-0.579627	-1.92909	-1.76332	-1.78145	-1.76395
YDR145W	TAF12	TFIID	29.5655	924	-0.103314	0.227811	0.261034	-1.73213	-0.964014	-0.520917	-2.0245	-1.71357	-1.73235	-2.032
YDR412W	RRP17	TFIID	29.513	925	-0.164232	0.220779	0.325338	-1.35652	-1.23279	-0.737582	-2.65188	-2.04067	-2.42394	-2.59565
YHR098C	SFB3	TFIID	29.5056	926	-0.0889961	-0.190386	-0.216133	-1.94139	-1.42502	-1.03192	-2.7105	-2.29939	-2.41932	-2.07729
YGR284C	ERV29	TFIID	29.4869	927	-0.0641303	-0.0740092	-0.165092	-1.96506	-1.15792	-0.709592	-2.68026	-2.45047	-1.92766	-2.17321
YML117W	NAB6	TFIID	29.463	928	-0.0483952	-0.169584	-0.379388	-2.05951	-1.36533	-0.971782	-2.2512	-1.94167	-2.17808	-2.08285
YIL109C	SEC24	TFIID	29.4604	929	-0.0208914	-0.0836948	-0.308674	-1.84939	-1.51561	-1.02095	-2.30499	-1.91019	-2.01772	-1.87662
YOR182C	RPS30B	TFIID	29.4463	930	-0.182413	-0.120829	-0.0729861	-0.768919	-1.46213	-1.03956	-2.2894	-1.92424	-1.60786	-1.31896
YML072C	TCB3	TFIID	29.418	931	-0.0315323	-0.0391897	-0.34946	-1.91705	-1.59249	-1.06268	-2.51319	-1.87605	-2.02528	-1.71583
YDL205C	HEM3	CR	29.3306	932	0.091137	0.038932	-0.00214457	-1.25594	-1.61663	-0.996283	-0.673453	-0.966993	-0.914019	-1.10241
YDR208W	MSS4	TFIID	29.3103	933	-0.127893	-0.00200177	0.00239472	-1.68521	-1.23186	-0.826508	-2.16328	-2.2859	-2.11696	-2.10432
YLR403W	SFP1	TFIID	29.2906	934	-0.0723033	-0.254945	-0.18825	-1.31741	-1.24703	-0.982886	-1.69671	-1.98204	-2.03501	-1.55926
YNL302C	RPS19B	TFIID	29.2869	935	-0.148875	-0.0736098	-0.331398	-1.17867	-1.58218	-1.1953	-2.47346	-1.65268	-1.63006	-1.31747
YOR058C	ASE1	TFIID	29.2528	936	0.0648414	-0.213027	-0.09542	-0.857202	0.096629	0.117156	-1.56316	-1.48226	-1.60926	-1.65774
YDR251W	PAM1	TFIID	29.2341	937	0.0243211	-0.169872	-0.289998	-2.11246	-1.36643	-0.920922	-2.29513	-2.32634	-2.23486	-2.2028
YDR361C	BCP1	TFIID	29.2329	938	-0.0928975	0.0386595	-0.0180481	-0.843892	-1.42	-1.14073	-2.64543	-2.3972	-2.20218	-2.35186
YDR170C	SEC7	TFIID	29.2184	939	0.0406794	0.0538574	-0.0630458	-1.69242	-1.24248	-0.647048	-2.25386	-1.78158	-1.84238	-1.62466
YHR023W	MYO1	TFIID	29.2181	940	-0.0811259	-0.0626898	-0.0131478	-1.91715	-1.13495	-0.553263	-2.76949	-2.41644	-2.51961	-2.18233
YPL218W	SAR1	TFIID	29.2171	941	-0.213889	0.024836	-0.093356	-1.44629	-0.970942	-0.499655	-2.27095	-1.86738	-1.15782	-1.46502
YLR309C	IMH1	TFIID	29.2044	942	-0.10625	0.206623	0.33892	-1.61051	-0.451247	0.170544	-2.19572	-1.85526	-2.0644	-2.04594
YHR010W	RPL27A	TFIID	29.1368	943	-0.149476	-0.119706	-0.203553	-0.947138	-1.51659	-1.01421	-2.2801	-1.79297	-1.66075	-0.983469
YJR073C	OPI3	CR	29.107	944	-0.343008	-0.941902	-0.124899	-5.47187	-4.11212	-3.45912	-1.94939	-2.4417	-1.80427	-1.6524
YLR192C	HCR1	TFIID	29.1004	945	-0.183677	-7.96e-05	0.0965894	-1.17823	-1.33381	-0.769882	-2.9237	-1.80851	-2.10239	-1.81231
YDL004W	ATP16	TFIID	29.0796	946	-0.0768847	0.0609369	-0.42125	-1.74378	-0.781191	-0.445989	-2.49971	-1.80766	-1.7539	-1.80286
YJR002W	MPP10	TFIID	29.077	947	-0.141952	0.208813	0.266072	-1.18195	-1.3403	-0.86735	-2.32395	-2.39638	-2.57315	-1.94676
YMR033W	ARP9	TFIID	29.0571	948	-0.0102836	0.074252	0.108883	-1.64396	-1.00102	-0.501001	-1.59287	-1.95654	-2.13145	-1.78578
YNL247W	YNL247W	TFIID	29.0515	949	-0.142125	0.130298	0.0232899	-1.29163	-1.47428	-0.938474	-2.01145	-1.69912	-1.90864	-1.63426
YOR047C	STD1	CR	29.0487	950	-0.0357816	-0.0256432	-0.04436	-1.82854	-1.68608	-1.23189	-1.14058	-0.920234	-1.09346	-1.15204
YGL026C	TRP5	TFIID	29.0353	951	0.00453647	0.184063	-0.107828	-0.549442	-0.873772	-0.618409	-2.1364	-1.70215	-1.44535	-1.61185
YCR002C	CDC10	TFIID	29.0324	952	-0.0711357	-0.0170914	0.0813641	-1.43375	-0.86881	-0.476667	-2.25693	-1.97128	-1.72358	-1.96444
YLR435W	TSR2	TFIID	29.0037	953	-0.186995	0.261776	0.116872	-0.88473	-1.0164	-0.393482	-2.66706	-2.30501	-2.08372	-2.16089
YGR189C	CRH1	CR	28.9816	954	-0.131302	-0.701025	-0.640411	-1.82386	-2.02783	-1.33671	-1.14324	-0.613981	-0.618171	-0.941555
YDL015C	TSC13	TFIID	28.9768	955	0.00865908	-0.113117	-0.27758	-1.59473	-1.54268	-0.953252	-2.49352	-2.04967	-1.70244	-1.50205
YDR457W	TOM1	TFIID	28.972	956	0.0724605	0.19658	0.0232372	-1.61182	-0.94622	-0.480322	-1.64824	-1.58955	-1.67127	-1.49259
YKL135C	APL2	TFIID	28.9715	957	-0.107802	0.0920351	0.0943347	-1.59813	-0.82881	-0.397872	-2.02887	-1.87293	-2.02468	-1.83698
YKL142W	MRP8	TFIID	28.9261	958	-0.195527	-0.527005	-0.442194	-2.76317	-1.54365	-1.12183	-2.24162	-1.45041	-1.85043	-1.61625
YJR065C	ARP3	TFIID	28.9208	959	-0.105661	0.0626282	-0.0986119	-2.2796	-1.34791	-0.86254	-1.94701	-1.53385	-1.57351	-1.70855
YKL086W	SRX1	CR	28.9188	960	0.799276	-0.643707	-1.55889	-1.98945	-2.72034	-2.26762	0.406172	0.497133	0.446311	-0.432651
YDL051W	LHP1	TFIID	28.8883	961	-0.219938	0.294839	0.0401102	-0.891117	-1.17149	-1.01333	-2.67577	-2.17369	-2.44936	-2.05672
YLR129W	DIP2	TFIID	28.8827	962	-0.0182968	0.186718	0.132168	-1.21982	-1.39753	-0.801013	-2.48149	-2.25981	-2.32464	-1.91331
YKL014C	URB1	TFIID	28.8733	963	-0.10854	0.196091	0.278355	-1.40774	-1.27063	-0.743552	-2.08633	-1.93031	-1.8921	-1.74736
YJL039C	NUP192	TFIID	28.8215	964	-0.0260129	0.00264555	0.0205459	-1.7076	-1.28686	-0.765855	-2.03861	-1.88821	-1.87485	-1.74386
YJL122W	ALB1	TFIID	28.8094	965	-0.221834	0.352162	0.335891	-0.968809	-1.54887	-1.19639	-2.85471	-2.07625	-2.29483	-2.22859
YGL070C	RPB9	TFIID	28.7618	966	-0.0665104	0.171421	0.0135104	-1.20608	-1.25165	-0.860312	-1.89519	-1.6617	-1.44627	-1.63338
YLL051C	FRE6	TFIID	28.7556	967	-0.324253	-0.444377	-0.165213	-0.878988	-1.76361	-1.60164	-1.83682	-2.41551	-2.19833	-2.08053
YER180C-A	SLO1	TFIID	28.735	968	-0.344434	0.0835217	0.108436	-1.87373	-1.11341	-0.747108	-2.50462	-2.69838	-2.2212	-2.25054
YER042W	MXR1	CR	28.7157	969	-0.27687	-0.52596	-0.64838	0.328007	-1.27138	-1.07524	-0.625201	-1.12978	-0.292911	-1.10962
YDL161W	ENT1	TFIID	28.704	970	-0.162507	0.0370458	0.0798492	-1.67507	-1.12726	-0.505996	-2.16477	-2.00672	-2.20978	-2.24773
YKL077W	YKL077W	TFIID	28.6773	971	-0.200157	-0.00899986	-0.0998389	-1.60374	-1.2059	-0.817811	-2.51841	-2.22992	-1.85273	-1.93238
YLR170C	APS1	TFIID	28.6718	972	-0.0879801	0.0166048	0.00703349	-1.74907	-1.10727	-0.622142	-2.57056	-1.9143	-1.74137	-1.90184
YMR216C	SKY1	TFIID	28.6428	973	-0.00185259	-0.00971391	-0.105918	-1.39629	-1.49597	-1.10634	-2.00839	-1.88667	-2.02805	-2.0732
YLR223C	IFH1	TFIID	28.6196	974	-0.0457117	0.222319	0.369862	-0.742328	-1.01418	-0.531894	-1.81395	-1.83024	-2.02675	-1.74146
YNL271C	BNI1	TFIID	28.612	975	-0.0228738	0.0767624	0.0423674	-1.96582	-1.28949	-0.720264	-2.23383	-1.94853	-2.13743	-1.7872
YGL225W	VRG4	TFIID	28.6088	976	-0.113778	-0.166919	-0.434706	-1.64201	-1.49449	-1.17614	-1.96653	-1.79156	-1.18932	-1.49145
YLR206W	ENT2	TFIID	28.6	977	-0.0760821	0.12017	0.0264788	-2.23032	-1.27808	-0.726764	-1.83807	-1.64295	-1.88939	-2.02598
YER117W	RPL23B	TFIID	28.5996	978	-0.0650978	0.0234207	-0.313372	-0.857297	-1.60423	-1.09231	-2.46952	-1.95663	-1.53148	-1.35346
YNR035C	ARC35	TFIID	28.5926	979	-0.321903	0.133703	-0.0315677	-1.92683	-1.32924	-0.688287	-2.18502	-1.74373	-1.78223	-2.12493
YGL117W	YGL117W	CR	28.5728	980	0.0521556	-0.829188	-0.705787	-0.276501	-1.21219	-1.29217	-1.00159	-0.320238	-0.0884962	-0.706989
YOR187W	TUF1	TFIID	28.5149	981	-0.150892	0.0854725	-0.17229	-1.73597	-0.881179	-0.421737	-2.5754	-1.95931	-1.94795	-2.07836
YMR109W	MYO5	TFIID	28.5112	982	0.0551676	-0.0136507	-0.0827572	-2.13886	-1.24254	-0.731641	-1.93856	-1.74188	-1.95691	-1.72565
YNL213C	RRG9	TFIID	28.5066	983	-0.0848524	-0.13566	-0.189683	-1.34702	-1.10854	-0.954343	-1.43085	-1.58945	-1.50663	-1.86182
YNL055C	POR1	CR	28.4969	984	-0.0950937	-0.679578	-0.969714	-0.655491	-0.824731	-0.534044	-1.47683	-0.63831	-0.720571	-0.661971
YOL038W	PRE6	TFIID	28.487	985	-0.0425566	-0.160972	-0.36298	-1.70494	-1.55742	-1.03203	-1.75786	-1.82273	-1.51256	-1.75211
YER161C	SPT2	TFIID	28.4439	986	-0.043237	0.170916	0.226108	-1.62996	-1.14958	-0.585468	-2.07968	-1.58851	-1.74377	-1.86372
YJL179W	PFD1	TFIID	28.4318	987	-0.185118	0.419882	0.395659	-1.12868	-0.771808	-0.170634	-2.46174	-1.97881	-1.62996	-2.09695
YLR225C	YLR225C	CR	28.4243	988	-0.0506765	-0.243993	-0.25496	-1.52654	-0.797552	-0.0823474	-0.731524	-0.619898	-0.431224	-0.959489
YLL048C	YBT1	TFIID	28.4163	989	-0.0102006	0.18104	-0.0250478	-1.43713	-1.13113	-0.66254	-1.97538	-1.55527	-1.49261	-1.47937
YDR300C	PRO1	TFIID	28.3997	990	0.117174	0.0319667	0.155847	-1.19442	-1.22029	-0.789666	-2.27493	-2.11231	-2.21642	-2.12052
YPR133C	SPN1	TFIID	28.3751	991	-0.139698	0.178412	0.144672	-1.42499	-1.07562	-0.502827	-1.68066	-1.51054	-1.65442	-1.63273
YHL047C	ARN2	CR	28.2679	992	-1.00508	-1.06375	0.384379	-0.915716	-3.43011	-3.11328	-1.81023	-1.2532	-1.10129	-1.36977
YML048W	GSF2	CR	28.2425	993	0.0460511	0.0439792	-0.277198	-1.60777	-1.28675	-0.915358	-1.21752	-1.57637	-1.37089	-0.917534
YOL076W	MDM20	TFIID	28.2133	994	-0.0807193	0.0549687	-0.0714105	-1.75324	-1.51682	-0.916455	-1.8608	-1.88557	-1.77204	-1.71205
YPR173C	VPS4	TFIID	28.2132	995	-0.160258	0.129691	-0.0230902	-1.74128	-1.30965	-0.706792	-2.09349	-1.76786	-2.05713	-2.17472
YIL128W	MET18	TFIID	28.16	996	-0.0335767	0.171305	0.109195	-1.63124	-0.690745	-0.138785	-1.91408	-1.73993	-1.96779	-1.82196
YLR378C	SEC61	TFIID	28.158	997	0.00181103	-0.0752941	-0.243979	-1.60839	-1.64948	-1.11613	-2.64549	-2.17891	-2.01997	-2.02595
YKR001C	VPS1	TFIID	28.1394	998	-0.151577	0.0458223	-0.114333	-2.06471	-1.40066	-0.612873	-2.00777	-1.88594	-1.91928	-1.65355
YHR081W	LRP1	TFIID	28.1125	999	-0.21817	0.220169	0.282544	-1.29335	-1.11855	-0.907819	-2.34888	-2.43764	-2.05029	-2.35298
YNL175C	NOP13	TFIID	28.1063	1000	-0.215502	-0.149145	0.0947566	-1.03246	-1.56839	-1.09873	-3.13472	-2.48102	-2.52331	-2.31711
YFR009W	GCN20	TFIID	28.101	1001	-0.0257823	0.214862	-0.00444995	-1.72094	-1.44883	-0.818541	-2.57321	-2.17189	-2.21321	-1.80275
YDL022W	GPD1	CR	28.0632	1002	0.139067	-1.50942	-1.80923	-4.1473	-5.24328	-5.01226	-1.18889	-0.309729	-0.109441	-1.35033
YGL068W	MNP1	TFIID	28.0181	1003	-0.0354065	0.206312	-0.00598826	-1.56137	-1.48927	-0.596229	-2.00277	-1.55828	-1.56495	-2.09891
YBR112C	CYC8	TFIID	28.0175	1004	-0.188968	-0.12109	-0.0911424	-2.19183	-1.69503	-0.994476	-2.6504	-2.29749	-2.84653	-2.46744
YMR080C	NAM7	TFIID	28.0014	1005	0.0418596	0.116808	0.0327567	-1.30605	-1.14215	-0.707821	-2.0993	-1.90714	-1.84889	-1.59392
YGR214W	RPS0A	TFIID	27.9994	1006	-0.168461	-0.0337244	-0.142109	-1.2744	-1.57111	-1.22915	-2.32969	-1.50628	-1.6431	-1.21251
YPR029C	APL4	TFIID	27.965	1007	-0.124354	0.0313913	0.0567298	-2.00535	-0.997375	-0.546523	-1.9557	-1.88439	-1.94535	-1.7918
YER086W	ILV1	TFIID	27.9273	1008	-0.134536	0.240426	0.000514149	-0.541459	-0.633964	-0.324105	-2.21145	-1.93182	-2.01981	-1.70378
YMR200W	ROT1	TFIID	27.9145	1009	-0.0578532	0.194396	-0.0122822	-0.892329	-0.742944	-0.428326	-2.08771	-2.35574	-1.73256	-2.36472
YDR432W	NPL3	TFIID	27.9104	1010	-0.102379	-0.387551	-0.314792	-1.62812	-1.75321	-0.993633	-1.70024	-1.9798	-1.61135	-1.17388
YCR035C	RRP43	TFIID	27.8989	1011	-0.285985	0.218125	0.213022	-1.10448	-1.1035	-0.571476	-2.27332	-2.27765	-2.5981	-2.15659
YMR031C	EIS1	CR	27.8948	1012	0.0222094	-0.395256	-0.53082	-3.29841	-1.96127	-1.51872	-1.96182	-1.59182	-1.75612	-1.87058
YLR250W	SSP120	TFIID	27.8848	1013	0.0309018	-0.0136189	-0.0958227	-1.37321	-0.998762	-0.950637	-2.68159	-2.33167	-2.32541	-2.23112
YKR035W-A	DID2	TFIID	27.8848	1014	-0.230233	0.150416	0.309347	-1.51804	-1.25146	-0.751238	-2.26011	-1.66039	-2.08843	-2.02771
YIL027C	EMC5	TFIID	27.8786	1015	-0.21282	0.228366	0.315765	-1.2267	-0.610436	-0.397901	-2.05934	-1.71409	-1.72518	-1.56804
YHL040C	ARN1	CR	27.8676	1016	-0.724577	-1.14117	-0.606209	-0.389285	-2.96397	-2.8859	-0.210191	-0.443248	-0.0816958	-0.826204
YCR016W	YCR016W	TFIID	27.8451	1017	-0.158695	0.121575	0.253352	-1.09101	-1.19859	-0.735686	-2.55155	-2.41188	-2.58713	-2.13777
YGR271C-A	EFG1	TFIID	27.8428	1018	-0.22156	0.244607	0.533876	-0.713466	-0.960498	-0.400375	-2.3556	-2.34229	-2.47822	-2.26615
YDL121C	YDL121C	TFIID	27.8414	1019	-0.278285	0.220085	0.230307	-0.448592	-0.780075	-0.414639	-2.51419	-2.09358	-2.03987	-1.72347
YPR148C	YPR148C	TFIID	27.8159	1020	-0.0697832	0.111354	0.00350029	-1.50844	-0.92549	-0.236701	-2.98124	-2.42474	-2.76083	-2.58957
YLR330W	CHS5	TFIID	27.778	1021	-0.0948977	0.10711	0.161853	-1.90957	-1.28104	-0.75209	-2.20978	-1.89206	-2.01497	-1.92637
YLR222C	UTP13	TFIID	27.7551	1022	-0.182309	0.285575	0.238485	-1.01165	-1.23469	-0.770338	-2.3971	-2.21063	-2.27794	-1.92109
YDR510W	SMT3	TFIID	27.7371	1023	-0.0963609	-0.114689	-0.459485	-1.78846	-1.73708	-1.13814	-2.65672	-1.83873	-0.858034	-0.923318
YIL040W	APQ12	TFIID	27.7277	1024	-0.199692	0.0935873	0.0339164	-1.28304	-0.976855	-0.570563	-2.84432	-2.3701	-2.15594	-2.70706
YDL002C	NHP10	TFIID	27.7144	1025	-0.105081	-0.183781	-0.22732	-1.68657	-1.29096	-0.603895	-2.53698	-2.40352	-2.36914	-2.52749
YNR001C	CIT1	CR	27.7099	1026	-0.0680338	-0.6328	-1.08634	-1.35325	-1.69332	-1.2797	-0.230964	0.397201	0.374804	-0.711179
YDL099W	BUG1	TFIID	27.669	1027	-0.159436	0.0985937	0.315414	-1.5704	-1.11449	-0.237045	-2.15988	-1.47855	-1.77203	-2.07422
YDR339C	FCF1	TFIID	27.6644	1028	-0.216228	0.0973912	0.144466	-1.22331	-1.32839	-0.573962	-2.04584	-1.97046	-2.41249	-2.04194
YMR043W	MCM1	CR	27.6527	1029	-0.101714	-0.160743	-0.0772618	-2.13037	-2.43555	-1.66146	-1.43484	-1.06707	-1.11294	-1.33584
YML069W	POB3	TFIID	27.6356	1030	-0.00666666	0.114994	0.0913958	-1.62417	-0.909193	-0.331922	-1.95629	-1.72415	-1.99782	-1.70077
YLR168C	UPS2	CR	27.6251	1031	-0.144265	-0.318318	-0.0643454	-3.14764	-2.15776	-1.6589	-0.26068	-0.267769	-0.739007	-0.449799
YML010W	SPT5	TFIID	27.6243	1032	-0.0192353	0.272342	0.0823153	-1.72607	-1.19691	-0.712647	-1.99218	-1.90358	-2.01173	-1.82836
YLL009C	COX17	TFIID	27.6173	1033	-0.116252	0.366534	0.316414	-1.17873	-0.564851	0.283485	-2.12539	-1.87184	-1.48571	-1.66812
YEL015W	EDC3	TFIID	27.6081	1034	-0.0288037	0.0820669	0.113234	-1.56456	-0.895363	-0.703436	-1.90684	-1.93892	-1.68346	-1.88252
YLL008W	DRS1	TFIID	27.5955	1035	-0.168044	0.40791	0.38159	-0.886743	-1.31581	-0.6941	-2.62555	-2.25049	-2.45166	-2.05477
YBR173C	UMP1	TFIID	27.5888	1036	-0.117329	0.0633612	-0.0478441	-1.50718	-1.21234	-0.578981	-1.91782	-2.03887	-1.87922	-1.97564
YIL130W	ASG1	TFIID	27.5248	1037	-0.0983368	0.0981634	0.173048	-1.37663	-1.28009	-0.799433	-2.17742	-2.16122	-2.19033	-2.04596
YGR083C	GCD2	TFIID	27.5071	1038	-0.0979855	0.282491	0.398129	-1.32674	-1.20367	-0.604679	-2.30552	-1.77872	-2.1184	-2.03804
YOR028C	CIN5	CR	27.4565	1039	0.271381	-0.603223	-0.549534	-2.97815	-2.63148	-2.12275	-0.196979	0.0483542	-0.0220736	-0.854467
YER138W-A	YER138W-A	CR	27.4526	1040	-0.086729	-0.551401	-0.242898	0.225346	-0.290538	0.077646	-0.739922	0.0926224	-0.510088	-0.954226
YIL074C	SER33	TFIID	27.424	1041	-0.18331	0.0325368	-0.573822	0.0909181	-1.12408	-1.12561	-0.891937	-1.80494	-1.64301	-1.7037
YJR064W	CCT5	TFIID	27.3962	1042	-0.0294376	0.0893079	-0.119818	-1.40668	-1.42297	-0.942892	-2.04942	-1.9401	-1.81608	-1.77346
YOR239W	ABP140	TFIID	27.3637	1043	-0.0274875	-0.0508555	-0.0382489	-1.72192	-1.10575	-0.666911	-2.33258	-1.76495	-2.35021	-1.9661
YMR049C	ERB1	TFIID	27.3597	1044	-0.104785	0.203941	0.284534	-0.899281	-1.36215	-0.869762	-2.66283	-2.30323	-2.32666	-2.17347
YNL186W	UBP10	TFIID	27.3011	1045	-0.0811581	-0.0906639	-0.1588	-1.39999	-1.56228	-1.14728	-2.77044	-2.68713	-2.78647	-2.19064
YGR105W	VMA21	TFIID	27.2569	1046	-0.0217438	0.241484	-0.0566317	-1.47693	-1.021	-0.408369	-2.38289	-1.84225	-1.77866	-1.30517
YPL010W	RET3	TFIID	27.2416	1047	-0.120625	0.0739378	-0.0597531	-1.4025	-0.827539	-0.467654	-2.16172	-1.91787	-1.6056	-1.83189
YPR112C	MRD1	TFIID	27.2185	1048	-0.15439	0.312436	0.525792	-0.748422	-1.27645	-0.80084	-2.38471	-2.40301	-2.26286	-2.05434
YBR248C	HIS7	TFIID	27.205	1049	0.122528	0.286095	0.189417	-0.477295	-0.940551	-0.661056	-1.94159	-1.56021	-1.51374	-1.60173
YNL077W	APJ1	TFIID	27.2048	1050	-0.0380122	0.186271	0.298156	-1.95644	-1.49087	-1.10111	-1.96452	-2.17649	-2.22694	-2.43584
YOR020W-A	YOR020W-A	TFIID	27.2043	1051	-0.16937	-0.138248	-0.0895583	-1.75446	-1.40368	-1.12677	-2.89802	-1.95898	-2.29477	-2.30534
YPL032C	SVL3	TFIID	27.1954	1052	-0.0159293	-0.261931	-0.801599	-2.32163	-2.04423	-1.46691	-3.00886	-2.42308	-2.55751	-2.20092
YDL225W	SHS1	TFIID	27.1898	1053	-0.113187	0.104278	0.158038	-1.4827	-1.00678	-0.438207	-2.15384	-1.61082	-2.03032	-1.80656
YGR180C	RNR4	CR	27.1598	1054	-0.452187	-0.678776	-0.60684	-2.08185	-2.17719	-1.64193	-1.86173	-0.866533	-0.809179	-0.896353
YKL212W	SAC1	TFIID	27.1539	1055	-0.103387	-0.0379789	-0.219161	-1.64006	-1.18499	-0.884859	-2.34954	-1.9884	-2.02385	-1.83276
YMR290C	HAS1	TFIID	27.1518	1056	-0.161945	0.135843	0.126114	-0.555839	-1.64864	-1.11317	-2.82926	-2.43314	-2.27465	-2.05883
YLR256W	HAP1	CR	27.1333	1057	-0.175621	-0.949092	-0.737103	-2.61977	-1.98326	-1.603	-1.34516	-1.02119	-1.06154	-1.1644
YJR090C	GRR1	TFIID	27.1249	1058	-0.0360715	0.0271143	0.101877	-1.76019	-1.1856	-0.720968	-1.56891	-1.71347	-1.84587	-1.60617
YBR048W	RPS11B	CR	27.12	1059	-0.0971743	0.138582	0.0341851	-1.40961	-1.60346	-1.09554	-1.8503	-1.25079	-1.13473	-0.51216
YHR088W	RPF1	TFIID	27.0995	1060	-0.252177	0.217146	0.260313	-0.672399	-1.37353	-0.653503	-2.37042	-2.41626	-2.03343	-1.90975
YHL036W	MUP3	CR	27.0929	1061	0.167898	-0.952185	-0.639856	-0.96915	-0.84036	-0.922523	-0.0826796	-0.609355	-0.196531	-0.872308
YIL036W	CST6	TFIID	27.0421	1062	-0.000661972	0.0413402	0.0462925	-1.96454	-0.958504	-0.524449	-1.88517	-1.70527	-1.80151	-1.93437
YBL105C	PKC1	TFIID	27.0369	1063	0.0283902	0.148581	0.136157	-1.65404	-0.846138	-0.500007	-1.79968	-1.76886	-1.99046	-1.77378
YJR044C	VPS55	TFIID	27.0329	1064	-0.110944	-0.0361171	-0.185434	-2.06925	-1.14152	-0.577086	-2.35318	-2.25989	-1.99856	-2.06806
YNL176C	TDA7	CR	27.0008	1065	-0.00612335	-0.818264	-0.806322	-1.70624	-2.36612	-1.80908	-1.591	-1.49753	-1.56574	-1.8314
YOR158W	PET123	TFIID	26.9932	1066	-0.0832674	0.135285	0.106664	-1.71195	-1.2296	-0.560765	-1.99675	-1.53626	-2.12037	-1.89697
YKL175W	ZRT3	TFIID	26.9909	1067	-0.266165	-0.468874	-0.00755904	-1.86018	-1.55327	-0.986208	-1.26071	-2.14371	-2.36861	-2.16594
YGL086W	MAD1	TFIID	26.9867	1068	-0.158136	0.0723599	0.29627	-1.90397	-1.14576	-0.599878	-1.83716	-1.61163	-1.98648	-1.83132
YER105C	NUP157	TFIID	26.9813	1069	-0.0303681	0.172565	0.132532	-1.70955	-1.01423	-0.553231	-2.03071	-1.84806	-1.95494	-1.82336
YEL022W	GEA2	TFIID	26.9593	1070	-0.154169	0.125789	0.200033	-1.80427	-1.00875	-0.477533	-1.99058	-1.74129	-1.96817	-1.58233
YBR017C	KAP104	TFIID	26.9534	1071	-0.0617701	0.129702	-0.00337707	-1.60536	-1.30733	-0.881032	-2.16956	-2.0097	-1.93371	-1.95044
YPR144C	NOC4	TFIID	26.9291	1072	-0.117684	0.139124	0.228975	-0.545158	-1.52586	-0.874798	-2.7314	-2.49338	-2.60775	-2.01699
YBR171W	SEC66	TFIID	26.9237	1073	0.00101022	-0.0087891	-0.0230587	-1.76503	-1.2677	-0.937362	-2.36486	-2.10643	-1.88021	-1.9208
YDL088C	ASM4	TFIID	26.8991	1074	0.0219137	0.172885	0.212033	-1.71106	-0.909501	-0.606287	-1.44362	-1.6912	-2.02192	-1.71241
YEL002C	WBP1	TFIID	26.8575	1075	0.0114896	-0.00813296	-0.0107404	-1.59021	-1.1047	-0.541836	-2.38055	-1.84528	-1.68485	-1.60321
YHR039C-A	VMA10	TFIID	26.8158	1076	-0.388734	-0.154135	0.0908729	-1.54492	-1.36137	-0.823081	-2.53955	-1.46245	-1.69988	-1.15468
YNL123W	NMA111	TFIID	26.8053	1077	0.00894972	0.0747351	-0.114714	-1.13612	-1.28673	-0.860589	-2.20476	-2.03637	-2.06844	-1.69421
YIL144W	NDC80	TFIID	26.7818	1078	-0.0933626	-0.0828831	0.181632	-2.05473	-1.00291	-0.530891	-1.64125	-1.54087	-1.67955	-1.84671
YFL034C-A	RPL22B	TFIID	26.7558	1079	-0.0134393	-0.113849	-0.187209	-0.53309	-1.04205	-0.780894	-2.072	-2.44479	-2.18294	-2.19328
YNL177C	MRPL22	TFIID	26.6928	1080	-0.102675	0.214704	0.118837	-1.83337	-1.14465	-0.723337	-2.03468	-1.48882	-1.49557	-1.86696
YLR153C	ACS2	CR	26.682	1081	-0.0375363	-0.232776	-0.439576	-1.78228	-1.63405	-1.26002	-1.68301	-1.19634	-1.20018	-1.35167
YPR048W	TAH18	TFIID	26.6558	1082	0.0116096	0.03047	-0.113168	-0.77949	-1.25596	-1.10534	-1.51556	-1.72606	-1.57951	-1.53596
YPL217C	BMS1	TFIID	26.6528	1083	-0.0450131	0.241205	0.197509	-1.14488	-1.29255	-0.774832	-2.63632	-2.33428	-2.55714	-2.10684
YLR200W	YKE2	TFIID	26.6506	1084	-0.169298	0.20562	0.321754	-1.09548	-1.01543	-0.631324	-2.40446	-1.59164	-2.03213	-2.11612
YJL076W	NET1	TFIID	26.5853	1085	-0.0961561	0.0867174	0.0927998	-1.84904	-1.16789	-0.670523	-2.24799	-1.98209	-2.12199	-1.7844
YER056C-A	RPL34A	TFIID	26.5781	1086	-0.135825	-0.123266	-0.192278	-1.55335	-1.69363	-1.25369	-3.08038	-1.59878	-1.37087	-1.46195
YLR163C	MAS1	TFIID	26.5387	1087	0.0848139	-0.0809821	-0.158214	-1.25593	-1.30905	-0.873307	-1.99471	-1.75479	-1.91197	-1.81393
YLR022C	SDO1	TFIID	26.5161	1088	-0.05005	0.230071	0.272737	-1.30069	-1.08153	-0.823684	-3.05933	-3.09799	-2.74712	-2.28127
YER068W	MOT2	TFIID	26.5144	1089	-0.0455788	0.0167976	0.0249666	-1.88383	-1.16373	-0.772797	-1.93718	-1.87892	-1.89395	-2.09231
YPR060C	ARO7	TFIID	26.5036	1090	-0.186085	0.213183	0.0562767	-1.23955	-1.40276	-1.04486	-2.65042	-2.3619	-2.33263	-2.43159
YHL020C	OPI1	TFIID	26.4875	1091	-0.089577	-0.1582	0.0423368	-2.41894	-1.28655	-1.07874	-2.17964	-1.97186	-2.22168	-2.33954
YDL005C	MED2	TFIID	26.4752	1092	-0.0651989	0.0693847	0.275705	-1.87148	-0.910671	-0.395933	-2.35646	-2.00068	-2.42321	-2.04013
YIL105C	SLM1	TFIID	26.4727	1093	-0.0679825	0.0984988	0.0608093	-2.22065	-1.26601	-0.817613	-1.56659	-1.79797	-1.92246	-1.80727
YMR010W	YMR010W	TFIID	26.4715	1094	0.0582509	-0.096538	-0.170659	-1.52027	-1.01801	-0.63259	-2.30131	-2.07927	-1.84986	-1.7123
YAL029C	MYO4	TFIID	26.4537	1095	-0.0528954	0.0835077	0.0203311	-1.6553	-1.15778	-0.683774	-2.54663	-2.09072	-2.26737	-1.9338
YJL026W	RNR2	CR	26.4405	1096	-0.228559	-0.583477	-0.4177	-1.83924	-1.44776	-1.11781	-1.88556	-0.990963	-1.10877	-1.09264
YGR009C	SEC9	TFIID	26.433	1097	-0.103166	0.0955097	0.114243	-1.25329	-1.0295	-0.556908	-1.58196	-1.36493	-1.81822	-1.6502
YMR090W	YMR090W	CR	26.4069	1098	0.323351	-1.18897	-1.4932	-2.89566	-2.30391	-1.82076	-0.266204	0.0255598	0.0479329	-0.654471
YOL028C	YAP7	TFIID	26.3836	1099	0.256176	0.00680342	-0.225071	-1.20808	-1.15415	-1.14189	-1.30313	-1.48668	-1.58729	-1.71706
YIL076W	SEC28	TFIID	26.3765	1100	-0.206177	0.0938164	-0.0064007	-1.59939	-1.29656	-0.920789	-2.24794	-1.91693	-1.40171	-1.74341
YBL058W	SHP1	TFIID	26.3499	1101	-0.0382397	0.011234	-0.237281	-1.75942	-1.32083	-0.787991	-1.80173	-1.681	-1.81476	-1.70316
YBR047W	FMP23	TFIID	26.3433	1102	-0.0832823	-0.587194	-0.986779	-0.0673787	-0.973971	-1.01161	-2.76265	-2.67689	-2.40694	-2.76496
YBR069C	TAT1	CR	26.3251	1103	-0.0453653	-1.52278	-1.51871	-3.08696	-4.6138	-3.97936	-1.29415	-0.80195	-0.804975	-1.1928
YOL036W	YOL036W	TFIID	26.314	1104	0.0241883	0.0422555	0.108756	-1.38395	-0.969014	-0.718651	-1.49088	-1.79899	-1.96413	-1.71381
YER050C	RSM18	TFIID	26.3129	1105	-0.191865	0.550049	0.198414	-1.27511	-0.846107	-0.653539	-1.86704	-2.0005	-1.68407	-2.20449
YCR084C	TUP1	TFIID	26.303	1106	-0.0540327	0.116062	0.0403037	-1.88995	-1.57757	-0.86905	-2.50902	-2.13644	-2.28941	-2.35503
YOL064C	MET22	TFIID	26.2931	1107	-0.0850945	0.405509	0.117107	0.589399	0.116617	0.351058	-2.3094	-2.31393	-2.11532	-2.3409
YLR034C	SMF3	CR	26.2424	1108	-0.425513	-0.250067	0.0404779	-1.3635	-1.43794	-1.11822	-1.07206	-1.07355	-0.810538	-1.17816
YPR101W	SNT309	TFIID	26.2356	1109	-0.071444	0.0798459	0.164611	-1.16757	-0.812418	-0.181102	-1.29272	-1.70895	-1.11595	-1.55253
YLR229C	CDC42	TFIID	26.2084	1110	-0.11969	0.243222	-0.221715	-1.7876	-1.46852	-0.844352	-2.68951	-2.3215	-2.10587	-2.0955
YJR070C	LIA1	TFIID	26.1828	1111	-0.170171	0.0900116	-0.185638	-0.97174	-1.72764	-1.46234	-2.39116	-1.94981	-1.85486	-1.71488
YPR168W	NUT2	TFIID	26.1778	1112	-0.220732	-0.0875323	0.241021	-0.942564	-0.569623	-0.378212	-2.31382	-2.18642	-2.54248	-2.0454
YLR287C	YLR287C	TFIID	26.1754	1113	-0.189044	0.0610426	0.120129	-0.693427	-1.16789	-0.705523	-2.31553	-2.01566	-2.064	-2.09232
YKL032C	IXR1	TFIID	26.1545	1114	-0.184712	0.3152	0.507013	-1.4633	-0.924173	-0.502786	-2.75516	-2.96333	-2.77294	-2.62885
YGR233C	PHO81	TFIID	26.1189	1115	-0.148785	-0.0678273	-0.0768341	-3.36504	-2.60767	-2.16361	-2.29107	-2.0575	-2.24452	-2.13819
YDR354W	TRP4	TFIID	26.1099	1116	-0.174377	-0.0194358	-0.0701461	-0.12909	-0.518622	-0.423337	-2.15825	-0.815824	-0.949354	-1.10671
YJR004C	SAG1	CR	26.0543	1117	-0.34355	-0.155422	-0.64768	-1.69618	-3.16841	-2.76872	-2.46542	-0.422475	-0.775712	-0.704394
YKR016W	MIC60	TFIID	26.0317	1118	-0.0400926	0.0789656	-0.0388609	-1.99815	-0.869435	-0.393358	-2.30131	-1.76634	-1.88428	-1.89076
YGL071W	AFT1	TFIID	26.0263	1119	-0.311088	-0.247042	-0.167799	-1.20762	-1.3134	-1.1076	-1.38804	-1.71273	-1.75197	-1.77663
YLL039C	UBI4	CR	25.9944	1120	0.0756398	-0.859919	-1.1558	-1.80615	-1.52607	-1.40275	-0.714015	-1.02017	-1.25081	-0.970731
YER094C	PUP3	TFIID	25.959	1121	-0.102031	0.0304753	-0.23539	-1.33331	-1.53244	-1.06982	-2.13766	-1.93964	-1.89944	-1.91573
YDL065C	PEX19	TFIID	25.9568	1122	-0.0727937	0.391963	0.270914	-1.14372	-0.632921	0.0144627	-1.85036	-1.52923	-1.70865	-1.85152
YOR141C	ARP8	TFIID	25.956	1123	-0.034424	0.110041	0.126579	-1.39207	-0.808577	-0.299322	-2.0471	-1.81356	-2.13206	-1.78775
YLL027W	ISA1	CR	25.9212	1124	0.0690459	0.365007	0.0618006	-1.66132	-1.28998	-1.21899	-0.116545	-0.940067	-1.01365	-1.56106
YER120W	SCS2	TFIID	25.8843	1125	-0.152043	0.0558624	-0.193598	-1.89194	-1.67958	-1.30537	-2.44168	-1.77969	-1.79758	-1.66337
YOR045W	TOM6	TFIID	25.8765	1126	-0.233035	0.0416803	0.20447	-1.41468	-1.0851	-0.291703	-2.65132	-2.33934	-1.33325	-2.16055
YBR046C	ZTA1	CR	25.864	1127	0.00814386	-0.841912	-0.667306	-0.606786	-1.49756	-1.59838	-1.41967	-0.966783	-0.782617	-1.3247
YKR068C	BET3	TFIID	25.8597	1128	-0.0843419	0.0987019	0.169585	-1.21018	-1.06751	-0.610993	-2.18613	-1.92004	-1.5796	-2.06759
YDL155W	CLB3	TFIID	25.8378	1129	-0.107779	0.0436324	0.01159	-1.75153	-1.14705	-0.730709	-2.25553	-2.09188	-2.12113	-2.16417
YOR116C	RPO31	TFIID	25.8217	1130	-0.120446	0.206098	0.0720005	-1.41	-1.21348	-0.810149	-2.57669	-2.27294	-2.23637	-2.12738
YJL166W	QCR8	TFIID	25.8102	1131	-0.0654961	0.143029	-0.505447	-1.29133	-0.67008	-0.401862	-2.0054	-1.59959	-1.14588	-1.4943
YDL106C	PHO2	TFIID	25.8089	1132	-0.105341	0.234141	0.32144	-2.05674	-1.08103	-0.410561	-1.50061	-1.52207	-1.76211	-1.82511
YER151C	UBP3	TFIID	25.8009	1133	-0.0858819	-0.0240076	-0.072976	-1.99967	-1.46561	-0.966411	-2.4198	-1.97047	-2.18759	-1.99643
YDR525W-A	SNA2	TFIID	25.7999	1134	-0.210951	-0.209944	-0.221755	-0.811255	-0.644071	-0.454055	-2.85538	-2.58704	-2.39851	-3.05311
YBR164C	ARL1	TFIID	25.7208	1135	-0.157922	0.116407	0.102051	-1.32866	-0.672319	-0.235135	-2.11581	-1.82339	-1.8091	-1.92251
YDR129C	SAC6	TFIID	25.6458	1136	0.0165365	-0.180345	-0.221002	-2.21723	-1.40546	-1.01886	-2.32063	-1.75414	-1.84156	-1.80053
YDL190C	UFD2	TFIID	25.6428	1137	-0.0173037	0.226794	0.0445283	-1.46651	-0.618598	-0.133877	-1.76011	-1.81515	-1.57529	-1.61177
YDR449C	UTP6	TFIID	25.6424	1138	-0.0968525	0.319969	0.373288	-0.7216	-1.02241	-0.664253	-1.73443	-1.78822	-1.85546	-2.02179
YMR091C	NPL6	TFIID	25.6284	1139	-0.0656783	0.243133	0.219764	-1.53857	-0.954634	-0.490241	-2.20058	-1.7212	-1.82741	-1.98257
YDR356W	SPC110	TFIID	25.5974	1140	-0.149365	-0.128353	0.0318018	-2.30739	-1.06904	-0.315271	-2.22469	-1.81052	-2.17903	-1.98833
YDR266C	HEL2	TFIID	25.5845	1141	-0.0128257	0.208907	0.124305	-1.5007	-1.24585	-0.72566	-2.28529	-1.94758	-1.9942	-1.94817
YEL055C	POL5	TFIID	25.5759	1142	-0.0266519	0.194365	-0.0470845	-1.40274	-1.36319	-0.775551	-3.01931	-2.57236	-2.48307	-2.24354
YGL120C	PRP43	TFIID	25.5707	1143	-0.116183	0.123531	0.0301759	-1.21954	-1.80904	-1.13399	-2.54785	-2.32372	-2.226	-1.8899
YMR014W	BUD22	TFIID	25.5591	1144	-0.115687	0.345144	0.462806	-0.925533	-1.15391	-0.750103	-2.43712	-2.44465	-2.32184	-2.50279
YKR043C	SHB17	TFIID	25.5436	1145	-0.146876	0.318268	0.104449	-0.641331	-0.968703	-0.767059	-2.40647	-1.86373	-1.62681	-1.77334
YDR292C	SRP101	TFIID	25.5417	1146	-0.0678675	0.240902	0.0469627	-1.5405	-0.806244	-0.509388	-2.31602	-2.21252	-2.24704	-2.06009
YDR165W	TRM82	TFIID	25.4779	1147	-0.234909	0.130187	0.0675359	-0.670283	-1.2927	-1.03381	-2.7788	-2.29445	-2.2301	-2.15669
YLR027C	AAT2	CR	25.4732	1148	-0.210753	0.114963	-0.167081	-1.29675	-1.63287	-1.17921	-0.810462	-1.29735	-1.1267	-1.23672
YDR188W	CCT6	TFIID	25.4597	1149	0.0419925	0.0907364	-0.343118	-1.50492	-1.66059	-1.10956	-2.6522	-2.23193	-2.38482	-2.37109
YLR335W	NUP2	TFIID	25.4555	1150	-0.100208	0.131194	-0.0156282	-1.58808	-1.39762	-0.926383	-2.90272	-2.51333	-2.66734	-2.42402
YNL243W	SLA2	TFIID	25.4089	1151	-0.0800152	-0.14567	-0.143626	-1.41795	-1.24076	-0.746243	-2.33308	-1.99529	-1.96006	-1.90063
YOR195W	SLK19	TFIID	25.4048	1152	-0.129991	-0.00979852	0.199253	-1.66734	-1.01099	-0.415597	-1.81842	-1.64682	-1.80705	-1.7011
YBR198C	TAF5	TFIID	25.396	1153	-0.021962	0.239402	0.194364	-1.55864	-0.885424	-0.440066	-1.84537	-1.83644	-1.82063	-1.81789
YJL144W	YJL144W	CR	25.3788	1154	0.00522313	-0.379288	-0.666084	-3.92425	-2.57105	-2.57008	-2.15712	-1.53935	-2.05683	-1.67453
YNL267W	PIK1	TFIID	25.3696	1155	-0.0451343	0.0628617	0.00598206	-1.72443	-1.14185	-0.533835	-2.18973	-1.96873	-2.17213	-1.89448
YPR086W	SUA7	TFIID	25.3408	1156	0.0160279	0.10902	0.187555	-0.896943	-1.13209	-0.732881	-1.45135	-1.52192	-1.45177	-1.56342
YLL011W	SOF1	TFIID	25.3116	1157	-0.115403	0.365945	0.339769	-1.024	-1.30821	-1.01458	-2.19843	-2.10943	-2.06907	-1.95819
YPR167C	MET16	TFIID	25.3087	1158	-0.0300432	-0.309063	-0.390547	1.04438	-0.340635	-0.20977	-0.147665	-1.7581	-1.21726	-1.28758
YLR083C	EMP70	TFIID	25.2949	1159	0.0062384	0.201392	-0.167736	-1.44043	-1.29484	-0.904581	-2.46236	-2.32843	-2.11761	-1.99543
YNL169C	PSD1	CR	25.2861	1160	-0.207164	-0.596917	-0.232656	-4.20578	-2.80534	-2.07285	-1.57602	-2.12314	-1.84535	-1.89069
YPL129W	TAF14	TFIID	25.2812	1161	-0.121722	0.208099	0.302695	-1.35889	-0.939827	-0.463918	-1.92112	-1.68134	-1.69393	-1.67931
YGR089W	NNF2	TFIID	25.2611	1162	0.003901	0.0986666	0.202907	-1.85232	-0.898312	-0.447224	-1.58241	-1.60374	-1.90547	-1.78574
YOR281C	PLP2	TFIID	25.2546	1163	-0.204443	0.104373	0.035037	-1.39841	-1.3153	-0.694358	-2.50753	-2.35888	-2.46379	-2.29775
YOL061W	PRS5	TFIID	25.2494	1164	-0.131376	0.0903184	0.0380564	-1.28118	-1.30211	-0.909719	-2.66601	-2.14139	-2.12701	-2.1984
YGR026W	YGR026W	TFIID	25.2352	1165	-0.166139	-0.0802397	-0.234879	-2.1467	-1.45314	-0.85901	-2.39519	-2.1034	-2.0079	-2.10629
YMR197C	VTI1	TFIID	25.2222	1166	-0.230749	0.0994226	0.18226	-1.84085	-0.77858	-0.282626	-1.74576	-1.62483	-1.92476	-1.56945
YGR061C	ADE6	TFIID	25.217	1167	-0.0678372	-0.202077	-0.372079	-1.18273	-1.28572	-1.00357	-2.47545	-2.19415	-2.12154	-1.67439
YOR061W	CKA2	TFIID	25.2103	1168	-0.049862	0.160609	-0.0937306	-1.27388	-1.18631	-0.95302	-2.47323	-1.93302	-2.13265	-1.97085
YML018C	YML018C	TFIID	25.2081	1169	-0.012688	0.00867713	-0.303256	-0.355845	-1.03029	-0.934125	-2.05369	-2.77186	-2.24377	-2.27057
YNR061C	YNR061C	TFIID	25.1891	1170	-0.0827518	-0.0452734	-0.211302	-1.50867	-1.45598	-1.19164	-2.69952	-2.4452	-2.05582	-2.09646
YLR436C	ECM30	TFIID	25.1713	1171	0.0977434	-0.039097	-0.196178	-2.3602	-1.13331	-0.668247	-2.42373	-2.27894	-2.46528	-2.36234
YDR186C	YDR186C	TFIID	25.1496	1172	-0.0754326	0.0795532	0.012489	-1.0964	-0.873404	-0.467793	-1.58874	-1.42468	-1.58549	-1.45843
YNL059C	ARP5	TFIID	25.1492	1173	-0.154186	0.0760748	0.207019	-1.5882	-0.924307	-0.325575	-2.01919	-1.62445	-1.84214	-1.70556
YGL115W	SNF4	TFIID	25.1472	1174	-0.118532	0.176978	0.0856312	-2.12099	-1.47146	-1.25415	-2.11801	-1.62002	-1.45351	-1.55246
YCL035C	GRX1	TFIID	25.1434	1175	-0.190187	0.123808	0.117349	-1.91715	-1.41465	-0.443405	-1.63261	-1.55815	-1.03951	-1.26564
YNL103W	MET4	TFIID	25.1199	1176	-0.0537077	0.10444	0.283874	-0.890687	-0.850791	-0.551109	-1.94549	-2.08943	-2.27554	-1.92678
YBR247C	ENP1	TFIID	25.1196	1177	-0.159617	0.373529	0.279487	-0.760369	-1.30977	-0.826273	-2.9542	-2.4717	-2.53793	-2.42261
YDL224C	WHI4	TFIID	25.1164	1178	0.0254037	0.129302	-0.0211009	-1.87766	-1.14789	-0.64851	-1.60668	-1.74455	-1.71614	-1.63595
YPL009C	RQC2	TFIID	25.109	1179	-0.0238809	0.112103	0.0108206	-1.76654	-1.18304	-0.57191	-2.31838	-1.96727	-2.18588	-1.97429
YNL032W	SIW14	TFIID	25.1033	1180	-0.0401685	0.0838986	0.0615727	-1.22483	-0.931165	-0.464108	-2.6945	-2.45177	-2.25016	-1.92185
YDR101C	ARX1	TFIID	25.1028	1181	-0.146775	0.30793	0.14546	-0.719431	-1.66081	-1.30306	-2.55509	-2.49971	-2.22032	-1.95362
YER019C-A	SBH2	TFIID	25.1003	1182	-0.0647933	0.185038	0.117488	-1.31809	-1.35464	-0.732915	-2.15791	-1.96412	-1.8905	-1.99575
YLR384C	IKI3	TFIID	25.0936	1183	-0.0854591	0.288916	0.134961	-1.49314	-1.17489	-0.671697	-2.18757	-1.98933	-2.13893	-1.76297
YJR005W	APL1	TFIID	25.0898	1184	0.0790401	0.142246	0.133942	-1.49935	-0.903444	-0.546142	-1.60498	-1.51014	-1.61942	-1.51255
YOR147W	MDM32	TFIID	25.0788	1185	-0.0365019	0.223793	0.129025	-1.64711	-0.74546	-0.357651	-1.75512	-1.72655	-1.76057	-1.65794
YPR113W	PIS1	CR	25.055	1186	-0.21197	-0.314387	-0.351011	-1.92247	-1.53919	-0.991584	-1.77843	-1.35723	-0.962655	-1.13612
YAR002C-A	ERP1	TFIID	25.0334	1187	-0.067992	0.144417	-0.195191	-1.64872	-0.990382	-0.606184	-2.21769	-1.8699	-1.75481	-1.72432
YIL052C	RPL34B	TFIID	25.0159	1188	-0.284627	0.027217	-0.166531	-0.832981	-1.52376	-1.19631	-2.59643	-1.51159	-1.37198	-1.3007
YOR098C	NUP1	TFIID	25.0104	1189	-0.0488932	0.214646	0.135335	-1.401	-1.38628	-0.847089	-2.1148	-1.93522	-1.90533	-1.89777
YGL080W	MPC1	TFIID	24.9971	1190	0.00133934	0.200313	0.144227	-1.1436	-0.79931	-0.408507	-2.17031	-2.46059	-1.89227	-2.88337
YHL001W	RPL14B	TFIID	24.976	1191	-0.0543107	-0.0352392	-0.243038	-1.10471	-1.44005	-1.0941	-2.29533	-2.12312	-1.76235	-1.81278
YLL010C	PSR1	TFIID	24.9683	1192	0.0539762	0.0880377	0.114762	-1.59311	-1.26051	-0.705767	-2.05627	-1.79816	-2.03496	-1.87346
YER048C	CAJ1	TFIID	24.9513	1193	-0.0620947	0.117296	-0.0886201	-2.02485	-1.36472	-0.816637	-2.75495	-2.09125	-2.38886	-1.91513
YDR257C	RKM4	TFIID	24.946	1194	-0.0104062	0.166334	0.308759	-1.21256	-0.890631	-0.577015	-2.55286	-2.21343	-2.40457	-2.0754
YGR078C	PAC10	TFIID	24.9414	1195	-0.229862	0.00167033	-0.0583351	-1.15408	-1.35093	-1.123	-2.45545	-1.82697	-2.02864	-1.84849
YHR108W	GGA2	TFIID	24.9267	1196	-0.119072	0.0141377	-0.102638	-1.88304	-1.52711	-0.972306	-2.1933	-2.00929	-2.12905	-1.85846
YCR077C	PAT1	TFIID	24.9134	1197	-0.0231127	0.0733046	-0.0354272	-1.64127	-1.29801	-0.808049	-2.13619	-1.82241	-2.1507	-1.91786
YEL063C	CAN1	TFIID	24.9115	1198	0.0832294	0.323289	0.14842	-1.01921	-1.00573	-0.805725	-0.929072	-1.81969	-1.56425	-1.65155
YML004C	GLO1	TFIID	24.9036	1199	0.0174793	-0.00100016	-0.205685	-1.60117	-0.923288	-0.502569	-1.90906	-2.49527	-2.1415	-1.63787
YPR163C	TIF3	TFIID	24.8803	1200	-0.0521768	0.185008	0.0314394	-1.20005	-1.64413	-1.08056	-2.28728	-1.74763	-1.93326	-1.74727
YGR134W	CAF130	TFIID	24.8803	1201	0.0146406	-0.219314	-0.0615942	-1.39475	-1.23455	-0.916984	-1.15912	-1.41156	-1.3722	-1.5561
YJR060W	CBF1	TFIID	24.8686	1202	-0.217657	0.0620496	0.0859564	-2.39169	-1.83711	-1.28308	-2.55878	-2.28723	-2.61743	-2.20319
YBL039C	URA7	TFIID	24.8674	1203	-0.155816	0.107886	-0.154132	-0.777979	-1.76379	-1.25594	-2.88557	-2.46208	-2.36685	-2.05595
YBR181C	RPS6B	TFIID	24.8364	1204	-0.0871331	0.00264589	-0.366735	-1.14445	-1.48589	-0.909562	-2.96959	-1.87838	-1.80726	-1.53216
YNL155W	CUZ1	TFIID	24.8326	1205	0.0743236	-0.355158	-0.548667	-2.14991	-1.75488	-1.40854	-1.93426	-2.41013	-2.23027	-2.27702
YHL003C	LAG1	TFIID	24.8282	1206	-0.112482	-0.031254	-0.278821	-1.78293	-1.35103	-1.10645	-2.63938	-2.32016	-2.01239	-2.22504
YIL021W	RPB3	TFIID	24.7938	1207	-0.0549156	0.177288	0.00878925	-1.69627	-1.64391	-1.06862	-2.24002	-1.97329	-2.00834	-1.93172
YFR039C	OSW7	TFIID	24.792	1208	-0.0746819	-0.250501	-0.161611	-1.538	-1.07067	-0.700529	-2.4596	-2.31212	-2.1724	-2.1787
YKL088W	CAB3	TFIID	24.7759	1209	-0.00735695	0.0890567	0.172015	-1.68372	-1.09744	-0.518771	-2.0174	-1.71247	-1.87223	-1.75557
YDL058W	USO1	TFIID	24.771	1210	-0.0533403	0.246097	0.281627	-1.55312	-0.768188	-0.2731	-2.21013	-1.98588	-2.47977	-2.00082
YJL154C	VPS35	TFIID	24.7289	1211	-0.0326333	-0.0646445	-0.125295	-1.8056	-1.18303	-0.853878	-2.08726	-2.13849	-2.21237	-1.82618
YGR186W	TFG1	TFIID	24.719	1212	-0.144177	0.125878	0.213727	-1.48114	-1.31599	-0.623035	-2.00067	-1.72273	-1.85811	-1.76818
YJL041W	NSP1	TFIID	24.6915	1213	-0.103541	0.18399	0.0599416	-1.77164	-1.21642	-0.765797	-2.38925	-1.91607	-2.34761	-2.00975
YKR082W	NUP133	TFIID	24.6877	1214	-0.0237996	-0.0411618	-0.14734	-1.4727	-1.39091	-0.975981	-2.06404	-1.84339	-1.88033	-1.69988
YDR176W	NGG1	TFIID	24.6588	1215	-0.0896631	0.114644	0.174342	-1.94926	-1.06799	-0.474191	-2.34366	-2.05765	-2.43546	-2.12733
YCR008W	SAT4	TFIID	24.6477	1216	0.119928	0.122596	-0.210657	-1.60524	-1.57032	-0.917222	-2.23082	-1.96468	-2.00185	-2.10151
YOR327C	SNC2	TFIID	24.5969	1217	-0.376474	-0.806944	-0.60893	-1.52418	-2.48321	-1.47097	-3.07645	-2.99749	-2.30483	-2.73704
YCR106W	RDS1	TFIID	24.5866	1218	0.0829277	-0.177366	-0.245279	-2.24754	-0.903402	-0.658621	-2.11703	-2.24578	-2.09259	-2.16153
YMR054W	STV1	TFIID	24.5788	1219	-0.142858	0.00726688	-0.0506852	-1.68407	-1.19213	-0.713346	-2.66191	-2.23761	-2.25236	-2.07265
YOR342C	YOR342C	TFIID	24.5739	1220	-0.0930461	-0.291766	-0.301176	-1.8315	-2.68763	-2.06819	-2.87818	-2.38083	-2.58409	-2.22011
YLR190W	MMR1	TFIID	24.5635	1221	-0.0417629	-0.102269	-0.252886	-2.12756	-1.48029	-0.872087	-2.84807	-2.00179	-2.29272	-2.19348
YHR065C	RRP3	TFIID	24.5455	1222	-0.0548186	0.126908	0.139412	-1.25968	-1.46489	-0.72079	-2.40362	-2.06956	-1.87262	-1.98441
YAR002W	NUP60	TFIID	24.518	1223	-0.0420579	0.0286068	0.069397	-1.51141	-1.1653	-0.996621	-2.11624	-2.06996	-2.11121	-2.0813
YLR008C	PAM18	TFIID	24.5032	1224	-0.229194	0.179504	-0.240905	-1.13581	-1.50418	-1.1984	-2.41937	-2.22123	-2.02325	-2.20542
YJL171C	YJL171C	CR	24.4816	1225	0	-0.298115	-0.122333	-2.06093	-1.28551	-0.963987	-0.837546	-1.35211	-0.911459	-1.08777
YDR351W	SBE2	TFIID	24.4762	1226	0.0295132	-0.0119698	0.134031	-1.22672	-1.14847	-0.79174	-1.39115	-1.76786	-1.93919	-1.52148
YPL228W	CET1	TFIID	24.4728	1227	-0.0706222	0.167827	0.203486	-1.9765	-0.985876	-0.557826	-2.13152	-1.93719	-2.02462	-2.13447
YGR145W	ENP2	TFIID	24.4575	1228	-0.326544	0.367836	0.487833	-0.965952	-1.4749	-0.921813	-3.03022	-2.71846	-2.65397	-2.23967
YMR062C	ARG7	TFIID	24.4554	1229	0.0168967	0.674315	0.345371	0.158428	0.0262581	0.0144168	-1.17609	-0.816855	-0.427845	-1.00627
YDR003W	RCR2	TFIID	24.4356	1230	0.111614	-0.272908	-0.266314	-1.44093	-1.6679	-1.5884	-1.56332	-1.81979	-1.44524	-1.9898
YDR519W	FPR2	TFIID	24.3958	1231	-0.101024	-0.0425829	-0.0597719	-1.04903	-0.742773	-0.488936	-3.14889	-2.67272	-2.32451	-2.07623
YHR099W	TRA1	TFIID	24.3901	1232	0.00577949	0.137407	0.0977661	-1.67667	-1.1	-0.639274	-1.99051	-1.74093	-1.90767	-1.56784
YKL065C	YET1	TFIID	24.3896	1233	-0.125343	-0.110764	-0.313106	-1.79261	-1.27068	-0.963596	-2.14948	-1.90926	-2.02065	-1.86302
YKL094W	YJU3	TFIID	24.3763	1234	0.0431107	0.113613	-0.133203	-1.66079	-1.41709	-0.92857	-2.23283	-2.2513	-2.0287	-1.94423
YGR033C	TIM21	TFIID	24.372	1235	0.0768386	0.152854	0.0197065	-1.22718	-1.28176	-0.809405	-2.40515	-2.41968	-2.4861	-2.12026
YMR100W	MUB1	TFIID	24.3469	1236	0.191083	0.0325794	-0.143566	-1.39885	-0.98802	-0.649946	-1.55607	-1.9713	-1.99218	-1.65446
YHR199C	AIM46	CR	24.3226	1237	-0.102809	-0.380729	-0.668827	-1.06483	-1.60935	-1.261	-0.702849	-1.10427	-0.574275	-0.971053
YKL020C	SPT23	TFIID	24.2879	1238	0.0168546	0.157125	0.12968	-1.71773	-0.967171	-0.48215	-1.61283	-1.72053	-1.84277	-1.69361
YIL022W	TIM44	TFIID	24.2872	1239	0.0501427	0.251011	-0.0236629	-1.29486	-1.32827	-0.852495	-2.06746	-2.00841	-1.89496	-2.10621
YJL143W	TIM17	TFIID	24.2786	1240	-0.266192	0.213367	0.0932097	-1.22072	-0.749922	-0.210646	-2.30921	-2.30653	-1.84353	-1.76707
YLR409C	UTP21	TFIID	24.2693	1241	-0.112523	0.168991	-0.0193452	-1.43656	-1.61874	-1.11745	-2.53782	-2.22026	-2.2686	-1.93882
YJL117W	PHO86	TFIID	24.258	1242	-0.159362	-0.0638191	-0.0107581	-1.90961	-1.47006	-1.27509	-2.49921	-1.85052	-1.86305	-1.90477
YPL094C	SEC62	TFIID	24.2494	1243	-0.085978	-0.0207292	-0.0233813	-1.16115	-1.34979	-0.808054	-2.56899	-2.2261	-1.78003	-1.68462
YGL014W	PUF4	TFIID	24.2481	1244	0.00379854	0.122713	0.0385876	-1.50973	-1.21957	-0.638384	-2.14344	-1.82082	-1.9594	-1.86634
YHR111W	UBA4	TFIID	24.2435	1245	-0.127933	-0.15066	0.0163493	-1.17256	-1.06885	-0.764841	-2.7489	-2.32118	-2.44534	-2.11463
YGR040W	KSS1	CR	24.2171	1246	0.095268	-0.238152	-0.535518	-1.485	-1.92112	-1.56634	-1.81444	-1.02413	-1.1394	-1.36648
YIL115C	NUP159	TFIID	24.1851	1247	-0.0982179	0.182943	0.147714	-1.76588	-1.07162	-0.612134	-1.90274	-1.87935	-2.1025	-1.70879
YPL013C	MRPS16	TFIID	24.1689	1248	-0.0913632	0.0227382	-0.192539	-1.65434	-1.36727	-0.730788	-2.40247	-2.53516	-1.44061	-2.01896
YJL050W	MTR4	TFIID	24.1545	1249	-0.131546	0.197616	0.126072	-1.0128	-1.52425	-0.944572	-2.64739	-2.29522	-2.19431	-1.78671
YLR395C	COX8	TFIID	24.1342	1250	-0.211875	0.131894	-0.24614	-1.95625	-1.43057	-0.723885	-2.32878	-2.23516	-1.72069	-1.83497
YJL145W	SFH5	TFIID	24.1293	1251	-0.153902	-0.478187	-0.240295	-1.15765	-1.46387	-1.11909	-3.25022	-2.57249	-2.76905	-2.17577
YLR056W	ERG3	CR	24.0953	1252	-0.60238	-1.15173	-1.66955	-1.64109	-2.07777	-1.48633	-1.28023	-0.928058	-0.751343	-1.1362
YJR016C	ILV3	CR	24.0933	1253	-0.167869	0.174699	-0.338577	-0.947059	-1.60416	-1.24868	-1.29091	-0.942622	-0.970682	-0.691205
YNL149C	PGA2	TFIID	24.0906	1254	-0.0874153	-0.106314	0.00822303	-1.35349	-1.53825	-0.739816	-2.50672	-2.1106	-2.09631	-1.52166
YGR198W	YPP1	TFIID	24.0819	1255	0.101895	-0.295007	-0.195116	-1.40695	-1.21358	-0.868076	-2.29432	-2.27667	-2.34677	-2.32757
YLR295C	ATP14	TFIID	24.0775	1256	-0.184176	0.187173	-0.171359	-1.27997	-1.30545	-0.710094	-2.06781	-1.45302	-1.6049	-2.04707
YOR207C	RET1	TFIID	24.077	1257	-0.0447076	0.207906	0.258422	-1.21109	-1.21102	-0.730469	-2.18341	-2.08074	-2.00351	-1.71327
YJL212C	OPT1	CR	24.0738	1258	0.189558	-0.584628	-0.705642	-1.02453	-2.59728	-2.07693	-1.04461	-1.0442	-0.844491	-1.29197
YPL259C	APM1	TFIID	24.0732	1259	-0.0540723	0.0323642	-0.00726276	-2.00227	-1.24756	-0.817158	-1.7749	-1.75719	-2.06707	-2.03353
YDR083W	RRP8	TFIID	24.073	1260	-0.136351	0.404671	0.47308	-0.976438	-0.979829	-0.425139	-2.77083	-2.39881	-2.32807	-2.20954
YLR058C	SHM2	TFIID	24.0614	1261	-0.102498	-0.57011	-0.883632	-1.36022	-1.23065	-1.01882	-1.4105	-1.83723	-1.67501	-1.70568
YKL205W	LOS1	TFIID	24.0338	1262	0.0274755	0.0807644	0.143536	-1.33314	-1.21344	-0.970028	-1.67764	-1.67322	-1.9291	-1.68338
YLR398C	SKI2	TFIID	24.0233	1263	0.077767	0.21915	0.113552	-1.38008	-0.794164	-0.368127	-1.84832	-1.95063	-2.006	-1.78598
YPR159W	KRE6	TFIID	24.0082	1264	-0.0705857	-0.237422	-0.330368	-1.11975	-1.82476	-1.28523	-2.37427	-1.96986	-1.82856	-1.77091
YLR359W	ADE13	TFIID	24.0069	1265	-0.160844	0.0350566	-0.211295	-1.62262	-1.21651	-0.79563	-2.39582	-1.9135	-1.85631	-1.68483
YLR344W	RPL26A	TFIID	24.0043	1266	-0.0880328	0.0977338	-0.329067	-1.24987	-1.50788	-1.20009	-2.70643	-1.98462	-1.64859	-1.50656
YJR046W	TAH11	TFIID	24.0005	1267	0.00412789	0.127276	-0.0920739	-1.67273	-1.48384	-1.17023	-3.46805	-3.07637	-2.97165	-2.90368
YCR057C	PWP2	TFIID	23.9983	1268	-0.124908	0.197868	0.0878393	-0.757447	-1.59665	-1.13231	-2.48675	-2.1576	-2.266	-2.02488
YGL150C	INO80	TFIID	23.9711	1269	0.0735147	0.186607	-0.039163	-1.83152	-1.21895	-0.618789	-2.98364	-2.57718	-2.66978	-2.4679
YBL036C	YBL036C	TFIID	23.9563	1270	-0.192237	0.238881	0.164184	-1.2684	-0.888675	-0.524179	-2.4954	-2.05591	-1.60576	-1.60902
YMR243C	ZRC1	TFIID	23.9517	1271	-0.122214	-0.0336602	-0.352951	-1.10111	-1.48817	-1.02426	-2.64629	-2.82048	-2.52871	-2.44741
YHR103W	SBE22	TFIID	23.9361	1272	0.0147956	-0.00654247	-0.260085	-2.12892	-1.51841	-1.06092	-2.32839	-1.77911	-2.01899	-1.78402
YIL070C	MAM33	TFIID	23.9145	1273	-0.0490798	0.163148	0.0262662	-1.51628	-1.26225	-0.581659	-1.85572	-1.74024	-1.66095	-2.02165
YDR452W	PPN1	TFIID	23.8656	1274	-0.127055	0.0414425	0.00205094	-2.18416	-0.943123	-0.363089	-2.72759	-1.973	-2.01345	-1.97121
YDL047W	SIT4	TFIID	23.8652	1275	0.0245484	0.0750122	-0.136128	-1.61187	-1.66245	-1.28184	-2.59261	-2.59216	-2.3656	-2.28788
YDL040C	NAT1	TFIID	23.8324	1276	-0.0102155	0.136793	0.00661983	-1.5393	-0.927682	-0.530944	-2.55348	-2.17889	-2.24467	-1.86331
YMR089C	YTA12	TFIID	23.8125	1277	0.0878489	0.201975	0.10887	-1.71814	-1.00727	-0.470507	-2.35576	-2.10437	-2.30008	-2.06483
YDR055W	PST1	CR	23.8097	1278	-0.0266138	-0.945275	-1.08583	-2.95673	-2.91542	-2.65616	-0.0603343	-0.144256	-0.172639	-0.548156
YOL006C	TOP1	TFIID	23.7954	1279	-0.106586	-0.0502095	-0.0558706	-1.67365	-1.6399	-1.0177	-2.78042	-2.66999	-2.49168	-2.2671
YGR193C	PDX1	TFIID	23.7926	1280	-0.076066	0.000842861	0.00283713	-1.6307	-1.24341	-0.935345	-2.2775	-2.08664	-2.18728	-2.11185
YBR059C	AKL1	TFIID	23.7834	1281	-0.0158627	-0.0753572	-0.0836308	-2.21822	-0.873017	-0.529615	-2.21303	-1.99306	-2.23196	-2.06626
YNR043W	MVD1	TFIID	23.7533	1282	-0.171193	0.17871	-0.0636501	-1.08977	-0.563584	-0.0136348	-1.64154	-1.19689	-1.40527	-1.28796
YJR010W	MET3	TFIID	23.7467	1283	-0.170324	-0.325997	-1.22459	1.93187	-0.366217	-0.326114	0.0133858	-1.89953	-1.44228	-2.30055
YPL028W	ERG10	TFIID	23.7354	1284	0.0497488	0.0700713	-0.378356	-0.980349	-0.420248	-0.0751611	-2.13607	-1.82811	-1.63836	-1.63384
YJR041C	URB2	TFIID	23.7268	1285	-0.0114709	0.160191	0.264286	-1.25566	-1.09122	-0.551718	-2.02884	-2.10349	-2.27168	-1.89063
YDR385W	EFT2	TFIID	23.7106	1286	-0.0872144	-0.16663	-0.288902	-1.43743	-1.83107	-1.18952	-2.25289	-1.36551	-1.61172	-1.12639
YOR304W	ISW2	TFIID	23.691	1287	-0.053433	0.200765	0.173937	-1.46323	-0.877027	-0.518427	-3.2279	-2.27542	-2.50142	-2.05587
YDR045C	RPC11	TFIID	23.6694	1288	-0.350677	0.329063	0.187229	-0.6329	-1.06097	-0.598379	-2.78608	-2.3938	-2.10747	-2.30247
YOR216C	RUD3	TFIID	23.6671	1289	-0.122371	0.0653684	0.118152	-1.71758	-0.988869	-0.471309	-2.24893	-1.77273	-1.88636	-1.76989
YDR472W	TRS31	TFIID	23.647	1290	0.0478299	-0.333918	-0.520901	-1.91186	-1.6716	-0.999598	-2.27699	-1.71539	-1.44101	-2.18742
YJL004C	SYS1	TFIID	23.6404	1291	-0.156162	0.322855	0.158166	-1.31527	-0.703754	-0.523136	-2.17659	-2.24851	-1.50536	-1.81297
YDR463W	STP1	TFIID	23.6067	1292	-0.0450955	0.212833	0.124475	-1.49012	-0.651327	-0.31987	-1.73254	-1.96575	-2.35526	-1.8351
YDL111C	RRP42	TFIID	23.6051	1293	-0.0396216	0.130805	-0.164982	-1.35711	-1.15852	-0.824308	-2.47343	-2.43009	-2.13736	-2.35536
YKL068W	NUP100	TFIID	23.6011	1294	-0.0681804	0.114578	0.0742091	-0.70755	-1.14372	-0.799409	-2.19975	-2.13032	-2.27124	-1.84422
YGR178C	PBP1	TFIID	23.5912	1295	0.0806299	-0.0116622	-0.10688	-1.57702	-1.33276	-0.814465	-2.43322	-2.13842	-2.19688	-1.9261
YPL137C	GIP3	TFIID	23.5728	1296	0.0812788	-0.295393	-0.477508	-1.18926	-1.94175	-1.56658	-1.71066	-1.81964	-1.73382	-2.12447
YOR222W	ODC2	CR	23.5686	1297	0.119344	0.0974234	0.226309	-1.2567	-1.92638	-1.33892	-1.71023	-1.23606	-1.19576	-1.41099
YGR060W	ERG25	CR	23.5576	1298	-0.469167	-1.0964	-0.890326	-1.89379	-0.833796	-0.45954	-1.62493	-1.21421	-0.876118	-1.20347
YOR107W	RGS2	CR	23.5544	1299	0.28203	-0.979879	-0.962793	-2.57137	-2.38783	-2.60014	-0.0975288	-0.617158	-0.388649	-0.725613
YAR014C	BUD14	TFIID	23.5369	1300	-0.0518022	0.126978	0.0214412	-1.28089	-0.942889	-0.468659	-2.35106	-2.19305	-2.46364	-2.0855
YDR320C-A	DAD4	TFIID	23.5299	1301	-0.155055	-0.116917	0.0350175	-0.604088	-1.16878	-1.01824	-2.92451	-1.92009	-2.25825	-2.14098
YFR037C	RSC8	TFIID	23.4823	1302	-0.123407	0.202255	0.188183	-1.70171	-1.35262	-0.756616	-2.48712	-1.74631	-2.07232	-2.18351
YBR088C	POL30	CR	23.4586	1303	-0.554227	-0.91878	-0.822889	-2.10319	-1.78724	-1.53755	-1.10764	-1.02517	-0.552863	-1.30245
YHR206W	SKN7	TFIID	23.4066	1304	-0.0592317	0.243906	0.153754	-1.47452	-1.17241	-0.774509	-2.27473	-2.36196	-2.39372	-2.0916
YDR068W	DOS2	TFIID	23.3966	1305	-0.0858405	0.261126	0.225649	-1.48126	-0.658962	-0.120814	-2.46789	-1.97169	-2.0117	-1.93842
YCL059C	KRR1	TFIID	23.3417	1306	-0.256308	0.164662	0.121634	-1.01785	-1.40731	-0.896907	-2.96421	-2.31933	-2.25	-2.36481
YOR305W	RRG7	TFIID	23.3353	1307	-0.144799	0.165111	0.0737205	-1.20437	-1.03788	-0.493006	-1.98312	-1.46072	-1.43501	-1.53382
YJL128C	PBS2	TFIID	23.3186	1308	-0.0139822	0.0833233	0.0555241	-1.75158	-1.2011	-0.917127	-2.36268	-2.3215	-2.47879	-2.43392
YHR148W	IMP3	TFIID	23.3115	1309	-0.156675	0.332778	0.329295	-0.722762	-0.814261	-0.510992	-2.14939	-2.37903	-2.05341	-2.10918
YAL007C	ERP2	TFIID	23.3064	1310	-0.0511056	0.00792727	-0.279839	-1.70155	-1.00497	-0.782974	-2.25111	-2.03193	-1.97292	-1.49173
YGL184C	STR3	CR	23.2984	1311	-0.104012	-1.16191	-0.61944	0.265313	-1.56441	-1.75411	0.327639	-0.525508	-0.296593	-0.911171
YHR104W	GRE3	CR	23.2924	1312	0.0871191	-0.212532	-0.745897	-2.91014	-1.81808	-1.48617	-1.85417	-1.25416	-1.40458	-1.6861
YLR418C	CDC73	TFIID	23.2668	1313	-0.0688476	-0.0164123	0.0125514	-1.46089	-1.15133	-0.645551	-2.29665	-2.21748	-2.32798	-2.06829
YNL258C	DSL1	TFIID	23.2548	1314	-0.0585732	0.175506	0.103228	-1.75646	-0.906405	-0.551924	-2.29147	-1.98064	-2.17919	-1.94598
YPR089W	YPR089W	TFIID	23.25	1315	-0.0684566	0.151074	0.156194	-1.6521	-0.921763	-0.377627	-2.09478	-1.77894	-1.92106	-1.92499
YLL013C	PUF3	TFIID	23.2482	1316	-0.0126633	0.15558	0.059639	-1.64118	-1.25711	-0.601284	-2.10352	-2.17153	-2.28245	-1.94183
YOL051W	GAL11	TFIID	23.2235	1317	0.0367578	0.118233	0.0963468	-1.48633	-1.11741	-0.630297	-2.18122	-2.09249	-2.36463	-2.06562
YMR047C	NUP116	TFIID	23.215	1318	-0.0728948	0.120893	0.0482299	-1.65995	-1.18223	-0.727474	-1.87931	-1.77926	-1.93272	-1.70168
YDR298C	ATP5	TFIID	23.2114	1319	-0.322629	-0.0469513	-0.358191	-1.46041	-0.8356	-0.623918	-2.00878	-1.93359	-1.56975	-1.61225
YOL098C	YOL098C	TFIID	23.1979	1320	0.164405	0.174781	-0.0402319	-1.7206	-1.1404	-0.624185	-2.43623	-2.16713	-2.30997	-2.09271
YAL041W	CDC24	TFIID	23.1771	1321	-0.0804991	0.0792814	0.0659218	-1.55483	-1.06806	-0.679951	-2.04435	-1.81174	-2.09966	-1.91689
YOR243C	PUS7	TFIID	23.1682	1322	-0.0131354	0.338974	0.288253	-1.04835	-1.06002	-0.531218	-2.56775	-2.05501	-2.22039	-1.98189
YGR195W	SKI6	TFIID	23.1603	1323	-0.120968	0.136669	0.145876	-1.25346	-1.08134	-0.772594	-2.7019	-1.95932	-1.92076	-1.97466
YHL007C	STE20	TFIID	23.1491	1324	0.0477047	-0.111177	-0.241612	-1.4709	-1.76705	-1.27029	-2.33367	-2.22031	-2.3438	-2.08088
YLR248W	RCK2	TFIID	23.1424	1325	-0.104629	0.0437286	-0.177687	-1.58389	-1.27192	-0.834641	-2.59833	-2.4697	-2.51863	-2.17696
YKL101W	HSL1	CR	23.141	1326	-0.0382441	-0.421425	-0.473231	-2.22603	-1.85623	-1.16867	-1.61468	-1.37227	-1.40257	-1.31625
YOL126C	MDH2	CR	23.129	1327	-0.174063	-0.510989	-0.475562	-2.78811	-2.21795	-1.83696	-0.947879	-0.6954	-0.814213	-1.01794
YBR256C	RIB5	CR	23.1064	1328	0.0464017	-0.0958436	-0.0737175	0.151869	-0.667628	-0.9238	-1.39325	-0.92951	-0.633458	-1.17724
YGR280C	PXR1	TFIID	23.0846	1329	-0.199973	0.3594	0.419067	-0.994117	-1.60004	-0.821615	-2.90267	-2.40617	-2.80506	-2.48797
YFL008W	SMC1	TFIID	23.0686	1330	-0.12251	0.0775996	0.0694862	-2.05538	-1.35663	-0.682409	-2.2059	-1.98811	-2.26482	-2.15633
YBL026W	LSM2	TFIID	23.0482	1331	-0.112779	-0.184447	0.0371452	-1.34909	-1.19897	-0.628795	-2.53967	-1.87514	-1.97677	-2.34386
YPL271W	ATP15	TFIID	23.0469	1332	-0.0526823	-0.0852698	-0.248968	-1.49921	-0.372267	-0.161626	-2.68471	-1.6503	-1.87969	-2.17136
YLR314C	CDC3	TFIID	23.0348	1333	-0.124758	0.0376358	-0.011564	-1.70342	-1.26667	-0.673249	-2.21714	-1.8114	-2.08315	-1.90122
YOL119C	MCH4	CR	23.0335	1334	-0.0388356	-0.041899	-0.373457	-0.32509	-0.521981	-0.604602	-0.641986	-0.547105	-0.0808111	-0.896543
YMR319C	FET4	CR	23.0313	1335	-0.3901	-1.10646	-0.717254	-1.77211	-2.96992	-2.27698	-2.52308	-1.46913	-1.09329	-1.26389
YLR224W	YLR224W	TFIID	23.0293	1336	-0.0893891	0.2001	-0.000891805	-1.49137	-0.854134	-0.722196	-2.38939	-2.23898	-2.27539	-2.23678
YNL138W	SRV2	TFIID	23.0273	1337	-0.091782	0.0281473	-0.161259	-2.16661	-1.20116	-0.846512	-2.02266	-1.70508	-1.57064	-1.53597
YLR410W	VIP1	TFIID	23.0235	1338	-0.106755	0.234541	0.0666724	-1.72567	-1.33879	-0.801563	-1.75014	-1.78518	-1.76263	-1.35333
YDR227W	SIR4	TFIID	23.0229	1339	-0.0638121	-0.0653287	0.0500368	-1.77795	-1.03296	-0.535251	-2.39097	-2.34415	-2.42182	-2.16977
YGL101W	YGL101W	TFIID	23.0207	1340	-0.231812	0.149384	-0.0920863	-1.89462	-1.13899	-0.454187	-1.90356	-1.62275	-1.26568	-1.74457
YBR249C	ARO4	CR	22.9763	1341	0.0223209	0.509574	0.351168	0.0225497	-1.12049	-0.962305	-1.6716	-0.995885	-0.857716	-0.972448
YNR067C	DSE4	CR	22.967	1342	-0.0419276	-1.25539	-1.00821	-3.75518	-3.47733	-2.77273	-0.758777	-0.157262	-0.326661	-0.262051
YNL001W	DOM34	TFIID	22.9641	1343	-0.176969	-0.0100044	0.0152831	-1.10005	-1.44241	-0.883951	-2.50669	-2.25897	-2.10325	-2.15977
YDR006C	SOK1	TFIID	22.9419	1344	-0.00585432	-0.142977	-0.0237757	-0.991601	-1.33261	-0.938609	-2.0589	-2.31702	-2.32125	-2.27206
YBR287W	YBR287W	TFIID	22.9352	1345	-0.123399	-0.333951	-0.325057	-2.33406	-1.69375	-1.37493	-1.64073	-1.88291	-1.69189	-1.64212
YNL004W	HRB1	TFIID	22.9351	1346	-0.0121535	0.130248	0.104777	-0.998826	-0.993425	-0.381218	-2.30302	-1.89108	-2.10246	-2.10649
YKL190W	CNB1	TFIID	22.9245	1347	-0.050845	-0.0174193	0.00945891	-1.83125	-1.11754	-0.876887	-2.3377	-1.97981	-1.73038	-2.12193
YOR162C	YRR1	TFIID	22.9234	1348	0.429947	-0.418743	-0.48655	-1.4639	-1.23063	-0.79478	-2.03546	-2.06485	-2.13679	-1.95163
YOR212W	STE4	TFIID	22.9206	1349	-0.0235002	-0.0511092	-0.190113	-1.50357	-1.99498	-1.53071	-2.65777	-2.50503	-2.23109	-2.13787
YGR191W	HIP1	TFIID	22.9038	1350	0.0252046	-0.0259963	-0.20976	-0.639066	-1.40174	-1.04892	-2.75212	-2.5487	-2.40618	-2.45073
YER008C	SEC3	TFIID	22.9017	1351	0.0339589	0.132842	0.138877	-1.93133	-0.972111	-0.411194	-2.46365	-2.03237	-2.1747	-2.18453
YKL058W	TOA2	TFIID	22.8947	1352	-0.141618	0.257998	0.0835038	-1.17525	-0.655929	-0.355645	-2.52453	-2.36418	-1.58966	-2.09183
YGL246C	RAI1	TFIID	22.8765	1353	-0.144102	0.0140519	0.0670561	-1.05867	-1.32552	-0.780679	-2.51925	-2.06588	-1.94855	-2.01106
YNL132W	KRE33	TFIID	22.8736	1354	-0.0417631	0.216877	0.203717	-1.19729	-1.40823	-0.980646	-2.63761	-2.12626	-2.13212	-1.87827
YOR244W	ESA1	TFIID	22.8681	1355	-0.0391907	0.104972	0.27679	-1.48701	-0.782241	-0.241377	-1.65783	-1.69485	-1.731	-1.6148
YDR507C	GIN4	TFIID	22.8585	1356	-0.141007	-0.234403	-0.196237	-1.41677	-1.19995	-0.469493	-2.50442	-1.92353	-1.99518	-1.78297
YKL061W	BLI1	TFIID	22.8503	1357	-0.0492141	0.336337	0.523204	-1.14803	-0.523687	-0.148047	-4.13155	-2.21953	-2.0423	-2.05505
YJR003C	YJR003C	CR	22.8499	1358	-0.11121	0.248555	0.391174	-1.53949	-1.12945	-0.686846	-1.69559	-1.06091	-1.20598	-0.990672
YNL263C	YIF1	TFIID	22.8478	1359	-0.159664	0.0707391	0.0273651	-1.94237	-1.29715	-0.7142	-2.21607	-2.00954	-2.29855	-1.98315
YNL192W	CHS1	CR	22.8327	1360	-0.112453	-0.337587	-0.119118	-1.71452	-1.93543	-1.62815	-0.965367	-0.737762	-0.807103	-0.873759
YJL036W	SNX4	TFIID	22.8258	1361	0.011181	0.13433	-0.15485	-1.94485	-0.906992	-0.445448	-2.07298	-2.22305	-2.21372	-2.19328
YOL012C	HTZ1	TFIID	22.779	1362	-0.387109	-0.0941075	-0.276992	-2.25287	-1.89544	-1.26523	-2.59271	-1.69219	-1.73826	-1.75008
YNL297C	MON2	TFIID	22.7685	1363	0.00871145	0.11463	0.0911276	-1.75922	-0.788967	-0.363702	-1.97449	-1.8369	-1.88113	-1.64418
YDL063C	SYO1	TFIID	22.7677	1364	-0.329014	0.458445	0.61757	-0.430567	-1.14202	-0.927379	-2.01972	-2.12419	-2.0921	-1.9726
YBR036C	CSG2	TFIID	22.7577	1365	-0.0301179	0.122548	-0.0803304	-1.48353	-1.07879	-0.738571	-2.31184	-2.19507	-1.89178	-2.0699
YMR044W	IOC4	TFIID	22.7419	1366	-0.117612	0.188768	0.0623482	-2.10016	-1.15563	-0.556724	-2.80543	-2.58689	-2.73023	-2.40477
YDR500C	RPL37B	TFIID	22.7393	1367	-0.144475	-0.0745994	-0.339746	-0.975193	-1.30891	-0.960236	-2.16802	-1.81267	-1.4895	-0.998313
YOR354C	MSC6	TFIID	22.7364	1368	-0.0366155	0.217053	0.0884379	-1.64328	-0.90083	-0.413089	-1.70639	-1.70097	-1.73057	-1.5547
YKL004W	AUR1	TFIID	22.7248	1369	0.00106545	0.020866	-0.229313	-1.23637	-1.31824	-0.968867	-2.18363	-2.11116	-1.77954	-1.99148
YPL011C	TAF3	TFIID	22.724	1370	-0.020089	0.212505	0.118439	-1.32016	-0.752823	-0.425194	-1.85699	-1.61106	-1.73887	-1.84347
YJL010C	NOP9	TFIID	22.7132	1371	-0.184591	0.309616	0.215826	-1.34722	-1.18068	-0.672874	-3.05212	-2.64043	-2.64141	-2.29661
YDL212W	SHR3	TFIID	22.7116	1372	-0.351558	0.14205	-0.118648	-1.21541	-1.21855	-0.765902	-2.33327	-1.78888	-1.58993	-1.29031
YNL135C	FPR1	CR	22.6748	1373	-0.199192	0.100271	0.387242	-0.831	-0.383221	0.0433327	1.39922	1.4947	1.4161	0.685427
YNL130C	CPT1	CR	22.6637	1374	-0.17171	-0.322531	-0.267565	-2.58631	-2.18523	-1.94523	-0.51443	-1.85941	-1.52345	-1.67834
YOL021C	DIS3	TFIID	22.6407	1375	-0.0534339	0.135692	-0.0434299	-1.51288	-1.43542	-0.920794	-2.29845	-2.18512	-2.35374	-2.08063
YGL108C	YGL108C	TFIID	22.6357	1376	-0.0651287	0.155477	0.112818	-1.39977	-1.08741	-0.754436	-2.34483	-2.04673	-1.78675	-2.2937
YDR169C	STB3	TFIID	22.6165	1377	0.0111776	0.015955	-0.0558352	-2.12887	-1.05943	-0.67025	-2.21902	-1.89644	-2.30569	-1.79086
YNL313C	EMW1	TFIID	22.5927	1378	-0.107668	0.200849	0.0975442	-1.12988	-1.19813	-0.701126	-2.44561	-2.2169	-2.31317	-2.07182
YCR034W	ELO2	TFIID	22.5764	1379	-0.303204	-0.0928157	-0.176705	-1.9281	-1.77971	-1.23895	-2.36341	-2.2064	-1.84599	-2.04231
YML001W	YPT7	TFIID	22.574	1380	-0.392829	0.257552	-0.0814006	-1.26704	-0.687533	-0.481114	-2.22884	-2.36508	-2.309	-1.77576
YDL171C	GLT1	TFIID	22.5738	1381	0.0213628	0.25055	0.0456412	-1.03381	-0.771319	-0.526827	-1.23573	-1.56341	-1.55082	-1.25812
YLR003C	CMS1	TFIID	22.5733	1382	-0.230358	0.166909	0.144377	-0.90302	-1.36105	-0.718455	-2.35205	-2.16853	-2.37401	-2.26727
YER063W	THO1	TFIID	22.5697	1383	-0.200657	0.0335724	-0.189561	-1.66807	-1.13701	-0.736981	-3.78095	-3.18753	-3.2085	-2.92489
YKR063C	LAS1	TFIID	22.5526	1384	-0.0399571	0.0606824	0.0569736	-1.17464	-1.14781	-0.672232	-2.27077	-2.5386	-2.1703	-2.12965
YDL072C	YET3	TFIID	22.551	1385	-0.0824999	-0.298695	-0.376741	-1.76556	-1.45539	-0.977104	-2.12982	-1.86119	-1.77978	-1.72134
YKL176C	LST4	TFIID	22.5464	1386	-0.0475068	-0.0385617	0.109137	-1.34935	-1.00092	-0.585015	-1.87673	-1.77413	-1.69911	-1.68604
YIR033W	MGA2	TFIID	22.5312	1387	-0.116858	-0.269473	-0.136867	-1.48801	-0.697298	-0.25611	-2.5145	-1.90193	-1.90806	-1.67257
YKL185W	ASH1	CR	22.5187	1388	-0.0381351	-1.03538	-0.858998	-3.02588	-2.42131	-2.00826	-0.0837547	-0.266095	-0.514697	-0.483908
YKL044W	YKL044W	CR	22.5079	1389	-0.406987	-0.843221	-0.75112	-3.68186	-3.04229	-2.59657	-0.286213	0.0343277	0.270912	-0.511042
YDR005C	MAF1	TFIID	22.5016	1390	-0.150059	0.182732	0.0860052	-2.28585	-0.971185	-0.450636	-1.61681	-1.71549	-1.76755	-1.53884
YNL191W	DUG3	TFIID	22.4607	1391	-0.159354	-0.183269	-0.31137	-0.825957	-1.71283	-1.5008	-1.6031	-2.03884	-1.45697	-1.92298
YNR019W	ARE2	CR	22.4547	1392	0.0838853	-1.00895	-0.787887	-3.67316	-3.23074	-2.82172	-0.946125	-0.393077	-0.224115	-0.772593
YBL064C	PRX1	CR	22.4524	1393	0.0426503	-0.554128	-1.05642	-2.25103	-2.18256	-1.74473	-0.0267186	0.180297	0.453062	-0.553865
YNL041C	COG6	TFIID	22.4408	1394	-0.0711351	0.196623	0.139006	-1.55352	-0.638962	-0.289004	-1.91881	-1.89487	-1.95254	-1.92068
YKL143W	LTV1	TFIID	22.4338	1395	-0.206941	0.320167	0.270596	-0.595868	-1.40296	-0.807577	-2.64999	-2.28666	-2.27736	-2.17283
YLR071C	RGR1	TFIID	22.4292	1396	-0.073849	0.0988844	0.0727818	-1.62351	-0.989801	-0.482496	-1.83153	-1.91051	-1.97827	-1.68691
YLR026C	SED5	TFIID	22.4168	1397	-0.0297064	0.113985	0.122061	-1.71167	-1.23102	-0.610135	-1.95282	-1.69971	-2.43719	-1.89038
YNL272C	SEC2	TFIID	22.4085	1398	-0.0324818	0.108252	0.210518	-1.78401	-0.910641	-0.462126	-1.80014	-1.82502	-2.01548	-1.55133
YOR227W	HER1	CR	22.4062	1399	-0.0499962	0.153264	0.0257485	-0.84556	0.0603618	0.199791	-0.705598	0.115522	0.0553261	-0.0763141
YOR285W	RDL1	TFIID	22.398	1400	-0.122904	-0.057627	-0.432753	-1.06891	0.0984232	0.584733	-1.59392	-1.94586	-1.82147	-1.11867
YKL087C	CYT2	TFIID	22.3912	1401	0.133531	0.314335	0.0427344	-1.012	-1.2085	-1.04445	-1.41229	-1.57068	-1.28305	-1.74219
YBR122C	MRPL36	TFIID	22.3818	1402	0.00472813	0.173464	-0.145529	-1.54204	-1.36872	-0.846788	-2.27788	-1.99551	-1.82327	-2.02258
YJR042W	NUP85	TFIID	22.378	1403	-0.00782467	0.269571	0.248067	-1.51887	-1.09256	-0.711251	-1.61741	-1.60387	-1.67138	-1.36218
YCR003W	MRPL32	TFIID	22.3554	1404	-0.10885	0.154748	0.274299	-1.05315	-0.957438	-0.508752	-2.37446	-2.28467	-1.97581	-2.26152
YLR028C	ADE16	TFIID	22.355	1405	-0.113271	-0.0594799	-0.223295	-1.60717	-1.56517	-1.05036	-2.52805	-2.2864	-2.19149	-1.90819
YJL104W	PAM16	TFIID	22.3535	1406	-0.169962	0.119696	-0.185887	-1.44102	-1.6435	-0.823442	-2.64693	-2.10793	-1.91373	-2.46033
YDL226C	GCS1	TFIID	22.3482	1407	-0.158219	0.148025	0.161488	-1.56966	-1.28635	-0.708045	-2.26994	-1.81697	-2.12954	-2.09356
YOR372C	NDD1	TFIID	22.3418	1408	-0.00763131	-0.0737106	-0.0903896	-2.00992	-1.00121	-0.53471	-1.59969	-1.94632	-2.11378	-2.21975
YOL020W	TAT2	TFIID	22.3174	1409	-0.0552501	-0.224074	-0.367411	-0.824043	-1.4592	-1.22932	-2.90947	-2.66583	-2.3684	-2.37181
YDR210W	YDR210W	CR	22.3159	1410	-0.102749	-0.133734	-0.105355	-1.8996	-1.84132	-1.19395	-2.05525	-1.56334	-0.688799	-1.46588
YGR183C	QCR9	TFIID	22.3117	1411	-0.0109227	-0.00459924	-0.276517	-1.01735	-0.0421082	0.190159	-2.04053	-1.67818	-1.37198	-1.78159
YDR262W	YDR262W	TFIID	22.3075	1412	-0.0658906	0.0580192	0.0868213	-0.673936	-0.842058	-0.525007	-1.74275	-1.63916	-1.46474	-1.84258
YML086C	ALO1	TFIID	22.3058	1413	0.0356328	-0.258333	-0.454544	-1.30914	-1.7174	-1.2418	-2.58745	-2.18134	-1.97037	-1.9759
YIL041W	GVP36	TFIID	22.2919	1414	-0.17334	0.218826	0.089616	-1.53313	-1.15978	-0.75298	-1.97936	-1.64984	-1.92707	-1.59676
YGR245C	SDA1	TFIID	22.2879	1415	-0.10551	0.31878	0.371125	-0.856678	-1.38464	-1.06306	-2.66513	-2.59136	-2.6009	-2.10093
YNR038W	DBP6	TFIID	22.2813	1416	-0.076521	0.296886	0.295446	-1.02621	-1.00485	-0.648093	-2.26048	-2.22802	-2.25407	-1.97238
YER022W	SRB4	TFIID	22.276	1417	-0.0253741	0.175304	0.13875	-1.63841	-0.808613	-0.204466	-2.17422	-2.10121	-2.42727	-1.97151
YDL035C	GPR1	TFIID	22.2753	1418	0.0127495	0.104908	0.152139	-1.29264	-0.822793	-0.45784	-2.41741	-2.28052	-2.43741	-1.98999
YJR125C	ENT3	TFIID	22.2407	1419	-0.140964	0.214142	0.00906394	-1.77371	-1.07217	-0.497274	-1.89571	-1.62172	-1.60704	-1.77889
YCL030C	HIS4	CR	22.2324	1420	-0.0788326	0.26676	0.193	-0.562557	-1.05973	-0.958864	-0.538939	-0.449388	-0.516837	-0.884063
YLL021W	SPA2	TFIID	22.2142	1421	-0.056281	0.0380525	0.0998045	-1.84335	-1.11545	-0.524783	-2.31684	-1.93345	-2.1847	-1.86107
YOR159C	SME1	TFIID	22.2125	1422	-0.0922926	0.191363	-0.105109	-1.553	-1.20953	-0.680556	-2.46923	-1.93776	-1.87461	-2.17904
YPL059W	GRX5	TFIID	22.1977	1423	-0.0296963	0.0176745	-0.0438094	-0.913003	-0.908204	-0.475297	-2.40049	-1.98141	-2.00777	-1.93249
YLR052W	IES3	TFIID	22.1922	1424	-0.110971	0.198731	0.289372	-1.45097	-1.25766	-0.773691	-1.78821	-1.8285	-2.08198	-1.86291
YGL106W	MLC1	TFIID	22.151	1425	-0.208736	0.146158	-0.504522	-1.31866	-1.60433	-1.2385	-2.59347	-2.02354	-1.81042	-1.73035
YDR527W	RBA50	TFIID	22.1405	1426	-0.115559	0.0934685	0.132938	-0.742798	-1.43892	-1.17196	-3.07068	-2.99135	-2.83885	-2.47087
YIL112W	HOS4	TFIID	22.1383	1427	-0.0754497	0.166832	0.289474	-1.90166	-0.966631	-0.2671	-2.15924	-2.0402	-2.43339	-1.95683
YOR375C	GDH1	CR	22.1306	1428	0.0933854	0.217961	-0.686215	-0.986574	0.306106	0.320708	-0.381148	-0.0925751	-0.370688	-0.589153
YOR165W	SEY1	TFIID	22.1226	1429	-0.13217	0.00673165	0.00742823	-1.8014	-0.990692	-0.659037	-2.53587	-2.13743	-2.08919	-2.07571
YFL013C	IES1	TFIID	22.1206	1430	-0.00323953	0.232618	0.197103	-1.63852	-0.739131	-0.223197	-1.98221	-1.82257	-2.13338	-1.87208
YKL033W-A	YKL033W-A	TFIID	22.1081	1431	-0.0601656	0.184438	-0.122761	-1.06633	-0.662577	-0.638076	-2.8568	-2.24728	-1.8247	-1.71628
YNL221C	POP1	TFIID	22.1079	1432	-0.0327752	0.0894106	0.0339546	-0.738132	-1.08358	-0.833684	-2.19691	-2.22994	-2.14601	-2.04869
YEL003W	GIM4	TFIID	22.0975	1433	-0.190732	0.255275	0.369968	-1.19642	-0.873442	-0.233604	-2.12148	-2.25303	-1.9099	-1.96853
YOR142W	LSC1	CR	22.064	1434	0.0980489	0.0499096	-0.183836	-1.63202	-0.883205	-0.311394	-1.28397	-1.1471	-1.11227	-1.28933
YBR126C	TPS1	CR	22.0494	1435	0.125566	-0.10113	-0.521086	-2.86756	-1.00246	-0.686041	-0.740548	-0.483097	-0.545115	-1.33385
YNR031C	SSK2	TFIID	22.0486	1436	0.0280137	-0.0139188	-0.136396	-1.77893	-1.26011	-0.625263	-1.8276	-1.93437	-2.01193	-1.82724
YMR001C-A	YMR001C-A	CR	22.0483	1437	-0.690045	-0.260151	-0.202076	-2.21623	-1.61528	-1.5032	-1.07145	-1.55677	-1.72139	-1.07701
YMR291W	TDA1	CR	22.0395	1438	0.0297453	-0.847704	-0.351575	-2.66059	-1.97358	-2.03607	-0.646561	-0.536928	-0.615605	-1.09083
YMR093W	UTP15	TFIID	22.0231	1439	-0.049211	0.322614	0.258486	-0.900869	-1.34994	-0.991604	-2.22795	-2.16703	-2.13997	-1.87548
YJL192C	SOP4	TFIID	22.0213	1440	-0.23131	-0.0828387	-0.0266591	-1.29287	-1.0523	-0.492481	-2.32552	-2.00971	-1.88054	-1.79722
YMR212C	EFR3	TFIID	22	1441	-0.0494796	0.281585	0.154884	-1.59744	-1.09982	-0.636924	-2.37762	-2.15067	-2.31609	-1.74828
YPR097W	YPR097W	TFIID	21.9982	1442	0.0956598	0.0611211	-0.109139	-1.80905	-1.32913	-0.6936	-2.21384	-2.0105	-2.19002	-1.91103
YNL268W	LYP1	TFIID	21.9956	1443	0.0346544	-0.218473	-0.246383	-0.824907	-1.33562	-1.03002	-1.53543	-1.75186	-1.44406	-1.51956
YLR336C	SGD1	TFIID	21.9513	1444	-0.0519686	0.381431	0.39175	-0.759738	-0.626056	-0.160523	-1.95636	-2.14076	-1.9935	-1.81302
YGL233W	SEC15	TFIID	21.9438	1445	0.017868	0.209414	-0.0628258	-1.71697	-0.853568	-0.420299	-2.24682	-2.24071	-2.09304	-1.96806
YGR207C	CIR1	TFIID	21.9331	1446	-0.177069	0.068508	-0.041236	-1.15731	-0.704554	-0.436006	-2.75495	-2.53167	-2.3824	-2.57235
YNL010W	YNL010W	TFIID	21.9239	1447	-0.173496	-0.00179816	-0.0656071	-1.70051	-1.28961	-0.770193	-2.87123	-1.85118	-1.83394	-1.72476
YGR184C	UBR1	TFIID	21.9085	1448	0.0539104	0.0607641	-0.0821217	-1.70923	-1.05474	-0.546029	-2.18758	-1.90947	-2.05301	-1.87032
YPL195W	APL5	TFIID	21.8823	1449	0.00678046	0.198678	0.0206619	-1.68023	-1.03183	-0.503065	-2.16052	-1.96752	-2.1115	-1.85235
YDR378C	LSM6	TFIID	21.8805	1450	-0.208416	0.340664	0.240468	-0.757252	-1.06835	-1.04418	-2.15557	-1.52488	-1.08164	-1.14361
YBR253W	SRB6	TFIID	21.8799	1451	-0.182379	0.262418	0.1752	-1.28925	-0.891382	-0.531155	-1.99229	-1.58523	-1.95851	-1.45728
YIL056W	VHR1	CR	21.8719	1452	-0.0979311	-0.532667	0.241445	-1.42911	-1.46469	-1.36641	-0.0484782	0.189227	-0.0432124	-0.50351
YOR085W	OST3	TFIID	21.8286	1453	-0.175553	0.0925925	-0.160041	-1.86078	-1.20698	-0.67388	-2.01217	-1.76023	-1.71514	-1.73659
YHR026W	VMA16	TFIID	21.7996	1454	-0.151129	0.190825	-0.201822	-1.29808	-1.15049	-0.659644	-2.41712	-1.636	-1.51187	-1.32142
YDL112W	TRM3	TFIID	21.7979	1455	-0.0329135	0.257332	0.166745	-1.12395	-1.18434	-0.620991	-2.14464	-2.16112	-2.12456	-1.71628
YLR357W	RSC2	TFIID	21.7932	1456	-0.0454394	0.047459	0.0586834	-1.59442	-1.1446	-0.647845	-1.96071	-1.92892	-2.19767	-1.86453
YDL198C	GGC1	CR	21.7606	1457	0.0312715	-0.244629	-0.434533	-0.100304	-1.3248	-1.46561	-1.50082	-1.00491	-0.634068	-1.38191
YPR105C	COG4	TFIID	21.7566	1458	-0.016449	-0.0489703	-0.0976023	-1.44904	-1.12854	-0.680915	-2.45138	-2.1651	-2.31527	-2.20785
YBR054W	YRO2	CR	21.7556	1459	0.392317	-2.20732	-3.63902	-6.9838	-6.68566	-5.07126	-1.38751	-0.125248	0.0949137	-0.709162
YOR311C	DGK1	TFIID	21.7542	1460	-0.0431112	0.162831	0.0898411	-0.776443	-0.756679	-0.292351	-1.43898	-1.48935	-1.33112	-1.6421
YHR006W	STP2	TFIID	21.7417	1461	-0.024307	0.0181175	0.059543	-1.54767	-1.08095	-0.804812	-1.95907	-1.92967	-1.97933	-1.75536
YKR100C	SKG1	TFIID	21.7055	1462	-0.0394542	0.218886	0.284359	-1.62467	-0.849091	-0.44398	-1.96108	-1.93631	-1.85773	-1.59637
YGL013C	PDR1	TFIID	21.6934	1463	0.0123672	-0.114784	-0.256973	-1.63573	-1.2186	-0.627384	-2.40686	-2.24049	-2.52455	-2.12358
YPL053C	KTR6	TFIID	21.6858	1464	-0.101288	0.0498232	-0.0750352	-1.71571	-0.965628	-0.723327	-2.16453	-2.15391	-1.69948	-1.97242
YJR134C	SGM1	TFIID	21.6776	1465	-0.128006	0.103323	0.252352	-1.81752	-0.760799	-0.279797	-2.27554	-1.8106	-2.23963	-2.10823
YOR241W	MET7	TFIID	21.6756	1466	-0.0143561	0.185283	0.104169	-1.37078	-0.990042	-0.498592	-1.95361	-1.68632	-2.01134	-1.77865
YLL034C	RIX7	TFIID	21.6683	1467	-0.167636	0.31527	0.249723	-1.08423	-1.20996	-0.732472	-2.49267	-2.4143	-2.20153	-1.9111
YGL038C	OCH1	CR	21.6623	1468	0.122571	-0.0819016	-0.0895915	-2.03809	-1.59542	-1.05942	-1.68562	-0.949064	-1.03434	-1.41384
YKL204W	EAP1	TFIID	21.659	1469	-0.0577087	0.0622483	0.123814	-1.69822	-1.14136	-0.494125	-1.9443	-1.61171	-2.18703	-1.87467
YDR146C	SWI5	TFIID	21.6338	1470	0.00591381	-0.140852	-0.153872	-2.93081	-1.57372	-0.931648	-2.3284	-1.99086	-2.36895	-1.7823
YKR031C	SPO14	TFIID	21.6325	1471	-0.0652874	0.0430376	-0.0389359	-1.7063	-0.765657	-0.335802	-2.21266	-2.12956	-2.21257	-1.81081
YPR125W	YLH47	TFIID	21.6284	1472	-0.0643203	0.0541418	-0.0949736	-1.18626	-1.41711	-1.02412	-2.30425	-2.36239	-2.79336	-2.41285
YKR061W	KTR2	CR	21.6061	1473	0.0326806	-0.922308	-1.19754	-0.847964	-2.57368	-2.72022	-0.50238	-0.610391	-0.336789	-0.75339
YMR255W	GFD1	TFIID	21.5995	1474	-0.235301	0.187938	0.227514	-1.9834	-1.25653	-0.616337	-2.63498	-1.53607	-2.09438	-2.24205
YNL236W	SIN4	TFIID	21.5904	1475	-0.052288	0.212091	0.116518	-1.41893	-1.04639	-0.661917	-1.83215	-1.85389	-2.06973	-1.95022
YOR191W	ULS1	TFIID	21.5899	1476	-0.0220022	0.0854969	-0.0258405	-1.85709	-0.97326	-0.535004	-2.31701	-2.23318	-2.31346	-1.91294
YIL030C	SSM4	TFIID	21.5853	1477	0.0659702	0.0566929	-0.0983336	-1.31848	-1.12259	-0.626961	-1.88338	-1.99116	-1.92303	-1.74109
YBR179C	FZO1	TFIID	21.5827	1478	0.0176694	0.0599758	0.0273189	-1.67284	-1.14623	-0.793321	-2.21333	-2.13582	-2.22903	-2.13565
YDR034C	LYS14	TFIID	21.5816	1479	0.00428984	0.22842	0.286409	-1.09158	-0.804671	-0.596039	-2.6702	-2.48331	-2.56291	-2.25747
YDR219C	MFB1	TFIID	21.56	1480	-0.0833334	-0.0993737	-0.0864228	-2.15448	-1.13098	-0.559102	-1.68555	-1.89914	-1.92727	-1.90799
YOR103C	OST2	TFIID	21.5469	1481	-0.124069	0.146575	0.0904322	-0.978069	-1.03551	-0.968996	-2.83388	-1.91186	-1.62832	-2.37776
YNL006W	LST8	TFIID	21.5437	1482	-0.0049109	0.356154	0.119502	-1.40651	-1.30448	-1.08019	-2.03155	-2.21258	-2.33796	-2.07433
YDR333C	RQC1	TFIID	21.5286	1483	0.0316631	0.26618	0.231603	-1.42419	-0.859915	-0.495858	-1.4971	-1.65904	-1.71142	-1.49012
YDR027C	VPS54	TFIID	21.5227	1484	0.0137006	0.162972	0.126553	-1.99967	-1.00921	-0.609482	-1.86959	-1.77436	-1.9306	-1.65714
YKR093W	PTR2	CR	21.4962	1485	0.541488	0.0600627	-0.497441	-1.63178	-0.00898457	0.755546	1.44262	0.148848	0.185921	-0.307252
YHR020W	YHR020W	TFIID	21.4868	1486	-0.0796121	0.390363	0.0963448	-0.741648	-1.5069	-1.10452	-2.57884	-2.07659	-1.97458	-1.79982
YJL098W	SAP185	TFIID	21.4755	1487	-0.101542	0.246555	0.304695	-0.976043	-1.38396	-0.94995	-2.46901	-2.48101	-2.64712	-2.08428
YNL239W	LAP3	CR	21.4415	1488	-0.0776906	-0.462162	-0.0985616	-1.66944	-1.35592	-1.11707	-1.20831	-1.23209	-1.05554	-1.34548
YEL061C	CIN8	TFIID	21.4351	1489	-0.0329161	-0.0699074	-0.0399917	-2.00786	-1.27513	-0.724448	-1.86825	-1.95374	-2.10183	-2.1949
YGL140C	YGL140C	TFIID	21.4086	1490	0.0487626	0.270288	0.081401	-1.60012	-0.867601	-0.352972	-1.99864	-1.95563	-2.07656	-1.76591
YPR070W	MED1	TFIID	21.3961	1491	-0.00401142	0.0624198	0.0898199	-1.5091	-1.23464	-0.788044	-2.15353	-2.15937	-2.13293	-2.06938
YBL007C	SLA1	TFIID	21.3821	1492	-0.0144544	0.10664	-0.0581833	-2.25256	-1.14266	-0.551578	-1.91332	-1.60874	-1.80086	-1.55972
YNR068C	YNR068C	TFIID	21.3758	1493	0.184116	-0.215636	-0.257958	-1.14814	-1.75655	-1.4966	-2.56373	-1.69736	-1.96542	-2.12474
YBR142W	MAK5	TFIID	21.374	1494	-0.12238	0.233187	0.264854	-0.857063	-1.22159	-0.664001	-2.98259	-2.5814	-2.66044	-2.04696
YLR113W	HOG1	CR	21.3704	1495	-0.0775874	-0.0271052	-0.101547	-1.60411	-1.81486	-1.42638	-2.17947	-1.13183	-1.25245	-1.48154
YER129W	SAK1	TFIID	21.3644	1496	0.0193181	0.223595	0.126118	-1.68385	-1.04111	-0.651483	-1.59609	-1.66979	-1.87175	-1.7668
YNL252C	MRPL17	TFIID	21.3518	1497	-0.0914627	0.0502893	-0.00235076	-1.53284	-1.31853	-0.878651	-3.72327	-2.7478	-2.73024	-2.66191
YER127W	LCP5	TFIID	21.3466	1498	-0.0284854	0.423452	0.401917	-0.53202	-1.44467	-1.00794	-2.28384	-2.31545	-2.3872	-1.91774
YDR087C	RRP1	TFIID	21.3228	1499	-0.145185	0.31158	0.295111	-1.11849	-1.52119	-0.992817	-2.51327	-1.8017	-2.17658	-1.87687
YMR140W	SIP5	TFIID	21.322	1500	0.0332568	0.110275	0.0987715	-1.55014	-0.116137	0.287647	-1.60508	-1.61527	-1.89623	-1.89867
YDR515W	SLF1	TFIID	21.3109	1501	0.0985674	-0.00331581	-0.00164995	-1.77411	-1.23692	-0.984816	-1.82628	-2.12573	-2.28997	-2.13757
YGR158C	MTR3	TFIID	21.3011	1502	-0.172335	0.17363	0.127597	-1.15795	-1.09749	-0.693062	-2.88902	-3.16723	-3.11433	-2.74556
YOR376W-A	YOR376W-A	TFIID	21.2906	1503	0.0729315	-0.258107	-0.194326	-2.32097	-0.964258	-0.489431	-1.74259	-2.7276	-2.8139	-1.49191
YMR256C	COX7	TFIID	21.2889	1504	0.115416	-0.0307659	-0.0667446	-1.84289	-1.04968	-0.505852	-2.16659	-1.92756	-1.02963	-1.50752
YER092W	IES5	TFIID	21.2854	1505	-0.0399402	-0.00195662	0.273888	-0.441048	-0.572544	-0.278628	-2.32046	-2.26044	-1.77175	-2.33278
YHR201C	PPX1	TFIID	21.2716	1506	0.0569852	0.101582	0.022463	-1.29707	-1.33852	-0.703126	-2.03164	-1.74192	-1.86733	-2.0051
YJL176C	SWI3	TFIID	21.2625	1507	-0.0943402	0.101565	0.050409	-1.79649	-1.09263	-0.594975	-2.01762	-1.69889	-2.03708	-1.63718
YFL036W	RPO41	TFIID	21.2582	1508	0.0387079	0.115921	-0.103601	-1.65667	-0.868395	-0.517668	-2.22298	-1.7267	-1.78262	-1.81871
YDR468C	TLG1	TFIID	21.2525	1509	-0.0748909	0.244923	0.0619436	-1.37805	-0.896048	-0.499926	-2.43043	-2.43384	-2.03907	-2.09324
YDL003W	MCD1	CR	21.2506	1510	-0.217706	-0.993067	-1.0723	-2.41952	-2.45856	-1.98226	-0.836821	-0.509215	-0.4629	-0.908648
YLR019W	PSR2	TFIID	21.2465	1511	-0.00520408	0.137965	0.0523513	-1.74574	-1.21015	-0.581135	-1.9039	-2.03235	-2.11205	-1.98867
YDR407C	TRS120	TFIID	21.2276	1512	-0.0253508	0.0747607	0.0621875	-1.69027	-0.903631	-0.460692	-1.75287	-1.773	-1.86763	-1.7556
YFL048C	EMP47	TFIID	21.2232	1513	-0.0925056	0.217199	0.0211299	-1.51671	-0.992347	-0.60696	-2.23638	-1.99751	-2.03092	-1.65778
YLR181C	VTA1	TFIID	21.2198	1514	-0.0948115	0.0988284	0.113757	-1.30435	-0.657567	-0.137789	-2.10677	-1.90672	-2.0644	-2.33991
YOR157C	PUP1	TFIID	21.2172	1515	-0.128563	-0.0264386	-0.435922	-1.23732	-1.72623	-1.30587	-2.11314	-1.78895	-1.54439	-2.01165
YGR200C	ELP2	TFIID	21.2068	1516	-0.000746061	0.23701	0.0936252	-1.274	-1.33255	-0.928459	-2.89083	-2.47913	-2.43318	-2.09116
YOR021C	SFM1	TFIID	21.1998	1517	-0.158209	0.251973	0.274472	-0.879007	-1.46457	-0.928891	-2.45911	-2.40068	-2.18415	-1.90156
YDR328C	SKP1	TFIID	21.1934	1518	-0.167055	0.191486	0.0498961	-1.83021	-0.894407	-0.468583	-2.46642	-2.06564	-1.85467	-1.93945
YMR153W	NUP53	TFIID	21.1721	1519	-0.120117	0.0614445	0.0106498	-1.36213	-1.11907	-0.540976	-2.12263	-2.01158	-1.97324	-1.75657
YER082C	UTP7	TFIID	21.1672	1520	-0.159803	0.288776	0.251057	-1.05487	-1.43838	-0.852458	-3.21272	-2.62399	-2.73028	-2.32503
YJL196C	ELO1	CR	21.1389	1521	-0.0712587	-0.601286	-0.726354	-1.7037	-1.75688	-1.02605	-1.51779	-0.988493	-0.433193	-0.956047
YJL183W	MNN11	TFIID	21.133	1522	0.01543	0.180983	-0.0545334	-1.42144	-0.654329	-0.219172	-2.39604	-1.75607	-1.8603	-2.06289
YDR081C	PDC2	TFIID	21.1231	1523	-0.04979	0.167839	0.269668	-1.45741	-0.920991	-0.436435	-1.82616	-1.77454	-1.92072	-1.76334
YER166W	DNF1	TFIID	21.1217	1524	-0.0325984	-0.0444056	-0.215847	-2.03399	-1.35074	-0.873625	-2.39975	-2.13113	-2.16716	-1.98323
YBR140C	IRA1	TFIID	21.117	1525	0.0239805	0.120313	0.0163551	-1.76784	-0.864312	-0.352741	-1.95306	-1.89302	-1.83947	-1.59557
YJR091C	JSN1	TFIID	21.1088	1526	-0.0684942	-0.0544766	-0.184481	-1.98027	-1.13676	-0.617581	-1.95924	-1.8703	-1.99129	-1.81846
YLR084C	RAX2	CR	21.0958	1527	0.0448219	-0.193302	-0.348221	-1.40189	-1.54183	-1.16749	-1.56782	-1.02071	-1.02988	-1.20783
YJR092W	BUD4	TFIID	21.0923	1528	-0.118222	-0.0750741	-0.104802	-2.50712	-1.53823	-0.76371	-2.18595	-1.72009	-1.93412	-1.66133
YDR326C	YSP2	TFIID	21.0884	1529	-0.0630012	0.0461709	-0.0454168	-1.34046	-0.825307	-0.343105	-2.06904	-1.9807	-2.06267	-1.70741
YBL085W	BOI1	TFIID	21.0817	1530	-0.0500822	-0.111979	-0.264287	-2.13717	-1.22717	-0.660967	-2.30683	-2.04909	-2.36372	-2.04181
YHR049W	FSH1	CR	21.074	1531	-0.0574708	-0.912678	-0.918542	-2.0542	-3.1922	-2.89742	-1.60154	-0.840978	-0.926418	-0.865074
YNR022C	MRPL50	TFIID	21.0702	1532	-0.113797	0.15665	0.322547	-1.21833	-0.925332	-0.276323	-2.11809	-1.66354	-1.84352	-1.94966
YLR182W	SWI6	TFIID	21.0654	1533	0.0109302	0.0906689	0.0129515	-1.65035	-1.01692	-0.470324	-2.054	-1.99325	-2.02247	-2.13611
YKR092C	SRP40	TFIID	21.0621	1534	-0.170762	0.461993	0.163814	-0.614932	-1.46588	-0.982774	-2.73604	-2.33078	-2.28319	-2.56134
YIL094C	LYS12	TFIID	21.0565	1535	-0.223667	-0.00427806	-0.119338	-0.0708147	-1.18599	-0.753514	-2.18915	-1.9957	-2.25377	-1.80992
YGL151W	NUT1	TFIID	21.0508	1536	-0.0710437	0.344627	0.330407	-1.8651	-0.969215	-0.53079	-1.63157	-1.52086	-1.60737	-1.41308
YGR072W	UPF3	TFIID	21.0404	1537	-0.0838251	0.320531	0.272823	-1.22222	-0.877393	-0.241106	-2.17972	-1.80763	-2.00662	-2.18324
YOR283W	YOR283W	TFIID	21.0379	1538	0.0549887	0.10026	-0.104393	-1.3418	-1.01112	-0.881222	-2.72638	-2.88527	-2.07661	-2.17778
YDR150W	NUM1	TFIID	21.0311	1539	-0.0961521	-0.11003	-0.11944	-1.91759	-1.16964	-0.578288	-1.97308	-1.63299	-1.90884	-1.63519
YHL002W	HSE1	TFIID	21.0161	1540	-0.0895815	0.128239	-0.0427401	-1.70498	-1.05072	-0.473634	-1.71196	-1.64442	-1.90326	-1.83397
YBR149W	ARA1	CR	21.0026	1541	-0.151977	-0.141203	-0.485037	-2.273	-0.942572	-0.635059	-1.368	-1.20547	-1.29259	-1.43814
YGL090W	LIF1	TFIID	20.9868	1542	-0.114179	-0.0975231	-0.181532	-1.61164	-0.782316	-0.517899	-2.25527	-1.75055	-1.96226	-2.03904
YNL216W	RAP1	TFIID	20.9723	1543	-0.085684	0.255465	0.161875	-1.95023	-1.43536	-0.903219	-2.30727	-2.35047	-2.38979	-2.36171
YLR023C	IZH3	TFIID	20.9706	1544	0.0214133	0.285543	0.069266	-0.611396	-0.447672	-0.273449	-1.4109	-1.12734	-1.16429	-1.30222
YBL050W	SEC17	TFIID	20.9692	1545	0.0191798	0.123972	-0.106907	-1.46456	-0.704315	-0.544339	-2.30285	-1.90309	-1.53652	-1.86167
YKL154W	SRP102	TFIID	20.9635	1546	-0.236395	0.175976	0.0166534	-1.27705	-1.06924	-0.695424	-2.03763	-1.81046	-1.85592	-1.683
YDL073W	YDL073W	TFIID	20.9581	1547	-0.110971	0.228727	0.344709	-1.23083	-0.394369	-0.0103609	-1.54966	-1.69897	-1.65629	-1.61144
YPL184C	MRN1	TFIID	20.9375	1548	-0.0194575	0.125618	0.00488048	-1.97	-1.06258	-0.698304	-1.82927	-1.53161	-1.45618	-1.36781
YIL091C	UTP25	TFIID	20.9198	1549	-0.0931317	0.334263	0.416254	-0.834133	-1.3441	-0.891282	-2.35582	-2.13302	-2.20526	-1.98351
YKL192C	ACP1	TFIID	20.9181	1550	-0.0598279	-0.181277	-0.421368	-1.57529	-1.34564	-1.08001	-2.2952	-2.32546	-2.24388	-1.78421
YJL207C	LAA1	TFIID	20.9111	1551	0.0390637	0.174446	0.0150613	-1.6889	-1.12304	-0.622584	-2.17176	-2.04582	-2.10756	-1.89607
YLR371W	ROM2	TFIID	20.8986	1552	-0.0173407	0.0459703	-0.103238	-1.97127	-1.09932	-0.636497	-1.92793	-1.85662	-1.77486	-1.68883
YKL213C	DOA1	TFIID	20.8942	1553	-0.101359	-0.0140302	-0.198221	-2.00429	-1.62404	-1.14033	-1.91002	-1.76245	-1.87192	-1.99304
YNL156C	NSG2	TFIID	20.8827	1554	0.0751359	-0.169763	-0.0978917	-1.55197	-0.895472	-0.5122	-1.80963	-1.6786	-1.65417	-1.86954
YDR390C	UBA2	TFIID	20.8822	1555	-0.0243679	0.233371	0.145118	-1.46861	-0.919517	-0.662909	-2.44832	-2.5336	-2.5204	-2.27501
YPR008W	HAA1	TFIID	20.8782	1556	0.065345	-0.00456365	-0.146193	-1.84909	-1.80229	-1.21677	-2.57067	-2.23711	-2.50686	-2.28144
YNL039W	BDP1	TFIID	20.8691	1557	-0.0445954	0.137697	0.201585	-1.98186	-1.22888	-0.568845	-2.35448	-1.90841	-2.21514	-2.16661
YEL001C	IRC22	TFIID	20.8522	1558	-0.0734302	0.0939605	-0.3612	-1.2875	-0.937303	-0.565837	-3.046	-2.36013	-1.64959	-1.82176
YDL085C-A	YDL085C-A	TFIID	20.8503	1559	-0.216107	0.111731	0.192163	-0.721284	-0.894965	-0.079736	-2.63365	-1.30476	-1.3196	-1.83856
YDR334W	SWR1	TFIID	20.833	1560	0.0447277	-0.05859	-0.19977	-1.94187	-1.58209	-0.991423	-2.2985	-2.05924	-2.14505	-2.18757
YLR133W	CKI1	TFIID	20.823	1561	-0.0224504	-0.268728	-0.128507	-3.46427	-1.79325	-1.33454	-2.53005	-2.18764	-2.30261	-2.14178
YMR129W	POM152	TFIID	20.7853	1562	-0.0531736	0.213289	0.0636022	-1.52808	-1.02925	-0.671655	-2.22871	-1.90227	-1.96086	-1.80668
YJL069C	UTP18	TFIID	20.7847	1563	-0.150065	0.300225	0.202217	-0.684613	-1.2397	-0.698218	-2.2202	-1.99446	-2.17959	-2.19149
YOR323C	PRO2	TFIID	20.7822	1564	-0.129994	0.22658	-0.0347551	-1.25627	-1.22783	-0.828676	-2.38331	-1.85648	-1.58485	-1.59938
YLR370C	ARC18	TFIID	20.7761	1565	-0.0913655	0.0129415	-0.101548	-2.16205	-1.39645	-0.973262	-1.90767	-1.66718	-1.40401	-1.50016
YMR305C	SCW10	CR	20.7729	1566	-0.0761786	-0.360015	-0.799909	-2.20412	-1.6034	-0.730273	-1.10451	-0.415366	-0.501312	-0.774332
YML031W	NDC1	TFIID	20.769	1567	-0.0832562	0.2098	0.16063	-1.32694	-1.03103	-0.442884	-1.7937	-1.84398	-1.71881	-1.91722
YJR086W	STE18	TFIID	20.7582	1568	-0.339031	0.0377546	0.20949	-1.32596	-0.902125	-0.53558	-2.13763	-1.84465	-1.37041	-1.03329
YCR042C	TAF2	TFIID	20.7395	1569	0.0708603	0.21963	0.127675	-1.57975	-0.804261	-0.264717	-2.29958	-1.95296	-2.0223	-1.76953
YGL091C	NBP35	TFIID	20.7296	1570	-0.0920135	-0.158786	-0.33832	-0.532959	-0.857306	-0.729233	-2.06008	-1.93465	-2.0903	-2.08746
YBR165W	UBS1	TFIID	20.7277	1571	-0.0628308	0.120394	0.220864	-1.54928	-0.724084	-0.368521	-1.85401	-2.2388	-2.23505	-1.89201
YJL082W	IML2	CR	20.7129	1572	-0.013714	-1.17876	-0.772738	-3.52742	-2.60485	-2.32814	-1.15462	-1.36251	-1.33746	-1.08719
YER007C-A	TMA20	TFIID	20.7094	1573	-0.167576	-0.0201225	-0.141409	-1.14543	-1.20914	-0.727455	-2.81422	-2.17521	-2.03905	-2.18794
YPR100W	MRPL51	TFIID	20.709	1574	-0.166685	0.125972	0.122527	-1.77777	-1.38159	-0.898326	-2.47202	-1.65325	-1.35867	-2.094
YNL219C	ALG9	TFIID	20.7026	1575	-0.0371228	5.05e-05	-0.118844	-1.67371	-1.1593	-0.660326	-2.39685	-2.29315	-2.04512	-2.05919
YOR145C	PNO1	TFIID	20.7005	1576	-0.198269	0.297383	0.211618	-0.569647	-1.44639	-1.11292	-3.34926	-2.7928	-2.18519	-2.52515
YOR048C	RAT1	TFIID	20.6861	1577	-0.161235	0.153659	0.147297	-1.46887	-1.13554	-0.629788	-2.45644	-2.07451	-2.38488	-1.80828
YKR067W	GPT2	TFIID	20.6841	1578	0.497124	0.430779	-0.00301622	-1.25582	-0.44461	-0.211983	-1.45832	-1.75583	-1.39682	-1.88043
YDR166C	SEC5	TFIID	20.6775	1579	-0.0383657	0.149157	0.139713	-1.89417	-0.854693	-0.472214	-1.84185	-1.73856	-1.83725	-1.70506
YDR337W	MRPS28	TFIID	20.6729	1580	-0.152782	0.292906	0.0870194	-1.72113	-0.988813	-0.79197	-2.51568	-2.03525	-2.2017	-2.18423
YHR021C	RPS27B	TFIID	20.6727	1581	-0.325309	-0.18673	-0.0730656	-0.62415	-1.42035	-0.716731	-2.23296	-2.15417	-1.54923	-1.50447
YNL167C	SKO1	TFIID	20.6451	1582	-0.0398993	0.0318947	-0.00171781	-2.06057	-1.26027	-0.531402	-1.8791	-1.87484	-1.93491	-1.94111
YEL007W	MIT1	CR	20.6425	1583	-0.0491427	-0.0443424	0.0733429	-1.54452	-1.54235	-1.26313	-0.0681696	0.439412	0.257059	-0.468245
YAL019W	FUN30	TFIID	20.6407	1584	-0.126737	0.215192	0.279268	-1.33959	-1.11457	-0.570288	-2.54931	-2.30642	-2.45672	-1.99801
YOR124C	UBP2	TFIID	20.6321	1585	0.0189097	0.168671	-0.0132808	-1.91124	-0.871048	-0.369631	-2.37361	-2.07148	-2.0475	-1.95649
YER176W	ECM32	TFIID	20.6273	1586	-0.00479139	0.0787975	0.138508	-1.00956	-0.832036	-0.398288	-2.19626	-1.73705	-2.08646	-1.78358
YMR149W	SWP1	TFIID	20.627	1587	-0.0829965	0.239883	-0.105157	-1.58914	-1.00313	-0.823031	-2.14058	-1.98911	-1.89088	-1.83385
YMR064W	AEP1	TFIID	20.626	1588	-0.0663887	0.248199	0.247577	-1.47011	-0.819703	-0.392597	-2.12489	-2.23366	-2.11652	-2.01241
YNL232W	CSL4	TFIID	20.6228	1589	-0.111853	0.294323	0.260781	-0.763865	-1.04319	-0.602615	-3.0494	-2.44617	-2.50388	-2.37367
YOR004W	UTP23	TFIID	20.6193	1590	-0.223105	0.0466274	0.290119	-0.902299	-1.47887	-0.915046	-2.7847	-2.53936	-2.97184	-2.3506
YOR315W	SFG1	CR	20.5934	1591	-0.204579	-0.195639	-0.554543	-2.43951	-2.65119	-1.87788	-1.41202	-0.0939655	-0.239386	-0.588027
YDL167C	NRP1	TFIID	20.5831	1592	-0.06356	0.313249	0.0930085	-0.775743	-1.29237	-0.991647	-2.24377	-2.21048	-2.13832	-1.81807
YOR036W	PEP12	TFIID	20.5809	1593	-0.138166	0.0130249	0.0222598	-1.86003	-1.03702	-0.470775	-1.83118	-1.98324	-1.77794	-1.9983
YGL231C	EMC4	TFIID	20.5771	1594	-0.20926	0.294724	0.102969	-1.03308	-0.598173	0.00105563	-1.73318	-1.95318	-1.6661	-1.88354
YMR004W	MVP1	TFIID	20.5717	1595	-0.136009	-0.242739	-0.0617923	-2.09391	-1.15103	-0.589198	-2.21728	-2.15079	-2.31345	-2.2676
YGR082W	TOM20	TFIID	20.5586	1596	-0.091992	0.118163	0.0444968	-1.45891	-1.44562	-1.07204	-2.59179	-2.26285	-1.79288	-2.52083
YGR215W	RSM27	TFIID	20.5396	1597	-0.20001	0.233448	0.157908	-1.06529	-0.705947	-0.232915	-2.2945	-2.15923	-1.10406	-2.0153
YDR177W	UBC1	TFIID	20.5257	1598	-0.0302499	0.293618	0.132343	-1.11829	-1.07753	-0.679724	-1.79172	-1.58157	-1.20191	-1.63902
YKL015W	PUT3	TFIID	20.5221	1599	0.0690172	0.19758	0.112238	-1.62182	-1.13045	-0.602459	-2.11723	-2.16232	-2.28691	-1.93184
YEL037C	RAD23	TFIID	20.4986	1600	-0.0100338	0.295426	0.0719754	-1.52371	-1.65637	-1.09618	-2.82656	-2.51678	-2.67029	-2.41118
YAL036C	RBG1	TFIID	20.498	1601	-0.0812371	0.286283	0.0742726	-0.445484	-1.11154	-0.848979	-2.44179	-2.00785	-1.83959	-1.83398
YLR195C	NMT1	TFIID	20.4924	1602	-0.0557297	0.215267	0.137347	-1.33708	-0.799952	-0.40494	-2.60256	-2.35359	-2.10429	-2.05636
YER164W	CHD1	TFIID	20.4908	1603	-0.124991	0.309912	0.17616	-1.85726	-1.18849	-0.597389	-2.52368	-2.0882	-2.2124	-1.84904
YLR093C	NYV1	TFIID	20.4625	1604	-0.0640506	0.166654	0.0354772	-1.75602	-1.20308	-0.842392	-2.27636	-2.11657	-1.9241	-1.81055
YLR291C	GCD7	TFIID	20.4608	1605	-0.106623	0.148026	0.0328847	-1.22177	-1.18836	-1.03802	-2.21695	-2.26312	-1.76193	-2.03778
YML111W	BUL2	TFIID	20.449	1606	0.0159751	-0.119716	-0.10087	-1.52157	-1.46523	-0.934293	-2.17732	-2.01292	-2.4062	-2.04761
YDR162C	NBP2	TFIID	20.4442	1607	0.0141174	0.241083	0.410664	-1.10994	-0.487545	-0.113648	-2.25612	-2.0853	-1.88935	-2.58477
YKL100C	YPF1	TFIID	20.4431	1608	-0.150137	0.108676	-0.259748	-2.20811	-1.32752	-0.692836	-2.26103	-2.01251	-2.04985	-1.84013
YJL060W	BNA3	TFIID	20.4251	1609	-0.107882	-0.0807971	-0.45805	-0.441874	-0.48455	-0.40453	-1.04047	-1.69267	-1.39651	-1.24341
YLR086W	SMC4	TFIID	20.4064	1610	-0.0682299	0.0962138	0.11463	-1.86919	-0.885478	-0.271785	-2.23177	-2.05909	-2.15414	-2.04705
YNL162W	RPL42A	TFIID	20.4057	1611	-0.0779928	-0.192133	-0.224397	-1.12134	-1.44674	-1.25712	-2.554	-2.10409	-1.68389	-1.31905
YKR026C	GCN3	TFIID	20.3996	1612	-0.104241	0.17369	0.0779462	-1.28239	-1.53589	-0.969575	-2.57184	-2.27751	-2.3668	-2.38991
YAL040C	CLN3	CR	20.3853	1613	-0.0310873	-0.0605463	0.0846467	-0.990599	-0.964404	-0.745124	-0.412678	-0.146833	-0.469911	-0.785136
YJL110C	GZF3	TFIID	20.3717	1614	-0.0632715	0.235176	0.115129	-1.46146	-0.959934	-0.824748	-2.26421	-2.36622	-2.42159	-2.33929
YOR307C	SLY41	TFIID	20.3445	1615	-0.126184	0.184911	0.25147	-1.49001	-1.13299	-0.634574	-2.17337	-1.96074	-1.97049	-1.6767
YBR002C	RER2	TFIID	20.3438	1616	-0.0828411	0.2194	0.0162009	-1.4073	-1.14375	-0.892077	-2.56652	-2.48855	-2.20327	-2.46119
YDR423C	CAD1	TFIID	20.341	1617	-0.193437	-0.0158443	0.124762	-1.59134	-1.08783	-0.426641	-2.61596	-2.04539	-1.79831	-1.87336
YIL116W	HIS5	CR	20.3297	1618	0.0440688	0.265548	0.3115	-0.589068	-0.0979871	-0.134525	-0.917851	-1.0008	-0.500675	-1.1038
YDR505C	PSP1	TFIID	20.329	1619	0.00337587	0.144918	-0.182927	-2.33007	-1.12666	-0.75956	-2.53008	-2.34204	-2.33661	-2.35578
YDR477W	SNF1	TFIID	20.3117	1620	-0.0574517	0.117853	0.0399093	-2.11366	-1.36637	-0.765548	-1.82859	-1.80876	-1.96837	-1.8118
YEL043W	YEL043W	TFIID	20.3038	1621	-0.0667742	0.0858236	0.0379672	-1.51081	-1.22775	-0.710972	-2.10559	-1.98626	-2.19294	-2.02545
YDL095W	PMT1	TFIID	20.2725	1622	-0.108308	-0.048548	-0.231583	-1.80798	-1.86045	-1.19275	-2.3908	-1.98937	-1.85614	-1.77276
YPL085W	SEC16	TFIID	20.2543	1623	-0.0552648	0.154378	0.108058	-1.79087	-1.01342	-0.404384	-2.19193	-1.76802	-1.90283	-1.71429
YGL107C	RMD9	TFIID	20.2455	1624	-0.0147879	0.290896	0.133808	-1.56392	-1.20391	-0.84377	-1.60376	-1.79635	-1.79971	-1.62582
YLR312W-A	MRPL15	TFIID	20.2378	1625	-0.0303403	0.362792	0.0703237	-1.78128	-1.20956	-0.726971	-2.08043	-1.77617	-1.91833	-1.69197
YNR017W	TIM23	TFIID	20.2011	1626	-0.148327	0.00539422	-0.0114309	-1.31429	-1.64339	-1.19427	-3.15406	-2.31328	-2.23848	-2.60922
YML015C	TAF11	TFIID	20.1899	1627	-0.0959816	0.199057	0.260991	-1.44195	-1.08362	-0.607897	-1.79296	-1.9343	-1.99393	-2.12422
YMR237W	BCH1	TFIID	20.1887	1628	-0.0382925	0.247699	0.00448389	-1.976	-1.17155	-0.551028	-2.07478	-1.87624	-1.78494	-1.5961
YDR388W	RVS167	TFIID	20.1883	1629	-0.0195875	0.0139482	-0.124316	-1.91688	-1.35791	-0.821963	-2.34294	-1.56274	-1.78047	-1.80112
YGR123C	PPT1	TFIID	20.1816	1630	-0.00853247	0.0146533	0.00587036	-1.46819	-1.50909	-0.980732	-3.17387	-2.61086	-2.58468	-2.37142
YNL300W	TOS6	CR	20.1608	1631	-0.264363	-1.60598	-1.91083	-3.3502	-2.67416	-1.48427	-0.502951	-0.266961	-0.00296089	-0.733835
YDR331W	GPI8	TFIID	20.1583	1632	-0.104505	0.129937	0.118913	-1.83148	-1.1591	-0.526975	-2.10189	-2.05627	-2.02812	-2.03705
YKR062W	TFA2	TFIID	20.1577	1633	-0.11811	0.0619675	0.0223215	-1.12987	-0.917574	-0.402124	-1.79782	-1.00914	-1.00741	-1.27425
YPL084W	BRO1	TFIID	20.1524	1634	-0.0465771	0.214988	0.147522	-1.89034	-0.650673	-0.296756	-2.62218	-2.10843	-2.16949	-2.32797
YPL183C	RTT10	TFIID	20.1467	1635	0.00192214	0.165572	0.0149009	-1.13573	-1.35933	-0.916665	-2.72584	-2.49473	-2.54422	-1.99215
YGL082W	YGL082W	TFIID	20.1421	1636	-0.00195003	-0.0840975	-0.264013	-2.01293	-1.29738	-0.758414	-2.0856	-2.17382	-2.331	-2.04052
YDR389W	SAC7	TFIID	20.1153	1637	0.0191119	0.13492	0.055365	-1.33599	-0.996366	-0.428391	-2.03584	-1.85846	-1.86861	-1.79524
YNL188W	KAR1	TFIID	20.0917	1638	-0.116967	0.0707465	0.246667	-1.54503	-1.05843	-0.714286	-2.35974	-2.2716	-2.30859	-2.50286
YBR080C	SEC18	TFIID	20.09	1639	-0.015268	0.0714933	-0.168534	-1.63472	-1.03409	-0.456099	-2.60435	-2.00937	-2.14773	-2.0102
YIR006C	PAN1	TFIID	20.0583	1640	-0.0301895	0.060999	-0.107342	-2.07565	-1.24905	-0.576137	-2.32749	-1.84155	-2.17132	-1.83453
YGR274C	TAF1	TFIID	20.0521	1641	-0.0132844	0.0754385	0.0985867	-1.62205	-0.954904	-0.375182	-2.03035	-1.91257	-2.16285	-1.79839
YBR187W	GDT1	TFIID	20.04	1642	0.015462	-0.146642	-0.275859	-1.21561	-1.43777	-1.00912	-2.95859	-2.62751	-2.31069	-2.92007
YPL143W	RPL33A	TFIID	20.0378	1643	-0.208907	-0.172685	-0.339451	-0.998501	-1.58534	-1.19429	-2.3855	-1.76676	-1.14774	-1.21821
YHR030C	SLT2	TFIID	20.0356	1644	0.0290598	0.03117	-0.173775	-1.35034	-1.61226	-1.39387	-1.72263	-1.44551	-1.7167	-1.72356
YMR077C	VPS20	TFIID	20.0205	1645	-0.12864	0.209612	0.349169	-1.35239	-0.447216	-0.0901701	-2.08743	-2.07141	-2.3397	-1.92405
YPR189W	SKI3	TFIID	20.0108	1646	-0.0787075	0.10597	0.028019	-1.60607	-1.02778	-0.466767	-2.38277	-1.87801	-1.91937	-1.86547
YMR024W	MRPL3	TFIID	20.0028	1647	-0.0662012	0.282478	0.0623318	-1.71191	-1.30178	-0.841413	-1.58513	-1.75498	-1.86681	-1.79682
YJL044C	GYP6	TFIID	19.9888	1648	-0.0291516	0.238933	0.181006	-1.58312	-0.812884	-0.358183	-3.05999	-2.76555	-2.69549	-2.4413
YDL240W	LRG1	TFIID	19.9779	1649	0.0734185	0.0606109	-0.179485	-1.80202	-1.10357	-0.556714	-2.08246	-1.96444	-2.25861	-2.11527
YML062C	MFT1	TFIID	19.974	1650	-0.0252621	0.345788	0.252915	-1.30459	-0.694332	-0.0886879	-1.91521	-1.78622	-1.91205	-1.86198
YLR274W	MCM5	TFIID	19.9717	1651	0.0710908	0.126591	-0.00565483	-1.44042	-0.905356	-0.554378	-2.24726	-2.04768	-2.24612	-1.86026
YER080W	AIM9	TFIID	19.9652	1652	-0.0825377	-0.0538281	-0.0877767	-1.91554	-1.33315	-0.81867	-2.71752	-2.31647	-2.53714	-2.00579
YOR001W	RRP6	TFIID	19.9649	1653	-0.0678527	0.260942	0.198715	-1.45159	-1.08986	-0.635802	-2.44393	-2.18132	-2.30232	-1.98425
YKL126W	YPK1	TFIID	19.9472	1654	0.0721529	-0.065124	-0.22932	-2.40658	-1.46028	-0.916611	-1.93491	-2.13241	-2.08573	-1.77155
YMR099C	YMR099C	TFIID	19.9378	1655	-0.173731	0.319717	-0.0153728	-1.31548	-0.510702	-0.146476	-2.47865	-1.615	-1.89127	-1.30214
YDR116C	MRPL1	TFIID	19.9159	1656	-0.108574	0.209099	0.173917	-1.8258	-1.36061	-0.93137	-2.60706	-2.30286	-2.00111	-2.52497
YLR298C	YHC1	TFIID	19.9122	1657	-0.233263	-0.0435101	0.296127	-1.65675	-0.787502	-0.447088	-2.42257	-2.2008	-1.86378	-2.76852
YBL061C	SKT5	TFIID	19.9024	1658	-0.132603	0.0443839	-0.099042	-1.15441	-1.6599	-1.3696	-1.66159	-1.7613	-1.9923	-1.76817
YKR059W	TIF1	TFIID	19.8932	1659	-0.16477	0.134896	-0.10561	-1.32707	-1.5931	-1.1752	-2.19631	-1.52043	-1.4922	-1.20128
YLR332W	MID2	TFIID	19.8882	1660	0.0137108	-0.329998	-0.337824	-1.17468	-1.40484	-1.10134	-1.85901	-1.82783	-1.92676	-1.70949
YDR398W	UTP5	TFIID	19.8725	1661	-0.072127	0.0889244	0.145108	-0.747397	-1.63865	-1.32132	-2.48569	-2.46695	-2.42092	-2.29896
YMR128W	ECM16	TFIID	19.8666	1662	-0.182699	0.306558	0.363697	-1.27761	-1.43732	-0.722423	-2.55736	-2.31013	-2.35281	-1.9216
YGR250C	YGR250C	CR	19.8414	1663	0.12206	-0.329371	-1.06317	-2.36119	-0.859612	-0.674044	-1.44953	-1.07787	-1.20961	-1.70916
YOR234C	RPL33B	TFIID	19.8393	1664	-0.285418	-0.0562858	-0.239266	-0.88752	-1.5248	-1.17016	-2.36057	-2.20342	-1.70675	-1.57945
YKR089C	TGL4	TFIID	19.8128	1665	0.012986	0.00489158	-0.270304	-2.01637	-1.18171	-0.680013	-1.56781	-1.51365	-1.702	-1.7901
YPR119W	CLB2	CR	19.8114	1666	0.0663469	0.0603222	-0.124691	-2.30042	-2.04501	-1.18246	-1.47781	-0.809897	-0.864742	-1.18531
YPR004C	AIM45	TFIID	19.7966	1667	-0.0918273	0.00957584	-0.145376	-1.67149	-1.15686	-0.813383	-2.50235	-2.49335	-1.88827	-2.35524
YIL127C	RRT14	TFIID	19.7805	1668	-0.191752	0.0952283	0.465907	-0.854534	-1.40018	-0.692216	-2.31165	-1.65493	-1.80702	-1.91801
YLR079W	SIC1	CR	19.7586	1669	-0.0519883	-0.210443	-0.0405513	-2.04385	-1.66826	-1.18533	-1.12423	-0.686756	-0.974749	-1.08211
YIR004W	DJP1	TFIID	19.7442	1670	-0.118975	0.252565	0.278561	-1.50536	-0.950252	-0.265408	-2.03857	-1.8731	-1.98557	-2.05855
YOR316C	COT1	TFIID	19.7373	1671	-0.426337	-0.356046	-0.142513	-1.04699	-1.28565	-1.25151	-1.8608	-1.45199	-1.63674	-1.48196
YPR161C	SGV1	TFIID	19.7128	1672	-0.090084	0.126469	0.126927	-1.68099	-1.26245	-0.663175	-2.33193	-2.12158	-2.05925	-2.089
YLL014W	EMC6	TFIID	19.711	1673	-0.143792	0.284811	0.11001	-1.40694	-0.890293	-0.44043	-2.65963	-1.80313	-1.55021	-1.81062
YNL256W	FOL1	TFIID	19.6858	1674	-0.108604	-0.405314	-0.102694	-1.7265	-1.77672	-1.36412	-2.04498	-2.36824	-2.25259	-1.93164
YNL139C	THO2	TFIID	19.6534	1675	0.0229365	0.125107	0.0272527	-1.81875	-0.950347	-0.450737	-2.19608	-1.90825	-1.97512	-1.71024
YOR340C	RPA43	TFIID	19.6521	1676	-0.102531	0.358395	0.233779	-1.03178	-1.46844	-1.18299	-2.36774	-2.16282	-2.15233	-2.16713
YNL306W	MRPS18	TFIID	19.6321	1677	-0.0848652	0.188205	-0.0386399	-1.59094	-1.24732	-0.831738	-2.38433	-2.30439	-2.15443	-2.01886
YDR313C	PIB1	TFIID	19.6252	1678	-0.115714	-0.0160341	-0.113661	-1.67443	-0.961762	-0.571998	-2.17797	-2.11097	-2.37597	-2.12808
YEL052W	AFG1	TFIID	19.6143	1679	0.0250543	-0.142258	-0.12092	-1.20928	-0.876402	-0.74568	-0.921742	-1.54349	-1.37339	-1.64968
YOR056C	NOB1	TFIID	19.5955	1680	-0.0887074	0.19948	0.26615	-0.697839	-1.42238	-0.790936	-2.4848	-2.35944	-2.58773	-2.12769
YGL194C	HOS2	TFIID	19.5934	1681	-0.0421898	0.131087	0.293675	-1.44443	-0.861022	-0.193127	-1.2983	-1.60493	-1.71082	-1.39736
YOR101W	RAS1	TFIID	19.588	1682	-0.173407	-0.558775	-0.598439	-1.44033	-2.47432	-1.88644	-4.47658	-2.76901	-2.6651	-2.60364
YKR096W	ESL2	TFIID	19.5825	1683	0.0219711	0.0874655	0.0327571	-1.60119	-0.688718	-0.245684	-2.15879	-2.2993	-2.40768	-2.05211
YKL109W	HAP4	CR	19.5803	1684	0.288502	0.047697	-0.626925	-2.41434	-2.0924	-1.37653	0.683254	0.336219	-0.082927	-0.268387
YLR275W	SMD2	TFIID	19.5793	1685	-0.0482447	0.248711	0.269649	-0.631873	-0.269499	-0.355782	-2.53583	-1.76901	-1.99449	-2.22103
YGL020C	GET1	TFIID	19.5653	1686	0.014971	0.157609	0.226956	-1.51658	-1.13125	-0.804243	-1.89823	-1.99026	-1.59458	-1.73917
YML105C	SEC65	TFIID	19.5557	1687	-0.238917	0.168202	0.0345368	-1.6751	-0.935221	-0.633414	-2.56532	-2.24459	-2.15813	-1.89548
YOR030W	DFG16	TFIID	19.5458	1688	0.0262664	0.0135458	0.091851	-1.67792	-0.931789	-0.650668	-1.67615	-1.4723	-1.52663	-1.5805
YKL049C	CSE4	TFIID	19.5358	1689	-0.174386	0.0695935	0.201877	-1.38184	-0.892648	-0.212851	-2.18657	-2.21204	-2.16788	-2.42837
YLR412W	BER1	TFIID	19.5214	1690	-0.16604	0.140771	0.131309	-1.055	-0.631543	-0.180985	-2.17175	-1.9207	-2.50034	-1.82669
YLR301W	HRI1	TFIID	19.4896	1691	-0.373923	0.00895021	-0.126335	-1.80288	-1.12569	-0.846982	-3.04559	-2.04583	-1.51831	-1.30745
YLR305C	STT4	TFIID	19.4807	1692	-0.0891337	0.0778194	-0.0221559	-1.79322	-1.17197	-0.720815	-2.70112	-2.42617	-2.48339	-2.06719
YOR322C	LDB19	TFIID	19.4779	1693	-0.0168343	0.211443	0.197288	-1.42706	-0.826594	-0.514501	-1.79802	-1.8576	-1.99612	-1.57279
YMR298W	LIP1	TFIID	19.4721	1694	-0.214038	-0.357641	-0.653688	-2.02386	-1.50382	-1.36766	-2.48338	-2.28001	-2.02534	-1.88687
YDR184C	ATC1	TFIID	19.4611	1695	-0.0226209	0.295446	0.21765	-0.907675	-1.55619	-1.14949	-2.67435	-2.75257	-2.7176	-2.38779
YDL037C	BSC1	CR	19.4488	1696	-0.0769974	-1.49038	-0.95202	-4.14726	-5.66724	-6.04493	-1.00052	-0.65232	-0.70705	-0.941385
YNL201C	PSY2	TFIID	19.4467	1697	-0.140928	0.0563002	-0.109506	-1.15699	-1.46096	-0.963025	-2.39128	-2.36845	-2.4678	-2.2364
YHR107C	CDC12	TFIID	19.4463	1698	-0.146398	-0.0561052	-0.0966977	-1.69258	-1.3429	-0.948502	-2.35947	-1.93415	-2.24245	-1.93748
YGR251W	NOP19	TFIID	19.4281	1699	-0.148165	0.229217	0.266828	-0.38366	-0.711995	-0.529453	-2.57548	-2.25582	-2.84115	-2.28959
YDR141C	DOP1	TFIID	19.4263	1700	-0.0120868	0.166304	0.0864972	-1.62115	-0.968939	-0.520344	-2.25611	-2.03613	-2.05599	-1.80003
YHR009C	TDA3	TFIID	19.4185	1701	-0.0721866	0.0431558	-0.197692	-1.70425	-1.3709	-0.895925	-2.59681	-2.37859	-2.4368	-2.21777
YDL060W	TSR1	TFIID	19.4184	1702	-0.0958725	0.360682	0.251343	-0.765242	-1.48935	-0.860335	-2.58932	-2.34432	-2.43064	-2.15561
YNL081C	SWS2	TFIID	19.416	1703	-0.0368127	0.361959	0.145274	-1.11037	-0.741948	-0.407269	-2.35661	-2.45995	-1.4853	-2.28837
YCL010C	SGF29	TFIID	19.4036	1704	0.014432	0.147082	0.12087	-1.62163	-0.983419	-0.553857	-2.68433	-2.13837	-2.44313	-2.066
YMR272C	SCS7	CR	19.3698	1705	-0.271055	-0.113401	-0.367455	-2.26937	-1.65328	-1.54283	-2.00851	-0.876576	-0.886548	-1.20579
YER178W	PDA1	TFIID	19.3659	1706	-0.173675	0.13057	-0.254921	-1.14593	-1.1612	-0.864998	-2.30557	-1.56702	-1.47783	-1.20207
YLR363C	NMD4	TFIID	19.3606	1707	0.060121	0.0703778	0.0827685	-1.44839	-0.342623	-0.19367	-2.11008	-1.88381	-1.90816	-1.80509
YIR018W	YAP5	TFIID	19.3326	1708	-0.293463	-0.0911721	0.34965	-0.224898	-0.833046	-0.918992	-2.1428	-2.32384	-2.01494	-2.20025
YGL056C	SDS23	TFIID	19.3242	1709	-0.0285312	0.13273	0.120136	-0.791772	-1.62544	-1.12154	-2.21204	-2.23407	-2.08534	-2.05618
YNL075W	IMP4	TFIID	19.3119	1710	-0.15862	0.344063	0.43976	-0.56757	-1.09142	-0.763806	-2.56678	-2.40753	-2.16748	-1.98034
YDR120C	TRM1	TFIID	19.307	1711	-0.185544	0.424323	0.187383	-0.742002	-1.12938	-0.655154	-2.64315	-2.58278	-2.36364	-2.16796
YGL171W	ROK1	TFIID	19.2998	1712	-0.14152	0.334368	0.206888	-0.96287	-1.4647	-0.942382	-2.76961	-2.38174	-2.60099	-2.17429
YDR373W	FRQ1	TFIID	19.2858	1713	-0.197161	0.0115986	0.047228	-1.08472	-0.795103	-0.593843	-2.56171	-2.19882	-1.70471	-1.74071
YKL211C	TRP3	TFIID	19.277	1714	-0.139297	0.301807	0.144139	-0.567715	-0.709999	-0.47523	-2.40112	-1.85023	-1.76519	-1.65663
YDL207W	GLE1	TFIID	19.2759	1715	-0.0420938	0.122365	0.1849	-1.51275	-0.926301	-0.275746	-1.85418	-1.88063	-1.75879	-1.83963
YLR401C	DUS3	TFIID	19.2657	1716	-0.0207546	0.240781	0.197095	-0.864144	-1.31184	-0.773674	-3.10263	-2.60812	-2.47047	-2.14415
YLR321C	SFH1	TFIID	19.2652	1717	-0.0505468	0.189103	0.157234	-1.53895	-1.10005	-0.459643	-2.17194	-2.07495	-2.09826	-2.08283
YLR038C	COX12	TFIID	19.2542	1718	-0.384836	0.26715	-0.0527467	-1.02523	-0.165327	0.108203	-1.90902	-1.64442	-1.60886	-1.67925
YNR047W	FPK1	TFIID	19.2514	1719	0.0447728	0.0841817	-0.0551002	-1.66428	-0.823539	-0.393416	-1.82372	-1.89148	-1.99701	-1.94964
YLR185W	RPL37A	TFIID	19.2489	1720	-0.177201	0.0119341	-0.261061	-1.1339	-1.30211	-0.925466	-2.90537	-1.74777	-1.20417	-1.45758
YDR232W	HEM1	TFIID	19.2452	1721	-0.130443	0.111315	-0.141632	-1.0636	-1.31994	-0.871164	-2.26905	-2.08848	-2.35445	-1.933
YOR075W	UFE1	TFIID	19.2442	1722	-0.118236	0.116593	0.343359	-1.81733	-0.82269	-0.257882	-1.91742	-1.57579	-1.97428	-1.85814
YMR314W	PRE5	TFIID	19.2439	1723	-0.140502	0.293893	-0.654179	-1.42679	-1.31562	-1.28423	-2.44725	-2.17996	-1.50396	-1.68273
YBL103C	RTG3	TFIID	19.2297	1724	-0.0242593	0.2041	0.313244	-1.24543	-0.710322	-0.507045	-1.69791	-1.5376	-1.82618	-1.43987
YDR464W	SPP41	TFIID	19.229	1725	-0.09893	0.102769	0.166386	-1.81372	-1.0952	-0.512442	-2.4693	-2.21545	-2.44173	-2.26064
YNL301C	RPL18B	CR	19.225	1726	-0.141	0.253628	0.108366	-1.14747	-1.41186	-0.874957	-0.91716	-1.18764	-0.911488	-0.740132
YPR042C	PUF2	TFIID	19.2194	1727	-0.0432789	0.171744	0.000578189	-1.72474	-1.04607	-0.783393	-1.59009	-1.30274	-1.378	-1.43522
YDR041W	RSM10	TFIID	19.2192	1728	-0.0137178	-0.00729339	-0.0619566	-1.28478	-0.8709	-0.641016	-2.27813	-2.57438	-2.12542	-2.36752
YBR245C	ISW1	TFIID	19.2161	1729	-0.0363998	0.139636	0.0410157	-1.84628	-1.16926	-0.477108	-2.48845	-2.35947	-2.49533	-2.10701
YDR138W	HPR1	TFIID	19.2013	1730	0.0558112	0.3473	0.34787	-1.19027	-0.898981	-0.567525	-1.90338	-1.74073	-1.99253	-1.71808
YJL096W	MRPL49	TFIID	19.1974	1731	0.0458397	0.129568	0.146886	-1.56678	-1.15695	-0.904873	-2.27668	-2.18129	-1.87164	-2.03229
YIL062C	ARC15	TFIID	19.1926	1732	0.0271381	0.260443	-0.105949	-1.88064	-1.55686	-1.0561	-2.46436	-2.1182	-2.0333	-2.16963
YDL135C	RDI1	TFIID	19.178	1733	0.0377537	0.211648	0.133342	-0.956516	-0.310454	-0.209734	-1.98209	-2.07638	-1.7692	-1.65421
YIL084C	SDS3	TFIID	19.1761	1734	-0.0754506	0.125408	0.0176335	-1.61747	-0.955871	-0.510835	-2.19683	-2.19667	-2.28555	-1.96601
YNL161W	CBK1	TFIID	19.1753	1735	-0.0412045	0.340554	0.266206	-1.1824	-0.839098	-0.352647	-1.79875	-1.79102	-1.85673	-1.87946
YDR458C	HEH2	TFIID	19.1636	1736	-0.0272694	0.243831	0.0858406	-1.52812	-0.553556	-0.219069	-2.26434	-2.1575	-2.21256	-2.0713
YML092C	PRE8	TFIID	19.1632	1737	0.0170423	0.0169389	-0.468403	-1.09331	-1.67333	-1.09446	-2.20174	-2.43936	-1.85708	-2.10802
YHR013C	ARD1	TFIID	19.1581	1738	-0.154181	0.0869755	-0.0676825	-1.46891	-1.44773	-0.981332	-2.40338	-2.21339	-1.70452	-2.46712
YGL148W	ARO2	TFIID	19.1551	1739	0.00611905	0.0954462	-0.178238	-1.03334	-1.64876	-1.34798	-2.4917	-1.92578	-1.60394	-1.57277
YGL055W	OLE1	CR	19.1514	1740	-0.379674	-1.57365	-0.282877	-1.75777	-1.33374	-0.736622	-2.02113	-0.22729	-0.0185375	-0.539055
YDR001C	NTH1	CR	19.15	1741	0.146541	-0.586409	-0.860761	-2.27961	-1.46568	-1.35884	-0.37031	-0.51603	-0.633078	-0.84123
YOR095C	RKI1	TFIID	19.1465	1742	-0.149143	-0.199969	-0.1604	-0.953057	-1.90386	-1.48352	-3.52837	-2.49688	-2.43742	-2.01304
YGR074W	SMD1	TFIID	19.1426	1743	-0.102293	-0.00825077	0.0507987	-1.43017	-0.753294	-0.34487	-2.22677	-1.96461	-1.73948	-2.38095
YJL129C	TRK1	TFIID	19.1425	1744	-0.0345653	0.105772	-0.117749	-1.54605	-1.27827	-0.805826	-1.81119	-1.94446	-2.06556	-1.8002
YHR090C	YNG2	TFIID	19.141	1745	-0.191209	0.168356	0.263348	-1.44614	-0.744026	-0.191762	-1.75567	-1.83573	-1.97723	-2.01575
YHR152W	SPO12	TFIID	19.1387	1746	-0.240817	-0.232995	-0.163755	-1.49643	-1.56011	-0.644468	-3.27535	-2.62167	-2.50792	-2.81764
YGL039W	YGL039W	TFIID	19.1217	1747	-0.156541	-0.304983	-0.00461518	-0.478115	0.196352	0.54415	-3.28913	-2.23577	-1.73882	-2.14163
YKL099C	UTP11	TFIID	19.1145	1748	-0.265481	0.406373	0.238768	-0.994628	-1.25294	-0.840733	-2.65835	-2.57936	-2.54777	-2.14567
YOL030W	GAS5	CR	19.1055	1749	0.00453004	0.130283	-0.184541	-1.4137	-1.07881	-0.56904	-1.2245	-1.33653	-1.17288	-1.12284
YIL031W	ULP2	TFIID	19.1005	1750	-0.0255351	0.0566119	0.131189	-2.16089	-0.90468	-0.450661	-1.84806	-1.74729	-2.0563	-1.64766
YBR058C-A	TSC3	TFIID	19.0862	1751	-0.190368	0.295279	-0.124098	-1.39797	-1.04576	-0.575089	-2.4509	-2.52894	-1.51792	-1.62468
YPL189C-A	COA2	TFIID	19.0749	1752	0.115136	1.29494	-0.00868902	-0.0249872	0.435377	0.863778	-0.726072	-2.10434	-0.988719	-1.78349
YPL211W	NIP7	TFIID	19.058	1753	-0.223874	0.360121	0.0140373	-0.932306	-1.38565	-1.0867	-2.55131	-2.36033	-1.90165	-2.09634
YLR114C	AVL9	TFIID	19.0543	1754	-0.0218817	0.1937	0.141501	-1.83736	-0.90686	-0.319498	-2.37231	-2.06648	-2.20274	-1.85113
YHR123W	EPT1	TFIID	19.0533	1755	-0.114514	-0.348223	-0.288255	-2.74292	-1.83494	-1.10996	-2.78265	-2.60961	-2.29492	-2.19943
YOR272W	YTM1	TFIID	19.0293	1756	-0.261181	0.284444	0.173902	-0.910639	-1.4274	-0.950549	-2.58453	-2.64018	-2.22632	-2.09798
YPR025C	CCL1	TFIID	19.0214	1757	-0.038936	0.287877	0.261322	-1.14105	-0.931048	-0.612921	-1.75908	-1.92193	-1.72168	-1.99471
YBL033C	RIB1	CR	19.0132	1758	0.148029	-0.64621	-0.734146	-1.74338	-1.94305	-1.72	-1.0108	-0.868269	-0.65868	-1.08923
YGR261C	APL6	TFIID	19.0045	1759	-0.0824294	0.23	0.173484	-1.76366	-0.703906	-0.185909	-2.39354	-2.18194	-2.20092	-2.03965
YLR045C	STU2	TFIID	19.0021	1760	-0.0149602	-0.0386207	-0.227264	-2.34812	-1.43887	-0.660861	-2.24234	-2.27003	-2.22616	-2.12147
YDR161W	YDR161W	TFIID	19.0018	1761	-0.131827	0.362345	0.230024	-0.702471	-1.38535	-1.03349	-2.93781	-2.43095	-2.47076	-2.32166
YKR056W	TRM2	TFIID	19.0018	1762	-0.138114	0.294453	0.431237	-0.634672	-1.1131	-0.744334	-2.25283	-2.36049	-2.23108	-1.95718
YDR189W	SLY1	TFIID	18.9975	1763	-0.158268	0.125277	-0.0105018	-1.69464	-1.17162	-0.63503	-2.39136	-1.92879	-2.0371	-2.14524
YBR151W	APD1	TFIID	18.9847	1764	-0.0402238	-0.0743494	-0.202718	-1.60988	-1.08114	-0.769565	-2.13275	-2.00969	-1.70528	-1.95981
YNR074C	AIF1	CR	18.9684	1765	0.105719	0.00664148	-0.177538	-1.22462	-1.53032	-1.47904	-1.35841	-1.29624	-0.824659	-1.46349
YKL167C	MRP49	TFIID	18.9437	1766	-0.246935	-0.047771	0.201508	-1.73367	-0.998683	-0.744446	-1.8426	-2.38131	-2.12533	-2.24282
YIL129C	TAO3	TFIID	18.933	1767	0.0469863	0.122894	0.0572004	-1.54817	-0.889172	-0.358365	-1.74919	-1.63818	-1.79067	-1.59815
YDR454C	GUK1	TFIID	18.9309	1768	-0.0935182	0.135257	-0.308296	-1.23516	-1.15189	-0.783535	-2.24961	-1.97521	-1.36366	-1.14997
YDL027C	YDL027C	TFIID	18.9236	1769	-0.0477964	-0.0154489	0.0121215	-2.51251	-0.448759	-0.205475	-1.80937	-1.95467	-2.17724	-2.18327
YBR166C	TYR1	TFIID	18.9198	1770	-0.00310019	0.256466	0.0639406	-0.87933	-0.905294	-0.493323	-2.36217	-1.91438	-2.00219	-1.79512
YGL200C	EMP24	TFIID	18.9167	1771	-0.193348	0.066993	-0.164487	-1.77218	-1.25137	-0.826742	-2.5181	-2.22221	-1.47739	-1.70252
YOL158C	ENB1	CR	18.9159	1772	-0.839568	-0.455043	-0.207598	-0.653455	-2.20744	-2.03802	-2.05273	-1.171	-1.07498	-1.64638
YDR297W	SUR2	TFIID	18.9144	1773	-0.513945	-0.527155	-0.428994	-2.28115	-1.40282	-1.40519	-2.73733	-1.47811	-1.4923	-1.54457
YGL187C	COX4	TFIID	18.8855	1774	-0.00697292	0.157771	-0.393602	-1.35413	-0.417874	0.0723217	-1.77207	-1.72375	-1.21819	-1.67439
YDR301W	CFT1	TFIID	18.8775	1775	-0.058038	0.135293	0.0321096	-1.66814	-0.899413	-0.406465	-2.12277	-2.08067	-2.12927	-1.61525
YGR084C	MRP13	TFIID	18.8749	1776	-0.0526252	0.246929	0.0501265	-1.67731	-1.46066	-0.898411	-1.7428	-1.7174	-1.48183	-1.76039
YHR197W	RIX1	TFIID	18.8648	1777	-0.14377	0.316128	0.381757	-0.688933	-1.40725	-0.943682	-2.1636	-2.31939	-2.13405	-1.77347
YNR053C	NOG2	TFIID	18.8631	1778	-0.000178041	0.19167	-0.0851211	-0.105503	-1.3438	-1.11544	-1.60293	-1.70978	-1.64201	-1.52451
YGR008C	STF2	CR	18.8597	1779	0.123163	-0.92521	-1.08557	-3.1422	-0.893028	-1.20008	-0.948995	0.04535	-0.187572	-1.00163
YKR030W	GMH1	TFIID	18.8433	1780	-0.0704249	0.184316	0.0117166	-1.26553	-0.784028	-0.563523	-2.36836	-2.25998	-2.30552	-2.0788
YLR254C	NDL1	TFIID	18.8394	1781	-0.406016	0.117927	0.560931	-1.25714	-0.618552	-0.535185	-2.58019	-0.851465	-1.26168	-1.82505
YDR017C	KCS1	TFIID	18.8267	1782	0.0314918	0.240746	0.135957	-2.15508	-1.64702	-1.08882	-2.66719	-2.64565	-2.42737	-2.1581
YGL094C	PAN2	TFIID	18.8267	1783	-0.0237411	-0.0507299	-0.140982	-1.9996	-1.27752	-0.738364	-2.21146	-2.09577	-2.13383	-2.03088
YNL261W	ORC5	TFIID	18.8218	1784	0.00535821	-0.130776	-0.197781	-1.11797	-1.2676	-0.786079	-1.70731	-1.56594	-1.39691	-1.38317
YBR281C	DUG2	TFIID	18.8172	1785	-0.0213248	-0.0334422	-0.209503	-0.829103	-0.898865	-0.512283	-2.38159	-2.35145	-2.14694	-2.02112
YLR166C	SEC10	TFIID	18.8142	1786	-0.0215011	0.0918965	0.0449978	-1.83825	-0.809095	-0.484926	-2.32439	-2.10567	-2.21735	-2.09445
YEL056W	HAT2	TFIID	18.7969	1787	-0.119322	0.0834373	-0.172018	-1.53857	-1.19088	-0.756874	-2.05175	-1.80082	-1.81338	-1.60463
YJL165C	HAL5	TFIID	18.7968	1788	-0.0336951	0.148657	-0.0336377	-1.906	-1.25004	-0.997089	-1.96191	-1.99508	-2.00026	-1.97794
YOR109W	INP53	TFIID	18.7944	1789	0.0219677	0.184555	-0.0669963	-1.7853	-1.2207	-0.816768	-2.3783	-2.12469	-2.23188	-1.9708
YJL005W	CYR1	TFIID	18.7743	1790	-0.00865521	-0.02727	-0.291161	-2.68475	-1.01115	-0.622834	-2.82348	-2.66087	-2.5938	-2.2858
YPL020C	ULP1	TFIID	18.7682	1791	-0.161442	0.124754	0.227759	-1.24259	-0.632167	-0.040041	-2.26669	-2.00488	-2.05737	-1.93183
YMR001C	CDC5	TFIID	18.7662	1792	-0.0481416	0.127449	0.0401031	-1.76028	-1.28884	-0.756699	-1.39216	-1.81933	-1.77705	-1.30879
YOR035C	SHE4	TFIID	18.7654	1793	-0.017135	0.0934199	0.116017	-1.96967	-0.873576	-0.511573	-2.12717	-1.94637	-2.05283	-1.8511
YCL045C	EMC1	TFIID	18.76	1794	-0.111525	0.239647	-0.0165188	-1.6846	-1.01233	-0.486043	-2.10458	-1.78511	-1.77326	-1.61622
YKL186C	MTR2	TFIID	18.745	1795	-0.0929598	0.187802	0.308268	-0.984872	-1.06954	-0.34427	-2.53484	-2.12785	-2.09579	-2.1872
YPL070W	MUK1	TFIID	18.7405	1796	0.0244305	-0.0858266	-0.00217293	-1.70822	-0.722006	-0.33438	-2.63141	-2.75923	-2.55023	-2.33872
YKR002W	PAP1	TFIID	18.7225	1797	-0.0239534	0.0749895	0.0323734	-1.84001	-0.99269	-0.535899	-2.25688	-2.14279	-2.35702	-2.12601
YBR267W	REI1	TFIID	18.7222	1798	-0.13021	0.278345	0.171918	-0.774373	-1.47085	-1.1162	-2.93303	-2.62924	-2.67853	-2.73962
YBL078C	ATG8	TFIID	18.721	1799	-0.0577181	0.0462711	0.346545	-2.49118	-0.731424	-0.379249	-1.68558	-1.94467	-1.53791	-1.96344
YER175C	TMT1	TFIID	18.7209	1800	-0.366298	-0.423151	-0.0772701	1.05608	-0.730368	-1.08263	-2.28431	-0.810427	-0.901326	-0.888539
YNL027W	CRZ1	TFIID	18.7151	1801	-0.0739013	0.0768441	0.242158	-1.73809	-0.937421	-0.443648	-1.96768	-2.21497	-2.36226	-2.09367
YKR018C	YKR018C	TFIID	18.6958	1802	0.0326967	0.09789	-0.165783	-1.64079	-0.945287	-0.510506	-2.47421	-2.39273	-2.29657	-2.16551
YIL026C	IRR1	TFIID	18.6723	1803	-0.1884	0.0540045	-0.0261668	-2.09328	-1.2062	-0.581921	-2.62971	-2.43211	-2.34747	-2.24474
YBL045C	COR1	TFIID	18.6678	1804	-0.0549623	0.154496	-0.415873	-2.22585	-0.895739	-0.47724	-1.71112	-1.39794	-1.49801	-1.01898
YOR160W	MTR10	TFIID	18.6637	1805	0.0181861	0.0672255	-0.0428895	-1.85713	-1.36502	-0.755856	-2.18677	-1.90834	-2.04359	-1.87456
YJR050W	ISY1	TFIID	18.6622	1806	-0.141525	-0.0190682	0.231242	-1.28773	-0.689109	-0.184175	-3.12482	-2.52701	-2.44754	-2.96712
YJL197W	UBP12	TFIID	18.6614	1807	0.00750802	0.140792	0.0141202	-1.91721	-1.3612	-0.748943	-2.71813	-2.28223	-2.40882	-2.22766
YGR208W	SER2	TFIID	18.6573	1808	-0.335622	0.0537497	-0.171091	-1.31956	-1.31956	-0.852356	-2.45218	-2.52299	-2.216	-2.4156
YCL057W	PRD1	TFIID	18.6544	1809	0.112546	0.011768	-0.373966	-1.81208	-1.31205	-0.776659	-2.0617	-1.96177	-1.72838	-1.82692
YKL130C	SHE2	TFIID	18.6505	1810	-0.135373	0.0252668	-0.166783	-1.92638	-1.37943	-0.767365	-2.49485	-2.68439	-2.42999	-2.45163
YER100W	UBC6	TFIID	18.6334	1811	-0.115811	0.464105	0.103292	-1.28842	-1.0066	-0.463963	-2.43665	-2.12852	-1.70929	-2.23377
YER035W	EDC2	CR	18.6288	1812	0.00739106	-0.49741	-0.386425	-3.2032	-2.84409	-2.4364	-1.03387	-1.488	-0.410602	-1.62124
YGR038W	ORM1	TFIID	18.6193	1813	-0.0601451	0.0183348	0.195018	-1.80187	-1.34938	-0.786657	-1.66983	-1.82456	-1.08688	-1.95286
YNL090W	RHO2	TFIID	18.5964	1814	-0.101485	0.20037	0.288338	-1.76587	-1.24768	-0.723939	-2.35047	-1.93674	-1.78516	-1.9405
YPR104C	FHL1	TFIID	18.5681	1815	-0.0379838	0.135576	0.141141	-1.9294	-1.30083	-0.723349	-1.90729	-2.06389	-2.32399	-2.11351
YLR186W	EMG1	TFIID	18.5653	1816	-0.261033	0.184639	0.0783759	-0.883049	-1.32867	-0.79617	-2.09577	-1.87909	-1.75041	-2.2758
YMR300C	ADE4	TFIID	18.549	1817	-0.0933043	0.0360199	-0.062439	-1.08892	-0.970649	-0.597915	-2.37677	-2.46583	-2.22102	-2.22775
YHR073W	OSH3	TFIID	18.5482	1818	0.0472213	0.175658	-0.0363769	-1.37155	-1.0498	-0.659628	-2.38448	-2.19995	-2.16098	-2.04148
YBR155W	CNS1	TFIID	18.5478	1819	-0.177701	0.106513	0.0371726	-0.416298	-1.53062	-1.25451	-3.06536	-2.75073	-2.58421	-2.51208
YOL133W	HRT1	TFIID	18.5264	1820	-0.279668	-0.0290777	-0.169094	-1.04124	-0.807635	-0.401342	-2.34167	-1.73804	-2.48107	-2.17606
YFL007W	BLM10	TFIID	18.5263	1821	0.130214	0.0790224	-0.135544	-1.69128	-1.39421	-0.848726	-1.9961	-2.10544	-2.22731	-1.78685
YGL040C	HEM2	TFIID	18.521	1822	-0.128115	-0.0792652	-0.148379	-1.26696	-1.05483	-0.521803	-2.57108	-2.24972	-2.39727	-1.87107
YPR020W	ATP20	TFIID	18.5186	1823	-0.162179	0.394218	0.171893	-0.971576	-0.226483	0.00114792	-2.19056	-1.66604	-1.25937	-1.74239
YOR091W	TMA46	TFIID	18.5178	1824	-0.264416	0.20707	0.0744357	-1.16804	-1.613	-1.006	-2.62513	-2.21266	-2.49801	-2.266
YOR108W	LEU9	TFIID	18.5144	1825	-0.100913	0.438037	-0.0566742	-0.55133	-1.18263	-0.841478	-1.97536	-1.50404	-1.1937	-1.41356
YBR212W	NGR1	TFIID	18.5023	1826	0.0913377	-0.0237731	-0.227507	-1.739	-0.956899	-0.415473	-1.76037	-2.22237	-2.13955	-2.17617
YOR217W	RFC1	TFIID	18.486	1827	-0.0181549	0.177554	-0.0724626	-1.65673	-1.13648	-0.496298	-2.54316	-2.32392	-2.26246	-2.17728
YER146W	LSM5	TFIID	18.4816	1828	-0.240755	0.0202627	0.12105	-0.47855	-1.35316	-0.711883	-3.13916	-2.16114	-2.30065	-2.50481
YPL057C	SUR1	CR	18.4489	1829	0.0388075	-0.839315	-0.521053	-2.45155	-2.64923	-2.26874	-0.680128	-0.671563	-0.587045	-1.16471
YAL059W	ECM1	TFIID	18.4401	1830	-0.0407279	0.408644	0.0454595	-0.861203	-1.48491	-0.948115	-3.28071	-2.54574	-2.72465	-2.05811
YOR132W	VPS17	TFIID	18.4378	1831	-0.129903	-0.0227504	0.018992	-2.05748	-1.11115	-0.617679	-2.42539	-1.95605	-2.25331	-2.13987
YJR010C-A	SPC1	TFIID	18.4294	1832	0.0266899	-0.217417	0.0753249	-1.69998	-1.04054	-0.504595	-2.55825	-2.31043	-2.44811	-1.32981
YDL056W	MBP1	TFIID	18.4255	1833	-0.110111	0.229298	0.119401	-1.73339	-1.20966	-0.50251	-1.87767	-1.76826	-2.26526	-2.01749
YGR252W	GCN5	TFIID	18.4193	1834	-0.0792886	0.134464	0.116375	-1.87127	-0.884746	-0.340456	-2.42133	-2.11411	-2.09443	-2.14428
YPL242C	IQG1	TFIID	18.4127	1835	-0.0919001	-0.00974983	0.0218063	-2.1758	-1.17469	-0.563056	-2.42916	-2.14395	-2.14878	-1.90045
YJR011C	YJR011C	TFIID	18.4015	1836	-0.241064	-0.13881	0.148197	-2.01211	-0.647628	-0.494875	-2.50762	-2.92112	-3.09931	-2.69358
YKL128C	PMU1	TFIID	18.3764	1837	-0.214928	-0.275181	-0.429312	-1.60964	-1.82714	-1.62675	-3.09111	-2.24127	-2.29983	-2.1785
YCR067C	SED4	TFIID	18.3756	1838	0.0708722	0.155852	0.0640275	-1.7645	-0.959657	-0.377942	-2.0148	-1.88685	-2.11166	-1.96961
YLR429W	CRN1	TFIID	18.3672	1839	0.00723827	0.105569	0.114884	-1.63006	-1.08953	-0.588803	-2.53954	-1.89383	-1.80371	-1.91472
YJL033W	HCA4	TFIID	18.363	1840	-0.158453	0.482366	0.573448	-0.612615	-1.30903	-0.753227	-2.52421	-2.47009	-2.60867	-2.06668
YFR051C	RET2	TFIID	18.3588	1841	-0.0640723	0.157709	-0.0135381	-1.87827	-1.25139	-0.969527	-2.11319	-1.82098	-1.86955	-1.99755
YJL198W	PHO90	TFIID	18.3558	1842	-0.0856741	0.192767	0.208544	-0.745073	-1.01333	-0.659775	-2.63329	-2.7581	-2.92991	-2.51678
YEL053C	MAK10	TFIID	18.341	1843	0.0085948	0.0436697	-0.0784092	-0.740039	-0.787596	-0.518176	-1.69147	-2.07923	-2.03948	-2.04646
YBL032W	HEK2	TFIID	18.3395	1844	-0.0869764	-0.0349473	-0.128195	-2.31639	-1.66592	-1.15195	-2.29674	-2.09128	-2.35996	-2.04036
YLL001W	DNM1	TFIID	18.3379	1845	0.0100642	0.19771	-0.10884	-1.59634	-0.769688	-0.36611	-1.98457	-2.17502	-2.16331	-2.02645
YIL125W	KGD1	TFIID	18.3279	1846	0.0110816	0.201303	-0.126662	-2.0019	-0.743704	-0.431165	-1.85571	-1.54624	-1.59176	-1.42475
YIL090W	ICE2	TFIID	18.3235	1847	-0.0207586	0.207895	0.101523	-1.08553	-0.946729	-0.758383	-2.20279	-2.25428	-2.16964	-1.96979
YKR072C	SIS2	TFIID	18.3059	1848	-0.00612523	0.246489	0.136553	-1.24367	-1.09494	-0.651837	-2.33135	-2.285	-2.59681	-2.44655
YDR485C	VPS72	TFIID	18.2923	1849	-0.0989898	0.139106	0.217326	-1.48592	-0.750176	-0.301717	-2.10832	-1.71846	-2.04775	-1.90164
YDR494W	RSM28	TFIID	18.2901	1850	0.0662735	0.304325	0.160912	-1.41293	-0.925127	-0.325898	-2.05948	-1.81892	-2.18289	-2.08716
YOR086C	TCB1	TFIID	18.2826	1851	-0.0668682	0.12803	-0.144405	-2.63713	-1.49765	-0.891753	-2.29225	-1.8319	-2.00569	-1.90599
YPR118W	MRI1	TFIID	18.2814	1852	0.0149014	0.00856827	-0.106429	-1.3396	-1.08731	-0.913164	-2.83455	-2.52022	-2.32862	-2.10509
YPR088C	SRP54	TFIID	18.2666	1853	-0.154318	0.248299	0.02188	-1.47422	-1.15232	-0.755884	-2.40099	-1.72954	-1.81923	-1.84854
YDR181C	SAS4	TFIID	18.2203	1854	-0.0945189	0.199314	0.164054	-1.61216	-0.750221	-0.505262	-1.90615	-1.93966	-2.0193	-1.9155
YJR132W	NMD5	TFIID	18.2079	1855	-0.0213295	0.177038	0.0729519	-1.49972	-1.0847	-0.646114	-2.21778	-1.9375	-1.90245	-1.6385
YAL017W	PSK1	TFIID	18.2058	1856	-0.00203533	0.0923182	-0.132355	-2.62233	-1.1239	-0.489565	-2.40816	-1.9166	-1.94996	-2.06992
YGL172W	NUP49	TFIID	18.1922	1857	-0.0539388	0.296204	-0.063048	-1.74134	-1.04655	-0.758119	-2.39564	-1.94456	-2.03681	-1.93893
YPR069C	SPE3	CR	18.1818	1858	-0.263819	-0.248707	-0.12338	-1.57499	-2.35679	-1.70953	-2.11947	-1.08374	-1.27197	-0.999905
YPL081W	RPS9A	TFIID	18.1742	1859	-0.105301	0.183465	0.0309966	-0.576851	-0.996657	-0.833215	-1.31154	-1.56514	-1.34617	-0.983638
YMR261C	TPS3	TFIID	18.1628	1860	0.0247127	-0.0368715	-0.297303	-2.80431	-1.1039	-0.685891	-2.34214	-2.32325	-2.35965	-2.2658
YLR414C	PUN1	CR	18.156	1861	-0.0161586	-0.915401	-0.661102	-2.56398	-2.26004	-1.93267	-1.44857	-0.965956	-0.925823	-1.63708
YNL147W	LSM7	TFIID	18.1511	1862	-0.299282	0.0373534	0.0252826	-1.28439	-1.2404	-0.662691	-2.59888	-2.72296	-2.60509	-2.43442
YHL027W	RIM101	TFIID	18.147	1863	-0.0257528	0.114168	0.103268	-1.27201	-0.986787	-0.683074	-2.09189	-1.86648	-1.90448	-2.00826
YER172C	BRR2	TFIID	18.1412	1864	-0.0237516	0.166055	0.136041	-1.6988	-1.28779	-0.774025	-2.28571	-2.14757	-2.04663	-1.96792
YLR328W	NMA1	TFIID	18.136	1865	-0.0206751	-0.424161	-0.549448	-1.56771	-1.99212	-1.53885	-3.49313	-3.2549	-2.76418	-2.57431
YNL050C	YNL050C	TFIID	18.1181	1866	-0.0848278	0.319346	0.446694	-1.22096	-0.716647	-0.351745	-2.27542	-2.02678	-2.02429	-1.82901
YNL051W	COG5	TFIID	18.1147	1867	-0.0339415	0.156299	0.153477	-1.47946	-0.541881	-0.191904	-1.97516	-2.02797	-2.12471	-2.17865
YNL288W	CAF40	TFIID	18.1125	1868	0.0259224	0.249128	0.00778228	-1.55169	-1.26074	-0.871261	-1.98984	-2.09221	-2.09579	-2.07216
YNL182C	IPI3	TFIID	18.1046	1869	-0.269917	0.238521	0.196728	-1.22097	-1.36289	-1.07289	-2.88787	-2.78575	-2.85742	-2.37658
YPL234C	VMA11	TFIID	18.0816	1870	0.152921	0.133747	-0.181141	-1.33223	-1.01454	-0.756903	-2.73276	-2.04818	-1.8278	-1.88917
YOR273C	TPO4	CR	18.0769	1871	0.0565697	-1.40603	-1.10459	-5.70085	-4.17249	-3.93856	-0.412887	-0.017229	-0.114162	-0.775889
YBL097W	BRN1	TFIID	18.0754	1872	0.0123855	0.0286556	0.206439	-2.24152	-1.10274	-0.436506	-2.39585	-2.05518	-2.49525	-2.02477
YNL238W	KEX2	TFIID	18.0684	1873	0.0148304	0.0523389	-0.0523939	-1.50866	-1.38491	-0.963016	-1.99151	-2.07123	-1.93587	-1.77278
YDR098C	GRX3	TFIID	18.0661	1874	-0.175763	-0.153718	-0.31654	-0.763729	-1.40761	-1.20318	-2.37216	-2.11425	-1.99483	-2.0164
YLR096W	KIN2	TFIID	18.0634	1875	0.00814562	0.0697159	-0.0292916	-1.83186	-1.32904	-0.740282	-1.8429	-1.98963	-2.0338	-1.76794
YOR119C	RIO1	TFIID	18.0559	1876	-0.0997154	0.218881	0.485759	-1.12013	-1.27956	-0.797621	-3.08389	-2.38822	-2.40304	-2.19771
YNL199C	GCR2	TFIID	18.0263	1877	-0.0700838	0.247874	0.129734	-1.46185	-1.37768	-0.831346	-2.47495	-2.31599	-2.33392	-2.16401
YJR062C	NTA1	TFIID	18.0232	1878	-0.0718209	0.137355	0.0143726	-1.59111	-0.758973	-0.299808	-2.07665	-1.67322	-1.79926	-1.88773
YOR211C	MGM1	TFIID	18.0047	1879	0.0770881	0.277832	0.0792522	-1.77575	-0.993221	-0.571399	-2.30902	-1.90298	-2.08665	-1.85252
YFR041C	ERJ5	TFIID	17.9915	1880	-0.0513027	-0.0508329	0.0346546	-2.06503	-1.02354	-0.522739	-2.50724	-2.0919	-1.93369	-1.98736
YFR031C	SMC2	TFIID	17.9897	1881	-0.0329585	0.305855	0.308056	-1.48344	-0.731933	-0.362173	-1.89894	-2.1534	-2.29959	-2.00015
YKR064W	OAF3	TFIID	17.964	1882	-0.0831095	-0.0366553	0.13618	-1.34478	-0.894656	-0.547336	-2.01128	-1.55029	-1.66336	-1.76272
YOR171C	LCB4	TFIID	17.9621	1883	-0.123903	0.281682	0.117903	-1.63542	-0.790277	-0.321311	-2.0816	-1.9494	-1.9457	-1.84096
YIL047C	SYG1	TFIID	17.959	1884	-0.0471651	-0.16137	-0.450302	-0.544856	-0.87244	-0.645492	-2.01738	-2.54114	-2.32658	-2.36174
YPL266W	DIM1	TFIID	17.959	1885	-0.27432	0.284144	0.343128	-0.528546	-1.05383	-0.720911	-3.07539	-2.50837	-2.64375	-1.94595
YEL036C	ANP1	TFIID	17.9147	1886	-0.0614446	0.159681	-0.146276	-1.27124	-1.37948	-0.810998	-2.39621	-2.32662	-2.6354	-2.60029
YMR071C	TVP18	TFIID	17.905	1887	-0.245149	-0.294332	-0.306895	-1.12625	-1.63999	-1.3204	-2.32851	-2.37603	-1.61007	-2.09269
YKL008C	LAC1	CR	17.9047	1888	-0.464772	-0.388303	-0.0910798	-1.5436	-1.86306	-1.38028	-2.40975	-1.30726	-0.707506	-1.14799
YIL147C	SLN1	TFIID	17.9029	1889	-0.0918869	0.190424	0.00961188	-1.55865	-0.741958	-0.327742	-2.37487	-2.20649	-2.25059	-1.92351
YLR095C	IOC2	TFIID	17.8996	1890	-0.0304264	0.119961	0.158002	-1.78402	-1.00804	-0.378319	-2.07743	-1.82955	-2.03898	-1.89876
YPL163C	SVS1	CR	17.899	1891	-0.149409	-0.499566	-0.853594	-2.00041	-2.6481	-1.99893	-0.816967	-0.478152	-0.546008	-1.21546
YLR367W	RPS22B	TFIID	17.8951	1892	-0.0376068	0.161454	0.206283	-0.596666	-1.28345	-0.444541	-2.44116	-1.42306	-1.18983	-1.5463
YNL330C	RPD3	TFIID	17.8936	1893	0.00404003	0.276581	0.047958	-1.62976	-1.0482	-0.532112	-2.17465	-2.15055	-1.97193	-1.80323
YML071C	COG8	TFIID	17.8534	1894	-0.152562	0.45945	0.431871	-1.60478	-0.759151	0.0319018	-2.92336	-2.64382	-3.07632	-2.44797
YBR234C	ARC40	TFIID	17.8396	1895	-0.0817779	-0.016039	-0.0137406	-2.02576	-1.24283	-0.609924	-2.33241	-1.8212	-1.79261	-1.8766
YHR181W	SVP26	TFIID	17.8347	1896	-0.101287	0.0598045	-0.0302355	-1.51974	-0.752834	-0.462189	-2.84337	-2.37616	-2.1108	-2.21962
YMR296C	LCB1	TFIID	17.8249	1897	-0.0818853	0.0123663	-0.117938	-1.67434	-1.66854	-1.26174	-2.42601	-2.55182	-2.36382	-2.15782
YLR073C	RFU1	TFIID	17.8247	1898	-0.123186	0.444439	0.309074	0.0752391	-1.04529	-0.839557	-2.41195	-2.38663	-2.68012	-3.02289
YPR034W	ARP7	TFIID	17.8155	1899	-0.164207	0.221938	0.126752	-1.43671	-1.3692	-0.994934	-2.56342	-1.9733	-2.21254	-2.27037
YJL011C	RPC17	TFIID	17.8114	1900	-0.116693	0.274106	0.0950486	-1.22852	-0.742893	-0.393115	-2.40715	-2.48242	-2.56654	-2.88463
YAR007C	RFA1	TFIID	17.8103	1901	-0.0417886	-0.0340066	-0.149613	-1.97701	-1.47625	-0.869721	-2.36873	-2.36999	-2.44744	-2.31507
YNL062C	GCD10	TFIID	17.8065	1902	-0.129831	0.151762	0.207241	-0.795738	-1.38201	-0.950749	-2.57888	-2.26343	-2.28056	-1.98833
YGL129C	RSM23	TFIID	17.8065	1903	-0.0184812	0.174407	-0.0276191	-1.47507	-0.994555	-0.546263	-2.04053	-1.90314	-1.85657	-2.02327
YGL111W	NSA1	TFIID	17.8055	1904	-0.180879	0.398619	0.186293	-0.849543	-1.15165	-0.828417	-2.68959	-2.51603	-2.54032	-2.10446
YLR278C	YLR278C	TFIID	17.8009	1905	-0.130673	-0.112999	0.149907	-1.57663	-1.36939	-1.00189	-2.65314	-2.09522	-2.34965	-2.18916
YMR304W	UBP15	TFIID	17.7972	1906	0.0446462	-0.0199333	-0.173119	-2.06173	-0.998917	-0.592933	-2.9333	-2.45993	-2.53238	-2.28663
YGR063C	SPT4	TFIID	17.7957	1907	-0.128891	0.159652	-0.0589427	-1.09011	-0.81113	-0.569585	-2.0847	-1.84763	-1.35796	-2.06665
YDR216W	ADR1	TFIID	17.7908	1908	0.133132	-0.262921	-0.440688	-1.60585	-0.684343	-0.138141	-1.57788	-1.20558	-1.34669	-1.1625
YGL178W	MPT5	TFIID	17.7828	1909	0.0799861	0.110573	-0.104165	-1.15693	-0.718987	-0.392824	-1.92629	-1.96611	-2.09858	-1.96752
YHR165C	PRP8	TFIID	17.7755	1910	0.0184273	0.335085	0.244959	-1.45233	-0.950652	-0.432282	-1.70901	-1.54096	-1.68707	-1.42341
YLR138W	NHA1	TFIID	17.7698	1911	-0.0679227	0.0988576	0.0185409	-1.62224	-1.07358	-0.587267	-3.03264	-2.51606	-2.49236	-2.23976
YOL032W	OPI10	TFIID	17.7653	1912	-0.0641065	0.432213	-0.160906	-2.67598	-1.60797	-1.46588	-2.12458	-2.08194	-2.20097	-2.04927
YMR117C	SPC24	TFIID	17.7475	1913	-0.0951075	-0.109623	-0.13186	-2.14883	-1.27164	-0.34599	-1.65449	-1.93704	-2.49831	-2.37558
YBL040C	ERD2	TFIID	17.7456	1914	-0.133113	0.216214	0.0199963	-1.59275	-0.983592	-0.593032	-1.98537	-1.85475	-1.44572	-1.53704
YER111C	SWI4	TFIID	17.7417	1915	-0.063879	0.0992618	0.025824	-1.88912	-0.523529	-0.0571947	-2.58595	-2.24209	-2.54076	-2.14963
YLR454W	FMP27	TFIID	17.7315	1916	-0.0256679	0.127636	-0.0541417	-1.91996	-0.746869	-0.167067	-2.30594	-2.04178	-2.08206	-1.85512
YBR073W	RDH54	TFIID	17.7237	1917	-0.0492034	0.0318657	-0.0467282	-1.54288	-0.908351	-0.279273	-1.63344	-1.20891	-1.30696	-1.2836
YHR118C	ORC6	TFIID	17.7122	1918	0.000142735	-0.0262404	0.00627411	-1.17745	-1.23962	-0.731358	-1.85544	-1.70888	-1.99394	-1.97996
YLR120C	YPS1	TFIID	17.7089	1919	0.0272257	-0.480149	-0.651492	-1.95708	-1.84205	-1.32914	-2.02141	-2.02	-1.76781	-2.02318
YOL013C	HRD1	TFIID	17.7086	1920	0.00361379	-0.0732038	-0.00134713	-1.77584	-0.819767	-0.362564	-2.30809	-2.28743	-2.16989	-2.09673
YMR061W	RNA14	TFIID	17.7064	1921	-0.0675203	0.316494	0.370981	-1.21846	-0.967501	-0.637893	-1.284	-1.38677	-1.32918	-1.30687
YHR146W	CRP1	TFIID	17.7003	1922	-0.289765	-0.142123	-0.0344285	-1.56458	-1.42834	-0.754499	-2.5134	-2.30501	-2.41398	-2.16093
YBL107C	MIX23	TFIID	17.69	1923	-0.119029	0.0555809	0.190711	-1.35483	-0.557494	-0.142433	-3.6104	-2.24108	-2.31601	-2.326
YDR159W	SAC3	TFIID	17.6897	1924	0.03321	0.239213	0.226381	-1.64251	-0.81908	-0.404197	-1.98065	-1.91846	-2.14016	-1.80418
YCR065W	HCM1	CR	17.6646	1925	-0.105616	-0.155852	-0.410966	-1.87222	-1.53817	-0.995234	-1.08331	-0.779069	-0.698733	-1.26371
YGR147C	NAT2	TFIID	17.6598	1926	-0.0393907	0.193259	0.142436	-1.06777	-1.41091	-0.975195	-1.899	-1.72137	-1.81621	-1.96187
YOR150W	MRPL23	TFIID	17.6528	1927	-0.0758221	0.156877	-0.137363	-1.61171	-0.929814	-0.509957	-2.51149	-2.23349	-1.19486	-2.0677
YGL041W-A	YGL041W-A	TFIID	17.6472	1928	-0.17271	0.207467	0.267806	-1.05049	-0.783718	-0.317493	-2.76919	-2.28836	-2.19942	-2.40449
YMR145C	NDE1	CR	17.6372	1929	0.0729758	-0.225692	-1.38632	-1.55044	-2.16296	-1.88465	-0.0135848	-0.213315	-0.284326	-0.825747
YML100W	TSL1	CR	17.6368	1930	0.331818	-1.23706	-1.8684	-5.43902	-2.19984	-1.95129	-0.362849	0.5142	0.330418	-0.467587
YCR069W	CPR4	TFIID	17.6327	1931	-0.115261	-0.0152229	0.0242937	-1.76337	-0.86484	-0.408535	-2.39816	-2.49043	-2.11385	-2.00661
YPL116W	HOS3	TFIID	17.6318	1932	0.0112068	-0.168237	-0.221493	-2.24605	-1.63102	-1.00045	-2.35421	-2.16673	-2.11081	-2.25948
YKL010C	UFD4	TFIID	17.6318	1933	0.00706783	0.184641	-0.00397604	-1.09644	-1.0092	-0.530537	-1.77812	-1.56558	-1.57611	-1.53786
YBR015C	MNN2	TFIID	17.6314	1934	-0.121717	0.0606302	-0.184983	-1.63225	-1.21339	-0.824574	-2.80317	-2.4635	-2.17256	-2.54452
YCR107W	AAD3	TFIID	17.6289	1935	0.128324	-0.216494	-0.331286	-2.11376	-1.10397	-0.860075	-2.21926	-2.06201	-2.24589	-2.28329
YJR143C	PMT4	TFIID	17.617	1936	-0.0559641	0.104785	-0.250658	-1.73529	-1.49259	-0.926235	-2.59325	-1.87626	-1.68118	-1.74571
YPR073C	LTP1	TFIID	17.6076	1937	-0.174673	0.383657	0.395999	-1.06108	-0.482077	-0.415441	-3.55663	-2.36994	-2.05386	-2.03464
YBL090W	MRP21	TFIID	17.6014	1938	-0.0950961	0.239337	0.0517364	-1.22374	-0.866574	-0.639788	-2.39306	-2.74758	-2.18756	-2.01418
YMR016C	SOK2	TFIID	17.5999	1939	-0.134708	-0.126941	0.0589619	-1.3033	-0.9691	-0.62875	-1.7455	-1.06527	-0.935645	-1.40113
YNL111C	CYB5	TFIID	17.5978	1940	-0.241802	0.122962	0.41192	-1.44869	-0.487396	-0.35973	-2.56326	-2.37662	-2.23904	-2.8182
YGR081C	SLX9	TFIID	17.597	1941	-0.16601	0.285347	0.587206	-0.688183	-1.1184	-0.829345	-2.61368	-2.41651	-2.18164	-2.07915
YBR095C	RXT2	TFIID	17.5843	1942	-0.105431	0.153193	0.250686	-1.57118	-1.00252	-0.496913	-2.39218	-2.22969	-2.16877	-1.8236
YDR498C	SEC20	TFIID	17.5823	1943	-0.108089	0.110311	0.203279	-2.16766	-0.915157	-0.327148	-2.28129	-1.93398	-2.29835	-2.18622
YPR141C	KAR3	TFIID	17.5822	1944	-0.0824274	0.0133233	0.0416956	-1.8475	-1.24396	-0.614109	-1.6258	-1.6827	-1.88967	-1.50878
YNR013C	PHO91	TFIID	17.5486	1945	-0.01476	-0.0253719	-0.31803	-1.93897	-1.83715	-1.27753	-2.22616	-2.28078	-2.39712	-2.10222
YML125C	PGA3	TFIID	17.5476	1946	-0.178337	-0.240166	-0.504706	-1.57389	-2.21969	-1.64576	-2.56085	-2.46994	-2.37053	-1.63377
YGL049C	TIF4632	TFIID	17.544	1947	-0.0186679	0.101797	-0.0876335	-2.00959	-0.99666	-0.418991	-2.56873	-2.33723	-2.3772	-2.1737
YLR226W	BUR2	TFIID	17.5393	1948	-0.0409607	-0.00832925	0.127244	-0.906732	-0.844517	-0.638424	-2.44993	-2.35077	-2.4144	-2.05725
YCL001W	RER1	TFIID	17.5316	1949	-0.0984241	0.258688	-0.133878	-1.78351	-1.78082	-1.09649	-2.53663	-2.35124	-1.76423	-2.10891
YPL203W	TPK2	TFIID	17.5303	1950	0.0237473	-0.146405	-0.406142	-3.06701	-1.6628	-1.00739	-1.89133	-2.42052	-2.02616	-2.0374
YHR200W	RPN10	TFIID	17.5253	1951	-0.192133	0.150347	-0.224735	-1.46719	-1.48013	-0.901289	-2.22619	-1.90731	-1.74105	-2.38063
YDR481C	PHO8	TFIID	17.509	1952	-0.201261	0.249507	0.052405	-2.30825	-1.69483	-1.40637	-1.55245	-1.68899	-1.75404	-1.8395
YER029C	SMB1	TFIID	17.5073	1953	-0.205584	0.140409	0.29155	-1.64415	-1.33602	-0.620993	-2.61137	-2.0957	-2.49919	-2.25452
YGL125W	MET13	CR	17.5066	1954	-0.157459	-0.159598	0.0797801	-0.805818	-0.62651	-0.441947	-0.0861705	-0.382745	-0.424598	-0.680919
YDL236W	PHO13	TFIID	17.4899	1955	-0.0312083	0.242439	-0.168798	-1.476	-1.38939	-0.858674	-2.44133	-1.96573	-1.86217	-1.83167
YCL017C	NFS1	TFIID	17.4787	1956	-0.154269	-0.0474969	0.0247221	-1.18359	-1.05127	-0.676603	-2.135	-2.06293	-2.04348	-1.78243
YKR074W	AIM29	TFIID	17.4653	1957	0.139791	-0.0142364	0.0660904	-1.36254	-0.962417	-0.458872	-3.27418	-2.40662	-2.53047	-2.49601
YLR327C	TMA10	CR	17.4549	1958	-0.0096149	-0.982688	-0.349199	-0.118696	-0.642463	-1.4458	-1.86808	-0.550259	-0.231052	-1.23849
YDL166C	FAP7	TFIID	17.4482	1959	-0.244129	0.119363	0.0793312	-1.18682	-1.39775	-0.661539	-2.55843	-2.25889	-1.92686	-2.10651
YBR023C	CHS3	TFIID	17.446	1960	-0.118442	0.07685	-0.34202	-1.36682	-1.18056	-0.722288	-2.43671	-2.41044	-2.32607	-2.16174
YHL038C	CBP2	TFIID	17.432	1961	-0.111759	0.0578848	0.272709	-1.16903	-0.498452	-0.250258	-2.58221	-2.26747	-2.37514	-2.081
YLR373C	VID22	TFIID	17.4062	1962	-0.0417108	-0.0156797	-0.127048	-2.41353	-1.31122	-0.783093	-2.15256	-2.20931	-2.1764	-2.06599
YHR029C	YHI9	TFIID	17.4046	1963	0.0244224	-0.051477	-0.333239	-0.878316	-0.964547	-0.788986	-1.55196	-1.73126	-1.52621	-1.62953
YHL039W	EFM1	TFIID	17.3952	1964	0.0458422	0.149775	0.205171	-0.344352	-0.494476	-0.396613	-2.24705	-2.37833	-2.12653	-2.05683
YDR093W	DNF2	TFIID	17.3952	1965	0.0302482	-0.0270107	-0.22655	-1.81869	-1.3457	-0.965355	-2.73863	-2.46935	-2.47404	-2.00137
YBL017C	PEP1	TFIID	17.3906	1966	-0.0623435	0.0810912	-0.0960363	-1.64756	-1.29498	-0.88477	-2.14403	-1.78106	-1.82862	-1.64624
YLR069C	MEF1	TFIID	17.3846	1967	0.0336967	0.222497	0.0554583	-2.0116	-1.10726	-0.552721	-2.4065	-2.08506	-2.07392	-1.75893
YHR056C	RSC30	TFIID	17.3592	1968	0.0265642	0.0109229	-0.180608	-1.99164	-1.15604	-0.598572	-1.94616	-2.07528	-2.41894	-1.93375
YNL207W	RIO2	TFIID	17.3476	1969	-0.0987028	0.349857	0.360106	-0.854436	-1.05857	-0.844852	-2.60061	-2.13342	-1.9341	-1.85766
YJR054W	KCH1	TFIID	17.3373	1970	-0.0530677	-0.0720531	-0.21629	-1.50465	-0.967053	-0.706722	-2.72082	-2.53281	-2.562	-2.18641
YML110C	COQ5	TFIID	17.3325	1971	-0.121163	0.0102912	-0.211391	-1.9005	-1.45324	-0.691761	-2.55947	-1.85555	-1.60804	-1.91875
YGR136W	LSB1	CR	17.3196	1972	0.0285587	-0.0343621	-0.162296	-2.0829	-1.79536	-1.1797	-1.7256	-1.46316	-1.291	-1.76438
YPR191W	QCR2	TFIID	17.3183	1973	-0.033042	0.364214	-0.377132	-1.37282	-0.389504	-0.121339	-1.95577	-0.990083	-1.10557	-1.07404
YGL073W	HSF1	TFIID	17.3169	1974	0.0293931	0.17513	0.0682558	-1.44143	-1.00804	-0.547233	-2.17705	-1.93152	-2.48995	-2.3293
YPL188W	POS5	TFIID	17.3117	1975	-0.0224523	0.214918	-0.0176196	-0.540493	-0.727847	-0.506522	-2.48352	-2.83138	-2.58721	-2.78387
YGR210C	YGR210C	TFIID	17.2984	1976	-0.00647797	0.372057	0.30309	-1.12304	-1.60154	-1.30635	-2.54447	-2.29119	-2.13149	-2.25874
YHR063C	PAN5	TFIID	17.2944	1977	-0.119569	0.253166	-0.0197436	-1.18929	-0.860741	-0.731619	-2.71229	-2.14994	-2.50612	-1.86069
YML032C	RAD52	TFIID	17.2942	1978	0.120262	0.0805947	-0.0605517	-1.37969	-1.0094	-0.692882	-1.89182	-2.19477	-1.91839	-1.98948
YKR006C	MRPL13	TFIID	17.2927	1979	-0.106275	0.0986251	0.20404	-1.23675	-0.9805	-0.556142	-2.42898	-1.95059	-1.70066	-1.90886
YDR012W	RPL4B	TFIID	17.2896	1980	0.0385263	0.094275	0.0060533	-1.01734	-1.34085	-0.9913	-2.48842	-2.08588	-2.07179	-2.08361
YNR006W	VPS27	TFIID	17.288	1981	-0.0639813	-0.0662301	-0.032378	-1.65675	-0.943662	-0.567882	-2.31742	-2.3848	-2.52323	-2.24812
YOR230W	WTM1	CR	17.2828	1982	-0.131045	-0.4432	-0.960092	-2.2711	-2.21995	-1.97718	-1.92351	-0.443347	-0.562429	-0.699363
YLR419W	YLR419W	TFIID	17.2777	1983	-0.0275551	0.166627	0.252202	-1.40654	-1.22396	-0.605223	-2.15754	-2.21112	-2.31752	-1.77549
YCR043C	YCR043C	TFIID	17.2742	1984	-0.0483752	-0.00944811	-0.191688	-1.76257	-1.36571	-0.866376	-2.59657	-2.1929	-1.89888	-2.0496
YJL072C	PSF2	TFIID	17.2733	1985	-0.131637	0.255267	0.206544	-0.759659	-0.456075	-0.0614621	-1.92866	-2.51898	-2.1327	-2.34342
YIL151C	ESL1	TFIID	17.2721	1986	-0.0249023	0.370905	0.250776	-1.50029	-0.793084	-0.493568	-1.77831	-1.7417	-1.91323	-1.70153
YOL062C	APM4	TFIID	17.2717	1987	-0.00216947	0.0892758	0.00717953	-1.61916	-1.02445	-0.58748	-2.21085	-2.06347	-1.86817	-2.10512
YML081W	TDA9	TFIID	17.2617	1988	-0.0217068	0.0871451	0.0474599	-1.56216	-1.17829	-0.741071	-1.93986	-1.83886	-1.89206	-1.72743
YIL063C	YRB2	TFIID	17.2448	1989	-0.197453	0.186724	0.110389	-1.65245	-0.923702	-0.427361	-2.79242	-2.27003	-2.64403	-2.31454
YDR524C	AGE1	TFIID	17.2367	1990	-0.0138722	0.568783	0.434183	-1.21155	-1.22683	-0.97666	-1.29538	-1.87741	-1.92262	-1.6467
YKL023W	YKL023W	TFIID	17.2256	1991	-0.144201	0.0709147	0.136664	-1.42775	-0.761107	-0.139477	-2.38732	-1.78063	-2.181	-2.36264
YOR299W	BUD7	TFIID	17.2204	1992	0.0378752	0.0449969	-0.0328814	-1.858	-1.3606	-0.961401	-2.43953	-2.55878	-2.31663	-2.28658
YPR115W	RGC1	TFIID	17.2078	1993	0.0662586	0.0204815	-0.312524	-2.13896	-0.940303	-0.443461	-2.13099	-1.45193	-1.59689	-1.28071
YDR244W	PEX5	TFIID	17.2059	1994	-0.0435845	0.0143377	0.0230863	-1.76434	-1.11871	-0.645998	-1.70744	-1.83849	-2.13768	-1.72841
YIL008W	URM1	TFIID	17.1996	1995	-0.3518	0.325662	0.315192	-0.972582	-0.707969	-0.560694	-3.95448	-1.988	-2.67828	-2.11383
YGL036W	YGL036W	TFIID	17.1906	1996	0.134946	0.0928437	-0.13827	-2.17619	-0.570534	-0.286983	-2.36669	-2.47704	-2.77362	-2.3631
YDR531W	CAB1	TFIID	17.1879	1997	-0.0110688	0.0200649	-0.110062	-0.764443	-0.762227	-0.593459	-2.62782	-2.51852	-2.38311	-2.22822
YBL005W	PDR3	TFIID	17.1851	1998	-0.0919355	-0.268398	-0.32573	-1.80979	-1.91592	-1.63592	-2.3194	-2.26439	-2.19729	-2.11877
YPR055W	SEC8	TFIID	17.175	1999	-0.116734	0.109414	0.114306	-1.85887	-1.06071	-0.606628	-1.96463	-1.8121	-1.83884	-1.9048
[truncated: 2,901 more rows]
