# Supplementary material for: Two roles for the yeast transcription coactivator SAGA and a set of genes redundantly regulated by TFIID and SAGA
Source: eLife. 2020 Jan 8;9:e50109. doi: 10.7554/eLife.50109 (PMC6977968; doi:10.7554/eLife.50109)
Supplement: Supplementary file 4. — Data for other strains, results of k-means clustering and average expression per gene are the same as shown in Supplementary file 3. Rows are sorted by the average expression. [file elife-50109-supp4.xlsx]

## Sheet: Supp File 4
gene_id	gene_name	class	expression	expression_rank	Spt3_20	Spt3_7	Taf13	Spt3_Taf13	Spt7_Taf13
YPR036W-A	SPO24	CR	1605.62	1	-0.435624	-0.117938	0.200644	-0.645283	0.288816
YLR109W	AHP1	CR	732.796	2	-1.33489	-0.374501	-0.653262	-1.63848	-0.750808
YHR179W	OYE2	CR	690.266	3	-0.902867	-0.362166	-0.634455	-1.92952	-1.46721
YGR209C	TRX2	CR	604.756	4	-1.05135	-0.825282	0.218668	-1.32692	-0.158865
YOL151W	GRE2	CR	550.24	5	-1.56753	-0.893803	-0.343379	-1.82805	-0.902657
YGR192C	TDH3	CR	550.045	6	-0.719875	-0.540739	-0.459031	-1.97488	-1.62002
YOL109W	ZEO1	CR	542.509	7	-1.85357	-1.50146	-0.470145	-2.22772	-1.36912
YLR110C	CCW12	CR	436.509	8	-0.876246	-0.442795	-0.589609	-2.06285	-1.45475
YDL184C	RPL41A	TFIID	422.926	9	-0.103038	0.185331	-1.92834	-1.77234	-2.14275
YDL133C-A	RPL41B	TFIID	420.731	10	0.0727943	-0.0103405	-1.45186	-1.94983	-2.5166
YDR524C-B	YDR524C-B	CR	409.177	11	-0.913965	-0.410289	-0.611322	-2.18256	-1.46018
YGL008C	PMA1	CR	408.467	12	-1.67529	-0.928085	-1.24371	-2.91285	-2.49899
YPL240C	HSP82	CR	398.202	13	-0.746634	-0.534931	-1.61542	-4.2943	-3.54286
YMR186W	HSC82	CR	383.734	14	-0.607706	-0.319269	-1.28557	-3.26049	-2.37706
YBR244W	GPX2	CR	378.81	15	-1.49125	-1.16647	-0.647078	-2.64134	-1.39476
YNL134C	YNL134C	CR	370.296	16	-0.900622	-0.415455	-0.399621	-2.45537	-0.797641
YHR174W	ENO2	CR	357.248	17	-1.12731	-0.559424	-0.778648	-2.68708	-2.31162
YCR012W	PGK1	CR	346.842	18	-1.32168	-0.862946	-0.320288	-2.86062	-2.27509
YGR142W	BTN2	CR	342.685	19	-0.268852	-0.160191	-2.16389	-4.5622	-3.69966
YML028W	TSA1	CR	335.079	20	-0.85955	-0.373795	-0.458927	-1.01645	-0.769304
YOR298C-A	MBF1	CR	324.496	21	-0.674389	-0.314172	-1.21733	-3.65114	-2.63283
YLR075W	RPL10	CR	318.658	22	-0.320241	0.0876307	-0.873959	-1.54694	-1.65242
YLL024C	SSA2	CR	317.379	23	-1.08219	-0.664105	-1.30496	-3.35911	-2.47034
YKL152C	GPM1	CR	311.268	24	-1.33159	-0.770614	-0.406849	-2.43365	-2.18054
YML131W	YML131W	CR	307.081	25	-1.24415	-1.00211	-0.304261	-2.02021	-1.02851
YCR024C-A	PMP1	CR	295.357	26	-1.02341	-0.782378	-1.71084	-2.66857	-2.50076
YOR153W	PDR5	CR	294.463	27	-1.75765	-1.65137	-1.18222	-4.02959	-2.85792
YPL187W	MF(ALPHA)1	CR	288.694	28	-1.24096	-1.02291	-2.54966	-3.32043	-3.31434
YLR460C	YLR460C	CR	286.623	29	-1.44679	-0.980658	-0.700599	-2.69936	-1.91354
YDR353W	TRR1	CR	280.192	30	-0.684251	-0.469774	-0.289452	-2.77255	-1.34442
YGR055W	MUP1	CR	273.711	31	-1.20604	-0.765691	0.0838767	-1.83536	-0.824127
YJR104C	SOD1	CR	265.484	32	-1.45522	-0.905276	-0.362413	-2.60755	-1.06518
YDR011W	SNQ2	CR	263.237	33	-1.39718	-1.26514	-0.905264	-4.06342	-2.39551
YNL031C	HHT2	CR	252.641	34	-0.774278	-0.339152	-0.643316	-2.83453	-2.43085
YGR155W	CYS4	CR	252.116	35	-1.64184	-1.2543	-0.847603	-3.30687	-1.97477
YKL060C	FBA1	CR	251.879	36	-1.52428	-1.09013	-0.382371	-2.30027	-2.49187
YEL017C-A	PMP2	CR	251.507	37	-1.0544	-0.773911	-1.43559	-3.28002	-3.33881
YAL005C	SSA1	CR	250.882	38	-0.976007	-0.690611	-1.36905	-4.24955	-2.92176
YPL061W	ALD6	CR	249.455	39	-0.867553	-0.662206	-1.02939	-2.5235	-1.69688
YJR045C	SSC1	CR	240.684	40	-0.505277	-0.246038	-1.0319	-3.13896	-2.20028
YAL038W	CDC19	CR	237.015	41	-1.41481	-0.828821	-0.548116	-2.1018	-2.13846
YLL026W	HSP104	CR	228.336	42	-1.21629	-0.754785	-1.83196	-4.62916	-3.84042
YNL030W	HHF2	CR	224.54	43	-0.909544	-0.479658	-0.551182	-2.57864	-2.25793
YBR008C	FLR1	CR	219.549	44	-1.78816	-1.22587	0.194081	-2.31866	-0.785563
YLR249W	YEF3	CR	217.065	45	-0.625751	-0.286781	-1.46449	-2.07686	-2.34495
YDR050C	TPI1	CR	209.999	46	-1.47614	-0.873247	-0.396417	-3.20102	-2.84482
YOR369C	RPS12	TFIID	208.999	47	-0.0744804	0.143565	-2.24994	-1.90646	-2.05789
YGR234W	YHB1	CR	208.545	48	-2.31902	-1.42689	-0.280527	-2.32753	-2.06263
YER091C	MET6	CR	207.503	49	-1.8284	-1.26948	-0.104678	-2.07718	-2.59197
YJL034W	KAR2	CR	197.429	50	-0.803175	-0.534255	-1.35248	-3.33794	-2.52864
YLR355C	ILV5	CR	192.207	51	-0.680704	-0.274351	-0.666107	-2.40138	-2.28971
YCL026C-A	FRM2	CR	185.836	52	-1.28837	-1.08593	-0.89866	-2.97994	-1.64886
YIL053W	GPP1	CR	185.484	53	-1.40135	-1.31166	-0.815931	-3.18838	-4.29659
YDR224C	HTB1	CR	184.403	54	-0.784363	-0.446571	-1.24551	-2.35376	-2.4855
YDR225W	HTA1	CR	182.733	55	-0.76328	-0.469977	-1.09786	-2.62214	-2.6327
YLR044C	PDC1	CR	181.864	56	-1.22887	-0.773388	-0.455741	-1.38693	-1.69571
YLR325C	RPL38	TFIID	180.674	57	-0.212904	0.0382266	-2.58764	-2.02282	-2.3776
YLR108C	YLR108C	CR	180.476	58	-0.570951	-0.442662	-0.330002	-3.47327	-1.9051
YJR123W	RPS5	TFIID	180.228	59	-0.248805	-0.0648617	-2.37708	-2.08048	-2.14007
YNL178W	RPS3	TFIID	180.052	60	-0.362059	0.0906211	-2.7123	-1.84266	-2.11711
YLR167W	RPS31	TFIID	179.196	61	-0.175561	0.100617	-2.48053	-1.97525	-2.35603
YNL007C	SIS1	CR	177.849	62	-0.385048	-0.19703	-1.4906	-3.67529	-3.0808
YBR009C	HHF1	CR	176.935	63	-1.26068	-0.719247	-0.960473	-2.20167	-2.782
YHL015W	RPS20	TFIID	175.724	64	-0.330731	-0.123066	-2.58611	-2.01701	-2.15582
YBR101C	FES1	TFIID	172.692	65	-0.130372	0.145893	-1.69923	-2.9329	-2.76052
YNL064C	YDJ1	TFIID	172.267	66	-0.305352	0.0333981	-1.62686	-2.70934	-2.7283
YOR020C	HSP10	TFIID	165.373	67	-0.161454	0.258	-2.32279	-2.88034	-2.79243
YDL081C	RPP1A	TFIID	165.057	68	-0.338828	0.0228181	-2.35563	-1.93384	-2.00641
YBL002W	HTB2	CR	162.427	69	-1.20116	-0.635005	-0.485065	-3.07238	-2.5505
YEL009C	GCN4	CR	157.785	70	-0.169095	-0.0324076	-0.780671	-2.07371	-1.59788
YOR027W	STI1	CR	157.598	71	-1.01477	-0.424392	-2.01716	-3.74772	-3.99102
YHR055C	CUP1-2	CR	157.103	72	0.469146	-0.0381187	-0.0311196	-1.13985	-0.343555
YDL124W	YDL124W	CR	156.423	73	-2.28638	-2.20084	-0.657102	-3.29514	-3.36749
YDL055C	PSA1	CR	153.993	74	-1.43413	-0.965394	-0.689088	-2.99575	-2.36381
YEL034W	HYP2	CR	153.263	75	-1.19753	-0.561541	-0.931911	-2.97031	-2.92637
YBR010W	HHT1	CR	153.228	76	-0.706708	-0.36909	-0.920461	-2.78955	-3.05411
YPL106C	SSE1	TFIID	152.571	77	-0.243764	0.145214	-2.20136	-3.17084	-3.2391
YEL071W	DLD3	CR	151.867	78	-1.57304	-1.1258	-0.442261	-1.9742	-1.03358
YAL003W	EFB1	CR	150.864	79	-0.881632	-0.162158	-1.88683	-3.33716	-2.95635
YMR058W	FET3	CR	150.834	80	-1.53651	-0.811915	-0.526031	-2.1965	-1.21901
YDR382W	RPP2B	TFIID	150.718	81	-0.246425	-0.0247859	-2.27078	-2.27192	-2.25568
YCR005C	CIT2	CR	150.337	82	-1.22585	-0.734907	0.00466641	-1.67239	-0.539422
YEL046C	GLY1	CR	150.286	83	-1.20421	-0.589313	-0.743392	-2.92594	-1.85909
YLR441C	RPS1A	TFIID	149.781	84	-0.272934	-0.0862712	-2.30226	-1.81041	-2.07741
YOL086C	ADH1	CR	149.345	85	-2.19317	-1.27239	-0.597681	-2.44452	-2.33479
YMR318C	ADH6	CR	146.363	86	-1.41934	-0.737823	-1.2735	-2.53948	-2.82826
YPR149W	NCE102	CR	146.055	87	-0.938725	-0.941867	-0.871651	-3.54635	-3.08309
YKL096W-A	CWP2	CR	145.242	88	-1.69731	-1.11437	-1.1228	-2.82982	-2.87732
YKL056C	TMA19	CR	142.595	89	-0.630516	-0.480498	-1.5235	-2.3219	-2.74182
YCR024C-B	YCR024C-B	CR	139.909	90	-0.987019	-0.621608	-1.73901	-2.84973	-2.73375
YGL253W	HXK2	CR	136.334	91	-0.758009	-0.50292	-1.0187	-2.78517	-2.54435
YLR259C	HSP60	TFIID	136.203	92	-0.321219	-0.0414992	-1.82383	-3.24214	-2.9729
YPL131W	RPL5	TFIID	132.503	93	-0.50715	-0.0692841	-2.55373	-2.22655	-2.45326
YBL003C	HTA2	CR	130.675	94	-1.23881	-0.76053	-0.596777	-2.13747	-2.22875
YOR063W	RPL3	CR	130.16	95	-0.57734	-0.148956	-1.48086	-1.97964	-2.41045
YDL020C	RPN4	CR	125.6	96	0.50794	0.332209	0.347336	-0.86875	-0.495065
YNL231C	PDR16	CR	123.717	97	-1.44522	-1.15579	-0.187607	-2.54957	-1.52874
YHR162W	MPC2	CR	122.019	98	-0.733023	-0.655795	-0.878903	-2.74282	-2.1711
YCL026C-B	HBN1	CR	121.064	99	-1.2047	-0.810593	0.00585849	-1.74864	-1.25976
YOL039W	RPP2A	TFIID	120.244	100	-0.48622	-0.096151	-2.85412	-2.33321	-2.59558
YKL081W	TEF4	CR	118.852	101	-0.338338	0.087771	-1.73475	-1.99495	-2.1598
YDL061C	RPS29B	TFIID	118.42	102	-0.222121	-0.272666	-2.2331	-2.09163	-2.06344
YJL101C	GSH1	CR	117.679	103	-0.998478	-0.647929	-0.58204	-2.90892	-2.61721
YJL190C	RPS22A	TFIID	117.11	104	-0.232981	-0.152958	-2.48791	-2.27235	-2.42982
YLR216C	CPR6	TFIID	116.195	105	-0.380224	-0.126757	-2.03503	-3.74104	-3.3523
YLR029C	RPL15A	TFIID	115.988	106	-0.403151	0.0183811	-2.9027	-1.98985	-2.32762
YKR071C	DRE2	CR	115.818	107	-0.458539	-0.00555427	-0.782425	-2.29522	-2.11284
YOR302W	YOR302W	CR	115.526	108	-1.16788	-1.15985	-0.240983	-2.34678	-1.27576
YDR502C	SAM2	CR	114.83	109	-1.80293	-1.1782	-0.886919	-3.06347	-3.31936
YDR033W	MRH1	CR	114.772	110	-2.47575	-1.97867	-0.781057	-3.29501	-3.77074
YPR065W	ROX1	CR	113.602	111	-0.652846	-0.520366	-0.199226	-1.7209	-0.557306
YLR340W	RPP0	TFIID	113.421	112	-0.366052	-0.0102011	-2.28194	-1.73957	-2.08635
YLR264W	RPS28B	TFIID	111.939	113	-0.0888762	-0.118165	-2.38597	-2.16014	-2.42137
YER131W	RPS26B	TFIID	111.735	114	-0.242112	-0.141217	-2.76439	-2.37082	-2.8035
YBL092W	RPL32	TFIID	111.405	115	-0.277301	0.0403437	-2.52869	-2.49934	-2.44021
YJR009C	TDH2	CR	110.337	116	-1.72121	-1.46242	0.301118	-2.61172	-2.64287
YDR135C	YCF1	CR	108.314	117	-0.46584	-0.451515	-0.281456	-2.29757	-1.91012
YPL250C	ICY2	CR	106.919	118	-0.653147	-0.296734	-0.323886	-1.71943	-0.48787
YML063W	RPS1B	TFIID	106.714	119	-0.313028	-0.133987	-2.54922	-2.5056	-2.64841
YCR102C	YCR102C	CR	106.068	120	-2.03185	-1.42554	-0.776427	-3.0578	-2.50863
YGL255W	ZRT1	CR	105.848	121	-1.95582	-1.35578	-0.911255	-3.50681	-1.9416
YAL012W	CYS3	CR	105.723	122	-1.2348	-0.691426	-0.659823	-2.65382	-1.75658
YBR196C	PGI1	CR	105.328	123	-0.786111	-0.269135	-0.844086	-2.11193	-2.3295
YGR027C	RPS25A	TFIID	105.297	124	-0.330375	0.0222814	-2.38471	-1.7915	-2.01421
YER043C	SAH1	CR	105.153	125	-0.697738	-0.351485	-2.10715	-2.71832	-2.9378
YMR251W-A	HOR7	CR	104.822	126	-1.30543	-0.675693	-0.481433	-2.67131	-2.11742
YML116W	ATR1	CR	104.576	127	-0.798545	-0.526156	-0.546457	-2.89159	-2.40989
YJL159W	HSP150	CR	104.183	128	-0.835459	-0.328919	-0.526097	-1.65034	-1.39887
YGL123W	RPS2	TFIID	103.652	129	-0.369749	-0.018302	-2.43082	-2.26299	-2.39414
YBR078W	ECM33	CR	103.292	130	-1.14937	-0.753059	-1.00125	-2.91318	-2.90388
YEL054C	RPL12A	TFIID	102.41	131	-0.245505	-0.0445484	-3.0894	-2.56584	-2.82862
YGL189C	RPS26A	TFIID	101.88	132	-0.421487	-0.141722	-2.27726	-2.29342	-2.32395
YER177W	BMH1	CR	101.302	133	-1.38619	-0.586666	-1.09471	-3.27016	-3.57724
YBR068C	BAP2	CR	100.821	134	-0.665532	-0.34812	-0.0734036	-1.94545	-0.791811
YHR143W	DSE2	CR	100.425	135	-1.34382	-0.691539	-0.366149	-2.33492	-0.966927
YHR071W	PCL5	CR	100.389	136	-1.37225	-1.33423	-0.516625	-2.93915	-2.05096
YHR018C	ARG4	CR	100.098	137	-0.241131	0.0652473	-0.948671	-1.81405	-1.30165
YOR052C	TMC1	CR	100.054	138	-0.369852	-0.544825	-0.207955	-2.91027	-3.46106
YGR157W	CHO2	CR	100.015	139	-0.402678	0.0402532	-0.96278	-3.13132	-2.33255
YGR148C	RPL24B	TFIID	99.8962	140	-0.215962	-0.173342	-2.84434	-2.52028	-2.77386
YOR167C	RPS28A	TFIID	97.8907	141	-0.217089	0.219805	-2.44119	-1.99656	-1.82959
YML130C	ERO1	CR	97.6653	142	-0.429155	-0.333837	-1.58369	-2.47918	-2.95742
YDR258C	HSP78	TFIID	97.0459	143	-0.828383	-0.666813	-1.94198	-4.43874	-3.39461
YMR307W	GAS1	CR	96.3658	144	-1.16998	-0.763688	-1.33763	-3.3556	-2.94276
YLR286C	CTS1	CR	96.2365	145	-2.34289	-1.52235	-0.514751	-2.77966	-2.12795
YHL033C	RPL8A	TFIID	96.1265	146	-0.319962	0.0263032	-1.73821	-2.3164	-2.72672
YHR072W-A	NOP10	TFIID	95.6929	147	0.0184282	0.0822771	-2.56972	-1.80179	-1.93753
YDR418W	RPL12B	TFIID	95.091	148	-0.418713	-0.196316	-2.85134	-2.54726	-2.6169
YHR005C-A	TIM10	TFIID	93.1628	149	-0.115417	-0.0308843	-3.17483	-2.55378	-2.83087
YFL039C	ACT1	TFIID	92.5367	150	-0.367253	-0.070516	-1.97644	-3.17335	-3.36853
YDR513W	GRX2	CR	91.7493	151	-0.315677	-0.262213	-0.879528	-2.8813	-2.36542
YDL192W	ARF1	TFIID	91.176	152	-0.334549	-0.290795	-2.42944	-1.99303	-2.10817
YER145C	FTR1	CR	90.9382	153	-1.40874	-0.96878	-0.819502	-3.28663	-2.04649
YGL089C	MF(ALPHA)2	CR	89.3796	154	-1.30343	-1.58327	-3.38773	-4.65982	-4.51446
YDR037W	KRS1	CR	88.9398	155	-0.528166	-0.326027	-1.82057	-2.56367	-2.49424
YDR132C	YDR132C	CR	88.8416	156	-0.585873	-0.262494	-0.6888	-2.75841	-2.47175
YDL147W	RPN5	TFIID	88.2198	157	-0.199519	-0.168897	-1.94146	-1.93975	-2.00299
YLR333C	RPS25B	TFIID	87.8905	158	-0.238015	-0.211486	-2.93606	-2.35283	-2.92896
YOR198C	BFR1	TFIID	87.4763	159	-0.239887	-0.121507	-1.99274	-1.99905	-2.07705
YPR145W	ASN1	CR	87.3877	160	-0.257542	-0.250784	-1.06844	-2.99515	-1.81631
YGR211W	ZPR1	TFIID	87.2756	161	-0.460702	0.00210044	-1.83531	-3.01055	-2.80425
YER052C	HOM3	CR	87.1422	162	-0.213667	0.0704796	-1.12423	-2.49232	-2.33152
YLR197W	NOP56	TFIID	86.9907	163	-0.194091	0.00211632	-2.87443	-1.9905	-2.08692
YPR080W	TEF1	CR	86.2436	164	-0.218428	0.0418426	-1.33336	-2.67004	-2.1058
YKR042W	UTH1	CR	85.532	165	-1.60851	-0.94986	-0.890577	-2.35143	-1.30247
YML123C	PHO84	CR	85.3764	166	-0.128027	-0.979018	-1.10233	-2.54029	-2.73667
YER124C	DSE1	CR	85.2327	167	-0.769508	-0.481571	-0.493458	-1.84028	-1.13601
YBR118W	TEF2	CR	84.8821	168	0.0545974	0.124395	-1.17936	-2.47375	-1.99789
YOL040C	RPS15	TFIID	84.7745	169	-0.357185	-0.0131982	-2.57882	-2.42947	-2.49632
YLR293C	GSP1	TFIID	84.5577	170	-0.455763	-0.167867	-2.51047	-2.20838	-2.38207
YEL027W	VMA3	TFIID	84.2145	171	-0.600897	-0.197672	-2.60314	-2.13174	-2.35784
YLR304C	ACO1	CR	84.0657	172	-2.09089	-1.17128	0.434588	-2.0617	-0.637864
YGR282C	BGL2	TFIID	83.6392	173	-0.87877	-0.473923	-1.81624	-2.49581	-2.85443
YDL229W	SSB1	TFIID	83.1201	174	-0.460323	-0.0742086	-2.15302	-2.35517	-2.61424
YKL216W	URA1	CR	83.0541	175	-0.274583	-0.0431319	-1.14813	-2.31559	-2.5683
YDR099W	BMH2	TFIID	83.0249	176	-0.184258	-0.05653	-2.04205	-2.18766	-2.16149
YBR025C	OLA1	TFIID	82.7597	177	-0.334787	0.132584	-2.75287	-2.2297	-2.47737
YGR169C-A	LSO2	TFIID	82.754	178	-0.229048	0.0147254	-2.21844	-2.23879	-2.31827
YKL068W-A	YKL068W-A	CR	82.4073	179	-0.799459	-1.03634	-0.310666	-2.19468	-2.61566
YPL237W	SUI3	TFIID	82.2523	180	-0.221887	-0.0988407	-2.58424	-2.20517	-1.97197
YDR002W	YRB1	TFIID	82.0467	181	-0.47132	-0.270875	-2.31397	-2.21326	-2.46432
YDL182W	LYS20	CR	81.7164	182	-1.16102	-0.838142	-0.189987	-2.40898	-1.2073
YGL031C	RPL24A	TFIID	80.7393	183	-0.329597	-0.139183	-2.93984	-2.9407	-2.99864
YMR309C	NIP1	TFIID	80.4077	184	-0.242201	-0.0307455	-2.23687	-2.04368	-2.00273
YLL060C	GTT2	CR	80.0647	185	-1.4363	-1.32562	-0.471478	-3.52332	-2.73468
YDR086C	SSS1	TFIID	79.5043	186	-0.16747	0.0415297	-2.62504	-2.4266	-2.35202
YDR276C	PMP3	CR	79.2983	187	-1.25449	-1.0814	-1.0294	-3.35928	-3.01839
YDR533C	HSP31	CR	79.0106	188	-2.22941	-1.43324	-0.495815	-2.94048	-2.43275
YDR497C	ITR1	CR	78.9268	189	-0.895084	-0.817407	-1.50446	-3.37128	-3.49888
YLL045C	RPL8B	TFIID	78.9013	190	-0.248844	0.0547562	-2.61259	-2.17313	-2.23788
YLR214W	FRE1	CR	78.544	191	-1.55841	-0.737031	-1.15566	-2.7612	-1.83381
YDR155C	CPR1	CR	77.458	192	-0.77675	-0.348814	-1.26892	-2.82928	-2.45286
YDR171W	HSP42	CR	76.6874	193	-0.437779	-0.234542	-1.55545	-5.07143	-3.65733
YLR150W	STM1	TFIID	76.5848	194	-0.334902	0.035445	-2.57487	-2.46701	-2.55289
YOR007C	SGT2	TFIID	76.436	195	-0.197767	0.105562	-2.15065	-3.31619	-3.21904
YDR363W-A	SEM1	TFIID	75.5557	196	-0.0961429	-0.091446	-2.53926	-2.96757	-2.68671
YDL232W	OST4	TFIID	75.2511	197	-0.359397	0.0368204	-2.08777	-2.19035	-1.87193
YGL054C	ERV14	TFIID	75.0648	198	-0.479193	-0.032266	-2.64832	-2.46201	-2.6697
YNL209W	SSB2	TFIID	74.5681	199	-0.434537	0.0225333	-2.61486	-1.987	-2.07258
YNL067W	RPL9B	TFIID	74.5338	200	-0.0379961	-0.0149368	-1.64482	-1.86978	-2.25337
YOR136W	IDH2	CR	74.4276	201	-1.41694	-1.00683	0.270581	-2.7297	-1.26984
YNL036W	NCE103	CR	74.3026	202	-1.62494	-1.3222	-0.199069	-4.1425	-4.11998
YJR007W	SUI2	TFIID	74.2161	203	-0.201977	-0.0279907	-2.19744	-1.86691	-1.91493
YPL037C	EGD1	TFIID	73.9562	204	-0.139058	0.0464852	-2.67862	-2.15272	-2.08419
YIL138C	TPM2	TFIID	73.7118	205	-0.0539514	0.340165	-2.44629	-2.55275	-2.11562
YOL139C	CDC33	TFIID	73.6055	206	-0.139729	0.0102956	-2.3389	-1.84724	-1.79194
YPR165W	RHO1	TFIID	73.1174	207	-0.370023	-0.149765	-2.25911	-2.17027	-2.21878
YBR143C	SUP45	TFIID	73.0813	208	-0.167843	0.0703219	-2.53847	-2.14362	-2.18627
YDR345C	HXT3	CR	72.5823	209	-1.50444	-1.35311	-1.00918	-2.69877	-2.68926
YPR035W	GLN1	CR	72.367	210	-0.422111	-0.0260272	-1.32018	-1.44534	-1.61292
YNL281W	HCH1	TFIID	72.2492	211	-0.401983	0.2633	-1.68478	-2.45292	-2.3876
YER165W	PAB1	TFIID	72.1428	212	-0.362164	-0.0430789	-2.72171	-2.10145	-2.19948
YNL244C	SUI1	TFIID	71.4351	213	0.0873693	0.167225	-2.39821	-2.34354	-2.57571
YDL084W	SUB2	TFIID	70.7871	214	-0.238961	0.0740245	-2.12923	-2.02092	-1.85242
YMR038C	CCS1	CR	70.6318	215	-1.21015	-0.835946	-1.23972	-3.33748	-2.40878
YNL069C	RPL16B	TFIID	70.3635	216	-0.248911	-0.0166582	-2.60132	-2.06926	-2.20732
YBR082C	UBC4	TFIID	70.1835	217	-0.360525	0.0164362	-2.10094	-2.7854	-2.96775
YBR079C	RPG1	TFIID	70.1096	218	-0.281756	0.00694591	-2.17216	-1.91207	-1.92931
YOR226C	ISU2	CR	70.0025	219	-1.05467	-0.725763	-0.649037	-2.39568	-1.35673
YLR043C	TRX1	TFIID	69.9705	220	-0.342406	-0.166425	-2.79054	-2.03852	-1.9252
YPL091W	GLR1	CR	69.9552	221	-0.667376	-0.566215	-1.16889	-2.53131	-2.75065
YOR383C	FIT3	CR	69.9197	222	-1.10947	-0.46993	-1.12672	-1.20981	-1.22374
YMR260C	TIF11	TFIID	69.8208	223	-0.158308	-0.00567806	-2.74626	-2.0262	-2.07606
YGL135W	RPL1B	TFIID	69.6447	224	-0.243797	-0.144941	-2.95344	-2.2348	-2.65737
YOR344C	TYE7	CR	69.5083	225	-0.308382	-0.646948	-0.504116	-3.19768	-3.4456
YJR109C	CPA2	CR	69.4964	226	-0.0688189	0.128517	-0.679894	-2.26484	-1.50837
YKL172W	EBP2	TFIID	69.2911	227	-0.124445	0.141923	-2.78174	-1.84217	-1.72803
YGR240C	PFK1	CR	69.1595	228	-0.982218	-0.625182	-1.4593	-2.92023	-3.62017
YNL255C	GIS2	TFIID	69.1051	229	-0.107873	0.0743579	-2.32267	-1.89079	-1.71326
YPR158W	CUR1	TFIID	69.0953	230	-0.132466	0.15702	-1.96786	-3.0528	-2.94332
YBR189W	RPS9B	TFIID	69.0109	231	-0.251735	-0.167109	-2.23081	-1.7107	-1.99137
YPL225W	YPL225W	TFIID	68.9535	232	-0.0227812	0.0669283	-2.24002	-1.70887	-1.45364
YNL327W	EGT2	CR	68.8723	233	-1.2579	-0.540072	-0.331408	-2.16753	-1.22524
YGR085C	RPL11B	TFIID	68.1945	234	-0.35576	-0.0483828	-2.45577	-1.77493	-2.06231
YKL182W	FAS1	CR	67.5725	235	-0.9941	-0.781747	-1.29797	-2.92979	-2.7178
YAL035W	FUN12	TFIID	67.2435	236	-0.262448	0.137877	-2.15466	-1.91133	-1.78687
YHR008C	SOD2	CR	67.0117	237	-1.05349	-0.788236	-0.658286	-2.66624	-2.8645
YER036C	ARB1	TFIID	66.684	238	-0.528389	-0.181484	-3.12045	-2.73068	-3.10464
YLR346C	YLR346C	CR	66.4489	239	-1.33547	-1.76251	-0.542515	-4.19606	-2.86386
YBR085C-A	YBR085C-A	CR	66.4336	240	-1.23236	-1.45296	-1.76343	-4.1905	-4.82942
YLR300W	EXG1	CR	65.9487	241	-2.41955	-2.03283	-0.945928	-3.20103	-2.81928
YER048W-A	ISD11	TFIID	65.8733	242	0.136698	-0.0445411	-1.95029	-2.13922	-2.17696
YOR096W	RPS7A	TFIID	65.8363	243	-0.100982	-0.0520218	-2.27493	-2.4782	-2.51199
YMR116C	ASC1	TFIID	65.5432	244	-0.438364	-0.123674	-3.08062	-2.91955	-2.92798
YOR210W	RPB10	TFIID	65.2448	245	-0.0684734	-0.048213	-2.44212	-1.95988	-1.8822
YPL231W	FAS2	CR	65.0179	246	-1.0014	-0.677107	-1.70215	-2.84443	-3.14223
YDR194C	MSS116	TFIID	64.6723	247	-0.063277	0.118108	-1.42179	-2.06813	-1.99056
YKL043W	PHD1	CR	64.631	248	-1.24639	-0.891811	-0.21804	-1.10261	0.0442304
YDL168W	SFA1	CR	64.3543	249	-0.851101	-0.770999	-1.09334	-3.07916	-3.08505
YML091C	RPM2	CR	64.2737	250	-0.53753	-0.514771	0.171129	-2.49448	-1.56714
YER021W	RPN3	TFIID	64.0937	251	-0.298235	-0.252018	-2.16341	-2.35146	-2.36967
YNL079C	TPM1	TFIID	63.8203	252	-0.26253	0.0270964	-2.5703	-1.97137	-2.03921
YGL028C	SCW11	CR	63.7065	253	-0.7852	-0.339738	-0.436401	-1.66205	-0.994049
YCL050C	APA1	TFIID	63.3754	254	-0.227549	0.0705294	-2.95525	-2.70512	-2.57034
YOR204W	DED1	CR	63.3389	255	-0.586869	-0.277793	-1.45991	-3.56358	-3.15056
YPL135W	ISU1	CR	62.7801	256	-1.04248	-0.567693	-0.125424	-2.02387	-1.44809
YNL131W	TOM22	TFIID	62.3151	257	-0.0993594	0.0611479	-2.15575	-1.79455	-1.72659
YML106W	URA5	TFIID	62.2444	258	-0.2027	0.0716562	-2.29129	-1.92957	-2.07518
YHR193C	EGD2	TFIID	62.0771	259	-0.554136	-0.0196569	-2.85922	-2.14973	-2.06318
YOL127W	RPL25	TFIID	62.0679	260	-0.336383	-0.120558	-2.51021	-2.15973	-2.32336
YLR372W	ELO3	TFIID	61.6883	261	-0.766628	-0.237827	-2.67996	-2.91408	-3.08363
YOR382W	FIT2	CR	61.6694	262	-1.92224	-1.13544	-1.53656	-2.55367	-1.75273
YGR118W	RPS23A	TFIID	61.578	263	-0.489174	-0.175966	-3.41151	-2.78501	-3.05853
YKL164C	PIR1	CR	61.5158	264	-1.1435	-0.289548	-0.472416	-1.41466	-1.05604
YLR048W	RPS0B	TFIID	61.4893	265	-0.406459	-0.0685273	-2.68809	-2.42735	-2.52068
YHR082C	KSP1	TFIID	61.3711	266	-0.364125	0.0247146	-2.29923	-3.06329	-2.91644
YLR175W	CBF5	TFIID	61.3347	267	-0.374228	0.0566611	-2.96358	-2.47645	-2.54713
YGR254W	ENO1	CR	61.2951	268	-2.37401	-1.63357	0.354149	-3.13279	-3.72125
YGR159C	NSR1	TFIID	61.2732	269	-0.373608	-0.144216	-2.06466	-1.91649	-2.59042
YCR021C	HSP30	CR	61.1662	270	-1.59431	-1.13498	-0.750599	-3.21783	-2.351
YEL040W	UTR2	CR	60.9792	271	-1.25437	-0.77862	-1.15634	-1.70412	-0.971132
YKL082C	RRP14	TFIID	60.9624	272	-0.127746	0.139434	-2.39362	-1.82372	-1.75051
YBR109C	CMD1	TFIID	60.9085	273	-0.178512	-0.10749	-2.05792	-1.93298	-1.77126
YNL287W	SEC21	TFIID	60.8467	274	-0.30841	-0.0965837	-2.0753	-2.14774	-2.06714
YML058W	SML1	CR	60.8035	275	-1.18	-0.543724	-1.17356	-2.50337	-2.27187
YDR071C	PAA1	TFIID	60.7172	276	-0.259564	0.0180851	-2.58587	-2.36602	-2.50906
YER025W	GCD11	TFIID	60.6661	277	-0.252106	0.149251	-2.2832	-1.86368	-1.83449
YDL243C	AAD4	CR	60.5882	278	-1.4685	-1.12498	-0.820813	-2.79078	-1.37431
YLR136C	TIS11	CR	60.2221	279	-1.64098	-1.10012	-0.475125	-2.05196	-1.56778
YBR011C	IPP1	TFIID	60.0466	280	-0.352586	0.0492429	-2.21122	-1.72236	-1.87081
YEL026W	SNU13	TFIID	59.5419	281	-0.448226	0.168699	-2.85898	-2.07888	-2.29136
YNL121C	TOM70	TFIID	59.5032	282	-0.192637	0.0288156	-2.0252	-2.16888	-1.92493
YDL126C	CDC48	TFIID	59.2287	283	-0.412927	-0.153607	-1.37412	-2.46393	-2.58261
YPR132W	RPS23B	TFIID	58.766	284	-0.406449	-0.178273	-2.77409	-2.3854	-2.38114
YBR162C	TOS1	CR	58.7369	285	-0.692401	-0.334983	-1.27813	-2.34827	-2.65995
YLR180W	SAM1	CR	58.6798	286	-1.77415	-1.10448	-0.805259	-3.56034	-3.39317
YPR133W-A	TOM5	TFIID	58.5921	287	-0.297118	0.0525114	-2.10065	-1.80241	-1.60863
YJL148W	RPA34	TFIID	58.5756	288	-0.141979	-0.00555232	-2.49241	-1.81611	-1.82093
YGR264C	MES1	TFIID	58.3123	289	-0.192981	-0.0884693	-2.4129	-2.02484	-2.04703
YJL124C	LSM1	TFIID	58.308	290	-0.279702	-0.0826195	-1.80155	-1.91762	-1.843
YBL076C	ILS1	TFIID	58.282	291	-0.259542	-0.0429827	-2.47723	-2.02406	-2.1793
YLL028W	TPO1	CR	58.1623	292	-2.65656	-2.02095	-0.916852	-3.08289	-2.38924
YER148W	SPT15	TFIID	57.9149	293	-0.206138	-0.183438	-1.58776	-2.1703	-2.30696
YHR143W-A	RPC10	TFIID	57.7147	294	-0.163244	0.180032	-2.42873	-1.50354	-1.611
YIL078W	THS1	TFIID	57.6492	295	-0.140095	0.0758615	-2.3758	-2.08208	-2.05268
YKL040C	NFU1	CR	57.5807	296	-0.319501	-0.177815	-1.41368	-2.13805	-2.29914
YKL180W	RPL17A	TFIID	57.4705	297	-0.39115	-0.0956527	-2.82397	-2.39012	-2.56571
YGL058W	RAD6	TFIID	57.4176	298	-0.226864	-0.104896	-2.19552	-1.90359	-1.97906
YJL111W	CCT7	TFIID	57.2322	299	-0.204786	-0.0217908	-2.04192	-2.12028	-2.05442
YGR086C	PIL1	CR	57.2141	300	-1.24128	-0.728915	-0.825635	-3.22721	-2.84972
YMR108W	ILV2	TFIID	57.1736	301	-0.235378	0.0756727	-2.02163	-2.73773	-3.00515
YPR102C	RPL11A	TFIID	56.9375	302	-0.0620502	-0.126991	-2.44896	-1.9836	-2.11842
YDL014W	NOP1	TFIID	56.828	303	-0.303085	0.00469173	-3.18874	-2.44704	-2.41587
YHR027C	RPN1	TFIID	56.8239	304	-0.281667	-0.120687	-1.8514	-2.3746	-2.31444
YOR312C	RPL20B	TFIID	56.4728	305	-0.302277	-0.119182	-2.6298	-2.38316	-2.6116
YOR261C	RPN8	TFIID	56.4508	306	-0.192391	-0.0733226	-1.84709	-1.96525	-2.02085
YIL075C	RPN2	TFIID	56.4332	307	-0.353922	-0.198557	-1.74403	-2.61433	-2.55285
YLR388W	RPS29A	TFIID	56.4191	308	-0.526724	-0.320171	-2.54827	-2.08237	-2.19319
YLR342W	FKS1	CR	56.4039	309	-0.483882	-0.199583	-1.31583	-1.92919	-2.39696
YPL145C	KES1	TFIID	56.3053	310	-0.35342	-0.072977	-2.36339	-2.06699	-2.30323
YGL147C	RPL9A	TFIID	56.2091	311	-0.0382438	0.0322073	-2.81598	-2.12728	-2.13344
YDR427W	RPN9	TFIID	56.1571	312	-0.194623	-0.171164	-1.60434	-1.98788	-1.84623
YCL031C	RRP7	TFIID	56.065	313	-0.0796515	0.110383	-1.93657	-1.60052	-1.51805
YMR205C	PFK2	CR	56.0156	314	-0.681129	-0.357002	-1.02688	-2.68878	-2.87448
YOR276W	CAF20	TFIID	55.7595	315	-0.0551191	-0.120255	-2.50555	-1.95589	-1.99067
YNR051C	BRE5	TFIID	55.5833	316	-0.14805	0.0174947	-2.45785	-2.33906	-2.12979
YDL185W	VMA1	TFIID	55.5795	317	-0.306699	-0.117284	-2.1031	-1.87392	-2.0368
YIL142W	CCT2	TFIID	55.4375	318	-0.303468	-0.076853	-2.00393	-2.23939	-2.19816
YFR033C	QCR6	CR	55.253	319	-0.248104	0.0336805	-1.23897	-3.15785	-3.07647
YGL030W	RPL30	TFIID	55.2262	320	-0.469304	-0.0179731	-2.4734	-1.59108	-2.10913
YMR012W	CLU1	TFIID	55.0931	321	-0.26107	-0.0121847	-2.56003	-2.9236	-2.87128
YPR108W	RPN7	TFIID	55.0842	322	-0.202548	-0.0646611	-2.04711	-2.359	-2.31593
YBR067C	TIP1	TFIID	54.9583	323	-0.0302362	0.199667	-2.37831	-1.90071	-2.25841
YBR158W	AMN1	CR	54.9425	324	-1.46535	-0.752401	-0.463367	-2.3455	-1.49156
YBL028C	YBL028C	TFIID	54.8692	325	-0.129718	-0.175202	-1.98767	-2.50808	-2.6888
YDL208W	NHP2	TFIID	54.817	326	-0.172915	0.0248545	-2.6414	-2.0286	-2.06257
YER102W	RPS8B	TFIID	54.7497	327	-0.332571	-0.119519	-2.86671	-2.45832	-2.6212
YKL156W	RPS27A	TFIID	54.6348	328	-0.320765	-0.0600213	-2.41464	-2.06581	-2.26544
YPL274W	SAM3	CR	54.3645	329	-1.20217	-0.802379	-0.600285	-3.21093	-2.28785
YNL180C	RHO5	CR	54.242	330	-0.820835	-0.540321	-0.225917	-2.72402	-1.5691
YOR122C	PFY1	TFIID	54.162	331	-0.101466	0.0963106	-2.30252	-1.95323	-2.00811
YPL004C	LSP1	CR	54.0507	332	-1.04644	-0.900196	-0.873041	-3.46368	-3.45486
YOR310C	NOP58	TFIID	54.0108	333	-0.238032	0.089622	-2.68271	-2.13238	-2.30263
YDL130W	RPP1B	TFIID	53.9348	334	-0.555282	-0.150442	-2.49194	-1.91822	-2.19846
YMR122W-A	YMR122W-A	CR	53.7857	335	-2.49202	-1.87105	-0.887671	-2.18712	-2.43998
YOR303W	CPA1	CR	53.727	336	-0.817242	-0.749271	-0.348109	-2.18741	-1.35467
YOR270C	VPH1	TFIID	53.7125	337	-0.159124	-0.034665	-2.39927	-2.18793	-2.25208
YGL215W	CLG1	TFIID	53.5786	338	-0.0985341	0.000983912	-1.88772	-1.78248	-1.70612
YGL105W	ARC1	TFIID	53.5772	339	-0.27208	0.0766339	-2.04728	-1.83173	-1.7931
YLR421C	RPN13	TFIID	53.5569	340	0.0200589	0.0401898	-2.22269	-2.11068	-1.96264
YDR233C	RTN1	TFIID	53.2548	341	-0.31251	0.0219484	-2.93517	-2.3477	-2.63443
YDR054C	CDC34	TFIID	53.2159	342	-0.4679	-0.302214	-2.37436	-2.47697	-2.77978
YPR074C	TKL1	TFIID	52.9412	343	-0.442911	-0.0884491	-1.74422	-2.03167	-2.88507
YKL071W	YKL071W	CR	52.8432	344	-1.78062	-1.15959	-0.874739	-4.21673	-1.96097
YDR023W	SES1	TFIID	52.8357	345	-0.134973	0.0399608	-2.49897	-2.04811	-1.9496
YER064C	VHR2	CR	52.7558	346	-0.768322	-0.733505	-0.644383	-2.37585	-1.53451
YKR076W	ECM4	CR	52.6774	347	-0.793262	-0.640983	-0.633362	-4.03437	-2.43508
YML026C	RPS18B	TFIID	52.5782	348	-0.273907	-0.119207	-2.76081	-2.24522	-2.49409
YCR093W	CDC39	TFIID	52.3866	349	-0.214071	-0.0127127	-2.28286	-2.60794	-2.35363
YHR007C	ERG11	CR	52.3493	350	-1.00143	-0.778714	-2.0089	-2.89649	-3.83813
YLR390W-A	CCW14	CR	52.3341	351	-0.573917	-0.201448	-1.41007	-2.03216	-2.0649
YPL226W	NEW1	TFIID	52.1199	352	-0.299827	-0.0827538	-2.19142	-2.2839	-2.24272
YJR094W-A	RPL43B	TFIID	51.9995	353	-0.215251	0.0436897	-2.69117	-1.96896	-2.07275
YDL074C	BRE1	TFIID	51.9165	354	-0.0713785	0.081461	-1.79654	-1.76131	-1.73757
YER026C	CHO1	CR	51.8778	355	-0.761133	-0.619093	-2.00704	-3.60749	-3.58155
YPL239W	YAR1	TFIID	51.8506	356	-0.247255	0.0863349	-2.83112	-2.92358	-3.23925
YLR354C	TAL1	CR	51.8074	357	-0.592887	-0.451562	-1.84007	-2.45868	-3.35272
YDL137W	ARF2	TFIID	51.756	358	-0.333645	-0.408265	-2.37501	-2.24823	-2.19556
YJR121W	ATP2	CR	51.7113	359	-0.27818	-0.00788478	-1.88336	-2.0989	-2.01208
YDR487C	RIB3	CR	51.6461	360	-0.449983	-0.773898	-0.847227	-2.78609	-2.27486
YDL082W	RPL13A	TFIID	51.5432	361	-0.331385	-0.0576958	-2.68625	-2.10214	-2.40738
YML126C	ERG13	TFIID	51.5379	362	-0.323947	-0.271363	-2.29542	-2.83477	-2.81185
YDR046C	BAP3	CR	51.5192	363	-0.950882	-0.714795	-0.392485	-3.00515	-2.33313
YPL154C	PEP4	CR	51.51	364	-0.55156	-0.472571	-0.87323	-2.78784	-2.68048
YPR041W	TIF5	TFIID	51.4611	365	-0.214186	-0.0554143	-2.31426	-1.97709	-2.03496
YOR293W	RPS10A	TFIID	51.1902	366	-0.158144	-0.162495	-2.69513	-2.32412	-2.5984
YDR060W	MAK21	TFIID	51.1829	367	-0.124496	0.157835	-2.39888	-1.6913	-1.69037
YGR162W	TIF4631	TFIID	50.8784	368	-0.33138	-0.0791497	-2.75233	-2.43276	-2.78434
YPL160W	CDC60	TFIID	50.8539	369	-0.0612594	0.0894759	-2.14479	-1.90673	-2.0009
YDR003W-A	YDR003W-A	TFIID	50.8418	370	-0.888562	-0.476412	-1.7484	-3.35569	-3.68213
YMR142C	RPL13B	TFIID	50.814	371	-0.284232	-0.0442292	-2.67085	-2.2001	-2.35996
YDR064W	RPS13	TFIID	50.4553	372	-0.265472	-0.0127786	-2.41442	-1.66045	-2.16425
YOR151C	RPB2	TFIID	50.3984	373	-0.183046	-0.00369048	-1.9492	-1.78981	-1.81844
YPL093W	NOG1	TFIID	50.3614	374	-0.237586	0.151137	-2.58865	-1.79565	-1.93409
YKL009W	MRT4	TFIID	50.1499	375	0.00894105	0.16402	-2.93292	-1.75115	-1.82483
YMR177W	MMT1	CR	49.8272	376	-0.571653	-0.648082	-1.0778	-2.92422	-3.32943
YGR037C	ACB1	TFIID	49.8241	377	-0.258381	-0.2583	-2.15489	-2.45554	-2.58644
YCL037C	SRO9	TFIID	49.7954	378	-0.224622	0.218737	-2.08116	-1.89427	-1.81507
YLR009W	RLP24	TFIID	49.7326	379	-0.213567	0.148361	-2.42908	-1.85523	-1.9589
YGR285C	ZUO1	TFIID	49.7292	380	-0.294603	0.142898	-2.36115	-1.87234	-1.88572
YKL122C	SRP21	TFIID	49.7176	381	-0.0038713	0.17552	-2.68843	-2.16332	-1.94262
YOR341W	RPA190	TFIID	49.5907	382	-0.251029	0.0850781	-2.87802	-1.94327	-2.03825
YOL058W	ARG1	CR	49.5449	383	-0.0375956	0.137321	-0.429705	-1.84193	-0.319864
YFR032C-A	RPL29	TFIID	49.5169	384	-0.315224	-0.0390732	-2.62613	-1.94019	-2.17375
YCR031C	RPS14A	TFIID	49.3953	385	-0.441864	0.0283583	-2.33534	-2.07235	-2.09479
YIL069C	RPS24B	TFIID	49.3906	386	-0.296892	-0.125026	-2.81892	-2.7814	-3.00785
YNL016W	PUB1	TFIID	49.3466	387	-0.288417	-0.0975447	-2.5829	-2.47841	-2.58632
YDR172W	SUP35	TFIID	49.2531	388	-0.248824	0.156297	-2.24139	-2.01758	-2.00245
YKL196C	YKT6	TFIID	48.968	389	-0.153671	-0.01486	-2.40269	-2.46175	-2.38107
YNL154C	YCK2	TFIID	48.9328	390	-0.264707	-0.111763	-2.12638	-2.26988	-2.33269
YMR242C	RPL20A	TFIID	48.857	391	-0.211817	-0.184729	-2.36735	-2.0745	-2.1297
YJR088C	EMC2	TFIID	48.796	392	-0.172354	-0.00769007	-2.03817	-2.38066	-2.07562
YKL001C	MET14	TFIID	48.724	393	-0.285275	-0.257139	-0.148341	-3.2715	-3.05856
YGR253C	PUP2	TFIID	48.7196	394	-0.119204	-0.117277	-2.27256	-2.58462	-2.39472
YOR254C	SEC63	TFIID	48.7118	395	-0.035356	0.100334	-2.54016	-2.06794	-2.04995
YBR106W	PHO88	TFIID	48.5617	396	-0.349214	-0.151625	-1.86032	-2.6643	-2.84795
YDL097C	RPN6	TFIID	48.5028	397	-0.339718	-0.186226	-2.11191	-2.34246	-2.05402
YLR040C	AFB1	CR	48.4895	398	-0.714958	-0.312629	-3.96788	-4.5729	-4.9625
YBR283C	SSH1	TFIID	48.4147	399	-0.19978	0.0335094	-2.28667	-2.3033	-2.09432
YGR218W	CRM1	TFIID	48.1868	400	-0.113067	0.0279513	-1.79357	-2.1039	-2.2217
YNL260C	LTO1	CR	48.1825	401	-0.252774	-0.518899	-1.58243	-2.62252	-2.55955
YMR072W	ABF2	TFIID	48.029	402	-0.212443	-0.17329	-2.59907	-2.26683	-2.25977
YKL013C	ARC19	TFIID	47.9349	403	-0.1616	0.0454828	-2.00621	-2.29712	-2.09554
YGL206C	CHC1	TFIID	47.8777	404	-0.295252	-0.0482705	-1.79994	-2.23005	-2.28343
YOR232W	MGE1	TFIID	47.8666	405	-0.0057765	0.13726	-1.9604	-1.84711	-1.80625
YBL027W	RPL19B	TFIID	47.8081	406	-0.360488	-0.0593056	-2.69538	-2.39205	-2.54523
YPL243W	SRP68	TFIID	47.7409	407	0.0131004	0.148918	-2.10738	-1.90389	-1.77624
YER055C	HIS1	CR	47.7344	408	-0.0282711	0.353059	-1.66153	-1.58197	-1.92527
YKR094C	RPL40B	TFIID	47.6851	409	-0.0559735	-0.159701	-2.36313	-1.7518	-2.05155
YER072W	VTC1	CR	47.5336	410	-0.246655	-0.10067	-1.7316	-2.50644	-2.49132
YMR039C	SUB1	TFIID	47.5081	411	-0.239882	-0.13343	-3.58794	-2.73041	-3.47416
YNR016C	ACC1	CR	47.3576	412	-0.638658	-0.366864	-1.65991	-2.98646	-3.16998
YDL070W	BDF2	CR	47.1426	413	-1.26305	-1.0271	0.447007	-2.76797	-2.27908
YOR206W	NOC2	TFIID	46.9829	414	-0.0762797	0.109612	-2.63802	-1.92722	-1.84466
YBR127C	VMA2	TFIID	46.8911	415	-0.322278	-0.0122494	-2.15727	-1.91908	-1.88175
YFR004W	RPN11	TFIID	46.8089	416	-0.0867806	0.0664504	-2.27231	-2.16954	-2.09299
YGL037C	PNC1	CR	46.5997	417	-1.58474	-1.1202	-0.925315	-3.66656	-3.68947
YLR347C	KAP95	TFIID	46.5735	418	-0.582279	-0.237778	-2.36404	-2.42397	-2.75426
YJL127C-B	YJL127C-B	TFIID	46.3292	419	-0.138784	0.142537	-2.05805	-1.861	-1.70349
YFL045C	SEC53	TFIID	46.1802	420	-0.280755	-0.141833	-1.78858	-2.12504	-2.15822
YPR110C	RPC40	TFIID	46.1764	421	-0.0251716	0.167355	-2.52043	-1.67488	-1.55575
YDL160C	DHH1	TFIID	45.9542	422	-0.218222	0.00178077	-1.67479	-1.63225	-1.71898
YIL133C	RPL16A	TFIID	45.9154	423	-0.240571	-0.168752	-2.89836	-2.90769	-2.99678
YML073C	RPL6A	TFIID	45.8798	424	-0.394638	-0.14276	-2.63094	-2.17934	-2.24712
YER122C	GLO3	TFIID	45.752	425	-0.184403	0.0812122	-2.09465	-2.03746	-2.08833
YDR496C	PUF6	TFIID	45.7174	426	0.00866577	0.270453	-2.72127	-1.66753	-1.64674
YNL087W	TCB2	CR	45.7123	427	-0.918483	-0.958786	-0.451526	-2.86246	-2.45998
YLR060W	FRS1	TFIID	45.6886	428	-0.157895	0.0806121	-2.18363	-1.78139	-1.77489
YKL039W	PTM1	CR	45.6497	429	-0.315789	-0.300585	-1.39359	-2.32317	-2.58359
YHR052W	CIC1	TFIID	45.5409	430	0.0561272	0.150632	-2.64274	-1.71856	-1.96456
YCR053W	THR4	TFIID	45.4498	431	-0.114133	0.268873	-2.39658	-1.81246	-1.86231
YMR002W	MIX17	CR	45.3838	432	-0.27943	-0.113616	-0.592383	-3.17072	-3.03225
YER070W	RNR1	CR	45.3652	433	-1.70975	-1.15546	-0.774121	-2.63689	-3.2486
YPL220W	RPL1A	TFIID	45.2484	434	-0.110779	0.0259765	-2.52459	-1.92199	-2.0015
YGL207W	SPT16	TFIID	45.1878	435	-0.202346	-0.00194868	-1.89144	-2.16564	-2.06363
YER073W	ALD5	CR	45.0973	436	-0.634471	-0.710796	-1.01297	-2.19141	-2.91786
YOR335C	ALA1	TFIID	44.9894	437	-0.254193	-0.084762	-2.78159	-2.3934	-2.43556
YFL031W	HAC1	CR	44.9817	438	-0.373699	-0.0612194	-1.78066	-2.75479	-3.21296
YCR009C	RVS161	TFIID	44.942	439	-0.249045	-0.190779	-2.29818	-2.24721	-2.40786
YLL050C	COF1	TFIID	44.8905	440	-0.261087	-0.167808	-2.57519	-2.1353	-1.85798
YBL056W	PTC3	TFIID	44.8056	441	-0.323554	-0.00243254	-2.11288	-2.24902	-2.07008
YNL190W	YNL190W	CR	44.6982	442	-0.698365	-0.342728	-1.3501	-2.61245	-2.99407
YNL229C	URE2	TFIID	44.6608	443	-0.127711	0.0130927	-2.62773	-2.39105	-2.35286
YPR187W	RPO26	TFIID	44.5952	444	-0.165456	0.0899735	-2.6667	-1.90641	-1.83794
YLR448W	RPL6B	TFIID	44.5317	445	-0.245533	-0.146155	-2.69582	-2.38821	-2.59859
YIL051C	MMF1	CR	44.5301	446	-0.42531	-0.695016	-0.794986	-2.50731	-2.65761
YJR105W	ADO1	TFIID	44.5032	447	-0.383584	0.274296	-2.18152	-2.25079	-2.46188
YER133W	GLC7	TFIID	44.2916	448	-0.241022	-0.244187	-2.34517	-2.50552	-2.68783
YGL103W	RPL28	TFIID	44.1795	449	-0.123062	0.0199625	-1.63727	-2.00696	-2.38457
YNL308C	KRI1	TFIID	44.1305	450	-0.0208302	0.303984	-2.477	-1.65893	-1.55169
YLR061W	RPL22A	TFIID	44.0933	451	-0.233998	-0.0696541	-2.59142	-1.76872	-2.0996
YNL153C	GIM3	TFIID	44.0644	452	-0.110278	0.0984372	-2.88437	-2.51082	-2.55363
YMR308C	PSE1	TFIID	44.031	453	-0.124756	0.220916	-2.4302	-2.01128	-1.97615
YPL210C	SRP72	TFIID	44.0176	454	0.0155498	0.155243	-2.02883	-1.83431	-1.75224
YDR429C	TIF35	TFIID	43.9886	455	-0.229437	0.136679	-2.35689	-1.79365	-1.72168
YDR447C	RPS17B	TFIID	43.9235	456	-0.375872	-0.18921	-2.82852	-1.7176	-1.93078
YOR361C	PRT1	TFIID	43.8914	457	-0.212592	0.121491	-2.27628	-1.91224	-1.90355
YNL110C	NOP15	TFIID	43.8848	458	0.100378	0.294222	-2.84685	-1.69174	-1.91016
YDR341C	YDR341C	TFIID	43.8817	459	-0.190382	0.0647183	-2.13027	-2.04287	-2.17086
YGR279C	SCW4	CR	43.8233	460	-0.732328	-0.429536	-1.64326	-2.0395	-2.28343
YKL117W	SBA1	TFIID	43.7536	461	-0.262461	-0.0834268	-1.98238	-2.3162	-2.26104
YHR064C	SSZ1	TFIID	43.7499	462	-0.188787	0.113533	-2.14209	-1.59907	-1.64338
YOR355W	GDS1	TFIID	43.736	463	0.34197	0.529032	-3.00878	-2.92797	-2.94928
YBR121C	GRS1	TFIID	43.6293	464	-0.193794	0.203077	-2.52216	-2.15804	-1.98263
YNL189W	SRP1	TFIID	43.5531	465	-0.093947	0.0674326	-1.86476	-1.50261	-1.59
YDR368W	YPR1	TFIID	43.4924	466	-0.562972	-0.47086	-2.49551	-2.75558	-3.03815
YNL241C	ZWF1	CR	43.4656	467	-1.23591	-1.20309	-0.143682	-3.20897	-2.03258
YOL121C	RPS19A	TFIID	43.4644	468	-0.280347	-0.0792877	-2.61036	-1.91096	-2.08234
YKL103C	APE1	CR	43.4597	469	-1.24276	-0.966957	-0.946273	-3.58141	-3.26196
YLR287C-A	RPS30A	CR	43.3456	470	-0.248819	-0.213082	-2.13052	-1.95319	-2.32232
YNL096C	RPS7B	TFIID	43.3336	471	-0.332946	-0.174601	-2.73285	-2.69938	-2.89982
YHL034C	SBP1	TFIID	43.3237	472	-0.316287	0.0773289	-2.4037	-2.06262	-2.04818
YLR455W	PDP3	TFIID	43.2077	473	-0.32389	-0.160884	-2.1935	-2.62454	-2.64326
YNL070W	TOM7	TFIID	43.1363	474	-0.0383681	0.285628	-2.05028	-1.64292	-1.69281
YIL148W	RPL40A	TFIID	43.1052	475	-0.288974	-0.0990738	-2.5872	-2.47346	-2.47911
YER009W	NTF2	TFIID	43.0926	476	-0.251748	-0.0586266	-1.8783	-1.50546	-1.47756
YJR122W	IBA57	TFIID	43.0872	477	-0.39391	-0.309776	-1.73725	-1.9619	-2.14873
YHR183W	GND1	CR	43.0061	478	-0.427072	-0.337739	-2.21979	-3.51516	-3.50623
YNL104C	LEU4	CR	42.939	479	-0.227614	-0.125191	-0.617826	-2.04969	-1.62867
YGR094W	VAS1	TFIID	42.9053	480	-0.219883	0.10393	-2.69184	-2.27262	-2.27842
YDR158W	HOM2	CR	42.7941	481	-0.296824	0.0124819	-1.65892	-2.22119	-2.7499
YPL260W	YPL260W	TFIID	42.7894	482	-0.198208	0.018986	-1.80783	-1.96842	-1.83759
YAL025C	MAK16	TFIID	42.7824	483	0.0156932	0.287948	-2.61095	-1.69559	-1.64125
YDR238C	SEC26	TFIID	42.7779	484	-0.218536	0.0765236	-2.0576	-2.10306	-2.07347
YPR024W	YME1	TFIID	42.6131	485	-0.352669	-0.241268	-2.32509	-2.39238	-2.36251
YPR181C	SEC23	TFIID	42.4707	486	-0.519074	-0.00586424	-2.39101	-2.42414	-2.4744
YNL118C	DCP2	TFIID	42.4497	487	-0.18909	-0.0725175	-1.80506	-1.93835	-1.96826
YKR008W	RSC4	TFIID	42.4408	488	-0.13969	-0.075916	-1.70589	-2.20024	-1.99102
YER090W	TRP2	TFIID	42.403	489	-0.213046	-0.062776	-1.55453	-1.98086	-2.15581
YOR117W	RPT5	TFIID	42.383	490	-0.312208	0.0183101	-2.1839	-2.25617	-2.13884
YGR034W	RPL26B	TFIID	42.3781	491	-0.273559	-0.0920125	-2.76188	-1.94434	-2.27172
YNL212W	VID27	TFIID	42.3497	492	-0.44298	-0.505653	-2.17196	-2.1268	-2.24422
YMR229C	RRP5	TFIID	42.3195	493	0.00182421	0.265072	-2.26615	-1.68086	-1.57493
YAL016W	TPD3	TFIID	42.2778	494	-0.232302	0.00404233	-1.84858	-1.99771	-1.78987
YMR161W	HLJ1	TFIID	42.2408	495	-0.0670561	0.142511	-2.37278	-2.59273	-2.46573
YFR052W	RPN12	TFIID	42.2014	496	-0.264489	-0.209898	-1.90238	-2.08147	-2.15374
YNL066W	SUN4	CR	42.1381	497	-1.19239	-0.765849	-0.945495	-3.05767	-2.03036
YFL016C	MDJ1	TFIID	42.0716	498	-0.514952	0.164498	-2.92495	-3.80434	-3.67695
YNL113W	RPC19	TFIID	42.0443	499	-0.135441	0.178976	-2.59947	-1.81627	-1.67191
YOR168W	GLN4	TFIID	41.9934	500	-0.114744	0.192367	-2.17015	-2.07974	-2.04799
YPL204W	HRR25	TFIID	41.8923	501	-0.292262	0.0275049	-2.03427	-2.06882	-2.08139
YGL190C	CDC55	TFIID	41.7294	502	-0.0613312	0.17758	-2.0196	-2.35847	-2.26736
YOR370C	MRS6	TFIID	41.7121	503	-0.316005	0.090355	-1.7251	-2.16823	-2.07404
YDR151C	CTH1	TFIID	41.7029	504	-0.1102	0.418362	-2.09403	-2.28852	-2.1698
YKR057W	RPS21A	TFIID	41.443	505	-0.0373273	0.0344554	-2.74687	-1.81399	-2.01448
YER087C-B	SBH1	TFIID	41.4188	506	-0.198234	-0.089086	-2.56107	-2.00128	-2.17745
YDR035W	ARO3	TFIID	41.2765	507	-0.0553174	0.0627504	-2.41135	-2.48407	-2.52512
YOR267C	HRK1	TFIID	41.2199	508	-0.689515	-0.17056	-2.0762	-3.36106	-3.41588
YLR413W	INA1	CR	41.2085	509	-1.69296	-1.43488	-1.97199	-2.85811	-3.46675
YBL072C	RPS8A	TFIID	41.1978	510	-0.171606	-0.0936471	-2.55622	-2.41007	-2.30211
YEL065W	SIT1	CR	41.1725	511	-1.69801	-1.16455	-1.23871	-2.09916	-1.89506
YBR154C	RPB5	TFIID	41.0506	512	-0.0993498	0.170456	-2.75017	-2.11556	-2.08035
YGR116W	SPT6	TFIID	41.023	513	-0.187304	0.203774	-2.14651	-2.31484	-1.99722
YOL136C	PFK27	CR	41.0205	514	-0.382891	-0.612418	-1.23717	-2.80508	-3.45374
YPL078C	ATP4	TFIID	41.0152	515	-0.16697	-0.011865	-1.95861	-1.76628	-1.60632
YJL109C	UTP10	TFIID	41.0091	516	-0.195993	-0.0169686	-2.31859	-1.81853	-1.87122
YMR235C	RNA1	TFIID	40.9658	517	-0.143807	0.163144	-2.48817	-2.04962	-1.98178
YDR091C	RLI1	TFIID	40.9523	518	-0.111023	0.138438	-1.921	-1.52956	-1.69623
YBL099W	ATP1	TFIID	40.8519	519	-0.214165	0.0485594	-1.82862	-2.28368	-1.85978
YPR036W	VMA13	TFIID	40.8176	520	-0.386078	-0.111438	-2.92426	-2.27052	-2.38609
YOL154W	ZPS1	CR	40.8103	521	-2.70994	-1.44511	-1.93538	-2.47354	-2.59263
YLR051C	FCF2	TFIID	40.7472	522	-0.0336912	0.231939	-1.9449	-1.52799	-1.44194
YNL002C	RLP7	TFIID	40.7342	523	0.0353171	0.0748583	-2.7323	-2.24042	-2.13666
YKR095W	MLP1	TFIID	40.6997	524	-0.115085	0.124906	-1.76094	-2.05948	-1.95324
YBR034C	HMT1	TFIID	40.6048	525	-0.191598	0.0760385	-2.28744	-2.29278	-2.31581
YDL140C	RPO21	TFIID	40.5178	526	-0.19042	-0.008904	-1.88538	-1.98229	-2.05274
YDR394W	RPT3	TFIID	40.4267	527	-0.23674	-0.0911279	-2.07865	-2.24839	-2.18274
YPL117C	IDI1	TFIID	40.3178	528	-0.320651	-0.311453	-2.73935	-2.56035	-3.03615
YGR135W	PRE9	TFIID	40.3106	529	-0.164242	-0.0360978	-2.10045	-2.36705	-2.34746
YNL085W	MKT1	TFIID	40.2837	530	-0.172815	0.0886899	-1.96037	-1.83669	-1.74331
YLR064W	PER33	CR	40.2757	531	-0.292869	-0.280872	-1.49136	-2.1338	-2.38423
YML012W	ERV25	TFIID	40.2596	532	-0.144692	0.13287	-2.40287	-2.28252	-2.24904
YBL041W	PRE7	TFIID	40.1567	533	-0.201606	-0.0769308	-2.05397	-2.08405	-2.13661
YKL210W	UBA1	TFIID	40.1471	534	-0.0477986	-0.0173985	-2.13864	-1.83778	-1.73064
YGL011C	SCL1	TFIID	40.0545	535	-0.166992	-0.0738567	-2.16207	-2.16671	-2.14126
YDR471W	RPL27B	TFIID	40.005	536	-0.22528	-0.144084	-3.12227	-2.52056	-2.86093
YGR124W	ASN2	TFIID	39.9751	537	-0.25893	0.0972983	-3.02289	-2.50031	-2.6269
YOR332W	VMA4	TFIID	39.9429	538	-0.15681	-0.0358286	-2.26698	-1.80491	-1.93178
YER002W	NOP16	TFIID	39.8137	539	-0.0676103	0.247761	-2.12132	-2.02538	-1.88009
YJL189W	RPL39	TFIID	39.8013	540	-0.123651	-0.0608557	-2.32448	-1.61804	-1.77013
YKL178C	STE3	CR	39.7304	541	-1.04688	-0.647276	-2.75029	-4.50423	-5.16594
YFL004W	VTC2	CR	39.596	542	-0.103376	0.000877439	-2.0183	-2.54656	-2.52108
YDL145C	COP1	TFIID	39.5844	543	-0.179722	0.0714487	-1.88505	-1.78886	-1.67439
YGL195W	GCN1	TFIID	39.5406	544	-0.0541734	0.245252	-2.08702	-1.83176	-1.89516
YJL052W	TDH1	CR	39.5133	545	-3.61234	-3.00878	0.406255	-3.53095	-4.38305
YMR143W	RPS16A	TFIID	39.4588	546	-0.250327	-0.128414	-2.25369	-2.135	-2.32154
YML007W	YAP1	CR	39.4564	547	-0.335021	-0.10305	-0.578158	-1.91792	-2.0434
YDR077W	SED1	CR	39.419	548	-1.03078	-0.705002	-0.937353	-1.57774	-1.14513
YMR079W	SEC14	TFIID	39.2031	549	-0.130807	0.0284291	-2.39349	-2.08847	-2.09765
YDR270W	CCC2	CR	39.1586	550	-0.830222	-0.768673	-0.527463	-2.84113	-2.73382
YJR063W	RPA12	TFIID	39.1448	551	-0.494287	0.102058	-3.07016	-2.28594	-2.17054
YDR214W	AHA1	CR	39.1003	552	-0.349967	0.108222	-1.39933	-3.13057	-3.07631
YPR103W	PRE2	TFIID	39.0725	553	-0.354104	-0.126734	-2.01855	-2.20266	-2.06935
YDR365C	ESF1	TFIID	39.0676	554	-0.160245	0.209308	-1.78268	-2.02203	-2.17076
YCL043C	PDI1	CR	39.0158	555	-0.531055	-0.377485	-1.73222	-3.1214	-3.29421
YOL120C	RPL18A	TFIID	39.0024	556	-0.312065	0.00355564	-2.4682	-1.72112	-2.02687
YGL173C	XRN1	TFIID	38.8726	557	-0.120601	0.0563305	-1.73351	-1.91677	-1.85751
YGL122C	NAB2	TFIID	38.7672	558	-0.396306	-0.257782	-2.11157	-2.13261	-2.20027
YDL235C	YPD1	TFIID	38.6207	559	-0.0585277	0.0481377	-2.40636	-2.32504	-2.37432
YDL075W	RPL31A	TFIID	38.6087	560	-0.342651	-0.0416693	-2.4617	-1.94573	-2.0767
YLR276C	DBP9	TFIID	38.578	561	0.0635506	0.246396	-2.51724	-1.81678	-1.69239
YER012W	PRE1	TFIID	38.5774	562	-0.190495	-0.172115	-2.19346	-2.62619	-2.4057
YPL212C	PUS1	TFIID	38.5522	563	-0.140237	0.0580059	-2.44614	-1.96805	-2.00945
YKL184W	SPE1	TFIID	38.5503	564	-0.332812	-0.194473	-2.59294	-2.3419	-2.72216
YMR230W	RPS10B	TFIID	38.5223	565	-0.0185947	-0.0821965	-2.5922	-2.00451	-2.31439
YDL029W	ARP2	CR	38.4727	566	-0.239118	-0.114079	-1.59651	-2.24522	-2.28734
YLR447C	VMA6	TFIID	38.4096	567	-0.0262421	0.0761762	-1.98233	-1.80364	-1.68613
YNL024C-A	KSH1	TFIID	38.4002	568	-0.042346	0.136233	-2.87348	-1.87082	-2.03296
YJR117W	STE24	TFIID	38.134	569	-0.432448	0.0517015	-2.03796	-2.40053	-2.19557
YPL249C-A	RPL36B	TFIID	38.126	570	-0.312751	-0.0602958	-2.47317	-1.8289	-2.05971
YKL057C	NUP120	TFIID	38.1123	571	-0.201937	-0.0709727	-1.81673	-2.02828	-1.90152
YLR257W	YLR257W	TFIID	38.0754	572	-0.263105	-0.146099	-1.89992	-2.58905	-3.20274
YOR039W	CKB2	TFIID	38.0654	573	-0.200532	-0.0160453	-2.6448	-2.21931	-2.10857
YDR346C	SVF1	TFIID	38.0566	574	-0.172629	-0.102116	-2.05245	-1.9131	-2.11773
YPL043W	NOP4	TFIID	38.0329	575	-0.051212	0.290034	-2.54947	-1.84887	-1.82243
YOR360C	PDE2	TFIID	38.027	576	0.127738	0.0949575	-1.66673	-1.62166	-1.86718
YGL029W	CGR1	TFIID	38.0171	577	-0.00792984	0.114044	-2.60279	-2.05516	-1.94462
YFR040W	SAP155	TFIID	38.0161	578	-0.166905	-0.0150422	-1.8776	-2.10818	-1.95982
YNL248C	RPA49	TFIID	37.9819	579	0.00562292	0.178048	-2.51385	-1.69801	-1.62854
YDL007W	RPT2	TFIID	37.9744	580	-0.17989	0.00382566	-2.1184	-2.48207	-2.37044
YML024W	RPS17A	TFIID	37.9693	581	-0.167874	-0.139051	-2.68136	-2.70578	-2.67603
YOL027C	MDM38	TFIID	37.9097	582	-0.0486262	0.225492	-2.14827	-1.82229	-1.85299
YBL024W	NCL1	TFIID	37.8816	583	-0.111117	0.172643	-2.3297	-1.9404	-1.97758
YER103W	SSA4	TFIID	37.8749	584	0.20007	0.548844	-1.58374	-5.33618	-3.93624
YIL126W	STH1	TFIID	37.8082	585	-0.116747	0.216742	-2.90961	-3.0549	-2.59304
YPL050C	MNN9	TFIID	37.7868	586	0.0544332	0.215814	-2.08661	-1.85407	-1.83658
YOR259C	RPT4	TFIID	37.7834	587	-0.285359	-0.0717967	-2.23245	-2.16155	-2.08696
YDR174W	HMO1	TFIID	37.7757	588	-0.0283202	0.233468	-2.11634	-1.8539	-1.89801
YMR188C	MRPS17	TFIID	37.7726	589	0.116992	0.0850493	-1.92662	-1.76963	-1.64134
YOL145C	CTR9	TFIID	37.7375	590	-0.162564	0.0656827	-2.40288	-2.10707	-2.05306
YDR299W	BFR2	TFIID	37.7155	591	0.214638	0.277288	-2.18587	-1.58625	-1.32121
YGR020C	VMA7	TFIID	37.6743	592	-0.523591	-0.141965	-2.65544	-2.46963	-2.58698
YPR072W	NOT5	TFIID	37.6621	593	-0.155894	0.074848	-1.78652	-1.78907	-1.68973
YDR212W	TCP1	TFIID	37.6321	594	-0.236074	0.157126	-2.3789	-2.31937	-2.26115
YKL054C	DEF1	CR	37.5941	595	-0.0684408	0.195496	-0.965726	-1.17017	-1.46646
YLR292C	SEC72	TFIID	37.5847	596	-0.020469	0.0891799	-2.00471	-1.63104	-1.8028
YPL179W	PPQ1	TFIID	37.5798	597	-0.13367	-0.00524156	-1.74975	-1.76223	-1.85714
YMR217W	GUA1	TFIID	37.5516	598	-0.352577	0.0315642	-2.36069	-1.64607	-1.92202
YIL035C	CKA1	TFIID	37.5053	599	0.0158167	0.0846616	-1.9267	-1.84295	-1.70118
YDR381W	YRA1	CR	37.4927	600	-0.526999	-0.571531	-0.621347	-3.13692	-2.09967
YHR128W	FUR1	CR	37.3832	601	-0.58365	-0.383252	-2.09373	-2.63847	-3.22446
YMR146C	TIF34	TFIID	37.3323	602	-0.351436	0.0860129	-2.89395	-2.26776	-2.19101
YPL190C	NAB3	TFIID	37.3025	603	-0.1768	0.121339	-1.61223	-1.78846	-1.70382
YJL014W	CCT3	TFIID	37.286	604	-0.129295	0.145297	-2.03541	-2.2221	-2.14843
YKR052C	MRS4	CR	37.2854	605	-0.377561	0.324786	-0.963504	-1.84928	-1.05834
YML103C	NUP188	TFIID	37.2502	606	-0.0742288	0.0373929	-1.9881	-1.94091	-1.91893
YPR143W	RRP15	TFIID	37.214	607	-0.0149191	0.0424576	-2.63689	-1.82963	-1.70297
YMR246W	FAA4	CR	37.1592	608	-1.31071	-1.17046	-1.74375	-3.582	-3.67673
YNL197C	WHI3	TFIID	37.0655	609	-0.234523	-0.073191	-1.76523	-2.14105	-2.04499
YKL035W	UGP1	CR	37.0299	610	-0.377928	-0.134926	-1.23858	-3.22515	-3.16892
YPL202C	AFT2	CR	37.0109	611	-0.243529	-0.278133	-0.952066	-2.18744	-2.38942
YOR089C	VPS21	TFIID	36.9531	612	-0.138237	0.0527582	-2.12735	-2.25567	-2.25752
YOL077C	BRX1	TFIID	36.91	613	0.0199549	0.258468	-2.47296	-1.44394	-1.40354
YBR286W	APE3	CR	36.8851	614	-0.312716	0.0296794	-1.77878	-2.7658	-2.71097
YJL130C	URA2	CR	36.831	615	-0.605912	-0.251767	-1.46112	-2.09488	-2.3289
YGR103W	NOP7	TFIID	36.8217	616	-0.066732	0.176509	-2.54637	-1.62565	-1.53027
YER126C	NSA2	TFIID	36.7796	617	0.144521	0.258188	-2.47554	-1.53828	-1.65931
YDR450W	RPS18A	TFIID	36.648	618	-0.134584	-0.016272	-2.78175	-2.21161	-2.28875
YMR183C	SSO2	TFIID	36.6303	619	-0.295501	-0.100397	-2.17926	-1.74788	-1.70328
YKR014C	YPT52	TFIID	36.6249	620	0.042323	0.383432	-1.94899	-1.96039	-1.72736
YHR196W	UTP9	TFIID	36.5471	621	0.248388	0.236347	-1.60984	-1.30814	-1.34274
YGR229C	SMI1	TFIID	36.4973	622	-0.299601	-0.0379421	-3.08171	-3.27117	-3.66085
YOL049W	GSH2	TFIID	36.4297	623	-0.121817	-0.00350041	-2.34005	-2.28739	-2.05012
YML074C	FPR3	TFIID	36.4205	624	-0.339968	0.0875032	-2.56353	-2.02446	-1.86186
YIL118W	RHO3	TFIID	36.3705	625	-0.146599	0.0797764	-2.57411	-2.31593	-2.41481
YMR131C	RRB1	TFIID	36.3257	626	-0.182301	0.167847	-2.65487	-2.00043	-1.99425
YNL061W	NOP2	TFIID	36.3115	627	-0.0521578	0.182154	-2.57269	-1.55718	-1.61002
YBR177C	EHT1	CR	36.2995	628	-0.960979	-0.230842	-1.6956	-3.04057	-3.18898
YJL002C	OST1	TFIID	36.243	629	-0.239938	0.0165699	-1.81415	-2.21345	-2.05308
YDR377W	ATP17	TFIID	36.2105	630	-0.084175	0.224135	-2.18652	-2.47012	-1.93016
YFL037W	TUB2	TFIID	36.2046	631	-0.422239	-0.0553136	-2.44516	-2.63313	-2.41693
YPL171C	OYE3	CR	36.1209	632	-2.19754	-1.48187	-1.22911	-3.59255	-2.41855
YGL238W	CSE1	TFIID	36.0937	633	-0.0720592	0.0654824	-1.82297	-2.03879	-1.92067
YPL178W	CBC2	TFIID	36.0907	634	-0.157826	0.137336	-2.26375	-1.96221	-1.86411
YDL148C	NOP14	TFIID	36.0258	635	-0.0505568	0.306067	-2.38399	-1.76463	-1.65558
YIL038C	NOT3	TFIID	35.9454	636	-0.107172	0.146522	-1.77377	-1.8784	-1.75854
YJL008C	CCT8	TFIID	35.9373	637	-0.231154	0.0509361	-2.05959	-2.15974	-2.05652
YOR043W	WHI2	TFIID	35.8971	638	-0.327576	-0.113448	-1.52664	-2.48629	-2.44993
YHR094C	HXT1	CR	35.8911	639	-2.61812	-1.87739	-0.68158	-2.23645	-2.29929
YGR185C	TYS1	TFIID	35.88	640	-0.140473	0.090901	-2.15611	-1.68387	-1.66456
YDR190C	RVB1	TFIID	35.8625	641	-0.186662	0.176941	-2.24885	-1.98908	-1.89999
YML022W	APT1	TFIID	35.8359	642	-0.0851617	0.319954	-2.18616	-1.73432	-1.82685
YJL177W	RPL17B	TFIID	35.8141	643	-0.112457	-0.14682	-2.79869	-2.23827	-2.41626
YHR141C	RPL42B	TFIID	35.7803	644	-0.360996	-0.194767	-2.48135	-2.59999	-2.81808
YBR084C-A	RPL19A	TFIID	35.7702	645	-0.300647	-0.206091	-2.43809	-2.41187	-2.59224
YBL022C	PIM1	TFIID	35.7665	646	-0.318429	-0.113017	-1.87424	-2.48827	-2.30387
YDR508C	GNP1	CR	35.7655	647	-1.14309	-0.818619	-0.924893	-2.78062	-3.23259
YGR017W	YGR017W	TFIID	35.748	648	-0.139848	0.063582	-3.03433	-2.70091	-2.62353
YFR010W	UBP6	TFIID	35.7217	649	-0.178697	0.0818998	-1.92393	-2.3609	-2.18932
YDR264C	AKR1	TFIID	35.7139	650	-0.362763	-0.258325	-2.17172	-2.35336	-2.48361
YFL038C	YPT1	TFIID	35.7096	651	-0.272797	0.0201202	-2.60619	-2.24919	-2.06404
YGL077C	HNM1	CR	35.6972	652	-0.547198	-0.126548	-1.62207	-2.28361	-2.40755
YHL011C	PRS3	TFIID	35.6898	653	0.00342881	0.207009	-2.53902	-1.81108	-1.92746
YPL273W	SAM4	TFIID	35.6463	654	-0.125492	0.0794778	-2.00366	-2.19038	-1.98906
YKL063C	YKL063C	TFIID	35.58	655	-0.153829	0.0950717	-2.10266	-2.2571	-2.34069
YBR130C	SHE3	TFIID	35.4496	656	-0.214958	-0.0922133	-1.95636	-1.91681	-1.72275
YGR132C	PHB1	TFIID	35.4192	657	-0.192001	0.104154	-1.8809	-2.03081	-1.86805
YHR170W	NMD3	TFIID	35.3701	658	-0.0916944	0.121302	-2.62041	-1.73471	-1.90051
YBR049C	REB1	TFIID	35.3434	659	-0.127706	0.15432	-2.09515	-2.14363	-1.72296
YDR395W	SXM1	TFIID	35.3386	660	-0.106306	0.0856276	-2.3212	-2.01931	-2.0637
YGR090W	UTP22	TFIID	35.3384	661	-0.0813257	0.14958	-2.20376	-2.25183	-2.18416
YOR078W	BUD21	TFIID	35.3333	662	-0.0586024	0.096549	-2.72292	-1.7608	-1.90733
YER136W	GDI1	TFIID	35.3252	663	-0.283681	-0.0598081	-2.36191	-2.42195	-2.41299
YDL180W	YDL180W	CR	35.314	664	-0.658841	-0.398068	-1.44884	-2.62129	-3.21742
YPR169W	JIP5	TFIID	35.2714	665	0.0230451	0.0603866	-2.0611	-1.77771	-1.79077
YLR033W	RSC58	TFIID	35.2303	666	-0.0055522	0.140713	-2.18844	-2.11637	-1.80756
YPR043W	RPL43A	TFIID	35.207	667	-0.338427	-0.106993	-2.09739	-1.80894	-2.04764
YOL041C	NOP12	TFIID	35.1269	668	0.00783762	0.345549	-1.90808	-1.51558	-1.26007
YIL018W	RPL2B	TFIID	35.1124	669	-0.330615	-0.0534331	-2.73775	-2.3018	-2.48845
YMR194W	RPL36A	TFIID	35.0715	670	-0.107383	-0.170562	-2.30833	-1.87508	-2.06608
YKR028W	SAP190	TFIID	34.9907	671	-0.162648	-0.0215666	-1.96307	-2.26728	-2.07234
YDR032C	PST2	CR	34.953	672	-0.567741	-1.03186	-0.586234	-2.54014	-2.31764
YPL118W	MRP51	TFIID	34.9125	673	0.0111729	0.182366	-2.27995	-2.12425	-1.95052
YDL083C	RPS16B	TFIID	34.9115	674	-0.217022	-0.218802	-2.87379	-2.49814	-2.51431
YBR146W	MRPS9	TFIID	34.9018	675	-0.097514	0.118646	-1.94878	-1.91838	-1.82377
YKL028W	TFA1	TFIID	34.8866	676	-0.163552	-0.0246892	-1.86518	-1.73052	-1.68268
YDR028C	REG1	TFIID	34.8834	677	-0.087931	0.114141	-2.09932	-2.25887	-2.19317
YKL006W	RPL14A	TFIID	34.8617	678	-0.260205	-0.112069	-2.47783	-2.09959	-2.1057
YKL179C	COY1	TFIID	34.8113	679	0.0197941	0.189776	-2.06418	-2.02796	-1.81962
YGR054W	YGR054W	TFIID	34.8046	680	-0.240675	0.0952445	-2.35755	-2.18637	-2.41785
YJL080C	SCP160	TFIID	34.737	681	-0.231615	0.0933394	-2.54632	-2.19408	-2.18996
YOR290C	SNF2	TFIID	34.7207	682	-0.27962	0.00700655	-1.86761	-2.2497	-1.97041
YER056C	FCY2	CR	34.7145	683	-0.741812	-0.573726	-0.88055	-1.90214	-2.73845
YPL079W	RPL21B	TFIID	34.6079	684	-0.223457	-0.194038	-2.33531	-1.80357	-1.95416
YPL265W	DIP5	CR	34.5541	685	-1.1824	-0.863563	-0.00647749	-1.79368	-2.40691
YDL025C	RTK1	CR	34.5226	686	-0.542485	-0.322918	-1.37485	-3.12125	-3.46532
YGL009C	LEU1	TFIID	34.5219	687	0.694944	0.830941	-0.650702	-1.62921	-1.72277
YHR135C	YCK1	TFIID	34.4844	688	-0.330989	-0.0199078	-2.3892	-2.24958	-2.1139
YER074W	RPS24A	TFIID	34.4241	689	-0.428954	-0.080927	-2.72972	-2.46128	-2.33231
YKR081C	RPF2	TFIID	34.3808	690	0.00615576	0.241544	-2.76886	-1.77818	-1.74107
YGR106C	VOA1	TFIID	34.3427	691	-0.197094	-0.055506	-2.31131	-2.06817	-2.16957
YGL245W	GUS1	TFIID	34.3341	692	-0.127473	0.175527	-2.10244	-1.77437	-1.67186
YGR161C	RTS3	CR	34.3305	693	-0.876578	-0.895181	-0.612831	-2.65352	-1.68614
YDL125C	HNT1	CR	34.3076	694	-0.600423	-0.508046	-1.01944	-2.03643	-2.44038
YDL122W	UBP1	TFIID	34.1768	695	-0.0979357	0.0903483	-2.16644	-2.22221	-2.30883
YJL136C	RPS21B	TFIID	34.1652	696	-0.0900493	-0.187213	-2.70235	-2.38858	-2.41116
YKR011C	YKR011C	TFIID	34.1651	697	-0.378442	-0.427607	-1.48232	-2.48125	-2.15439
YDL053C	PBP4	TFIID	34.0768	698	0.0900447	0.349908	-2.25204	-1.85555	-1.70545
YCL054W	SPB1	TFIID	34.0615	699	-0.0319297	0.187716	-2.34761	-1.59645	-1.4899
YCL011C	GBP2	TFIID	34.0424	700	-0.126969	0.0823625	-2.24569	-1.89663	-1.77173
YDR127W	ARO1	CR	34.0386	701	-0.105416	0.303468	-1.58076	-1.67532	-1.40367
YIL149C	MLP2	TFIID	34.0225	702	-0.0852225	0.108063	-2.07381	-2.24017	-1.98739
YFR002W	NIC96	TFIID	34.0142	703	-0.120963	0.208694	-1.72898	-1.83684	-1.63344
YJL133C-A	YJL133C-A	CR	33.9902	704	-1.77388	-1.41072	0.261633	-2.63532	-1.57803
YPL012W	RRP12	TFIID	33.9872	705	-0.011216	0.268226	-2.51715	-1.86199	-1.82989
YGR146C	ECL1	CR	33.9856	706	-0.517582	-0.426029	-0.200153	-1.89011	-1.75097
YPL215W	CBP3	TFIID	33.9138	707	-0.0481972	0.0892593	-1.71298	-1.87003	-1.72941
YML009C	MRPL39	TFIID	33.8453	708	-0.257827	0.0592723	-3.00362	-2.52552	-2.38955
YGR128C	UTP8	TFIID	33.845	709	0.0376361	0.236568	-2.43978	-1.87817	-1.8051
YOL068C	HST1	TFIID	33.836	710	-0.0436547	0.0466271	-1.85161	-1.94471	-1.73308
YPR016C	TIF6	TFIID	33.8005	711	-0.29968	0.0590032	-2.58546	-2.2465	-2.46631
YGR231C	PHB2	TFIID	33.7827	712	-0.34976	-0.0413701	-2.17144	-2.13314	-2.03319
YER123W	YCK3	TFIID	33.7598	713	0.186548	0.308255	-1.30177	-1.39036	-1.30047
YDR226W	ADK1	CR	33.7565	714	-0.579902	-0.5983	-1.86778	-3.06493	-2.98897
YPR010C	RPA135	TFIID	33.7316	715	-0.130687	0.169192	-2.84219	-2.05724	-2.22107
YGR130C	YGR130C	TFIID	33.7308	716	-0.248848	-0.118643	-1.93645	-2.20885	-2.34079
YEL051W	VMA8	TFIID	33.73	717	-0.0928499	0.0428528	-2.48242	-2.03664	-2.07022
YCR004C	YCP4	TFIID	33.6739	718	-0.2681	-0.284298	-1.52469	-2.39759	-2.66329
YMR295C	YMR295C	TFIID	33.6104	719	-0.338474	-0.169979	-2.45101	-3.1381	-3.21682
YNL044W	YIP3	TFIID	33.6099	720	-0.31548	-0.367003	-2.27963	-2.85787	-2.62615
YML093W	UTP14	TFIID	33.5975	721	-0.0525963	0.265056	-2.41621	-1.82257	-1.71879
YDR152W	GIR2	TFIID	33.595	722	0.0224671	0.0189847	-2.16536	-1.62676	-1.61049
YDR153C	ENT5	TFIID	33.5836	723	-0.14777	0.121362	-2.54041	-2.14362	-2.2122
YLR297W	YLR297W	CR	33.5452	724	-1.74657	-2.84537	-0.627245	-2.59603	-4.24205
YPL146C	NOP53	TFIID	33.5376	725	0.111125	0.167498	-2.52167	-2.19635	-2.26383
YNL005C	MRP7	TFIID	33.4752	726	0.0625527	0.27717	-2.29045	-2.01993	-1.86804
YPL105C	SYH1	TFIID	33.4724	727	-0.259647	0.103996	-1.81701	-2.00411	-1.91893
YNR021W	YNR021W	TFIID	33.4163	728	-0.147476	0.0544549	-2.03209	-1.8083	-1.67751
YPL019C	VTC3	CR	33.4012	729	-0.115626	-0.0933436	-1.32969	-2.82505	-3.0191
YJR014W	TMA22	TFIID	33.3935	730	-0.259256	-0.160784	-2.7855	-2.21741	-2.1913
YHR005C	GPA1	TFIID	33.3931	731	-0.444372	-0.146397	-2.35703	-2.17734	-2.7321
YBR162W-A	YSY6	TFIID	33.3359	732	-0.263474	0.0124224	-2.77051	-2.91401	-2.90418
YML056C	IMD4	TFIID	33.3303	733	-0.333821	-0.463489	-2.31577	-2.51399	-3.13397
YKL145W	RPT1	TFIID	33.3086	734	-0.317573	-0.202574	-2.22234	-2.44569	-2.28908
YHR203C	RPS4B	TFIID	33.3025	735	-0.301442	-0.0790045	-2.63781	-2.35126	-2.41578
YGL244W	RTF1	TFIID	33.2918	736	-0.105452	0.248388	-2.20231	-2.21525	-1.8644
YDL116W	NUP84	TFIID	33.2713	737	-0.0459785	0.143331	-1.80191	-1.87753	-1.58299
YDL143W	CCT4	TFIID	33.2614	738	-0.254761	0.18124	-2.02713	-2.05888	-1.93787
YMR203W	TOM40	TFIID	33.2573	739	-0.331556	0.0674401	-2.21182	-2.09531	-1.98274
YLR310C	CDC25	TFIID	33.2544	740	-0.207944	-0.0561915	-2.19472	-2.04965	-2.0277
YOR008C	SLG1	TFIID	33.2536	741	-0.515402	-0.426271	-2.83632	-2.61535	-2.93946
YKL120W	OAC1	CR	33.224	742	-0.201517	-0.241121	-0.952452	-2.31365	-2.25779
YDR335W	MSN5	TFIID	33.1971	743	-0.158737	-0.104293	-2.15342	-2.41908	-2.42431
YHR077C	NMD2	TFIID	33.1966	744	-0.0345253	0.0823618	-1.73005	-1.61002	-1.65359
YGR267C	FOL2	TFIID	33.1949	745	0.0719754	0.00487467	-2.13183	-1.7431	-1.82095
YEL033W	MTC7	CR	33.1891	746	-0.809734	-0.502904	-0.989225	-2.79583	-2.67575
YPR067W	ISA2	TFIID	33.1595	747	-0.300981	-0.0408568	-2.3939	-2.43999	-2.27415
YBR086C	IST2	TFIID	33.1398	748	-0.426814	-0.288391	-2.26375	-2.90212	-2.95204
YGR175C	ERG1	CR	33.1365	749	-0.638645	-0.606262	-1.9972	-3.97342	-3.95163
YGL043W	DST1	TFIID	33.1121	750	-0.144875	0.129077	-2.14968	-1.61971	-1.59421
YGL078C	DBP3	TFIID	33.0759	751	-0.0976098	0.187544	-3.09755	-2.38086	-2.50125
YJL168C	SET2	TFIID	33.0742	752	-0.197178	-0.0122361	-2.35725	-2.44692	-2.28323
YMR037C	MSN2	CR	33.0126	753	-0.41159	-0.259998	-1.73765	-2.23219	-2.12085
YLR221C	RSA3	TFIID	33.0035	754	0.0762022	0.151694	-2.68171	-1.94446	-1.79919
YML038C	YMD8	TFIID	32.9821	755	-0.27003	-0.224808	-1.90403	-1.99412	-2.00432
YOR224C	RPB8	TFIID	32.967	756	0.0944608	0.318566	-2.71073	-1.57766	-1.70296
YNL091W	NST1	TFIID	32.9622	757	-0.169879	0.128275	-1.85121	-2.22219	-2.03699
YGR167W	CLC1	TFIID	32.96	758	-0.20184	0.0928804	-2.19467	-2.21759	-2.09432
YGL188C-A	YGL188C-A	TFIID	32.9193	759	0.312382	-0.0779766	-1.81945	-2.00361	-2.08903
YFR050C	PRE4	TFIID	32.9117	760	-0.109737	-0.0164363	-1.92897	-2.2198	-2.07926
YKL104C	GFA1	TFIID	32.8834	761	-0.293573	-0.00179252	-2.26421	-2.34081	-2.84103
YDR062W	LCB2	TFIID	32.8682	762	-0.293494	-0.0317525	-2.74758	-2.67911	-2.70996
YOR247W	SRL1	CR	32.8451	763	-1.0395	-0.569298	-0.133999	-1.92719	-1.76094
YML081C-A	ATP18	TFIID	32.8032	764	-0.216618	0.162343	-2.32121	-2.09208	-1.72973
YCR033W	SNT1	TFIID	32.8005	765	-0.274832	-0.0294925	-2.06151	-2.20681	-2.11128
YJL012C	VTC4	CR	32.7897	766	-0.068391	0.110848	-1.6946	-2.66029	-2.6135
YKL080W	VMA5	TFIID	32.7852	767	-0.212538	0.11064	-2.04525	-1.7902	-1.80265
YOR326W	MYO2	TFIID	32.7718	768	-0.225911	0.000578731	-2.2429	-2.41064	-2.39414
YCR082W	AHC2	TFIID	32.7529	769	0.183804	0.209596	-1.78735	-1.84743	-1.76624
YLR432W	IMD3	CR	32.7358	770	-0.60645	-0.319346	-2.28951	-2.71824	-3.45458
YMR173W	DDR48	CR	32.7065	771	-2.80237	-1.99622	-0.304942	-3.35943	-2.60426
YBR029C	CDS1	TFIID	32.6938	772	-0.494881	-0.374949	-2.63826	-2.645	-3.01719
YPL090C	RPS6A	TFIID	32.6934	773	-0.230607	-0.253495	-2.42519	-2.2609	-2.47706
YBR199W	KTR4	TFIID	32.673	774	-0.157845	-0.0409204	-1.91366	-1.72014	-1.81415
YER006W	NUG1	TFIID	32.6234	775	0.0195065	0.274594	-2.64197	-1.66147	-1.74565
YDL067C	COX9	TFIID	32.6183	776	0.0612946	0.312598	-2.30876	-2.13284	-1.9819
YDR280W	RRP45	TFIID	32.6091	777	0.0565428	0.0978555	-2.27563	-1.86	-1.67572
YHR190W	ERG9	CR	32.563	778	-0.236968	-0.231625	-1.26605	-2.52031	-2.62857
YBL030C	PET9	CR	32.5494	779	-0.210431	0.0566153	-1.1425	-2.53867	-1.98391
YOR209C	NPT1	TFIID	32.5467	780	-0.105064	-0.0540588	-1.87913	-2.06824	-2.15252
YMR015C	ERG5	CR	32.5082	781	-1.55348	-1.33506	-1.17443	-2.40317	-3.4182
YLL029W	FRA1	TFIID	32.4797	782	-0.340747	0.0632192	-2.43173	-2.47281	-2.39835
YPR137W	RRP9	TFIID	32.4567	783	0.034239	0.197764	-2.15984	-1.88346	-1.83435
YGL228W	SHE10	TFIID	32.4333	784	-0.206991	0.084444	-2.15988	-2.2155	-2.04597
YDR293C	SSD1	TFIID	32.4109	785	-0.166615	0.13254	-1.69698	-2.02742	-2.08538
YGL048C	RPT6	TFIID	32.4032	786	-0.256887	-0.0743647	-2.10285	-2.50314	-2.38521
YLR262C-A	TMA7	TFIID	32.373	787	-0.256249	0.0543858	-2.67879	-2.22107	-2.23767
YEL031W	SPF1	TFIID	32.3245	788	-0.301821	-0.0283056	-1.96076	-2.15513	-2.12762
YNL098C	RAS2	TFIID	32.3219	789	-0.390694	-0.0626006	-1.5735	-2.76812	-3.16005
YGR204W	ADE3	CR	32.3109	790	-0.645063	-0.23923	-1.27726	-3.26907	-3.49194
YEL013W	VAC8	TFIID	32.3091	791	-0.00617484	0.123365	-1.77606	-1.71511	-1.74183
YER030W	CHZ1	TFIID	32.2279	792	-0.219847	0.206159	-2.9404	-2.70311	-2.37363
YFL005W	SEC4	TFIID	32.1757	793	-0.211491	-0.00330616	-2.8391	-2.21662	-2.10096
YOL029C	YOL029C	TFIID	32.1537	794	-0.314777	-0.253691	-1.62511	-2.38372	-2.35114
YNL157W	IGO1	TFIID	32.1276	795	-0.0970592	-0.0434124	-1.69956	-1.66966	-1.52365
YCL064C	CHA1	CR	32.1174	796	-0.797257	-1.99233	-0.872456	-1.59329	-1.90654
YMR125W	STO1	TFIID	32.0785	797	-0.0566926	0.125135	-3.66117	-3.36548	-3.18449
YJL061W	NUP82	TFIID	32.0421	798	-0.0393264	0.158839	-2.06888	-2.04163	-1.89426
YOR046C	DBP5	TFIID	32.0207	799	-0.103664	0.082439	-2.61068	-2.03001	-1.80816
YJL138C	TIF2	CR	31.9919	800	-0.116611	-0.0496794	-1.21896	-2.10277	-2.06507
YFR031C-A	RPL2A	TFIID	31.9762	801	-0.217307	-0.0132037	-3.16383	-2.47927	-2.49351
YJR139C	HOM6	TFIID	31.9757	802	-0.254721	-0.24273	-1.93056	-2.22869	-2.03272
YOL004W	SIN3	TFIID	31.9597	803	-0.280647	0.0457436	-2.24592	-2.33088	-2.27145
YPR033C	HTS1	TFIID	31.9285	804	-0.0631206	0.26619	-2.73426	-1.63064	-1.73789
YJL140W	RPB4	TFIID	31.8786	805	0.0524899	0.299604	-1.80307	-1.51888	-1.39316
YER112W	LSM4	TFIID	31.842	806	0.0612139	0.1752	-1.76917	-2.01138	-1.67828
YGL114W	YGL114W	CR	31.8378	807	-0.75903	-0.702817	-0.818206	-2.68314	-2.83125
YOR051C	ETT1	TFIID	31.82	808	-0.233233	-0.00709988	-3.06197	-2.85755	-3.00417
YML129C	COX14	TFIID	31.8037	809	-0.0422019	0.22046	-1.74405	-1.59592	-1.46334
YDR211W	GCD6	TFIID	31.7969	810	-0.113506	0.250738	-2.25491	-1.89591	-1.93799
YKL181W	PRS1	TFIID	31.7727	811	-0.00017648	0.256186	-2.34824	-1.79477	-1.87675
YDL191W	RPL35A	TFIID	31.7623	812	-0.279682	-0.249384	-2.09417	-2.03992	-2.29345
YDR483W	KRE2	TFIID	31.7223	813	-0.205148	-0.0898902	-2.57591	-2.31392	-2.24388
YJL167W	ERG20	CR	31.7201	814	-0.320842	-0.122716	-1.65287	-2.27591	-2.36583
YCR020W-B	HTL1	TFIID	31.7091	815	0.109294	0.076096	-2.26508	-1.60318	-1.71789
YBR279W	PAF1	TFIID	31.6984	816	-0.278152	0.11938	-2.38285	-2.15733	-1.99577
YJL174W	KRE9	TFIID	31.6716	817	-0.371603	-0.0454643	-2.10922	-1.90801	-1.9001
YJR145C	RPS4A	TFIID	31.6376	818	-0.361206	-0.0727852	-2.8539	-2.20264	-2.37547
YOR260W	GCD1	TFIID	31.5731	819	-0.00292941	0.198881	-1.48761	-1.40097	-1.46361
YOR317W	FAA1	TFIID	31.5597	820	-0.730092	-0.556823	-2.16815	-3.25938	-4.30976
YNL037C	IDH1	CR	31.5338	821	-2.20906	-1.54294	0.146091	-2.7265	-1.81359
YER049W	TPA1	TFIID	31.5045	822	-0.233383	-0.257525	-2.26333	-2.74128	-2.8399
YBR031W	RPL4A	TFIID	31.4313	823	-0.343848	-0.096546	-1.82274	-2.45908	-2.54091
YKL016C	ATP7	TFIID	31.4192	824	-0.119269	0.0897669	-2.12036	-1.92987	-1.8543
YOR184W	SER1	CR	31.3767	825	-0.333856	-0.471532	-1.20159	-2.69321	-2.74161
YER141W	COX15	TFIID	31.3668	826	-0.403808	-0.137999	-2.20776	-2.40886	-2.73907
YLR106C	MDN1	TFIID	31.3266	827	-0.0565296	0.123888	-1.96883	-1.4256	-1.64423
YER155C	BEM2	TFIID	31.2933	828	-0.185794	-0.0186068	-2.45468	-2.51944	-2.59934
YGR065C	VHT1	CR	31.2838	829	-0.904007	-1.38227	-1.18654	-1.96019	-2.27068
YDR309C	GIC2	CR	31.2779	830	-0.450291	-0.152061	-1.13266	-2.28796	-2.57046
YER110C	KAP123	TFIID	31.2684	831	-0.137831	0.152388	-2.51173	-1.84659	-1.73703
YHR019C	DED81	TFIID	31.2683	832	-0.133887	0.093327	-2.42769	-1.82299	-1.87402
YDR372C	VPS74	TFIID	31.2129	833	0.168821	0.21621	-1.72338	-1.59623	-1.44112
YBR071W	YBR071W	CR	31.1637	834	-1.31681	-0.900931	-0.519011	-3.00089	-2.67849
YDR308C	SRB7	TFIID	31.1422	835	0.0664551	0.193866	-2.18437	-1.8732	-1.68057
YKL160W	ELF1	TFIID	31.1325	836	-0.126401	0.213182	-2.37896	-2.05535	-1.77821
YDL132W	CDC53	TFIID	31.0903	837	-0.103233	0.0842375	-1.51401	-1.60321	-1.55395
YPR062W	FCY1	TFIID	31.073	838	0.0191708	0.303984	-2.87048	-2.11767	-2.0999
YOR123C	LEO1	TFIID	31.0304	839	-0.196616	0.151354	-2.17609	-2.23044	-2.07117
YDL066W	IDP1	CR	30.9888	840	0.0806995	0.0695183	-0.717129	-1.67473	-1.46681
YBL004W	UTP20	TFIID	30.9525	841	0.00321305	0.15309	-2.39412	-1.74296	-1.76441
YCR028C-A	RIM1	TFIID	30.8882	842	-0.0970356	0.100619	-2.70083	-2.17101	-2.20807
YNL137C	NAM9	TFIID	30.8715	843	0.134918	0.203741	-1.88822	-1.80621	-1.86302
YPL158C	AIM44	CR	30.8694	844	-1.32563	-0.975736	-0.41593	-2.87879	-2.08657
YLR244C	MAP1	TFIID	30.8671	845	-0.264937	-0.138264	-1.80464	-2.60102	-2.70167
YPR028W	YOP1	CR	30.8251	846	-0.434854	-0.432539	-1.73454	-2.48597	-2.72045
YNL084C	END3	TFIID	30.8235	847	-0.14626	0.00971098	-2.16645	-2.10709	-1.85578
YGR270W	YTA7	TFIID	30.8115	848	-0.217948	0.0117134	-2.1724	-2.43811	-2.24355
YOL081W	IRA2	TFIID	30.809	849	-0.219871	-0.0233211	-2.35399	-2.93768	-2.96218
YDR074W	TPS2	CR	30.7883	850	-0.555587	-0.464304	-1.41972	-3.48913	-3.53127
YBL051C	PIN4	TFIID	30.7551	851	-0.10746	0.166086	-1.70888	-1.81038	-1.63933
YGL137W	SEC27	TFIID	30.7213	852	-0.121277	0.100886	-2.16429	-2.26964	-2.07209
YBL047C	EDE1	TFIID	30.7027	853	-0.278068	-0.0537979	-1.95704	-2.24837	-2.08871
YLR196W	PWP1	TFIID	30.7023	854	-0.127736	0.142795	-2.42105	-1.48685	-1.4761
YDL195W	SEC31	TFIID	30.6909	855	-0.330171	-0.0335378	-2.15388	-2.05859	-1.99464
YGL252C	RTG2	TFIID	30.6842	856	-0.230527	-0.145836	-2.02933	-2.08575	-1.97921
YKR066C	CCP1	CR	30.677	857	-0.232745	0.29191	0.102262	-1.72344	-0.416012
YHR208W	BAT1	TFIID	30.6547	858	0.173728	0.49545	-1.16265	-1.82696	-1.97609
YNL307C	MCK1	TFIID	30.6528	859	-0.0709425	-0.0204114	-1.99935	-2.12944	-2.03612
YIR017C	MET28	CR	30.6498	860	-0.371091	-0.12125	0.351588	-2.66723	-1.11009
YPL126W	NAN1	TFIID	30.6393	861	-0.0775008	0.157638	-2.46428	-1.77065	-1.85292
YDR529C	QCR7	TFIID	30.6305	862	0.0128621	0.5186	-1.92878	-1.97349	-1.68258
YDL134C	PPH21	TFIID	30.6293	863	-0.00911166	0.139759	-1.83728	-1.67111	-1.72195
YLR025W	SNF7	TFIID	30.6258	864	-0.0662198	0.218816	-2.0737	-2.08749	-1.77508
YDL136W	RPL35B	TFIID	30.5427	865	-0.386059	-0.193203	-2.38719	-2.0239	-2.29002
YDR168W	CDC37	TFIID	30.5044	866	0.0965413	0.13921	-2.30209	-2.44347	-2.23334
YJR076C	CDC11	TFIID	30.4478	867	-0.296366	-0.109542	-2.4418	-2.57814	-2.37907
YDR025W	RPS11A	TFIID	30.4343	868	-0.170008	0.00416632	-2.56217	-2.02162	-2.04569
YOR194C	TOA1	TFIID	30.4225	869	-0.0740809	0.0194766	-2.20686	-2.13049	-1.91833
YMR311C	GLC8	TFIID	30.4142	870	0.0285856	0.0738575	-2.08947	-1.83243	-1.72825
YGR187C	HGH1	TFIID	30.4047	871	0.0699272	0.145496	-3.33626	-2.59166	-2.38552
YOR014W	RTS1	TFIID	30.393	872	-0.288407	-0.00581827	-1.86792	-1.97851	-1.94818
YHR089C	GAR1	TFIID	30.3667	873	-0.123961	0.0812144	-2.95048	-2.13526	-2.15637
YLR406C	RPL31B	TFIID	30.3369	874	-0.248508	-0.128721	-3.40203	-3.41503	-3.64097
YPL235W	RVB2	TFIID	30.3304	875	-0.151465	0.121491	-2.20825	-2.07787	-1.88145
YLR399C	BDF1	CR	30.3285	876	-0.957375	-0.915999	-0.203335	-2.62308	-2.59422
YPL169C	MEX67	TFIID	30.3192	877	-0.0944429	0.0694961	-1.9102	-2.05182	-1.9059
YBR221C	PDB1	TFIID	30.2547	878	-0.190918	-0.0506807	-2.40377	-2.18214	-2.11143
YMR195W	ICY1	CR	30.2398	879	-0.620813	-0.604632	0.0225383	-2.33392	-1.83185
YMR266W	RSN1	CR	30.1951	880	-0.947502	-1.16989	-1.03148	-3.77304	-3.97883
YFR001W	LOC1	TFIID	30.1793	881	-0.108034	0.185781	-2.67619	-1.83563	-1.83436
YBL079W	NUP170	TFIID	30.173	882	-0.146776	0.0664415	-2.09888	-2.19474	-2.00208
YDL031W	DBP10	TFIID	30.1301	883	0.0079645	0.353012	-2.41836	-1.71406	-1.59891
YLR387C	REH1	TFIID	30.1013	884	-0.0527385	-0.0583326	-1.65789	-2.27561	-2.13075
YFR030W	MET10	TFIID	30.089	885	0.0944969	0.082976	-0.479407	-2.09215	-2.01715
YBR191W	RPL21A	TFIID	30.0825	886	-0.406413	-0.18118	-2.64597	-2.43918	-2.45665
YLR449W	FPR4	TFIID	30.0658	887	-0.203424	0.222801	-2.90058	-2.06386	-2.03508
YGR281W	YOR1	CR	30.0638	888	-0.802698	-1.12814	-1.19999	-3.48339	-3.7448
YDR404C	RPB7	TFIID	30.0339	889	-0.070337	0.154573	-2.06306	-1.75271	-1.65662
YPL063W	TIM50	TFIID	30.0297	890	-0.314636	0.112654	-2.77622	-2.48541	-2.30773
YML108W	YML108W	TFIID	30.0134	891	0.21565	0.104818	-2.73931	-2.31118	-2.21747
YHR205W	SCH9	TFIID	30.0061	892	-0.171397	0.0302005	-2.07248	-2.09574	-2.01976
YDL153C	SAS10	TFIID	29.9977	893	0.025833	0.335422	-2.59487	-1.64405	-1.51715
YLR452C	SST2	CR	29.9693	894	0.0180315	0.00824823	-0.410526	-1.39722	-1.46178
YJL158C	CIS3	CR	29.9676	895	-1.41003	-1.01004	-1.23756	-2.67047	-3.25819
YLL018C	DPS1	TFIID	29.9635	896	-0.103241	0.367188	-2.17955	-1.92154	-1.85047
YDR069C	DOA4	CR	29.9448	897	-0.226063	-0.402415	-1.27268	-1.94965	-2.17872
YBR039W	ATP3	TFIID	29.9323	898	-0.152971	0.0615734	-1.86538	-2.00818	-1.70958
YGL167C	PMR1	TFIID	29.931	899	-0.114643	-0.00260766	-2.08348	-1.9087	-1.81243
YHR068W	DYS1	TFIID	29.9199	900	-0.287525	-0.142152	-2.29864	-2.08297	-2.1748
YBR207W	FTH1	TFIID	29.8945	901	-0.336343	-0.366596	-2.23031	-2.78495	-2.62008
YER125W	RSP5	TFIID	29.8863	902	-0.224811	0.0867208	-2.19192	-2.32459	-2.16107
YDR303C	RSC3	TFIID	29.8817	903	-0.0133863	0.152823	-1.90571	-2.34743	-2.03903
YGL092W	NUP145	TFIID	29.852	904	-0.1726	0.037382	-2.23083	-2.32464	-2.18609
YJL123C	MTC1	TFIID	29.8408	905	-0.187043	0.16865	-2.51471	-2.50949	-2.3991
YOL097C	WRS1	TFIID	29.8348	906	0.0651017	0.293813	-2.98485	-2.1954	-1.95983
YOR362C	PRE10	TFIID	29.8323	907	-0.289303	-0.139534	-2.4253	-2.28649	-2.21984
YKL007W	CAP1	TFIID	29.8127	908	-0.184144	0.111396	-2.05257	-2.1005	-1.9061
YHR066W	SSF1	TFIID	29.8119	909	-0.0524095	0.28631	-2.40632	-1.47916	-1.40965
YGR119C	NUP57	TFIID	29.7806	910	-0.0833282	0.211627	-1.82373	-1.75693	-1.67261
YDR324C	UTP4	TFIID	29.7799	911	-0.0386235	0.297853	-2.80984	-2.21438	-2.04166
YGL202W	ARO8	TFIID	29.7779	912	-0.20685	0.0244606	-2.31049	-1.83277	-1.91185
YDR322C-A	TIM11	TFIID	29.7643	913	-0.082423	0.141056	-2.18778	-2.44224	-2.01193
YKL195W	MIA40	TFIID	29.7536	914	-0.180475	0.0653735	-2.09982	-2.30159	-2.12786
YDR052C	DBF4	TFIID	29.753	915	-0.262995	0.0388731	-2.09011	-2.27666	-2.18807
YDR245W	MNN10	TFIID	29.7428	916	-0.0954631	-0.138677	-2.2813	-2.31422	-2.38793
YML008C	ERG6	CR	29.7202	917	-1.35145	-1.06893	-2.40822	-3.3252	-4.2581
YMR083W	ADH3	TFIID	29.6877	918	-0.605138	-0.412736	-2.30885	-2.74862	-3.51347
YBR172C	SMY2	TFIID	29.6723	919	0.0402301	0.225383	-1.86543	-1.66644	-1.66061
YJR137C	MET5	TFIID	29.6699	920	-0.0575608	0.321347	0.0558055	-2.76776	-2.39578
YML053C	YML053C	TFIID	29.6585	921	-0.0352018	0.421031	-2.08229	-2.63708	-2.02542
YDL100C	GET3	TFIID	29.5805	922	-0.200279	0.0350118	-2.31016	-2.45698	-2.27514
YLR208W	SEC13	TFIID	29.5714	923	-0.178585	0.0323741	-1.92909	-2.00402	-1.80253
YDR145W	TAF12	TFIID	29.5655	924	0.00552904	0.227811	-2.0245	-1.84606	-1.62381
YDR412W	RRP17	TFIID	29.513	925	-0.0552241	0.220779	-2.65188	-2.03391	-1.88133
YHR098C	SFB3	TFIID	29.5056	926	-0.366281	-0.190386	-2.7105	-2.9262	-2.78122
YGR284C	ERV29	TFIID	29.4869	927	-0.216937	-0.0740092	-2.68026	-2.84387	-2.70239
YML117W	NAB6	TFIID	29.463	928	-0.347541	-0.169584	-2.2512	-2.67964	-2.58403
YIL109C	SEC24	TFIID	29.4604	929	-0.419195	-0.0836948	-2.30499	-2.4624	-2.44876
YOR182C	RPS30B	TFIID	29.4463	930	-0.0453274	-0.120829	-2.2894	-2.21017	-2.41773
YML072C	TCB3	TFIID	29.418	931	-0.332219	-0.0391897	-2.51319	-2.48097	-2.53728
YDL205C	HEM3	CR	29.3306	932	-0.0419084	0.038932	-0.673453	-1.68154	-1.7678
YDR208W	MSS4	TFIID	29.3103	933	-0.252557	-0.00200177	-2.16328	-2.48024	-2.19691
YLR403W	SFP1	TFIID	29.2906	934	-0.282863	-0.254945	-1.69671	-2.36202	-2.38429
YNL302C	RPS19B	TFIID	29.2869	935	-0.232745	-0.0736098	-2.47346	-2.38236	-2.33946
YOR058C	ASE1	TFIID	29.2528	936	-0.038734	-0.213027	-1.56316	-2.87458	-2.74328
YDR251W	PAM1	TFIID	29.2341	937	-0.272948	-0.169872	-2.29513	-2.72918	-2.67712
YDR361C	BCP1	TFIID	29.2329	938	-0.0746668	0.0386595	-2.64543	-2.31447	-2.62918
YDR170C	SEC7	TFIID	29.2184	939	-0.143435	0.0538574	-2.25386	-2.3807	-2.07402
YHR023W	MYO1	TFIID	29.2181	940	-0.167592	-0.0626898	-2.76949	-2.51824	-3.0178
YPL218W	SAR1	TFIID	29.2171	941	-0.279341	0.024836	-2.27095	-1.85873	-1.71499
YLR309C	IMH1	TFIID	29.2044	942	-0.0304284	0.206623	-2.19572	-2.29802	-1.99102
YHR010W	RPL27A	TFIID	29.1368	943	-0.224914	-0.119706	-2.2801	-1.86299	-2.17188
YJR073C	OPI3	CR	29.107	944	-1.58182	-0.941902	-1.94939	-3.23931	-3.2088
YLR192C	HCR1	TFIID	29.1004	945	-0.293684	-7.96e-05	-2.9237	-2.16802	-2.06897
YDL004W	ATP16	TFIID	29.0796	946	-0.198579	0.0609369	-2.49971	-2.10228	-1.90204
YJR002W	MPP10	TFIID	29.077	947	-0.00184874	0.208813	-2.32395	-2.06028	-1.85588
YMR033W	ARP9	TFIID	29.0571	948	-0.0450323	0.074252	-1.59287	-1.90023	-1.69436
YNL247W	YNL247W	TFIID	29.0515	949	-0.130822	0.130298	-2.01145	-1.77286	-1.77761
YOR047C	STD1	CR	29.0487	950	-0.148437	-0.0256432	-1.14058	-1.43847	-1.81215
YGL026C	TRP5	TFIID	29.0353	951	0.0331276	0.184063	-2.1364	-2.03171	-2.04071
YCR002C	CDC10	TFIID	29.0324	952	-0.0489942	-0.0170914	-2.25693	-1.7934	-1.85743
YLR435W	TSR2	TFIID	29.0037	953	0.0130939	0.261776	-2.66706	-1.86537	-1.79379
YGR189C	CRH1	CR	28.9816	954	-0.890883	-0.701025	-1.14324	-2.73899	-2.85993
YDL015C	TSC13	TFIID	28.9768	955	-0.254543	-0.113117	-2.49352	-2.1013	-2.14347
YDR457W	TOM1	TFIID	28.972	956	-0.0250516	0.19658	-1.64824	-1.8701	-1.72735
YKL135C	APL2	TFIID	28.9715	957	-0.1457	0.0920351	-2.02887	-2.08856	-1.90942
YKL142W	MRP8	TFIID	28.9261	958	-0.257243	-0.527005	-2.24162	-2.62091	-2.68579
YJR065C	ARP3	TFIID	28.9208	959	-0.253525	0.0626282	-1.94701	-1.95593	-1.84943
YKL086W	SRX1	CR	28.9188	960	-1.43133	-0.643707	0.406172	-1.37182	-0.394616
YDL051W	LHP1	TFIID	28.8883	961	-0.0477897	0.294839	-2.67577	-2.01822	-1.7812
YLR129W	DIP2	TFIID	28.8827	962	-0.00699621	0.186718	-2.48149	-1.9295	-1.78301
YKL014C	URB1	TFIID	28.8733	963	0.0193567	0.196091	-2.08633	-1.6957	-1.6529
YJL039C	NUP192	TFIID	28.8215	964	-0.139684	0.00264555	-2.03861	-2.14988	-1.99662
YJL122W	ALB1	TFIID	28.8094	965	0.149395	0.352162	-2.85471	-1.92752	-1.79328
YGL070C	RPB9	TFIID	28.7618	966	0.163174	0.171421	-1.89519	-1.42216	-1.3259
YLL051C	FRE6	TFIID	28.7556	967	-0.681238	-0.444377	-1.83682	-2.52633	-2.67457
YER180C-A	SLO1	TFIID	28.735	968	-0.165664	0.0835217	-2.50462	-3.00943	-2.92358
YER042W	MXR1	CR	28.7157	969	-0.513349	-0.52596	-0.625201	-2.59874	-2.38546
YDL161W	ENT1	TFIID	28.704	970	-0.210681	0.0370458	-2.16477	-2.50498	-2.31776
YKL077W	YKL077W	TFIID	28.6773	971	-0.309549	-0.00899986	-2.51841	-2.4204	-2.47277
YLR170C	APS1	TFIID	28.6718	972	-0.10271	0.0166048	-2.57056	-2.3525	-2.14829
YMR216C	SKY1	TFIID	28.6428	973	-0.135508	-0.00971391	-2.00839	-2.25924	-2.18679
YLR223C	IFH1	TFIID	28.6196	974	-0.0132758	0.222319	-1.81395	-1.73601	-1.75252
YNL271C	BNI1	TFIID	28.612	975	-0.151541	0.0767624	-2.23383	-2.26067	-2.08945
YGL225W	VRG4	TFIID	28.6088	976	-0.461293	-0.166919	-1.96653	-2.40674	-2.75782
YLR206W	ENT2	TFIID	28.6	977	-0.229345	0.12017	-1.83807	-2.2137	-1.98458
YER117W	RPL23B	TFIID	28.5996	978	-0.156436	0.0234207	-2.46952	-2.71605	-2.70589
YNR035C	ARC35	TFIID	28.5926	979	-0.205679	0.133703	-2.18502	-2.40239	-2.2584
YGL117W	YGL117W	CR	28.5728	980	-0.479589	-0.829188	-1.00159	-2.98942	-2.78805
YOR187W	TUF1	TFIID	28.5149	981	-0.2214	0.0854725	-2.5754	-2.4759	-2.33913
YMR109W	MYO5	TFIID	28.5112	982	-0.179265	-0.0136507	-1.93856	-2.14111	-2.12444
YNL213C	RRG9	TFIID	28.5066	983	-0.0159662	-0.13566	-1.43085	-1.71877	-1.83322
YNL055C	POR1	CR	28.4969	984	-0.736058	-0.679578	-1.47683	-3.19792	-2.99056
YOL038W	PRE6	TFIID	28.487	985	-0.371186	-0.160972	-1.75786	-2.13784	-2.18459
YER161C	SPT2	TFIID	28.4439	986	-0.151374	0.170916	-2.07968	-2.10445	-1.7522
YJL179W	PFD1	TFIID	28.4318	987	0.31858	0.419882	-2.46174	-1.85595	-1.65017
YLR225C	YLR225C	CR	28.4243	988	-0.455253	-0.243993	-0.731524	-2.93613	-2.63678
YLL048C	YBT1	TFIID	28.4163	989	0.0398431	0.18104	-1.97538	-1.77935	-1.80624
YDR300C	PRO1	TFIID	28.3997	990	-0.0509256	0.0319667	-2.27493	-2.19033	-1.574
YPR133C	SPN1	TFIID	28.3751	991	-0.0237245	0.178412	-1.68066	-1.62608	-1.62415
YHL047C	ARN2	CR	28.2679	992	-1.97318	-1.06375	-1.81023	-3.0756	-3.54842
YML048W	GSF2	CR	28.2425	993	-0.227941	0.0439792	-1.21752	-2.55402	-2.42802
YOL076W	MDM20	TFIID	28.2133	994	-0.0749359	0.0549687	-1.8608	-2.04431	-1.94238
YPR173C	VPS4	TFIID	28.2132	995	-0.186212	0.129691	-2.09349	-2.19708	-2.05357
YIL128W	MET18	TFIID	28.16	996	-0.10295	0.171305	-1.91408	-2.23071	-1.96177
YLR378C	SEC61	TFIID	28.158	997	-0.353484	-0.0752941	-2.64549	-2.55407	-2.65395
YKR001C	VPS1	TFIID	28.1394	998	-0.236313	0.0458223	-2.00777	-2.45645	-2.1941
YHR081W	LRP1	TFIID	28.1125	999	-0.0634602	0.220169	-2.34888	-1.6044	-1.50007
YNL175C	NOP13	TFIID	28.1063	1000	-0.146182	-0.149145	-3.13472	-1.68266	-1.93517
YFR009W	GCN20	TFIID	28.101	1001	-0.105736	0.214862	-2.57321	-2.60217	-2.38893
YDL022W	GPD1	CR	28.0632	1002	-1.61321	-1.50942	-1.18889	-4.78619	-5.35672
YGL068W	MNP1	TFIID	28.0181	1003	-0.186106	0.206312	-2.00277	-1.92724	-1.74376
YBR112C	CYC8	TFIID	28.0175	1004	-0.297173	-0.12109	-2.6504	-3.05872	-3.3487
YMR080C	NAM7	TFIID	28.0014	1005	-0.151253	0.116808	-2.0993	-1.81067	-1.75703
YGR214W	RPS0A	TFIID	27.9994	1006	-0.272747	-0.0337244	-2.32969	-1.8801	-2.10944
YPR029C	APL4	TFIID	27.965	1007	-0.141894	0.0313913	-1.9557	-2.21062	-2.01508
YER086W	ILV1	TFIID	27.9273	1008	0.0908972	0.240426	-2.21145	-1.87522	-1.84234
YMR200W	ROT1	TFIID	27.9145	1009	-0.0698637	0.194396	-2.08771	-2.0756	-2.07612
YDR432W	NPL3	TFIID	27.9104	1010	-0.585709	-0.387551	-1.70024	-2.29249	-2.3371
YCR035C	RRP43	TFIID	27.8989	1011	-0.0102112	0.218125	-2.27332	-2.62068	-2.3267
YMR031C	EIS1	CR	27.8948	1012	-0.736458	-0.395256	-1.96182	-2.93986	-3.38515
YLR250W	SSP120	TFIID	27.8848	1013	-0.153969	-0.0136189	-2.68159	-2.21598	-2.31528
YKR035W-A	DID2	TFIID	27.8848	1014	-0.0128335	0.150416	-2.26011	-2.02558	-2.0217
YIL027C	EMC5	TFIID	27.8786	1015	-0.0270167	0.228366	-2.05934	-1.55124	-1.59484
YHL040C	ARN1	CR	27.8676	1016	-2.18683	-1.14117	-0.210191	-1.67216	-1.40065
YCR016W	YCR016W	TFIID	27.8451	1017	-0.0575848	0.121575	-2.55155	-1.91478	-1.75342
YGR271C-A	EFG1	TFIID	27.8428	1018	0.198957	0.244607	-2.3556	-1.87321	-1.75808
YDL121C	YDL121C	TFIID	27.8414	1019	0.234628	0.220085	-2.51419	-1.57859	-1.45938
YPR148C	YPR148C	TFIID	27.8159	1020	-0.113389	0.111354	-2.98124	-2.88737	-2.79904
YLR330W	CHS5	TFIID	27.778	1021	-0.19187	0.10711	-2.20978	-2.23509	-2.1787
YLR222C	UTP13	TFIID	27.7551	1022	0.0364351	0.285575	-2.3971	-1.83096	-1.77264
YDR510W	SMT3	TFIID	27.7371	1023	-0.41549	-0.114689	-2.65672	-2.17005	-2.23776
YIL040W	APQ12	TFIID	27.7277	1024	-0.0423142	0.0935873	-2.84432	-2.32726	-2.25036
YDL002C	NHP10	TFIID	27.7144	1025	-0.0761145	-0.183781	-2.53698	-2.69525	-2.79365
YNR001C	CIT1	CR	27.7099	1026	-0.813725	-0.6328	-0.230964	-2.56507	-2.44171
YDL099W	BUG1	TFIID	27.669	1027	-0.0647314	0.0985937	-2.15988	-2.3442	-2.04997
YDR339C	FCF1	TFIID	27.6644	1028	0.00300496	0.0973912	-2.04584	-1.86244	-1.83595
YMR043W	MCM1	CR	27.6527	1029	-0.458796	-0.160743	-1.43484	-2.53972	-2.96938
YML069W	POB3	TFIID	27.6356	1030	-0.137104	0.114994	-1.95629	-1.97554	-1.73918
YLR168C	UPS2	CR	27.6251	1031	-0.438143	-0.318318	-0.26068	-2.1094	-1.96832
YML010W	SPT5	TFIID	27.6243	1032	-0.131287	0.272342	-1.99218	-2.00572	-1.83111
YLL009C	COX17	TFIID	27.6173	1033	0.213397	0.366534	-2.12539	-2.20173	-2.07052
YEL015W	EDC3	TFIID	27.6081	1034	-0.270117	0.0820669	-1.90684	-1.8911	-1.65911
YLL008W	DRS1	TFIID	27.5955	1035	-0.0995149	0.40791	-2.62555	-1.76895	-1.64721
YBR173C	UMP1	TFIID	27.5888	1036	-0.186744	0.0633612	-1.91782	-2.2956	-2.0875
YIL130W	ASG1	TFIID	27.5248	1037	-0.0300031	0.0981634	-2.17742	-2.32197	-2.13171
YGR083C	GCD2	TFIID	27.5071	1038	-0.032194	0.282491	-2.30552	-2.05478	-1.8307
YOR028C	CIN5	CR	27.4565	1039	-1.0111	-0.603223	-0.196979	-2.22709	-1.52183
YER138W-A	YER138W-A	CR	27.4526	1040	-0.741459	-0.551401	-0.739922	-2.75279	-1.1019
YIL074C	SER33	TFIID	27.424	1041	-0.27712	0.0325368	-0.891937	-3.12499	-3.00533
YJR064W	CCT5	TFIID	27.3962	1042	-0.10905	0.0893079	-2.04942	-2.30535	-2.15493
YOR239W	ABP140	TFIID	27.3637	1043	-0.14996	-0.0508555	-2.33258	-2.66216	-2.53231
YMR049C	ERB1	TFIID	27.3597	1044	-0.209412	0.203941	-2.66283	-1.91363	-1.92661
YNL186W	UBP10	TFIID	27.3011	1045	-0.208569	-0.0906639	-2.77044	-2.8226	-3.01152
YGR105W	VMA21	TFIID	27.2569	1046	0.00889143	0.241484	-2.38289	-2.36089	-1.97033
YPL010W	RET3	TFIID	27.2416	1047	-0.025013	0.0739378	-2.16172	-1.96124	-1.77309
YPR112C	MRD1	TFIID	27.2185	1048	0.039624	0.312436	-2.38471	-1.41681	-1.43083
YBR248C	HIS7	TFIID	27.205	1049	0.234147	0.286095	-1.94159	-1.89587	-1.63698
YNL077W	APJ1	TFIID	27.2048	1050	-0.0167481	0.186271	-1.96452	-3.13652	-3.24173
YOR020W-A	YOR020W-A	TFIID	27.2043	1051	-0.297365	-0.138248	-2.89802	-3.06411	-2.90328
YPL032C	SVL3	TFIID	27.1954	1052	-0.388329	-0.261931	-3.00886	-2.90814	-3.3147
YDL225W	SHS1	TFIID	27.1898	1053	-0.00739751	0.104278	-2.15384	-2.01581	-1.8516
YGR180C	RNR4	CR	27.1598	1054	-0.665324	-0.678776	-1.86173	-3.02794	-3.28604
YKL212W	SAC1	TFIID	27.1539	1055	-0.227584	-0.0379789	-2.34954	-2.05658	-2.10904
YMR290C	HAS1	TFIID	27.1518	1056	-0.167134	0.135843	-2.82926	-1.94752	-1.93729
YLR256W	HAP1	CR	27.1333	1057	-0.789092	-0.949092	-1.34516	-4.11287	-3.85235
YJR090C	GRR1	TFIID	27.1249	1058	-0.0116438	0.0271143	-1.56891	-1.82563	-1.63098
YBR048W	RPS11B	CR	27.12	1059	-0.110328	0.138582	-1.8503	-1.22881	-1.21629
YHR088W	RPF1	TFIID	27.0995	1060	0.0636171	0.217146	-2.37042	-1.63859	-1.58055
YHL036W	MUP3	CR	27.0929	1061	-0.948491	-0.952185	-0.0826796	-2.66317	-2.22496
YIL036W	CST6	TFIID	27.0421	1062	0.0151729	0.0413402	-1.88517	-1.88551	-1.78964
YBL105C	PKC1	TFIID	27.0369	1063	0.00609828	0.148581	-1.79968	-1.92391	-1.65428
YJR044C	VPS55	TFIID	27.0329	1064	-0.238052	-0.0361171	-2.35318	-2.18407	-1.91216
YNL176C	TDA7	CR	27.0008	1065	-0.897499	-0.818264	-1.591	-2.29361	-2.98228
YOR158W	PET123	TFIID	26.9932	1066	0.0227907	0.135285	-1.99675	-1.95153	-1.78288
YKL175W	ZRT3	TFIID	26.9909	1067	-0.765528	-0.468874	-1.26071	-2.25804	-2.46055
YGL086W	MAD1	TFIID	26.9867	1068	0.027396	0.0723599	-1.83716	-1.82075	-1.52175
YER105C	NUP157	TFIID	26.9813	1069	-0.15678	0.172565	-2.03071	-2.15995	-1.85915
YEL022W	GEA2	TFIID	26.9593	1070	-0.0638038	0.125789	-1.99058	-2.03771	-1.83503
YBR017C	KAP104	TFIID	26.9534	1071	-0.123886	0.129702	-2.16956	-1.99207	-1.88722
YPR144C	NOC4	TFIID	26.9291	1072	-0.0943802	0.139124	-2.7314	-1.69585	-1.61027
YBR171W	SEC66	TFIID	26.9237	1073	0.0912919	-0.0087891	-2.36486	-2.29935	-1.95886
YDL088C	ASM4	TFIID	26.8991	1074	0.103183	0.172885	-1.44362	-1.71663	-1.45437
YEL002C	WBP1	TFIID	26.8575	1075	-0.0782133	-0.00813296	-2.38055	-2.18273	-2.01893
YHR039C-A	VMA10	TFIID	26.8158	1076	-0.097772	-0.154135	-2.53955	-2.00559	-2.23618
YNL123W	NMA111	TFIID	26.8053	1077	-0.137245	0.0747351	-2.20476	-2.46357	-2.48609
YIL144W	NDC80	TFIID	26.7818	1078	-0.0178041	-0.0828831	-1.64125	-1.94096	-1.68421
YFL034C-A	RPL22B	TFIID	26.7558	1079	-0.0649034	-0.113849	-2.072	-2.07729	-2.55993
YNL177C	MRPL22	TFIID	26.6928	1080	0.134283	0.214704	-2.03468	-1.6039	-1.59691
YLR153C	ACS2	CR	26.682	1081	-0.730058	-0.232776	-1.68301	-2.80642	-2.95634
YPR048W	TAH18	TFIID	26.6558	1082	-0.124288	0.03047	-1.51556	-2.26026	-2.21231
YPL217C	BMS1	TFIID	26.6528	1083	-0.14236	0.241205	-2.63632	-2.12957	-2.07768
YLR200W	YKE2	TFIID	26.6506	1084	0.117279	0.20562	-2.40446	-2.14404	-2.0126
YJL076W	NET1	TFIID	26.5853	1085	-0.201941	0.0867174	-2.24799	-2.0638	-1.94791
YER056C-A	RPL34A	TFIID	26.5781	1086	-0.137812	-0.123266	-3.08038	-2.54143	-2.57717
YLR163C	MAS1	TFIID	26.5387	1087	-0.307497	-0.0809821	-1.99471	-2.02902	-1.93159
YLR022C	SDO1	TFIID	26.5161	1088	0.141783	0.230071	-3.05933	-2.40525	-2.19074
YER068W	MOT2	TFIID	26.5144	1089	-0.189403	0.0167976	-1.93718	-1.93849	-1.85339
YPR060C	ARO7	TFIID	26.5036	1090	-0.00900025	0.213183	-2.65042	-2.15911	-2.26255
YHL020C	OPI1	TFIID	26.4875	1091	-0.483194	-0.1582	-2.17964	-2.19227	-2.17549
YDL005C	MED2	TFIID	26.4752	1092	-0.162817	0.0693847	-2.35646	-2.17369	-1.93586
YIL105C	SLM1	TFIID	26.4727	1093	-0.113343	0.0984988	-1.56659	-1.95735	-1.65623
YMR010W	YMR010W	TFIID	26.4715	1094	-0.245502	-0.096538	-2.30131	-2.18474	-2.40376
YAL029C	MYO4	TFIID	26.4537	1095	-0.096277	0.0835077	-2.54663	-2.37539	-2.22303
YJL026W	RNR2	CR	26.4405	1096	-0.534632	-0.583477	-1.88556	-2.99528	-3.33286
YGR009C	SEC9	TFIID	26.433	1097	-0.134489	0.0955097	-1.58196	-2.29574	-2.07226
YMR090W	YMR090W	CR	26.4069	1098	-0.895834	-1.18897	-0.266204	-3.55577	-2.69053
YOL028C	YAP7	TFIID	26.3836	1099	-0.155319	0.00680342	-1.30313	-2.08637	-2.12432
YIL076W	SEC28	TFIID	26.3765	1100	-0.155448	0.0938164	-2.24794	-2.38607	-2.27177
YBL058W	SHP1	TFIID	26.3499	1101	-0.26629	0.011234	-1.80173	-2.0378	-1.91801
YBR047W	FMP23	TFIID	26.3433	1102	-0.648437	-0.587194	-2.76265	-3.84546	-4.21054
YBR069C	TAT1	CR	26.3251	1103	-1.80828	-1.52278	-1.29415	-2.6518	-2.93229
YOL036W	YOL036W	TFIID	26.314	1104	-0.031307	0.0422555	-1.49088	-2.01015	-2.0045
YER050C	RSM18	TFIID	26.3129	1105	-0.0239448	0.550049	-1.86704	-1.853	-1.66735
YCR084C	TUP1	TFIID	26.303	1106	-0.319884	0.116062	-2.50902	-2.76059	-2.50421
YOL064C	MET22	TFIID	26.2931	1107	0.347548	0.405509	-2.3094	-3.545	-3.25964
YLR034C	SMF3	CR	26.2424	1108	-0.107432	-0.250067	-1.07206	-2.3454	-2.31472
YPR101W	SNT309	TFIID	26.2356	1109	0.230844	0.0798459	-1.29272	-1.15591	-1.10864
YLR229C	CDC42	TFIID	26.2084	1110	-0.333778	0.243222	-2.68951	-2.35495	-2.22643
YJR070C	LIA1	TFIID	26.1828	1111	-0.424999	0.0900116	-2.39116	-2.39307	-2.36302
YPR168W	NUT2	TFIID	26.1778	1112	0.13432	-0.0875323	-2.31382	-2.15684	-2.2271
YLR287C	YLR287C	TFIID	26.1754	1113	0.0481083	0.0610426	-2.31553	-2.02546	-2.11039
YKL032C	IXR1	TFIID	26.1545	1114	-0.251814	0.3152	-2.75516	-2.31315	-2.19785
YGR233C	PHO81	TFIID	26.1189	1115	-0.254911	-0.0678273	-2.29107	-2.77958	-3.08364
YDR354W	TRP4	TFIID	26.1099	1116	-0.328958	-0.0194358	-2.15825	-1.78529	-1.557
YJR004C	SAG1	CR	26.0543	1117	-0.302491	-0.155422	-2.46542	-2.45941	-2.2369
YKR016W	MIC60	TFIID	26.0317	1118	-0.108283	0.0789656	-2.30131	-2.25897	-1.92598
YGL071W	AFT1	TFIID	26.0263	1119	-0.626524	-0.247042	-1.38804	-2.86832	-2.86232
YLL039C	UBI4	CR	25.9944	1120	-0.706739	-0.859919	-0.714015	-2.70064	-3.41214
YER094C	PUP3	TFIID	25.959	1121	-0.410657	0.0304753	-2.13766	-1.90232	-1.86758
YDL065C	PEX19	TFIID	25.9568	1122	-0.0696307	0.391963	-1.85036	-2.25446	-1.98442
YOR141C	ARP8	TFIID	25.956	1123	-0.0692108	0.110041	-2.0471	-2.1766	-1.86555
YLL027W	ISA1	CR	25.9212	1124	-0.0397278	0.365007	-0.116545	-1.82055	-1.33996
YER120W	SCS2	TFIID	25.8843	1125	-0.495879	0.0558624	-2.44168	-2.30549	-2.00314
YOR045W	TOM6	TFIID	25.8765	1126	-0.456188	0.0416803	-2.65132	-1.80386	-1.58162
YBR046C	ZTA1	CR	25.864	1127	-0.607748	-0.841912	-1.41967	-3.93647	-4.17456
YKR068C	BET3	TFIID	25.8597	1128	-0.12602	0.0987019	-2.18613	-1.83418	-1.76944
YDL155W	CLB3	TFIID	25.8378	1129	-0.217714	0.0436324	-2.25553	-2.44969	-2.34474
YOR116C	RPO31	TFIID	25.8217	1130	-0.0370083	0.206098	-2.57669	-2.18469	-2.20583
YJL166W	QCR8	TFIID	25.8102	1131	0.0661132	0.143029	-2.0054	-2.02197	-2.0825
YDL106C	PHO2	TFIID	25.8089	1132	-0.0723553	0.234141	-1.50061	-1.92345	-1.54057
YER151C	UBP3	TFIID	25.8009	1133	-0.244457	-0.0240076	-2.4198	-2.57092	-2.33942
YDR525W-A	SNA2	TFIID	25.7999	1134	-0.353863	-0.209944	-2.85538	-2.63884	-3.78843
YBR164C	ARL1	TFIID	25.7208	1135	-0.0530616	0.116407	-2.11581	-2.2148	-2.19144
YDR129C	SAC6	TFIID	25.6458	1136	-0.302737	-0.180345	-2.32063	-2.75122	-2.69705
YDL190C	UFD2	TFIID	25.6428	1137	0.0671286	0.226794	-1.76011	-1.89794	-1.65132
YDR449C	UTP6	TFIID	25.6424	1138	0.195924	0.319969	-1.73443	-1.44325	-1.38894
YMR091C	NPL6	TFIID	25.6284	1139	-0.0382297	0.243133	-2.20058	-1.87262	-1.64083
YDR356W	SPC110	TFIID	25.5974	1140	-0.268351	-0.128353	-2.22469	-2.74509	-2.61036
YDR266C	HEL2	TFIID	25.5845	1141	0.0289798	0.208907	-2.28529	-2.08217	-1.89057
YEL055C	POL5	TFIID	25.5759	1142	-0.0544811	0.194365	-3.01931	-2.69694	-2.82786
YGL120C	PRP43	TFIID	25.5707	1143	-0.161556	0.123531	-2.54785	-1.998	-2.03663
YMR014W	BUD22	TFIID	25.5591	1144	-0.106699	0.345144	-2.43712	-1.66431	-1.50673
YKR043C	SHB17	TFIID	25.5436	1145	-0.164413	0.318268	-2.40647	-1.93603	-2.22431
YDR292C	SRP101	TFIID	25.5417	1146	-0.020676	0.240902	-2.31602	-2.27894	-2.12678
YDR165W	TRM82	TFIID	25.4779	1147	0.0275235	0.130187	-2.7788	-2.03336	-1.8742
YLR027C	AAT2	CR	25.4732	1148	-0.20282	0.114963	-0.810462	-2.33084	-2.07161
YDR188W	CCT6	TFIID	25.4597	1149	-0.386687	0.0907364	-2.6522	-2.5429	-2.55233
YLR335W	NUP2	TFIID	25.4555	1150	-0.189952	0.131194	-2.90272	-2.83935	-2.61633
YNL243W	SLA2	TFIID	25.4089	1151	-0.282355	-0.14567	-2.33308	-2.62668	-2.55813
YOR195W	SLK19	TFIID	25.4048	1152	-0.1849	-0.00979852	-1.81842	-2.51605	-2.36109
YBR198C	TAF5	TFIID	25.396	1153	-0.130197	0.239402	-1.84537	-1.90259	-1.53888
YJL144W	YJL144W	CR	25.3788	1154	-0.460317	-0.379288	-2.15712	-4.75116	-4.04438
YNL267W	PIK1	TFIID	25.3696	1155	-0.132334	0.0628617	-2.18973	-2.24014	-2.17432
YPR086W	SUA7	TFIID	25.3408	1156	-0.0698586	0.10902	-1.45135	-1.74146	-1.79944
YLL011W	SOF1	TFIID	25.3116	1157	0.0587984	0.365945	-2.19843	-1.75187	-1.65727
YPR167C	MET16	TFIID	25.3087	1158	-0.365032	-0.309063	-0.147665	-2.76582	-2.76806
YLR083C	EMP70	TFIID	25.2949	1159	-0.258644	0.201392	-2.46236	-2.21182	-2.16982
YNL169C	PSD1	CR	25.2861	1160	-0.62851	-0.596917	-1.57602	-3.38597	-3.66591
YPL129W	TAF14	TFIID	25.2812	1161	-0.00176674	0.208099	-1.92112	-1.51084	-1.35408
YGR089W	NNF2	TFIID	25.2611	1162	-0.00549174	0.0986666	-1.58241	-1.75617	-1.6984
YOR281C	PLP2	TFIID	25.2546	1163	-0.222918	0.104373	-2.50753	-2.42865	-2.35213
YOL061W	PRS5	TFIID	25.2494	1164	-0.105527	0.0903184	-2.66601	-2.13242	-1.93515
YGR026W	YGR026W	TFIID	25.2352	1165	-0.246172	-0.0802397	-2.39519	-2.42099	-2.75074
YMR197C	VTI1	TFIID	25.2222	1166	0.0343625	0.0994226	-1.74576	-1.9533	-1.7539
YGR061C	ADE6	TFIID	25.217	1167	-0.355477	-0.202077	-2.47545	-2.0518	-2.47434
YOR061W	CKA2	TFIID	25.2103	1168	-0.0918036	0.160609	-2.47323	-2.14407	-2.15573
YML018C	YML018C	TFIID	25.2081	1169	-0.223522	0.00867713	-2.05369	-2.37213	-2.59064
YNR061C	YNR061C	TFIID	25.1891	1170	-0.26509	-0.0452734	-2.69952	-2.32303	-2.08072
YLR436C	ECM30	TFIID	25.1713	1171	-0.273385	-0.039097	-2.42373	-3.14927	-2.88278
YDR186C	YDR186C	TFIID	25.1496	1172	-0.10368	0.0795532	-1.58874	-2.73636	-2.91726
YNL059C	ARP5	TFIID	25.1492	1173	-0.0982468	0.0760748	-2.01919	-1.96558	-1.8128
YGL115W	SNF4	TFIID	25.1472	1174	-0.357195	0.176978	-2.11801	-1.83738	-1.83521
YCL035C	GRX1	TFIID	25.1434	1175	-0.252511	0.123808	-1.63261	-2.61469	-2.57
YNL103W	MET4	TFIID	25.1199	1176	-0.173728	0.10444	-1.94549	-1.83967	-1.66519
YBR247C	ENP1	TFIID	25.1196	1177	-0.0777685	0.373529	-2.9542	-1.77627	-1.85144
YDL224C	WHI4	TFIID	25.1164	1178	-0.0963774	0.129302	-1.60668	-1.95988	-1.76319
YPL009C	RQC2	TFIID	25.109	1179	-0.108738	0.112103	-2.31838	-2.38761	-2.23219
YNL032W	SIW14	TFIID	25.1033	1180	0.0663307	0.0838986	-2.6945	-2.2205	-2.13605
YDR101C	ARX1	TFIID	25.1028	1181	-0.163006	0.30793	-2.55509	-1.62813	-1.68943
YER019C-A	SBH2	TFIID	25.1003	1182	-0.344211	0.185038	-2.15791	-2.09763	-2.07069
YLR384C	IKI3	TFIID	25.0936	1183	-0.0372432	0.288916	-2.18757	-1.81192	-1.74372
YJR005W	APL1	TFIID	25.0898	1184	0.0346551	0.142246	-1.60498	-1.95638	-1.7239
YOR147W	MDM32	TFIID	25.0788	1185	0.147785	0.223793	-1.75512	-1.56921	-1.49963
YPR113W	PIS1	CR	25.055	1186	-0.372993	-0.314387	-1.77843	-2.26674	-2.6022
YAR002C-A	ERP1	TFIID	25.0334	1187	-0.420402	0.144417	-2.21769	-2.28494	-2.36272
YIL052C	RPL34B	TFIID	25.0159	1188	-0.285958	0.027217	-2.59643	-2.28781	-2.26351
YOR098C	NUP1	TFIID	25.0104	1189	-0.0860681	0.214646	-2.1148	-2.0376	-1.87575
YGL080W	MPC1	TFIID	24.9971	1190	0.0626613	0.200313	-2.17031	-2.36351	-2.40009
YHL001W	RPL14B	TFIID	24.976	1191	-0.476265	-0.0352392	-2.29533	-1.86326	-2.08865
YLL010C	PSR1	TFIID	24.9683	1192	-0.348015	0.0880377	-2.05627	-1.96409	-1.921
YER048C	CAJ1	TFIID	24.9513	1193	-0.215884	0.117296	-2.75495	-2.78387	-2.73686
YDR257C	RKM4	TFIID	24.946	1194	0.205254	0.166334	-2.55286	-2.06922	-2.06378
YGR078C	PAC10	TFIID	24.9414	1195	-0.334511	0.00167033	-2.45545	-1.70807	-1.80977
YHR108W	GGA2	TFIID	24.9267	1196	-0.206743	0.0141377	-2.1933	-2.4465	-2.35861
YCR077C	PAT1	TFIID	24.9134	1197	-0.171099	0.0733046	-2.13619	-2.0003	-1.89961
YEL063C	CAN1	TFIID	24.9115	1198	-0.0435651	0.323289	-0.929072	-1.91073	-1.6406
YML004C	GLO1	TFIID	24.9036	1199	0.0779593	-0.00100016	-1.90906	-3.11487	-2.85328
YPR163C	TIF3	TFIID	24.8803	1200	0.0301605	0.185008	-2.28728	-1.89005	-1.85863
YGR134W	CAF130	TFIID	24.8803	1201	-0.25556	-0.219314	-1.15912	-2.56823	-2.36015
YJR060W	CBF1	TFIID	24.8686	1202	-0.338371	0.0620496	-2.55878	-2.60454	-2.3107
YBL039C	URA7	TFIID	24.8674	1203	-0.247668	0.107886	-2.88557	-1.96886	-2.20578
YBR181C	RPS6B	TFIID	24.8364	1204	-0.295882	0.00264589	-2.96959	-2.18214	-2.18168
YNL155W	CUZ1	TFIID	24.8326	1205	-0.130267	-0.355158	-1.93426	-3.47761	-3.36478
YHL003C	LAG1	TFIID	24.8282	1206	-0.21546	-0.031254	-2.63938	-2.40049	-2.56308
YIL021W	RPB3	TFIID	24.7938	1207	-0.210468	0.177288	-2.24002	-1.91077	-1.71703
YFR039C	OSW7	TFIID	24.792	1208	-0.311229	-0.250501	-2.4596	-2.4173	-2.26678
YKL088W	CAB3	TFIID	24.7759	1209	-0.0136461	0.0890567	-2.0174	-2.01889	-1.90459
YDL058W	USO1	TFIID	24.771	1210	0.0246204	0.246097	-2.21013	-2.41184	-2.2546
YJL154C	VPS35	TFIID	24.7289	1211	-0.182248	-0.0646445	-2.08726	-2.50977	-2.48113
YGR186W	TFG1	TFIID	24.719	1212	-0.160879	0.125878	-2.00067	-2.00586	-1.81791
YJL041W	NSP1	TFIID	24.6915	1213	-0.196828	0.18399	-2.38925	-2.27703	-2.03087
YKR082W	NUP133	TFIID	24.6877	1214	-0.130322	-0.0411618	-2.06404	-1.83523	-1.87847
YDR176W	NGG1	TFIID	24.6588	1215	-0.0773614	0.114644	-2.34366	-2.68063	-2.32264
YCR008W	SAT4	TFIID	24.6477	1216	-0.350259	0.122596	-2.23082	-3.2625	-3.39191
YOR327C	SNC2	TFIID	24.5969	1217	-0.830994	-0.806944	-3.07645	-3.51733	-4.1584
YCR106W	RDS1	TFIID	24.5866	1218	-0.351879	-0.177366	-2.11703	-2.57572	-2.74168
YMR054W	STV1	TFIID	24.5788	1219	-0.239021	0.00726688	-2.66191	-2.448	-2.27236
YOR342C	YOR342C	TFIID	24.5739	1220	-0.909071	-0.291766	-2.87818	-2.20845	-3.08832
YLR190W	MMR1	TFIID	24.5635	1221	-0.552811	-0.102269	-2.84807	-2.27452	-2.60796
YHR065C	RRP3	TFIID	24.5455	1222	-0.1094	0.126908	-2.40362	-1.88193	-1.86652
YAR002W	NUP60	TFIID	24.518	1223	-0.105196	0.0286068	-2.11624	-2.27255	-2.19681
YLR008C	PAM18	TFIID	24.5032	1224	0.0310976	0.179504	-2.41937	-1.54724	-1.87365
YJL171C	YJL171C	CR	24.4816	1225	-0.320598	-0.298115	-0.837546	-1.48042	-1.68317
YDR351W	SBE2	TFIID	24.4762	1226	0.061159	-0.0119698	-1.39115	-1.29793	-1.32403
YPL228W	CET1	TFIID	24.4728	1227	-0.0395044	0.167827	-2.13152	-2.20268	-1.99328
YGR145W	ENP2	TFIID	24.4575	1228	-0.109537	0.367836	-3.03022	-1.9243	-1.86036
YMR062C	ARG7	TFIID	24.4554	1229	0.541591	0.674315	-1.17609	-1.88513	-1.19954
YDR003W	RCR2	TFIID	24.4356	1230	-0.635657	-0.272908	-1.56332	-3.16353	-3.26642
YDR519W	FPR2	TFIID	24.3958	1231	-0.184839	-0.0425829	-3.14889	-3.41817	-2.88981
YHR099W	TRA1	TFIID	24.3901	1232	-0.147319	0.137407	-1.99051	-1.97157	-1.86368
YKL065C	YET1	TFIID	24.3896	1233	-0.0995367	-0.110764	-2.14948	-2.20126	-2.07064
YKL094W	YJU3	TFIID	24.3763	1234	-0.0641611	0.113613	-2.23283	-2.49414	-2.57979
YGR033C	TIM21	TFIID	24.372	1235	-0.100302	0.152854	-2.40515	-2.4682	-2.37019
YMR100W	MUB1	TFIID	24.3469	1236	0.00441075	0.0325794	-1.55607	-2.12748	-1.95869
YHR199C	AIM46	CR	24.3226	1237	-0.911408	-0.380729	-0.702849	-2.30951	-2.37811
YKL020C	SPT23	TFIID	24.2879	1238	-0.0526495	0.157125	-1.61283	-1.65546	-1.46582
YIL022W	TIM44	TFIID	24.2872	1239	-0.0818429	0.251011	-2.06746	-1.99604	-1.86848
YJL143W	TIM17	TFIID	24.2786	1240	-0.137633	0.213367	-2.30921	-1.8814	-1.69971
YLR409C	UTP21	TFIID	24.2693	1241	-0.0563124	0.168991	-2.53782	-1.90635	-1.82303
YJL117W	PHO86	TFIID	24.258	1242	-0.0293855	-0.0638191	-2.49921	-2.17063	-1.98084
YPL094C	SEC62	TFIID	24.2494	1243	-0.279241	-0.0207292	-2.56899	-1.93663	-2.15617
YGL014W	PUF4	TFIID	24.2481	1244	-0.109341	0.122713	-2.14344	-1.96729	-1.78151
YHR111W	UBA4	TFIID	24.2435	1245	-0.244226	-0.15066	-2.7489	-2.2855	-2.28945
YGR040W	KSS1	CR	24.2171	1246	-0.569011	-0.238152	-1.81444	-2.76001	-3.17056
YIL115C	NUP159	TFIID	24.1851	1247	-0.0230562	0.182943	-1.90274	-1.75682	-1.6442
YPL013C	MRPS16	TFIID	24.1689	1248	-0.220506	0.0227382	-2.40247	-1.98485	-1.8999
YJL050W	MTR4	TFIID	24.1545	1249	-0.0806866	0.197616	-2.64739	-1.96382	-1.8272
YLR395C	COX8	TFIID	24.1342	1250	-0.311785	0.131894	-2.32878	-2.47243	-2.13908
YJL145W	SFH5	TFIID	24.1293	1251	-0.208987	-0.478187	-3.25022	-2.6665	-2.8004
YLR056W	ERG3	CR	24.0953	1252	-1.57729	-1.15173	-1.28023	-2.54975	-3.60777
YJR016C	ILV3	CR	24.0933	1253	-0.289419	0.174699	-1.29091	-2.35463	-2.29276
YNL149C	PGA2	TFIID	24.0906	1254	-0.436351	-0.106314	-2.50672	-2.83393	-2.69442
YGR198W	YPP1	TFIID	24.0819	1255	-0.278601	-0.295007	-2.29432	-2.44753	-2.74555
YLR295C	ATP14	TFIID	24.0775	1256	-0.123372	0.187173	-2.06781	-2.09248	-2.00885
YOR207C	RET1	TFIID	24.077	1257	-0.00471284	0.207906	-2.18341	-1.41847	-1.44667
YJL212C	OPT1	CR	24.0738	1258	-0.868235	-0.584628	-1.04461	-3.18163	-3.58472
YPL259C	APM1	TFIID	24.0732	1259	-0.100443	0.0323642	-1.7749	-1.94441	-1.95329
YDR083W	RRP8	TFIID	24.073	1260	0.147751	0.404671	-2.77083	-1.73455	-1.59298
YLR058C	SHM2	TFIID	24.0614	1261	-0.724906	-0.57011	-1.4105	-2.14093	-3.47749
YKL205W	LOS1	TFIID	24.0338	1262	0.120578	0.0807644	-1.67764	-1.60446	-1.53757
YLR398C	SKI2	TFIID	24.0233	1263	0.0116101	0.21915	-1.84832	-1.78343	-1.53289
YPR159W	KRE6	TFIID	24.0082	1264	-0.611178	-0.237422	-2.37427	-2.51349	-3.02115
YLR359W	ADE13	TFIID	24.0069	1265	-0.14342	0.0350566	-2.39582	-2.04954	-1.97316
YLR344W	RPL26A	TFIID	24.0043	1266	-0.204107	0.0977338	-2.70643	-2.1997	-2.30251
YJR046W	TAH11	TFIID	24.0005	1267	-0.181747	0.127276	-3.46805	-2.82061	-2.93308
YCR057C	PWP2	TFIID	23.9983	1268	-0.243615	0.197868	-2.48675	-1.74647	-1.71847
YGL150C	INO80	TFIID	23.9711	1269	-0.106462	0.186607	-2.98364	-3.21438	-3.09354
YBL036C	YBL036C	TFIID	23.9563	1270	0.149351	0.238881	-2.4954	-2.1761	-1.87852
YMR243C	ZRC1	TFIID	23.9517	1271	-0.429817	-0.0336602	-2.64629	-2.53721	-3.09979
YHR103W	SBE22	TFIID	23.9361	1272	-0.244037	-0.00654247	-2.32839	-2.87349	-2.85259
YIL070C	MAM33	TFIID	23.9145	1273	-0.0230794	0.163148	-1.85572	-1.94349	-1.78875
YDR452W	PPN1	TFIID	23.8656	1274	-0.203162	0.0414425	-2.72759	-2.21745	-2.13777
YDL047W	SIT4	TFIID	23.8652	1275	-0.369466	0.0750122	-2.59261	-2.26413	-2.27544
YDL040C	NAT1	TFIID	23.8324	1276	-0.00372183	0.136793	-2.55348	-2.34949	-2.22627
YMR089C	YTA12	TFIID	23.8125	1277	-0.0762068	0.201975	-2.35576	-2.65825	-2.37175
YDR055W	PST1	CR	23.8097	1278	-1.60693	-0.945275	-0.0603343	-1.84717	-1.3897
YOL006C	TOP1	TFIID	23.7954	1279	-0.153962	-0.0502095	-2.78042	-3.14148	-3.42785
YGR193C	PDX1	TFIID	23.7926	1280	-0.165521	0.000842861	-2.2775	-2.30947	-2.31422
YBR059C	AKL1	TFIID	23.7834	1281	-0.28557	-0.0753572	-2.21303	-2.60151	-2.43477
YNR043W	MVD1	TFIID	23.7533	1282	-0.191017	0.17871	-1.64154	-2.15467	-2.20493
YJR010W	MET3	TFIID	23.7467	1283	-0.525085	-0.325997	0.0133858	-3.09216	-2.91109
YPL028W	ERG10	TFIID	23.7354	1284	-0.118237	0.0700713	-2.13607	-2.33356	-2.47788
YJR041C	URB2	TFIID	23.7268	1285	0.00249802	0.160191	-2.02884	-1.72527	-1.62911
YDR385W	EFT2	TFIID	23.7106	1286	-0.501706	-0.16663	-2.25289	-2.21734	-2.60563
YOR304W	ISW2	TFIID	23.691	1287	0.0175691	0.200765	-3.2279	-2.45335	-2.35501
YDR045C	RPC11	TFIID	23.6694	1288	0.0814409	0.329063	-2.78608	-1.27776	-1.65927
YOR216C	RUD3	TFIID	23.6671	1289	-0.0233004	0.0653684	-2.24893	-2.01461	-1.97119
YDR472W	TRS31	TFIID	23.647	1290	-0.209201	-0.333918	-2.27699	-3.22183	-3.37568
YJL004C	SYS1	TFIID	23.6404	1291	0.0981353	0.322855	-2.17659	-2.07048	-1.86246
YDR463W	STP1	TFIID	23.6067	1292	0.167951	0.212833	-1.73254	-1.461	-1.41052
YDL111C	RRP42	TFIID	23.6051	1293	-0.220332	0.130805	-2.47343	-2.21977	-2.21571
YKL068W	NUP100	TFIID	23.6011	1294	-0.132341	0.114578	-2.19975	-2.2977	-2.18456
YGR178C	PBP1	TFIID	23.5912	1295	-0.217694	-0.0116622	-2.43322	-2.42806	-2.2579
YPL137C	GIP3	TFIID	23.5728	1296	-0.677591	-0.295393	-1.71066	-2.91756	-3.39024
YOR222W	ODC2	CR	23.5686	1297	0.0234888	0.0974234	-1.71023	-1.95889	-2.44511
YGR060W	ERG25	CR	23.5576	1298	-0.829839	-1.0964	-1.62493	-2.96241	-3.68163
YOR107W	RGS2	CR	23.5544	1299	-0.991532	-0.979879	-0.0975288	-2.84821	-2.36347
YAR014C	BUD14	TFIID	23.5369	1300	-0.178044	0.126978	-2.35106	-2.06514	-2.02214
YDR320C-A	DAD4	TFIID	23.5299	1301	-0.25803	-0.116917	-2.92451	-2.46468	-2.56631
YFR037C	RSC8	TFIID	23.4823	1302	-0.109247	0.202255	-2.48712	-2.31991	-2.06877
YBR088C	POL30	CR	23.4586	1303	-1.01537	-0.91878	-1.10764	-2.87388	-3.44617
YHR206W	SKN7	TFIID	23.4066	1304	-0.156835	0.243906	-2.27473	-2.24862	-2.0405
YDR068W	DOS2	TFIID	23.3966	1305	0.0985901	0.261126	-2.46789	-2.07338	-1.91245
YCL059C	KRR1	TFIID	23.3417	1306	0.00391976	0.164662	-2.96421	-2.05976	-1.968
YOR305W	RRG7	TFIID	23.3353	1307	0.0618665	0.165111	-1.98312	-1.76977	-1.64888
YJL128C	PBS2	TFIID	23.3186	1308	-0.0940831	0.0833233	-2.36268	-2.5969	-2.36131
YHR148W	IMP3	TFIID	23.3115	1309	0.220397	0.332778	-2.14939	-1.44341	-1.35317
YAL007C	ERP2	TFIID	23.3064	1310	-0.0875403	0.00792727	-2.25111	-2.14671	-2.17174
YGL184C	STR3	CR	23.2984	1311	-1.3999	-1.16191	0.327639	-2.96212	-2.34009
YHR104W	GRE3	CR	23.2924	1312	-0.723537	-0.212532	-1.85417	-3.36641	-3.28611
YLR418C	CDC73	TFIID	23.2668	1313	-0.018296	-0.0164123	-2.29665	-2.19043	-2.17549
YNL258C	DSL1	TFIID	23.2548	1314	0.0411796	0.175506	-2.29147	-2.17347	-2.01344
YPR089W	YPR089W	TFIID	23.25	1315	-0.163999	0.151074	-2.09478	-2.14528	-2.06012
YLL013C	PUF3	TFIID	23.2482	1316	-0.0799349	0.15558	-2.10352	-2.54955	-2.23224
YOL051W	GAL11	TFIID	23.2235	1317	-0.145696	0.118233	-2.18122	-2.19334	-2.18202
YMR047C	NUP116	TFIID	23.215	1318	-0.112101	0.120893	-1.87931	-2.09902	-1.86451
YDR298C	ATP5	TFIID	23.2114	1319	-0.240186	-0.0469513	-2.00878	-2.06293	-1.81251
YOL098C	YOL098C	TFIID	23.1979	1320	-0.036654	0.174781	-2.43623	-2.6649	-2.49042
YAL041W	CDC24	TFIID	23.1771	1321	-0.0979515	0.0792814	-2.04435	-2.02154	-1.8992
YOR243C	PUS7	TFIID	23.1682	1322	0.138673	0.338974	-2.56775	-1.83126	-1.56469
YGR195W	SKI6	TFIID	23.1603	1323	-0.203069	0.136669	-2.7019	-1.81053	-1.63697
YHL007C	STE20	TFIID	23.1491	1324	-0.516401	-0.111177	-2.33367	-2.10682	-2.44919
YLR248W	RCK2	TFIID	23.1424	1325	-0.197061	0.0437286	-2.59833	-2.34125	-2.52677
YKL101W	HSL1	CR	23.141	1326	-0.78401	-0.421425	-1.61468	-3.09253	-3.29561
YOL126C	MDH2	CR	23.129	1327	-0.449211	-0.510989	-0.947879	-3.37259	-3.67135
YBR256C	RIB5	CR	23.1064	1328	-0.0355142	-0.0958436	-1.39325	-1.96067	-2.04824
YGR280C	PXR1	TFIID	23.0846	1329	-0.109754	0.3594	-2.90267	-1.8906	-2.04133
YFL008W	SMC1	TFIID	23.0686	1330	-0.241737	0.0775996	-2.2059	-2.6536	-2.51236
YBL026W	LSM2	TFIID	23.0482	1331	-0.0478842	-0.184447	-2.53967	-2.11174	-2.16296
YPL271W	ATP15	TFIID	23.0469	1332	-0.110612	-0.0852698	-2.68471	-2.52654	-2.29013
YLR314C	CDC3	TFIID	23.0348	1333	-0.0410909	0.0376358	-2.21714	-2.49627	-2.44377
YOL119C	MCH4	CR	23.0335	1334	-0.252685	-0.041899	-0.641986	-1.92624	-2.0209
YMR319C	FET4	CR	23.0313	1335	-1.45903	-1.10646	-2.52308	-1.95383	-2.57179
YLR224W	YLR224W	TFIID	23.0293	1336	-0.230041	0.2001	-2.38939	-2.01491	-2.02968
YNL138W	SRV2	TFIID	23.0273	1337	-0.260925	0.0281473	-2.02266	-2.2391	-2.01416
YLR410W	VIP1	TFIID	23.0235	1338	-0.0371889	0.234541	-1.75014	-2.12627	-2.05734
YDR227W	SIR4	TFIID	23.0229	1339	-0.205162	-0.0653287	-2.39097	-2.55542	-2.24762
YGL101W	YGL101W	TFIID	23.0207	1340	0.101811	0.149384	-1.90356	-2.79467	-2.47772
YBR249C	ARO4	CR	22.9763	1341	0.196978	0.509574	-1.6716	-1.14097	-1.47051
YNR067C	DSE4	CR	22.967	1342	-1.45636	-1.25539	-0.758777	-3.22948	-2.1878
YNL001W	DOM34	TFIID	22.9641	1343	-0.0991162	-0.0100044	-2.50669	-2.45001	-2.27913
YDR006C	SOK1	TFIID	22.9419	1344	-0.320348	-0.142977	-2.0589	-1.96833	-2.01717
YBR287W	YBR287W	TFIID	22.9352	1345	-0.305031	-0.333951	-1.64073	-2.6939	-2.94717
YNL004W	HRB1	TFIID	22.9351	1346	-0.0929342	0.130248	-2.30302	-2.26584	-2.12832
YKL190W	CNB1	TFIID	22.9245	1347	-0.157473	-0.0174193	-2.3377	-2.276	-2.06607
YOR162C	YRR1	TFIID	22.9234	1348	-0.381982	-0.418743	-2.03546	-2.48885	-2.79751
YOR212W	STE4	TFIID	22.9206	1349	-0.622781	-0.0511092	-2.65777	-2.08341	-2.7489
YGR191W	HIP1	TFIID	22.9038	1350	-0.257831	-0.0259963	-2.75212	-2.53266	-2.68945
YER008C	SEC3	TFIID	22.9017	1351	-0.191886	0.132842	-2.46365	-2.69557	-2.44272
YKL058W	TOA2	TFIID	22.8947	1352	-0.378669	0.257998	-2.52453	-2.31237	-2.13317
YGL246C	RAI1	TFIID	22.8765	1353	0.0328189	0.0140519	-2.51925	-1.91366	-1.93954
YNL132W	KRE33	TFIID	22.8736	1354	-0.0988386	0.216877	-2.63761	-1.7771	-1.82996
YOR244W	ESA1	TFIID	22.8681	1355	0.06844	0.104972	-1.65783	-1.33722	-1.14169
YDR507C	GIN4	TFIID	22.8585	1356	-0.640758	-0.234403	-2.50442	-2.55984	-3.34219
YKL061W	BLI1	TFIID	22.8503	1357	0.155442	0.336337	-4.13155	-2.27472	-2.17183
YJR003C	YJR003C	CR	22.8499	1358	0.125916	0.248555	-1.69559	-1.53638	-1.28202
YNL263C	YIF1	TFIID	22.8478	1359	-0.326997	0.0707391	-2.21607	-2.24623	-2.05181
YNL192W	CHS1	CR	22.8327	1360	-0.590713	-0.337587	-0.965367	-2.75073	-2.72756
YJL036W	SNX4	TFIID	22.8258	1361	0.0437618	0.13433	-2.07298	-2.68768	-2.27861
YOL012C	HTZ1	TFIID	22.779	1362	-0.464424	-0.0941075	-2.59271	-2.66887	-2.40445
YNL297C	MON2	TFIID	22.7685	1363	-0.0487161	0.11463	-1.97449	-1.95453	-1.6817
YDL063C	SYO1	TFIID	22.7677	1364	0.248916	0.458445	-2.01972	-1.26905	-1.18955
YBR036C	CSG2	TFIID	22.7577	1365	-0.175469	0.122548	-2.31184	-2.10913	-2.1042
YMR044W	IOC4	TFIID	22.7419	1366	-0.138887	0.188768	-2.80543	-2.80357	-2.51642
YDR500C	RPL37B	TFIID	22.7393	1367	-0.281527	-0.0745994	-2.16802	-1.73822	-1.71476
YOR354C	MSC6	TFIID	22.7364	1368	0.000407245	0.217053	-1.70639	-1.63545	-1.50442
YKL004W	AUR1	TFIID	22.7248	1369	-0.263402	0.020866	-2.18363	-2.07778	-1.8443
YPL011C	TAF3	TFIID	22.724	1370	-0.0864407	0.212505	-1.85699	-1.56705	-1.50287
YJL010C	NOP9	TFIID	22.7132	1371	-0.0944709	0.309616	-3.05212	-2.59788	-2.50682
YDL212W	SHR3	TFIID	22.7116	1372	-0.101567	0.14205	-2.33327	-2.14839	-2.04689
YNL135C	FPR1	CR	22.6748	1373	-0.0941729	0.100271	1.39922	-0.598568	0.565039
YNL130C	CPT1	CR	22.6637	1374	-0.544825	-0.322531	-0.51443	-2.39406	-2.45547
YOL021C	DIS3	TFIID	22.6407	1375	-0.282125	0.135692	-2.29845	-2.21803	-2.0701
YGL108C	YGL108C	TFIID	22.6357	1376	-0.150994	0.155477	-2.34483	-2.92544	-2.51427
YDR169C	STB3	TFIID	22.6165	1377	-0.111256	0.015955	-2.21902	-2.49015	-2.31596
YNL313C	EMW1	TFIID	22.5927	1378	-0.100152	0.200849	-2.44561	-2.11084	-1.96563
YCR034W	ELO2	TFIID	22.5764	1379	-0.377223	-0.0928157	-2.36341	-2.25128	-2.42427
YML001W	YPT7	TFIID	22.574	1380	-0.223206	0.257552	-2.22884	-2.20831	-1.89638
YDL171C	GLT1	TFIID	22.5738	1381	0.166348	0.25055	-1.23573	-1.70847	-1.99702
YLR003C	CMS1	TFIID	22.5733	1382	0.113847	0.166909	-2.35205	-1.94648	-2.03928
YER063W	THO1	TFIID	22.5697	1383	0.0483735	0.0335724	-3.78095	-3.12745	-3.18195
YKR063C	LAS1	TFIID	22.5526	1384	-0.102257	0.0606824	-2.27077	-1.97356	-1.89033
YDL072C	YET3	TFIID	22.551	1385	-0.41226	-0.298695	-2.12982	-2.5113	-2.6042
YKL176C	LST4	TFIID	22.5464	1386	-0.0912203	-0.0385617	-1.87673	-1.6813	-1.73889
YIR033W	MGA2	TFIID	22.5312	1387	-0.336464	-0.269473	-2.5145	-3.23579	-3.27104
YKL185W	ASH1	CR	22.5187	1388	-1.56734	-1.03538	-0.0837547	-2.75648	-1.9295
YKL044W	YKL044W	CR	22.5079	1389	-1.69137	-0.843221	-0.286213	-1.26194	0.0520514
YDR005C	MAF1	TFIID	22.5016	1390	-0.229027	0.182732	-1.61681	-2.23609	-2.19079
YNL191W	DUG3	TFIID	22.4607	1391	-0.501812	-0.183269	-1.6031	-2.55724	-2.49609
YNR019W	ARE2	CR	22.4547	1392	-1.02113	-1.00895	-0.946125	-4.37718	-3.77732
YBL064C	PRX1	CR	22.4524	1393	-0.558103	-0.554128	-0.0267186	-2.2464	-1.86564
YNL041C	COG6	TFIID	22.4408	1394	0.0112697	0.196623	-1.91881	-2.09412	-1.7854
YKL143W	LTV1	TFIID	22.4338	1395	0.180485	0.320167	-2.64999	-1.55197	-1.495
YLR071C	RGR1	TFIID	22.4292	1396	-0.0105363	0.0988844	-1.83153	-1.78971	-1.71996
YLR026C	SED5	TFIID	22.4168	1397	-0.0879419	0.113985	-1.95282	-1.96233	-1.70364
YNL272C	SEC2	TFIID	22.4085	1398	-0.0930858	0.108252	-1.80014	-1.85728	-1.74354
YOR227W	HER1	CR	22.4062	1399	-0.330667	0.153264	-0.705598	-1.824	-1.48752
YOR285W	RDL1	TFIID	22.398	1400	-0.102169	-0.057627	-1.59392	-2.93095	-3.00698
YKL087C	CYT2	TFIID	22.3912	1401	-0.142557	0.314335	-1.41229	-1.99362	-1.75188
YBR122C	MRPL36	TFIID	22.3818	1402	0.0966958	0.173464	-2.27788	-1.88925	-1.85747
YJR042W	NUP85	TFIID	22.378	1403	-0.0204839	0.269571	-1.61741	-1.56337	-1.39282
YCR003W	MRPL32	TFIID	22.3554	1404	0.138358	0.154748	-2.37446	-1.62688	-1.68894
YLR028C	ADE16	TFIID	22.355	1405	-0.193485	-0.0594799	-2.52805	-2.54522	-2.69546
YJL104W	PAM16	TFIID	22.3535	1406	-0.108216	0.119696	-2.64693	-1.96233	-1.78871
YDL226C	GCS1	TFIID	22.3482	1407	-0.290348	0.148025	-2.26994	-2.04157	-1.95563
YOR372C	NDD1	TFIID	22.3418	1408	-0.0543575	-0.0737106	-1.59969	-2.36749	-2.16485
YOL020W	TAT2	TFIID	22.3174	1409	-0.554596	-0.224074	-2.90947	-2.60038	-2.93775
YDR210W	YDR210W	CR	22.3159	1410	-0.142705	-0.133734	-2.05525	-3.09244	-2.76383
YGR183C	QCR9	TFIID	22.3117	1411	-0.0942676	-0.00459924	-2.04053	-1.81144	-2.00193
YDR262W	YDR262W	TFIID	22.3075	1412	0.025276	0.0580192	-1.74275	-1.5721	-1.59306
YML086C	ALO1	TFIID	22.3058	1413	-0.525119	-0.258333	-2.58745	-2.29237	-2.45126
YIL041W	GVP36	TFIID	22.2919	1414	-0.135231	0.218826	-1.97936	-1.81797	-1.65728
YGR245C	SDA1	TFIID	22.2879	1415	-0.0470703	0.31878	-2.66513	-1.80136	-1.79886
YNR038W	DBP6	TFIID	22.2813	1416	-0.0271285	0.296886	-2.26048	-1.90151	-1.73982
YER022W	SRB4	TFIID	22.276	1417	-0.070257	0.175304	-2.17422	-2.54191	-2.12854
YDL035C	GPR1	TFIID	22.2753	1418	0.0030107	0.104908	-2.41741	-2.59868	-2.59014
YJR125C	ENT3	TFIID	22.2407	1419	-0.0559359	0.214142	-1.89571	-1.98374	-1.7211
YCL030C	HIS4	CR	22.2324	1420	0.260836	0.26676	-0.538939	-1.57565	-1.36882
YLL021W	SPA2	TFIID	22.2142	1421	-0.356031	0.0380525	-2.31684	-2.48267	-2.30794
YOR159C	SME1	TFIID	22.2125	1422	-0.0134987	0.191363	-2.46923	-2.59203	-2.30325
YPL059W	GRX5	TFIID	22.1977	1423	-0.153052	0.0176745	-2.40049	-1.94424	-1.98959
YLR052W	IES3	TFIID	22.1922	1424	0.018183	0.198731	-1.78821	-1.89622	-1.9253
YGL106W	MLC1	TFIID	22.151	1425	-0.361388	0.146158	-2.59347	-2.05067	-2.10203
YDR527W	RBA50	TFIID	22.1405	1426	-0.233659	0.0934685	-3.07068	-2.44656	-2.8403
YIL112W	HOS4	TFIID	22.1383	1427	-0.157354	0.166832	-2.15924	-2.43263	-2.02495
YOR375C	GDH1	CR	22.1306	1428	0.176182	0.217961	-0.381148	-1.94294	-1.8722
YOR165W	SEY1	TFIID	22.1226	1429	-0.204918	0.00673165	-2.53587	-2.38413	-2.30073
YFL013C	IES1	TFIID	22.1206	1430	0.0768334	0.232618	-1.98221	-2.12769	-1.88737
YKL033W-A	YKL033W-A	TFIID	22.1081	1431	-0.0665054	0.184438	-2.8568	-2.11265	-1.96457
YNL221C	POP1	TFIID	22.1079	1432	0.0131997	0.0894106	-2.19691	-2.02692	-1.79463
YEL003W	GIM4	TFIID	22.0975	1433	0.156231	0.255275	-2.12148	-2.12831	-1.97004
YOR142W	LSC1	CR	22.064	1434	-0.339335	0.0499096	-1.28397	-2.38531	-2.15639
YBR126C	TPS1	CR	22.0494	1435	-0.464775	-0.10113	-0.740548	-2.40439	-2.59424
YNR031C	SSK2	TFIID	22.0486	1436	-0.231712	-0.0139188	-1.8276	-2.34827	-2.06745
YMR001C-A	YMR001C-A	CR	22.0483	1437	-0.201967	-0.260151	-1.07145	-2.00769	-2.81048
YMR291W	TDA1	CR	22.0395	1438	-0.757026	-0.847704	-0.646561	-3.43445	-3.66105
YMR093W	UTP15	TFIID	22.0231	1439	0.0299772	0.322614	-2.22795	-1.5672	-1.54756
YJL192C	SOP4	TFIID	22.0213	1440	-0.124343	-0.0828387	-2.32552	-2.00727	-1.96211
YMR212C	EFR3	TFIID	22	1441	0.0366434	0.281585	-2.37762	-2.13325	-2.04535
YPR097W	YPR097W	TFIID	21.9982	1442	-0.078172	0.0611211	-2.21384	-2.42237	-2.23382
YNL268W	LYP1	TFIID	21.9956	1443	-0.375203	-0.218473	-1.53543	-2.34418	-2.59913
YLR336C	SGD1	TFIID	21.9513	1444	0.154573	0.381431	-1.95636	-2.07753	-1.9548
YGL233W	SEC15	TFIID	21.9438	1445	-0.0337714	0.209414	-2.24682	-2.58736	-2.23997
YGR207C	CIR1	TFIID	21.9331	1446	-0.103587	0.068508	-2.75495	-2.24977	-2.29558
YNL010W	YNL010W	TFIID	21.9239	1447	-0.0903728	-0.00179816	-2.87123	-2.54276	-2.58751
YGR184C	UBR1	TFIID	21.9085	1448	-0.182185	0.0607641	-2.18758	-2.46083	-2.25786
YPL195W	APL5	TFIID	21.8823	1449	-0.108948	0.198678	-2.16052	-2.12091	-1.9544
YDR378C	LSM6	TFIID	21.8805	1450	0.130751	0.340664	-2.15557	-1.72951	-1.49634
YBR253W	SRB6	TFIID	21.8799	1451	0.0146152	0.262418	-1.99229	-1.50183	-1.41089
YIL056W	VHR1	CR	21.8719	1452	-0.665736	-0.532667	-0.0484782	-2.1003	-1.84045
YOR085W	OST3	TFIID	21.8286	1453	-0.310287	0.0925925	-2.01217	-2.07965	-1.95131
YHR026W	VMA16	TFIID	21.7996	1454	-0.272781	0.190825	-2.41712	-1.63344	-1.58508
YDL112W	TRM3	TFIID	21.7979	1455	0.00977709	0.257332	-2.14464	-1.89826	-1.65894
YLR357W	RSC2	TFIID	21.7932	1456	-0.244986	0.047459	-1.96071	-2.06067	-1.8826
YDL198C	GGC1	CR	21.7606	1457	-0.156965	-0.244629	-1.50082	-2.80678	-2.77506
YPR105C	COG4	TFIID	21.7566	1458	-0.276017	-0.0489703	-2.45138	-3.00275	-2.93013
YBR054W	YRO2	CR	21.7556	1459	-1.76661	-2.20732	-1.38751	-5.10575	-5.80464
YOR311C	DGK1	TFIID	21.7542	1460	0.209921	0.162831	-1.43898	-1.76605	-1.82423
YHR006W	STP2	TFIID	21.7417	1461	-0.0690821	0.0181175	-1.95907	-1.86286	-1.89897
YKR100C	SKG1	TFIID	21.7055	1462	0.0655174	0.218886	-1.96108	-1.87643	-1.76457
YGL013C	PDR1	TFIID	21.6934	1463	-0.323013	-0.114784	-2.40686	-2.72292	-2.64874
YPL053C	KTR6	TFIID	21.6858	1464	-0.125905	0.0498232	-2.16453	-2.20048	-2.25659
YJR134C	SGM1	TFIID	21.6776	1465	-0.0732576	0.103323	-2.27554	-2.34327	-2.00225
YOR241W	MET7	TFIID	21.6756	1466	-0.0980603	0.185283	-1.95361	-1.86158	-1.78396
YLL034C	RIX7	TFIID	21.6683	1467	-0.045046	0.31527	-2.49267	-1.82801	-1.62814
YGL038C	OCH1	CR	21.6623	1468	-0.192665	-0.0819016	-1.68562	-1.99177	-2.2851
YKL204W	EAP1	TFIID	21.659	1469	-0.195817	0.0622483	-1.9443	-1.95288	-1.73878
YDR146C	SWI5	TFIID	21.6338	1470	-0.372071	-0.140852	-2.3284	-2.61093	-2.92099
YKR031C	SPO14	TFIID	21.6325	1471	-0.08773	0.0430376	-2.21266	-2.50065	-2.23107
YPR125W	YLH47	TFIID	21.6284	1472	-0.198938	0.0541418	-2.30425	-2.57012	-2.51689
YKR061W	KTR2	CR	21.6061	1473	-0.923094	-0.922308	-0.50238	-1.18137	-1.3403
YMR255W	GFD1	TFIID	21.5995	1474	-0.286591	0.187938	-2.63498	-2.37331	-2.03987
YNL236W	SIN4	TFIID	21.5904	1475	0.0213934	0.212091	-1.83215	-1.95326	-1.75199
YOR191W	ULS1	TFIID	21.5899	1476	-0.0891115	0.0854969	-2.31701	-2.78665	-2.52963
YIL030C	SSM4	TFIID	21.5853	1477	-0.179846	0.0566929	-1.88338	-2.07288	-2.05956
YBR179C	FZO1	TFIID	21.5827	1478	-0.21653	0.0599758	-2.21333	-2.31562	-2.15172
YDR034C	LYS14	TFIID	21.5816	1479	0.188144	0.22842	-2.6702	-2.33447	-2.07483
YDR219C	MFB1	TFIID	21.56	1480	-0.294277	-0.0993737	-1.68555	-2.43182	-2.08015
YOR103C	OST2	TFIID	21.5469	1481	0.0247809	0.146575	-2.83388	-2.07478	-2.2582
YNL006W	LST8	TFIID	21.5437	1482	-0.137319	0.356154	-2.03155	-1.91379	-2.05809
YDR333C	RQC1	TFIID	21.5286	1483	0.15163	0.26618	-1.4971	-1.83558	-1.54291
YDR027C	VPS54	TFIID	21.5227	1484	0.00714553	0.162972	-1.86959	-2.17114	-2.0005
YKR093W	PTR2	CR	21.4962	1485	-0.237566	0.0600627	1.44262	-1.3407	-1.42583
YHR020W	YHR020W	TFIID	21.4868	1486	-0.0653193	0.390363	-2.57884	-1.80551	-1.80734
YJL098W	SAP185	TFIID	21.4755	1487	-0.0851408	0.246555	-2.46901	-2.2651	-2.22105
YNL239W	LAP3	CR	21.4415	1488	-0.354206	-0.462162	-1.20831	-2.04066	-2.30894
YEL061C	CIN8	TFIID	21.4351	1489	-0.203789	-0.0699074	-1.86825	-2.68811	-2.41231
YGL140C	YGL140C	TFIID	21.4086	1490	-0.0549576	0.270288	-1.99864	-2.09139	-1.88449
YPR070W	MED1	TFIID	21.3961	1491	-0.0288188	0.0624198	-2.15353	-1.78489	-2.02761
YBL007C	SLA1	TFIID	21.3821	1492	-0.239062	0.10664	-1.91332	-2.15151	-1.97288
YNR068C	YNR068C	TFIID	21.3758	1493	-0.13709	-0.215636	-2.56373	-3.18553	-3.05898
YBR142W	MAK5	TFIID	21.374	1494	-0.12473	0.233187	-2.98259	-2.0872	-2.10045
YLR113W	HOG1	CR	21.3704	1495	-0.570049	-0.0271052	-2.17947	-1.58228	-1.98922
YER129W	SAK1	TFIID	21.3644	1496	-0.00320545	0.223595	-1.59609	-1.56895	-1.55447
YNL252C	MRPL17	TFIID	21.3518	1497	-0.339037	0.0502893	-3.72327	-2.44808	-2.18653
YER127W	LCP5	TFIID	21.3466	1498	0.237535	0.423452	-2.28384	-1.40418	-1.3644
YDR087C	RRP1	TFIID	21.3228	1499	-0.16881	0.31158	-2.51327	-1.76036	-1.8039
YMR140W	SIP5	TFIID	21.322	1500	0.0444857	0.110275	-1.60508	-2.09879	-1.83316
YDR515W	SLF1	TFIID	21.3109	1501	-0.0430539	-0.00331581	-1.82628	-2.84465	-2.69161
YGR158C	MTR3	TFIID	21.3011	1502	-0.067942	0.17363	-2.88902	-1.64557	-1.71259
YOR376W-A	YOR376W-A	TFIID	21.2906	1503	-0.281202	-0.258107	-1.74259	-2.50088	-2.38502
YMR256C	COX7	TFIID	21.2889	1504	0.192552	-0.0307659	-2.16659	-1.9896	-1.69231
YER092W	IES5	TFIID	21.2854	1505	-0.245836	-0.00195662	-2.32046	-1.8474	-1.87514
YHR201C	PPX1	TFIID	21.2716	1506	-0.0409119	0.101582	-2.03164	-2.21011	-2.07092
YJL176C	SWI3	TFIID	21.2625	1507	-0.0233086	0.101565	-2.01762	-2.24048	-1.90008
YFL036W	RPO41	TFIID	21.2582	1508	-0.0218462	0.115921	-2.22298	-1.9927	-2.11035
YDR468C	TLG1	TFIID	21.2525	1509	0.0917215	0.244923	-2.43043	-3.01735	-2.67662
YDL003W	MCD1	CR	21.2506	1510	-1.28224	-0.993067	-0.836821	-2.74315	-3.1782
YLR019W	PSR2	TFIID	21.2465	1511	-0.14824	0.137965	-1.9039	-1.97834	-1.95663
YDR407C	TRS120	TFIID	21.2276	1512	-0.120605	0.0747607	-1.75287	-2.02444	-1.84064
YFL048C	EMP47	TFIID	21.2232	1513	-0.0155453	0.217199	-2.23638	-2.07905	-1.85192
YLR181C	VTA1	TFIID	21.2198	1514	-0.196694	0.0988284	-2.10677	-2.11225	-1.92382
YOR157C	PUP1	TFIID	21.2172	1515	-0.190602	-0.0264386	-2.11314	-2.39265	-2.20011
YGR200C	ELP2	TFIID	21.2068	1516	-0.0699667	0.23701	-2.89083	-2.45837	-2.36034
YOR021C	SFM1	TFIID	21.1998	1517	-0.0118112	0.251973	-2.45911	-1.79774	-1.85548
YDR328C	SKP1	TFIID	21.1934	1518	-0.165859	0.191486	-2.46642	-2.26463	-1.89867
YMR153W	NUP53	TFIID	21.1721	1519	-0.0974089	0.0614445	-2.12263	-1.82372	-1.62227
YER082C	UTP7	TFIID	21.1672	1520	-0.0962486	0.288776	-3.21272	-2.01157	-1.98721
YJL196C	ELO1	CR	21.1389	1521	-0.73357	-0.601286	-1.51779	-2.24795	-3.32389
YJL183W	MNN11	TFIID	21.133	1522	-0.303291	0.180983	-2.39604	-2.15041	-1.81898
YDR081C	PDC2	TFIID	21.1231	1523	0.0324575	0.167839	-1.82616	-1.79686	-1.66918
YER166W	DNF1	TFIID	21.1217	1524	-0.274007	-0.0444056	-2.39975	-2.64523	-2.54815
YBR140C	IRA1	TFIID	21.117	1525	-0.127395	0.120313	-1.95306	-2.00934	-1.85828
YJR091C	JSN1	TFIID	21.1088	1526	-0.31069	-0.0544766	-1.95924	-2.27443	-2.24734
YLR084C	RAX2	CR	21.0958	1527	-0.350108	-0.193302	-1.56782	-2.49311	-2.65985
YJR092W	BUD4	TFIID	21.0923	1528	-0.326057	-0.0750741	-2.18595	-2.5813	-2.89484
YDR326C	YSP2	TFIID	21.0884	1529	-0.0828783	0.0461709	-2.06904	-2.07878	-1.82172
YBL085W	BOI1	TFIID	21.0817	1530	-0.398596	-0.111979	-2.30683	-3.01187	-2.96917
YHR049W	FSH1	CR	21.074	1531	-1.01761	-0.912678	-1.60154	-3.29096	-3.90105
YNR022C	MRPL50	TFIID	21.0702	1532	-0.316036	0.15665	-2.11809	-1.94243	-1.78246
YLR182W	SWI6	TFIID	21.0654	1533	-0.173643	0.0906689	-2.054	-2.41288	-2.13975
YKR092C	SRP40	TFIID	21.0621	1534	-0.0393361	0.461993	-2.73604	-1.74615	-1.89677
YIL094C	LYS12	TFIID	21.0565	1535	-0.0439179	-0.00427806	-2.18915	-2.35599	-2.74968
YGL151W	NUT1	TFIID	21.0508	1536	0.0507781	0.344627	-1.63157	-1.84409	-1.61202
YGR072W	UPF3	TFIID	21.0404	1537	0.200808	0.320531	-2.17972	-1.87784	-1.63875
YOR283W	YOR283W	TFIID	21.0379	1538	-0.116005	0.10026	-2.72638	-2.49666	-2.53152
YDR150W	NUM1	TFIID	21.0311	1539	-0.258995	-0.11003	-1.97308	-2.29572	-2.08962
YHL002W	HSE1	TFIID	21.0161	1540	-0.0927666	0.128239	-1.71196	-1.91546	-1.74334
YBR149W	ARA1	CR	21.0026	1541	-0.241088	-0.141203	-1.368	-2.97905	-2.83442
YGL090W	LIF1	TFIID	20.9868	1542	-0.0138929	-0.0975231	-2.25527	-2.53618	-2.4003
YNL216W	RAP1	TFIID	20.9723	1543	-0.187558	0.255465	-2.30727	-2.54821	-2.27541
YLR023C	IZH3	TFIID	20.9706	1544	0.159878	0.285543	-1.4109	-1.85613	-1.90922
YBL050W	SEC17	TFIID	20.9692	1545	-0.0269918	0.123972	-2.30285	-1.70627	-1.72785
YKL154W	SRP102	TFIID	20.9635	1546	-0.00522755	0.175976	-2.03763	-1.92008	-1.67623
YDL073W	YDL073W	TFIID	20.9581	1547	0.154674	0.228727	-1.54966	-1.76678	-1.65028
YPL184C	MRN1	TFIID	20.9375	1548	-0.19453	0.125618	-1.82927	-1.48091	-1.58368
YIL091C	UTP25	TFIID	20.9198	1549	0.0594847	0.334263	-2.35582	-1.52988	-1.40454
YKL192C	ACP1	TFIID	20.9181	1550	-0.263062	-0.181277	-2.2952	-2.1825	-2.08087
YJL207C	LAA1	TFIID	20.9111	1551	-0.0451729	0.174446	-2.17176	-2.35609	-2.11813
YLR371W	ROM2	TFIID	20.8986	1552	-0.0923463	0.0459703	-1.92793	-2.32261	-2.14966
YKL213C	DOA1	TFIID	20.8942	1553	-0.209405	-0.0140302	-1.91002	-2.29467	-2.3659
YNL156C	NSG2	TFIID	20.8827	1554	-0.238274	-0.169763	-1.80963	-1.99729	-2.11388
YDR390C	UBA2	TFIID	20.8822	1555	-0.00254706	0.233371	-2.44832	-2.67085	-2.41035
YPR008W	HAA1	TFIID	20.8782	1556	-0.282297	-0.00456365	-2.57067	-2.43164	-3.10052
YNL039W	BDP1	TFIID	20.8691	1557	-0.109352	0.137697	-2.35448	-2.51178	-2.2552
YEL001C	IRC22	TFIID	20.8522	1558	-0.244561	0.0939605	-3.046	-2.35829	-2.31212
YDL085C-A	YDL085C-A	TFIID	20.8503	1559	-0.051652	0.111731	-2.63365	-2.34663	-2.22727
YDR334W	SWR1	TFIID	20.833	1560	-0.173102	-0.05859	-2.2985	-2.63745	-2.69393
YLR133W	CKI1	TFIID	20.823	1561	-0.418118	-0.268728	-2.53005	-2.7409	-2.70111
YMR129W	POM152	TFIID	20.7853	1562	-0.072204	0.213289	-2.22871	-2.00239	-1.87347
YJL069C	UTP18	TFIID	20.7847	1563	0.00983798	0.300225	-2.2202	-1.77414	-1.61491
YOR323C	PRO2	TFIID	20.7822	1564	-0.00275945	0.22658	-2.38331	-2.15961	-1.92445
YLR370C	ARC18	TFIID	20.7761	1565	-0.117434	0.0129415	-1.90767	-2.14113	-1.9402
YMR305C	SCW10	CR	20.7729	1566	-0.738031	-0.360015	-1.10451	-3.23739	-2.644
YML031W	NDC1	TFIID	20.769	1567	-0.291317	0.2098	-1.7937	-1.71507	-1.61594
YJR086W	STE18	TFIID	20.7582	1568	-0.0619115	0.0377546	-2.13763	-1.70035	-1.55119
YCR042C	TAF2	TFIID	20.7395	1569	-0.0730598	0.21963	-2.29958	-1.96125	-1.747
YGL091C	NBP35	TFIID	20.7296	1570	-0.16838	-0.158786	-2.06008	-2.40014	-2.36543
YBR165W	UBS1	TFIID	20.7277	1571	0.000773213	0.120394	-1.85401	-1.7408	-1.51335
YJL082W	IML2	CR	20.7129	1572	-0.553202	-1.17876	-1.15462	-3.49958	-4.50821
YER007C-A	TMA20	TFIID	20.7094	1573	-0.0620585	-0.0201225	-2.81422	-2.44403	-2.23703
YPR100W	MRPL51	TFIID	20.709	1574	-0.0683691	0.125972	-2.47202	-2.39966	-2.07848
YNL219C	ALG9	TFIID	20.7026	1575	-0.159163	5.05e-05	-2.39685	-2.33507	-2.24498
YOR145C	PNO1	TFIID	20.7005	1576	0.181604	0.297383	-3.34926	-2.26053	-2.17363
YOR048C	RAT1	TFIID	20.6861	1577	-0.0748626	0.153659	-2.45644	-1.97687	-1.79809
YKR067W	GPT2	TFIID	20.6841	1578	-0.159218	0.430779	-1.45832	-2.12089	-2.04375
YDR166C	SEC5	TFIID	20.6775	1579	-0.147467	0.149157	-1.84185	-2.22227	-1.82546
YDR337W	MRPS28	TFIID	20.6729	1580	-0.0517344	0.292906	-2.51568	-2.43156	-2.23607
YHR021C	RPS27B	TFIID	20.6727	1581	-0.315711	-0.18673	-2.23296	-2.25828	-2.54133
YNL167C	SKO1	TFIID	20.6451	1582	-0.129307	0.0318947	-1.8791	-2.24081	-2.03111
YEL007W	MIT1	CR	20.6425	1583	-0.237681	-0.0443424	-0.0681696	-2.04862	-1.69976
YAL019W	FUN30	TFIID	20.6407	1584	-0.0609262	0.215192	-2.54931	-2.17218	-2.15434
YOR124C	UBP2	TFIID	20.6321	1585	-0.0218286	0.168671	-2.37361	-2.62288	-2.34548
YER176W	ECM32	TFIID	20.6273	1586	-0.0407802	0.0787975	-2.19626	-2.17139	-2.00682
YMR149W	SWP1	TFIID	20.627	1587	-0.238683	0.239883	-2.14058	-2.20237	-2.17559
YMR064W	AEP1	TFIID	20.626	1588	0.167896	0.248199	-2.12489	-1.95588	-1.7377
YNL232W	CSL4	TFIID	20.6228	1589	-0.137985	0.294323	-3.0494	-2.06882	-1.98172
YOR004W	UTP23	TFIID	20.6193	1590	0.0767938	0.0466274	-2.7847	-1.72576	-1.76972
YOR315W	SFG1	CR	20.5934	1591	-0.458664	-0.195639	-1.41202	-2.4428	-1.81483
YDL167C	NRP1	TFIID	20.5831	1592	0.10877	0.313249	-2.24377	-1.40082	-1.36293
YOR036W	PEP12	TFIID	20.5809	1593	-0.143773	0.0130249	-1.83118	-2.46185	-2.09021
YGL231C	EMC4	TFIID	20.5771	1594	-0.175048	0.294724	-1.73318	-2.26994	-2.03211
YMR004W	MVP1	TFIID	20.5717	1595	-0.242278	-0.242739	-2.21728	-2.58628	-2.41689
YGR082W	TOM20	TFIID	20.5586	1596	-0.468116	0.118163	-2.59179	-2.20138	-2.26711
YGR215W	RSM27	TFIID	20.5396	1597	0.12034	0.233448	-2.2945	-1.76757	-1.68356
YDR177W	UBC1	TFIID	20.5257	1598	0.0339033	0.293618	-1.79172	-1.38972	-1.32319
YKL015W	PUT3	TFIID	20.5221	1599	0.000598461	0.19758	-2.11723	-2.6466	-2.21046
YEL037C	RAD23	TFIID	20.4986	1600	-0.177548	0.295426	-2.82656	-2.73461	-2.5474
YAL036C	RBG1	TFIID	20.498	1601	-0.0204997	0.286283	-2.44179	-1.56307	-1.49519
YLR195C	NMT1	TFIID	20.4924	1602	-0.0167407	0.215267	-2.60256	-2.32375	-2.24265
YER164W	CHD1	TFIID	20.4908	1603	-0.119374	0.309912	-2.52368	-2.47327	-2.04033
YLR093C	NYV1	TFIID	20.4625	1604	0.0607207	0.166654	-2.27636	-1.6516	-1.66657
YLR291C	GCD7	TFIID	20.4608	1605	-0.166137	0.148026	-2.21695	-1.89438	-1.9204
YML111W	BUL2	TFIID	20.449	1606	-0.0147919	-0.119716	-2.17732	-2.42321	-2.65899
YDR162C	NBP2	TFIID	20.4442	1607	0.210991	0.241083	-2.25612	-2.0532	-1.78838
YKL100C	YPF1	TFIID	20.4431	1608	-0.169306	0.108676	-2.26103	-2.2921	-2.47078
YJL060W	BNA3	TFIID	20.4251	1609	-0.257776	-0.0807971	-1.04047	-2.58102	-2.64024
YLR086W	SMC4	TFIID	20.4064	1610	-0.184921	0.0962138	-2.23177	-2.52363	-2.31742
YNL162W	RPL42A	TFIID	20.4057	1611	-0.328148	-0.192133	-2.554	-2.51694	-2.68685
YKR026C	GCN3	TFIID	20.3996	1612	0.100477	0.17369	-2.57184	-2.51242	-2.35856
YAL040C	CLN3	CR	20.3853	1613	-0.379331	-0.0605463	-0.412678	-1.41393	-1.89977
YJL110C	GZF3	TFIID	20.3717	1614	0.0834281	0.235176	-2.26421	-2.06913	-1.97732
YOR307C	SLY41	TFIID	20.3445	1615	0.0288363	0.184911	-2.17337	-1.80181	-1.63726
YBR002C	RER2	TFIID	20.3438	1616	0.0841282	0.2194	-2.56652	-2.11643	-1.95376
YDR423C	CAD1	TFIID	20.341	1617	-0.0190307	-0.0158443	-2.61596	-2.34469	-2.24394
YIL116W	HIS5	CR	20.3297	1618	0.173085	0.265548	-0.917851	-1.69465	-1.74279
YDR505C	PSP1	TFIID	20.329	1619	-0.246897	0.144918	-2.53008	-3.38986	-3.20952
YDR477W	SNF1	TFIID	20.3117	1620	-0.100405	0.117853	-1.82859	-1.94032	-1.73139
YEL043W	YEL043W	TFIID	20.3038	1621	-0.295458	0.0858236	-2.10559	-2.00459	-1.99593
YDL095W	PMT1	TFIID	20.2725	1622	-0.217742	-0.048548	-2.3908	-2.56304	-2.58413
YPL085W	SEC16	TFIID	20.2543	1623	-0.14699	0.154378	-2.19193	-2.10725	-1.93011
YGL107C	RMD9	TFIID	20.2455	1624	0.0293879	0.290896	-1.60376	-1.63252	-1.46178
YLR312W-A	MRPL15	TFIID	20.2378	1625	-0.0387862	0.362792	-2.08043	-1.96279	-1.74762
YNR017W	TIM23	TFIID	20.2011	1626	-0.196328	0.00539422	-3.15406	-2.39712	-2.31268
YML015C	TAF11	TFIID	20.1899	1627	0.0554549	0.199057	-1.79296	-1.7709	-1.4979
YMR237W	BCH1	TFIID	20.1887	1628	-0.147329	0.247699	-2.07478	-1.89205	-1.72765
YDR388W	RVS167	TFIID	20.1883	1629	-0.206399	0.0139482	-2.34294	-2.10916	-2.04569
YGR123C	PPT1	TFIID	20.1816	1630	-0.130731	0.0146533	-3.17387	-2.46377	-2.49247
YNL300W	TOS6	CR	20.1608	1631	-1.94319	-1.60598	-0.502951	-2.53414	-1.79115
YDR331W	GPI8	TFIID	20.1583	1632	-0.166779	0.129937	-2.10189	-2.2891	-2.04598
YKR062W	TFA2	TFIID	20.1577	1633	-0.0360504	0.0619675	-1.79782	-1.95483	-2.01593
YPL084W	BRO1	TFIID	20.1524	1634	0.0907587	0.214988	-2.62218	-2.60139	-2.41956
YPL183C	RTT10	TFIID	20.1467	1635	0.0529612	0.165572	-2.72584	-2.07921	-2.21573
YGL082W	YGL082W	TFIID	20.1421	1636	-0.163099	-0.0840975	-2.0856	-2.51182	-2.43783
YDR389W	SAC7	TFIID	20.1153	1637	-0.232004	0.13492	-2.03584	-2.25851	-2.43639
YNL188W	KAR1	TFIID	20.0917	1638	-0.155208	0.0707465	-2.35974	-2.31219	-2.08019
YBR080C	SEC18	TFIID	20.09	1639	-0.132666	0.0714933	-2.60435	-2.39013	-1.93432
YIR006C	PAN1	TFIID	20.0583	1640	-0.279019	0.060999	-2.32749	-2.37428	-2.08355
YGR274C	TAF1	TFIID	20.0521	1641	-0.105062	0.0754385	-2.03035	-2.32789	-2.02643
YBR187W	GDT1	TFIID	20.04	1642	-0.322445	-0.146642	-2.95859	-2.65197	-3.09078
YPL143W	RPL33A	TFIID	20.0378	1643	-0.204259	-0.172685	-2.3855	-2.13174	-2.34321
YHR030C	SLT2	TFIID	20.0356	1644	-0.101495	0.03117	-1.72263	-2.09718	-2.32945
YMR077C	VPS20	TFIID	20.0205	1645	0.114946	0.209612	-2.08743	-2.38877	-2.21008
YPR189W	SKI3	TFIID	20.0108	1646	-0.133281	0.10597	-2.38277	-2.36097	-2.09467
YMR024W	MRPL3	TFIID	20.0028	1647	-0.0793449	0.282478	-1.58513	-1.70324	-1.50422
YJL044C	GYP6	TFIID	19.9888	1648	-0.0421886	0.238933	-3.05999	-2.2619	-2.20383
YDL240W	LRG1	TFIID	19.9779	1649	-0.148753	0.0606109	-2.08246	-2.47693	-2.34234
YML062C	MFT1	TFIID	19.974	1650	0.115538	0.345788	-1.91521	-1.75749	-1.57688
YLR274W	MCM5	TFIID	19.9717	1651	-0.0952305	0.126591	-2.24726	-1.82616	-1.98797
YER080W	AIM9	TFIID	19.9652	1652	-0.098398	-0.0538281	-2.71752	-2.66832	-2.52916
YOR001W	RRP6	TFIID	19.9649	1653	-0.0823616	0.260942	-2.44393	-1.88028	-1.66107
YKL126W	YPK1	TFIID	19.9472	1654	-0.330253	-0.065124	-1.93491	-2.81856	-2.41708
YMR099C	YMR099C	TFIID	19.9378	1655	-0.0313727	0.319717	-2.47865	-2.18924	-1.99881
YDR116C	MRPL1	TFIID	19.9159	1656	-0.0703925	0.209099	-2.60706	-2.8233	-2.34141
YLR298C	YHC1	TFIID	19.9122	1657	-0.147229	-0.0435101	-2.42257	-2.05237	-1.82192
YBL061C	SKT5	TFIID	19.9024	1658	-0.211313	0.0443839	-1.66159	-2.16023	-2.33044
YKR059W	TIF1	TFIID	19.8932	1659	-0.176701	0.134896	-2.19631	-1.7564	-1.92715
YLR332W	MID2	TFIID	19.8882	1660	-0.479827	-0.329998	-1.85901	-2.26607	-2.59702
YDR398W	UTP5	TFIID	19.8725	1661	-0.111988	0.0889244	-2.48569	-1.87578	-1.83074
YMR128W	ECM16	TFIID	19.8666	1662	-0.00857522	0.306558	-2.55736	-1.96642	-1.7436
YGR250C	YGR250C	CR	19.8414	1663	-0.231411	-0.329371	-1.44953	-4.55999	-4.6893
YOR234C	RPL33B	TFIID	19.8393	1664	-0.183207	-0.0562858	-2.36057	-2.28565	-2.27185
YKR089C	TGL4	TFIID	19.8128	1665	-0.251463	0.00489158	-1.56781	-2.06744	-2.2367
YPR119W	CLB2	CR	19.8114	1666	-0.271374	0.0603222	-1.47781	-2.36683	-2.53859
YPR004C	AIM45	TFIID	19.7966	1667	-0.438853	0.00957584	-2.50235	-2.50748	-2.34352
YIL127C	RRT14	TFIID	19.7805	1668	0.233955	0.0952283	-2.31165	-1.57825	-1.53758
YLR079W	SIC1	CR	19.7586	1669	-0.383132	-0.210443	-1.12423	-2.28886	-2.07816
YIR004W	DJP1	TFIID	19.7442	1670	-0.0291458	0.252565	-2.03857	-1.94371	-1.68691
YOR316C	COT1	TFIID	19.7373	1671	-0.616353	-0.356046	-1.8608	-2.94834	-3.14918
YPR161C	SGV1	TFIID	19.7128	1672	-0.0872234	0.126469	-2.33193	-2.16023	-2.04251
YLL014W	EMC6	TFIID	19.711	1673	0.0880248	0.284811	-2.65963	-2.00663	-1.81449
YNL256W	FOL1	TFIID	19.6858	1674	-0.354766	-0.405314	-2.04498	-2.58647	-2.87252
YNL139C	THO2	TFIID	19.6534	1675	-0.0602329	0.125107	-2.19608	-2.25814	-2.12783
YOR340C	RPA43	TFIID	19.6521	1676	-0.100036	0.358395	-2.36774	-1.74509	-1.68178
YNL306W	MRPS18	TFIID	19.6321	1677	-0.310908	0.188205	-2.38433	-2.27261	-2.15307
YDR313C	PIB1	TFIID	19.6252	1678	-0.308374	-0.0160341	-2.17797	-2.49433	-2.22819
YEL052W	AFG1	TFIID	19.6143	1679	-0.16618	-0.142258	-0.921742	-2.93426	-2.68675
YOR056C	NOB1	TFIID	19.5955	1680	-0.120749	0.19948	-2.4848	-1.97652	-2.03089
YGL194C	HOS2	TFIID	19.5934	1681	0.0903956	0.131087	-1.2983	-1.41535	-1.17022
YOR101W	RAS1	TFIID	19.588	1682	-0.435885	-0.558775	-4.47658	-3.00681	-4.30305
YKR096W	ESL2	TFIID	19.5825	1683	-0.0500219	0.0874655	-2.15879	-2.52464	-2.33077
YKL109W	HAP4	CR	19.5803	1684	-0.717056	0.047697	0.683254	-1.64844	-0.845004
YLR275W	SMD2	TFIID	19.5793	1685	0.328193	0.248711	-2.53583	-1.52656	-1.41711
YGL020C	GET1	TFIID	19.5653	1686	0.0484574	0.157609	-1.89823	-2.227	-1.86642
YML105C	SEC65	TFIID	19.5557	1687	-0.420033	0.168202	-2.56532	-2.22085	-1.96798
YOR030W	DFG16	TFIID	19.5458	1688	-0.0390134	0.0135458	-1.67615	-1.78777	-1.67335
YKL049C	CSE4	TFIID	19.5358	1689	-0.103665	0.0695935	-2.18657	-2.96219	-2.65403
YLR412W	BER1	TFIID	19.5214	1690	-0.0118759	0.140771	-2.17175	-1.63013	-1.54434
YLR301W	HRI1	TFIID	19.4896	1691	-0.35404	0.00895021	-3.04559	-2.78724	-3.1048
YLR305C	STT4	TFIID	19.4807	1692	-0.170653	0.0778194	-2.70112	-2.51114	-2.55999
YOR322C	LDB19	TFIID	19.4779	1693	-0.150464	0.211443	-1.79802	-1.66376	-1.46937
YMR298W	LIP1	TFIID	19.4721	1694	-0.53481	-0.357641	-2.48338	-2.38096	-2.44004
YDR184C	ATC1	TFIID	19.4611	1695	0.208808	0.295446	-2.67435	-2.052	-2.28889
YDL037C	BSC1	CR	19.4488	1696	-1.24034	-1.49038	-1.00052	-2.93135	-3.34099
YNL201C	PSY2	TFIID	19.4467	1697	-0.163204	0.0563002	-2.39128	-2.35747	-2.34381
YHR107C	CDC12	TFIID	19.4463	1698	-0.46613	-0.0561052	-2.35947	-2.37721	-2.27383
YGR251W	NOP19	TFIID	19.4281	1699	0.116736	0.229217	-2.57548	-2.12391	-2.28799
YDR141C	DOP1	TFIID	19.4263	1700	-0.107174	0.166304	-2.25611	-2.1332	-1.85153
YHR009C	TDA3	TFIID	19.4185	1701	-0.0997305	0.0431558	-2.59681	-2.42111	-2.53332
YDL060W	TSR1	TFIID	19.4184	1702	0.032449	0.360682	-2.58932	-1.99869	-1.84051
YNL081C	SWS2	TFIID	19.416	1703	-0.0788794	0.361959	-2.35661	-2.05407	-1.65863
YCL010C	SGF29	TFIID	19.4036	1704	-0.207757	0.147082	-2.68433	-2.2581	-2.20356
YMR272C	SCS7	CR	19.3698	1705	-0.440468	-0.113401	-2.00851	-3.14368	-3.48243
YER178W	PDA1	TFIID	19.3659	1706	-0.236326	0.13057	-2.30557	-1.74691	-1.80537
YLR363C	NMD4	TFIID	19.3606	1707	0.16101	0.0703778	-2.11008	-1.66	-1.34671
YIR018W	YAP5	TFIID	19.3326	1708	-0.252927	-0.0911721	-2.1428	-1.43834	-1.78789
YGL056C	SDS23	TFIID	19.3242	1709	-0.185503	0.13273	-2.21204	-1.90544	-2.14458
YNL075W	IMP4	TFIID	19.3119	1710	0.204581	0.344063	-2.56678	-1.65698	-1.65015
YDR120C	TRM1	TFIID	19.307	1711	0.00400788	0.424323	-2.64315	-1.76414	-1.71497
YGL171W	ROK1	TFIID	19.2998	1712	-0.0666183	0.334368	-2.76961	-2.04104	-1.88723
YDR373W	FRQ1	TFIID	19.2858	1713	0.0100218	0.0115986	-2.56171	-2.22343	-2.02076
YKL211C	TRP3	TFIID	19.277	1714	-0.0711869	0.301807	-2.40112	-1.88681	-1.93865
YDL207W	GLE1	TFIID	19.2759	1715	-0.0735772	0.122365	-1.85418	-1.96656	-1.65603
YLR401C	DUS3	TFIID	19.2657	1716	-0.0959843	0.240781	-3.10263	-1.87639	-1.91774
YLR321C	SFH1	TFIID	19.2652	1717	-0.0415543	0.189103	-2.17194	-2.31523	-1.99243
YLR038C	COX12	TFIID	19.2542	1718	0.309687	0.26715	-1.90902	-1.97618	-1.96214
YNR047W	FPK1	TFIID	19.2514	1719	-0.0618681	0.0841817	-1.82372	-2.08443	-1.92179
YLR185W	RPL37A	TFIID	19.2489	1720	-0.193249	0.0119341	-2.90537	-2.37531	-2.4724
YDR232W	HEM1	TFIID	19.2452	1721	-0.331378	0.111315	-2.26905	-3.15529	-3.21249
YOR075W	UFE1	TFIID	19.2442	1722	-0.140935	0.116593	-1.91742	-2.12538	-1.86291
YMR314W	PRE5	TFIID	19.2439	1723	-0.076131	0.293893	-2.44725	-2.33938	-2.23539
YBL103C	RTG3	TFIID	19.2297	1724	0.0475207	0.2041	-1.69791	-1.62528	-1.46111
YDR464W	SPP41	TFIID	19.229	1725	-0.128904	0.102769	-2.4693	-2.67887	-2.25592
YNL301C	RPL18B	CR	19.225	1726	-0.187521	0.253628	-0.91716	-0.873577	-1.20565
YPR042C	PUF2	TFIID	19.2194	1727	-0.0901322	0.171744	-1.59009	-1.63041	-1.58414
YDR041W	RSM10	TFIID	19.2192	1728	-0.120542	-0.00729339	-2.27813	-2.12978	-2.01401
YBR245C	ISW1	TFIID	19.2161	1729	-0.202944	0.139636	-2.48845	-2.64653	-2.55588
YDR138W	HPR1	TFIID	19.2013	1730	0.187417	0.3473	-1.90338	-1.57382	-1.48385
YJL096W	MRPL49	TFIID	19.1974	1731	0.0370576	0.129568	-2.27668	-2.11425	-2.07258
YIL062C	ARC15	TFIID	19.1926	1732	0.00565444	0.260443	-2.46436	-2.46557	-2.281
YDL135C	RDI1	TFIID	19.178	1733	0.0458849	0.211648	-1.98209	-2.27535	-2.2076
YIL084C	SDS3	TFIID	19.1761	1734	-0.054359	0.125408	-2.19683	-2.56121	-2.25224
YNL161W	CBK1	TFIID	19.1753	1735	-0.0385528	0.340554	-1.79875	-1.6909	-1.64134
YDR458C	HEH2	TFIID	19.1636	1736	0.0643861	0.243831	-2.26434	-2.26129	-2.09673
YML092C	PRE8	TFIID	19.1632	1737	-0.366892	0.0169389	-2.20174	-2.26186	-2.07738
YHR013C	ARD1	TFIID	19.1581	1738	-0.221346	0.0869755	-2.40338	-2.25107	-2.06124
YGL148W	ARO2	TFIID	19.1551	1739	-0.187511	0.0954462	-2.4917	-2.23782	-2.32408
YGL055W	OLE1	CR	19.1514	1740	-1.17984	-1.57365	-2.02113	-3.27825	-3.8198
YDR001C	NTH1	CR	19.15	1741	-0.621599	-0.586409	-0.37031	-2.55186	-2.78099
YOR095C	RKI1	TFIID	19.1465	1742	-0.130588	-0.199969	-3.52837	-1.95514	-2.20703
YGR074W	SMD1	TFIID	19.1426	1743	-0.0985561	-0.00825077	-2.22677	-2.09237	-1.86254
YJL129C	TRK1	TFIID	19.1425	1744	-0.106723	0.105772	-1.81119	-2.01162	-2.05061
YHR090C	YNG2	TFIID	19.141	1745	0.0694047	0.168356	-1.75567	-1.56508	-1.3262
YHR152W	SPO12	TFIID	19.1387	1746	-0.502871	-0.232995	-3.27535	-2.81621	-3.12476
YGL039W	YGL039W	TFIID	19.1217	1747	-0.0679496	-0.304983	-3.28913	-2.83698	-2.76052
YKL099C	UTP11	TFIID	19.1145	1748	0.0210008	0.406373	-2.65835	-1.55001	-1.60569
YOL030W	GAS5	CR	19.1055	1749	-0.192519	0.130283	-1.2245	-2.08216	-2.24114
YIL031W	ULP2	TFIID	19.1005	1750	-0.167072	0.0566119	-1.84806	-2.18277	-2.00508
YBR058C-A	TSC3	TFIID	19.0862	1751	-0.498504	0.295279	-2.4509	-2.0525	-2.20415
YPL189C-A	COA2	TFIID	19.0749	1752	0.963833	1.29494	-0.726072	-1.70298	-2.21207
YPL211W	NIP7	TFIID	19.058	1753	0.348363	0.360121	-2.55131	-1.69796	-1.8005
YLR114C	AVL9	TFIID	19.0543	1754	-0.133596	0.1937	-2.37231	-2.38913	-2.15011
YHR123W	EPT1	TFIID	19.0533	1755	-0.570697	-0.348223	-2.78265	-3.22807	-3.36811
YOR272W	YTM1	TFIID	19.0293	1756	-0.194252	0.284444	-2.58453	-1.37554	-1.36455
YPR025C	CCL1	TFIID	19.0214	1757	-0.0500836	0.287877	-1.75908	-1.83405	-1.50898
YBL033C	RIB1	CR	19.0132	1758	-0.589324	-0.64621	-1.0108	-3.24574	-2.95431
YGR261C	APL6	TFIID	19.0045	1759	-0.118928	0.23	-2.39354	-2.59139	-2.19698
YLR045C	STU2	TFIID	19.0021	1760	-0.395534	-0.0386207	-2.24234	-3.099	-2.95018
YDR161W	YDR161W	TFIID	19.0018	1761	0.0482507	0.362345	-2.93781	-1.83795	-1.71115
YKR056W	TRM2	TFIID	19.0018	1762	0.045949	0.294453	-2.25283	-1.4973	-1.39451
YDR189W	SLY1	TFIID	18.9975	1763	-0.158903	0.125277	-2.39136	-2.43565	-2.27784
YBR151W	APD1	TFIID	18.9847	1764	-0.103232	-0.0743494	-2.13275	-2.52541	-2.42209
YNR074C	AIF1	CR	18.9684	1765	-0.302356	0.00664148	-1.35841	-2.10532	-2.5511
YKL167C	MRP49	TFIID	18.9437	1766	-0.281723	-0.047771	-1.8426	-1.7475	-1.59816
YIL129C	TAO3	TFIID	18.933	1767	-0.0908578	0.122894	-1.74919	-2.06422	-1.70166
YDR454C	GUK1	TFIID	18.9309	1768	-0.254892	0.135257	-2.24961	-2.09849	-2.03577
YDL027C	YDL027C	TFIID	18.9236	1769	-0.0607197	-0.0154489	-1.80937	-2.15624	-1.83208
YBR166C	TYR1	TFIID	18.9198	1770	0.00357419	0.256466	-2.36217	-2.07619	-1.89693
YGL200C	EMP24	TFIID	18.9167	1771	-0.140057	0.066993	-2.5181	-2.12172	-2.11281
YOL158C	ENB1	CR	18.9159	1772	-1.30005	-0.455043	-2.05273	-3.20148	-3.34374
YDR297W	SUR2	TFIID	18.9144	1773	-0.409657	-0.527155	-2.73733	-3.22557	-3.71555
YGL187C	COX4	TFIID	18.8855	1774	-0.145284	0.157771	-1.77207	-2.01696	-1.48743
YDR301W	CFT1	TFIID	18.8775	1775	-0.079096	0.135293	-2.12277	-2.06177	-1.78869
YGR084C	MRP13	TFIID	18.8749	1776	0.0450352	0.246929	-1.7428	-1.72477	-1.47193
YHR197W	RIX1	TFIID	18.8648	1777	0.128429	0.316128	-2.1636	-1.73324	-1.65454
YNR053C	NOG2	TFIID	18.8631	1778	0.0528261	0.19167	-1.60293	-1.78193	-1.97507
YGR008C	STF2	CR	18.8597	1779	-0.397659	-0.92521	-0.948995	-4.61545	-4.55232
YKR030W	GMH1	TFIID	18.8433	1780	0.0574312	0.184316	-2.36836	-2.32931	-1.87456
YLR254C	NDL1	TFIID	18.8394	1781	0.17351	0.117927	-2.58019	-1.81855	-1.41707
YDR017C	KCS1	TFIID	18.8267	1782	-0.098993	0.240746	-2.66719	-2.48524	-2.601
YGL094C	PAN2	TFIID	18.8267	1783	-0.383695	-0.0507299	-2.21146	-2.77787	-2.45356
YNL261W	ORC5	TFIID	18.8218	1784	-0.0765798	-0.130776	-1.70731	-1.60844	-2.12341
YBR281C	DUG2	TFIID	18.8172	1785	-0.268072	-0.0334422	-2.38159	-2.77993	-2.63808
YLR166C	SEC10	TFIID	18.8142	1786	0.00755135	0.0918965	-2.32439	-2.63169	-2.3571
YEL056W	HAT2	TFIID	18.7969	1787	-0.154608	0.0834373	-2.05175	-2.39576	-2.20839
YJL165C	HAL5	TFIID	18.7968	1788	-0.0905183	0.148657	-1.96191	-2.34106	-2.16899
YOR109W	INP53	TFIID	18.7944	1789	-0.0509063	0.184555	-2.3783	-2.52242	-2.4107
YJL005W	CYR1	TFIID	18.7743	1790	-0.272489	-0.02727	-2.82348	-3.1779	-2.92266
YPL020C	ULP1	TFIID	18.7682	1791	-0.105991	0.124754	-2.26669	-2.10826	-1.84377
YMR001C	CDC5	TFIID	18.7662	1792	-0.190622	0.127449	-1.39216	-2.30887	-2.53448
YOR035C	SHE4	TFIID	18.7654	1793	-0.108999	0.0934199	-2.12717	-2.23821	-2.06637
YCL045C	EMC1	TFIID	18.76	1794	-0.127245	0.239647	-2.10458	-1.97649	-1.78877
YKL186C	MTR2	TFIID	18.745	1795	-0.149562	0.187802	-2.53484	-1.80979	-1.90168
YPL070W	MUK1	TFIID	18.7405	1796	0.0168905	-0.0858266	-2.63141	-2.50665	-2.34655
YKR002W	PAP1	TFIID	18.7225	1797	-0.242203	0.0749895	-2.25688	-2.55818	-2.23063
YBR267W	REI1	TFIID	18.7222	1798	0.0515449	0.278345	-2.93303	-2.0037	-1.94753
YBL078C	ATG8	TFIID	18.721	1799	-0.156126	0.0462711	-1.68558	-2.94777	-2.20184
YER175C	TMT1	TFIID	18.7209	1800	-0.407494	-0.423151	-2.28431	-2.39612	-2.40435
YNL027W	CRZ1	TFIID	18.7151	1801	-0.0940466	0.0768441	-1.96768	-2.32909	-2.19455
YKR018C	YKR018C	TFIID	18.6958	1802	-0.0214763	0.09789	-2.47421	-2.70215	-2.52597
YIL026C	IRR1	TFIID	18.6723	1803	-0.300718	0.0540045	-2.62971	-3.17859	-2.99761
YBL045C	COR1	TFIID	18.6678	1804	-0.136787	0.154496	-1.71112	-2.86022	-2.12589
YOR160W	MTR10	TFIID	18.6637	1805	-0.128128	0.0672255	-2.18677	-2.17122	-1.98749
YJR050W	ISY1	TFIID	18.6622	1806	0.211259	-0.0190682	-3.12482	-2.65273	-2.50197
YJL197W	UBP12	TFIID	18.6614	1807	-0.0890707	0.140792	-2.71813	-2.76544	-2.49937
YGR208W	SER2	TFIID	18.6573	1808	-0.199287	0.0537497	-2.45218	-1.82728	-2.24792
YCL057W	PRD1	TFIID	18.6544	1809	-0.163401	0.011768	-2.0617	-2.59456	-2.36252
YKL130C	SHE2	TFIID	18.6505	1810	-0.315404	0.0252668	-2.49485	-2.27865	-2.32136
YER100W	UBC6	TFIID	18.6334	1811	-0.0870127	0.464105	-2.43665	-2.26544	-2.10875
YER035W	EDC2	CR	18.6288	1812	-0.216313	-0.49741	-1.03387	-3.65787	-3.71145
YGR038W	ORM1	TFIID	18.6193	1813	0.131056	0.0183348	-1.66983	-1.59224	-1.64331
YNL090W	RHO2	TFIID	18.5964	1814	-0.0334478	0.20037	-2.35047	-1.91941	-1.9014
YPR104C	FHL1	TFIID	18.5681	1815	-0.00890934	0.135576	-1.90729	-2.42682	-2.07004
YLR186W	EMG1	TFIID	18.5653	1816	-0.196229	0.184639	-2.09577	-1.8049	-1.8667
YMR300C	ADE4	TFIID	18.549	1817	-0.161866	0.0360199	-2.37677	-2.39303	-2.44948
YHR073W	OSH3	TFIID	18.5482	1818	-0.0867468	0.175658	-2.38448	-2.45299	-2.33933
YBR155W	CNS1	TFIID	18.5478	1819	-0.200472	0.106513	-3.06536	-2.1738	-2.4011
YOL133W	HRT1	TFIID	18.5264	1820	-0.269616	-0.0290777	-2.34167	-2.03935	-2.08689
YFL007W	BLM10	TFIID	18.5263	1821	-0.152115	0.0790224	-1.9961	-2.26126	-2.10685
YGL040C	HEM2	TFIID	18.521	1822	-0.0479479	-0.0792652	-2.57108	-2.43916	-2.69106
YPR020W	ATP20	TFIID	18.5186	1823	0.238719	0.394218	-2.19056	-2.14127	-1.52027
YOR091W	TMA46	TFIID	18.5178	1824	-0.337144	0.20707	-2.62513	-1.94514	-1.90888
YOR108W	LEU9	TFIID	18.5144	1825	-0.10195	0.438037	-1.97536	-1.49425	-1.95898
YBR212W	NGR1	TFIID	18.5023	1826	-0.248697	-0.0237731	-1.76037	-2.383	-2.2148
YOR217W	RFC1	TFIID	18.486	1827	-0.307038	0.177554	-2.54316	-2.68374	-2.41435
YER146W	LSM5	TFIID	18.4816	1828	-0.570401	0.0202627	-3.13916	-2.71535	-2.94928
YPL057C	SUR1	CR	18.4489	1829	-1.0042	-0.839315	-0.680128	-3.38394	-3.58558
YAL059W	ECM1	TFIID	18.4401	1830	-0.107891	0.408644	-3.28071	-1.78105	-1.7534
YOR132W	VPS17	TFIID	18.4378	1831	-0.198452	-0.0227504	-2.42539	-2.37023	-2.41686
YJR010C-A	SPC1	TFIID	18.4294	1832	-0.125964	-0.217417	-2.55825	-2.683	-2.36386
YDL056W	MBP1	TFIID	18.4255	1833	-0.160616	0.229298	-1.87767	-2.24484	-1.92553
YGR252W	GCN5	TFIID	18.4193	1834	-0.210296	0.134464	-2.42133	-2.85163	-2.37268
YPL242C	IQG1	TFIID	18.4127	1835	-0.161386	-0.00974983	-2.42916	-2.26274	-2.36889
YJR011C	YJR011C	TFIID	18.4015	1836	-0.166048	-0.13881	-2.50762	-3.13016	-2.85156
YKL128C	PMU1	TFIID	18.3764	1837	-0.337197	-0.275181	-3.09111	-2.70508	-2.91262
YCR067C	SED4	TFIID	18.3756	1838	-0.280455	0.155852	-2.0148	-2.37083	-2.04475
YLR429W	CRN1	TFIID	18.3672	1839	-0.171984	0.105569	-2.53954	-2.34744	-2.1522
YJL033W	HCA4	TFIID	18.363	1840	0.191824	0.482366	-2.52421	-1.47404	-1.31378
YFR051C	RET2	TFIID	18.3588	1841	-0.0646374	0.157709	-2.11319	-2.1474	-2.0216
YJL198W	PHO90	TFIID	18.3558	1842	-0.0670613	0.192767	-2.63329	-2.31781	-2.56039
YEL053C	MAK10	TFIID	18.341	1843	-0.116684	0.0436697	-1.69147	-2.52362	-2.35853
YBL032W	HEK2	TFIID	18.3395	1844	-0.358284	-0.0349473	-2.29674	-3.06372	-2.83003
YLL001W	DNM1	TFIID	18.3379	1845	-0.169951	0.19771	-1.98457	-2.52955	-2.31522
YIL125W	KGD1	TFIID	18.3279	1846	-0.0894017	0.201303	-1.85571	-2.00636	-1.78722
YIL090W	ICE2	TFIID	18.3235	1847	0.0164687	0.207895	-2.20279	-1.77331	-1.53443
YKR072C	SIS2	TFIID	18.3059	1848	0.0549344	0.246489	-2.33135	-1.95823	-1.96944
YDR485C	VPS72	TFIID	18.2923	1849	-0.107329	0.139106	-2.10832	-2.11263	-1.83219
YDR494W	RSM28	TFIID	18.2901	1850	-0.0349143	0.304325	-2.05948	-2.08212	-1.72575
YOR086C	TCB1	TFIID	18.2826	1851	-0.169161	0.12803	-2.29225	-2.61149	-2.28584
YPR118W	MRI1	TFIID	18.2814	1852	-0.199567	0.00856827	-2.83455	-2.33692	-2.35899
YPR088C	SRP54	TFIID	18.2666	1853	-0.06332	0.248299	-2.40099	-1.97122	-1.87712
YDR181C	SAS4	TFIID	18.2203	1854	0.0198816	0.199314	-1.90615	-2.1389	-1.91937
YJR132W	NMD5	TFIID	18.2079	1855	-0.0290571	0.177038	-2.21778	-1.95403	-1.84278
YAL017W	PSK1	TFIID	18.2058	1856	-0.203454	0.0923182	-2.40816	-2.91027	-2.30458
YGL172W	NUP49	TFIID	18.1922	1857	0.00059329	0.296204	-2.39564	-2.28292	-2.00084
YPR069C	SPE3	CR	18.1818	1858	-0.215565	-0.248707	-2.11947	-1.48618	-2.07118
YPL081W	RPS9A	TFIID	18.1742	1859	-0.197687	0.183465	-1.31154	-1.56661	-1.9544
YMR261C	TPS3	TFIID	18.1628	1860	-0.171051	-0.0368715	-2.34214	-2.84087	-2.60344
YLR414C	PUN1	CR	18.156	1861	-0.602697	-0.915401	-1.44857	-3.46643	-3.6583
YNL147W	LSM7	TFIID	18.1511	1862	-0.228825	0.0373534	-2.59888	-2.68961	-2.51489
YHL027W	RIM101	TFIID	18.147	1863	-0.0693483	0.114168	-2.09189	-1.68141	-1.92171
YER172C	BRR2	TFIID	18.1412	1864	-0.0270941	0.166055	-2.28571	-2.339	-2.14932
YLR328W	NMA1	TFIID	18.136	1865	-0.411043	-0.424161	-3.49313	-3.22407	-3.69796
YNL050C	YNL050C	TFIID	18.1181	1866	0.0555511	0.319346	-2.27542	-2.04102	-1.75595
YNL051W	COG5	TFIID	18.1147	1867	-0.0177818	0.156299	-1.97516	-2.14818	-1.66854
YNL288W	CAF40	TFIID	18.1125	1868	-0.178668	0.249128	-1.98984	-1.95261	-1.85049
YNL182C	IPI3	TFIID	18.1046	1869	-0.0266022	0.238521	-2.88787	-2.07387	-2.07523
YPL234C	VMA11	TFIID	18.0816	1870	-0.0309273	0.133747	-2.73276	-1.8656	-1.84428
YOR273C	TPO4	CR	18.0769	1871	-1.53815	-1.40603	-0.412887	-3.25374	-3.29723
YBL097W	BRN1	TFIID	18.0754	1872	-0.0495501	0.0286556	-2.39585	-3.11766	-2.62614
YNL238W	KEX2	TFIID	18.0684	1873	-0.194212	0.0523389	-1.99151	-2.33441	-2.35883
YDR098C	GRX3	TFIID	18.0661	1874	-0.153494	-0.153718	-2.37216	-2.6011	-2.76183
YLR096W	KIN2	TFIID	18.0634	1875	-0.223376	0.0697159	-1.8429	-2.16513	-1.97219
YOR119C	RIO1	TFIID	18.0559	1876	-0.0826911	0.218881	-3.08389	-2.5005	-2.49179
YNL199C	GCR2	TFIID	18.0263	1877	0.067989	0.247874	-2.47495	-2.23825	-2.10649
YJR062C	NTA1	TFIID	18.0232	1878	-0.0695453	0.137355	-2.07665	-2.25594	-1.96142
YOR211C	MGM1	TFIID	18.0047	1879	0.0418333	0.277832	-2.30902	-2.01363	-2.02058
YFR041C	ERJ5	TFIID	17.9915	1880	-0.0680037	-0.0508329	-2.50724	-2.49854	-2.39553
YFR031C	SMC2	TFIID	17.9897	1881	0.0851944	0.305855	-1.89894	-2.45875	-2.209
YKR064W	OAF3	TFIID	17.964	1882	-0.0190701	-0.0366553	-2.01128	-1.85969	-1.8929
YOR171C	LCB4	TFIID	17.9621	1883	0.09246	0.281682	-2.0816	-1.81183	-1.69117
YIL047C	SYG1	TFIID	17.959	1884	-0.363746	-0.16137	-2.01738	-2.5998	-2.76212
YPL266W	DIM1	TFIID	17.959	1885	-0.158598	0.284144	-3.07539	-1.7591	-1.94669
YEL036C	ANP1	TFIID	17.9147	1886	-0.210719	0.159681	-2.39621	-2.23143	-2.18516
YMR071C	TVP18	TFIID	17.905	1887	-0.313162	-0.294332	-2.32851	-2.4109	-2.51409
YKL008C	LAC1	CR	17.9047	1888	-0.425801	-0.388303	-2.40975	-3.90744	-3.9337
YIL147C	SLN1	TFIID	17.9029	1889	-0.0626967	0.190424	-2.37487	-2.68221	-2.42402
YLR095C	IOC2	TFIID	17.8996	1890	-0.0873425	0.119961	-2.07743	-2.1363	-1.94393
YPL163C	SVS1	CR	17.899	1891	-1.13424	-0.499566	-0.816967	-2.76522	-3.20634
YLR367W	RPS22B	TFIID	17.8951	1892	-0.108839	0.161454	-2.44116	-1.75309	-1.94909
YNL330C	RPD3	TFIID	17.8936	1893	-0.0618041	0.276581	-2.17465	-2.06703	-1.83059
YML071C	COG8	TFIID	17.8534	1894	-0.0662018	0.45945	-2.92336	-3.11648	-2.67632
YBR234C	ARC40	TFIID	17.8396	1895	-0.222957	-0.016039	-2.33241	-2.33251	-2.01586
YHR181W	SVP26	TFIID	17.8347	1896	-0.0616205	0.0598045	-2.84337	-2.582	-2.289
YMR296C	LCB1	TFIID	17.8249	1897	-0.286653	0.0123663	-2.42601	-3.18002	-3.29248
YLR073C	RFU1	TFIID	17.8247	1898	0.127844	0.444439	-2.41195	-1.28507	-1.2021
YPR034W	ARP7	TFIID	17.8155	1899	-0.251629	0.221938	-2.56342	-2.19434	-2.20732
YJL011C	RPC17	TFIID	17.8114	1900	0.295885	0.274106	-2.40715	-2.04716	-1.85381
YAR007C	RFA1	TFIID	17.8103	1901	-0.413983	-0.0340066	-2.36873	-3.07736	-2.92603
YNL062C	GCD10	TFIID	17.8065	1902	-0.00485948	0.151762	-2.57888	-1.73223	-1.88168
YGL129C	RSM23	TFIID	17.8065	1903	-0.0446331	0.174407	-2.04053	-2.21609	-1.94685
YGL111W	NSA1	TFIID	17.8055	1904	0.0531316	0.398619	-2.68959	-1.68919	-1.51677
YLR278C	YLR278C	TFIID	17.8009	1905	-0.256081	-0.112999	-2.65314	-2.97433	-3.43685
YMR304W	UBP15	TFIID	17.7972	1906	-0.120751	-0.0199333	-2.9333	-3.33694	-2.96325
YGR063C	SPT4	TFIID	17.7957	1907	-0.402584	0.159652	-2.0847	-1.9031	-1.87085
YDR216W	ADR1	TFIID	17.7908	1908	-0.152152	-0.262921	-1.57788	-4.41111	-4.80413
YGL178W	MPT5	TFIID	17.7828	1909	0.00401156	0.110573	-1.92629	-2.17379	-2.6406
YHR165C	PRP8	TFIID	17.7755	1910	0.0724628	0.335085	-1.70901	-1.84361	-1.63281
YLR138W	NHA1	TFIID	17.7698	1911	-0.145123	0.0988576	-3.03264	-2.58034	-2.65625
YOL032W	OPI10	TFIID	17.7653	1912	0.144158	0.432213	-2.12458	-3.41548	-3.09557
YMR117C	SPC24	TFIID	17.7475	1913	-0.0941838	-0.109623	-1.65449	-2.87027	-2.70637
YBL040C	ERD2	TFIID	17.7456	1914	0.0122392	0.216214	-1.98537	-1.76619	-1.68127
YER111C	SWI4	TFIID	17.7417	1915	-0.249186	0.0992618	-2.58595	-2.38199	-2.72006
YLR454W	FMP27	TFIID	17.7315	1916	0.00844702	0.127636	-2.30594	-2.34347	-2.09636
YBR073W	RDH54	TFIID	17.7237	1917	-0.14431	0.0318657	-1.63344	-2.56382	-2.51058
YHR118C	ORC6	TFIID	17.7122	1918	-0.186381	-0.0262404	-1.85544	-2.15493	-1.93741
YLR120C	YPS1	TFIID	17.7089	1919	-0.244708	-0.480149	-2.02141	-3.27182	-3.50596
YOL013C	HRD1	TFIID	17.7086	1920	-0.198243	-0.0732038	-2.30809	-2.46854	-2.22237
YMR061W	RNA14	TFIID	17.7064	1921	0.332373	0.316494	-1.284	-0.851961	-0.728498
YHR146W	CRP1	TFIID	17.7003	1922	-0.470932	-0.142123	-2.5134	-2.50286	-2.42034
YBL107C	MIX23	TFIID	17.69	1923	0.184184	0.0555809	-3.6104	-3.47918	-3.28822
YDR159W	SAC3	TFIID	17.6897	1924	0.0979857	0.239213	-1.98065	-1.91705	-1.65064
YCR065W	HCM1	CR	17.6646	1925	-0.545521	-0.155852	-1.08331	-2.62581	-2.80203
YGR147C	NAT2	TFIID	17.6598	1926	0.0338937	0.193259	-1.899	-1.5343	-1.49076
YOR150W	MRPL23	TFIID	17.6528	1927	-0.18337	0.156877	-2.51149	-1.94657	-1.92676
YGL041W-A	YGL041W-A	TFIID	17.6472	1928	-0.0364547	0.207467	-2.76919	-2.87437	-2.47225
YMR145C	NDE1	CR	17.6372	1929	-0.769491	-0.225692	-0.0135848	-2.08763	-2.92638
YML100W	TSL1	CR	17.6368	1930	-1.41628	-1.23706	-0.362849	-4.6434	-4.21775
YCR069W	CPR4	TFIID	17.6327	1931	-0.18974	-0.0152229	-2.39816	-2.47579	-2.34781
YPL116W	HOS3	TFIID	17.6318	1932	-0.286635	-0.168237	-2.35421	-3.40327	-3.04755
YKL010C	UFD4	TFIID	17.6318	1933	-0.015595	0.184641	-1.77812	-1.72944	-1.74429
YBR015C	MNN2	TFIID	17.6314	1934	-0.398458	0.0606302	-2.80317	-2.75345	-2.77833
YCR107W	AAD3	TFIID	17.6289	1935	-0.520436	-0.216494	-2.21926	-2.74484	-2.73825
YJR143C	PMT4	TFIID	17.617	1936	-0.25959	0.104785	-2.59325	-2.42748	-2.56061
YPR073C	LTP1	TFIID	17.6076	1937	0.329484	0.383657	-3.55663	-2.65054	-2.22454
YBL090W	MRP21	TFIID	17.6014	1938	0.111781	0.239337	-2.39306	-2.19838	-1.91867
YMR016C	SOK2	TFIID	17.5999	1939	-0.400302	-0.126941	-1.7455	-2.80817	-3.09017
YNL111C	CYB5	TFIID	17.5978	1940	0.109773	0.122962	-2.56326	-2.5393	-2.9964
YGR081C	SLX9	TFIID	17.597	1941	0.248311	0.285347	-2.61368	-1.74564	-1.65953
YBR095C	RXT2	TFIID	17.5843	1942	0.0627214	0.153193	-2.39218	-2.15406	-1.86548
YDR498C	SEC20	TFIID	17.5823	1943	-0.132436	0.110311	-2.28129	-2.31423	-1.92504
YPR141C	KAR3	TFIID	17.5822	1944	-0.341244	0.0133233	-1.6258	-2.82666	-2.52456
YNR013C	PHO91	TFIID	17.5486	1945	-0.364814	-0.0253719	-2.22616	-2.33687	-2.46247
YML125C	PGA3	TFIID	17.5476	1946	-0.211438	-0.240166	-2.56085	-2.68318	-2.68311
YGL049C	TIF4632	TFIID	17.544	1947	-0.206407	0.101797	-2.56873	-2.80304	-2.54686
YLR226W	BUR2	TFIID	17.5393	1948	0.00345731	-0.00832925	-2.44993	-2.10005	-2.13495
YCL001W	RER1	TFIID	17.5316	1949	-0.291661	0.258688	-2.53663	-2.80403	-2.74812
YPL203W	TPK2	TFIID	17.5303	1950	-0.35032	-0.146405	-1.89133	-3.09379	-2.72925
YHR200W	RPN10	TFIID	17.5253	1951	-0.355271	0.150347	-2.22619	-2.23335	-2.12023
YDR481C	PHO8	TFIID	17.509	1952	0.0890234	0.249507	-1.55245	-3.12404	-3.02156
YER029C	SMB1	TFIID	17.5073	1953	-0.272752	0.140409	-2.61137	-2.32986	-2.25231
YGL125W	MET13	CR	17.5066	1954	-0.25519	-0.159598	-0.0861705	-1.78217	-1.86929
YDL236W	PHO13	TFIID	17.4899	1955	-0.197694	0.242439	-2.44133	-2.5036	-2.23425
YCL017C	NFS1	TFIID	17.4787	1956	-0.220065	-0.0474969	-2.135	-1.91505	-1.76173
YKR074W	AIM29	TFIID	17.4653	1957	0.00311734	-0.0142364	-3.27418	-2.96308	-2.69762
YLR327C	TMA10	CR	17.4549	1958	-0.786424	-0.982688	-1.86808	-5.23953	-5.21615
YDL166C	FAP7	TFIID	17.4482	1959	-0.152133	0.119363	-2.55843	-2.49437	-2.31139
YBR023C	CHS3	TFIID	17.446	1960	-0.20672	0.07685	-2.43671	-2.49509	-2.61728
YHL038C	CBP2	TFIID	17.432	1961	0.0399092	0.0578848	-2.58221	-1.98936	-1.8054
YLR373C	VID22	TFIID	17.4062	1962	-0.184084	-0.0156797	-2.15256	-3.08881	-2.78866
YHR029C	YHI9	TFIID	17.4046	1963	-0.153251	-0.051477	-1.55196	-3.55132	-3.54522
YHL039W	EFM1	TFIID	17.3952	1964	-0.259332	0.149775	-2.24705	-1.73479	-1.95272
YDR093W	DNF2	TFIID	17.3952	1965	-0.148163	-0.0270107	-2.73863	-2.56242	-2.72393
YBL017C	PEP1	TFIID	17.3906	1966	-0.0371818	0.0810912	-2.14403	-2.32259	-2.17573
YLR069C	MEF1	TFIID	17.3846	1967	-0.171763	0.222497	-2.4065	-2.41244	-2.13635
YHR056C	RSC30	TFIID	17.3592	1968	-0.270659	0.0109229	-1.94616	-2.27099	-2.20871
YNL207W	RIO2	TFIID	17.3476	1969	0.0894922	0.349857	-2.60061	-1.36049	-1.34831
YJR054W	KCH1	TFIID	17.3373	1970	-0.179162	-0.0720531	-2.72082	-2.8643	-3.03696
YML110C	COQ5	TFIID	17.3325	1971	-0.317756	0.0102912	-2.55947	-2.26621	-2.24841
YGR136W	LSB1	CR	17.3196	1972	-0.251517	-0.0343621	-1.7256	-2.92645	-2.85225
YPR191W	QCR2	TFIID	17.3183	1973	-0.137605	0.364214	-1.95577	-2.32742	-1.9951
YGL073W	HSF1	TFIID	17.3169	1974	-0.0236015	0.17513	-2.17705	-2.4331	-2.3055
YPL188W	POS5	TFIID	17.3117	1975	0.152924	0.214918	-2.48352	-1.90902	-1.93279
YGR210C	YGR210C	TFIID	17.2984	1976	-0.068756	0.372057	-2.54447	-2.00434	-2.2478
YHR063C	PAN5	TFIID	17.2944	1977	0.114073	0.253166	-2.71229	-2.75195	-2.42169
YML032C	RAD52	TFIID	17.2942	1978	-0.231566	0.0805947	-1.89182	-2.41987	-2.2927
YKR006C	MRPL13	TFIID	17.2927	1979	0.0450927	0.0986251	-2.42898	-2.2204	-2.12469
YDR012W	RPL4B	TFIID	17.2896	1980	-0.198329	0.094275	-2.48842	-2.20773	-2.22846
YNR006W	VPS27	TFIID	17.288	1981	-0.208946	-0.0662301	-2.31742	-2.62123	-2.53279
YOR230W	WTM1	CR	17.2828	1982	-0.60187	-0.4432	-1.92351	-2.97907	-3.27235
YLR419W	YLR419W	TFIID	17.2777	1983	-0.00562841	0.166627	-2.15754	-2.13901	-1.86129
YCR043C	YCR043C	TFIID	17.2742	1984	-0.408516	-0.00944811	-2.59657	-2.58851	-2.32343
YJL072C	PSF2	TFIID	17.2733	1985	0.127801	0.255267	-1.92866	-2.37421	-1.8895
YIL151C	ESL1	TFIID	17.2721	1986	0.122058	0.370905	-1.77831	-1.70546	-1.41658
YOL062C	APM4	TFIID	17.2717	1987	-0.223173	0.0892758	-2.21085	-2.41497	-2.21113
YML081W	TDA9	TFIID	17.2617	1988	-0.0600602	0.0871451	-1.93986	-2.03925	-1.84987
YIL063C	YRB2	TFIID	17.2448	1989	-0.253544	0.186724	-2.79242	-3.24465	-2.86504
YDR524C	AGE1	TFIID	17.2367	1990	0.331508	0.568783	-1.29538	-0.871286	-1.24623
YKL023W	YKL023W	TFIID	17.2256	1991	-0.257251	0.0709147	-2.38732	-2.86134	-2.50372
YOR299W	BUD7	TFIID	17.2204	1992	-0.141346	0.0449969	-2.43953	-2.63903	-2.3624
YPR115W	RGC1	TFIID	17.2078	1993	-0.199332	0.0204815	-2.13099	-2.34105	-2.64301
YDR244W	PEX5	TFIID	17.2059	1994	-0.125858	0.0143377	-1.70744	-2.16992	-2.2372
YIL008W	URM1	TFIID	17.1996	1995	0.123806	0.325662	-3.95448	-2.36442	-2.04181
YGL036W	YGL036W	TFIID	17.1906	1996	-0.06108	0.0928437	-2.36669	-2.72228	-2.80902
YDR531W	CAB1	TFIID	17.1879	1997	0.0490185	0.0200649	-2.62782	-2.52501	-2.46414
YBL005W	PDR3	TFIID	17.1851	1998	-0.309526	-0.268398	-2.3194	-2.59815	-2.73994
YPR055W	SEC8	TFIID	17.175	1999	-0.0648121	0.109414	-1.96463	-2.21465	-1.96648
[truncated: 2,900 more rows]
