# Supplementary material for: Two roles for the yeast transcription coactivator SAGA and a set of genes redundantly regulated by TFIID and SAGA
Source: eLife. 2020 Jan 8;9:e50109. doi: 10.7554/eLife.50109 (PMC6977968; doi:10.7554/eLife.50109)
Supplement: Supplementary file 6. — Data for other strains, results of k-means clustering and average expression per gene are the same as shown in Supplementary file 3. Rows are sorted by the average expression. [file elife-50109-supp6.xlsx]

## Sheet: Supp File 6
gene_id	gene_name	class	expression	expression_rank	spt3_del	Spt3_7_GC	gcn5_del	ubp8_del
YPR036W-A	SPO24	CR	1605.62	1	-1.45435	-0.117938	0.344838	-0.597791
YLR109W	AHP1	CR	732.796	2	-2.44952	-0.374501	-1.52209	-0.82104
YHR179W	OYE2	CR	690.266	3	-1.55072	-0.362166	-1.45124	-0.874107
YGR209C	TRX2	CR	604.756	4	-2.22147	-0.825282	-1.92454	-1.32823
YOL151W	GRE2	CR	550.24	5	-2.31681	-0.893803	-0.961214	-1.02875
YGR192C	TDH3	CR	550.045	6	-2.98626	-0.540739	-1.34636	-0.654541
YOL109W	ZEO1	CR	542.509	7	-2.91629	-1.50146	-0.660447	-0.245787
YLR110C	CCW12	CR	436.509	8	-2.46484	-0.442795	-1.12585	-0.480199
YDL184C	RPL41A	TFIID	422.926	9	-0.609496	0.185331	-1.45638	-0.306054
YDL133C-A	RPL41B	TFIID	420.731	10	-0.314736	-0.0103405	0.105058	0.130911
YDR524C-B	YDR524C-B	CR	409.177	11	-1.37503	-0.410289	-0.86565	-0.746054
YGL008C	PMA1	CR	408.467	12	-2.82962	-0.928085	-1.13185	-0.553769
YPL240C	HSP82	CR	398.202	13	-3.54174	-0.534931	-3.87356	-1.48816
YMR186W	HSC82	CR	383.734	14	-2.47579	-0.319269	-2.23836	-0.718803
YBR244W	GPX2	CR	378.81	15	-2.7243	-1.16647	-0.825678	-0.92814
YNL134C	YNL134C	CR	370.296	16	-1.54557	-0.415455	-1.65927	-0.937816
YHR174W	ENO2	CR	357.248	17	-3.26076	-0.559424	-1.49252	-0.420552
YCR012W	PGK1	CR	346.842	18	-3.36294	-0.862946	-1.75084	-0.767239
YGR142W	BTN2	CR	342.685	19	-3.48946	-0.160191	-4.19614	-1.14994
YML028W	TSA1	CR	335.079	20	-1.97105	-0.373795	-1.66816	-0.787599
YOR298C-A	MBF1	CR	324.496	21	-2.45833	-0.314172	-2.41925	-0.687931
YLR075W	RPL10	CR	318.658	22	-0.649369	0.0876307	-0.639893	-0.329463
YLL024C	SSA2	CR	317.379	23	-2.85417	-0.664105	-2.64574	-0.764175
YKL152C	GPM1	CR	311.268	24	-2.68525	-0.770614	-2.0163	-0.572932
YML131W	YML131W	CR	307.081	25	-2.40573	-1.00211	-0.466274	-1.18241
YCR024C-A	PMP1	CR	295.357	26	-2.56171	-0.782378	-1.18834	-0.376029
YOR153W	PDR5	CR	294.463	27	-3.64695	-1.65137	-1.67271	-0.833261
YPL187W	MF(ALPHA)1	CR	288.694	28	-2.64972	-1.02291	-9.04728	0.0811299
YLR460C	YLR460C	CR	286.623	29	-2.42876	-0.980658	-1.6958	-0.92891
YDR353W	TRR1	CR	280.192	30	-2.09271	-0.469774	-1.93884	-0.972499
YGR055W	MUP1	CR	273.711	31	-1.4896	-0.765691	-0.192254	-0.567193
YJR104C	SOD1	CR	265.484	32	-3.35608	-0.905276	-1.84581	-1.25104
YDR011W	SNQ2	CR	263.237	33	-3.36166	-1.26514	-0.453776	-1.06157
YNL031C	HHT2	CR	252.641	34	-1.65955	-0.339152	-0.42475	-0.313218
YGR155W	CYS4	CR	252.116	35	-2.51164	-1.2543	-1.46526	-0.670282
YKL060C	FBA1	CR	251.879	36	-3.22626	-1.09013	-1.55571	-0.608159
YEL017C-A	PMP2	CR	251.507	37	-2.06433	-0.773911	-2.44906	-1.41741
YAL005C	SSA1	CR	250.882	38	-4.27861	-0.690611	-3.9303	-1.82622
YPL061W	ALD6	CR	249.455	39	-2.25857	-0.662206	-0.83856	-0.744819
YJR045C	SSC1	CR	240.684	40	-2.23698	-0.246038	-1.8393	-0.853009
YAL038W	CDC19	CR	237.015	41	-2.67463	-0.828821	-1.20022	-0.49681
YLL026W	HSP104	CR	228.336	42	-4.34326	-0.754785	-3.69291	-2.07578
YNL030W	HHF2	CR	224.54	43	-1.77555	-0.479658	-0.595931	-0.355002
YBR008C	FLR1	CR	219.549	44	-1.79989	-1.22587	-2.90238	-2.07218
YLR249W	YEF3	CR	217.065	45	-1.20677	-0.286781	-0.8561	-0.189742
YDR050C	TPI1	CR	209.999	46	-3.04289	-0.873247	-1.42964	-0.508836
YOR369C	RPS12	TFIID	208.999	47	-0.344868	0.143565	-0.552904	-0.0729687
YGR234W	YHB1	CR	208.545	48	-3.47452	-1.42689	-3.75846	-0.680154
YER091C	MET6	CR	207.503	49	-0.872183	-1.26948	-0.885358	-0.0951407
YJL034W	KAR2	CR	197.429	50	-2.73471	-0.534255	-1.94948	-1.19421
YLR355C	ILV5	CR	192.207	51	-1.35475	-0.274351	-0.847531	-0.194257
YCL026C-A	FRM2	CR	185.836	52	-1.18119	-1.08593	1.54612	-0.629817
YIL053W	GPP1	CR	185.484	53	-1.56192	-1.31166	-0.273213	-0.470158
YDR224C	HTB1	CR	184.403	54	-2.06444	-0.446571	-1.13083	-0.628776
YDR225W	HTA1	CR	182.733	55	-1.99755	-0.469977	-0.645486	-0.637988
YLR044C	PDC1	CR	181.864	56	-2.33005	-0.773388	-1.05988	-0.431323
YLR325C	RPL38	TFIID	180.674	57	-0.97313	0.0382266	-0.907741	-0.176461
YLR108C	YLR108C	CR	180.476	58	-2.53189	-0.442662	-1.11909	-0.927877
YJR123W	RPS5	TFIID	180.228	59	-1.14901	-0.0648617	-1.05943	-0.253919
YNL178W	RPS3	TFIID	180.052	60	-0.790407	0.0906211	-0.733773	-0.211791
YLR167W	RPS31	TFIID	179.196	61	-0.522775	0.100617	-0.967196	-0.16735
YNL007C	SIS1	CR	177.849	62	-2.51114	-0.19703	-2.24085	-1.01844
YBR009C	HHF1	CR	176.935	63	-2.29016	-0.719247	-1.18193	-0.667302
YHL015W	RPS20	TFIID	175.724	64	-1.35964	-0.123066	-0.693959	-0.137095
YBR101C	FES1	TFIID	172.692	65	-2.10982	0.145893	-1.83465	-0.690207
YNL064C	YDJ1	TFIID	172.267	66	-1.6827	0.0333981	-1.77373	-0.514534
YOR020C	HSP10	TFIID	165.373	67	-1.36756	0.258	-1.50112	-0.782548
YDL081C	RPP1A	TFIID	165.057	68	-1.00107	0.0228181	-0.96419	-0.26519
YBL002W	HTB2	CR	162.427	69	-1.90328	-0.635005	-1.30637	-0.61017
YEL009C	GCN4	CR	157.785	70	-0.859405	-0.0324076	-0.210462	-0.156496
YOR027W	STI1	CR	157.598	71	-3.15612	-0.424392	-2.35855	-1.08838
YHR055C	CUP1-2	CR	157.103	72	-1.64145	-0.0381187	-0.982859	-1.66776
YDL124W	YDL124W	CR	156.423	73	-3.58347	-2.20084	-3.48825	-1.88207
YDL055C	PSA1	CR	153.993	74	-2.18951	-0.965394	-1.19571	-0.245585
YEL034W	HYP2	CR	153.263	75	-2.07503	-0.561541	-1.28932	-0.501632
YBR010W	HHT1	CR	153.228	76	-1.78847	-0.36909	-1.13264	-0.878373
YPL106C	SSE1	TFIID	152.571	77	-1.40219	0.145214	-1.89568	-0.82851
YEL071W	DLD3	CR	151.867	78	-2.1635	-1.1258	-1.31434	-0.441407
YAL003W	EFB1	CR	150.864	79	-1.5805	-0.162158	-1.63982	-0.269709
YMR058W	FET3	CR	150.834	80	-2.15224	-0.811915	-0.68034	-1.31813
YDR382W	RPP2B	TFIID	150.718	81	-1.1155	-0.0247859	-1.08054	-0.250973
YCR005C	CIT2	CR	150.337	82	-1.38413	-0.734907	-0.861866	-0.464885
YEL046C	GLY1	CR	150.286	83	-2.35089	-0.589313	-0.237927	-0.328155
YLR441C	RPS1A	TFIID	149.781	84	-1.0337	-0.0862712	-0.665007	-0.326763
YOL086C	ADH1	CR	149.345	85	-3.17203	-1.27239	-1.27575	0.527158
YMR318C	ADH6	CR	146.363	86	-0.965654	-0.737823	-2.26257	-1.41493
YPR149W	NCE102	CR	146.055	87	-4.55961	-0.941867	-1.91542	-0.964194
YKL096W-A	CWP2	CR	145.242	88	-3.55036	-1.11437	-3.29814	-1.18574
YKL056C	TMA19	CR	142.595	89	-1.14193	-0.480498	-1.45219	-0.26266
YCR024C-B	YCR024C-B	CR	139.909	90	-2.507	-0.621608	-1.23921	-0.495649
YGL253W	HXK2	CR	136.334	91	-1.43631	-0.50292	-1.08273	-0.54632
YLR259C	HSP60	TFIID	136.203	92	-1.89188	-0.0414992	-1.71623	-1.01884
YPL131W	RPL5	TFIID	132.503	93	-0.964509	-0.0692841	-1.04887	-0.353509
YBL003C	HTA2	CR	130.675	94	-2.07379	-0.76053	-1.4033	-0.640037
YOR063W	RPL3	CR	130.16	95	-0.885646	-0.148956	-0.60042	-0.103314
YDL020C	RPN4	CR	125.6	96	-0.779371	0.332209	-0.434044	-0.789213
YNL231C	PDR16	CR	123.717	97	-2.59228	-1.15579	-0.198953	-0.415826
YHR162W	MPC2	CR	122.019	98	-2.06359	-0.655795	-0.878135	-0.90832
YCL026C-B	HBN1	CR	121.064	99	-0.812568	-0.810593	0.0249284	-0.470937
YOL039W	RPP2A	TFIID	120.244	100	-1.35553	-0.096151	-0.943853	-0.147287
YKL081W	TEF4	CR	118.852	101	-1.13912	0.087771	-1.42114	-0.463463
YDL061C	RPS29B	TFIID	118.42	102	-1.14051	-0.272666	-0.805406	-0.237297
YJL101C	GSH1	CR	117.679	103	-1.8252	-0.647929	-1.88117	-0.841013
YJL190C	RPS22A	TFIID	117.11	104	-1.22998	-0.152958	-1.11624	-0.315784
YLR216C	CPR6	TFIID	116.195	105	-2.53614	-0.126757	-3.14942	-1.05103
YLR029C	RPL15A	TFIID	115.988	106	-0.473018	0.0183811	-0.805655	-0.3188
YKR071C	DRE2	CR	115.818	107	-0.914953	-0.00555427	-1.63719	-0.651211
YOR302W	YOR302W	CR	115.526	108	-1.7834	-1.15985	1.18648	-0.775983
YDR502C	SAM2	CR	114.83	109	-3.47858	-1.1782	-2.68401	-0.556549
YDR033W	MRH1	CR	114.772	110	-4.79835	-1.97867	-3.67261	-0.89849
YPR065W	ROX1	CR	113.602	111	-1.73935	-0.520366	-0.891401	-1.2895
YLR340W	RPP0	TFIID	113.421	112	-1.03405	-0.0102011	-1.08107	-0.344076
YLR264W	RPS28B	TFIID	111.939	113	-1.17027	-0.118165	-0.748677	-0.468037
YER131W	RPS26B	TFIID	111.735	114	-0.994326	-0.141217	-0.95572	-0.114441
YBL092W	RPL32	TFIID	111.405	115	-1.25189	0.0403437	-1.2257	-0.432902
YJR009C	TDH2	CR	110.337	116	-3.67217	-1.46242	-1.63385	-0.491431
YDR135C	YCF1	CR	108.314	117	-1.34457	-0.451515	-1.26321	-1.18039
YPL250C	ICY2	CR	106.919	118	-0.625508	-0.296734	1.54611	-1.10577
YML063W	RPS1B	TFIID	106.714	119	-1.37611	-0.133987	-0.872647	-0.334813
YCR102C	YCR102C	CR	106.068	120	-2.89563	-1.42554	-1.7306	-0.794013
YGL255W	ZRT1	CR	105.848	121	-3.31367	-1.35578	-0.734624	-1.67396
YAL012W	CYS3	CR	105.723	122	-1.1957	-0.691426	-1.2529	-0.423476
YBR196C	PGI1	CR	105.328	123	-1.97158	-0.269135	-1.16092	-0.817313
YGR027C	RPS25A	TFIID	105.297	124	-0.89133	0.0222814	-0.724417	-0.238089
YER043C	SAH1	CR	105.153	125	-2.48752	-0.351485	-2.07478	-0.827765
YMR251W-A	HOR7	CR	104.822	126	-2.53611	-0.675693	-2.02505	-2.2228
YML116W	ATR1	CR	104.576	127	-0.710386	-0.526156	-0.0210681	-0.705866
YJL159W	HSP150	CR	104.183	128	-2.01278	-0.328919	-0.871895	-0.379085
YGL123W	RPS2	TFIID	103.652	129	-0.998667	-0.018302	-0.679112	-0.185807
YBR078W	ECM33	CR	103.292	130	-2.16302	-0.753059	-0.955232	-0.483902
YEL054C	RPL12A	TFIID	102.41	131	-1.0939	-0.0445484	-1.14641	-0.143961
YGL189C	RPS26A	TFIID	101.88	132	-1.13768	-0.141722	-1.23043	-0.32316
YER177W	BMH1	CR	101.302	133	-2.94273	-0.586666	-2.65656	-0.707262
YBR068C	BAP2	CR	100.821	134	-1.36931	-0.34812	0.266623	-0.545997
YHR143W	DSE2	CR	100.425	135	-2.64056	-0.691539	-1.82077	-0.804186
YHR071W	PCL5	CR	100.389	136	-1.79368	-1.33423	0.561516	-0.903719
YHR018C	ARG4	CR	100.098	137	-0.749065	0.0652473	-0.427381	-1.31472
YOR052C	TMC1	CR	100.054	138	-1.22361	-0.544825	-2.11553	-0.863298
YGR157W	CHO2	CR	100.015	139	-2.45352	0.0402532	-1.68633	-0.771255
YGR148C	RPL24B	TFIID	99.8962	140	-1.32228	-0.173342	-0.784336	-0.33044
YOR167C	RPS28A	TFIID	97.8907	141	-1.11042	0.219805	-1.17592	-0.520863
YML130C	ERO1	CR	97.6653	142	-1.80648	-0.333837	-1.86077	-1.07753
YDR258C	HSP78	TFIID	97.0459	143	-2.90389	-0.666813	-2.06787	-1.93352
YMR307W	GAS1	CR	96.3658	144	-2.64635	-0.763688	-0.902049	-0.597396
YLR286C	CTS1	CR	96.2365	145	-3.16821	-1.52235	-2.15845	-0.603522
YHL033C	RPL8A	TFIID	96.1265	146	-0.980541	0.0263032	-0.980388	-0.172663
YHR072W-A	NOP10	TFIID	95.6929	147	-0.930744	0.0822771	-0.779068	-0.105423
YDR418W	RPL12B	TFIID	95.091	148	-1.18034	-0.196316	-1.09227	-0.402372
YHR005C-A	TIM10	TFIID	93.1628	149	-1.42452	-0.0308843	-1.54748	-0.894738
YFL039C	ACT1	TFIID	92.5367	150	-1.85214	-0.070516	-1.67038	-0.836345
YDR513W	GRX2	CR	91.7493	151	-1.63712	-0.262213	-1.98379	-1.72294
YDL192W	ARF1	TFIID	91.176	152	-1.41939	-0.290795	-1.44857	-0.814406
YER145C	FTR1	CR	90.9382	153	-2.58743	-0.96878	-0.28517	-1.06706
YGL089C	MF(ALPHA)2	CR	89.3796	154	-1.28229	-1.58327	-9.17742	0.791247
YDR037W	KRS1	CR	88.9398	155	-0.970847	-0.326027	-0.813338	-0.800967
YDR132C	YDR132C	CR	88.8416	156	-1.76036	-0.262494	-1.9156	-1.10061
YDL147W	RPN5	TFIID	88.2198	157	-1.59908	-0.168897	-1.42525	-0.679663
YLR333C	RPS25B	TFIID	87.8905	158	-1.54824	-0.211486	-1.06968	-0.412551
YOR198C	BFR1	TFIID	87.4763	159	-1.49702	-0.121507	-1.12454	-0.790858
YPR145W	ASN1	CR	87.3877	160	-2.151	-0.250784	0.491768	-1.20084
YGR211W	ZPR1	TFIID	87.2756	161	-1.82415	0.00210044	-1.50119	-0.47081
YER052C	HOM3	CR	87.1422	162	-0.527948	0.0704796	-0.744424	-1.07448
YLR197W	NOP56	TFIID	86.9907	163	-1.23176	0.00211632	-1.33596	-0.484866
YPR080W	TEF1	CR	86.2436	164	-0.702875	0.0418426	-1.10542	-0.381637
YKR042W	UTH1	CR	85.532	165	-2.50001	-0.94986	-0.979029	-0.780795
YML123C	PHO84	CR	85.3764	166	-6.39603	-0.979018	-10.8766	-0.962797
YER124C	DSE1	CR	85.2327	167	-2.15799	-0.481571	-1.41258	-0.416705
YBR118W	TEF2	CR	84.8821	168	-1.2844	0.124395	-0.896747	-0.424291
YOL040C	RPS15	TFIID	84.7745	169	-1.23233	-0.0131982	-1.06946	-0.212247
YLR293C	GSP1	TFIID	84.5577	170	-1.06511	-0.167867	-1.40307	-0.624961
YEL027W	VMA3	TFIID	84.2145	171	-1.27073	-0.197672	-1.28454	-0.763349
YLR304C	ACO1	CR	84.0657	172	-3.15374	-1.17128	-2.36505	-0.28404
YGR282C	BGL2	TFIID	83.6392	173	-1.72613	-0.473923	-1.52867	-1.04168
YDL229W	SSB1	TFIID	83.1201	174	-1.18788	-0.0742086	-1.02811	-0.347332
YKL216W	URA1	CR	83.0541	175	-2.0062	-0.0431319	-1.3186	-0.0477683
YDR099W	BMH2	TFIID	83.0249	176	-1.6046	-0.05653	-1.61157	-1.04498
YBR025C	OLA1	TFIID	82.7597	177	-1.35311	0.132584	-1.31697	-0.411434
YGR169C-A	LSO2	TFIID	82.754	178	-1.79305	0.0147254	-1.44654	-0.510187
YKL068W-A	YKL068W-A	CR	82.4073	179	-0.607246	-1.03634	-0.875188	-0.265838
YPL237W	SUI3	TFIID	82.2523	180	-1.41496	-0.0988407	-1.22843	-0.755484
YDR002W	YRB1	TFIID	82.0467	181	-1.07127	-0.270875	-1.54208	-0.671265
YDL182W	LYS20	CR	81.7164	182	-1.06468	-0.838142	1.02867	-0.902449
YGL031C	RPL24A	TFIID	80.7393	183	-1.23369	-0.139183	-0.966235	-0.387234
YMR309C	NIP1	TFIID	80.4077	184	-1.44685	-0.0307455	-1.14186	-0.79835
YLL060C	GTT2	CR	80.0647	185	-2.13824	-1.32562	-2.32958	-1.44315
YDR086C	SSS1	TFIID	79.5043	186	-1.34892	0.0415297	-1.17646	-0.705667
YDR276C	PMP3	CR	79.2983	187	-2.64002	-1.0814	-2.0403	-0.920474
YDR533C	HSP31	CR	79.0106	188	-4.23431	-1.43324	-1.79797	-1.14127
YDR497C	ITR1	CR	78.9268	189	-3.85272	-0.817407	-2.58382	-1.04334
YLL045C	RPL8B	TFIID	78.9013	190	-1.04815	0.0547562	-0.689006	-0.142457
YLR214W	FRE1	CR	78.544	191	-1.17331	-0.737031	-0.138654	-1.11151
YDR155C	CPR1	CR	77.458	192	-2.11918	-0.348814	-2.95029	-0.799414
YDR171W	HSP42	CR	76.6874	193	-4.67759	-0.234542	-4.47047	-2.42827
YLR150W	STM1	TFIID	76.5848	194	-1.43478	0.035445	-1.0908	-0.43159
YOR007C	SGT2	TFIID	76.436	195	-1.51941	0.105562	-2.04184	-0.714788
YDR363W-A	SEM1	TFIID	75.5557	196	-1.53939	-0.091446	-1.2275	-0.541852
YDL232W	OST4	TFIID	75.2511	197	-1.54437	0.0368204	-1.34023	-0.728906
YGL054C	ERV14	TFIID	75.0648	198	-1.44297	-0.032266	-1.67522	-0.813789
YNL209W	SSB2	TFIID	74.5681	199	-1.04599	0.0225333	-1.13675	-0.77297
YNL067W	RPL9B	TFIID	74.5338	200	-0.958825	-0.0149368	-1.07646	-0.421808
YOR136W	IDH2	CR	74.4276	201	-2.58142	-1.00683	-2.26988	-0.52682
YNL036W	NCE103	CR	74.3026	202	-1.08259	-1.3222	-1.52549	-2.1537
YJR007W	SUI2	TFIID	74.2161	203	-0.955974	-0.0279907	-1.31632	-0.565154
YPL037C	EGD1	TFIID	73.9562	204	-1.50601	0.0464852	-1.32726	-0.642073
YIL138C	TPM2	TFIID	73.7118	205	-1.11821	0.340165	-1.53162	-0.825611
YOL139C	CDC33	TFIID	73.6055	206	-1.18768	0.0102956	-1.25687	-0.71872
YPR165W	RHO1	TFIID	73.1174	207	-1.91827	-0.149765	-1.51681	-0.886637
YBR143C	SUP45	TFIID	73.0813	208	-1.39687	0.0703219	-1.01143	-0.518214
YDR345C	HXT3	CR	72.5823	209	-2.13921	-1.35311	-0.647077	-0.636604
YPR035W	GLN1	CR	72.367	210	-1.81473	-0.0260272	-0.931898	-0.62116
YNL281W	HCH1	TFIID	72.2492	211	-1.61741	0.2633	-2.07937	-0.782148
YER165W	PAB1	TFIID	72.1428	212	-1.21742	-0.0430789	-1.33	-0.664601
YNL244C	SUI1	TFIID	71.4351	213	-0.63184	0.167225	-1.28888	-0.44894
YDL084W	SUB2	TFIID	70.7871	214	-1.90778	0.0740245	-1.39653	-0.97
YMR038C	CCS1	CR	70.6318	215	-2.30132	-0.835946	-2.30995	-0.947834
YNL069C	RPL16B	TFIID	70.3635	216	-1.21868	-0.0166582	-0.935619	-0.291032
YBR082C	UBC4	TFIID	70.1835	217	-1.87054	0.0164362	-1.82235	-0.90177
YBR079C	RPG1	TFIID	70.1096	218	-1.51099	0.00694591	-1.30853	-0.823324
YOR226C	ISU2	CR	70.0025	219	-1.71605	-0.725763	-1.22085	-0.829025
YLR043C	TRX1	TFIID	69.9705	220	-1.73725	-0.166425	-1.43782	-0.794007
YPL091W	GLR1	CR	69.9552	221	-1.94776	-0.566215	-1.98053	-1.10614
YOR383C	FIT3	CR	69.9197	222	-1.25633	-0.46993	-0.176882	-1.49789
YMR260C	TIF11	TFIID	69.8208	223	-1.39637	-0.00567806	-1.29694	-0.639871
YGL135W	RPL1B	TFIID	69.6447	224	-1.04588	-0.144941	-0.577526	-0.0352201
YOR344C	TYE7	CR	69.5083	225	-3.4025	-0.646948	-2.1064	-0.783238
YJR109C	CPA2	CR	69.4964	226	-0.40202	0.128517	0.574407	-1.55694
YKL172W	EBP2	TFIID	69.2911	227	-1.26566	0.141923	-0.912545	-0.327862
YGR240C	PFK1	CR	69.1595	228	-1.96515	-0.625182	-1.01431	-0.630331
YNL255C	GIS2	TFIID	69.1051	229	-0.728187	0.0743579	-0.699175	0.0376887
YPR158W	CUR1	TFIID	69.0953	230	-2.62962	0.15702	-3.23187	-0.99737
YBR189W	RPS9B	TFIID	69.0109	231	-1.34524	-0.167109	-0.700755	-0.420071
YPL225W	YPL225W	TFIID	68.9535	232	-1.48669	0.0669283	-1.39058	-0.777135
YNL327W	EGT2	CR	68.8723	233	-2.83446	-0.540072	-1.08273	-0.624906
YGR085C	RPL11B	TFIID	68.1945	234	-1.04411	-0.0483828	-0.680221	-0.180191
YKL182W	FAS1	CR	67.5725	235	-3.51399	-0.781747	-1.37449	-0.682828
YAL035W	FUN12	TFIID	67.2435	236	-1.57938	0.137877	-1.28875	-0.780799
YHR008C	SOD2	CR	67.0117	237	-2.36883	-0.788236	-2.58399	-1.19182
YER036C	ARB1	TFIID	66.684	238	-1.34954	-0.181484	-1.81201	-0.843785
YLR346C	YLR346C	CR	66.4489	239	-2.75037	-1.76251	-0.999092	-0.705632
YBR085C-A	YBR085C-A	CR	66.4336	240	-2.67136	-1.45296	-2.48138	-1.28159
YLR300W	EXG1	CR	65.9487	241	-3.11995	-2.03283	-1.38167	-0.533339
YER048W-A	ISD11	TFIID	65.8733	242	-0.617802	-0.0445411	-1.06639	-0.868018
YOR096W	RPS7A	TFIID	65.8363	243	-1.25722	-0.0520218	-0.398428	-0.0219655
YMR116C	ASC1	TFIID	65.5432	244	-1.31146	-0.123674	-0.554683	-0.412963
YOR210W	RPB10	TFIID	65.2448	245	-1.47116	-0.048213	-1.25071	-0.503956
YPL231W	FAS2	CR	65.0179	246	-2.89724	-0.677107	-1.77575	-0.881455
YDR194C	MSS116	TFIID	64.6723	247	-1.20449	0.118108	-1.43226	-0.618608
YKL043W	PHD1	CR	64.631	248	-3.19371	-0.891811	-1.36135	-1.58027
YDL168W	SFA1	CR	64.3543	249	-1.79081	-0.770999	-1.06682	-0.823984
YML091C	RPM2	CR	64.2737	250	-1.51685	-0.514771	-0.906918	-1.10502
YER021W	RPN3	TFIID	64.0937	251	-1.74558	-0.252018	-1.67602	-0.780788
YNL079C	TPM1	TFIID	63.8203	252	-1.61212	0.0270964	-1.53733	-0.989023
YGL028C	SCW11	CR	63.7065	253	-1.76663	-0.339738	-1.35963	-0.5927
YCL050C	APA1	TFIID	63.3754	254	-1.8753	0.0705294	-1.64078	-0.672909
YOR204W	DED1	CR	63.3389	255	-1.73488	-0.277793	-0.631364	-0.827161
YPL135W	ISU1	CR	62.7801	256	-0.762429	-0.567693	-0.50222	-1.13951
YNL131W	TOM22	TFIID	62.3151	257	-1.47035	0.0611479	-1.53573	-0.938857
YML106W	URA5	TFIID	62.2444	258	-1.39793	0.0716562	-1.21529	-0.655724
YHR193C	EGD2	TFIID	62.0771	259	-1.53223	-0.0196569	-1.6237	-0.822424
YOL127W	RPL25	TFIID	62.0679	260	-1.07655	-0.120558	-0.856608	-0.329447
YLR372W	ELO3	TFIID	61.6883	261	-1.38552	-0.237827	-1.43184	-0.75271
YOR382W	FIT2	CR	61.6694	262	-2.50812	-1.13544	0.334547	-2.08152
YGR118W	RPS23A	TFIID	61.578	263	-1.2358	-0.175966	-0.885077	-0.49346
YKL164C	PIR1	CR	61.5158	264	-2.28659	-0.289548	-1.62668	-0.460552
YLR048W	RPS0B	TFIID	61.4893	265	-1.3159	-0.0685273	-0.924343	-0.344799
YHR082C	KSP1	TFIID	61.3711	266	-2.35138	0.0247146	-1.67636	-0.945119
YLR175W	CBF5	TFIID	61.3347	267	-1.2309	0.0566611	-1.26548	-0.709032
YGR254W	ENO1	CR	61.2951	268	-4.33787	-1.63357	-2.73543	-1.72264
YGR159C	NSR1	TFIID	61.2732	269	-0.275011	-0.144216	-0.723644	0.132616
YCR021C	HSP30	CR	61.1662	270	-4.98252	-1.13498	-4.06583	-2.83107
YEL040W	UTR2	CR	60.9792	271	-3.23894	-0.77862	-0.346471	-0.0875034
YKL082C	RRP14	TFIID	60.9624	272	-1.08332	0.139434	-0.937756	-0.210612
YBR109C	CMD1	TFIID	60.9085	273	-1.60072	-0.10749	-1.03931	-0.820643
YNL287W	SEC21	TFIID	60.8467	274	-2.14184	-0.0965837	-1.28865	-0.908326
YML058W	SML1	CR	60.8035	275	-1.88348	-0.543724	-1.24274	-0.587907
YDR071C	PAA1	TFIID	60.7172	276	-1.51816	0.0180851	-1.33685	-0.813064
YER025W	GCD11	TFIID	60.6661	277	-1.42264	0.149251	-0.997419	-0.538694
YDL243C	AAD4	CR	60.5882	278	-0.911811	-1.12498	-1.83217	-1.39341
YLR136C	TIS11	CR	60.2221	279	-1.66677	-1.10012	-1.63193	-1.67007
YBR011C	IPP1	TFIID	60.0466	280	-0.533204	0.0492429	-1.20441	-0.751224
YEL026W	SNU13	TFIID	59.5419	281	-0.685312	0.168699	-1.26396	-0.498791
YNL121C	TOM70	TFIID	59.5032	282	-1.79287	0.0288156	-1.2763	-0.878031
YDL126C	CDC48	TFIID	59.2287	283	-1.63882	-0.153607	-1.90168	-1.14002
YPR132W	RPS23B	TFIID	58.766	284	-1.15132	-0.178273	-0.922388	-0.367883
YBR162C	TOS1	CR	58.7369	285	-1.5906	-0.334983	-0.801454	-0.642704
YLR180W	SAM1	CR	58.6798	286	-2.1814	-1.10448	-0.748305	0.260512
YPR133W-A	TOM5	TFIID	58.5921	287	-1.39584	0.0525114	-1.27172	-0.787892
YJL148W	RPA34	TFIID	58.5756	288	-0.770005	-0.00555232	-0.846323	-0.103951
YGR264C	MES1	TFIID	58.3123	289	-1.29512	-0.0884693	-1.04186	-0.664806
YJL124C	LSM1	TFIID	58.308	290	-1.73417	-0.0826195	-1.33051	-0.650574
YBL076C	ILS1	TFIID	58.282	291	-1.2203	-0.0429827	-0.818681	-0.784001
YLL028W	TPO1	CR	58.1623	292	-4.615	-2.02095	-1.65033	-1.16051
YER148W	SPT15	TFIID	57.9149	293	-0.973799	-0.183438	-1.42646	-0.905119
YHR143W-A	RPC10	TFIID	57.7147	294	-0.747475	0.180032	-0.529455	-0.0891987
YIL078W	THS1	TFIID	57.6492	295	-1.25612	0.0758615	-0.896075	-0.637259
YKL040C	NFU1	CR	57.5807	296	-1.14009	-0.177815	-1.40256	-0.981151
YKL180W	RPL17A	TFIID	57.4705	297	-1.43805	-0.0956527	-0.852967	-0.239181
YGL058W	RAD6	TFIID	57.4176	298	-1.59077	-0.104896	-1.43343	-0.772576
YJL111W	CCT7	TFIID	57.2322	299	-1.56083	-0.0217908	-1.29994	-0.683806
YGR086C	PIL1	CR	57.2141	300	-3.29839	-0.728915	-1.70338	-0.982514
YMR108W	ILV2	TFIID	57.1736	301	-0.226856	0.0756727	-0.343612	-0.467952
YPR102C	RPL11A	TFIID	56.9375	302	-1.24775	-0.126991	-1.21696	-0.346901
YDL014W	NOP1	TFIID	56.828	303	-0.899725	0.00469173	-0.998852	-0.471373
YHR027C	RPN1	TFIID	56.8239	304	-1.64834	-0.120687	-1.37059	-0.910545
YOR312C	RPL20B	TFIID	56.4728	305	-1.34577	-0.119182	-0.949242	-0.405754
YOR261C	RPN8	TFIID	56.4508	306	-1.47901	-0.0733226	-1.54869	-0.822905
YIL075C	RPN2	TFIID	56.4332	307	-1.71523	-0.198557	-1.59573	-0.854266
YLR388W	RPS29A	TFIID	56.4191	308	-1.15254	-0.320171	-0.992365	-0.277152
YLR342W	FKS1	CR	56.4039	309	-1.53151	-0.199583	-1.13273	-0.51504
YPL145C	KES1	TFIID	56.3053	310	-1.7231	-0.072977	-1.42652	-0.985954
YGL147C	RPL9A	TFIID	56.2091	311	-1.15034	0.0322073	-0.705149	0.150047
YDR427W	RPN9	TFIID	56.1571	312	-1.50945	-0.171164	-1.65465	-0.689535
YCL031C	RRP7	TFIID	56.065	313	-1.25211	0.110383	-0.899469	-0.569594
YMR205C	PFK2	CR	56.0156	314	-1.96493	-0.357002	-1.0066	-0.702718
YOR276W	CAF20	TFIID	55.7595	315	-1.59262	-0.120255	-1.39091	-0.667547
YNR051C	BRE5	TFIID	55.5833	316	-1.78024	0.0174947	-1.34609	-0.68966
YDL185W	VMA1	TFIID	55.5795	317	-1.74419	-0.117284	-1.70774	-1.18341
YIL142W	CCT2	TFIID	55.4375	318	-1.33933	-0.076853	-1.43674	-0.828161
YFR033C	QCR6	CR	55.253	319	-1.65596	0.0336805	-1.40046	-0.555973
YGL030W	RPL30	TFIID	55.2262	320	-0.678636	-0.0179731	0.0047715	-0.0208031
YMR012W	CLU1	TFIID	55.0931	321	-1.86874	-0.0121847	-1.31404	-0.75416
YPR108W	RPN7	TFIID	55.0842	322	-1.64371	-0.0646611	-1.61296	-0.904119
YBR067C	TIP1	TFIID	54.9583	323	-1.51637	0.199667	-2.1088	-0.293572
YBR158W	AMN1	CR	54.9425	324	-2.89867	-0.752401	-2.12683	-0.307923
YBL028C	YBL028C	TFIID	54.8692	325	-1.02241	-0.175202	-1.0278	-0.229634
YDL208W	NHP2	TFIID	54.817	326	-1.32738	0.0248545	-1.31605	-0.588949
YER102W	RPS8B	TFIID	54.7497	327	-1.18688	-0.119519	-0.733075	-0.075633
YKL156W	RPS27A	TFIID	54.6348	328	-0.854982	-0.0600213	-0.689697	-0.232811
YPL274W	SAM3	CR	54.3645	329	-1.68832	-0.802379	-0.116318	-0.199724
YNL180C	RHO5	CR	54.242	330	-2.93655	-0.540321	-2.16655	-1.15885
YOR122C	PFY1	TFIID	54.162	331	-1.10209	0.0963106	-1.18896	-0.917142
YPL004C	LSP1	CR	54.0507	332	-3.59216	-0.900196	-3.05564	-1.56695
YOR310C	NOP58	TFIID	54.0108	333	-1.00832	0.089622	-1.02819	-0.56138
YDL130W	RPP1B	TFIID	53.9348	334	-1.40864	-0.150442	-1.15827	-0.3789
YMR122W-A	YMR122W-A	CR	53.7857	335	-2.93406	-1.87105	-2.5468	-0.34825
YOR303W	CPA1	CR	53.727	336	-0.94293	-0.749271	0.981039	-0.59914
YOR270C	VPH1	TFIID	53.7125	337	-1.69824	-0.034665	-1.33643	-1.01928
YGL215W	CLG1	TFIID	53.5786	338	-1.10055	0.000983912	-1.27836	-1.10988
YGL105W	ARC1	TFIID	53.5772	339	-1.67629	0.0766339	-1.58952	-0.846025
YLR421C	RPN13	TFIID	53.5569	340	-1.4659	0.0401898	-1.3112	-0.790565
YDR233C	RTN1	TFIID	53.2548	341	-1.26609	0.0219484	-0.857747	-0.584555
YDR054C	CDC34	TFIID	53.2159	342	-1.51688	-0.302214	-1.83951	-1.07902
YPR074C	TKL1	TFIID	52.9412	343	-0.87225	-0.0884491	-1.22486	-0.38283
YKL071W	YKL071W	CR	52.8432	344	-2.59984	-1.15959	-1.35293	-0.809306
YDR023W	SES1	TFIID	52.8357	345	-1.44469	0.0399608	-1.3852	-0.669388
YER064C	VHR2	CR	52.7558	346	-2.02673	-0.733505	-0.0344699	-0.480409
YKR076W	ECM4	CR	52.6774	347	-2.52451	-0.640983	-2.1228	-2.41595
YML026C	RPS18B	TFIID	52.5782	348	-0.960097	-0.119207	-0.581565	-0.28269
YCR093W	CDC39	TFIID	52.3866	349	-1.90108	-0.0127127	-1.23262	-0.860614
YHR007C	ERG11	CR	52.3493	350	-1.93443	-0.778714	-0.42716	-0.227671
YLR390W-A	CCW14	CR	52.3341	351	-1.42064	-0.201448	-1.43042	-0.911325
YPL226W	NEW1	TFIID	52.1199	352	-1.29545	-0.0827538	-1.33663	-0.658643
YJR094W-A	RPL43B	TFIID	51.9995	353	-0.650372	0.0436897	-0.452281	-0.306275
YDL074C	BRE1	TFIID	51.9165	354	-1.7218	0.081461	-1.28664	-0.70298
YER026C	CHO1	CR	51.8778	355	-3.46482	-0.619093	-2.32661	-1.15025
YPL239W	YAR1	TFIID	51.8506	356	-1.3414	0.0863349	-0.855714	-0.111778
YLR354C	TAL1	CR	51.8074	357	-1.41481	-0.451562	-1.43569	-0.963065
YDL137W	ARF2	TFIID	51.756	358	-1.79899	-0.408265	-1.29217	-1.25897
YJR121W	ATP2	CR	51.7113	359	-1.35728	-0.00788478	-1.45537	-1.34693
YDR487C	RIB3	CR	51.6461	360	-1.92666	-0.773898	-0.91642	-0.987609
YDL082W	RPL13A	TFIID	51.5432	361	-1.2323	-0.0576958	-1.03826	-0.455417
YML126C	ERG13	TFIID	51.5379	362	-1.13443	-0.271363	-1.62231	-0.68431
YDR046C	BAP3	CR	51.5192	363	-2.18606	-0.714795	0.125512	-0.666584
YPL154C	PEP4	CR	51.51	364	-2.38821	-0.472571	-2.13901	-1.55059
YPR041W	TIF5	TFIID	51.4611	365	-1.20434	-0.0554143	-1.10121	-0.434339
YOR293W	RPS10A	TFIID	51.1902	366	-1.13375	-0.162495	-0.848454	-0.465338
YDR060W	MAK21	TFIID	51.1829	367	-1.12273	0.157835	-0.905423	-0.288935
YGR162W	TIF4631	TFIID	50.8784	368	-1.24078	-0.0791497	-1.29467	-0.631797
YPL160W	CDC60	TFIID	50.8539	369	-0.946868	0.0894759	-0.879469	-0.566427
YDR003W-A	YDR003W-A	TFIID	50.8418	370	-2.01616	-0.476412	-1.8256	-0.790329
YMR142C	RPL13B	TFIID	50.814	371	-1.34781	-0.0442292	-0.816187	-0.26856
YDR064W	RPS13	TFIID	50.4553	372	-0.338112	-0.0127786	-0.609346	-0.218747
YOR151C	RPB2	TFIID	50.3984	373	-1.58486	-0.00369048	-1.34369	-0.807505
YPL093W	NOG1	TFIID	50.3614	374	-0.849778	0.151137	-0.736704	-0.343571
YKL009W	MRT4	TFIID	50.1499	375	-0.528296	0.16402	-0.851851	-0.280241
YMR177W	MMT1	CR	49.8272	376	-1.39045	-0.648082	-1.09402	-0.577647
YGR037C	ACB1	TFIID	49.8241	377	-0.73332	-0.2583	-1.45875	-0.536722
YCL037C	SRO9	TFIID	49.7954	378	-1.07789	0.218737	-0.829391	-0.667457
YLR009W	RLP24	TFIID	49.7326	379	-0.791822	0.148361	-0.993622	-0.240633
YGR285C	ZUO1	TFIID	49.7292	380	-1.40644	0.142898	-1.32308	-0.639737
YKL122C	SRP21	TFIID	49.7176	381	-1.41535	0.17552	-0.910835	-0.457298
YOR341W	RPA190	TFIID	49.5907	382	-1.01505	0.0850781	-1.1967	-0.393602
YOL058W	ARG1	CR	49.5449	383	-0.745372	0.137321	1.71371	-0.895924
YFR032C-A	RPL29	TFIID	49.5169	384	-0.85025	-0.0390732	-0.717887	-0.113669
YCR031C	RPS14A	TFIID	49.3953	385	-1.27992	0.0283583	-1.15982	-0.438537
YIL069C	RPS24B	TFIID	49.3906	386	-1.12573	-0.125026	-0.629709	-0.318504
YNL016W	PUB1	TFIID	49.3466	387	-1.62637	-0.0975447	-1.41646	-0.85921
YDR172W	SUP35	TFIID	49.2531	388	-1.35247	0.156297	-1.30312	-0.814879
YKL196C	YKT6	TFIID	48.968	389	-1.31448	-0.01486	-1.15754	-0.575687
YNL154C	YCK2	TFIID	48.9328	390	-1.81291	-0.111763	-1.4493	-0.792041
YMR242C	RPL20A	TFIID	48.857	391	-1.35499	-0.184729	-1.08505	-0.394176
YJR088C	EMC2	TFIID	48.796	392	-1.67953	-0.00769007	-1.12901	-0.59976
YKL001C	MET14	TFIID	48.724	393	1.52079	-0.257139	-0.659537	0.183988
YGR253C	PUP2	TFIID	48.7196	394	-1.49636	-0.117277	-1.83497	-0.809443
YOR254C	SEC63	TFIID	48.7118	395	-1.6621	0.100334	-1.0511	-0.786098
YBR106W	PHO88	TFIID	48.5617	396	-0.655089	-0.151625	-1.41248	-0.541636
YDL097C	RPN6	TFIID	48.5028	397	-1.92582	-0.186226	-1.72848	-0.873264
YLR040C	AFB1	CR	48.4895	398	-1.51625	-0.312629	-7.55516	-0.278827
YBR283C	SSH1	TFIID	48.4147	399	-1.7151	0.0335094	-1.31295	-0.823061
YGR218W	CRM1	TFIID	48.1868	400	-1.73391	0.0279513	-1.30433	-0.845655
YNL260C	LTO1	CR	48.1825	401	-1.30034	-0.518899	-1.71595	-0.949838
YMR072W	ABF2	TFIID	48.029	402	-1.58916	-0.17329	-1.41533	-0.902069
YKL013C	ARC19	TFIID	47.9349	403	-1.84424	0.0454828	-1.8293	-1.01452
YGL206C	CHC1	TFIID	47.8777	404	-2.25332	-0.0482705	-1.69835	-1.01739
YOR232W	MGE1	TFIID	47.8666	405	-1.40453	0.13726	-1.45099	-0.903019
YBL027W	RPL19B	TFIID	47.8081	406	-1.09746	-0.0593056	-1.04631	-0.383764
YPL243W	SRP68	TFIID	47.7409	407	-1.36096	0.148918	-1.24702	-0.600221
YER055C	HIS1	CR	47.7344	408	-0.793187	0.353059	-0.307035	-0.788201
YKR094C	RPL40B	TFIID	47.6851	409	-1.21894	-0.159701	-0.781392	-0.318321
YER072W	VTC1	CR	47.5336	410	-2.33604	-0.10067	-3.54894	-0.929736
YMR039C	SUB1	TFIID	47.5081	411	-1.19599	-0.13343	-1.53366	-0.812949
YNR016C	ACC1	CR	47.3576	412	-2.91014	-0.366864	-1.78759	-0.739933
YDL070W	BDF2	CR	47.1426	413	-3.17064	-1.0271	-0.924281	-0.150873
YOR206W	NOC2	TFIID	46.9829	414	-1.17908	0.109612	-1.15333	-0.536133
YBR127C	VMA2	TFIID	46.8911	415	-1.70107	-0.0122494	-1.58881	-1.10638
YFR004W	RPN11	TFIID	46.8089	416	-1.62468	0.0664504	-1.35211	-0.740962
YGL037C	PNC1	CR	46.5997	417	-4.78158	-1.1202	-4.2245	-1.8878
YLR347C	KAP95	TFIID	46.5735	418	-1.90214	-0.237778	-1.72092	-0.923898
YJL127C-B	YJL127C-B	TFIID	46.3292	419	-1.26037	0.142537	-2.20079	-0.710015
YFL045C	SEC53	TFIID	46.1802	420	-1.46657	-0.141833	-1.29103	-0.456224
YPR110C	RPC40	TFIID	46.1764	421	-1.00995	0.167355	-1.00857	-0.422496
YDL160C	DHH1	TFIID	45.9542	422	-1.90189	0.00178077	-1.37097	-0.861118
YIL133C	RPL16A	TFIID	45.9154	423	-1.04374	-0.168752	-0.801829	-0.300138
YML073C	RPL6A	TFIID	45.8798	424	-1.47269	-0.14276	-0.952167	-0.19031
YER122C	GLO3	TFIID	45.752	425	-1.61126	0.0812122	-1.42118	-0.749942
YDR496C	PUF6	TFIID	45.7174	426	-0.778943	0.270453	-0.755938	-0.217363
YNL087W	TCB2	CR	45.7123	427	-2.0495	-0.958786	-1.27246	-0.662158
YLR060W	FRS1	TFIID	45.6886	428	-1.57673	0.0806121	-1.41118	-0.776239
YKL039W	PTM1	CR	45.6497	429	-1.72255	-0.300585	-1.64248	-0.984188
YHR052W	CIC1	TFIID	45.5409	430	-0.957119	0.150632	-0.772769	-0.33991
YCR053W	THR4	TFIID	45.4498	431	-1.14856	0.268873	-0.762479	-0.803487
YMR002W	MIX17	CR	45.3838	432	-1.27602	-0.113616	-1.56465	-0.910619
YER070W	RNR1	CR	45.3652	433	-2.6772	-1.15546	-1.26901	-0.505679
YPL220W	RPL1A	TFIID	45.2484	434	-1.10737	0.0259765	-0.945022	-0.683187
YGL207W	SPT16	TFIID	45.1878	435	-1.59378	-0.00194868	-0.953927	-0.643742
YER073W	ALD5	CR	45.0973	436	-0.836655	-0.710796	-0.821676	-0.460558
YOR335C	ALA1	TFIID	44.9894	437	-1.28566	-0.084762	-1.04155	-0.706269
YFL031W	HAC1	CR	44.9817	438	-1.10729	-0.0612194	-1.28914	-1.20695
YCR009C	RVS161	TFIID	44.942	439	-1.89239	-0.190779	-1.86475	-0.995147
YLL050C	COF1	TFIID	44.8905	440	-1.59669	-0.167808	-1.32359	-0.886444
YBL056W	PTC3	TFIID	44.8056	441	-1.95804	-0.00243254	-1.56214	-1.07339
YNL190W	YNL190W	CR	44.6982	442	-1.57281	-0.342728	-1.3349	-0.634632
YNL229C	URE2	TFIID	44.6608	443	-1.03321	0.0130927	-0.96422	-0.597202
YPR187W	RPO26	TFIID	44.5952	444	-1.32633	0.0899735	-1.31668	-0.611014
YLR448W	RPL6B	TFIID	44.5317	445	-1.37846	-0.146155	-0.83897	-0.451538
YIL051C	MMF1	CR	44.5301	446	-2.08934	-0.695016	-1.7312	-1.3126
YJR105W	ADO1	TFIID	44.5032	447	-1.25486	0.274296	-1.97382	-1.14731
YER133W	GLC7	TFIID	44.2916	448	-1.80202	-0.244187	-1.52679	-1.01234
YGL103W	RPL28	TFIID	44.1795	449	-0.407151	0.0199625	-0.617216	-0.392768
YNL308C	KRI1	TFIID	44.1305	450	-0.893195	0.303984	-0.898886	-0.194201
YLR061W	RPL22A	TFIID	44.0933	451	-0.965028	-0.0696541	-0.764829	-0.25931
YNL153C	GIM3	TFIID	44.0644	452	-1.3507	0.0984372	-1.34115	-0.714288
YMR308C	PSE1	TFIID	44.031	453	-1.42859	0.220916	-1.08737	-0.51169
YPL210C	SRP72	TFIID	44.0176	454	-1.62987	0.155243	-1.18962	-0.644363
YDR429C	TIF35	TFIID	43.9886	455	-1.36493	0.136679	-1.35766	-0.694057
YDR447C	RPS17B	TFIID	43.9235	456	-0.997502	-0.18921	-0.39504	-0.149892
YOR361C	PRT1	TFIID	43.8914	457	-1.25129	0.121491	-1.11733	-0.709601
YNL110C	NOP15	TFIID	43.8848	458	-0.964661	0.294222	-0.845454	-0.483037
YDR341C	YDR341C	TFIID	43.8817	459	-0.86383	0.0647183	-0.875128	-0.651286
YGR279C	SCW4	CR	43.8233	460	-1.58622	-0.429536	-1.64602	-0.926116
YKL117W	SBA1	TFIID	43.7536	461	-1.76847	-0.0834268	-2.08095	-1.05936
YHR064C	SSZ1	TFIID	43.7499	462	-1.27882	0.113533	-1.29664	-0.63314
YOR355W	GDS1	TFIID	43.736	463	-0.683241	0.529032	0.116707	-0.182737
YBR121C	GRS1	TFIID	43.6293	464	-1.39439	0.203077	-1.25339	-0.66629
YNL189W	SRP1	TFIID	43.5531	465	-1.46013	0.0674326	-1.20163	-0.774905
YDR368W	YPR1	TFIID	43.4924	466	-1.95316	-0.47086	-1.81934	-1.04734
YNL241C	ZWF1	CR	43.4656	467	-2.16196	-1.20309	-1.74041	-0.818463
YOL121C	RPS19A	TFIID	43.4644	468	-1.05786	-0.0792877	-0.945956	-0.432655
YKL103C	APE1	CR	43.4597	469	-2.76594	-0.966957	-2.65633	-2.37237
YLR287C-A	RPS30A	CR	43.3456	470	-1.14214	-0.213082	-1.0057	-0.369311
YNL096C	RPS7B	TFIID	43.3336	471	-1.41446	-0.174601	-0.924752	-0.37382
YHL034C	SBP1	TFIID	43.3237	472	-1.86482	0.0773289	-1.67803	-1.05076
YLR455W	PDP3	TFIID	43.2077	473	-1.75636	-0.160884	-1.15308	-0.80073
YNL070W	TOM7	TFIID	43.1363	474	-1.37073	0.285628	-0.849769	-0.720714
YIL148W	RPL40A	TFIID	43.1052	475	-1.24755	-0.0990738	-1.18564	-0.418697
YER009W	NTF2	TFIID	43.0926	476	-1.32005	-0.0586266	-1.36765	-0.636585
YJR122W	IBA57	TFIID	43.0872	477	-1.38111	-0.309776	-0.943011	-1.10926
YHR183W	GND1	CR	43.0061	478	-1.92991	-0.337739	-1.72473	-0.574455
YNL104C	LEU4	CR	42.939	479	-0.286826	-0.125191	-0.0443958	-0.782666
YGR094W	VAS1	TFIID	42.9053	480	-1.18807	0.10393	-0.999944	-0.803928
YDR158W	HOM2	CR	42.7941	481	-0.240152	0.0124819	-0.713483	-0.85204
YPL260W	YPL260W	TFIID	42.7894	482	-2.01742	0.018986	-1.53053	-0.936386
YAL025C	MAK16	TFIID	42.7824	483	-0.832026	0.287948	-0.945032	-0.158588
YDR238C	SEC26	TFIID	42.7779	484	-1.85743	0.0765236	-1.22657	-0.78754
YPR024W	YME1	TFIID	42.6131	485	-1.73317	-0.241268	-1.32253	-0.983163
YPR181C	SEC23	TFIID	42.4707	486	-1.65283	-0.00586424	-1.4207	-1.08878
YNL118C	DCP2	TFIID	42.4497	487	-1.79397	-0.0725175	-1.38294	-0.882713
YKR008W	RSC4	TFIID	42.4408	488	-2.04393	-0.075916	-1.18212	-0.5935
YER090W	TRP2	TFIID	42.403	489	-1.11931	-0.062776	-0.7466	-0.911362
YOR117W	RPT5	TFIID	42.383	490	-1.42728	0.0183101	-1.62356	-0.820381
YGR034W	RPL26B	TFIID	42.3781	491	-1.03245	-0.0920125	-0.228305	-0.127892
YNL212W	VID27	TFIID	42.3497	492	-1.89578	-0.505653	-1.16889	-1.01307
YMR229C	RRP5	TFIID	42.3195	493	-1.1968	0.265072	-0.957381	-0.343745
YAL016W	TPD3	TFIID	42.2778	494	-1.86072	0.00404233	-1.41632	-1.10978
YMR161W	HLJ1	TFIID	42.2408	495	-1.60637	0.142511	-1.0559	-0.612019
YFR052W	RPN12	TFIID	42.2014	496	-1.74396	-0.209898	-1.8792	-0.877738
YNL066W	SUN4	CR	42.1381	497	-2.41642	-0.765849	-1.83224	-0.719245
YFL016C	MDJ1	TFIID	42.0716	498	-2.27882	0.164498	-1.78206	-0.877996
YNL113W	RPC19	TFIID	42.0443	499	-0.684325	0.178976	-0.772894	-0.483942
YOR168W	GLN4	TFIID	41.9934	500	-1.13435	0.192367	-1.22901	-0.568733
YPL204W	HRR25	TFIID	41.8923	501	-1.49238	0.0275049	-1.52346	-0.88284
YGL190C	CDC55	TFIID	41.7294	502	-1.82119	0.17758	-1.22523	-0.867379
YOR370C	MRS6	TFIID	41.7121	503	-1.29459	0.090355	-1.14487	-0.694327
YDR151C	CTH1	TFIID	41.7029	504	-1.72496	0.418362	-1.75558	-0.809553
YKR057W	RPS21A	TFIID	41.443	505	-0.898033	0.0344554	-0.786072	-0.377292
YER087C-B	SBH1	TFIID	41.4188	506	-1.91883	-0.089086	-0.968739	-0.600851
YDR035W	ARO3	TFIID	41.2765	507	-0.661574	0.0627504	0.29892	-1.05659
YOR267C	HRK1	TFIID	41.2199	508	-2.06492	-0.17056	-1.89732	-1.11494
YLR413W	INA1	CR	41.2085	509	-2.79036	-1.43488	-0.598717	-0.300093
YBL072C	RPS8A	TFIID	41.1978	510	-1.3752	-0.0936471	-1.27221	-0.603273
YEL065W	SIT1	CR	41.1725	511	-1.3435	-1.16455	-0.334747	-1.3247
YBR154C	RPB5	TFIID	41.0506	512	-1.08469	0.170456	-1.5768	-0.687955
YGR116W	SPT6	TFIID	41.023	513	-1.88551	0.203774	-1.2927	-0.78441
YOL136C	PFK27	CR	41.0205	514	-1.63847	-0.612418	-1.80007	-0.522556
YPL078C	ATP4	TFIID	41.0152	515	-1.70061	-0.011865	-1.16693	-0.681507
YJL109C	UTP10	TFIID	41.0091	516	-0.95976	-0.0169686	-0.927464	-0.342158
YMR235C	RNA1	TFIID	40.9658	517	-1.49599	0.163144	-1.30615	-0.611724
YDR091C	RLI1	TFIID	40.9523	518	-1.16427	0.138438	-1.15089	-0.676602
YBL099W	ATP1	TFIID	40.8519	519	-1.6282	0.0485594	-1.38107	-1.08708
YPR036W	VMA13	TFIID	40.8176	520	-1.70852	-0.111438	-1.73912	-1.37872
YOL154W	ZPS1	CR	40.8103	521	-3.58741	-1.44511	-0.949217	-3.00934
YLR051C	FCF2	TFIID	40.7472	522	-0.819816	0.231939	-0.924532	-0.378595
YNL002C	RLP7	TFIID	40.7342	523	-0.798745	0.0748583	-0.663527	-0.0913964
YKR095W	MLP1	TFIID	40.6997	524	-1.78577	0.124906	-1.20417	-0.649017
YBR034C	HMT1	TFIID	40.6048	525	-0.876951	0.0760385	-1.46634	-0.539401
YDL140C	RPO21	TFIID	40.5178	526	-1.65627	-0.008904	-1.49541	-1.04468
YDR394W	RPT3	TFIID	40.4267	527	-1.60875	-0.0911279	-1.32922	-0.72232
YPL117C	IDI1	TFIID	40.3178	528	-1.10421	-0.311453	-1.46799	-0.428518
YGR135W	PRE9	TFIID	40.3106	529	-1.45744	-0.0360978	-1.69637	-0.86948
YNL085W	MKT1	TFIID	40.2837	530	-1.64779	0.0886899	-1.20633	-0.656518
YLR064W	PER33	CR	40.2757	531	-1.7128	-0.280872	-2.41047	-0.690528
YML012W	ERV25	TFIID	40.2596	532	-1.74174	0.13287	-1.13907	-0.879559
YBL041W	PRE7	TFIID	40.1567	533	-1.25592	-0.0769308	-1.7599	-0.82102
YKL210W	UBA1	TFIID	40.1471	534	-1.86866	-0.0173985	-1.3471	-0.829153
YGL011C	SCL1	TFIID	40.0545	535	-1.56698	-0.0738567	-1.68997	-0.837526
YDR471W	RPL27B	TFIID	40.005	536	-1.04151	-0.144084	-0.888237	-0.404846
YGR124W	ASN2	TFIID	39.9751	537	-0.776593	0.0972983	-0.94294	-0.955296
YOR332W	VMA4	TFIID	39.9429	538	-1.69393	-0.0358286	-1.61882	-0.939791
YER002W	NOP16	TFIID	39.8137	539	-0.852794	0.247761	-0.918623	-0.125495
YJL189W	RPL39	TFIID	39.8013	540	-0.694529	-0.0608557	-0.548691	-0.381902
YKL178C	STE3	CR	39.7304	541	-1.69333	-0.647276	-6.21051	0.0301586
YFL004W	VTC2	CR	39.596	542	-3.19089	0.000877439	-3.04438	-1.10993
YDL145C	COP1	TFIID	39.5844	543	-1.74381	0.0714487	-1.37158	-0.85343
YGL195W	GCN1	TFIID	39.5406	544	-1.54208	0.245252	-1.33046	-0.655474
YJL052W	TDH1	CR	39.5133	545	-5.81657	-3.00878	-4.72835	-3.23921
YMR143W	RPS16A	TFIID	39.4588	546	-1.16876	-0.128414	-0.910131	-0.485315
YML007W	YAP1	CR	39.4564	547	-1.19572	-0.10305	-1.25142	-0.637873
YDR077W	SED1	CR	39.419	548	-2.10433	-0.705002	-1.35082	-1.00273
YMR079W	SEC14	TFIID	39.2031	549	-1.55958	0.0284291	-1.19102	-0.599387
YDR270W	CCC2	CR	39.1586	550	-1.61698	-0.768673	-0.735345	-1.36539
YJR063W	RPA12	TFIID	39.1448	551	-0.857334	0.102058	-0.986979	-0.337086
YDR214W	AHA1	CR	39.1003	552	-2.37405	0.108222	-1.66116	-0.795207
YPR103W	PRE2	TFIID	39.0725	553	-1.58386	-0.126734	-1.68033	-0.957006
YDR365C	ESF1	TFIID	39.0676	554	-0.759306	0.209308	-0.898489	-0.110517
YCL043C	PDI1	CR	39.0158	555	-2.08059	-0.377485	-2.01194	-1.08384
YOL120C	RPL18A	TFIID	39.0024	556	-0.998231	0.00355564	-0.972739	-0.583179
YGL173C	XRN1	TFIID	38.8726	557	-1.98255	0.0563305	-1.33157	-0.749712
YGL122C	NAB2	TFIID	38.7672	558	-1.78938	-0.257782	-1.66412	-0.857076
YDL235C	YPD1	TFIID	38.6207	559	-1.58992	0.0481377	-1.35701	-0.584695
YDL075W	RPL31A	TFIID	38.6087	560	-1.27784	-0.0416693	-0.765467	-0.336178
YLR276C	DBP9	TFIID	38.578	561	-0.807146	0.246396	-0.650481	-0.168267
YER012W	PRE1	TFIID	38.5774	562	-1.68241	-0.172115	-1.57263	-0.798698
YPL212C	PUS1	TFIID	38.5522	563	-0.882519	0.0580059	-0.693073	-0.507159
YKL184W	SPE1	TFIID	38.5503	564	-1.0986	-0.194473	-1.55029	-0.903939
YMR230W	RPS10B	TFIID	38.5223	565	-1.14454	-0.0821965	-1.02339	-0.338546
YDL029W	ARP2	CR	38.4727	566	-2.17343	-0.114079	-1.46724	-0.984339
YLR447C	VMA6	TFIID	38.4096	567	-1.60843	0.0761762	-1.02342	-0.739075
YNL024C-A	KSH1	TFIID	38.4002	568	-0.780717	0.136233	-0.830367	-0.552804
YJR117W	STE24	TFIID	38.134	569	-1.82799	0.0517015	-1.57012	-0.641593
YPL249C-A	RPL36B	TFIID	38.126	570	-1.15396	-0.0602958	-1.38874	-0.503025
YKL057C	NUP120	TFIID	38.1123	571	-1.77336	-0.0709727	-0.931956	-0.746652
YLR257W	YLR257W	TFIID	38.0754	572	-1.78814	-0.146099	-2.73647	-1.29112
YOR039W	CKB2	TFIID	38.0654	573	-1.68113	-0.0160453	-1.40715	-0.849837
YDR346C	SVF1	TFIID	38.0566	574	-1.14252	-0.102116	-0.926378	-0.405566
YPL043W	NOP4	TFIID	38.0329	575	-0.937415	0.290034	-0.891222	-0.235255
YOR360C	PDE2	TFIID	38.027	576	-0.820059	0.0949575	-0.996881	-0.67828
YGL029W	CGR1	TFIID	38.0171	577	-1.07167	0.114044	-1.42533	-0.265339
YFR040W	SAP155	TFIID	38.0161	578	-1.81527	-0.0150422	-1.42647	-0.832375
YNL248C	RPA49	TFIID	37.9819	579	-0.832933	0.178048	-0.956912	-0.383502
YDL007W	RPT2	TFIID	37.9744	580	-1.6407	0.00382566	-1.36474	-0.657363
YML024W	RPS17A	TFIID	37.9693	581	-1.33597	-0.139051	-1.05121	-0.544149
YOL027C	MDM38	TFIID	37.9097	582	-1.22598	0.225492	-0.809793	-0.618144
YBL024W	NCL1	TFIID	37.8816	583	-1.4736	0.172643	-1.10873	-0.528899
YER103W	SSA4	TFIID	37.8749	584	-2.78699	0.548844	-1.13974	-0.890649
YIL126W	STH1	TFIID	37.8082	585	-2.06226	0.216742	-0.714386	-0.640033
YPL050C	MNN9	TFIID	37.7868	586	-1.56927	0.215814	-1.18532	-0.688746
YOR259C	RPT4	TFIID	37.7834	587	-1.57652	-0.0717967	-1.71765	-1.03595
YDR174W	HMO1	TFIID	37.7757	588	-1.17915	0.233468	-1.03238	-0.439175
YMR188C	MRPS17	TFIID	37.7726	589	-1.56249	0.0850493	-1.16718	-0.575416
YOL145C	CTR9	TFIID	37.7375	590	-1.75407	0.0656827	-1.26253	-0.770488
YDR299W	BFR2	TFIID	37.7155	591	-0.920416	0.277288	-0.7528	0.0333577
YGR020C	VMA7	TFIID	37.6743	592	-1.6293	-0.141965	-1.75678	-0.834923
YPR072W	NOT5	TFIID	37.6621	593	-1.73476	0.074848	-1.23868	-0.668088
YDR212W	TCP1	TFIID	37.6321	594	-1.69231	0.157126	-1.31145	-0.711236
YKL054C	DEF1	CR	37.5941	595	-1.41078	0.195496	-1.25324	-0.632851
YLR292C	SEC72	TFIID	37.5847	596	-1.28847	0.0891799	-1.41458	-0.847538
YPL179W	PPQ1	TFIID	37.5798	597	-1.56034	-0.00524156	-1.16847	-0.942615
YMR217W	GUA1	TFIID	37.5516	598	-0.472769	0.0315642	-1.26285	-0.284633
YIL035C	CKA1	TFIID	37.5053	599	-1.49106	0.0846616	-0.978805	-0.541451
YDR381W	YRA1	CR	37.4927	600	-1.75331	-0.571531	-0.938087	-0.826086
YHR128W	FUR1	CR	37.3832	601	-1.38109	-0.383252	-2.13843	-0.261204
YMR146C	TIF34	TFIID	37.3323	602	-1.59823	0.0860129	-1.30677	-0.678922
YPL190C	NAB3	TFIID	37.3025	603	-1.83458	0.121339	-1.66507	-1.07431
YJL014W	CCT3	TFIID	37.286	604	-1.4164	0.145297	-1.18154	-0.593469
YKR052C	MRS4	CR	37.2854	605	-0.691318	0.324786	-1.1328	-1.36726
YML103C	NUP188	TFIID	37.2502	606	-1.73656	0.0373929	-1.1402	-0.656159
YPR143W	RRP15	TFIID	37.214	607	-1.22022	0.0424576	-1.10003	-0.284203
YMR246W	FAA4	CR	37.1592	608	-2.05443	-1.17046	-0.606967	-0.452413
YNL197C	WHI3	TFIID	37.0655	609	-2.00095	-0.073191	-1.27309	-0.967811
YKL035W	UGP1	CR	37.0299	610	-2.50298	-0.134926	-2.34878	-1.53232
YPL202C	AFT2	CR	37.0109	611	-1.31429	-0.278133	-1.0519	-0.583715
YOR089C	VPS21	TFIID	36.9531	612	-1.41837	0.0527582	-1.21097	-0.621126
YOL077C	BRX1	TFIID	36.91	613	-1.06911	0.258468	-0.737744	-0.150293
YBR286W	APE3	CR	36.8851	614	-1.93263	0.0296794	-1.83722	-1.08397
YJL130C	URA2	CR	36.831	615	-1.34944	-0.251767	0.0668884	-0.439158
YGR103W	NOP7	TFIID	36.8217	616	-0.954082	0.176509	-0.692733	-0.169797
YER126C	NSA2	TFIID	36.7796	617	-0.423297	0.258188	-0.698405	-0.244501
YDR450W	RPS18A	TFIID	36.648	618	-1.00169	-0.016272	-1.02645	-0.464759
YMR183C	SSO2	TFIID	36.6303	619	-1.75298	-0.100397	-1.17342	-0.809459
YKR014C	YPT52	TFIID	36.6249	620	-1.35989	0.383432	-1.19527	-0.788909
YHR196W	UTP9	TFIID	36.5471	621	-0.871728	0.236347	-0.51976	0.0242213
YGR229C	SMI1	TFIID	36.4973	622	-1.28975	-0.0379421	-1.34681	-0.677826
YOL049W	GSH2	TFIID	36.4297	623	-1.55757	-0.00350041	-1.22624	-0.99123
YML074C	FPR3	TFIID	36.4205	624	-1.62227	0.0875032	-1.72312	-0.755143
YIL118W	RHO3	TFIID	36.3705	625	-1.50907	0.0797764	-1.18951	-0.60879
YMR131C	RRB1	TFIID	36.3257	626	-0.620166	0.167847	-0.896689	-0.285266
YNL061W	NOP2	TFIID	36.3115	627	-0.907188	0.182154	-0.987914	-0.393323
YBR177C	EHT1	CR	36.2995	628	-3.23611	-0.230842	-2.37486	-1.34099
YJL002C	OST1	TFIID	36.243	629	-1.68848	0.0165699	-1.19225	-0.781723
YDR377W	ATP17	TFIID	36.2105	630	-1.18432	0.224135	-1.19861	-0.806198
YFL037W	TUB2	TFIID	36.2046	631	-2.03671	-0.0553136	-1.0858	-0.781285
YPL171C	OYE3	CR	36.1209	632	-2.45722	-1.48187	-1.2731	-1.89766
YGL238W	CSE1	TFIID	36.0937	633	-1.64135	0.0654824	-1.1788	-0.762758
YPL178W	CBC2	TFIID	36.0907	634	-1.71836	0.137336	-1.50432	-0.700224
YDL148C	NOP14	TFIID	36.0258	635	-0.961276	0.306067	-0.97057	-0.149242
YIL038C	NOT3	TFIID	35.9454	636	-1.67263	0.146522	-1.16496	-0.635735
YJL008C	CCT8	TFIID	35.9373	637	-1.44431	0.0509361	-1.2485	-0.699352
YOR043W	WHI2	TFIID	35.8971	638	-1.48712	-0.113448	-1.48018	-0.845725
YHR094C	HXT1	CR	35.8911	639	-1.80967	-1.87739	-0.0811717	0.426272
YGR185C	TYS1	TFIID	35.88	640	-1.33846	0.090901	-1.1866	-0.752843
YDR190C	RVB1	TFIID	35.8625	641	-1.50965	0.176941	-1.30658	-0.65033
YML022W	APT1	TFIID	35.8359	642	-0.164808	0.319954	-1.03305	-0.441467
YJL177W	RPL17B	TFIID	35.8141	643	-1.03392	-0.14682	-0.797002	-0.150141
YHR141C	RPL42B	TFIID	35.7803	644	-1.16255	-0.194767	-0.963249	-0.472351
YBR084C-A	RPL19A	TFIID	35.7702	645	-1.21197	-0.206091	-0.827178	-0.361947
YBL022C	PIM1	TFIID	35.7665	646	-1.7817	-0.113017	-1.74524	-0.82767
YDR508C	GNP1	CR	35.7655	647	-1.57725	-0.818619	-0.615904	-0.52186
YGR017W	YGR017W	TFIID	35.748	648	-1.38872	0.063582	-0.997542	-0.609372
YFR010W	UBP6	TFIID	35.7217	649	-1.7826	0.0818998	-1.72538	-0.860344
YDR264C	AKR1	TFIID	35.7139	650	-0.965452	-0.258325	-1.0472	-1.15501
YFL038C	YPT1	TFIID	35.7096	651	-1.6449	0.0201202	-1.2983	-0.766067
YGL077C	HNM1	CR	35.6972	652	-3.02739	-0.126548	-2.13226	-1.11475
YHL011C	PRS3	TFIID	35.6898	653	-0.85835	0.207009	-0.96471	-0.358152
YPL273W	SAM4	TFIID	35.6463	654	-0.907803	0.0794778	-0.705793	-0.753807
YKL063C	YKL063C	TFIID	35.58	655	-1.65891	0.0950717	-1.01121	-0.576749
YBR130C	SHE3	TFIID	35.4496	656	-1.8521	-0.0922133	-0.991266	-0.710787
YGR132C	PHB1	TFIID	35.4192	657	-1.40866	0.104154	-1.17931	-0.600929
YHR170W	NMD3	TFIID	35.3701	658	-0.79102	0.121302	-0.68975	-0.0909012
YBR049C	REB1	TFIID	35.3434	659	-2.14356	0.15432	-1.17478	-0.622972
YDR395W	SXM1	TFIID	35.3386	660	-1.26131	0.0856276	-1.17066	-0.569269
YGR090W	UTP22	TFIID	35.3384	661	-1.50804	0.14958	-0.844415	-0.36383
YOR078W	BUD21	TFIID	35.3333	662	-0.958139	0.096549	-0.967422	-0.227429
YER136W	GDI1	TFIID	35.3252	663	-1.61533	-0.0598081	-1.3401	-0.663086
YDL180W	YDL180W	CR	35.314	664	-1.08606	-0.398068	-1.46157	-0.849645
YPR169W	JIP5	TFIID	35.2714	665	-1.11297	0.0603866	-1.15849	-0.458507
YLR033W	RSC58	TFIID	35.2303	666	-1.64085	0.140713	-1.08059	-0.53935
YPR043W	RPL43A	TFIID	35.207	667	-1.21921	-0.106993	-0.988452	-0.381201
YOL041C	NOP12	TFIID	35.1269	668	-1.05027	0.345549	-0.693597	-0.153668
YIL018W	RPL2B	TFIID	35.1124	669	-1.18278	-0.0534331	-1.04305	-0.407134
YMR194W	RPL36A	TFIID	35.0715	670	-1.18167	-0.170562	-1.02542	-0.445222
YKR028W	SAP190	TFIID	34.9907	671	-1.91198	-0.0215666	-1.36823	-0.803139
YDR032C	PST2	CR	34.953	672	-2.17618	-1.03186	-1.73457	-1.54461
YPL118W	MRP51	TFIID	34.9125	673	-1.74167	0.182366	-1.57038	-0.853026
YDL083C	RPS16B	TFIID	34.9115	674	-1.37442	-0.218802	-0.613944	-0.106474
YBR146W	MRPS9	TFIID	34.9018	675	-1.60959	0.118646	-1.50352	-0.76688
YKL028W	TFA1	TFIID	34.8866	676	-1.76855	-0.0246892	-1.30377	-0.790009
YDR028C	REG1	TFIID	34.8834	677	-1.87714	0.114141	-1.40604	-0.837069
YKL006W	RPL14A	TFIID	34.8617	678	-1.06178	-0.112069	-0.761883	-0.365497
YKL179C	COY1	TFIID	34.8113	679	-1.772	0.189776	-0.965129	-0.572915
YGR054W	YGR054W	TFIID	34.8046	680	-1.50261	0.0952445	-1.21373	-0.858106
YJL080C	SCP160	TFIID	34.737	681	-1.74606	0.0933394	-1.32616	-0.646756
YOR290C	SNF2	TFIID	34.7207	682	-2.08794	0.00700655	-1.14562	-0.754148
YER056C	FCY2	CR	34.7145	683	-0.458816	-0.573726	-0.404568	-0.467416
YPL079W	RPL21B	TFIID	34.6079	684	-1.41751	-0.194038	-0.777696	-0.517053
YPL265W	DIP5	CR	34.5541	685	-1.3229	-0.863563	-1.41524	-1.04817
YDL025C	RTK1	CR	34.5226	686	-1.65379	-0.322918	-1.79983	-1.64987
YGL009C	LEU1	TFIID	34.5219	687	0.741298	0.830941	-1.13212	-0.192902
YHR135C	YCK1	TFIID	34.4844	688	-1.79713	-0.0199078	-1.33714	-0.963681
YER074W	RPS24A	TFIID	34.4241	689	-1.14137	-0.080927	-1.04426	-0.474046
YKR081C	RPF2	TFIID	34.3808	690	-0.739759	0.241544	-0.793212	-0.184697
YGR106C	VOA1	TFIID	34.3427	691	-1.31353	-0.055506	-1.39862	-0.86749
YGL245W	GUS1	TFIID	34.3341	692	-1.70607	0.175527	-1.40855	-0.985599
YGR161C	RTS3	CR	34.3305	693	-2.11354	-0.895181	0.887568	-0.87333
YDL125C	HNT1	CR	34.3076	694	-1.89769	-0.508046	-1.58621	-1.05829
YDL122W	UBP1	TFIID	34.1768	695	-1.52172	0.0903483	-1.25594	-0.623287
YJL136C	RPS21B	TFIID	34.1652	696	-1.15977	-0.187213	-0.611005	-0.171083
YKR011C	YKR011C	TFIID	34.1651	697	-2.39798	-0.427607	-1.55915	-1.13519
YDL053C	PBP4	TFIID	34.0768	698	-1.43215	0.349908	-1.0756	-0.723608
YCL054W	SPB1	TFIID	34.0615	699	-1.06464	0.187716	-0.624717	-0.152976
YCL011C	GBP2	TFIID	34.0424	700	-1.62193	0.0823625	-1.05616	-0.692041
YDR127W	ARO1	CR	34.0386	701	-1.01006	0.303468	-0.904281	-0.878471
YIL149C	MLP2	TFIID	34.0225	702	-1.91978	0.108063	-1.485	-0.609399
YFR002W	NIC96	TFIID	34.0142	703	-1.56368	0.208694	-0.973783	-0.54486
YJL133C-A	YJL133C-A	CR	33.9902	704	-3.10855	-1.41072	-0.630037	-0.716536
YPL012W	RRP12	TFIID	33.9872	705	-0.85041	0.268226	-0.657254	-0.177393
YGR146C	ECL1	CR	33.9856	706	-0.608696	-0.426029	-0.177959	0.617936
YPL215W	CBP3	TFIID	33.9138	707	-1.72312	0.0892593	-1.13649	-0.818419
YML009C	MRPL39	TFIID	33.8453	708	-1.7595	0.0592723	-1.52594	-0.757469
YGR128C	UTP8	TFIID	33.845	709	-1.07156	0.236568	-0.63933	-0.0307162
YOL068C	HST1	TFIID	33.836	710	-1.68634	0.0466271	-1.05178	-0.612763
YPR016C	TIF6	TFIID	33.8005	711	-0.936372	0.0590032	-0.961544	-0.687126
YGR231C	PHB2	TFIID	33.7827	712	-1.77928	-0.0413701	-1.21154	-0.73718
YER123W	YCK3	TFIID	33.7598	713	-1.35222	0.308255	-1.25134	-1.01301
YDR226W	ADK1	CR	33.7565	714	-2.17985	-0.5983	-2.35671	-0.603206
YPR010C	RPA135	TFIID	33.7316	715	-0.796997	0.169192	-0.832012	-0.502186
YGR130C	YGR130C	TFIID	33.7308	716	-2.8589	-0.118643	-2.19441	-1.49358
YEL051W	VMA8	TFIID	33.73	717	-1.70525	0.0428528	-1.29292	-0.828378
YCR004C	YCP4	TFIID	33.6739	718	-1.0921	-0.284298	-1.76973	-1.23842
YMR295C	YMR295C	TFIID	33.6104	719	-1.89112	-0.169979	-1.24188	-0.819195
YNL044W	YIP3	TFIID	33.6099	720	-2.44839	-0.367003	-1.56015	-1.0052
YML093W	UTP14	TFIID	33.5975	721	-1.21581	0.265056	-1.0702	-0.293737
YDR152W	GIR2	TFIID	33.595	722	-1.03567	0.0189847	-1.24744	-0.577618
YDR153C	ENT5	TFIID	33.5836	723	-1.39189	0.121362	-1.41706	-0.603799
YLR297W	YLR297W	CR	33.5452	724	-3.49578	-2.84537	-3.10612	-1.07782
YPL146C	NOP53	TFIID	33.5376	725	-1.22269	0.167498	-1.11977	-0.363164
YNL005C	MRP7	TFIID	33.4752	726	-1.22883	0.27717	-1.24452	-0.672656
YPL105C	SYH1	TFIID	33.4724	727	-1.67203	0.103996	-1.18334	-0.83342
YNR021W	YNR021W	TFIID	33.4163	728	-1.68871	0.0544549	-1.29641	-0.762114
YPL019C	VTC3	CR	33.4012	729	-4.95372	-0.0933436	-4.94589	-1.09396
YJR014W	TMA22	TFIID	33.3935	730	-1.41877	-0.160784	-1.27805	-0.453379
YHR005C	GPA1	TFIID	33.3931	731	-1.04464	-0.146397	-3.01089	-0.284806
YBR162W-A	YSY6	TFIID	33.3359	732	-1.61043	0.0124224	-0.763528	-0.615208
YML056C	IMD4	TFIID	33.3303	733	-0.845694	-0.463489	-1.7525	-0.311501
YKL145W	RPT1	TFIID	33.3086	734	-1.73619	-0.202574	-1.57634	-0.807484
YHR203C	RPS4B	TFIID	33.3025	735	-1.16808	-0.0790045	-0.834703	-0.350624
YGL244W	RTF1	TFIID	33.2918	736	-1.67906	0.248388	-1.18812	-0.628474
YDL116W	NUP84	TFIID	33.2713	737	-1.73538	0.143331	-0.878474	-0.575153
YDL143W	CCT4	TFIID	33.2614	738	-1.55867	0.18124	-1.42091	-0.852058
YMR203W	TOM40	TFIID	33.2573	739	-1.87992	0.0674401	-1.50053	-1.01336
YLR310C	CDC25	TFIID	33.2544	740	-1.55306	-0.0561915	-1.07608	-0.810295
YOR008C	SLG1	TFIID	33.2536	741	-2.12331	-0.426271	-1.74932	-1.02142
YKL120W	OAC1	CR	33.224	742	0.0449595	-0.241121	-1.24832	-0.0736396
YDR335W	MSN5	TFIID	33.1971	743	-1.5284	-0.104293	-1.31185	-0.872651
YHR077C	NMD2	TFIID	33.1966	744	-1.46168	0.0823618	-0.920161	-0.581612
YGR267C	FOL2	TFIID	33.1949	745	-0.700547	0.00487467	-0.897359	-0.731773
YEL033W	MTC7	CR	33.1891	746	-1.89066	-0.502904	-1.61143	-0.495957
YPR067W	ISA2	TFIID	33.1595	747	-1.41214	-0.0408568	-1.7108	-1.20802
YBR086C	IST2	TFIID	33.1398	748	-2.44489	-0.288391	-1.58062	-1.00426
YGR175C	ERG1	CR	33.1365	749	-1.93723	-0.606262	-1.42604	-0.446005
YGL043W	DST1	TFIID	33.1121	750	-1.54517	0.129077	-1.04783	-0.554955
YGL078C	DBP3	TFIID	33.0759	751	-0.837937	0.187544	-1.05167	-0.278481
YJL168C	SET2	TFIID	33.0742	752	-2.35419	-0.0122361	-1.23665	-0.874237
YMR037C	MSN2	CR	33.0126	753	-1.7704	-0.259998	-1.42336	-0.967261
YLR221C	RSA3	TFIID	33.0035	754	-1.24399	0.151694	-1.07899	0.00780796
YML038C	YMD8	TFIID	32.9821	755	-1.20101	-0.224808	-0.780739	-0.692353
YOR224C	RPB8	TFIID	32.967	756	-0.901288	0.318566	-1.34227	-0.700639
YNL091W	NST1	TFIID	32.9622	757	-1.84782	0.128275	-1.36368	-0.881866
YGR167W	CLC1	TFIID	32.96	758	-1.97355	0.0928804	-1.41577	-0.94604
YGL188C-A	YGL188C-A	TFIID	32.9193	759	-0.252758	-0.0779766	-0.332575	-0.664251
YFR050C	PRE4	TFIID	32.9117	760	-1.53362	-0.0164363	-1.67376	-0.930491
YKL104C	GFA1	TFIID	32.8834	761	-1.24835	-0.00179252	-0.959821	-0.627662
YDR062W	LCB2	TFIID	32.8682	762	-1.69625	-0.0317525	-1.00788	-0.566155
YOR247W	SRL1	CR	32.8451	763	-1.79369	-0.569298	-1.04055	-0.412479
YML081C-A	ATP18	TFIID	32.8032	764	-1.60361	0.162343	-1.13524	-0.769238
YCR033W	SNT1	TFIID	32.8005	765	-2.05951	-0.0294925	-1.21113	-0.860936
YJL012C	VTC4	CR	32.7897	766	-3.46873	0.110848	-3.60445	-1.16196
YKL080W	VMA5	TFIID	32.7852	767	-1.76349	0.11064	-1.30205	-0.819355
YOR326W	MYO2	TFIID	32.7718	768	-1.85702	0.000578731	-1.28699	-0.719972
YCR082W	AHC2	TFIID	32.7529	769	-1.18801	0.209596	-1.41482	-0.414385
YLR432W	IMD3	CR	32.7358	770	-1.44017	-0.319346	-1.74254	-0.43558
YMR173W	DDR48	CR	32.7065	771	-3.87633	-1.99622	-2.09699	-0.949674
YBR029C	CDS1	TFIID	32.6938	772	-3.0106	-0.374949	-1.90503	-1.27801
YPL090C	RPS6A	TFIID	32.6934	773	-1.27528	-0.253495	-0.778218	-0.38292
YBR199W	KTR4	TFIID	32.673	774	-1.91418	-0.0409204	-1.40882	-0.963799
YER006W	NUG1	TFIID	32.6234	775	-0.72763	0.274594	-0.742631	-0.277353
YDL067C	COX9	TFIID	32.6183	776	-0.113614	0.312598	-1.16322	-0.921576
YDR280W	RRP45	TFIID	32.6091	777	-1.26449	0.0978555	-0.656244	-0.203408
YHR190W	ERG9	CR	32.563	778	-1.95752	-0.231625	-2.97461	-0.988266
YBL030C	PET9	CR	32.5494	779	-1.05127	0.0566153	-1.04159	-0.921779
YOR209C	NPT1	TFIID	32.5467	780	-1.43841	-0.0540588	-1.67498	-0.712158
YMR015C	ERG5	CR	32.5082	781	-1.82284	-1.33506	-1.21781	-0.569923
YLL029W	FRA1	TFIID	32.4797	782	-1.49799	0.0632192	-1.20374	-1.06208
YPR137W	RRP9	TFIID	32.4567	783	-0.947447	0.197764	-0.751125	-0.276629
YGL228W	SHE10	TFIID	32.4333	784	-1.85673	0.084444	-1.28796	-0.862247
YDR293C	SSD1	TFIID	32.4109	785	-2.13064	0.13254	-1.59127	-1.05168
YGL048C	RPT6	TFIID	32.4032	786	-1.73111	-0.0743647	-1.80432	-0.811049
YLR262C-A	TMA7	TFIID	32.373	787	-1.36352	0.0543858	-1.43598	-0.482551
YEL031W	SPF1	TFIID	32.3245	788	-1.54007	-0.0283056	-1.12819	-0.811828
YNL098C	RAS2	TFIID	32.3219	789	-2.05701	-0.0626006	-2.09766	-1.11246
YGR204W	ADE3	CR	32.3109	790	-1.26533	-0.23923	-1.14602	-0.835268
YEL013W	VAC8	TFIID	32.3091	791	-1.55066	0.123365	-1.12375	-0.849456
YER030W	CHZ1	TFIID	32.2279	792	-1.51061	0.206159	-1.17803	-0.619972
YFL005W	SEC4	TFIID	32.1757	793	-1.28323	-0.00330616	-1.14664	-0.683838
YOL029C	YOL029C	TFIID	32.1537	794	-1.46706	-0.253691	-1.58388	-0.96304
YNL157W	IGO1	TFIID	32.1276	795	-1.74798	-0.0434124	-1.14237	-0.67271
YCL064C	CHA1	CR	32.1174	796	-1.9236	-1.99233	-0.262003	-2.04893
YMR125W	STO1	TFIID	32.0785	797	-1.74712	0.125135	-1.0066	-0.722051
YJL061W	NUP82	TFIID	32.0421	798	-1.64739	0.158839	-1.32714	-0.532447
YOR046C	DBP5	TFIID	32.0207	799	-1.40339	0.082439	-1.27869	-0.662389
YJL138C	TIF2	CR	31.9919	800	-1.15211	-0.0496794	-1.35536	-0.650708
YFR031C-A	RPL2A	TFIID	31.9762	801	-1.16478	-0.0132037	-0.878353	-0.255888
YJR139C	HOM6	TFIID	31.9757	802	-0.911004	-0.24273	-1.56807	-0.791747
YOL004W	SIN3	TFIID	31.9597	803	-1.77534	0.0457436	-1.29786	-0.966441
YPR033C	HTS1	TFIID	31.9285	804	-0.734939	0.26619	-0.927483	-0.637305
YJL140W	RPB4	TFIID	31.8786	805	-1.34325	0.299604	-0.728522	-0.476559
YER112W	LSM4	TFIID	31.842	806	-1.60295	0.1752	-1.13188	-0.615776
YGL114W	YGL114W	CR	31.8378	807	-1.42612	-0.702817	-1.63634	-1.2505
YOR051C	ETT1	TFIID	31.82	808	-1.55667	-0.00709988	-1.13592	-0.354326
YML129C	COX14	TFIID	31.8037	809	-1.64797	0.22046	-1.32692	-0.687093
YDR211W	GCD6	TFIID	31.7969	810	-1.06842	0.250738	-1.1128	-0.62238
YKL181W	PRS1	TFIID	31.7727	811	-0.909629	0.256186	-1.18629	-0.482844
YDL191W	RPL35A	TFIID	31.7623	812	-1.03566	-0.249384	-0.879278	-0.30592
YDR483W	KRE2	TFIID	31.7223	813	-1.74469	-0.0898902	-1.9371	-0.956174
YJL167W	ERG20	CR	31.7201	814	-2.03604	-0.122716	-1.73868	-0.917929
YCR020W-B	HTL1	TFIID	31.7091	815	-0.882759	0.076096	-0.996702	-0.295756
YBR279W	PAF1	TFIID	31.6984	816	-1.92434	0.11938	-1.15389	-0.618589
YJL174W	KRE9	TFIID	31.6716	817	-1.49619	-0.0454643	-1.20993	-0.89905
YJR145C	RPS4A	TFIID	31.6376	818	-1.1156	-0.0727852	-0.632047	-0.427406
YOR260W	GCD1	TFIID	31.5731	819	-1.32574	0.198881	-1.21666	-0.518005
YOR317W	FAA1	TFIID	31.5597	820	-2.968	-0.556823	-2.76013	-1.74865
YNL037C	IDH1	CR	31.5338	821	-2.41286	-1.54294	-2.44322	-0.47467
YER049W	TPA1	TFIID	31.5045	822	-0.986174	-0.257525	-1.11786	-0.475222
YBR031W	RPL4A	TFIID	31.4313	823	-0.93763	-0.096546	-1.39492	-0.531736
YKL016C	ATP7	TFIID	31.4192	824	-1.05543	0.0897669	-1.57241	-1.05937
YOR184W	SER1	CR	31.3767	825	-0.620199	-0.471532	-0.51752	-0.728504
YER141W	COX15	TFIID	31.3668	826	-1.48902	-0.137999	-1.31811	-1.36108
YLR106C	MDN1	TFIID	31.3266	827	-1.31756	0.123888	-1.07106	-0.49305
YER155C	BEM2	TFIID	31.2933	828	-1.44434	-0.0186068	-1.7491	-0.794233
YGR065C	VHT1	CR	31.2838	829	-0.151326	-1.38227	-0.170944	-0.794484
YDR309C	GIC2	CR	31.2779	830	-1.44759	-0.152061	-1.66208	-0.671965
YER110C	KAP123	TFIID	31.2684	831	-1.21557	0.152388	-0.752863	-0.245896
YHR019C	DED81	TFIID	31.2683	832	-0.890118	0.093327	-0.579052	-0.742211
YDR372C	VPS74	TFIID	31.2129	833	-1.60013	0.21621	-1.02891	-0.681792
YBR071W	YBR071W	CR	31.1637	834	-3.42731	-0.900931	-1.42337	-0.582626
YDR308C	SRB7	TFIID	31.1422	835	-1.19683	0.193866	-0.990971	-0.532241
YKL160W	ELF1	TFIID	31.1325	836	-1.46599	0.213182	-1.33509	-0.472997
YDL132W	CDC53	TFIID	31.0903	837	-1.71927	0.0842375	-1.23557	-0.852214
YPR062W	FCY1	TFIID	31.073	838	-1.36271	0.303984	-1.45425	-0.82082
YOR123C	LEO1	TFIID	31.0304	839	-1.58325	0.151354	-1.14491	-0.623325
YDL066W	IDP1	CR	30.9888	840	0.010147	0.0695183	-0.670588	-1.17934
YBL004W	UTP20	TFIID	30.9525	841	-1.29712	0.15309	-1.09395	-0.385524
YCR028C-A	RIM1	TFIID	30.8882	842	-1.27334	0.100619	-1.11579	-0.438859
YNL137C	NAM9	TFIID	30.8715	843	-1.60019	0.203741	-1.14858	-0.744515
YPL158C	AIM44	CR	30.8694	844	-2.30942	-0.975736	-1.75319	-0.661709
YLR244C	MAP1	TFIID	30.8671	845	-1.71964	-0.138264	-1.82725	-0.840468
YPR028W	YOP1	CR	30.8251	846	-2.31673	-0.432539	-2.1748	-0.894312
YNL084C	END3	TFIID	30.8235	847	-1.96977	0.00971098	-1.5648	-0.802828
YGR270W	YTA7	TFIID	30.8115	848	-1.97147	0.0117134	-1.21816	-0.832784
YOL081W	IRA2	TFIID	30.809	849	-1.80281	-0.0233211	-1.60213	-1.03969
YDR074W	TPS2	CR	30.7883	850	-3.73918	-0.464304	-2.70912	-2.07075
YBL051C	PIN4	TFIID	30.7551	851	-1.95817	0.166086	-1.4549	-0.968834
YGL137W	SEC27	TFIID	30.7213	852	-1.76564	0.100886	-1.31153	-0.928709
YBL047C	EDE1	TFIID	30.7027	853	-2.36023	-0.0537979	-1.5046	-1.16394
YLR196W	PWP1	TFIID	30.7023	854	-0.563382	0.142795	-0.771205	-0.261071
YDL195W	SEC31	TFIID	30.6909	855	-1.99116	-0.0335378	-1.47916	-1.18026
YGL252C	RTG2	TFIID	30.6842	856	-1.51625	-0.145836	-1.17019	-0.973871
YKR066C	CCP1	CR	30.677	857	-1.30915	0.29191	-1.25635	-1.02204
YHR208W	BAT1	TFIID	30.6547	858	0.088824	0.49545	-1.61274	-0.501514
YNL307C	MCK1	TFIID	30.6528	859	-1.92567	-0.0204114	-1.42852	-1.12392
YIR017C	MET28	CR	30.6498	860	-0.633529	-0.12125	0.930835	0.184889
YPL126W	NAN1	TFIID	30.6393	861	-0.942254	0.157638	-0.660566	-0.182698
YDR529C	QCR7	TFIID	30.6305	862	-0.990875	0.5186	-1.55455	-0.953583
YDL134C	PPH21	TFIID	30.6293	863	-1.68935	0.139759	-1.39159	-0.931763
YLR025W	SNF7	TFIID	30.6258	864	-1.65141	0.218816	-1.09927	-0.719986
YDL136W	RPL35B	TFIID	30.5427	865	-1.39685	-0.193203	-0.964979	-0.44727
YDR168W	CDC37	TFIID	30.5044	866	-1.49164	0.13921	-1.41394	-0.681864
YJR076C	CDC11	TFIID	30.4478	867	-2.08436	-0.109542	-1.22029	-0.780631
YDR025W	RPS11A	TFIID	30.4343	868	-1.12507	0.00416632	-0.799727	-0.116954
YOR194C	TOA1	TFIID	30.4225	869	-1.74992	0.0194766	-1.40073	-0.592097
YMR311C	GLC8	TFIID	30.4142	870	-1.63495	0.0738575	-1.27932	-0.789335
YGR187C	HGH1	TFIID	30.4047	871	-0.97637	0.145496	-0.279332	-0.0600527
YOR014W	RTS1	TFIID	30.393	872	-1.93721	-0.00581827	-1.49291	-1.09338
YHR089C	GAR1	TFIID	30.3667	873	-1.02575	0.0812144	-1.27573	-0.654878
YLR406C	RPL31B	TFIID	30.3369	874	-1.11777	-0.128721	-0.766735	-0.141574
YPL235W	RVB2	TFIID	30.3304	875	-1.55264	0.121491	-1.29351	-0.739913
YLR399C	BDF1	CR	30.3285	876	-3.2821	-0.915999	-0.607776	-0.250241
YPL169C	MEX67	TFIID	30.3192	877	-1.81467	0.0694961	-1.39998	-0.727801
YBR221C	PDB1	TFIID	30.2547	878	-1.39027	-0.0506807	-1.44992	-0.88052
YMR195W	ICY1	CR	30.2398	879	-2.3178	-0.604632	-0.444967	-1.35717
YMR266W	RSN1	CR	30.1951	880	-2.37375	-1.16989	-2.09258	-0.88777
YFR001W	LOC1	TFIID	30.1793	881	-1.15159	0.185781	-0.786965	0.0542671
YBL079W	NUP170	TFIID	30.173	882	-1.73673	0.0664415	-0.996113	-0.587644
YDL031W	DBP10	TFIID	30.1301	883	-1.1683	0.353012	-0.965667	-0.378117
YLR387C	REH1	TFIID	30.1013	884	-1.25883	-0.0583326	-1.38073	-0.524696
YFR030W	MET10	TFIID	30.089	885	0.954215	0.082976	-0.057743	-0.306262
YBR191W	RPL21A	TFIID	30.0825	886	-1.25148	-0.18118	-1.03267	-0.293584
YLR449W	FPR4	TFIID	30.0658	887	-1.44898	0.222801	-1.57458	-0.413804
YGR281W	YOR1	CR	30.0638	888	-2.81158	-1.12814	-1.41997	-1.01575
YDR404C	RPB7	TFIID	30.0339	889	-1.85494	0.154573	-1.25557	-0.788104
YPL063W	TIM50	TFIID	30.0297	890	-1.72742	0.112654	-1.3395	-0.728448
YML108W	YML108W	TFIID	30.0134	891	-0.303362	0.104818	-0.404735	0.150417
YHR205W	SCH9	TFIID	30.0061	892	-1.36499	0.0302005	-1.18244	-0.784286
YDL153C	SAS10	TFIID	29.9977	893	-0.8951	0.335422	-1.1156	-0.163945
YLR452C	SST2	CR	29.9693	894	-0.568914	0.00824823	-2.63288	0.144272
YJL158C	CIS3	CR	29.9676	895	-2.12579	-1.01004	-2.20688	-0.624676
YLL018C	DPS1	TFIID	29.9635	896	-0.957737	0.367188	-0.59007	-0.653769
YDR069C	DOA4	CR	29.9448	897	-1.97464	-0.402415	-1.42073	-1.18931
YBR039W	ATP3	TFIID	29.9323	898	-1.53933	0.0615734	-1.24401	-0.901896
YGL167C	PMR1	TFIID	29.931	899	-1.70309	-0.00260766	-0.827232	-0.757073
YHR068W	DYS1	TFIID	29.9199	900	-1.29504	-0.142152	-1.11305	-0.455735
YBR207W	FTH1	TFIID	29.8945	901	-1.05651	-0.366596	-1.32335	-0.88597
YER125W	RSP5	TFIID	29.8863	902	-2.01628	0.0867208	-1.57843	-1.02678
YDR303C	RSC3	TFIID	29.8817	903	-2.20585	0.152823	-1.22171	-0.807742
YGL092W	NUP145	TFIID	29.852	904	-1.6443	0.037382	-1.34321	-0.755746
YJL123C	MTC1	TFIID	29.8408	905	-1.63683	0.16865	-1.08113	-0.71245
YOL097C	WRS1	TFIID	29.8348	906	-1.20661	0.293813	-1.42159	-0.798473
YOR362C	PRE10	TFIID	29.8323	907	-1.64292	-0.139534	-1.64156	-0.721738
YKL007W	CAP1	TFIID	29.8127	908	-2.12361	0.111396	-1.376	-0.98454
YHR066W	SSF1	TFIID	29.8119	909	-0.59985	0.28631	-0.582751	-0.0369263
YGR119C	NUP57	TFIID	29.7806	910	-1.47164	0.211627	-1.06	-0.702027
YDR324C	UTP4	TFIID	29.7799	911	-1.1826	0.297853	-0.844645	-0.245094
YGL202W	ARO8	TFIID	29.7779	912	-1.02793	0.0244606	-0.794482	-0.91027
YDR322C-A	TIM11	TFIID	29.7643	913	-1.10551	0.141056	-1.76957	-0.779756
YKL195W	MIA40	TFIID	29.7536	914	-1.93548	0.0653735	-1.63549	-0.790942
YDR052C	DBF4	TFIID	29.753	915	-1.87725	0.0388731	-1.10167	-0.615331
YDR245W	MNN10	TFIID	29.7428	916	-1.56214	-0.138677	-1.26951	-0.710576
YML008C	ERG6	CR	29.7202	917	-2.32179	-1.06893	-1.07515	-0.316131
YMR083W	ADH3	TFIID	29.6877	918	-0.48255	-0.412736	-1.02006	-0.502736
YBR172C	SMY2	TFIID	29.6723	919	-1.16386	0.225383	-0.968703	-0.704113
YJR137C	MET5	TFIID	29.6699	920	1.40635	0.321347	-0.684536	-0.47657
YML053C	YML053C	TFIID	29.6585	921	-1.82547	0.421031	-1.14082	-0.654959
YDL100C	GET3	TFIID	29.5805	922	-1.51995	0.0350118	-1.42567	-0.764859
YLR208W	SEC13	TFIID	29.5714	923	-1.46876	0.0323741	-1.2336	-0.847784
YDR145W	TAF12	TFIID	29.5655	924	-1.73213	0.227811	-1.25213	-0.683172
YDR412W	RRP17	TFIID	29.513	925	-1.35652	0.220779	-0.832682	-0.0373201
YHR098C	SFB3	TFIID	29.5056	926	-1.94139	-0.190386	-1.19626	-0.784502
YGR284C	ERV29	TFIID	29.4869	927	-1.96506	-0.0740092	-1.36692	-0.878112
YML117W	NAB6	TFIID	29.463	928	-2.05951	-0.169584	-1.65271	-1.14296
YIL109C	SEC24	TFIID	29.4604	929	-1.84939	-0.0836948	-1.37503	-1.00582
YOR182C	RPS30B	TFIID	29.4463	930	-0.768919	-0.120829	-0.817256	-0.166227
YML072C	TCB3	TFIID	29.418	931	-1.91705	-0.0391897	-1.66402	-0.83055
YDL205C	HEM3	CR	29.3306	932	-1.25594	0.038932	-1.1258	-0.506555
YDR208W	MSS4	TFIID	29.3103	933	-1.68521	-0.00200177	-1.37518	-1.02942
YLR403W	SFP1	TFIID	29.2906	934	-1.31741	-0.254945	-1.31302	-0.945701
YNL302C	RPS19B	TFIID	29.2869	935	-1.17867	-0.0736098	-0.899653	-0.488076
YOR058C	ASE1	TFIID	29.2528	936	-0.857202	-0.213027	-1.40246	-0.86129
YDR251W	PAM1	TFIID	29.2341	937	-2.11246	-0.169872	-1.7731	-1.02973
YDR361C	BCP1	TFIID	29.2329	938	-0.843892	0.0386595	-0.943745	-0.0851978
YDR170C	SEC7	TFIID	29.2184	939	-1.69242	0.0538574	-1.17674	-0.775134
YHR023W	MYO1	TFIID	29.2181	940	-1.91715	-0.0626898	-1.04513	-0.735451
YPL218W	SAR1	TFIID	29.2171	941	-1.44629	0.024836	-1.35882	-0.93403
YLR309C	IMH1	TFIID	29.2044	942	-1.61051	0.206623	-1.09199	-0.420356
YHR010W	RPL27A	TFIID	29.1368	943	-0.947138	-0.119706	-0.393912	-0.347118
YJR073C	OPI3	CR	29.107	944	-5.47187	-0.941902	-3.27895	-1.33716
YLR192C	HCR1	TFIID	29.1004	945	-1.17823	-7.96e-05	-0.946894	-0.611146
YDL004W	ATP16	TFIID	29.0796	946	-1.74378	0.0609369	-1.43002	-0.809714
YJR002W	MPP10	TFIID	29.077	947	-1.18195	0.208813	-0.795716	-0.251168
YMR033W	ARP9	TFIID	29.0571	948	-1.64396	0.074252	-0.944336	-0.580768
YNL247W	YNL247W	TFIID	29.0515	949	-1.29163	0.130298	-0.951473	-0.463904
YOR047C	STD1	CR	29.0487	950	-1.82854	-0.0256432	-1.57921	-0.60458
YGL026C	TRP5	TFIID	29.0353	951	-0.549442	0.184063	-0.598488	-1.07909
YCR002C	CDC10	TFIID	29.0324	952	-1.43375	-0.0170914	-1.13558	-0.627522
YLR435W	TSR2	TFIID	29.0037	953	-0.88473	0.261776	-1.0709	-0.246751
YGR189C	CRH1	CR	28.9816	954	-1.82386	-0.701025	-0.625423	-0.616943
YDL015C	TSC13	TFIID	28.9768	955	-1.59473	-0.113117	-1.69854	-0.942462
YDR457W	TOM1	TFIID	28.972	956	-1.61182	0.19658	-1.08099	-0.596936
YKL135C	APL2	TFIID	28.9715	957	-1.59813	0.0920351	-1.1066	-0.708384
YKL142W	MRP8	TFIID	28.9261	958	-2.76317	-0.527005	-2.27438	-1.33427
YJR065C	ARP3	TFIID	28.9208	959	-2.2796	0.0626282	-1.69438	-1.03193
YKL086W	SRX1	CR	28.9188	960	-1.98945	-0.643707	-0.711185	-1.27259
YDL051W	LHP1	TFIID	28.8883	961	-0.891117	0.294839	-0.624696	-0.145083
YLR129W	DIP2	TFIID	28.8827	962	-1.21982	0.186718	-0.711686	-0.276482
YKL014C	URB1	TFIID	28.8733	963	-1.40774	0.196091	-0.846381	-0.369808
YJL039C	NUP192	TFIID	28.8215	964	-1.7076	0.00264555	-1.18818	-0.608911
YJL122W	ALB1	TFIID	28.8094	965	-0.968809	0.352162	-0.811038	-0.195724
YGL070C	RPB9	TFIID	28.7618	966	-1.20608	0.171421	-1.10423	-0.446482
YLL051C	FRE6	TFIID	28.7556	967	-0.878988	-0.444377	-0.811844	-1.06303
YER180C-A	SLO1	TFIID	28.735	968	-1.87373	0.0835217	-1.72535	-0.856943
YER042W	MXR1	CR	28.7157	969	0.328007	-0.52596	-0.460974	0.607394
YDL161W	ENT1	TFIID	28.704	970	-1.67507	0.0370458	-1.49152	-0.712267
YKL077W	YKL077W	TFIID	28.6773	971	-1.60374	-0.00899986	-1.7593	-0.852258
YLR170C	APS1	TFIID	28.6718	972	-1.74907	0.0166048	-1.46161	-0.664361
YMR216C	SKY1	TFIID	28.6428	973	-1.39629	-0.00971391	-1.00993	-0.808252
YLR223C	IFH1	TFIID	28.6196	974	-0.742328	0.222319	-0.636981	-0.195284
YNL271C	BNI1	TFIID	28.612	975	-1.96582	0.0767624	-1.18873	-0.790823
YGL225W	VRG4	TFIID	28.6088	976	-1.64201	-0.166919	-1.16062	-0.618688
YLR206W	ENT2	TFIID	28.6	977	-2.23032	0.12017	-1.47254	-1.15516
YER117W	RPL23B	TFIID	28.5996	978	-0.857297	0.0234207	-0.6479	-0.313163
YNR035C	ARC35	TFIID	28.5926	979	-1.92683	0.133703	-2.13136	-1.32434
YGL117W	YGL117W	CR	28.5728	980	-0.276501	-0.829188	0.128568	-0.989613
YOR187W	TUF1	TFIID	28.5149	981	-1.73597	0.0854725	-1.43428	-1.22781
YMR109W	MYO5	TFIID	28.5112	982	-2.13886	-0.0136507	-1.46832	-1.1245
YNL213C	RRG9	TFIID	28.5066	983	-1.34702	-0.13566	-1.32575	-0.679347
YNL055C	POR1	CR	28.4969	984	-0.655491	-0.679578	-2.42343	-1.59212
YOL038W	PRE6	TFIID	28.487	985	-1.70494	-0.160972	-1.862	-0.803562
YER161C	SPT2	TFIID	28.4439	986	-1.62996	0.170916	-1.32873	-0.686967
YJL179W	PFD1	TFIID	28.4318	987	-1.12868	0.419882	-1.19995	-0.39028
YLR225C	YLR225C	CR	28.4243	988	-1.52654	-0.243993	-1.51964	-0.592863
YLL048C	YBT1	TFIID	28.4163	989	-1.43713	0.18104	-1.18881	-0.826966
YDR300C	PRO1	TFIID	28.3997	990	-1.19442	0.0319667	-0.578286	-0.278264
YPR133C	SPN1	TFIID	28.3751	991	-1.42499	0.178412	-1.24614	-0.642185
YHL047C	ARN2	CR	28.2679	992	-0.915716	-1.06375	-0.819923	-2.04934
YML048W	GSF2	CR	28.2425	993	-1.60777	0.0439792	-1.46272	-0.872977
YOL076W	MDM20	TFIID	28.2133	994	-1.75324	0.0549687	-1.08216	-0.374966
YPR173C	VPS4	TFIID	28.2132	995	-1.74128	0.129691	-1.34206	-0.700685
YIL128W	MET18	TFIID	28.16	996	-1.63124	0.171305	-1.30612	-0.685721
YLR378C	SEC61	TFIID	28.158	997	-1.60839	-0.0752941	-1.12208	-0.980803
YKR001C	VPS1	TFIID	28.1394	998	-2.06471	0.0458223	-1.32428	-0.828518
YHR081W	LRP1	TFIID	28.1125	999	-1.29335	0.220169	-0.522918	-0.042575
YNL175C	NOP13	TFIID	28.1063	1000	-1.03246	-0.149145	-1.11242	-0.272342
YFR009W	GCN20	TFIID	28.101	1001	-1.72094	0.214862	-1.48146	-0.785476
YDL022W	GPD1	CR	28.0632	1002	-4.1473	-1.50942	-3.75641	-1.15174
YGL068W	MNP1	TFIID	28.0181	1003	-1.56137	0.206312	-1.43157	-0.997858
YBR112C	CYC8	TFIID	28.0175	1004	-2.19183	-0.12109	-1.56088	-1.06274
YMR080C	NAM7	TFIID	28.0014	1005	-1.30605	0.116808	-0.958948	-0.699719
YGR214W	RPS0A	TFIID	27.9994	1006	-1.2744	-0.0337244	-1.02186	-0.457853
YPR029C	APL4	TFIID	27.965	1007	-2.00535	0.0313913	-1.13351	-0.879408
YER086W	ILV1	TFIID	27.9273	1008	-0.541459	0.240426	-0.477849	-0.830892
YMR200W	ROT1	TFIID	27.9145	1009	-0.892329	0.194396	-0.728478	-0.615262
YDR432W	NPL3	TFIID	27.9104	1010	-1.62812	-0.387551	-1.63031	-0.72944
YCR035C	RRP43	TFIID	27.8989	1011	-1.10448	0.218125	-1.06279	-0.444804
YMR031C	EIS1	CR	27.8948	1012	-3.29841	-0.395256	-2.30956	-1.19866
YLR250W	SSP120	TFIID	27.8848	1013	-1.37321	-0.0136189	-0.964449	-0.580377
YKR035W-A	DID2	TFIID	27.8848	1014	-1.51804	0.150416	-1.5743	-0.742259
YIL027C	EMC5	TFIID	27.8786	1015	-1.2267	0.228366	-1.33098	-0.513468
YHL040C	ARN1	CR	27.8676	1016	-0.389285	-1.14117	-0.390321	-1.44135
YCR016W	YCR016W	TFIID	27.8451	1017	-1.09101	0.121575	-1.1063	-0.0926987
YGR271C-A	EFG1	TFIID	27.8428	1018	-0.713466	0.244607	-0.529138	-0.0705664
YDL121C	YDL121C	TFIID	27.8414	1019	-0.448592	0.220085	-0.183743	-0.131551
YPR148C	YPR148C	TFIID	27.8159	1020	-1.50844	0.111354	-0.805566	-0.724004
YLR330W	CHS5	TFIID	27.778	1021	-1.90957	0.10711	-1.01462	-0.693097
YLR222C	UTP13	TFIID	27.7551	1022	-1.01165	0.285575	-0.902556	-0.244041
YDR510W	SMT3	TFIID	27.7371	1023	-1.78846	-0.114689	-1.50693	-0.750316
YIL040W	APQ12	TFIID	27.7277	1024	-1.28304	0.0935873	-1.56637	-0.695591
YDL002C	NHP10	TFIID	27.7144	1025	-1.68657	-0.183781	-1.93248	-0.782261
YNR001C	CIT1	CR	27.7099	1026	-1.35325	-0.6328	-2.50728	-1.18181
YDL099W	BUG1	TFIID	27.669	1027	-1.5704	0.0985937	-1.44947	-0.59739
YDR339C	FCF1	TFIID	27.6644	1028	-1.22331	0.0973912	-1.50593	-0.602933
YMR043W	MCM1	CR	27.6527	1029	-2.13037	-0.160743	-1.97555	-0.836472
YML069W	POB3	TFIID	27.6356	1030	-1.62417	0.114994	-0.679619	-0.558945
YLR168C	UPS2	CR	27.6251	1031	-3.14764	-0.318318	-1.82716	-0.994763
YML010W	SPT5	TFIID	27.6243	1032	-1.72607	0.272342	-1.26857	-0.70675
YLL009C	COX17	TFIID	27.6173	1033	-1.17873	0.366534	-1.48465	-0.762548
YEL015W	EDC3	TFIID	27.6081	1034	-1.56456	0.0820669	-0.992339	-0.525894
YLL008W	DRS1	TFIID	27.5955	1035	-0.886743	0.40791	-0.769038	-0.107809
YBR173C	UMP1	TFIID	27.5888	1036	-1.50718	0.0633612	-1.63304	-0.804082
YIL130W	ASG1	TFIID	27.5248	1037	-1.37663	0.0981634	-1.12882	-0.728852
YGR083C	GCD2	TFIID	27.5071	1038	-1.32674	0.282491	-1.02982	-0.494183
YOR028C	CIN5	CR	27.4565	1039	-2.97815	-0.603223	-3.7221	-1.65552
YER138W-A	YER138W-A	CR	27.4526	1040	0.225346	-0.551401	-3.36565	-0.303209
YIL074C	SER33	TFIID	27.424	1041	0.0909181	0.0325368	-0.941389	-0.512865
YJR064W	CCT5	TFIID	27.3962	1042	-1.40668	0.0893079	-1.22976	-0.685377
YOR239W	ABP140	TFIID	27.3637	1043	-1.72192	-0.0508555	-1.21416	-0.626662
YMR049C	ERB1	TFIID	27.3597	1044	-0.899281	0.203941	-0.837115	-0.250012
YNL186W	UBP10	TFIID	27.3011	1045	-1.39999	-0.0906639	-1.08834	-0.47745
YGR105W	VMA21	TFIID	27.2569	1046	-1.47693	0.241484	-1.50721	-0.561279
YPL010W	RET3	TFIID	27.2416	1047	-1.4025	0.0739378	-1.17003	-0.675237
YPR112C	MRD1	TFIID	27.2185	1048	-0.748422	0.312436	-0.49003	-0.0390666
YBR248C	HIS7	TFIID	27.205	1049	-0.477295	0.286095	-0.321612	-0.673623
YNL077W	APJ1	TFIID	27.2048	1050	-1.95644	0.186271	-1.76253	-0.725385
YOR020W-A	YOR020W-A	TFIID	27.2043	1051	-1.75446	-0.138248	-2.17819	-1.14709
YPL032C	SVL3	TFIID	27.1954	1052	-2.32163	-0.261931	-1.70374	-0.776294
YDL225W	SHS1	TFIID	27.1898	1053	-1.4827	0.104278	-1.27047	-0.565984
YGR180C	RNR4	CR	27.1598	1054	-2.08185	-0.678776	-1.72581	-0.413452
YKL212W	SAC1	TFIID	27.1539	1055	-1.64006	-0.0379789	-1.16829	-0.716941
YMR290C	HAS1	TFIID	27.1518	1056	-0.555839	0.135843	-0.853553	-0.136553
YLR256W	HAP1	CR	27.1333	1057	-2.61977	-0.949092	-1.13754	-0.915545
YJR090C	GRR1	TFIID	27.1249	1058	-1.76019	0.0271143	-1.17239	-0.627609
YBR048W	RPS11B	CR	27.12	1059	-1.40961	0.138582	-0.883309	-0.367186
YHR088W	RPF1	TFIID	27.0995	1060	-0.672399	0.217146	-0.502583	0.0681291
YHL036W	MUP3	CR	27.0929	1061	-0.96915	-0.952185	-0.156265	-0.463331
YIL036W	CST6	TFIID	27.0421	1062	-1.96454	0.0413402	-1.16588	-1.05933
YBL105C	PKC1	TFIID	27.0369	1063	-1.65404	0.148581	-1.08109	-0.731191
YJR044C	VPS55	TFIID	27.0329	1064	-2.06925	-0.0361171	-1.80491	-1.05394
YNL176C	TDA7	CR	27.0008	1065	-1.70624	-0.818264	-1.81254	-1.22011
YOR158W	PET123	TFIID	26.9932	1066	-1.71195	0.135285	-1.43202	-0.773928
YKL175W	ZRT3	TFIID	26.9909	1067	-1.86018	-0.468874	-1.69763	-1.69651
YGL086W	MAD1	TFIID	26.9867	1068	-1.90397	0.0723599	-1.2195	-0.47562
YER105C	NUP157	TFIID	26.9813	1069	-1.70955	0.172565	-0.974627	-0.690282
YEL022W	GEA2	TFIID	26.9593	1070	-1.80427	0.125789	-0.971216	-0.611187
YBR017C	KAP104	TFIID	26.9534	1071	-1.60536	0.129702	-1.12035	-0.713362
YPR144C	NOC4	TFIID	26.9291	1072	-0.545158	0.139124	-0.857361	-0.293336
YBR171W	SEC66	TFIID	26.9237	1073	-1.76503	-0.0087891	-1.12336	-0.494075
YDL088C	ASM4	TFIID	26.8991	1074	-1.71106	0.172885	-0.931181	-0.560517
YEL002C	WBP1	TFIID	26.8575	1075	-1.59021	-0.00813296	-1.28428	-0.780537
YHR039C-A	VMA10	TFIID	26.8158	1076	-1.54492	-0.154135	-1.53304	-1.04934
YNL123W	NMA111	TFIID	26.8053	1077	-1.13612	0.0747351	-0.938351	-0.479045
YIL144W	NDC80	TFIID	26.7818	1078	-2.05473	-0.0828831	-0.792224	-0.545799
YFL034C-A	RPL22B	TFIID	26.7558	1079	-0.53309	-0.113849	-0.923153	-0.426447
YNL177C	MRPL22	TFIID	26.6928	1080	-1.83337	0.214704	-1.30213	-0.749093
YLR153C	ACS2	CR	26.682	1081	-1.78228	-0.232776	-1.53444	-0.62036
YPR048W	TAH18	TFIID	26.6558	1082	-0.77949	0.03047	-0.326225	-0.530623
YPL217C	BMS1	TFIID	26.6528	1083	-1.14488	0.241205	-0.95581	-0.400126
YLR200W	YKE2	TFIID	26.6506	1084	-1.09548	0.20562	-1.34477	-0.317724
YJL076W	NET1	TFIID	26.5853	1085	-1.84904	0.0867174	-1.25081	-0.837955
YER056C-A	RPL34A	TFIID	26.5781	1086	-1.55335	-0.123266	-0.789426	-0.261141
YLR163C	MAS1	TFIID	26.5387	1087	-1.25593	-0.0809821	-1.11257	-0.887381
YLR022C	SDO1	TFIID	26.5161	1088	-1.30069	0.230071	-1.12757	-0.287022
YER068W	MOT2	TFIID	26.5144	1089	-1.88383	0.0167976	-1.17426	-0.867952
YPR060C	ARO7	TFIID	26.5036	1090	-1.23955	0.213183	-1.53969	-0.549916
YHL020C	OPI1	TFIID	26.4875	1091	-2.41894	-0.1582	-1.47111	-0.954649
YDL005C	MED2	TFIID	26.4752	1092	-1.87148	0.0693847	-0.941636	-0.436041
YIL105C	SLM1	TFIID	26.4727	1093	-2.22065	0.0984988	-1.43652	-1.05449
YMR010W	YMR010W	TFIID	26.4715	1094	-1.52027	-0.096538	-0.854522	-0.799641
YAL029C	MYO4	TFIID	26.4537	1095	-1.6553	0.0835077	-1.19471	-0.54699
YJL026W	RNR2	CR	26.4405	1096	-1.83924	-0.583477	-1.6382	-0.462497
YGR009C	SEC9	TFIID	26.433	1097	-1.25329	0.0955097	-1.07595	-0.708036
YMR090W	YMR090W	CR	26.4069	1098	-2.89566	-1.18897	-2.36281	-2.12879
YOL028C	YAP7	TFIID	26.3836	1099	-1.20808	0.00680342	-1.35873	-0.780659
YIL076W	SEC28	TFIID	26.3765	1100	-1.59939	0.0938164	-1.3827	-0.747202
YBL058W	SHP1	TFIID	26.3499	1101	-1.75942	0.011234	-1.53034	-0.99629
YBR047W	FMP23	TFIID	26.3433	1102	-0.0673787	-0.587194	-0.704238	-1.74897
YBR069C	TAT1	CR	26.3251	1103	-3.08696	-1.52278	-1.07697	-0.678452
YOL036W	YOL036W	TFIID	26.314	1104	-1.38395	0.0422555	-0.899599	-0.752149
YER050C	RSM18	TFIID	26.3129	1105	-1.27511	0.550049	-1.002	-0.604587
YCR084C	TUP1	TFIID	26.303	1106	-1.88995	0.116062	-1.33492	-0.998882
YOL064C	MET22	TFIID	26.2931	1107	0.589399	0.405509	-0.469863	-0.997821
YLR034C	SMF3	CR	26.2424	1108	-1.3635	-0.250067	-1.03539	-0.841745
YPR101W	SNT309	TFIID	26.2356	1109	-1.16757	0.0798459	-1.07909	-0.405549
YLR229C	CDC42	TFIID	26.2084	1110	-1.7876	0.243222	-1.30791	-0.681683
YJR070C	LIA1	TFIID	26.1828	1111	-0.97174	0.0900116	-1.23149	-0.363513
YPR168W	NUT2	TFIID	26.1778	1112	-0.942564	-0.0875323	-1.11784	-0.813201
YLR287C	YLR287C	TFIID	26.1754	1113	-0.693427	0.0610426	-0.670011	-0.162355
YKL032C	IXR1	TFIID	26.1545	1114	-1.4633	0.3152	-1.18345	-0.786163
YGR233C	PHO81	TFIID	26.1189	1115	-3.36504	-0.0678273	-3.11207	-1.00625
YDR354W	TRP4	TFIID	26.1099	1116	-0.12909	-0.0194358	-0.74615	-0.727105
YJR004C	SAG1	CR	26.0543	1117	-1.69618	-0.155422	-3.39775	0.0226866
YKR016W	MIC60	TFIID	26.0317	1118	-1.99815	0.0789656	-1.6685	-0.957256
YGL071W	AFT1	TFIID	26.0263	1119	-1.20762	-0.247042	-1.01855	-0.800228
YLL039C	UBI4	CR	25.9944	1120	-1.80615	-0.859919	-2.1931	-1.43212
YER094C	PUP3	TFIID	25.959	1121	-1.33331	0.0304753	-1.4652	-0.691027
YDL065C	PEX19	TFIID	25.9568	1122	-1.14372	0.391963	-1.48688	-0.463317
YOR141C	ARP8	TFIID	25.956	1123	-1.39207	0.110041	-1.02929	-0.578265
YLL027W	ISA1	CR	25.9212	1124	-1.66132	0.365007	-0.802567	-0.326542
YER120W	SCS2	TFIID	25.8843	1125	-1.89194	0.0558624	-1.41395	-0.94765
YOR045W	TOM6	TFIID	25.8765	1126	-1.41468	0.0416803	-1.41325	-0.579609
YBR046C	ZTA1	CR	25.864	1127	-0.606786	-0.841912	-1.52338	-1.67686
YKR068C	BET3	TFIID	25.8597	1128	-1.21018	0.0987019	-0.821147	-0.452735
YDL155W	CLB3	TFIID	25.8378	1129	-1.75153	0.0436324	-0.836413	-0.546595
YOR116C	RPO31	TFIID	25.8217	1130	-1.41	0.206098	-0.82064	-0.560778
YJL166W	QCR8	TFIID	25.8102	1131	-1.29133	0.143029	-1.35869	-0.835444
YDL106C	PHO2	TFIID	25.8089	1132	-2.05674	0.234141	-1.3189	-0.812572
YER151C	UBP3	TFIID	25.8009	1133	-1.99967	-0.0240076	-1.41221	-0.819367
YDR525W-A	SNA2	TFIID	25.7999	1134	-0.811255	-0.209944	-0.284557	-0.442796
YBR164C	ARL1	TFIID	25.7208	1135	-1.32866	0.116407	-1.35595	-0.719498
YDR129C	SAC6	TFIID	25.6458	1136	-2.21723	-0.180345	-2.08903	-1.27654
YDL190C	UFD2	TFIID	25.6428	1137	-1.46651	0.226794	-0.949777	-0.849337
YDR449C	UTP6	TFIID	25.6424	1138	-0.7216	0.319969	-0.444868	-0.0347988
YMR091C	NPL6	TFIID	25.6284	1139	-1.53857	0.243133	-1.10083	-0.548418
YDR356W	SPC110	TFIID	25.5974	1140	-2.30739	-0.128353	-1.06245	-0.584084
YDR266C	HEL2	TFIID	25.5845	1141	-1.5007	0.208907	-1.18261	-0.646779
YEL055C	POL5	TFIID	25.5759	1142	-1.40274	0.194365	-0.728056	-0.248464
YGL120C	PRP43	TFIID	25.5707	1143	-1.21954	0.123531	-1.21868	-0.508391
YMR014W	BUD22	TFIID	25.5591	1144	-0.925533	0.345144	-0.625664	-0.0386118
YKR043C	SHB17	TFIID	25.5436	1145	-0.641331	0.318268	-1.11394	-0.508426
YDR292C	SRP101	TFIID	25.5417	1146	-1.5405	0.240902	-1.06803	-0.442053
YDR165W	TRM82	TFIID	25.4779	1147	-0.670283	0.130187	-1.08617	-0.329744
YLR027C	AAT2	CR	25.4732	1148	-1.29675	0.114963	-1.02279	-0.918153
YDR188W	CCT6	TFIID	25.4597	1149	-1.50492	0.0907364	-1.19096	-0.879328
YLR335W	NUP2	TFIID	25.4555	1150	-1.58808	0.131194	-1.09552	-0.607811
YNL243W	SLA2	TFIID	25.4089	1151	-1.41795	-0.14567	-1.43898	-1.15303
YOR195W	SLK19	TFIID	25.4048	1152	-1.66734	-0.00979852	-0.728851	-0.391418
YBR198C	TAF5	TFIID	25.396	1153	-1.55864	0.239402	-1.23491	-0.634296
YJL144W	YJL144W	CR	25.3788	1154	-3.92425	-0.379288	-4.27258	-2.0284
YNL267W	PIK1	TFIID	25.3696	1155	-1.72443	0.0628617	-1.27202	-0.746547
YPR086W	SUA7	TFIID	25.3408	1156	-0.896943	0.10902	-1.19271	-0.559753
YLL011W	SOF1	TFIID	25.3116	1157	-1.024	0.365945	-0.905998	-0.199714
YPR167C	MET16	TFIID	25.3087	1158	1.04438	-0.309063	-1.0453	-0.579634
YLR083C	EMP70	TFIID	25.2949	1159	-1.44043	0.201392	-0.796993	-0.438031
YNL169C	PSD1	CR	25.2861	1160	-4.20578	-0.596917	-2.59033	-1.22085
YPL129W	TAF14	TFIID	25.2812	1161	-1.35889	0.208099	-1.04934	-0.463334
YGR089W	NNF2	TFIID	25.2611	1162	-1.85232	0.0986666	-1.25634	-0.844572
YOR281C	PLP2	TFIID	25.2546	1163	-1.39841	0.104373	-1.47705	-0.715635
YOL061W	PRS5	TFIID	25.2494	1164	-1.28118	0.0903184	-1.09683	-0.660162
YGR026W	YGR026W	TFIID	25.2352	1165	-2.1467	-0.0802397	-1.87918	-1.09333
YMR197C	VTI1	TFIID	25.2222	1166	-1.84085	0.0994226	-1.37979	-0.74064
YGR061C	ADE6	TFIID	25.217	1167	-1.18273	-0.202077	-1.23505	-0.79385
YOR061W	CKA2	TFIID	25.2103	1168	-1.27388	0.160609	-1.34445	-0.619283
YML018C	YML018C	TFIID	25.2081	1169	-0.355845	0.00867713	-0.899505	-0.233234
YNR061C	YNR061C	TFIID	25.1891	1170	-1.50867	-0.0452734	-1.2657	-0.582298
YLR436C	ECM30	TFIID	25.1713	1171	-2.3602	-0.039097	-1.40255	-1.05803
YDR186C	YDR186C	TFIID	25.1496	1172	-1.0964	0.0795532	-1.10933	-0.638373
YNL059C	ARP5	TFIID	25.1492	1173	-1.5882	0.0760748	-1.34463	-0.753464
YGL115W	SNF4	TFIID	25.1472	1174	-2.12099	0.176978	-1.85245	-0.925033
YCL035C	GRX1	TFIID	25.1434	1175	-1.91715	0.123808	-2.29008	-1.09295
YNL103W	MET4	TFIID	25.1199	1176	-0.890687	0.10444	-0.503744	-0.732049
YBR247C	ENP1	TFIID	25.1196	1177	-0.760369	0.373529	-0.775299	-0.11543
YDL224C	WHI4	TFIID	25.1164	1178	-1.87766	0.129302	-1.09036	-0.873499
YPL009C	RQC2	TFIID	25.109	1179	-1.76654	0.112103	-1.3322	-0.579811
YNL032W	SIW14	TFIID	25.1033	1180	-1.22483	0.0838986	-1.32856	-0.501771
YDR101C	ARX1	TFIID	25.1028	1181	-0.719431	0.30793	-0.802878	-0.162356
YER019C-A	SBH2	TFIID	25.1003	1182	-1.31809	0.185038	-1.46723	-0.828168
YLR384C	IKI3	TFIID	25.0936	1183	-1.49314	0.288916	-1.07278	-0.509763
YJR005W	APL1	TFIID	25.0898	1184	-1.49935	0.142246	-1.02929	-0.564895
YOR147W	MDM32	TFIID	25.0788	1185	-1.64711	0.223793	-0.822775	-0.64996
YPR113W	PIS1	CR	25.055	1186	-1.92247	-0.314387	-2.20838	-0.750278
YAR002C-A	ERP1	TFIID	25.0334	1187	-1.64872	0.144417	-0.962292	-0.455253
YIL052C	RPL34B	TFIID	25.0159	1188	-0.832981	0.027217	-0.663144	-0.212068
YOR098C	NUP1	TFIID	25.0104	1189	-1.401	0.214646	-0.886782	-0.652913
YGL080W	MPC1	TFIID	24.9971	1190	-1.1436	0.200313	-0.888315	-0.775301
YHL001W	RPL14B	TFIID	24.976	1191	-1.10471	-0.0352392	-0.63332	-0.389477
YLL010C	PSR1	TFIID	24.9683	1192	-1.59311	0.0880377	-1.18814	-0.80529
YER048C	CAJ1	TFIID	24.9513	1193	-2.02485	0.117296	-1.37517	-0.689469
YDR257C	RKM4	TFIID	24.946	1194	-1.21256	0.166334	-0.669851	-0.527423
YGR078C	PAC10	TFIID	24.9414	1195	-1.15408	0.00167033	-1.19766	-0.52849
YHR108W	GGA2	TFIID	24.9267	1196	-1.88304	0.0141377	-1.61986	-0.85006
YCR077C	PAT1	TFIID	24.9134	1197	-1.64127	0.0733046	-1.32979	-0.951076
YEL063C	CAN1	TFIID	24.9115	1198	-1.01921	0.323289	-0.536775	-0.814709
YML004C	GLO1	TFIID	24.9036	1199	-1.60117	-0.00100016	-1.31461	-1.07017
YPR163C	TIF3	TFIID	24.8803	1200	-1.20005	0.185008	-1.10691	-0.684137
YGR134W	CAF130	TFIID	24.8803	1201	-1.39475	-0.219314	-1.04	-0.731556
YJR060W	CBF1	TFIID	24.8686	1202	-2.39169	0.0620496	-1.70209	-0.860662
YBL039C	URA7	TFIID	24.8674	1203	-0.777979	0.107886	-1.06774	-0.260661
YBR181C	RPS6B	TFIID	24.8364	1204	-1.14445	0.00264589	-0.424331	-0.335176
YNL155W	CUZ1	TFIID	24.8326	1205	-2.14991	-0.355158	-2.18779	-0.729604
YHL003C	LAG1	TFIID	24.8282	1206	-1.78293	-0.031254	-1.33822	-0.793763
YIL021W	RPB3	TFIID	24.7938	1207	-1.69627	0.177288	-1.21685	-0.528469
YFR039C	OSW7	TFIID	24.792	1208	-1.538	-0.250501	-1.26604	-0.723782
YKL088W	CAB3	TFIID	24.7759	1209	-1.68372	0.0890567	-1.48636	-0.879808
YDL058W	USO1	TFIID	24.771	1210	-1.55312	0.246097	-0.899291	-0.479852
YJL154C	VPS35	TFIID	24.7289	1211	-1.8056	-0.0646445	-1.61114	-0.82306
YGR186W	TFG1	TFIID	24.719	1212	-1.48114	0.125878	-1.32705	-0.908965
YJL041W	NSP1	TFIID	24.6915	1213	-1.77164	0.18399	-1.16081	-0.66327
YKR082W	NUP133	TFIID	24.6877	1214	-1.4727	-0.0411618	-1.21356	-0.531521
YDR176W	NGG1	TFIID	24.6588	1215	-1.94926	0.114644	-1.20274	-0.73393
YCR008W	SAT4	TFIID	24.6477	1216	-1.60524	0.122596	-1.36139	-0.811261
YOR327C	SNC2	TFIID	24.5969	1217	-1.52418	-0.806944	-1.16608	-0.525837
YCR106W	RDS1	TFIID	24.5866	1218	-2.24754	-0.177366	-0.405285	-1.20569
YMR054W	STV1	TFIID	24.5788	1219	-1.68407	0.00726688	-1.13078	-1.11457
YOR342C	YOR342C	TFIID	24.5739	1220	-1.8315	-0.291766	-1.20817	-0.277931
YLR190W	MMR1	TFIID	24.5635	1221	-2.12756	-0.102269	-1.49474	-0.767017
YHR065C	RRP3	TFIID	24.5455	1222	-1.25968	0.126908	-1.31296	-0.32119
YAR002W	NUP60	TFIID	24.518	1223	-1.51141	0.0286068	-1.28937	-0.57345
YLR008C	PAM18	TFIID	24.5032	1224	-1.13581	0.179504	-1.48263	-0.338659
YJL171C	YJL171C	CR	24.4816	1225	-2.06093	-0.298115	-0.895374	-0.956199
YDR351W	SBE2	TFIID	24.4762	1226	-1.22672	-0.0119698	-0.652176	-0.484086
YPL228W	CET1	TFIID	24.4728	1227	-1.9765	0.167827	-1.39413	-0.744904
YGR145W	ENP2	TFIID	24.4575	1228	-0.965952	0.367836	-0.616297	0.0878742
YMR062C	ARG7	TFIID	24.4554	1229	0.158428	0.674315	0.66446	-0.976415
YDR003W	RCR2	TFIID	24.4356	1230	-1.44093	-0.272908	-1.44961	-1.00709
YDR519W	FPR2	TFIID	24.3958	1231	-1.04903	-0.0425829	-1.19492	-0.704297
YHR099W	TRA1	TFIID	24.3901	1232	-1.67667	0.137407	-0.974157	-0.532278
YKL065C	YET1	TFIID	24.3896	1233	-1.79261	-0.110764	-1.32893	-1.02134
YKL094W	YJU3	TFIID	24.3763	1234	-1.66079	0.113613	-1.3988	-0.795815
YGR033C	TIM21	TFIID	24.372	1235	-1.22718	0.152854	-0.936847	-0.573775
YMR100W	MUB1	TFIID	24.3469	1236	-1.39885	0.0325794	-0.901242	-0.706215
YHR199C	AIM46	CR	24.3226	1237	-1.06483	-0.380729	-1.70455	-1.37195
YKL020C	SPT23	TFIID	24.2879	1238	-1.71773	0.157125	-1.10043	-0.900631
YIL022W	TIM44	TFIID	24.2872	1239	-1.29486	0.251011	-0.881448	-0.54882
YJL143W	TIM17	TFIID	24.2786	1240	-1.22072	0.213367	-1.2718	-0.748516
YLR409C	UTP21	TFIID	24.2693	1241	-1.43656	0.168991	-1.0854	-0.328426
YJL117W	PHO86	TFIID	24.258	1242	-1.90961	-0.0638191	-2.2508	-0.951372
YPL094C	SEC62	TFIID	24.2494	1243	-1.16115	-0.0207292	-1.5213	-0.681668
YGL014W	PUF4	TFIID	24.2481	1244	-1.50973	0.122713	-0.880838	-0.692092
YHR111W	UBA4	TFIID	24.2435	1245	-1.17256	-0.15066	-1.51787	-0.933047
YGR040W	KSS1	CR	24.2171	1246	-1.485	-0.238152	-1.60938	-0.690659
YIL115C	NUP159	TFIID	24.1851	1247	-1.76588	0.182943	-1.04202	-0.612064
YPL013C	MRPS16	TFIID	24.1689	1248	-1.65434	0.0227382	-1.40254	-0.5971
YJL050W	MTR4	TFIID	24.1545	1249	-1.0128	0.197616	-0.819869	-0.241441
YLR395C	COX8	TFIID	24.1342	1250	-1.95625	0.131894	-1.66422	-0.989122
YJL145W	SFH5	TFIID	24.1293	1251	-1.15765	-0.478187	-0.984556	-0.316069
YLR056W	ERG3	CR	24.0953	1252	-1.64109	-1.15173	-0.37158	-0.0601878
YJR016C	ILV3	CR	24.0933	1253	-0.947059	0.174699	-0.925412	-0.320478
YNL149C	PGA2	TFIID	24.0906	1254	-1.35349	-0.106314	-0.692678	-0.399309
YGR198W	YPP1	TFIID	24.0819	1255	-1.40695	-0.295007	-0.975293	-0.558775
YLR295C	ATP14	TFIID	24.0775	1256	-1.27997	0.187173	-1.09649	-1.04186
YOR207C	RET1	TFIID	24.077	1257	-1.21109	0.207906	-0.885888	-0.43445
YJL212C	OPT1	CR	24.0738	1258	-1.02453	-0.584628	-1.04328	0.396159
YPL259C	APM1	TFIID	24.0732	1259	-2.00227	0.0323642	-1.41314	-0.757331
YDR083W	RRP8	TFIID	24.073	1260	-0.976438	0.404671	-0.631008	0.0385116
YLR058C	SHM2	TFIID	24.0614	1261	-1.36022	-0.57011	-1.89024	-1.02004
YKL205W	LOS1	TFIID	24.0338	1262	-1.33314	0.0807644	-0.823143	-0.544253
YLR398C	SKI2	TFIID	24.0233	1263	-1.38008	0.21915	-1.13647	-0.58831
YPR159W	KRE6	TFIID	24.0082	1264	-1.11975	-0.237422	-1.27678	-0.847331
YLR359W	ADE13	TFIID	24.0069	1265	-1.62262	0.0350566	-1.23024	-0.788929
YLR344W	RPL26A	TFIID	24.0043	1266	-1.24987	0.0977338	-0.733539	-0.303921
YJR046W	TAH11	TFIID	24.0005	1267	-1.67273	0.127276	-0.967956	-0.503693
YCR057C	PWP2	TFIID	23.9983	1268	-0.757447	0.197868	-0.803872	-0.186135
YGL150C	INO80	TFIID	23.9711	1269	-1.83152	0.186607	-1.16278	-0.834238
YBL036C	YBL036C	TFIID	23.9563	1270	-1.2684	0.238881	-0.998597	-0.375263
YMR243C	ZRC1	TFIID	23.9517	1271	-1.10111	-0.0336602	-1.70773	-0.878158
YHR103W	SBE22	TFIID	23.9361	1272	-2.12892	-0.00654247	-1.64134	-0.690036
YIL070C	MAM33	TFIID	23.9145	1273	-1.51628	0.163148	-1.47804	-0.776688
YDR452W	PPN1	TFIID	23.8656	1274	-2.18416	0.0414425	-1.49647	-0.988435
YDL047W	SIT4	TFIID	23.8652	1275	-1.61187	0.0750122	-1.39992	-0.756296
YDL040C	NAT1	TFIID	23.8324	1276	-1.5393	0.136793	-1.13155	-0.745019
YMR089C	YTA12	TFIID	23.8125	1277	-1.71814	0.201975	-1.27413	-0.668346
YDR055W	PST1	CR	23.8097	1278	-2.95673	-0.945275	-2.0773	-0.790118
YOL006C	TOP1	TFIID	23.7954	1279	-1.67365	-0.0502095	-1.05791	-0.351509
YGR193C	PDX1	TFIID	23.7926	1280	-1.6307	0.000842861	-1.41869	-0.83726
YBR059C	AKL1	TFIID	23.7834	1281	-2.21822	-0.0753572	-1.62171	-1.12085
YNR043W	MVD1	TFIID	23.7533	1282	-1.08977	0.17871	-1.44932	-0.600444
YJR010W	MET3	TFIID	23.7467	1283	1.93187	-0.325997	-0.365593	0.247093
YPL028W	ERG10	TFIID	23.7354	1284	-0.980349	0.0700713	-0.95535	-0.577575
YJR041C	URB2	TFIID	23.7268	1285	-1.25566	0.160191	-0.795366	-0.224793
YDR385W	EFT2	TFIID	23.7106	1286	-1.43743	-0.16663	-1.09025	-0.405969
YOR304W	ISW2	TFIID	23.691	1287	-1.46323	0.200765	-0.917923	-0.603787
YDR045C	RPC11	TFIID	23.6694	1288	-0.6329	0.329063	-1.19255	-0.273206
YOR216C	RUD3	TFIID	23.6671	1289	-1.71758	0.0653684	-1.30278	-0.533648
YDR472W	TRS31	TFIID	23.647	1290	-1.91186	-0.333918	-1.3428	-0.610754
YJL004C	SYS1	TFIID	23.6404	1291	-1.31527	0.322855	-0.75794	-0.385011
YDR463W	STP1	TFIID	23.6067	1292	-1.49012	0.212833	-1.08665	-0.830533
YDL111C	RRP42	TFIID	23.6051	1293	-1.35711	0.130805	-1.0908	-0.459206
YKL068W	NUP100	TFIID	23.6011	1294	-0.70755	0.114578	-1.0563	-0.512524
YGR178C	PBP1	TFIID	23.5912	1295	-1.57702	-0.0116622	-1.41144	-0.883617
YPL137C	GIP3	TFIID	23.5728	1296	-1.18926	-0.295393	-2.41469	-1.24378
YOR222W	ODC2	CR	23.5686	1297	-1.2567	0.0974234	-0.867479	-1.08586
YGR060W	ERG25	CR	23.5576	1298	-1.89379	-1.0964	0.327354	-0.0790943
YOR107W	RGS2	CR	23.5544	1299	-2.57137	-0.979879	-0.407951	-1.27498
YAR014C	BUD14	TFIID	23.5369	1300	-1.28089	0.126978	-0.944409	-0.533106
YDR320C-A	DAD4	TFIID	23.5299	1301	-0.604088	-0.116917	-1.2051	-0.62429
YFR037C	RSC8	TFIID	23.4823	1302	-1.70171	0.202255	-1.33989	-0.730389
YBR088C	POL30	CR	23.4586	1303	-2.10319	-0.91878	-1.7983	-0.841927
YHR206W	SKN7	TFIID	23.4066	1304	-1.47452	0.243906	-1.06013	-0.646306
YDR068W	DOS2	TFIID	23.3966	1305	-1.48126	0.261126	-1.17701	-0.368858
YCL059C	KRR1	TFIID	23.3417	1306	-1.01785	0.164662	-1.21312	-0.125993
YOR305W	RRG7	TFIID	23.3353	1307	-1.20437	0.165111	-1.18813	-0.553453
YJL128C	PBS2	TFIID	23.3186	1308	-1.75158	0.0833233	-1.2259	-0.731146
YHR148W	IMP3	TFIID	23.3115	1309	-0.722762	0.332778	-0.643828	-0.0341035
YAL007C	ERP2	TFIID	23.3064	1310	-1.70155	0.00792727	-0.852517	-0.467691
YGL184C	STR3	CR	23.2984	1311	0.265313	-1.16191	2.05076	0.603971
YHR104W	GRE3	CR	23.2924	1312	-2.91014	-0.212532	-2.11679	-1.10871
YLR418C	CDC73	TFIID	23.2668	1313	-1.46089	-0.0164123	-1.06639	-0.714893
YNL258C	DSL1	TFIID	23.2548	1314	-1.75646	0.175506	-1.32775	-0.610448
YPR089W	YPR089W	TFIID	23.25	1315	-1.6521	0.151074	-1.2253	-0.672711
YLL013C	PUF3	TFIID	23.2482	1316	-1.64118	0.15558	-1.2136	-1.0584
YOL051W	GAL11	TFIID	23.2235	1317	-1.48633	0.118233	-1.21457	-0.93118
YMR047C	NUP116	TFIID	23.215	1318	-1.65995	0.120893	-1.23959	-0.898094
YDR298C	ATP5	TFIID	23.2114	1319	-1.46041	-0.0469513	-1.55145	-0.960472
YOL098C	YOL098C	TFIID	23.1979	1320	-1.7206	0.174781	-1.32995	-0.601162
YAL041W	CDC24	TFIID	23.1771	1321	-1.55483	0.0792814	-1.26054	-0.775139
YOR243C	PUS7	TFIID	23.1682	1322	-1.04835	0.338974	-0.87546	-0.399048
YGR195W	SKI6	TFIID	23.1603	1323	-1.25346	0.136669	-1.48205	-0.65533
YHL007C	STE20	TFIID	23.1491	1324	-1.4709	-0.111177	-1.47845	-0.705121
YLR248W	RCK2	TFIID	23.1424	1325	-1.58389	0.0437286	-1.29465	-0.633384
YKL101W	HSL1	CR	23.141	1326	-2.22603	-0.421425	-1.42539	-0.818327
YOL126C	MDH2	CR	23.129	1327	-2.78811	-0.510989	-1.51509	-0.29242
YBR256C	RIB5	CR	23.1064	1328	0.151869	-0.0958436	-0.203931	-1.04289
YGR280C	PXR1	TFIID	23.0846	1329	-0.994117	0.3594	-0.808712	0.0384001
YFL008W	SMC1	TFIID	23.0686	1330	-2.05538	0.0775996	-1.01218	-0.514615
YBL026W	LSM2	TFIID	23.0482	1331	-1.34909	-0.184447	-1.48868	-0.80525
YPL271W	ATP15	TFIID	23.0469	1332	-1.49921	-0.0852698	-0.870912	-0.788638
YLR314C	CDC3	TFIID	23.0348	1333	-1.70342	0.0376358	-1.07717	-0.77862
YOL119C	MCH4	CR	23.0335	1334	-0.32509	-0.041899	0.0459545	-0.834629
YMR319C	FET4	CR	23.0313	1335	-1.77211	-1.10646	-2.48302	-1.58943
YLR224W	YLR224W	TFIID	23.0293	1336	-1.49137	0.2001	-1.01329	-0.644436
YNL138W	SRV2	TFIID	23.0273	1337	-2.16661	0.0281473	-1.33459	-0.916306
YLR410W	VIP1	TFIID	23.0235	1338	-1.72567	0.234541	-1.86005	-0.910228
YDR227W	SIR4	TFIID	23.0229	1339	-1.77795	-0.0653287	-0.917417	-0.546502
YGL101W	YGL101W	TFIID	23.0207	1340	-1.89462	0.149384	-1.7046	-0.633453
YBR249C	ARO4	CR	22.9763	1341	0.0225497	0.509574	0.327321	-0.584593
YNR067C	DSE4	CR	22.967	1342	-3.75518	-1.25539	-1.10315	-0.750158
YNL001W	DOM34	TFIID	22.9641	1343	-1.10005	-0.0100044	-1.18918	-0.420352
YDR006C	SOK1	TFIID	22.9419	1344	-0.991601	-0.142977	-0.928774	-0.755721
YBR287W	YBR287W	TFIID	22.9352	1345	-2.33406	-0.333951	-2.42231	-1.29534
YNL004W	HRB1	TFIID	22.9351	1346	-0.998826	0.130248	-0.989468	-0.842823
YKL190W	CNB1	TFIID	22.9245	1347	-1.83125	-0.0174193	-1.27868	-0.704471
YOR162C	YRR1	TFIID	22.9234	1348	-1.4639	-0.418743	-1.68819	-1.06892
YOR212W	STE4	TFIID	22.9206	1349	-1.50357	-0.0511092	-2.90307	-0.657944
YGR191W	HIP1	TFIID	22.9038	1350	-0.639066	-0.0259963	-0.889655	-0.681129
YER008C	SEC3	TFIID	22.9017	1351	-1.93133	0.132842	-1.22132	-0.776354
YKL058W	TOA2	TFIID	22.8947	1352	-1.17525	0.257998	-1.145	-0.822522
YGL246C	RAI1	TFIID	22.8765	1353	-1.05867	0.0140519	-1.14957	-0.38126
YNL132W	KRE33	TFIID	22.8736	1354	-1.19729	0.216877	-1.04824	-0.368356
YOR244W	ESA1	TFIID	22.8681	1355	-1.48701	0.104972	-0.939286	-0.586161
YDR507C	GIN4	TFIID	22.8585	1356	-1.41677	-0.234403	-1.10177	-0.621022
YKL061W	BLI1	TFIID	22.8503	1357	-1.14803	0.336337	-0.977809	-0.466638
YJR003C	YJR003C	CR	22.8499	1358	-1.53949	0.248555	-0.880699	-0.284016
YNL263C	YIF1	TFIID	22.8478	1359	-1.94237	0.0707391	-1.02268	-0.786685
YNL192W	CHS1	CR	22.8327	1360	-1.71452	-0.337587	-1.41016	-0.543566
YJL036W	SNX4	TFIID	22.8258	1361	-1.94485	0.13433	-1.6332	-0.862039
YOL012C	HTZ1	TFIID	22.779	1362	-2.25287	-0.0941075	-1.56849	-1.22912
YNL297C	MON2	TFIID	22.7685	1363	-1.75922	0.11463	-1.19416	-0.889516
YDL063C	SYO1	TFIID	22.7677	1364	-0.430567	0.458445	-0.257464	0.131802
YBR036C	CSG2	TFIID	22.7577	1365	-1.48353	0.122548	-1.14337	-1.00233
YMR044W	IOC4	TFIID	22.7419	1366	-2.10016	0.188768	-1.34592	-0.728057
YDR500C	RPL37B	TFIID	22.7393	1367	-0.975193	-0.0745994	-0.909645	-0.582763
YOR354C	MSC6	TFIID	22.7364	1368	-1.64328	0.217053	-1.27321	-0.950148
YKL004W	AUR1	TFIID	22.7248	1369	-1.23637	0.020866	-0.838216	-0.409924
YPL011C	TAF3	TFIID	22.724	1370	-1.32016	0.212505	-0.821417	-0.361594
YJL010C	NOP9	TFIID	22.7132	1371	-1.34722	0.309616	-1.02884	-0.217265
YDL212W	SHR3	TFIID	22.7116	1372	-1.21541	0.14205	-1.25068	-0.709788
YNL135C	FPR1	CR	22.6748	1373	-0.831	0.100271	-0.922935	-0.515837
YNL130C	CPT1	CR	22.6637	1374	-2.58631	-0.322531	-1.80025	-1.12844
YOL021C	DIS3	TFIID	22.6407	1375	-1.51288	0.135692	-1.14352	-0.460819
YGL108C	YGL108C	TFIID	22.6357	1376	-1.39977	0.155477	-1.57673	-0.495865
YDR169C	STB3	TFIID	22.6165	1377	-2.12887	0.015955	-1.46138	-1.17065
YNL313C	EMW1	TFIID	22.5927	1378	-1.12988	0.200849	-0.62356	-0.212573
YCR034W	ELO2	TFIID	22.5764	1379	-1.9281	-0.0928157	-1.4754	-0.73674
YML001W	YPT7	TFIID	22.574	1380	-1.26704	0.257552	-1.41486	-0.754082
YDL171C	GLT1	TFIID	22.5738	1381	-1.03381	0.25055	-0.906432	-0.798026
YLR003C	CMS1	TFIID	22.5733	1382	-0.90302	0.166909	-1.07094	-0.160499
YER063W	THO1	TFIID	22.5697	1383	-1.66807	0.0335724	-1.63664	-0.892159
YKR063C	LAS1	TFIID	22.5526	1384	-1.17464	0.0606824	-0.815372	-0.403575
YDL072C	YET3	TFIID	22.551	1385	-1.76556	-0.298695	-1.75184	-1.17702
YKL176C	LST4	TFIID	22.5464	1386	-1.34935	-0.0385617	-1.30963	-0.973231
YIR033W	MGA2	TFIID	22.5312	1387	-1.48801	-0.269473	-1.6368	-0.632247
YKL185W	ASH1	CR	22.5187	1388	-3.02588	-1.03538	-1.30427	-0.467296
YKL044W	YKL044W	CR	22.5079	1389	-3.68186	-0.843221	-1.03958	-1.60001
YDR005C	MAF1	TFIID	22.5016	1390	-2.28585	0.182732	-1.67737	-0.988876
YNL191W	DUG3	TFIID	22.4607	1391	-0.825957	-0.183269	-0.714499	0.0577288
YNR019W	ARE2	CR	22.4547	1392	-3.67316	-1.00895	-1.11726	-1.02757
YBL064C	PRX1	CR	22.4524	1393	-2.25103	-0.554128	-2.48307	-1.38736
YNL041C	COG6	TFIID	22.4408	1394	-1.55352	0.196623	-0.7854	-0.577577
YKL143W	LTV1	TFIID	22.4338	1395	-0.595868	0.320167	-0.659802	0.0328729
YLR071C	RGR1	TFIID	22.4292	1396	-1.62351	0.0988844	-0.997065	-0.656073
YLR026C	SED5	TFIID	22.4168	1397	-1.71167	0.113985	-1.19433	-0.665563
YNL272C	SEC2	TFIID	22.4085	1398	-1.78401	0.108252	-0.72577	-0.585834
YOR227W	HER1	CR	22.4062	1399	-0.84556	0.153264	-1.77253	-1.08378
YOR285W	RDL1	TFIID	22.398	1400	-1.06891	-0.057627	-2.1612	-1.33716
YKL087C	CYT2	TFIID	22.3912	1401	-1.012	0.314335	-1.28868	-0.675868
YBR122C	MRPL36	TFIID	22.3818	1402	-1.54204	0.173464	-1.45655	-0.678874
YJR042W	NUP85	TFIID	22.378	1403	-1.51887	0.269571	-1.03791	-0.446068
YCR003W	MRPL32	TFIID	22.3554	1404	-1.05315	0.154748	-1.32527	-0.53366
YLR028C	ADE16	TFIID	22.355	1405	-1.60717	-0.0594799	-1.70781	-1.04036
YJL104W	PAM16	TFIID	22.3535	1406	-1.44102	0.119696	-1.28419	-0.535201
YDL226C	GCS1	TFIID	22.3482	1407	-1.56966	0.148025	-1.16488	-0.489418
YOR372C	NDD1	TFIID	22.3418	1408	-2.00992	-0.0737106	-0.650681	-0.760183
YOL020W	TAT2	TFIID	22.3174	1409	-0.824043	-0.224074	-1.1043	-0.753865
YDR210W	YDR210W	CR	22.3159	1410	-1.8996	-0.133734	-1.33206	-0.448377
YGR183C	QCR9	TFIID	22.3117	1411	-1.01735	-0.00459924	-1.08657	-0.902269
YDR262W	YDR262W	TFIID	22.3075	1412	-0.673936	0.0580192	-0.719492	-0.619515
YML086C	ALO1	TFIID	22.3058	1413	-1.30914	-0.258333	-1.57544	-0.946532
YIL041W	GVP36	TFIID	22.2919	1414	-1.53313	0.218826	-1.43983	-0.889317
YGR245C	SDA1	TFIID	22.2879	1415	-0.856678	0.31878	-0.582562	-0.326664
YNR038W	DBP6	TFIID	22.2813	1416	-1.02621	0.296886	-0.780434	-0.24046
YER022W	SRB4	TFIID	22.276	1417	-1.63841	0.175304	-1.35233	-0.641155
YDL035C	GPR1	TFIID	22.2753	1418	-1.29264	0.104908	-1.24024	-0.748407
YJR125C	ENT3	TFIID	22.2407	1419	-1.77371	0.214142	-1.27373	-0.877121
YCL030C	HIS4	CR	22.2324	1420	-0.562557	0.26676	0.863908	-1.11839
YLL021W	SPA2	TFIID	22.2142	1421	-1.84335	0.0380525	-0.921708	-0.596271
YOR159C	SME1	TFIID	22.2125	1422	-1.553	0.191363	-1.30957	-0.435634
YPL059W	GRX5	TFIID	22.1977	1423	-0.913003	0.0176745	-1.60344	-0.825922
YLR052W	IES3	TFIID	22.1922	1424	-1.45097	0.198731	-1.22831	-0.532841
YGL106W	MLC1	TFIID	22.151	1425	-1.31866	0.146158	-1.65368	-0.767744
YDR527W	RBA50	TFIID	22.1405	1426	-0.742798	0.0934685	-1.05995	-0.153845
YIL112W	HOS4	TFIID	22.1383	1427	-1.90166	0.166832	-1.32867	-0.73106
YOR375C	GDH1	CR	22.1306	1428	-0.986574	0.217961	-2.04177	-1.23444
YOR165W	SEY1	TFIID	22.1226	1429	-1.8014	0.00673165	-1.19956	-0.62401
YFL013C	IES1	TFIID	22.1206	1430	-1.63852	0.232618	-1.112	-0.69815
YKL033W-A	YKL033W-A	TFIID	22.1081	1431	-1.06633	0.184438	-0.246919	-0.768882
YNL221C	POP1	TFIID	22.1079	1432	-0.738132	0.0894106	-0.528772	-0.329049
YEL003W	GIM4	TFIID	22.0975	1433	-1.19642	0.255275	-0.816343	-0.287064
YOR142W	LSC1	CR	22.064	1434	-1.63202	0.0499096	-1.65753	-1.14354
YBR126C	TPS1	CR	22.0494	1435	-2.86756	-0.10113	-2.63394	-1.80843
YNR031C	SSK2	TFIID	22.0486	1436	-1.77893	-0.0139188	-1.26656	-0.792776
YMR001C-A	YMR001C-A	CR	22.0483	1437	-2.21623	-0.260151	-0.636037	-1.23078
YMR291W	TDA1	CR	22.0395	1438	-2.66059	-0.847704	-2.43503	-0.940198
YMR093W	UTP15	TFIID	22.0231	1439	-0.900869	0.322614	-0.583988	-0.255482
YJL192C	SOP4	TFIID	22.0213	1440	-1.29287	-0.0828387	-1.84469	-0.689885
YMR212C	EFR3	TFIID	22	1441	-1.59744	0.281585	-1.29582	-0.548599
YPR097W	YPR097W	TFIID	21.9982	1442	-1.80905	0.0611211	-1.14413	-0.548637
YNL268W	LYP1	TFIID	21.9956	1443	-0.824907	-0.218473	-1.00376	-0.903888
YLR336C	SGD1	TFIID	21.9513	1444	-0.759738	0.381431	-0.437057	0.0749104
YGL233W	SEC15	TFIID	21.9438	1445	-1.71697	0.209414	-1.25033	-0.679818
YGR207C	CIR1	TFIID	21.9331	1446	-1.15731	0.068508	-1.31859	-0.845281
YNL010W	YNL010W	TFIID	21.9239	1447	-1.70051	-0.00179816	-1.75421	-0.86668
YGR184C	UBR1	TFIID	21.9085	1448	-1.70923	0.0607641	-0.979096	-0.610293
YPL195W	APL5	TFIID	21.8823	1449	-1.68023	0.198678	-1.35888	-0.862055
YDR378C	LSM6	TFIID	21.8805	1450	-0.757252	0.340664	-1.07085	-0.601251
YBR253W	SRB6	TFIID	21.8799	1451	-1.28925	0.262418	-1.25528	-0.564209
YIL056W	VHR1	CR	21.8719	1452	-1.42911	-0.532667	-0.481885	-0.990997
YOR085W	OST3	TFIID	21.8286	1453	-1.86078	0.0925925	-1.39338	-0.95918
YHR026W	VMA16	TFIID	21.7996	1454	-1.29808	0.190825	-1.21625	-0.744161
YDL112W	TRM3	TFIID	21.7979	1455	-1.12395	0.257332	-0.608599	-0.177172
YLR357W	RSC2	TFIID	21.7932	1456	-1.59442	0.047459	-1.2273	-0.854801
YDL198C	GGC1	CR	21.7606	1457	-0.100304	-0.244629	-0.348014	-0.86146
YPR105C	COG4	TFIID	21.7566	1458	-1.44904	-0.0489703	-1.34994	-0.552948
YBR054W	YRO2	CR	21.7556	1459	-6.9838	-2.20732	-5.15359	-2.01874
YOR311C	DGK1	TFIID	21.7542	1460	-0.776443	0.162831	-0.974703	-0.819186
YHR006W	STP2	TFIID	21.7417	1461	-1.54767	0.0181175	-0.810439	-1.0901
YKR100C	SKG1	TFIID	21.7055	1462	-1.62467	0.218886	-1.26422	-0.816386
YGL013C	PDR1	TFIID	21.6934	1463	-1.63573	-0.114784	-1.26225	-0.599076
YPL053C	KTR6	TFIID	21.6858	1464	-1.71571	0.0498232	-1.07569	-0.682814
YJR134C	SGM1	TFIID	21.6776	1465	-1.81752	0.103323	-1.15057	-0.528247
YOR241W	MET7	TFIID	21.6756	1466	-1.37078	0.185283	-1.05018	-0.443044
YLL034C	RIX7	TFIID	21.6683	1467	-1.08423	0.31527	-0.832311	0.0161905
YGL038C	OCH1	CR	21.6623	1468	-2.03809	-0.0819016	-1.42797	-0.880902
YKL204W	EAP1	TFIID	21.659	1469	-1.69822	0.0622483	-1.38772	-0.79422
YDR146C	SWI5	TFIID	21.6338	1470	-2.93081	-0.140852	-1.81765	-1.04306
YKR031C	SPO14	TFIID	21.6325	1471	-1.7063	0.0430376	-1.08341	-0.891165
YPR125W	YLH47	TFIID	21.6284	1472	-1.18626	0.0541418	-1.09973	-0.441991
YKR061W	KTR2	CR	21.6061	1473	-0.847964	-0.922308	-1.62738	-0.707929
YMR255W	GFD1	TFIID	21.5995	1474	-1.9834	0.187938	-1.60405	-0.834137
YNL236W	SIN4	TFIID	21.5904	1475	-1.41893	0.212091	-1.08104	-0.688592
YOR191W	ULS1	TFIID	21.5899	1476	-1.85709	0.0854969	-1.20127	-0.708569
YIL030C	SSM4	TFIID	21.5853	1477	-1.31848	0.0566929	-0.720387	-0.569694
YBR179C	FZO1	TFIID	21.5827	1478	-1.67284	0.0599758	-1.05705	-0.699135
YDR034C	LYS14	TFIID	21.5816	1479	-1.09158	0.22842	-0.169932	-0.616157
YDR219C	MFB1	TFIID	21.56	1480	-2.15448	-0.0993737	-1.09458	-0.617339
YOR103C	OST2	TFIID	21.5469	1481	-0.978069	0.146575	-1.03486	-0.604862
YNL006W	LST8	TFIID	21.5437	1482	-1.40651	0.356154	-1.31859	-0.700672
YDR333C	RQC1	TFIID	21.5286	1483	-1.42419	0.26618	-0.820361	-0.582414
YDR027C	VPS54	TFIID	21.5227	1484	-1.99967	0.162972	-0.955503	-0.690147
YKR093W	PTR2	CR	21.4962	1485	-1.63178	0.0600627	-0.99143	-1.57652
YHR020W	YHR020W	TFIID	21.4868	1486	-0.741648	0.390363	-0.658859	-0.495484
YJL098W	SAP185	TFIID	21.4755	1487	-0.976043	0.246555	-0.720273	-0.0797396
YNL239W	LAP3	CR	21.4415	1488	-1.66944	-0.462162	-1.46832	-2.01961
YEL061C	CIN8	TFIID	21.4351	1489	-2.00786	-0.0699074	-0.781968	-0.622212
YGL140C	YGL140C	TFIID	21.4086	1490	-1.60012	0.270288	-1.13646	-0.777427
YPR070W	MED1	TFIID	21.3961	1491	-1.5091	0.0624198	-1.12365	-0.597513
YBL007C	SLA1	TFIID	21.3821	1492	-2.25256	0.10664	-1.45686	-0.981818
YNR068C	YNR068C	TFIID	21.3758	1493	-1.14814	-0.215636	-1.41504	-1.4361
YBR142W	MAK5	TFIID	21.374	1494	-0.857063	0.233187	-0.868379	-0.161007
YLR113W	HOG1	CR	21.3704	1495	-1.60411	-0.0271052	-2.12578	-0.597379
YER129W	SAK1	TFIID	21.3644	1496	-1.68385	0.223595	-0.906342	-0.726688
YNL252C	MRPL17	TFIID	21.3518	1497	-1.53284	0.0502893	-1.96354	-0.816149
YER127W	LCP5	TFIID	21.3466	1498	-0.53202	0.423452	-0.482375	0.0995597
YDR087C	RRP1	TFIID	21.3228	1499	-1.11849	0.31158	-0.986902	-0.0787592
YMR140W	SIP5	TFIID	21.322	1500	-1.55014	0.110275	-1.36153	-1.02344
YDR515W	SLF1	TFIID	21.3109	1501	-1.77411	-0.00331581	-1.76101	-0.489484
YGR158C	MTR3	TFIID	21.3011	1502	-1.15795	0.17363	-0.664676	-0.195716
YOR376W-A	YOR376W-A	TFIID	21.2906	1503	-2.32097	-0.258107	-1.17613	-0.916882
YMR256C	COX7	TFIID	21.2889	1504	-1.84289	-0.0307659	-1.68738	-0.89914
YER092W	IES5	TFIID	21.2854	1505	-0.441048	-0.00195662	-0.950723	-0.401151
YHR201C	PPX1	TFIID	21.2716	1506	-1.29707	0.101582	-1.44021	-0.635444
YJL176C	SWI3	TFIID	21.2625	1507	-1.79649	0.101565	-1.06649	-0.742094
YFL036W	RPO41	TFIID	21.2582	1508	-1.65667	0.115921	-1.36848	-0.856382
YDR468C	TLG1	TFIID	21.2525	1509	-1.37805	0.244923	-0.898307	-0.327873
YDL003W	MCD1	CR	21.2506	1510	-2.41952	-0.993067	-1.31948	-0.355527
YLR019W	PSR2	TFIID	21.2465	1511	-1.74574	0.137965	-1.40106	-0.9777
YDR407C	TRS120	TFIID	21.2276	1512	-1.69027	0.0747607	-0.801729	-0.734324
YFL048C	EMP47	TFIID	21.2232	1513	-1.51671	0.217199	-1.20871	-0.639851
YLR181C	VTA1	TFIID	21.2198	1514	-1.30435	0.0988284	-1.3014	-0.43206
YOR157C	PUP1	TFIID	21.2172	1515	-1.23732	-0.0264386	-1.70806	-0.808134
YGR200C	ELP2	TFIID	21.2068	1516	-1.274	0.23701	-0.856636	-0.387864
YOR021C	SFM1	TFIID	21.1998	1517	-0.879007	0.251973	-0.840908	-0.343801
YDR328C	SKP1	TFIID	21.1934	1518	-1.83021	0.191486	-1.42558	-0.656242
YMR153W	NUP53	TFIID	21.1721	1519	-1.36213	0.0614445	-1.04877	-0.512053
YER082C	UTP7	TFIID	21.1672	1520	-1.05487	0.288776	-0.906713	-0.0950434
YJL196C	ELO1	CR	21.1389	1521	-1.7037	-0.601286	-1.97956	-0.904405
YJL183W	MNN11	TFIID	21.133	1522	-1.42144	0.180983	-0.881308	-0.769916
YDR081C	PDC2	TFIID	21.1231	1523	-1.45741	0.167839	-0.779618	-0.529713
YER166W	DNF1	TFIID	21.1217	1524	-2.03399	-0.0444056	-1.20809	-0.869767
YBR140C	IRA1	TFIID	21.117	1525	-1.76784	0.120313	-1.12192	-0.677278
YJR091C	JSN1	TFIID	21.1088	1526	-1.98027	-0.0544766	-1.59086	-1.29277
YLR084C	RAX2	CR	21.0958	1527	-1.40189	-0.193302	-0.94817	-0.393096
YJR092W	BUD4	TFIID	21.0923	1528	-2.50712	-0.0750741	-1.34957	-0.766896
YDR326C	YSP2	TFIID	21.0884	1529	-1.34046	0.0461709	-0.8811	-0.721461
YBL085W	BOI1	TFIID	21.0817	1530	-2.13717	-0.111979	-1.59924	-0.857699
YHR049W	FSH1	CR	21.074	1531	-2.0542	-0.912678	-2.77407	-0.49387
YNR022C	MRPL50	TFIID	21.0702	1532	-1.21833	0.15665	-1.65703	-0.608318
YLR182W	SWI6	TFIID	21.0654	1533	-1.65035	0.0906689	-1.23447	-0.706273
YKR092C	SRP40	TFIID	21.0621	1534	-0.614932	0.461993	-0.517691	-0.351914
YIL094C	LYS12	TFIID	21.0565	1535	-0.0708147	-0.00427806	-0.434379	-0.573659
YGL151W	NUT1	TFIID	21.0508	1536	-1.8651	0.344627	-1.29034	-0.735563
YGR072W	UPF3	TFIID	21.0404	1537	-1.22222	0.320531	-1.60861	-0.572258
YOR283W	YOR283W	TFIID	21.0379	1538	-1.3418	0.10026	-1.30855	-0.732864
YDR150W	NUM1	TFIID	21.0311	1539	-1.91759	-0.11003	-1.36794	-0.836177
YHL002W	HSE1	TFIID	21.0161	1540	-1.70498	0.128239	-1.19799	-0.757648
YBR149W	ARA1	CR	21.0026	1541	-2.273	-0.141203	-2.66115	-1.71899
YGL090W	LIF1	TFIID	20.9868	1542	-1.61164	-0.0975231	-1.09385	-0.581318
YNL216W	RAP1	TFIID	20.9723	1543	-1.95023	0.255465	-1.04731	-0.610749
YLR023C	IZH3	TFIID	20.9706	1544	-0.611396	0.285543	-0.760748	-0.714149
YBL050W	SEC17	TFIID	20.9692	1545	-1.46456	0.123972	-1.2304	-0.758568
YKL154W	SRP102	TFIID	20.9635	1546	-1.27705	0.175976	-1.13866	-0.444696
YDL073W	YDL073W	TFIID	20.9581	1547	-1.23083	0.228727	-0.647588	-0.539916
YPL184C	MRN1	TFIID	20.9375	1548	-1.97	0.125618	-1.49066	-0.851361
YIL091C	UTP25	TFIID	20.9198	1549	-0.834133	0.334263	-0.640473	-0.0729101
YKL192C	ACP1	TFIID	20.9181	1550	-1.57529	-0.181277	-1.15861	-0.846403
YJL207C	LAA1	TFIID	20.9111	1551	-1.6889	0.174446	-0.824869	-0.497876
YLR371W	ROM2	TFIID	20.8986	1552	-1.97127	0.0459703	-1.15743	-0.873735
YKL213C	DOA1	TFIID	20.8942	1553	-2.00429	-0.0140302	-1.86944	-0.995516
YNL156C	NSG2	TFIID	20.8827	1554	-1.55197	-0.169763	-1.47106	-1.12938
YDR390C	UBA2	TFIID	20.8822	1555	-1.46861	0.233371	-0.989534	-0.455119
YPR008W	HAA1	TFIID	20.8782	1556	-1.84909	-0.00456365	-1.98949	-0.945612
YNL039W	BDP1	TFIID	20.8691	1557	-1.98186	0.137697	-1.51195	-0.605959
YEL001C	IRC22	TFIID	20.8522	1558	-1.2875	0.0939605	-1.03882	-0.404717
YDL085C-A	YDL085C-A	TFIID	20.8503	1559	-0.721284	0.111731	-0.548082	-0.342687
YDR334W	SWR1	TFIID	20.833	1560	-1.94187	-0.05859	-1.24556	-0.305809
YLR133W	CKI1	TFIID	20.823	1561	-3.46427	-0.268728	-2.16893	-1.22343
YMR129W	POM152	TFIID	20.7853	1562	-1.52808	0.213289	-0.798797	-0.428998
YJL069C	UTP18	TFIID	20.7847	1563	-0.684613	0.300225	-0.55922	-0.188473
YOR323C	PRO2	TFIID	20.7822	1564	-1.25627	0.22658	-0.726505	-0.701583
YLR370C	ARC18	TFIID	20.7761	1565	-2.16205	0.0129415	-1.50125	-0.872749
YMR305C	SCW10	CR	20.7729	1566	-2.20412	-0.360015	-0.0679592	-0.106748
YML031W	NDC1	TFIID	20.769	1567	-1.32694	0.2098	-1.02985	-0.670336
YJR086W	STE18	TFIID	20.7582	1568	-1.32596	0.0377546	-2.35393	-0.737845
YCR042C	TAF2	TFIID	20.7395	1569	-1.57975	0.21963	-1.02785	-0.707855
YGL091C	NBP35	TFIID	20.7296	1570	-0.532959	-0.158786	-1.42083	-1.03068
YBR165W	UBS1	TFIID	20.7277	1571	-1.54928	0.120394	-0.836328	-0.697568
YJL082W	IML2	CR	20.7129	1572	-3.52742	-1.17876	-2.9659	-1.90389
YER007C-A	TMA20	TFIID	20.7094	1573	-1.14543	-0.0201225	-1.31905	-0.553205
YPR100W	MRPL51	TFIID	20.709	1574	-1.77777	0.125972	-1.11701	-0.863002
YNL219C	ALG9	TFIID	20.7026	1575	-1.67371	5.05e-05	-1.01857	-0.637296
YOR145C	PNO1	TFIID	20.7005	1576	-0.569647	0.297383	-0.662521	-0.0805702
YOR048C	RAT1	TFIID	20.6861	1577	-1.46887	0.153659	-1.01231	-0.461225
YKR067W	GPT2	TFIID	20.6841	1578	-1.25582	0.430779	-1.51035	-1.27347
YDR166C	SEC5	TFIID	20.6775	1579	-1.89417	0.149157	-1.21534	-0.578557
YDR337W	MRPS28	TFIID	20.6729	1580	-1.72113	0.292906	-1.36375	-0.554598
YHR021C	RPS27B	TFIID	20.6727	1581	-0.62415	-0.18673	-0.748309	-0.278966
YNL167C	SKO1	TFIID	20.6451	1582	-2.06057	0.0318947	-1.30582	-0.875272
YEL007W	MIT1	CR	20.6425	1583	-1.54452	-0.0443424	-1.83759	-0.67122
YAL019W	FUN30	TFIID	20.6407	1584	-1.33959	0.215192	-0.961519	-0.482565
YOR124C	UBP2	TFIID	20.6321	1585	-1.91124	0.168671	-1.31864	-0.895563
YER176W	ECM32	TFIID	20.6273	1586	-1.00956	0.0787975	-0.869942	-0.677265
YMR149W	SWP1	TFIID	20.627	1587	-1.58914	0.239883	-1.25881	-0.807563
YMR064W	AEP1	TFIID	20.626	1588	-1.47011	0.248199	-0.75954	-0.594741
YNL232W	CSL4	TFIID	20.6228	1589	-0.763865	0.294323	-0.888165	-0.238425
YOR004W	UTP23	TFIID	20.6193	1590	-0.902299	0.0466274	-0.641592	0.097272
YOR315W	SFG1	CR	20.5934	1591	-2.43951	-0.195639	-0.876042	-0.450642
YDL167C	NRP1	TFIID	20.5831	1592	-0.775743	0.313249	-0.666057	-0.162487
YOR036W	PEP12	TFIID	20.5809	1593	-1.86003	0.0130249	-1.61106	-0.863431
YGL231C	EMC4	TFIID	20.5771	1594	-1.03308	0.294724	-1.8408	-0.561523
YMR004W	MVP1	TFIID	20.5717	1595	-2.09391	-0.242739	-1.74263	-0.65301
YGR082W	TOM20	TFIID	20.5586	1596	-1.45891	0.118163	-1.27816	-0.780805
YGR215W	RSM27	TFIID	20.5396	1597	-1.06529	0.233448	-1.14641	-0.441869
YDR177W	UBC1	TFIID	20.5257	1598	-1.11829	0.293618	-1.08375	-0.712854
YKL015W	PUT3	TFIID	20.5221	1599	-1.62182	0.19758	-0.551189	-0.600759
YEL037C	RAD23	TFIID	20.4986	1600	-1.52371	0.295426	-1.18402	-0.748484
YAL036C	RBG1	TFIID	20.498	1601	-0.445484	0.286283	-0.419638	0.0682434
YLR195C	NMT1	TFIID	20.4924	1602	-1.33708	0.215267	-1.10128	-0.58577
YER164W	CHD1	TFIID	20.4908	1603	-1.85726	0.309912	-1.21748	-0.837943
YLR093C	NYV1	TFIID	20.4625	1604	-1.75602	0.166654	-1.11337	-0.790823
YLR291C	GCD7	TFIID	20.4608	1605	-1.22177	0.148026	-1.44701	-0.675426
YML111W	BUL2	TFIID	20.449	1606	-1.52157	-0.119716	-1.24988	-0.681834
YDR162C	NBP2	TFIID	20.4442	1607	-1.10994	0.241083	-0.884152	-0.359073
YKL100C	YPF1	TFIID	20.4431	1608	-2.20811	0.108676	-1.87608	-1.1494
YJL060W	BNA3	TFIID	20.4251	1609	-0.441874	-0.0807971	-1.17293	-0.896637
YLR086W	SMC4	TFIID	20.4064	1610	-1.86919	0.0962138	-0.974529	-0.631176
YNL162W	RPL42A	TFIID	20.4057	1611	-1.12134	-0.192133	-0.595263	-0.388515
YKR026C	GCN3	TFIID	20.3996	1612	-1.28239	0.17369	-1.4124	-0.481251
YAL040C	CLN3	CR	20.3853	1613	-0.990599	-0.0605463	-0.97329	-0.590802
YJL110C	GZF3	TFIID	20.3717	1614	-1.46146	0.235176	-1.01141	-0.689137
YOR307C	SLY41	TFIID	20.3445	1615	-1.49001	0.184911	-1.11317	-0.618141
YBR002C	RER2	TFIID	20.3438	1616	-1.4073	0.2194	-0.630801	-0.426162
YDR423C	CAD1	TFIID	20.341	1617	-1.59134	-0.0158443	-1.01353	-0.788686
YIL116W	HIS5	CR	20.3297	1618	-0.589068	0.265548	0.316208	-1.07717
YDR505C	PSP1	TFIID	20.329	1619	-2.33007	0.144918	-1.6284	-1.12199
YDR477W	SNF1	TFIID	20.3117	1620	-2.11366	0.117853	-1.30259	-0.908631
YEL043W	YEL043W	TFIID	20.3038	1621	-1.51081	0.0858236	-1.52797	-0.959203
YDL095W	PMT1	TFIID	20.2725	1622	-1.80798	-0.048548	-1.22579	-1.0821
YPL085W	SEC16	TFIID	20.2543	1623	-1.79087	0.154378	-1.14418	-0.716285
YGL107C	RMD9	TFIID	20.2455	1624	-1.56392	0.290896	-0.963948	-0.651977
YLR312W-A	MRPL15	TFIID	20.2378	1625	-1.78128	0.362792	-1.36357	-0.522931
YNR017W	TIM23	TFIID	20.2011	1626	-1.31429	0.00539422	-1.30682	-0.666203
YML015C	TAF11	TFIID	20.1899	1627	-1.44195	0.199057	-1.54234	-0.514996
YMR237W	BCH1	TFIID	20.1887	1628	-1.976	0.247699	-1.35535	-0.908237
YDR388W	RVS167	TFIID	20.1883	1629	-1.91688	0.0139482	-1.48958	-0.956389
YGR123C	PPT1	TFIID	20.1816	1630	-1.46819	0.0146533	-1.20213	-0.311679
YNL300W	TOS6	CR	20.1608	1631	-3.3502	-1.60598	-0.436781	-0.626502
YDR331W	GPI8	TFIID	20.1583	1632	-1.83148	0.129937	-0.94725	-0.567216
YKR062W	TFA2	TFIID	20.1577	1633	-1.12987	0.0619675	-1.52762	-0.732192
YPL084W	BRO1	TFIID	20.1524	1634	-1.89034	0.214988	-1.48595	-0.811741
YPL183C	RTT10	TFIID	20.1467	1635	-1.13573	0.165572	-0.849129	-0.234319
YGL082W	YGL082W	TFIID	20.1421	1636	-2.01293	-0.0840975	-1.79238	-0.831792
YDR389W	SAC7	TFIID	20.1153	1637	-1.33599	0.13492	-1.08068	-0.722678
YNL188W	KAR1	TFIID	20.0917	1638	-1.54503	0.0707465	-1.11922	-0.338165
YBR080C	SEC18	TFIID	20.09	1639	-1.63472	0.0714933	-0.931329	-0.823215
YIR006C	PAN1	TFIID	20.0583	1640	-2.07565	0.060999	-1.54753	-0.989721
YGR274C	TAF1	TFIID	20.0521	1641	-1.62205	0.0754385	-1.28515	-0.619214
YBR187W	GDT1	TFIID	20.04	1642	-1.21561	-0.146642	-0.925325	-0.854327
YPL143W	RPL33A	TFIID	20.0378	1643	-0.998501	-0.172685	-0.97003	-0.318841
YHR030C	SLT2	TFIID	20.0356	1644	-1.35034	0.03117	-0.958422	-0.31975
YMR077C	VPS20	TFIID	20.0205	1645	-1.35239	0.209612	-0.793496	-0.269438
YPR189W	SKI3	TFIID	20.0108	1646	-1.60607	0.10597	-1.41822	-0.710258
YMR024W	MRPL3	TFIID	20.0028	1647	-1.71191	0.282478	-1.379	-0.683151
YJL044C	GYP6	TFIID	19.9888	1648	-1.58312	0.238933	-0.886158	-0.748832
YDL240W	LRG1	TFIID	19.9779	1649	-1.80202	0.0606109	-1.09082	-0.667511
YML062C	MFT1	TFIID	19.974	1650	-1.30459	0.345788	-1.5897	-0.478312
YLR274W	MCM5	TFIID	19.9717	1651	-1.44042	0.126591	-1.04971	-0.596201
YER080W	AIM9	TFIID	19.9652	1652	-1.91554	-0.0538281	-2.06846	-0.902185
YOR001W	RRP6	TFIID	19.9649	1653	-1.45159	0.260942	-0.94918	-0.339056
YKL126W	YPK1	TFIID	19.9472	1654	-2.40658	-0.065124	-1.02227	-0.736599
YMR099C	YMR099C	TFIID	19.9378	1655	-1.31548	0.319717	-1.65481	-0.900075
YDR116C	MRPL1	TFIID	19.9159	1656	-1.8258	0.209099	-1.64934	-0.764455
YLR298C	YHC1	TFIID	19.9122	1657	-1.65675	-0.0435101	-1.7104	-0.662715
YBL061C	SKT5	TFIID	19.9024	1658	-1.15441	0.0443839	-1.53217	-0.613416
YKR059W	TIF1	TFIID	19.8932	1659	-1.32707	0.134896	-1.3291	-0.76746
YLR332W	MID2	TFIID	19.8882	1660	-1.17468	-0.329998	-1.17419	-0.744641
YDR398W	UTP5	TFIID	19.8725	1661	-0.747397	0.0889244	-0.652735	-0.139113
YMR128W	ECM16	TFIID	19.8666	1662	-1.27761	0.306558	-1.03242	-0.207525
YGR250C	YGR250C	CR	19.8414	1663	-2.36119	-0.329371	-1.45841	-1.13597
YOR234C	RPL33B	TFIID	19.8393	1664	-0.88752	-0.0562858	-1.01068	-0.695737
YKR089C	TGL4	TFIID	19.8128	1665	-2.01637	0.00489158	-1.63647	-1.13868
YPR119W	CLB2	CR	19.8114	1666	-2.30042	0.0603222	-1.68117	-0.429549
YPR004C	AIM45	TFIID	19.7966	1667	-1.67149	0.00957584	-1.03924	-0.790232
YIL127C	RRT14	TFIID	19.7805	1668	-0.854534	0.0952283	-0.86813	0.230389
YLR079W	SIC1	CR	19.7586	1669	-2.04385	-0.210443	-1.45555	-0.656935
YIR004W	DJP1	TFIID	19.7442	1670	-1.50536	0.252565	-1.2897	-0.594348
YOR316C	COT1	TFIID	19.7373	1671	-1.04699	-0.356046	-1.29368	-1.29384
YPR161C	SGV1	TFIID	19.7128	1672	-1.68099	0.126469	-1.38091	-0.555261
YLL014W	EMC6	TFIID	19.711	1673	-1.40694	0.284811	-1.16458	-0.477013
YNL256W	FOL1	TFIID	19.6858	1674	-1.7265	-0.405314	-2.17384	-0.850626
YNL139C	THO2	TFIID	19.6534	1675	-1.81875	0.125107	-0.857674	-0.672782
YOR340C	RPA43	TFIID	19.6521	1676	-1.03178	0.358395	-0.749944	-0.0229172
YNL306W	MRPS18	TFIID	19.6321	1677	-1.59094	0.188205	-1.72425	-0.693461
YDR313C	PIB1	TFIID	19.6252	1678	-1.67443	-0.0160341	-1.20665	-0.656101
YEL052W	AFG1	TFIID	19.6143	1679	-1.20928	-0.142258	-1.36012	-0.999437
YOR056C	NOB1	TFIID	19.5955	1680	-0.697839	0.19948	-0.638682	-0.0973022
YGL194C	HOS2	TFIID	19.5934	1681	-1.44443	0.131087	-0.885436	-0.556427
YOR101W	RAS1	TFIID	19.588	1682	-1.44033	-0.558775	-1.36964	-0.456361
YKR096W	ESL2	TFIID	19.5825	1683	-1.60119	0.0874655	-1.26449	-0.823508
YKL109W	HAP4	CR	19.5803	1684	-2.41434	0.047697	-2.16197	-1.60894
YLR275W	SMD2	TFIID	19.5793	1685	-0.631873	0.248711	-0.456194	-0.23806
YGL020C	GET1	TFIID	19.5653	1686	-1.51658	0.157609	-1.58645	-0.581352
YML105C	SEC65	TFIID	19.5557	1687	-1.6751	0.168202	-1.42525	-0.579009
YOR030W	DFG16	TFIID	19.5458	1688	-1.67792	0.0135458	-0.968792	-0.824077
YKL049C	CSE4	TFIID	19.5358	1689	-1.38184	0.0695935	-0.709213	-0.132843
YLR412W	BER1	TFIID	19.5214	1690	-1.055	0.140771	-1.19114	-0.788659
YLR301W	HRI1	TFIID	19.4896	1691	-1.80288	0.00895021	-1.90454	-0.827695
YLR305C	STT4	TFIID	19.4807	1692	-1.79322	0.0778194	-1.16741	-0.667542
YOR322C	LDB19	TFIID	19.4779	1693	-1.42706	0.211443	-1.00481	-0.823573
YMR298W	LIP1	TFIID	19.4721	1694	-2.02386	-0.357641	-1.75046	-0.759943
YDR184C	ATC1	TFIID	19.4611	1695	-0.907675	0.295446	-0.918005	0.0854419
YDL037C	BSC1	CR	19.4488	1696	-4.14726	-1.49038	-1.82532	-0.365374
YNL201C	PSY2	TFIID	19.4467	1697	-1.15699	0.0563002	-1.13172	-0.331509
YHR107C	CDC12	TFIID	19.4463	1698	-1.69258	-0.0561052	-1.41805	-0.760795
YGR251W	NOP19	TFIID	19.4281	1699	-0.38366	0.229217	-0.487323	-0.0408938
YDR141C	DOP1	TFIID	19.4263	1700	-1.62115	0.166304	-1.16667	-0.702452
YHR009C	TDA3	TFIID	19.4185	1701	-1.70425	0.0431558	-1.27745	-0.892007
YDL060W	TSR1	TFIID	19.4184	1702	-0.765242	0.360682	-0.829768	-0.257416
YNL081C	SWS2	TFIID	19.416	1703	-1.11037	0.361959	-1.04685	-0.690674
YCL010C	SGF29	TFIID	19.4036	1704	-1.62163	0.147082	-1.02827	-0.906569
YMR272C	SCS7	CR	19.3698	1705	-2.26937	-0.113401	-2.00812	-0.8589
YER178W	PDA1	TFIID	19.3659	1706	-1.14593	0.13057	-1.3307	-0.954591
YLR363C	NMD4	TFIID	19.3606	1707	-1.44839	0.0703778	-0.835962	-0.408415
YIR018W	YAP5	TFIID	19.3326	1708	-0.224898	-0.0911721	-0.815683	-0.587125
YGL056C	SDS23	TFIID	19.3242	1709	-0.791772	0.13273	-0.894822	-0.626719
YNL075W	IMP4	TFIID	19.3119	1710	-0.56757	0.344063	-0.418747	-0.057642
YDR120C	TRM1	TFIID	19.307	1711	-0.742002	0.424323	-0.220317	-0.0544183
YGL171W	ROK1	TFIID	19.2998	1712	-0.96287	0.334368	-0.867395	-0.0553188
YDR373W	FRQ1	TFIID	19.2858	1713	-1.08472	0.0115986	-1.15091	-0.721018
YKL211C	TRP3	TFIID	19.277	1714	-0.567715	0.301807	-0.461894	-0.966142
YDL207W	GLE1	TFIID	19.2759	1715	-1.51275	0.122365	-1.04611	-0.446036
YLR401C	DUS3	TFIID	19.2657	1716	-0.864144	0.240781	-1.03348	-0.105883
YLR321C	SFH1	TFIID	19.2652	1717	-1.53895	0.189103	-1.10423	-0.471595
YLR038C	COX12	TFIID	19.2542	1718	-1.02523	0.26715	-1.08279	-0.64689
YNR047W	FPK1	TFIID	19.2514	1719	-1.66428	0.0841817	-1.04023	-0.903712
YLR185W	RPL37A	TFIID	19.2489	1720	-1.1339	0.0119341	-0.893198	-0.26977
YDR232W	HEM1	TFIID	19.2452	1721	-1.0636	0.111315	-1.15543	-0.746077
YOR075W	UFE1	TFIID	19.2442	1722	-1.81733	0.116593	-1.13399	-0.502205
YMR314W	PRE5	TFIID	19.2439	1723	-1.42679	0.293893	-1.50691	-0.743837
YBL103C	RTG3	TFIID	19.2297	1724	-1.24543	0.2041	-0.281707	-0.712469
YDR464W	SPP41	TFIID	19.229	1725	-1.81372	0.102769	-0.81937	-0.415982
YNL301C	RPL18B	CR	19.225	1726	-1.14747	0.253628	-1.28868	-0.461266
YPR042C	PUF2	TFIID	19.2194	1727	-1.72474	0.171744	-1.3259	-0.94734
YDR041W	RSM10	TFIID	19.2192	1728	-1.28478	-0.00729339	-0.762203	-0.519205
YBR245C	ISW1	TFIID	19.2161	1729	-1.84628	0.139636	-1.48426	-0.813176
YDR138W	HPR1	TFIID	19.2013	1730	-1.19027	0.3473	-0.72184	-0.685389
YJL096W	MRPL49	TFIID	19.1974	1731	-1.56678	0.129568	-1.15809	-0.498248
YIL062C	ARC15	TFIID	19.1926	1732	-1.88064	0.260443	-1.32363	-0.745539
YDL135C	RDI1	TFIID	19.178	1733	-0.956516	0.211648	-1.22632	-0.476407
YIL084C	SDS3	TFIID	19.1761	1734	-1.61747	0.125408	-1.65407	-0.873991
YNL161W	CBK1	TFIID	19.1753	1735	-1.1824	0.340554	-0.83742	-0.727418
YDR458C	HEH2	TFIID	19.1636	1736	-1.52812	0.243831	-1.61674	-0.571675
YML092C	PRE8	TFIID	19.1632	1737	-1.09331	0.0169389	-1.39215	-0.85467
YHR013C	ARD1	TFIID	19.1581	1738	-1.46891	0.0869755	-1.30466	-0.538185
YGL148W	ARO2	TFIID	19.1551	1739	-1.03334	0.0954462	-0.718948	-0.957987
YGL055W	OLE1	CR	19.1514	1740	-1.75777	-1.57365	0.256005	-0.228305
YDR001C	NTH1	CR	19.15	1741	-2.27961	-0.586409	-2.19404	-1.50763
YOR095C	RKI1	TFIID	19.1465	1742	-0.953057	-0.199969	-0.578368	0.202883
YGR074W	SMD1	TFIID	19.1426	1743	-1.43017	-0.00825077	-1.04505	-0.56927
YJL129C	TRK1	TFIID	19.1425	1744	-1.54605	0.105772	-1.26438	-0.527396
YHR090C	YNG2	TFIID	19.141	1745	-1.44614	0.168356	-0.799546	-0.632827
YHR152W	SPO12	TFIID	19.1387	1746	-1.49643	-0.232995	-1.19905	-0.504014
YGL039W	YGL039W	TFIID	19.1217	1747	-0.478115	-0.304983	-0.820956	-0.368106
YKL099C	UTP11	TFIID	19.1145	1748	-0.994628	0.406373	-0.427165	0.00396327
YOL030W	GAS5	CR	19.1055	1749	-1.4137	0.130283	-1.53569	-0.999303
YIL031W	ULP2	TFIID	19.1005	1750	-2.16089	0.0566119	-1.19578	-0.789822
YBR058C-A	TSC3	TFIID	19.0862	1751	-1.39797	0.295279	-1.18256	-0.91033
YPL189C-A	COA2	TFIID	19.0749	1752	-0.0249872	1.29494	-0.208632	-0.589015
YPL211W	NIP7	TFIID	19.058	1753	-0.932306	0.360121	-0.985799	-0.304359
YLR114C	AVL9	TFIID	19.0543	1754	-1.83736	0.1937	-1.0779	-0.693191
YHR123W	EPT1	TFIID	19.0533	1755	-2.74292	-0.348223	-1.84358	-0.967703
YOR272W	YTM1	TFIID	19.0293	1756	-0.910639	0.284444	-0.66085	-0.0434121
YPR025C	CCL1	TFIID	19.0214	1757	-1.14105	0.287877	-0.920059	-0.480641
YBL033C	RIB1	CR	19.0132	1758	-1.74338	-0.64621	-1.17996	-0.583092
YGR261C	APL6	TFIID	19.0045	1759	-1.76366	0.23	-1.59005	-0.719006
YLR045C	STU2	TFIID	19.0021	1760	-2.34812	-0.0386207	-0.736394	-0.601327
YDR161W	YDR161W	TFIID	19.0018	1761	-0.702471	0.362345	-0.554172	0.0325717
YKR056W	TRM2	TFIID	19.0018	1762	-0.634672	0.294453	-0.451574	0.0480332
YDR189W	SLY1	TFIID	18.9975	1763	-1.69464	0.125277	-1.33494	-0.720912
YBR151W	APD1	TFIID	18.9847	1764	-1.60988	-0.0743494	-1.59681	-0.825856
YNR074C	AIF1	CR	18.9684	1765	-1.22462	0.00664148	-1.05297	-1.09523
YKL167C	MRP49	TFIID	18.9437	1766	-1.73367	-0.047771	-2.16807	-0.701832
YIL129C	TAO3	TFIID	18.933	1767	-1.54817	0.122894	-0.968006	-0.635894
YDR454C	GUK1	TFIID	18.9309	1768	-1.23516	0.135257	-1.24698	-0.485747
YDL027C	YDL027C	TFIID	18.9236	1769	-2.51251	-0.0154489	-1.59339	-1.17769
YBR166C	TYR1	TFIID	18.9198	1770	-0.87933	0.256466	-0.863452	-0.663188
YGL200C	EMP24	TFIID	18.9167	1771	-1.77218	0.066993	-1.10847	-0.735228
YOL158C	ENB1	CR	18.9159	1772	-0.653455	-0.455043	-0.988421	-1.44756
YDR297W	SUR2	TFIID	18.9144	1773	-2.28115	-0.527155	-1.76417	-0.867626
YGL187C	COX4	TFIID	18.8855	1774	-1.35413	0.157771	-1.11991	-0.886567
YDR301W	CFT1	TFIID	18.8775	1775	-1.66814	0.135293	-0.894954	-0.727995
YGR084C	MRP13	TFIID	18.8749	1776	-1.67731	0.246929	-1.43454	-0.716096
YHR197W	RIX1	TFIID	18.8648	1777	-0.688933	0.316128	-0.631567	-0.0653938
YNR053C	NOG2	TFIID	18.8631	1778	-0.105503	0.19167	-0.234988	0.129785
YGR008C	STF2	CR	18.8597	1779	-3.1422	-0.92521	-3.49396	-2.25784
YKR030W	GMH1	TFIID	18.8433	1780	-1.26553	0.184316	-1.05356	-0.60447
YLR254C	NDL1	TFIID	18.8394	1781	-1.25714	0.117927	-1.08934	-0.654935
YDR017C	KCS1	TFIID	18.8267	1782	-2.15508	0.240746	-1.34417	-0.741336
YGL094C	PAN2	TFIID	18.8267	1783	-1.9996	-0.0507299	-1.19462	-0.661586
YNL261W	ORC5	TFIID	18.8218	1784	-1.11797	-0.130776	-1.85133	-0.461131
YBR281C	DUG2	TFIID	18.8172	1785	-0.829103	-0.0334422	-1.66	-0.298404
YLR166C	SEC10	TFIID	18.8142	1786	-1.83825	0.0918965	-1.24395	-0.572412
YEL056W	HAT2	TFIID	18.7969	1787	-1.53857	0.0834373	-1.18439	-0.782756
YJL165C	HAL5	TFIID	18.7968	1788	-1.906	0.148657	-1.38683	-0.876541
YOR109W	INP53	TFIID	18.7944	1789	-1.7853	0.184555	-1.58297	-0.955573
YJL005W	CYR1	TFIID	18.7743	1790	-2.68475	-0.02727	-2.09332	-1.08596
YPL020C	ULP1	TFIID	18.7682	1791	-1.24259	0.124754	-0.980196	-0.52947
YMR001C	CDC5	TFIID	18.7662	1792	-1.76028	0.127449	-1.31122	-0.670339
YOR035C	SHE4	TFIID	18.7654	1793	-1.96967	0.0934199	-0.88126	-0.703869
YCL045C	EMC1	TFIID	18.76	1794	-1.6846	0.239647	-1.12588	-0.825426
YKL186C	MTR2	TFIID	18.745	1795	-0.984872	0.187802	-0.832737	-0.309913
YPL070W	MUK1	TFIID	18.7405	1796	-1.70822	-0.0858266	-1.23357	-0.661381
YKR002W	PAP1	TFIID	18.7225	1797	-1.84001	0.0749895	-1.21039	-0.595746
YBR267W	REI1	TFIID	18.7222	1798	-0.774373	0.278345	-1.00882	-0.0419645
YBL078C	ATG8	TFIID	18.721	1799	-2.49118	0.0462711	-2.22383	-0.911193
YER175C	TMT1	TFIID	18.7209	1800	1.05608	-0.423151	-0.0844339	-1.90026
YNL027W	CRZ1	TFIID	18.7151	1801	-1.73809	0.0768441	-1.17376	-0.691742
YKR018C	YKR018C	TFIID	18.6958	1802	-1.64079	0.09789	-1.57112	-1.01994
YIL026C	IRR1	TFIID	18.6723	1803	-2.09328	0.0540045	-1.14429	-0.827538
YBL045C	COR1	TFIID	18.6678	1804	-2.22585	0.154496	-1.76334	-1.17041
YOR160W	MTR10	TFIID	18.6637	1805	-1.85713	0.0672255	-1.5427	-0.739511
YJR050W	ISY1	TFIID	18.6622	1806	-1.28773	-0.0190682	-0.726427	-0.381031
YJL197W	UBP12	TFIID	18.6614	1807	-1.91721	0.140792	-1.26702	-0.476418
YGR208W	SER2	TFIID	18.6573	1808	-1.31956	0.0537497	-1.3562	-0.702392
YCL057W	PRD1	TFIID	18.6544	1809	-1.81208	0.011768	-1.50464	-0.729081
YKL130C	SHE2	TFIID	18.6505	1810	-1.92638	0.0252668	-1.66775	-0.68039
YER100W	UBC6	TFIID	18.6334	1811	-1.28842	0.464105	-1.02578	-0.547172
YER035W	EDC2	CR	18.6288	1812	-3.2032	-0.49741	-1.51056	-0.746369
YGR038W	ORM1	TFIID	18.6193	1813	-1.80187	0.0183348	-1.60627	-0.751341
YNL090W	RHO2	TFIID	18.5964	1814	-1.76587	0.20037	-0.904838	-0.450391
YPR104C	FHL1	TFIID	18.5681	1815	-1.9294	0.135576	-0.907311	-0.529181
YLR186W	EMG1	TFIID	18.5653	1816	-0.883049	0.184639	-0.906866	-0.331024
YMR300C	ADE4	TFIID	18.549	1817	-1.08892	0.0360199	-1.43727	-0.766354
YHR073W	OSH3	TFIID	18.5482	1818	-1.37155	0.175658	-1.05203	-0.854303
YBR155W	CNS1	TFIID	18.5478	1819	-0.416298	0.106513	-0.703749	0.125661
YOL133W	HRT1	TFIID	18.5264	1820	-1.04124	-0.0290777	-1.29673	-0.843069
YFL007W	BLM10	TFIID	18.5263	1821	-1.69128	0.0790224	-1.23227	-0.543966
YGL040C	HEM2	TFIID	18.521	1822	-1.26696	-0.0792652	-1.43718	-0.363813
YPR020W	ATP20	TFIID	18.5186	1823	-0.971576	0.394218	-1.56094	-0.649592
YOR091W	TMA46	TFIID	18.5178	1824	-1.16804	0.20707	-1.24763	-0.377678
YOR108W	LEU9	TFIID	18.5144	1825	-0.55133	0.438037	-0.862133	-0.526496
YBR212W	NGR1	TFIID	18.5023	1826	-1.739	-0.0237731	-1.26499	-1.14669
YOR217W	RFC1	TFIID	18.486	1827	-1.65673	0.177554	-1.06179	-0.531265
YER146W	LSM5	TFIID	18.4816	1828	-0.47855	0.0202627	-1.35744	-0.62878
YPL057C	SUR1	CR	18.4489	1829	-2.45155	-0.839315	-0.743415	-0.241704
YAL059W	ECM1	TFIID	18.4401	1830	-0.861203	0.408644	-0.906864	-0.142134
YOR132W	VPS17	TFIID	18.4378	1831	-2.05748	-0.0227504	-1.74916	-1.00803
YJR010C-A	SPC1	TFIID	18.4294	1832	-1.69998	-0.217417	-0.89439	-0.582682
YDL056W	MBP1	TFIID	18.4255	1833	-1.73339	0.229298	-1.14752	-0.674407
YGR252W	GCN5	TFIID	18.4193	1834	-1.87127	0.134464	-10.3988	-0.578957
YPL242C	IQG1	TFIID	18.4127	1835	-2.1758	-0.00974983	-0.910837	-0.746148
YJR011C	YJR011C	TFIID	18.4015	1836	-2.01211	-0.13881	-1.94615	-0.891417
YKL128C	PMU1	TFIID	18.3764	1837	-1.60964	-0.275181	-1.62369	-1.03669
YCR067C	SED4	TFIID	18.3756	1838	-1.7645	0.155852	-1.41483	-1.04082
YLR429W	CRN1	TFIID	18.3672	1839	-1.63006	0.105569	-1.22818	-0.739791
YJL033W	HCA4	TFIID	18.363	1840	-0.612615	0.482366	-0.428846	0.0942426
YFR051C	RET2	TFIID	18.3588	1841	-1.87827	0.157709	-1.33794	-0.877987
YJL198W	PHO90	TFIID	18.3558	1842	-0.745073	0.192767	-0.796584	-0.463086
YEL053C	MAK10	TFIID	18.341	1843	-0.740039	0.0436697	-0.677916	-0.578167
YBL032W	HEK2	TFIID	18.3395	1844	-2.31639	-0.0349473	-1.53908	-0.885583
YLL001W	DNM1	TFIID	18.3379	1845	-1.59634	0.19771	-1.08771	-0.621488
YIL125W	KGD1	TFIID	18.3279	1846	-2.0019	0.201303	-1.39581	-0.995101
YIL090W	ICE2	TFIID	18.3235	1847	-1.08553	0.207895	-0.884819	-0.614489
YKR072C	SIS2	TFIID	18.3059	1848	-1.24367	0.246489	-0.780994	-0.721278
YDR485C	VPS72	TFIID	18.2923	1849	-1.48592	0.139106	-1.45292	-0.64107
YDR494W	RSM28	TFIID	18.2901	1850	-1.41293	0.304325	-1.08733	-0.523456
YOR086C	TCB1	TFIID	18.2826	1851	-2.63713	0.12803	-1.55509	-1.09077
YPR118W	MRI1	TFIID	18.2814	1852	-1.3396	0.00856827	-0.951358	-0.641425
YPR088C	SRP54	TFIID	18.2666	1853	-1.47422	0.248299	-1.37731	-0.625741
YDR181C	SAS4	TFIID	18.2203	1854	-1.61216	0.199314	-1.13585	-0.489318
YJR132W	NMD5	TFIID	18.2079	1855	-1.49972	0.177038	-0.934213	-0.375405
YAL017W	PSK1	TFIID	18.2058	1856	-2.62233	0.0923182	-1.71583	-1.11337
YGL172W	NUP49	TFIID	18.1922	1857	-1.74134	0.296204	-1.21905	-0.581716
YPR069C	SPE3	CR	18.1818	1858	-1.57499	-0.248707	-2.23645	-0.875497
YPL081W	RPS9A	TFIID	18.1742	1859	-0.576851	0.183465	0.103071	-0.271033
YMR261C	TPS3	TFIID	18.1628	1860	-2.80431	-0.0368715	-2.24168	-1.5311
YLR414C	PUN1	CR	18.156	1861	-2.56398	-0.915401	-1.37836	-0.384464
YNL147W	LSM7	TFIID	18.1511	1862	-1.28439	0.0373534	-1.00115	-0.893304
YHL027W	RIM101	TFIID	18.147	1863	-1.27201	0.114168	-0.845012	-0.92601
YER172C	BRR2	TFIID	18.1412	1864	-1.6988	0.166055	-1.2651	-0.457414
YLR328W	NMA1	TFIID	18.136	1865	-1.56771	-0.424161	-1.41951	-0.57857
YNL050C	YNL050C	TFIID	18.1181	1866	-1.22096	0.319346	-1.28783	-0.237075
YNL051W	COG5	TFIID	18.1147	1867	-1.47946	0.156299	-1.75196	-0.683581
YNL288W	CAF40	TFIID	18.1125	1868	-1.55169	0.249128	-0.996897	-0.501167
YNL182C	IPI3	TFIID	18.1046	1869	-1.22097	0.238521	-0.806028	-0.0532492
YPL234C	VMA11	TFIID	18.0816	1870	-1.33223	0.133747	-0.98124	-0.623401
YOR273C	TPO4	CR	18.0769	1871	-5.70085	-1.40603	-2.94452	-1.68983
YBL097W	BRN1	TFIID	18.0754	1872	-2.24152	0.0286556	-0.489699	-0.443194
YNL238W	KEX2	TFIID	18.0684	1873	-1.50866	0.0523389	-1.3886	-0.808933
YDR098C	GRX3	TFIID	18.0661	1874	-0.763729	-0.153718	-1.31906	-0.499008
YLR096W	KIN2	TFIID	18.0634	1875	-1.83186	0.0697159	-1.41555	-0.668632
YOR119C	RIO1	TFIID	18.0559	1876	-1.12013	0.218881	-0.957059	-0.239602
YNL199C	GCR2	TFIID	18.0263	1877	-1.46185	0.247874	-1.23703	-0.602088
YJR062C	NTA1	TFIID	18.0232	1878	-1.59111	0.137355	-1.19717	-0.741768
YOR211C	MGM1	TFIID	18.0047	1879	-1.77575	0.277832	-1.26477	-0.810683
YFR041C	ERJ5	TFIID	17.9915	1880	-2.06503	-0.0508329	-1.58931	-0.729867
YFR031C	SMC2	TFIID	17.9897	1881	-1.48344	0.305855	-0.764364	-0.507043
YKR064W	OAF3	TFIID	17.964	1882	-1.34478	-0.0366553	-1.10429	-0.705089
YOR171C	LCB4	TFIID	17.9621	1883	-1.63542	0.281682	-1.48069	-0.891531
YIL047C	SYG1	TFIID	17.959	1884	-0.544856	-0.16137	-0.697335	-0.578706
YPL266W	DIM1	TFIID	17.959	1885	-0.528546	0.284144	-0.670138	-0.180674
YEL036C	ANP1	TFIID	17.9147	1886	-1.27124	0.159681	-1.11577	-0.714043
YMR071C	TVP18	TFIID	17.905	1887	-1.12625	-0.294332	-2.00375	-0.951527
YKL008C	LAC1	CR	17.9047	1888	-1.5436	-0.388303	-1.48809	-0.550355
YIL147C	SLN1	TFIID	17.9029	1889	-1.55865	0.190424	-0.877023	-0.557986
YLR095C	IOC2	TFIID	17.8996	1890	-1.78402	0.119961	-1.09351	-0.753167
YPL163C	SVS1	CR	17.899	1891	-2.00041	-0.499566	-2.17015	-0.509259
YLR367W	RPS22B	TFIID	17.8951	1892	-0.596666	0.161454	-0.847248	-0.530143
YNL330C	RPD3	TFIID	17.8936	1893	-1.62976	0.276581	-1.14449	-0.653331
YML071C	COG8	TFIID	17.8534	1894	-1.60478	0.45945	-1.12136	-0.432833
YBR234C	ARC40	TFIID	17.8396	1895	-2.02576	-0.016039	-1.4173	-0.984123
YHR181W	SVP26	TFIID	17.8347	1896	-1.51974	0.0598045	-1.50076	-0.717743
YMR296C	LCB1	TFIID	17.8249	1897	-1.67434	0.0123663	-1.26101	-0.702712
YLR073C	RFU1	TFIID	17.8247	1898	0.0752391	0.444439	-0.216751	0.314012
YPR034W	ARP7	TFIID	17.8155	1899	-1.43671	0.221938	-1.13411	-0.643119
YJL011C	RPC17	TFIID	17.8114	1900	-1.22852	0.274106	-1.06047	-0.00771973
YAR007C	RFA1	TFIID	17.8103	1901	-1.97701	-0.0340066	-1.47357	-0.828649
YNL062C	GCD10	TFIID	17.8065	1902	-0.795738	0.151762	-0.754577	-0.0248484
YGL129C	RSM23	TFIID	17.8065	1903	-1.47507	0.174407	-1.38433	-0.618936
YGL111W	NSA1	TFIID	17.8055	1904	-0.849543	0.398619	-0.799515	-0.152438
YLR278C	YLR278C	TFIID	17.8009	1905	-1.57663	-0.112999	-1.25358	-0.820761
YMR304W	UBP15	TFIID	17.7972	1906	-2.06173	-0.0199333	-1.44558	-0.877594
YGR063C	SPT4	TFIID	17.7957	1907	-1.09011	0.159652	-0.896484	-0.541682
YDR216W	ADR1	TFIID	17.7908	1908	-1.60585	-0.262921	-1.12574	-0.855693
YGL178W	MPT5	TFIID	17.7828	1909	-1.15693	0.110573	-1.15125	-0.912629
YHR165C	PRP8	TFIID	17.7755	1910	-1.45233	0.335085	-1.23666	-0.597769
YLR138W	NHA1	TFIID	17.7698	1911	-1.62224	0.0988576	-1.2355	-0.775917
YOL032W	OPI10	TFIID	17.7653	1912	-2.67598	0.432213	-2.1143	-0.846822
YMR117C	SPC24	TFIID	17.7475	1913	-2.14883	-0.109623	-0.839915	-0.474555
YBL040C	ERD2	TFIID	17.7456	1914	-1.59275	0.216214	-1.0837	-0.856814
YER111C	SWI4	TFIID	17.7417	1915	-1.88912	0.0992618	-1.01848	-0.660441
YLR454W	FMP27	TFIID	17.7315	1916	-1.91996	0.127636	-1.19713	-0.853395
YBR073W	RDH54	TFIID	17.7237	1917	-1.54288	0.0318657	-1.97121	-0.614444
YHR118C	ORC6	TFIID	17.7122	1918	-1.17745	-0.0262404	-1.21109	-0.400494
YLR120C	YPS1	TFIID	17.7089	1919	-1.95708	-0.480149	-1.35633	-0.860801
YOL013C	HRD1	TFIID	17.7086	1920	-1.77584	-0.0732038	-1.2793	-0.870758
YMR061W	RNA14	TFIID	17.7064	1921	-1.21846	0.316494	-0.499358	-0.547751
YHR146W	CRP1	TFIID	17.7003	1922	-1.56458	-0.142123	-1.22558	-0.481811
YBL107C	MIX23	TFIID	17.69	1923	-1.35483	0.0555809	-0.955036	-0.284798
YDR159W	SAC3	TFIID	17.6897	1924	-1.64251	0.239213	-1.04499	-0.677069
YCR065W	HCM1	CR	17.6646	1925	-1.87222	-0.155852	-0.992525	-0.700349
YGR147C	NAT2	TFIID	17.6598	1926	-1.06777	0.193259	-0.638078	-0.525443
YOR150W	MRPL23	TFIID	17.6528	1927	-1.61171	0.156877	-1.79798	-0.668369
YGL041W-A	YGL041W-A	TFIID	17.6472	1928	-1.05049	0.207467	-2.15685	-0.583526
YMR145C	NDE1	CR	17.6372	1929	-1.55044	-0.225692	-2.10318	-0.647146
YML100W	TSL1	CR	17.6368	1930	-5.43902	-1.23706	-3.35339	-2.84904
YCR069W	CPR4	TFIID	17.6327	1931	-1.76337	-0.0152229	-1.31797	-1.03877
YPL116W	HOS3	TFIID	17.6318	1932	-2.24605	-0.168237	-1.39605	-0.961989
YKL010C	UFD4	TFIID	17.6318	1933	-1.09644	0.184641	-0.917302	-0.5191
YBR015C	MNN2	TFIID	17.6314	1934	-1.63225	0.0606302	-1.22174	-0.78029
YCR107W	AAD3	TFIID	17.6289	1935	-2.11376	-0.216494	-0.468889	-1.22722
YJR143C	PMT4	TFIID	17.617	1936	-1.73529	0.104785	-1.20524	-0.710386
YPR073C	LTP1	TFIID	17.6076	1937	-1.06108	0.383657	-1.55479	-0.695355
YBL090W	MRP21	TFIID	17.6014	1938	-1.22374	0.239337	-1.10433	-0.667527
YMR016C	SOK2	TFIID	17.5999	1939	-1.3033	-0.126941	-1.03214	-0.911463
YNL111C	CYB5	TFIID	17.5978	1940	-1.44869	0.122962	-1.06531	0.153728
YGR081C	SLX9	TFIID	17.597	1941	-0.688183	0.285347	-0.184327	0.0992754
YBR095C	RXT2	TFIID	17.5843	1942	-1.57118	0.153193	-0.869737	-0.44882
YDR498C	SEC20	TFIID	17.5823	1943	-2.16766	0.110311	-1.05426	-0.817249
YPR141C	KAR3	TFIID	17.5822	1944	-1.8475	0.0133233	-0.816367	-0.437483
YNR013C	PHO91	TFIID	17.5486	1945	-1.93897	-0.0253719	-1.92584	-0.969098
YML125C	PGA3	TFIID	17.5476	1946	-1.57389	-0.240166	-1.74921	-0.509565
YGL049C	TIF4632	TFIID	17.544	1947	-2.00959	0.101797	-1.42809	-0.696322
YLR226W	BUR2	TFIID	17.5393	1948	-0.906732	-0.00832925	-1.03085	-0.460465
YCL001W	RER1	TFIID	17.5316	1949	-1.78351	0.258688	-1.48857	-0.75409
YPL203W	TPK2	TFIID	17.5303	1950	-3.06701	-0.146405	-2.28353	-1.46748
YHR200W	RPN10	TFIID	17.5253	1951	-1.46719	0.150347	-1.76455	-0.887559
YDR481C	PHO8	TFIID	17.509	1952	-2.30825	0.249507	-2.60787	-1.55946
YER029C	SMB1	TFIID	17.5073	1953	-1.64415	0.140409	-1.36028	-0.52021
YGL125W	MET13	CR	17.5066	1954	-0.805818	-0.159598	-0.446957	-0.677559
YDL236W	PHO13	TFIID	17.4899	1955	-1.476	0.242439	-1	-0.586685
YCL017C	NFS1	TFIID	17.4787	1956	-1.18359	-0.0474969	-1.08356	-0.763445
YKR074W	AIM29	TFIID	17.4653	1957	-1.36254	-0.0142364	-0.660121	-0.263971
YLR327C	TMA10	CR	17.4549	1958	-0.118696	-0.982688	-0.517367	-1.16545
YDL166C	FAP7	TFIID	17.4482	1959	-1.18682	0.119363	-1.4161	-0.434317
YBR023C	CHS3	TFIID	17.446	1960	-1.36682	0.07685	-1.06616	-0.67381
YHL038C	CBP2	TFIID	17.432	1961	-1.16903	0.0578848	-1.17601	-0.571469
YLR373C	VID22	TFIID	17.4062	1962	-2.41353	-0.0156797	-1.50647	-0.865128
YHR029C	YHI9	TFIID	17.4046	1963	-0.878316	-0.051477	-0.229132	-0.873075
YHL039W	EFM1	TFIID	17.3952	1964	-0.344352	0.149775	-1.0394	-0.426801
YDR093W	DNF2	TFIID	17.3952	1965	-1.81869	-0.0270107	-1.39955	-0.776014
YBL017C	PEP1	TFIID	17.3906	1966	-1.64756	0.0810912	-1.32884	-0.76259
YLR069C	MEF1	TFIID	17.3846	1967	-2.0116	0.222497	-1.49548	-0.822885
YHR056C	RSC30	TFIID	17.3592	1968	-1.99164	0.0109229	-1.19336	-0.849862
YNL207W	RIO2	TFIID	17.3476	1969	-0.854436	0.349857	-0.600838	-0.0284032
YJR054W	KCH1	TFIID	17.3373	1970	-1.50465	-0.0720531	-1.04242	-0.240987
YML110C	COQ5	TFIID	17.3325	1971	-1.9005	0.0102912	-1.86591	-0.831532
YGR136W	LSB1	CR	17.3196	1972	-2.0829	-0.0343621	-1.9873	-0.768313
YPR191W	QCR2	TFIID	17.3183	1973	-1.37282	0.364214	-1.52471	-1.02788
YGL073W	HSF1	TFIID	17.3169	1974	-1.44143	0.17513	-1.27321	-0.711489
YPL188W	POS5	TFIID	17.3117	1975	-0.540493	0.214918	-0.227613	-0.558443
YGR210C	YGR210C	TFIID	17.2984	1976	-1.12304	0.372057	-1.26138	-0.585219
YHR063C	PAN5	TFIID	17.2944	1977	-1.18929	0.253166	-1.41496	-0.585078
YML032C	RAD52	TFIID	17.2942	1978	-1.37969	0.0805947	-1.23266	-0.59959
YKR006C	MRPL13	TFIID	17.2927	1979	-1.23675	0.0986251	-1.42661	-0.729881
YDR012W	RPL4B	TFIID	17.2896	1980	-1.01734	0.094275	-0.669511	-0.674434
YNR006W	VPS27	TFIID	17.288	1981	-1.65675	-0.0662301	-1.53386	-0.882948
YOR230W	WTM1	CR	17.2828	1982	-2.2711	-0.4432	-2.32029	-1.03973
YLR419W	YLR419W	TFIID	17.2777	1983	-1.40654	0.166627	-0.827179	-0.322946
YCR043C	YCR043C	TFIID	17.2742	1984	-1.76257	-0.00944811	-1.74718	-0.705434
YJL072C	PSF2	TFIID	17.2733	1985	-0.759659	0.255267	-0.727209	-0.579504
YIL151C	ESL1	TFIID	17.2721	1986	-1.50029	0.370905	-1.06187	-0.5844
YOL062C	APM4	TFIID	17.2717	1987	-1.61916	0.0892758	-1.42151	-0.790621
YML081W	TDA9	TFIID	17.2617	1988	-1.56216	0.0871451	-0.63476	-0.502488
YIL063C	YRB2	TFIID	17.2448	1989	-1.65245	0.186724	-1.43283	-0.581137
YDR524C	AGE1	TFIID	17.2367	1990	-1.21155	0.568783	-0.92539	-0.404264
YKL023W	YKL023W	TFIID	17.2256	1991	-1.42775	0.0709147	-0.911963	-0.720054
YOR299W	BUD7	TFIID	17.2204	1992	-1.858	0.0449969	-1.14689	-0.710916
YPR115W	RGC1	TFIID	17.2078	1993	-2.13896	0.0204815	-1.59525	-0.917179
YDR244W	PEX5	TFIID	17.2059	1994	-1.76434	0.0143377	-1.02292	-0.755408
YIL008W	URM1	TFIID	17.1996	1995	-0.972582	0.325662	-0.732358	-0.00833127
YGL036W	YGL036W	TFIID	17.1906	1996	-2.17619	0.0928437	-1.42921	-0.945213
YDR531W	CAB1	TFIID	17.1879	1997	-0.764443	0.0200649	-0.631305	-0.688817
YBL005W	PDR3	TFIID	17.1851	1998	-1.80979	-0.268398	-1.6612	-0.762252
YPR055W	SEC8	TFIID	17.175	1999	-1.85887	0.109414	-1.45068	-0.891491
[truncated: 2,901 more rows]
