# Supplementary material for: Two roles for the yeast transcription coactivator SAGA and a set of genes redundantly regulated by TFIID and SAGA
Source: eLife. 2020 Jan 8;9:e50109. doi: 10.7554/eLife.50109 (PMC6977968; doi:10.7554/eLife.50109)
Supplement: Supplementary file 7. [file elife-50109-supp7.xlsx]

## Sheet: Supp File 7
gene_id	gene_name	gcn5_del	spt7_del	spt3_del	ubp8_del	Spt37_deg
YAL001C	TFC3	-3.92272	-3.29482	-1.97845	0.208627	-1.04984
YAL002W	VPS8	-4.34551	-3.82723	-1.78299	0.135609	-0.881847
YAL003W	EFB1	-5.80725	-4.88927	-1.56167	0.1504	-1.21269
YAL005C	SSA1	-4.94467	-4.80275	-1.56699	0.179304	-1.27559
YAL007C	ERP2	-3.66668	-3.37831	-1.97588	0.20786	-0.811945
YAL008W	FUN14	-3.37354	-2.37915	-1.33203	0.271504	-0.360379
YAL009W	SPO7	-3.20104	-2.31344	-1.28698	0.116446	-0.145918
YAL010C	MDM10	-3.19162	-2.37196	-1.39831	0.136323	-0.234189
YAL011W	SWC3	-3.17909	-2.54537	-1.51837	0.098907	0.119952
YAL012W	CYS3	-4.78401	-4.38859	-1.10363	-0.0391003	-1.4582
YAL013W	DEP1	-3.512	-2.81686	-1.29316	0.0588267	-0.473177
YAL014C	SYN8	-3.75455	-3.08479	-1.58424	0.0301932	-0.597455
YAL015C	NTG1	-3.3427	-2.50477	-1.20146	0.111313	-0.00411264
YAL016W	TPD3	-3.74982	-3.14525	-1.51334	0.326444	-0.40808
YAL017W	PSK1	-3.61412	-2.29757	-1.30459	0.271526	-0.705554
YAL018C	LDS1	-2.4417	-2.02647	-1.91462	0.419462	-0.55004
YAL019W	FUN30	-3.97211	-3.55318	-1.80083	0.26168	-0.387445
YAL020C	ATS1	-3.51471	-3.29512	-1.69101	0.177782	-0.457589
YAL021C	CCR4	-3.52137	-2.95913	-1.66595	0.193311	-0.578214
YAL022C	FUN26	-3.94202	-3.46818	-1.3932	-0.00307001	-0.557692
YAL023C	PMT2	-4.66548	-4.08556	-2.17834	0.252864	-1.18439
YAL024C	LTE1	-3.18136	-3.06009	-2.09193	0.416643	-0.428329
YAL025C	MAK16	-4.75298	-4.23795	-2.36443	0.357912	-1.28686
YAL026C	DRS2	-2.72968	-2.3812	-0.676785	0.111974	-0.24519
YAL027W	SAW1	-3.24601	-2.20799	-1.49729	0.366379	-0.18382
YAL028W	FRT2	-3.4684	-3.05855	-0.807446	-0.0627156	-0.987919
YAL029C	MYO4	-5.21233	-4.1306	-2.14963	-0.233101	-1.2717
YAL030W	SNC1	-3.27473	-2.56802	-1.51792	0.0309575	-0.293639
YAL031C	GIP4	-3.47305	-2.39228	-1.16148	0.0623719	-0.349034
YAL032C	PRP45	-3.17132	-2.73915	-1.44967	0.122554	-0.371775
YAL033W	POP5	-3.67387	-2.83797	-1.70721	0.110992	-0.351581
YAL034C	FUN19	-3.23127	-2.82889	-1.41711	0.223534	-0.403235
YAL034W-A	MTW1	-2.85912	-2.49957	-1.64961	0.319641	-0.317325
YAL035W	FUN12	-5.29725	-3.61747	-1.79794	0.438907	-0.862333
YAL036C	RBG1	-4.60359	-4.01141	-1.79655	0.434094	-0.964542
YAL037C-A	YAL037C-A	-3.3495	-2.15756	-1.61985	0.401913	-0.528456
YAL037W	YAL037W	-2.93178	-2.19657	-0.891753	0.47588	-0.429494
YAL038W	CDC19	-3.78697	-3.19058	-0.205394	0.271176	-0.683472
YAL039C	CYC3	-5.20072	-5.20257	-1.71695	0.0515475	-1.67804
YAL040C	CLN3	-4.9722	-3.66654	-1.24123	0.0766354	-0.881408
YAL041W	CDC24	-3.4609	-3.12529	-1.42237	0.272243	-0.60945
YAL042W	ERV46	-3.32058	-3.09934	-1.53281	0.0459391	-0.737415
YAL043C	PTA1	-3.11924	-2.92307	-1.49687	0.0477597	-0.609982
YAL044C	GCV3	-3.68704	-3.34405	-0.90141	0.316416	-0.99448
YAL044W-A	YAL044W-A	-2.95215	-2.12215	-0.967491	0.200167	-0.277858
YAL046C	AIM1	-3.1188	-2.20188	-1.04914	0.206643	-0.23272
YAL047C	SPC72	-3.03294	-2.28708	-1.37009	0.141309	-0.155787
YAL048C	GEM1	-3.17713	-2.36587	-1.18232	0.115582	-0.132205
YAL049C	AIM2	-3.34515	-2.57829	-2.98789	0.530265	-0.670822
YAL051W	OAF1	-4.26163	-3.7725	-1.8424	0.33152	-1.17051
YAL053W	FLC2	-4.51011	-4.58005	-1.68411	-0.101427	-1.48423
YAL054C	ACS1	-2.90292	-3.2152	-1.75848	-0.00205426	-0.672481
YAL055W	PEX22	-3.15049	-2.51934	-0.812927	0.172252	-0.641691
YAL056W	GPB2	-4.06365	-3.56118	-1.51284	-0.189995	-0.737571
YAL058W	CNE1	-3.27659	-2.6351	-1.23451	-0.0476547	-0.301389
YAL059W	ECM1	-5.13369	-3.91848	-2.02611	0.0140149	-0.855128
YAL060W	BDH1	-3.74115	-3.16234	-1.60827	-0.0601898	-0.61237
YAL061W	BDH2	-3.14821	-2.66273	-1.12674	0.323426	-0.531123
YAL062W	GDH3	-4.72238	-4.05455	-1.77203	-0.0139686	-1.29998
YAL063C	FLO9	-2.45173	-2.70697	-1.9035	0.29575	-1.18233
YAL063C-A	YAL063C-A	-2.65025	-1.79758	-1.13527	0.458316	-0.339451
YAL064C-A	TDA8	-2.38833	-2.39677	-1.48282	0.358888	-0.0375553
YAL064W	YAL064W	-2.46153	-2.62501	-1.21695	0.221049	-0.675179
YAL064W-B	YAL064W-B	-3.01936	-2.44028	-1.19146	0.116008	-0.159687
YAL065C	YAL065C	-3.01603	-2.44073	-1.19625	0.115378	-0.160936
YAL067C	SEO1	-2.74825	-2.08341	-1.36932	0.552598	-0.273507
YAL067W-A	YAL067W-A	-2.07446	-2.24603	-2.1863	0.194745	-0.129558
YAL068C	PAU8	-2.08785	-2.46408	-1.91978	0.386432	-0.0601548
YAR002C-A	ERP1	-3.9642	-3.23135	-1.65843	0.281509	-0.798377
YAR002W	NUP60	-4.08067	-3.55588	-1.97126	0.0814296	-0.921366
YAR003W	SWD1	-3.79672	-2.90562	-1.68718	0.215641	-0.506601
YAR007C	RFA1	-3.98149	-3.25883	-1.76444	0.516351	-1.25282
YAR008W	SEN34	-3.59566	-3.26791	-1.77723	0.653885	-1.32078
YAR009C	YAR009C	-2.77865	-2.70456	-0.978677	0.0737877	-0.152606
YAR010C	YAR010C	-4.46394	-3.92031	-1.66554	0.306889	-0.616209
YAR014C	BUD14	-4.03641	-3.77423	-1.32622	-0.0237407	-1.02073
YAR015W	ADE1	-3.78008	-3.58947	-1.22134	0.197241	-0.515769
YAR018C	KIN3	-4.00624	-3.3192	-1.31831	0.256568	-0.917097
YAR019C	CDC15	-2.81705	-2.72607	-1.3576	0.14878	-0.129943
YAR020C	PAU7	-2.97046	-2.57494	-1.97841	0.299267	-0.329675
YAR023C	YAR023C	-3.73217	-3.26654	-2.28955	0.0164651	-0.580108
YAR027W	UIP3	-3.85912	-3.13302	-1.67652	0.132638	-0.615637
YAR028W	YAR028W	-3.21277	-3.11744	-1.12357	-0.0568733	-0.770883
YAR029W	YAR029W	-2.61043	-2.68859	-1.92732	0.253142	-0.432493
YAR031W	PRM9	-3.57447	-2.97788	-1.92597	0.0928374	-0.464299
YAR033W	MST28	-3.40749	-2.72125	-1.55477	-0.0301937	-0.638254
YAR035C-A	YAR035C-A	-4.22961	-4.09293	-2.09467	0.556354	-1.24587
YAR035W	YAT1	-2.61034	-3.21624	-2.3958	1.10076	-0.773365
YAR042W	SWH1	-4.35012	-4.15229	-2.00232	0.356788	-1.17665
YAR050W	FLO1	-2.39856	-2.19945	-1.44278	0.740338	-0.0841273
YAR064W	YAR064W	-3.48187	-3.41271	-1.06508	0.169019	-1.06533
YAR066W	YAR066W	-2.75408	-2.38646	-0.394536	0.636244	-0.664235
YAR068W	YAR068W	-2.65628	-2.53012	-1.62251	0.49194	-0.222052
YAR071W	PHO11	-4.08954	-3.41499	-2.60022	0.463147	-0.453191
YBL001C	ECM15	-4.60084	-3.82456	-1.56094	0.0643571	-0.778531
YBL002W	HTB2	-4.68614	-3.66375	-1.47551	0.0928464	-0.704678
YBL003C	HTA2	-3.87802	-3.4532	-1.45781	0.338325	-0.648244
YBL004W	UTP20	-4.55699	-4.47269	-2.25389	0.388772	-1.48548
YBL005W	PDR3	-3.92322	-3.41293	-1.09397	0.243474	-1.09832
YBL005W-A	YBL005W-A	-4.46887	-4.57265	-1.21481	0.180704	-0.788785
YBL005W-B	YBL005W-B	-4.46887	-4.57265	-1.21481	0.180704	-0.788785
YBL006C	LDB7	-4.56748	-4.61729	-1.79887	0.28349	-1.19587
YBL007C	SLA1	-3.98496	-3.38687	-1.55228	0.122113	-0.837698
YBL008W	HIR1	-3.26349	-2.51472	-1.6082	0.172996	-0.0720541
YBL008W-A	YBL008W-A	-3.3104	-2.38237	-1.60524	0.292442	-0.326268
YBL009W	ALK2	-3.91524	-3.34797	-1.96468	0.273492	-0.921021
YBL010C	YBL010C	-4.12735	-3.25591	-1.64558	0.281226	-0.979112
YBL011W	SCT1	-4.60826	-3.93212	-1.64396	-0.0369315	-1.17846
YBL013W	FMT1	-4.28302	-3.75703	-2.32151	0.185852	-0.849642
YBL014C	RRN6	-3.55649	-3.02777	-1.45209	0.0794342	-0.0183755
YBL015W	ACH1	-3.36976	-3.35291	-0.432672	0.299737	-0.530472
YBL016W	FUS3	-4.51263	-4.00574	-1.08944	-0.0986017	-1.25301
YBL017C	PEP1	-4.82938	-3.49639	-1.60516	0.256822	-1.21781
YBL018C	POP8	-3.7016	-3.08051	-1.36396	0.49091	-0.610486
YBL019W	APN2	-3.18582	-2.17599	-1.56117	0.298244	-0.444225
YBL020W	RFT1	-3.81716	-2.99108	-1.43942	0.112079	-0.599059
YBL021C	HAP3	-3.78538	-3.38324	-1.47772	0.216378	-0.621374
YBL022C	PIM1	-4.35081	-3.59735	-1.7238	0.265436	-1.08199
YBL023C	MCM2	-3.26696	-2.87712	-1.78873	0.525297	-0.70964
YBL024W	NCL1	-4.74141	-3.76256	-1.94028	0.15454	-1.0435
YBL025W	RRN10	-4.44528	-3.52582	-2.08958	0.0919689	-0.681693
YBL026W	LSM2	-4.67549	-3.72795	-2.01334	0.201492	-1.09592
YBL027W	RPL19B	-6.16206	-5.6595	-2.90991	0.316	-1.99609
YBL028C	YBL028C	-5.76511	-5.36483	-2.5309	0.229289	-1.55945
YBL029C-A	YBL029C-A	-5.04615	-4.12758	-1.57325	0.368486	-1.33909
YBL029W	YBL029W	-4.87746	-4.70959	-2.45521	0.170016	-1.48136
YBL030C	PET9	-4.10561	-3.79352	-1.41171	0.363435	-1.07343
YBL031W	SHE1	-4.23885	-3.48898	-2.08575	0.165448	-1.03019
YBL032W	HEK2	-4.33449	-4.14208	-1.9999	0.110344	-1.25606
YBL033C	RIB1	-4.37305	-4.39386	-0.88223	0.0597372	-1.2605
YBL034C	STU1	-2.96344	-2.86905	-1.66288	0.157128	-0.0384358
YBL035C	POL12	-4.0088	-3.20909	-1.74229	0.215028	-0.804228
YBL036C	YBL036C	-3.75204	-3.19192	-1.75371	-0.0390906	-0.646758
YBL037W	APL3	-3.65803	-3.11381	-1.53425	0.302673	-0.537095
YBL038W	MRPL16	-3.83957	-3.50182	-1.50651	0.293985	-0.826045
YBL039C	URA7	-5.59833	-5.18705	-2.45561	0.447254	-1.32334
YBL039W-B	YBL039W-B	-3.53206	-3.18595	-1.73382	0.282647	-0.52647
YBL040C	ERD2	-3.42667	-3.32766	-1.80445	0.168317	-0.632787
YBL041W	PRE7	-5.37037	-5.26935	-2.02824	0.441829	-2.00001
YBL042C	FUI1	-5.29307	-4.59263	-1.02444	0.259518	-1.47983
YBL043W	ECM13	-3.52134	-3.36199	-1.83983	0.24802	-0.292659
YBL044W	YBL044W	-3.58448	-3.22746	-2.31052	0.254619	-1.15637
YBL045C	COR1	-4.13836	-3.73812	-1.89534	0.33309	-0.985936
YBL046W	PSY4	-3.54762	-3.0739	-1.66624	0.322639	-0.68131
YBL047C	EDE1	-3.61992	-3.19233	-1.63682	0.189734	-0.949381
YBL049W	MOH1	-2.95797	-2.3916	-0.976351	0.0727137	-0.549703
YBL050W	SEC17	-3.46176	-2.83448	-1.53905	0.239878	-0.468344
YBL051C	PIN4	-3.81696	-3.21979	-1.66246	0.322318	-0.927087
YBL052C	SAS3	-4.04195	-3.09287	-1.4612	0.0351172	-0.522507
YBL054W	TOD6	-5.12007	-4.77825	-2.08462	0.442494	-1.20028
YBL055C	YBL055C	-3.84617	-3.75757	-1.86082	0.251797	-0.754703
YBL056W	PTC3	-4.32955	-3.59579	-1.94406	0.125765	-0.719035
YBL057C	PTH2	-3.62526	-2.88554	-1.54445	0.262857	-0.462068
YBL058W	SHP1	-3.77534	-3.29237	-1.76603	0.303413	-0.888443
YBL059C-A	CMC2	-3.48001	-2.35056	-1.69725	0.0417762	-0.381125
YBL059W	YBL059W	-3.63934	-2.64736	-1.59241	0.0718787	-0.437175
YBL060W	YEL1	-4.17002	-3.6892	-1.37471	0.0105954	-0.579773
YBL061C	SKT5	-5.37254	-4.38102	-1.54491	0.16008	-1.26052
YBL063W	KIP1	-3.91704	-3.24795	-1.87538	0.349261	-0.829769
YBL064C	PRX1	-2.80306	-2.90585	-1.20325	0.669205	-1.02378
YBL066C	SEF1	-2.55283	-2.65113	-1.57281	0.848887	-0.53013
YBL067C	UBP13	-4.14287	-3.16132	-1.90351	0.103585	-0.578125
YBL068W	PRS4	-4.53869	-3.97789	-1.84456	0.233069	-0.730264
YBL069W	AST1	-4.91508	-3.84489	-2.12968	-0.16203	-1.04179
YBL071C-B	YBL071C-B	-5.67852	-5.8673	-2.36108	0.177096	-1.7872
YBL071W-A	KTI11	-4.95337	-4.3368	-2.2367	-0.0585704	-1.24242
YBL072C	RPS8A	-5.73513	-4.97237	-2.96982	0.150308	-1.52266
YBL074C	AAR2	-4.5244	-4.05075	-1.69168	0.134092	-0.919701
YBL075C	SSA3	-3.01657	-2.98875	-2.17593	0.324791	-0.831809
YBL076C	ILS1	-5.84346	-5.21641	-1.06318	0.22425	-1.78582
YBL078C	ATG8	-3.53437	-3.298	-1.79215	0.161499	-0.81004
YBL079W	NUP170	-3.88729	-3.3565	-1.85094	0.200851	-0.904288
YBL080C	PET112	-3.4773	-2.91282	-1.60025	0.291429	-0.598315
YBL081W	YBL081W	-4.73871	-3.74794	-1.87529	0.371625	-1.15387
YBL082C	ALG3	-3.75829	-3.16884	-1.72722	0.40089	-0.781723
YBL084C	CDC27	-3.14432	-3.31839	-1.62256	0.296471	-0.689332
YBL085W	BOI1	-4.90233	-3.93843	-2.09333	0.266038	-1.35288
YBL086C	YBL086C	-3.28086	-3.63696	-1.87103	0.511879	-0.714164
YBL087C	RPL23A	-6.1668	-6.00997	-2.66371	0.162051	-1.94045
YBL088C	TEL1	-3.71837	-2.92428	-1.51658	0.216233	-0.471041
YBL089W	AVT5	-3.4229	-2.9542	-1.82935	0.099089	-0.471947
YBL090W	MRP21	-4.17457	-3.09666	-1.83192	0.0586053	-0.650556
YBL091C	MAP2	-4.26353	-2.9044	-1.90649	-0.000788201	-0.661703
YBL091C-A	SCS22	-3.29053	-2.7382	-1.92089	0.189738	-0.179662
YBL092W	RPL32	-5.94158	-5.85714	-2.63865	0.248686	-1.92383
YBL093C	ROX3	-4.70167	-4.3217	-1.95998	-0.0312004	-1.19983
YBL095W	YBL095W	-4.3894	-4.38154	-1.97477	0.235495	-1.41339
YBL097W	BRN1	-3.91701	-3.44693	-1.93565	0.135379	-0.956074
YBL098W	BNA4	-3.56451	-2.90067	-2.16485	0.294964	-0.280948
YBL099W	ATP1	-5.00423	-4.01686	-1.97422	0.142991	-1.10825
YBL100W-A	YBL100W-A	-3.67593	-3.01389	-1.66855	0.40323	-0.452905
YBL100W-B	YBL100W-B	-3.67593	-3.01389	-1.66855	0.40323	-0.452905
YBL100W-C	YBL100W-C	-4.78983	-4.05606	-1.95234	0.288733	-1.46275
YBL101C	ECM21	-4.71501	-4.04178	-1.93341	0.283704	-1.44576
YBL102W	SFT2	-3.81103	-2.96101	-1.02121	0.0124667	-0.50587
YBL103C	RTG3	-3.95521	-3.37889	-1.17292	0.148062	-0.773145
YBL104C	SEA4	-3.31513	-2.45194	-1.40728	0.208515	-0.261323
YBL105C	PKC1	-3.52184	-2.9151	-1.55392	0.0624863	-0.41276
YBL106C	SRO77	-3.85624	-3.71926	-3.15816	0.440773	-1.37031
YBL107C	MIX23	-4.63707	-3.75054	-2.19314	0.299386	-0.868851
YBL108C-A	PAU9	-2.39406	-2.37917	-1.36795	0.0723111	-0.621458
YBL111C	YBL111C	-3.58924	-2.72824	-1.52171	0.540746	-0.768759
YBL112C	YBL112C	-2.37659	-2.32903	-1.04006	-0.0573497	-0.228557
YBL113C	YBL113C	-2.47319	-2.55729	-1.13604	0.0482459	-0.516358
YBR001C	NTH2	-3.17603	-2.62157	-1.33893	0.129741	-0.409551
YBR002C	RER2	-4.49564	-4.12607	-1.79486	0.121851	-1.14088
YBR003W	COQ1	-3.66954	-3.39905	-1.4032	0.143926	-0.623437
YBR004C	GPI18	-4.27665	-3.50946	-1.48118	-0.0291473	-1.20876
YBR005W	RCR1	-4.05284	-3.40901	-1.3704	0.0039746	-0.632909
YBR006W	UGA2	-3.62572	-3.3308	-1.27767	0.134191	-0.508383
YBR007C	DSF2	-4.88926	-4.45325	-1.93466	0.13881	-1.50516
YBR008C	FLR1	-3.76011	-3.24634	-1.30477	0.146122	-0.571121
YBR009C	HHF1	-3.6781	-3.33192	-1.61172	0.308497	-0.794018
YBR010W	HHT1	-3.37274	-2.70933	-1.65054	0.212807	-0.562057
YBR011C	IPP1	-4.85372	-4.61724	-1.74818	0.283283	-1.46017
YBR012W-A	YBR012W-A	-4.21567	-3.68281	-1.5932	0.101216	-0.476275
YBR012W-B	YBR012W-B	-4.21567	-3.68281	-1.5932	0.101216	-0.476275
YBR013C	YBR013C	-3.44678	-2.78493	-1.59279	0.127956	-0.35288
YBR014C	GRX7	-4.20784	-3.72941	-2.07903	0.321877	-1.12024
YBR015C	MNN2	-4.09149	-3.75565	-1.75135	0.281757	-1.10566
YBR016W	YBR016W	-3.99043	-3.64462	-1.58428	0.1838	-0.914713
YBR017C	KAP104	-3.89086	-3.96937	-1.7728	0.181715	-0.920936
YBR018C	GAL7	-2.82545	-2.61901	-1.06392	0.280234	-0.176563
YBR019C	GAL10	-2.56845	-2.94334	-1.61781	0.406607	-0.548709
YBR020W	GAL1	-3.19893	-1.93655	-1.96422	0.478687	-0.673479
YBR021W	FUR4	-4.96785	-4.08331	-1.414	0.0244926	-1.22376
YBR022W	POA1	-3.50058	-2.79248	-1.48829	0.246435	-0.438497
YBR023C	CHS3	-4.86422	-4.41925	-1.78818	0.0329229	-1.20392
YBR024W	SCO2	-3.38989	-3.02815	-1.36373	0.131376	-0.424649
YBR025C	OLA1	-5.11904	-4.56359	-1.80437	0.311746	-1.12593
YBR026C	ETR1	-3.71084	-2.90298	-1.65963	0.0329394	-0.415725
YBR028C	YPK3	-3.98091	-3.51079	-1.94328	0.173878	-0.767049
YBR029C	CDS1	-5.14075	-4.71665	-2.51088	0.36964	-1.43226
YBR030W	RKM3	-4.61153	-3.91005	-2.28384	0.237256	-1.42674
YBR031W	RPL4A	-4.7457	-4.59843	-2.07834	0.109574	-1.06763
YBR033W	EDS1	-2.57155	-2.48357	-0.574422	0.257694	-0.33412
YBR034C	HMT1	-5.22124	-4.61551	-1.80844	0.255833	-1.28439
YBR035C	PDX3	-4.1026	-3.46278	-1.07432	0.191944	-0.707911
YBR036C	CSG2	-3.79539	-3.36035	-1.44306	0.155662	-0.642814
YBR037C	SCO1	-3.71687	-3.44102	-1.58929	0.0605619	-0.803324
YBR038W	CHS2	-4.68234	-4.40956	-2.33115	0.258147	-0.651311
YBR039W	ATP3	-3.90263	-2.92082	-1.63832	0.0051449	-0.421378
YBR040W	FIG1	-3.79615	-2.79275	-2.21401	0.450475	-0.393038
YBR041W	FAT1	-3.61262	-2.87552	-1.87868	-0.0795369	-0.542673
YBR042C	CST26	-3.84207	-3.12341	-1.6733	0.279649	-0.888472
YBR043C	QDR3	-4.32139	-3.64858	-1.32096	0.0887495	-0.843811
YBR044C	TCM62	-4.08143	-3.63451	-1.45238	0.139403	-0.680556
YBR045C	GIP1	-3.2297	-3.14044	-1.85836	0.254522	-0.755977
YBR046C	ZTA1	-3.83723	-4.05741	-1.13396	0.118484	-0.828961
YBR047W	FMP23	-4.57737	-4.68624	-0.357898	-0.17941	-1.26789
YBR048W	RPS11B	-6.26669	-6.04742	-2.79539	0.376831	-2.29052
YBR049C	REB1	-4.68337	-4.36534	-2.01313	0.369494	-1.19322
YBR050C	REG2	-3.55804	-3.32655	-1.99621	-0.133574	-0.558272
YBR052C	RFS1	-3.88631	-3.18542	-1.59811	0.179519	-1.00148
YBR053C	YBR053C	-2.95681	-2.57033	-1.43311	0.555324	-0.47434
YBR054W	YRO2	-4.21068	-3.45778	-1.82913	0.647638	-0.901095
YBR055C	PRP6	-4.32873	-3.03643	-1.85002	0.0680786	-0.840647
YBR056W	YBR056W	-3.56503	-2.95445	-1.43381	0.11225	-0.917073
YBR056W-A	YBR056W-A	-3.8823	-3.15891	-1.55286	0.0410341	-0.797779
YBR057C	MUM2	-3.58383	-3.32139	-1.66818	0.0665005	-0.758747
YBR058C	UBP14	-3.47615	-2.75073	-1.71022	0.128109	-0.23717
YBR058C-A	TSC3	-4.34765	-3.12179	-1.76656	0.0942773	-0.689537
YBR059C	AKL1	-4.05191	-3.17429	-1.5421	-0.288525	-0.569166
YBR060C	ORC2	-4.28173	-3.62759	-1.46811	0.133254	-0.837515
YBR061C	TRM7	-3.94246	-2.79922	-1.68401	0.115911	-0.095686
YBR062C	YBR062C	-3.85442	-3.04844	-1.81334	0.075198	-0.671015
YBR063C	YBR063C	-2.97642	-2.99307	-1.69958	0.368166	-0.723383
YBR065C	ECM2	-3.99465	-3.37191	-1.4496	0.490863	-0.787451
YBR066C	NRG2	-4.75118	-4.86671	-1.35056	0.109415	-1.12776
YBR067C	TIP1	-4.28511	-4.01299	-1.00979	0.107055	-1.02288
YBR068C	BAP2	-4.4293	-3.90216	0.196287	0.393131	-0.678767
YBR069C	TAT1	-5.61398	-4.72713	-1.97041	0.146045	-1.16038
YBR070C	ALG14	-4.84583	-4.22124	-1.65614	0.335529	-1.15955
YBR071W	YBR071W	-4.21714	-3.75482	-0.888836	0.382197	-1.09939
YBR072C-A	YBR072C-A	-3.39967	-3.0982	-1.54785	0.348615	-0.561288
YBR072W	HSP26	-3.31205	-2.41563	-1.23231	0.669157	-0.46458
YBR073W	RDH54	-3.47683	-3.10641	-1.51783	0.126238	-0.516147
YBR074W	PFF1	-3.9757	-3.58039	-1.30149	0.10004	-0.720759
YBR076W	ECM8	-2.93422	-2.98242	-1.63924	0.346703	-0.40661
YBR077C	SLM4	-4.86527	-4.55587	-1.82804	0.214793	-1.4487
YBR078W	ECM33	-4.48194	-3.79501	-1.38801	0.262399	-1.11786
YBR079C	RPG1	-5.20146	-4.90404	-1.89713	0.39068	-1.33871
YBR080C	SEC18	-3.69175	-3.08075	-1.6516	0.14481	-0.699382
YBR081C	SPT7	-4.02292	-3.53309	-1.32313	0.145453	-0.517861
YBR082C	UBC4	-5.30714	-5.13835	-1.72129	0.143053	-1.6363
YBR083W	TEC1	-3.92088	-3.70906	-1.03647	0.36799	-1.12725
YBR084C-A	RPL19A	-6.16403	-5.95009	-2.73767	0.247042	-2.19395
YBR084W	MIS1	-4.87411	-4.38259	-2.00619	0.4631	-1.60682
YBR085C-A	YBR085C-A	-4.46982	-3.88828	-1.00733	0.25505	-1.33488
YBR085W	AAC3	-3.95365	-3.78268	-1.88376	0.311952	-0.900778
YBR086C	IST2	-5.25757	-4.57956	-2.35051	-0.0111231	-1.65634
YBR087W	RFC5	-4.92443	-4.02557	-2.08981	0.193642	-1.15605
YBR088C	POL30	-3.57708	-3.20772	-1.53008	0.407572	-1.13596
YBR089C-A	NHP6B	-5.02813	-3.93234	-1.95789	0.0738997	-1.36451
YBR090C	YBR090C	-4.17311	-4.09353	-1.88302	0.169732	-1.30315
YBR091C	TIM12	-3.9723	-3.83707	-1.72346	0.0075565	-1.19828
YBR092C	PHO3	-4.89981	-4.91298	-3.31548	-0.0579982	-0.964612
YBR093C	PHO5	-3.68277	-2.99097	-1.70789	-0.018587	-0.553324
YBR094W	PBY1	-4.44284	-3.86845	-2.21808	0.016992	-1.04585
YBR095C	RXT2	-4.02486	-3.17562	-1.48401	-0.0533257	-0.466138
YBR096W	YBR096W	-3.79465	-2.90819	-1.44844	0.162173	-0.715543
YBR097W	VPS15	-3.58872	-2.87427	-1.26476	-0.195742	-0.270089
YBR098W	MMS4	-3.55516	-2.68918	-1.78309	0.338674	-0.526225
YBR101C	FES1	-4.42168	-3.99599	-1.57301	0.36126	-0.996909
YBR102C	EXO84	-3.81586	-2.43667	-1.49125	0.14299	-0.486447
YBR103W	SIF2	-3.90143	-2.95712	-1.39082	0.113806	-0.627397
YBR104W	YMC2	-5.30807	-4.60508	-0.867845	0.0528611	-1.3187
YBR105C	VID24	-4.43606	-4.8022	-1.41301	0.0171373	-1.51419
YBR106W	PHO88	-5.25424	-4.90638	-1.48595	0.382469	-1.41837
YBR107C	IML3	-3.91055	-3.48353	-1.49966	0.133373	-1.10932
YBR108W	AIM3	-3.51996	-3.04466	-1.44012	-0.00839899	-0.683266
YBR109C	CMD1	-3.97272	-3.05211	-1.6961	0.107487	-0.914648
YBR110W	ALG1	-3.78066	-3.08693	-1.34149	0.203204	-0.911886
YBR111C	YSA1	-3.96015	-2.98863	-1.33907	0.0801618	-0.787557
YBR111W-A	SUS1	-4.25716	-3.1744	-1.57268	0.0711868	-0.759779
YBR112C	CYC8	-5.33677	-5.04622	-1.99674	0.0845225	-1.63949
YBR114W	RAD16	-4.16368	-4.17899	-1.97587	0.490363	-1.3592
YBR117C	TKL2	-3.47645	-3.60647	-1.74235	0.326492	-0.793294
YBR118W	TEF2	-5.60193	-5.48836	-1.9217	0.169848	-1.59795
YBR119W	MUD1	-4.52213	-3.19115	-1.89694	0.0633222	-0.714057
YBR120C	CBP6	-3.96784	-3.54035	-1.93982	0.105894	-0.803892
YBR121C	GRS1	-4.83307	-3.99403	-1.94201	0.215051	-1.2397
YBR122C	MRPL36	-4.07212	-3.16342	-1.91536	-0.010845	-0.626638
YBR123C	TFC1	-3.82376	-2.95951	-1.46624	0.120081	-0.645643
YBR125C	PTC4	-4.26444	-3.25909	-1.88719	0.0884245	-0.88058
YBR126C	TPS1	-3.79986	-3.88028	-1.49391	0.185138	-0.795611
YBR126W-A	YBR126W-A	-4.53994	-4.42287	-1.96065	0.319101	-1.01436
YBR127C	VMA2	-4.29343	-4.15865	-1.99819	0.314754	-1.04005
YBR128C	ATG14	-3.53293	-2.68524	-1.58354	0.0181198	-0.371907
YBR129C	OPY1	-3.7235	-3.20442	-1.61208	0.00287431	-0.635225
YBR130C	SHE3	-3.51988	-3.37736	-1.68495	0.127701	-0.813184
YBR131W	CCZ1	-3.61822	-3.15399	-1.36254	0.3557	-0.572439
YBR132C	AGP2	-3.97512	-3.31918	-1.50538	0.167074	-1.50015
YBR133C	HSL7	-4.79061	-4.52726	-2.11699	0.123165	-1.62714
YBR135W	CKS1	-4.07726	-3.7357	-1.68644	0.340589	-0.97081
YBR136W	MEC1	-3.01065	-2.2748	-1.42969	0.245399	-0.50963
YBR137W	YBR137W	-3.7969	-3.00077	-1.55691	0.334451	-0.41025
YBR138C	YBR138C	-4.24537	-3.69165	-1.70639	0.0122136	-1.05151
YBR139W	YBR139W	-3.88678	-3.04538	-1.56665	0.237884	-1.24471
YBR140C	IRA1	-3.71136	-2.98932	-1.54986	0.0367511	-0.652331
YBR141C	BMT2	-4.3481	-3.54538	-1.78969	0.245861	-0.624911
YBR142W	MAK5	-4.57857	-3.91982	-2.01822	0.311219	-0.81255
YBR143C	SUP45	-5.22103	-4.8234	-1.95618	0.42679	-1.56135
YBR145W	ADH5	-4.21699	-3.78167	-0.91232	0.0726938	-0.726625
YBR146W	MRPS9	-3.302	-2.92365	-1.37507	0.147911	-0.705508
YBR147W	RTC2	-3.03894	-2.8918	-0.686287	0.436199	-0.376079
YBR148W	YSW1	-3.25391	-2.64239	-2.46469	0.884912	-0.461669
YBR149W	ARA1	-3.54728	-3.009	-1.28066	-0.0607374	-0.766611
YBR150C	TBS1	-4.04029	-3.71458	-1.83102	0.172219	-1.02143
YBR151W	APD1	-4.02283	-3.09344	-1.58535	0.17211	-0.714609
YBR152W	SPP381	-4.08411	-2.83914	-1.42167	0.194681	-0.425172
YBR153W	RIB7	-4.28429	-3.92956	-0.911912	-0.0536557	-0.836167
YBR154C	RPB5	-5.23955	-4.32667	-1.76662	0.401242	-1.07067
YBR155W	CNS1	-4.64439	-4.03124	-1.6794	0.0770906	-0.877899
YBR156C	SLI15	-3.6073	-3.11484	-1.81945	0.287405	-0.685284
YBR157C	ICS2	-4.6244	-3.72412	-1.07954	-0.17133	-0.914987
YBR158W	AMN1	-4.351	-2.99958	-1.19336	0.213065	-0.866615
YBR159W	IFA38	-3.94661	-3.79648	-1.59737	0.20997	-0.728737
YBR160W	CDC28	-4.65472	-3.82666	-1.95839	0.115718	-1.1232
YBR161W	CSH1	-4.37383	-3.82842	-1.8427	0.449831	-1.1412
YBR162C	TOS1	-5.36178	-4.55467	-1.79635	-0.11343	-1.30481
YBR162W-A	YSY6	-5.36479	-5.14215	-1.88499	0.0193824	-1.76695
YBR163W	EXO5	-3.85438	-3.17287	-1.51666	-0.00616721	-1.02222
YBR164C	ARL1	-4.07988	-3.10838	-1.84296	0.077935	-0.842989
YBR165W	UBS1	-4.21357	-3.29379	-1.59381	0.0797452	-0.446397
YBR166C	TYR1	-3.75297	-2.93593	-1.42506	0.141102	-0.499345
YBR167C	POP7	-4.10073	-2.74423	-1.37735	0.0504408	-0.547289
YBR168W	PEX32	-3.58751	-2.74936	-1.67849	0.00217567	-0.365545
YBR169C	SSE2	-3.47524	-2.53123	-1.47746	0.220546	-0.630945
YBR170C	NPL4	-3.85812	-3.79002	-1.71756	0.194646	-1.09162
YBR171W	SEC66	-3.84131	-3.2645	-1.63184	0.0716402	-1.06287
YBR172C	SMY2	-4.76868	-4.36757	-1.96353	0.319404	-1.00671
YBR173C	UMP1	-4.13081	-3.60016	-2.03833	0.296142	-0.688287
YBR175W	SWD3	-3.76343	-3.32816	-1.72107	0.292962	-0.497526
YBR176W	ECM31	-3.68102	-3.46479	-1.75723	0.20435	-0.652365
YBR177C	EHT1	-5.33278	-5.31652	-3.1402	0.109675	-1.5311
YBR179C	FZO1	-3.45288	-3.37183	-1.3336	-0.0362754	-0.831645
YBR180W	DTR1	-3.51165	-3.42217	-2.07824	0.236522	-0.404944
YBR181C	RPS6B	-6.19907	-6.03248	-2.5362	0.308805	-2.10014
YBR182C	SMP1	-3.36433	-2.55904	-1.76629	0.423253	-0.963035
YBR182C-A	YBR182C-A	-3.92644	-3.70486	-2.16936	0.452989	-1.70378
YBR183W	YPC1	-4.28268	-4.02982	-1.98702	0.354133	-1.63687
YBR184W	YBR184W	-3.79128	-4.08404	-2.0592	0.216261	-1.03369
YBR185C	MBA1	-3.76237	-2.9255	-1.6421	-0.073814	-0.368504
YBR186W	PCH2	-3.19493	-2.5015	-1.83768	0.145585	-0.214802
YBR187W	GDT1	-5.26448	-4.90039	-2.32398	0.109875	-1.34881
YBR188C	NTC20	-4.08209	-3.43959	-1.97985	0.208232	-0.77556
YBR189W	RPS9B	-6.61219	-6.04252	-3.05136	0.259392	-2.14061
YBR191W	RPL21A	-6.10146	-5.72838	-2.65206	0.312549	-1.8302
YBR192W	RIM2	-4.1599	-3.31823	-2.14582	0.272898	-0.814725
YBR193C	MED8	-3.67359	-3.14851	-1.75757	0.105599	-0.400432
YBR194W	AIM4	-4.5196	-2.7989	-1.696	0.0574832	-0.542925
YBR195C	MSI1	-4.02911	-3.54975	-1.82937	0.285985	-0.771074
YBR196C	PGI1	-5.3845	-4.57559	-1.16974	0.042451	-1.34296
YBR196C-A	YBR196C-A	-5.45049	-4.92855	-1.24433	0.504532	-1.60385
YBR196C-B	YBR196C-B	-6.41542	-6.27629	-1.82476	0.373491	-1.88963
YBR197C	YBR197C	-5.31456	-4.63892	-1.59891	0.0762539	-1.03401
YBR198C	TAF5	-3.88292	-3.14532	-1.57663	0.0846883	-0.661682
YBR199W	KTR4	-3.89347	-3.59632	-1.40533	-0.0342399	-0.718712
YBR200W	BEM1	-3.95667	-3.3077	-1.57252	0.229016	-0.499161
YBR200W-A	YBR200W-A	-3.11235	-2.80137	-1.79265	-0.0661363	-0.931035
YBR201C-A	YBR201C-A	-3.69924	-3.60039	-1.5017	0.251146	-1.0214
YBR201W	DER1	-3.08501	-2.77121	-1.38943	0.30332	-0.883882
YBR202W	MCM7	-4.67981	-4.74215	-2.09849	0.200935	-1.31708
YBR203W	COS111	-2.79965	-3.17142	-1.75509	0.366941	-0.898289
YBR204C	LDH1	-3.51605	-2.86527	-1.44247	-0.0190316	-0.765293
YBR205W	KTR3	-3.79807	-3.46359	-1.36163	0.0202296	-0.825672
YBR207W	FTH1	-4.65571	-3.78238	-1.56622	0.230211	-1.4887
YBR208C	DUR1,2	-4.33385	-3.78103	-1.28089	-0.135033	-0.52158
YBR210W	ERV15	-3.49198	-3.03634	-1.56121	0.0329802	-0.428878
YBR211C	AME1	-3.39419	-2.88939	-1.38721	0.0344608	-0.658112
YBR212W	NGR1	-4.13927	-3.20637	-1.62943	0.0341482	-1.05535
YBR213W	MET8	-4.25366	-3.58953	-1.35199	0.17252	-0.539803
YBR214W	SDS24	-3.28201	-3.32522	-1.16913	0.0152733	-0.741748
YBR215W	HPC2	-3.16535	-2.43279	-1.28849	0.23519	-0.736878
YBR216C	YBP1	-3.57297	-2.7312	-1.43443	0.141615	-0.269682
YBR217W	ATG12	-3.63053	-2.79846	-1.49599	0.0868623	-0.154696
YBR218C	PYC2	-4.52682	-3.97708	-0.920524	0.00716686	-1.09536
YBR219C	YBR219C	-2.29869	-2.41242	-0.743949	0.264665	-0.0326407
YBR220C	YBR220C	-4.08463	-3.68242	-1.93502	0.428171	-0.906822
YBR221C	PDB1	-4.7812	-4.07402	-1.0704	0.151697	-1.26812
YBR221W-A	YBR221W-A	-4.91749	-4.21027	-1.2842	0.228123	-1.37619
YBR222C	PCS60	-3.31347	-3.38986	-1.20602	0.252062	-0.67826
YBR223C	TDP1	-3.59976	-2.87553	-1.26201	0.0072146	-0.511128
YBR225W	YBR225W	-3.47024	-2.79869	-1.33327	0.114576	-0.759478
YBR227C	MCX1	-3.80054	-2.65628	-1.35565	0.0753262	-0.327795
YBR228W	SLX1	-3.72319	-2.9479	-1.409	0.0305504	-0.258597
YBR229C	ROT2	-3.15173	-2.44088	-1.10842	0.158944	-0.375528
YBR230C	OM14	-3.10099	-2.90259	-1.39707	0.616063	-0.467411
YBR230W-A	YBR230W-A	-3.68447	-3.49593	-1.85314	0.344781	-0.601608
YBR231C	SWC5	-4.60753	-3.9755	-1.8202	0.201056	-0.901113
YBR233W	PBP2	-3.78407	-3.47003	-1.65232	0.222471	-1.0734
YBR233W-A	DAD3	-3.53009	-3.00002	-1.55786	0.190451	-0.492588
YBR234C	ARC40	-3.65118	-2.79005	-1.72382	-0.000464338	-0.614194
YBR235W	VHC1	-3.69541	-2.66324	-1.63263	-0.10178	-0.692919
YBR236C	ABD1	-3.50575	-3.02402	-1.35208	0.147889	-0.294367
YBR237W	PRP5	-3.77261	-2.85529	-1.43695	0.239354	-0.269161
YBR238C	YBR238C	-4.78098	-4.40807	-1.78272	0.332292	-1.33647
YBR239C	ERT1	-3.92112	-3.12911	-1.43731	0.346688	-1.08426
YBR240C	THI2	-2.62583	-2.37362	-1.32638	0.569683	-0.587023
YBR241C	YBR241C	-3.32535	-2.89968	-1.32979	0.340823	-0.369285
YBR242W	YBR242W	-4.29251	-3.25224	-1.80222	-0.104762	-0.738026
YBR243C	ALG7	-3.76059	-2.9497	-1.97252	0.125001	-0.432726
YBR244W	GPX2	-3.81168	-3.09962	-1.73531	0.0875215	-0.535024
YBR245C	ISW1	-4.23714	-3.03907	-1.90682	0.105892	-0.577807
YBR246W	RRT2	-3.75144	-3.0645	-1.87424	0.22604	-0.410829
YBR247C	ENP1	-5.01046	-4.46801	-2.21874	0.356742	-1.02783
YBR248C	HIS7	-4.46568	-3.75374	-0.641069	-0.170549	-0.813456
YBR249C	ARO4	-5.0955	-4.02954	-1.33981	0.0542958	-1.08294
YBR250W	SPO23	-2.81347	-2.06907	-1.28209	0.675225	-0.336673
YBR251W	MRPS5	-3.79347	-2.93507	-1.57033	0.0918788	-0.558329
YBR252W	DUT1	-3.31501	-3.12341	-1.70765	0.104893	-0.297446
YBR253W	SRB6	-3.21096	-2.72162	-1.53794	0.188503	-0.279502
YBR254C	TRS20	-3.55824	-2.84904	-1.60365	0.116082	-0.318696
YBR255C-A	YBR255C-A	-3.78868	-3.16495	-1.69093	0.395435	-0.843809
YBR255W	MTC4	-3.43275	-2.55272	-1.47711	-0.000328044	-0.307934
YBR256C	RIB5	-4.21252	-3.5601	-0.247072	0.0223169	-0.719254
YBR257W	POP4	-3.81907	-3.22221	-1.79412	0.140048	-0.698208
YBR258C	SHG1	-4.2416	-2.77398	-1.54558	0.0990462	-0.520712
YBR259W	YBR259W	-3.91547	-2.87142	-1.51237	0.003264	-0.317201
YBR260C	RGD1	-3.26469	-2.65791	-1.64652	0.0495889	-0.436725
YBR261C	TAE1	-3.07615	-2.63232	-1.57915	0.103772	-0.37882
YBR262C	MIC12	-3.75371	-2.94441	-1.43447	0.0943754	-0.489122
YBR263W	SHM1	-3.7339	-2.99729	-1.59733	0.200582	-0.46913
YBR264C	YPT10	-3.88408	-3.31232	-1.43683	0.0340576	-0.764652
YBR265W	TSC10	-4.08923	-3.29865	-1.70299	0.14389	-0.77234
YBR267W	REI1	-4.73388	-4.12064	-2.19126	0.214633	-0.972335
YBR268W	MRPL37	-3.67059	-3.18009	-1.77205	0.0673558	-0.545172
YBR269C	SDH8	-3.73052	-3.21285	-1.48609	0.104844	-0.56826
YBR270C	BIT2	-3.98523	-3.39667	-1.79964	0.293882	-0.633508
YBR271W	EFM2	-3.72766	-2.97606	-1.79359	0.424746	-0.471248
YBR272C	HSM3	-3.36361	-2.5361	-1.48103	0.0595821	-0.263207
YBR273C	UBX7	-3.30682	-2.68648	-1.51194	0.158982	-0.310996
YBR274W	CHK1	-3.37522	-2.6731	-1.58969	0.0467782	-0.29595
YBR275C	RIF1	-3.38249	-3.00124	-1.76159	0.00887322	-0.190189
YBR276C	PPS1	-3.63939	-2.51895	-1.52075	0.231393	-0.303455
YBR278W	DPB3	-3.97696	-2.83127	-1.69853	0.236822	-0.371
YBR279W	PAF1	-4.73266	-4.07292	-1.77797	-0.0574579	-1.00437
YBR280C	SAF1	-3.70554	-2.69598	-1.26715	-0.155724	-0.285274
YBR281C	DUG2	-3.62233	-2.85957	-1.84497	-0.0277892	-0.977965
YBR282W	MRPL27	-3.52616	-2.93284	-1.60163	0.199738	-0.473625
YBR283C	SSH1	-4.99909	-4.25096	-2.29386	0.237915	-1.45006
YBR284W	YBR284W	-3.54885	-3.10769	-1.92294	0.541682	-0.660704
YBR285W	YBR285W	-3.40237	-2.48421	-1.72366	0.0820271	-0.582066
YBR286W	APE3	-4.39453	-2.99836	-1.56857	0.0200825	-0.939582
YBR287W	YBR287W	-4.29097	-3.65194	-1.68007	-0.0966902	-0.89139
YBR288C	APM3	-3.35245	-2.75887	-1.63878	0.116504	-0.613403
YBR289W	SNF5	-3.15948	-2.70132	-1.53435	0.138936	-0.571353
YBR290W	BSD2	-4.20384	-3.06279	-1.78853	0.234673	-0.580171
YBR291C	CTP1	-4.11842	-3.40714	-1.6802	0.125847	-0.717477
YBR293W	VBA2	-3.60711	-2.84857	-1.36033	-0.0971218	-0.53264
YBR294W	SUL1	-2.96807	-2.90917	0.0534565	-0.234184	-0.232914
YBR295W	PCA1	-4.00079	-3.69679	-1.20602	0.117249	-1.23889
YBR296C	PHO89	-3.87572	-3.53889	-1.76322	-0.515575	-0.86725
YBR296C-A	YBR296C-A	-3.42591	-3.43955	0.175005	-0.501096	-0.473285
YBR297W	MAL33	-2.93312	-2.6323	0.0179398	-0.0601375	-1.16843
YBR298C	MAL31	-2.68332	-2.30278	-0.969282	0.428319	-0.354242
YBR298C-A	YBR298C-A	-2.75415	-2.14332	-1.02851	0.0406715	-0.718104
YBR299W	MAL32	-2.86069	-2.59607	-1.20531	0.24599	-0.715321
YBR301W	PAU24	-2.75834	-2.06797	-1.76391	0.0932056	-0.344655
YBR302C	COS2	-3.04067	-2.77633	-1.85414	-0.00201119	-0.72347
YCL001W	RER1	-4.25084	-3.54953	-1.90795	0.237586	-0.985085
YCL001W-A	YCL001W-A	-3.12711	-2.37289	-1.58319	0.284847	-0.354707
YCL001W-B	YCL001W-B	-3.94152	-2.89714	-1.97417	0.293188	-0.546405
YCL002C	YCL002C	-4.3279	-3.68419	-2.08092	0.177425	-0.817206
YCL004W	PGS1	-3.34075	-2.89506	-1.64411	0.0566648	-0.224673
YCL005W	LDB16	-3.69171	-3.58114	-1.69502	0.123239	-0.658265
YCL005W-A	VMA9	-4.09474	-3.20397	-1.7273	0.0589436	-0.794444
YCL008C	STP22	-3.86478	-3.35554	-1.57053	0.101992	-0.604059
YCL009C	ILV6	-4.11489	-3.90138	-0.56589	0.0683659	-0.598896
YCL010C	SGF29	-4.05327	-3.691	-2.1247	0.293673	-0.967993
YCL011C	GBP2	-4.48457	-4.29977	-1.94695	0.0854001	-0.85198
YCL012C	YCL012C	-3.66562	-3.52938	-1.92937	0.255899	-0.639234
YCL014W	BUD3	-3.63996	-3.18129	-1.41856	0.0909088	-0.725694
YCL016C	DCC1	-3.23296	-2.7279	-1.17807	0.119707	-0.360654
YCL017C	NFS1	-3.20951	-2.63685	-1.48011	0.261599	-0.330071
YCL019W	YCL019W	-3.7559	-3.21622	-1.66851	0.161284	-0.342605
YCL020W	YCL020W	-3.7559	-3.21622	-1.66851	0.161284	-0.342605
YCL021W-A	YCL021W-A	-2.89938	-2.35209	-2.2216	0.287904	-0.2595
YCL024W	KCC4	-3.57745	-3.64069	-1.44399	0.520806	-1.28828
YCL025C	AGP1	-4.34811	-3.64221	-1.09206	0.277783	-1.14074
YCL026C-A	FRM2	-3.16812	-2.58281	-1.68468	0.291479	-0.468376
YCL026C-B	HBN1	-3.36082	-3.00647	-1.70171	0.630124	-0.741819
YCL027W	FUS1	-4.30963	-3.67196	-1.65165	0.348494	-0.634871
YCL028W	RNQ1	-3.20844	-2.45031	-1.05491	0.151468	-0.224353
YCL029C	BIK1	-3.04866	-2.52388	-0.938368	0.119956	-0.242146
YCL030C	HIS4	-3.56426	-2.92627	-0.379035	-0.0846057	-0.429912
YCL031C	RRP7	-4.30571	-3.81368	-1.72362	0.459688	-0.886013
YCL032W	STE50	-3.07071	-2.43927	-1.34022	0.0727964	-0.231007
YCL033C	MXR2	-2.98567	-2.57736	-1.38181	0.110375	-0.0891223
YCL034W	LSB5	-3.24295	-2.59666	-1.23334	0.0800169	-0.471387
YCL035C	GRX1	-3.90075	-2.99956	-1.44766	0.0504854	-0.426122
YCL036W	GFD2	-4.7682	-4.66406	-2.04191	0.531689	-1.08047
YCL037C	SRO9	-5.78678	-5.17215	-2.31214	0.448113	-1.57288
YCL038C	ATG22	-3.32269	-2.94237	-1.36377	0.178143	-0.914516
YCL039W	GID7	-3.02741	-2.55095	-1.2989	0.0705963	-0.631555
YCL040W	GLK1	-3.26036	-3.82441	-0.876481	0.329848	-1.19846
YCL042W	YCL042W	-4.8421	-4.84349	-2.08338	0.15939	-1.72061
YCL043C	PDI1	-4.93649	-4.72222	-1.96497	0.278969	-1.65036
YCL044C	MGR1	-3.75812	-3.63629	-1.53549	0.0812417	-0.737563
YCL045C	EMC1	-2.93645	-2.60931	-1.56631	0.232237	-0.367532
YCL047C	POF1	-3.2883	-2.78004	-1.49677	0.101489	-0.353724
YCL048W	SPS22	-3.06506	-2.34633	-1.84478	0.181471	-0.763277
YCL048W-A	YCL048W-A	-2.63221	-2.34193	-1.37321	0.417832	-0.62829
YCL049C	YCL049C	-3.20402	-2.62931	-1.46439	0.319377	-0.511957
YCL050C	APA1	-4.60803	-3.93025	-1.45013	0.0530929	-0.979718
YCL051W	LRE1	-3.3138	-2.55033	-1.40267	0.180921	-0.537369
YCL052C	PBN1	-3.17708	-2.53298	-1.27455	0.191061	-0.363218
YCL054W	SPB1	-3.89564	-2.9126	-1.73455	0.631188	-1.00855
YCL054W-A	RDT1	-3.43315	-3.00112	-2.02179	-0.302059	-0.369985
YCL055W	KAR4	-3.43541	-2.8893	-1.51385	0.16095	-0.668129
YCL056C	PEX34	-3.40955	-2.61929	-1.3709	0.142096	-0.550583
YCL057C-A	MIC10	-3.17544	-3.33868	-1.59115	0.304125	-0.662886
YCL057W	PRD1	-3.75098	-3.9619	-1.75769	0.145697	-1.134
YCL058C	FYV5	-3.73224	-3.60254	-1.80987	0.153957	-0.543321
YCL058W-A	ADF1	-4.99364	-4.03113	-1.89394	0.062862	-0.886177
YCL059C	KRR1	-4.52596	-3.6937	-1.72356	0.288492	-0.967152
YCL061C	MRC1	-2.88678	-2.6313	-1.75606	0.202666	-0.359837
YCL063W	VAC17	-3.70939	-3.65333	-1.74627	0.298404	-1.04553
YCL064C	CHA1	-3.16197	-3.48081	-0.66801	-0.302925	-0.714305
YCL066W	HMLALPHA1	-4.73233	-3.49485	-1.39246	-0.0222042	-0.978945
YCL067C	HMLALPHA2	-4.47821	-3.14385	-1.41413	-0.115218	-0.939342
YCL068C	YCL068C	-3.55627	-2.65415	-1.46431	0.114802	-0.266425
YCL069W	VBA3	-2.69858	-3.17698	-1.72222	-0.267249	-0.711931
YCL073C	GEX1	-2.87809	-2.73942	-1.43327	0.549512	-0.728387
YCR002C	CDC10	-3.38967	-3.00808	-1.53069	0.254469	-0.62117
YCR003W	MRPL32	-3.62376	-3.13078	-1.48336	-0.00914433	-0.403061
YCR004C	YCP4	-4.33564	-3.39018	-1.38867	0.0904491	-0.888588
YCR005C	CIT2	-3.66395	-3.08335	0.550332	0.690322	-0.0324458
YCR007C	YCR007C	-4.05484	-3.2985	-1.57479	0.056394	-0.585116
YCR008W	SAT4	-5.00845	-4.50485	-2.00054	-0.117214	-1.44665
YCR009C	RVS161	-4.36284	-3.55241	-1.5354	0.25663	-0.952412
YCR010C	ADY2	-2.67355	-2.48717	-1.40129	0.298681	-0.412604
YCR011C	ADP1	-4.94288	-4.55212	-1.57579	0.0722751	-1.34047
YCR012W	PGK1	-4.47858	-3.97589	-1.01263	0.267672	-0.871064
YCR014C	POL4	-3.02431	-2.03823	-1.02485	0.613214	-0.235919
YCR015C	YCR015C	-4.38585	-3.64013	-1.54895	0.0843	-0.676393
YCR016W	YCR016W	-4.1804	-3.38497	-1.5475	0.300338	-0.67342
YCR017C	CWH43	-3.80549	-3.60106	-0.873563	-0.0814857	-0.964648
YCR018C	SRD1	-4.79546	-4.21439	-0.363571	-0.345762	-0.748007
YCR019W	MAK32	-3.64516	-2.72015	-1.48005	0.0436268	-0.287755
YCR020C	PET18	-3.45083	-2.91338	-1.45543	0.270216	-0.444689
YCR020C-A	MAK31	-3.54365	-3.15926	-1.44644	0.287918	-0.775331
YCR020W-B	HTL1	-4.38304	-3.56336	-1.69963	0.173936	-1.00886
YCR021C	HSP30	-3.66038	-2.98088	-1.78111	0.227436	-0.573048
YCR023C	YCR023C	-4.00692	-3.36043	-1.1008	0.162888	-0.764469
YCR024C	SLM5	-3.44596	-2.81339	-1.0329	0.180872	-0.54997
YCR024C-A	PMP1	-4.36242	-3.33594	-0.96495	0.316802	-0.925373
YCR024C-B	YCR024C-B	-3.72035	-3.03989	-0.635424	0.109031	-0.621153
YCR026C	NPP1	-3.94862	-3.47689	-1.48502	0.25659	-0.520768
YCR027C	RHB1	-3.8688	-3.4896	-1.83255	0.101653	-0.660977
YCR028C	FEN2	-3.41256	-2.84614	-1.65586	0.0913869	-0.598397
YCR028C-A	RIM1	-3.70506	-3.47606	-1.55225	0.157389	-0.768423
YCR030C	SYP1	-3.74486	-3.17396	-1.8151	0.32794	-0.949389
YCR031C	RPS14A	-6.04164	-5.13754	-2.75027	0.287316	-1.97941
YCR032W	BPH1	-4.07576	-3.27723	-1.79992	0.0353656	-0.718684
YCR033W	SNT1	-4.16617	-3.60284	-2.05397	0.539805	-1.07994
YCR034W	ELO2	-5.17552	-4.86486	-2.46189	0.458414	-1.57668
YCR035C	RRP43	-3.86373	-3.84263	-1.66663	0.233233	-0.844538
YCR036W	RBK1	-4.1926	-3.6717	-1.37885	0.351037	-0.873856
YCR037C	PHO87	-4.81511	-4.09528	-2.24159	0.0979664	-0.907694
YCR038C	BUD5	-3.69211	-2.88706	-1.32381	0.193622	-0.520043
YCR039C	MATALPHA2	-3.86074	-2.99194	-1.65272	0.415019	-0.570359
YCR040W	MATALPHA1	-4.77113	-3.45174	-1.62043	-0.00315796	-0.801339
YCR041W	YCR041W	-4.16173	-3.76064	-1.85327	0.196681	-0.952302
YCR042C	TAF2	-3.26949	-2.75558	-1.48131	0.214665	-0.358209
YCR043C	YCR043C	-4.18147	-3.68956	-2.13899	0.137983	-1.07902
YCR044C	PER1	-3.46588	-3.15642	-1.5737	0.085501	-0.682655
YCR045C	RRT12	-2.96864	-3.20116	-1.61807	0.494962	-0.254134
YCR046C	IMG1	-3.51061	-3.02541	-1.47834	0.111507	-0.473063
YCR047C	BUD23	-4.36569	-3.96857	-1.97787	0.300963	-0.473667
YCR048W	ARE1	-3.8148	-3.78837	-1.14459	0.0776374	-0.78198
YCR050C	YCR050C	-3.29887	-3.19228	-1.70595	0.0450166	-0.0535603
YCR051W	YCR051W	-3.69845	-3.42079	-1.43737	0.13848	-0.548358
YCR052W	RSC6	-3.68529	-2.93039	-1.33047	0.187653	-0.471331
YCR053W	THR4	-4.47746	-3.94802	-1.03691	0.0174072	-1.0932
YCR054C	CTR86	-3.96307	-3.13744	-1.59533	0.0948135	-0.557951
YCR057C	PWP2	-4.58731	-4.6208	-1.71356	0.439394	-1.21457
YCR059C	YIH1	-3.70403	-3.14783	-1.4106	0.121847	-0.525326
YCR060W	TAH1	-3.67809	-3.55485	-1.27565	0.164588	-0.677614
YCR061W	YCR061W	-4.1741	-4.74447	-2.44902	0.199907	-1.1661
YCR063W	BUD31	-5.10704	-4.94933	-2.13886	0.271411	-1.55103
YCR065W	HCM1	-4.59103	-4.20205	-1.22525	0.281105	-1.56268
YCR066W	RAD18	-2.76885	-2.49364	-1.32181	-0.0274199	-0.187405
YCR067C	SED4	-3.76586	-2.87508	-1.77545	0.231544	-0.758877
YCR068W	ATG15	-3.62167	-2.85793	-1.35938	0.216829	-0.592068
YCR069W	CPR4	-3.61556	-3.6019	-2.06331	0.108207	-0.512351
YCR071C	IMG2	-3.3206	-2.81452	-1.57668	-0.0336183	-0.500045
YCR072C	RSA4	-4.70778	-3.93884	-2.03881	0.288659	-1.12908
YCR073C	SSK22	-3.22986	-2.99771	-1.48815	0.578021	-0.84634
YCR073W-A	SOL2	-2.82364	-2.92969	-1.30567	0.189986	-0.540149
YCR075C	ERS1	-3.12177	-2.78547	-1.58841	0.186407	-0.249706
YCR075W-A	YCR075W-A	-3.27296	-2.80608	-1.69846	0.0286038	-0.504556
YCR076C	FUB1	-2.85545	-2.39116	-1.24718	0.0605781	-0.227298
YCR077C	PAT1	-3.57631	-3.18972	-1.45289	0.130369	-0.840248
YCR079W	PTC6	-3.14283	-2.90844	-1.48984	0.223314	-0.626891
YCR081W	SRB8	-3.36322	-2.63151	-1.11836	0.0296412	-0.219044
YCR082W	AHC2	-3.8117	-3.32567	-2.35551	0.61191	-1.04594
YCR083W	TRX3	-2.73007	-2.18395	-1.42484	0.313399	-0.262452
YCR084C	TUP1	-4.35269	-3.92837	-2.11203	0.297845	-1.16339
YCR086W	CSM1	-3.91926	-2.93918	-1.77836	0.387439	-0.740153
YCR087C-A	YCR087C-A	-4.43248	-3.91748	-1.84599	0.098553	-0.764
YCR088W	ABP1	-3.82013	-3.52455	-1.84315	0.0885969	-0.858189
YCR089W	FIG2	-4.02014	-3.28502	-1.41189	-0.0465419	-0.869142
YCR090C	YCR090C	-3.82797	-2.73057	-1.94055	0.114336	-0.784752
YCR091W	KIN82	-2.89795	-2.41802	-1.27679	0.433161	-0.296464
YCR092C	MSH3	-3.47888	-3.2861	-1.86155	0.102638	-0.69458
YCR093W	CDC39	-4.92424	-4.11594	-2.11388	0.576031	-1.68758
YCR094W	CDC50	-3.03687	-2.31365	-1.69011	0.212965	-0.289771
YCR095C	OCA4	-3.48514	-2.54171	-1.40716	0.255464	-0.281959
YCR095W-A	YCR095W-A	-4.04387	-2.6988	-1.50325	0.0190904	-0.453618
YCR096C	HMRA2	-3.02813	-2.49475	-1.68355	0.419286	-0.405813
YCR097W	HMRA1	-1.75349	-2.31245	-1.99618	0.568685	-0.405116
YCR098C	GIT1	-3.15325	-2.4001	-1.55445	0.50152	-0.386727
YCR099C	YCR099C	-3.09448	-2.95273	-1.35823	0.00441322	-0.406758
YCR100C	YCR100C	-2.8211	-2.48322	-1.82372	0.111631	0.0326733
YCR101C	YCR101C	-3.5385	-2.81683	-1.26858	-0.197031	-0.185798
YCR102C	YCR102C	-3.19005	-3.30555	-1.4224	0.145844	-0.321617
YCR104W	PAU3	-2.1173	-2.70997	-1.56602	0.869324	-0.718448
YCR105W	ADH7	-3.15044	-2.65931	-1.58438	0.259598	-0.301544
YCR106W	RDS1	-3.32023	-3.18052	-1.83573	-0.0796315	-0.613206
YCR107W	AAD3	-2.72988	-3.05516	-1.03525	0.0633281	-0.492415
YDL001W	RMD1	-4.50305	-3.71777	-1.88711	0.131459	-0.834369
YDL002C	NHP10	-4.5571	-3.70879	-2.05639	0.105276	-0.971538
YDL003W	MCD1	-3.54659	-3.25691	-1.21551	0.498451	-0.885859
YDL004W	ATP16	-3.99585	-3.44455	-1.48414	0.108188	-0.692332
YDL005C	MED2	-3.54895	-3.16261	-1.94036	0.304165	-0.796649
YDL006W	PTC1	-3.63286	-3.01806	-1.7561	0.218517	-0.683192
YDL007C-A	YDL007C-A	-2.53531	-2.30002	-2.16817	0.401017	-0.135425
YDL007W	RPT2	-5.25803	-3.96975	-2.11914	0.451324	-1.41236
YDL008W	APC11	-3.76141	-3.37027	-1.96236	0.13776	-0.693102
YDL009C	YDL009C	-3.94962	-3.20161	-1.97912	0.0729923	-0.667753
YDL010W	GRX6	-4.35839	-4.03372	-1.70159	0.036998	-1.4092
YDL012C	YDL012C	-3.86453	-3.44901	-1.37761	0.0908037	-0.758141
YDL013W	SLX5	-4.02421	-3.19736	-1.61197	0.0586541	-0.554809
YDL014W	NOP1	-6.19814	-5.9176	-2.52117	0.290199	-1.60846
YDL015C	TSC13	-5.01452	-4.14275	-1.91563	0.0652001	-1.24367
YDL017W	CDC7	-3.70527	-2.79847	-1.42783	0.0725435	-0.608293
YDL018C	ERP3	-3.89822	-3.06796	-1.65646	0.268675	-0.832712
YDL019C	OSH2	-3.69138	-2.96266	-1.37758	0.103455	-0.61731
YDL020C	RPN4	-4.67614	-3.93358	-1.11666	0.27477	-1.06974
YDL021W	GPM2	-3.90806	-2.97453	-1.17199	0.177305	-0.633035
YDL022C-A	YDL022C-A	-2.95028	-1.96155	-1.66379	0.309911	-0.245328
YDL022W	GPD1	-4.73473	-4.38021	-1.64051	0.312134	-1.43433
YDL024C	DIA3	-2.73638	-1.88771	-1.53638	0.46892	-0.232322
YDL025C	RTK1	-3.99108	-3.20456	-0.943839	-0.131435	-0.729957
YDL027C	YDL027C	-3.89363	-2.75171	-1.79035	0.320723	-0.656444
YDL028C	MPS1	-3.48761	-2.74433	-1.31885	0.340261	-0.454686
YDL029W	ARP2	-3.50996	-3.15586	-1.91826	0.188587	-0.606166
YDL030W	PRP9	-3.65689	-2.86032	-1.54206	0.284229	-0.466485
YDL031W	DBP10	-3.73669	-3.093	-1.89791	0.237253	-0.514723
YDL033C	SLM3	-3.84302	-3.5792	-1.77082	0.317753	-0.536416
YDL035C	GPR1	-4.32132	-3.36828	-1.37233	0.0253638	-1.28812
YDL036C	PUS9	-4.1555	-3.018	-1.95773	0.152798	-0.807542
YDL037C	BSC1	-4.28304	-3.99921	-2.51869	0.672711	-0.193183
YDL039C	PRM7	-2.27047	-2.51187	-1.28298	-0.0618906	-0.279142
YDL040C	NAT1	-4.29344	-3.30085	-1.74808	0.101734	-0.871852
YDL042C	SIR2	-4.23323	-3.80129	-1.80121	0.225279	-0.706193
YDL043C	PRP11	-3.54486	-2.74914	-1.77039	0.105311	-0.536177
YDL044C	MTF2	-3.55815	-2.40148	-1.20401	-0.0053439	-0.287494
YDL045C	FAD1	-3.56116	-2.70024	-1.78184	0.269895	-0.310437
YDL045W-A	MRP10	-3.53052	-2.83494	-1.45143	0.162017	-0.759417
YDL046W	NPC2	-4.37345	-3.76654	-1.56519	-0.0458692	-0.948681
YDL047W	SIT4	-5.50356	-4.22147	-1.98326	0.244754	-1.18199
YDL048C	STP4	-3.95009	-3.47836	-1.41295	0.466923	-0.9054
YDL049C	KNH1	-4.75107	-4.37748	-2.21523	0.48285	-1.26214
YDL051W	LHP1	-5.54604	-4.61347	-1.85622	0.329246	-1.2404
YDL052C	SLC1	-5.01418	-4.25364	-1.78116	0.0971971	-1.13684
YDL053C	PBP4	-4.0627	-3.18756	-1.43916	-0.177654	-0.756993
YDL054C	MCH1	-3.80271	-2.88653	-0.423734	-0.0335391	-0.865091
YDL055C	PSA1	-4.0026	-3.46636	-0.73738	0.138043	-0.785969
YDL056W	MBP1	-3.59304	-3.20902	-1.64623	0.203185	-0.756888
YDL057W	YDL057W	-3.72223	-2.59666	-1.77104	0.230532	-0.340469
YDL058W	USO1	-3.40043	-2.8693	-1.54536	0.175518	-0.520896
YDL059C	RAD59	-3.27273	-2.7375	-1.35456	0.196259	-0.27386
YDL060W	TSR1	-4.9385	-4.37327	-2.20225	0.0950765	-1.00368
YDL061C	RPS29B	-6.66632	-5.93656	-2.79233	0.204585	-1.92325
YDL063C	SYO1	-4.39612	-3.6772	-2.33388	0.422916	-0.950334
YDL064W	UBC9	-3.87109	-2.9077	-1.75029	0.00660057	-0.608362
YDL065C	PEX19	-3.62714	-2.66782	-1.70255	0.0431694	-0.6035
YDL066W	IDP1	-3.69267	-3.41275	-0.98154	0.144758	-0.674568
YDL067C	COX9	-4.28417	-3.46271	-1.11094	0.0731145	-0.840157
YDL069C	CBS1	-3.29352	-2.56951	-1.46077	0.0968646	-0.311331
YDL070W	BDF2	-4.94006	-4.9355	-2.18806	0.392897	-1.92904
YDL072C	YET3	-4.72062	-4.56321	-1.57602	0.348681	-1.34776
YDL073W	YDL073W	-3.35558	-2.7612	-1.53261	0.273255	-0.443973
YDL074C	BRE1	-3.96757	-3.2565	-1.93783	0.20628	-0.920824
YDL075W	RPL31A	-6.66761	-5.91599	-2.87636	0.211785	-2.04495
YDL076C	RXT3	-4.46005	-3.73392	-2.15099	0.0289266	-0.949963
YDL077C	VAM6	-3.86439	-3.0502	-1.86729	-0.127278	-0.522852
YDL078C	MDH3	-3.43904	-3.05555	-1.56795	0.150624	-0.78405
YDL079C	MRK1	-2.83782	-2.42745	-1.27793	0.173632	-0.689959
YDL080C	THI3	-4.38944	-3.32188	-1.80642	0.171906	-0.984789
YDL081C	RPP1A	-5.88932	-5.12126	-2.85167	0.127261	-1.4669
YDL082W	RPL13A	-5.96898	-5.5098	-2.58202	0.341542	-1.91638
YDL083C	RPS16B	-6.00924	-5.56864	-2.70154	0.382395	-1.84768
YDL084W	SUB2	-4.76691	-4.52527	-2.14581	0.256074	-1.29267
YDL085C-A	YDL085C-A	-4.06403	-3.58181	-2.15865	0.239027	-0.797044
YDL085W	NDE2	-3.25652	-2.84799	-1.50146	0.346054	-0.644417
YDL086W	YDL086W	-3.51038	-2.96614	-1.42826	-0.0391072	-0.545327
YDL087C	LUC7	-3.6287	-2.82302	-1.44682	0.154462	-0.289818
YDL088C	ASM4	-4.08292	-3.8148	-1.93725	0.0903449	-0.885402
YDL089W	NUR1	-3.71877	-2.80928	-1.58472	0.102104	-0.130525
YDL090C	RAM1	-3.81528	-2.83574	-1.63701	0.0872283	-0.134268
YDL091C	UBX3	-3.08132	-2.23114	-1.57682	0.269529	-0.466481
YDL092W	SRP14	-3.74981	-3.02638	-1.60828	0.00381419	-0.642189
YDL093W	PMT5	-3.66942	-3.31983	-1.53322	0.124238	-0.98239
YDL095W	PMT1	-4.74856	-4.43375	-2.2296	0.253993	-1.40596
YDL097C	RPN6	-5.09335	-4.31003	-2.06127	0.541658	-1.76345
YDL098C	SNU23	-3.59092	-2.47045	-1.79004	0.114263	-0.244559
YDL099W	BUG1	-4.28313	-3.14563	-1.57896	0.065509	-0.792904
YDL100C	GET3	-3.64317	-3.24392	-1.70012	0.126169	-1.13623
YDL101C	DUN1	-3.84769	-3.31419	-1.85841	0.119177	-1.05568
YDL102W	POL3	-3.50964	-2.81423	-1.51662	0.0421577	-0.19852
YDL103C	QRI1	-3.28783	-2.59614	-1.48347	0.197148	-0.278259
YDL104C	QRI7	-3.57244	-2.5557	-1.4328	0.0743561	-0.149325
YDL105W	NSE4	-3.78082	-2.759	-1.7059	0.351081	-0.644867
YDL106C	PHO2	-3.18791	-2.58865	-1.54313	0.0262801	-0.530349
YDL107W	MSS2	-3.21958	-2.31155	-1.51713	0.201626	-0.326543
YDL108W	KIN28	-3.75493	-2.55533	-1.52229	0.120789	-0.539398
YDL109C	YDL109C	-3.5802	-2.827	-1.58745	-0.0252542	-0.338925
YDL110C	TMA17	-3.51276	-3.25365	-2.39537	0.295174	-0.411494
YDL111C	RRP42	-3.97502	-3.68778	-1.84924	0.179511	-0.867641
YDL112W	TRM3	-3.6578	-3.27417	-1.5782	0.252961	-0.745863
YDL113C	ATG20	-3.53381	-2.83676	-1.4672	0.0656549	-0.324358
YDL114W	YDL114W	-2.77425	-2.62549	-1.54848	0.2801	0.0571779
YDL115C	IWR1	-3.69349	-3.42174	-1.46044	0.105741	-0.538614
YDL116W	NUP84	-4.11655	-3.57147	-1.81552	0.14823	-0.742489
YDL117W	CYK3	-4.38484	-3.51307	-1.83147	0.239911	-0.98183
YDL119C	YDL119C	-3.69417	-2.90894	-1.45231	0.114228	-0.507697
YDL120W	YFH1	-3.84437	-3.12102	-1.33048	0.232464	-0.603679
YDL121C	YDL121C	-3.80658	-3.14257	-1.43035	0.13198	-0.729328
YDL122W	UBP1	-5.15216	-3.95333	-1.97359	-0.0703409	-0.973974
YDL123W	SNA4	-3.61717	-2.96455	-1.43175	-0.00423165	-0.74116
YDL124W	YDL124W	-3.94338	-4.21024	-1.66469	0.0191694	-1.29051
YDL125C	HNT1	-4.56702	-4.12221	-2.00671	0.274455	-1.40028
YDL126C	CDC48	-5.07997	-4.61945	-2.34133	0.438461	-1.6329
YDL127W	PCL2	-4.50661	-4.15488	-1.67989	0.290632	-1.18753
YDL128W	VCX1	-4.9037	-4.36638	-2.05574	0.201386	-1.15059
YDL129W	YDL129W	-3.95629	-3.99799	-1.98902	0.360158	-0.892991
YDL130W	RPP1B	-6.51084	-6.23025	-2.95202	0.0667882	-2.17111
YDL130W-A	STF1	-3.81051	-3.63802	-1.57615	0.174217	-0.841696
YDL131W	LYS21	-4.83627	-4.24794	-1.47912	0.0196004	-0.962725
YDL132W	CDC53	-4.18083	-3.72121	-1.8586	0.0328245	-1.25052
YDL133C-A	RPL41B	-5.98632	-5.07715	-2.5478	0.230814	-1.89463
YDL133W	SRF1	-4.17334	-4.19702	-1.55902	0.189847	-1.53847
YDL134C	PPH21	-4.47906	-4.53043	-2.4471	0.21035	-1.62301
YDL135C	RDI1	-4.51252	-3.51654	-1.95463	0.12496	-1.03542
YDL136W	RPL35B	-6.28773	-5.94759	-2.85803	0.294632	-1.84475
YDL137W	ARF2	-4.6088	-4.23185	-1.98285	0.185744	-1.40532
YDL138W	RGT2	-4.34112	-3.83306	-1.34381	0.180278	-1.05984
YDL139C	SCM3	-4.25511	-3.25373	-1.644	0.232128	-0.682601
YDL140C	RPO21	-5.36298	-4.62224	-2.59719	0.49526	-1.74138
YDL141W	BPL1	-4.16661	-2.82866	-1.43076	-0.0308036	-0.439062
YDL142C	CRD1	-4.04563	-3.07138	-1.47692	0.00441777	-0.501797
YDL143W	CCT4	-4.3895	-3.82516	-1.90356	0.48424	-0.848162
YDL144C	YDL144C	-3.93753	-3.16444	-1.48738	0.284255	-0.793912
YDL145C	COP1	-3.83996	-2.97691	-1.86568	0.498777	-1.04735
YDL146W	LDB17	-4.22367	-2.93798	-1.83482	0.216101	-0.950498
YDL147W	RPN5	-5.46724	-5.15711	-2.72	0.513594	-2.02735
YDL148C	NOP14	-4.23049	-3.60677	-2.0115	0.347986	-0.806329
YDL149W	ATG9	-2.93812	-2.33494	-1.54728	0.104769	-0.575906
YDL150W	RPC53	-4.51024	-3.78804	-1.85152	0.206994	-0.780955
YDL153C	SAS10	-4.45465	-3.49679	-1.84148	0.17458	-0.554297
YDL154W	MSH5	-2.42881	-2.45515	-2.01324	0.879387	-0.323318
YDL155W	CLB3	-4.59732	-3.98879	-2.29153	0.306512	-0.988035
YDL156W	CMR1	-4.10378	-3.39195	-1.43528	-0.218266	-1.01851
YDL157C	YDL157C	-4.11941	-2.76311	-1.55393	0.162239	-0.857997
YDL159W	STE7	-3.29699	-2.68607	-1.71199	0.53773	-0.371432
YDL159W-A	YDL159W-A	-4.39436	-3.68624	-1.9177	0.248215	-1.33846
YDL160C	DHH1	-4.34937	-3.64226	-1.91498	0.262642	-1.31598
YDL160C-A	MHF2	-3.36212	-3.22311	-1.84732	0.0552202	-0.443191
YDL161W	ENT1	-3.28897	-2.7892	-1.5776	0.452017	-0.626257
YDL164C	CDC9	-3.55774	-3.14286	-1.91257	0.451563	-0.950151
YDL165W	CDC36	-3.9065	-2.76403	-1.55199	0.0355283	-0.284383
YDL166C	FAP7	-4.10146	-2.94998	-1.49921	0.0925292	-0.512787
YDL167C	NRP1	-4.49868	-4.23482	-1.77525	0.472349	-0.978408
YDL168W	SFA1	-3.31111	-3.04722	-1.26277	0.145279	-0.574627
YDL169C	UGX2	-2.92612	-2.56446	-1.57038	0.505985	-0.3266
YDL170W	UGA3	-4.08867	-3.82151	-0.564075	-0.0169022	-1.33495
YDL171C	GLT1	-5.30238	-4.36877	-1.72362	-0.141315	-1.52104
YDL173W	PAR32	-3.6609	-3.55214	-1.10543	0.211973	-0.652614
YDL174C	DLD1	-3.64804	-3.52914	-1.5636	0.0730577	-0.428991
YDL175C	AIR2	-3.94088	-3.49465	-1.56868	0.347645	-0.689614
YDL176W	YDL176W	-4.111	-3.46019	-1.53002	0.0984105	-0.581873
YDL177C	YDL177C	-4.2703	-3.33725	-1.39967	0.0386655	-0.829149
YDL178W	DLD2	-4.17422	-3.11663	-1.84612	-0.0283023	-0.600868
YDL179W	PCL9	-4.23156	-3.71513	-2.0608	0.37962	-0.842532
YDL180W	YDL180W	-4.39001	-3.88158	-1.10644	0.015048	-1.02432
YDL181W	INH1	-3.94235	-3.75425	-1.02015	0.0243159	-0.890144
YDL182W	LYS20	-4.78316	-4.59892	-0.932976	0.400586	-1.28062
YDL183C	YDL183C	-3.98944	-3.68953	-1.11182	0.118184	-0.364323
YDL184C	RPL41A	-5.65946	-5.32675	-2.73577	0.229437	-1.74808
YDL185W	VMA1	-5.46409	-4.48834	-2.34151	0.194936	-1.58812
YDL186W	YDL186W	-2.47632	-2.84402	-1.84192	0.452589	-0.22891
YDL188C	PPH22	-4.17217	-3.10901	-1.60685	0.247641	-1.17291
YDL189W	RBS1	-4.36867	-3.41317	-1.98203	0.000950954	-0.676975
YDL190C	UFD2	-3.59467	-2.97796	-1.67944	0.121098	-0.720351
YDL191W	RPL35A	-6.12778	-6.13186	-2.76302	0.13877	-2.02082
YDL192W	ARF1	-5.75766	-5.15836	-2.6598	0.164446	-1.69053
YDL193W	NUS1	-3.55307	-2.52629	-1.44538	0.480153	-0.647879
YDL194W	SNF3	-2.89945	-2.51946	-1.60828	0.490394	-0.747203
YDL195W	SEC31	-3.9833	-3.83354	-1.69458	0.211108	-1.16401
YDL197C	ASF2	-3.66085	-3.11235	-1.61552	0.179428	-1.03166
YDL198C	GGC1	-4.46711	-4.26588	-0.78113	0.122092	-1.24687
YDL199C	YDL199C	-3.49992	-2.95573	-0.92891	0.238655	-0.520759
YDL200C	MGT1	-3.66163	-2.50826	-1.56998	0.0274044	-0.667984
YDL201W	TRM8	-4.95661	-4.01721	-1.91238	0.335159	-1.04273
YDL202W	MRPL11	-3.86809	-2.71053	-1.5327	0.196124	-0.695259
YDL203C	ACK1	-3.62527	-2.94997	-1.52599	0.280193	-0.765595
YDL204W	RTN2	-3.44788	-3.25571	-1.38715	0.2162	-0.38373
YDL205C	HEM3	-4.7173	-3.67403	-1.82045	0.127649	-1.03975
YDL206W	YDL206W	-3.3399	-2.4121	-1.9573	0.366429	-0.337441
YDL207W	GLE1	-3.48616	-3.07198	-1.7175	-0.0918353	-0.332781
YDL208W	NHP2	-5.77153	-4.52995	-1.94595	0.211089	-1.12421
YDL209C	CWC2	-3.8661	-3.28745	-1.80436	0.298203	-0.48241
YDL210W	UGA4	-2.93415	-2.468	-1.36032	0.252915	-0.400883
YDL211C	YDL211C	-3.36645	-3.07638	-1.99928	0.281581	-0.727165
YDL212W	SHR3	-3.93692	-3.1819	-1.69377	0.156232	-0.814439
YDL213C	NOP6	-4.34723	-3.4141	-1.71331	0.0818566	-0.858444
YDL214C	PRR2	-2.6817	-2.98802	-1.60642	0.266369	-0.455826
YDL215C	GDH2	-4.40168	-4.14207	-1.02347	0.134662	-1.413
YDL216C	RRI1	-3.41138	-2.9648	-1.7285	0.289662	-0.649341
YDL217C	TIM22	-3.52552	-2.8496	-1.57499	0.210784	-0.544483
YDL218W	YDL218W	-3.16326	-3.07767	-2.36436	0.440187	-0.633998
YDL219W	DTD1	-3.72469	-3.04096	-1.91483	0.448255	-0.792545
YDL220C	CDC13	-3.44593	-2.78206	-1.80435	0.368191	-0.485237
YDL222C	FMP45	-3.36962	-3.20386	-1.57097	-0.00234704	-1.21279
YDL223C	HBT1	-2.4259	-1.58689	-0.914806	0.934649	-0.603985
YDL224C	WHI4	-4.35485	-3.1346	-2.09099	0.330869	-0.819415
YDL225W	SHS1	-3.63641	-2.7919	-1.49982	-0.0502096	-0.537722
YDL226C	GCS1	-3.61828	-2.81755	-1.54614	0.0530057	-0.441642
YDL227C	HO	-3.55736	-3.40466	-1.94576	0.415808	-0.814276
YDL229W	SSB1	-5.80892	-5.68248	-2.00617	0.31198	-1.50517
YDL230W	PTP1	-3.75239	-3.65247	-1.75379	0.248633	-0.711457
YDL231C	BRE4	-4.00794	-3.80144	-1.54608	0.161668	-0.814933
YDL232W	OST4	-3.5119	-3.06675	-1.99627	0.129697	-0.751092
YDL233W	MFG1	-2.75934	-2.78375	-1.26643	0.152636	-0.294404
YDL234C	GYP7	-3.18743	-2.78241	-1.32677	0.0877535	-0.297841
YDL235C	YPD1	-4.08868	-3.38579	-1.79857	0.225177	-0.939171
YDL236W	PHO13	-4.34555	-3.60628	-1.78792	0.190396	-0.635084
YDL237W	AIM6	-3.12127	-2.45293	-1.5108	0.161212	-0.455655
YDL238C	GUD1	-3.19348	-2.4026	-1.55817	0.0127815	-0.247294
YDL239C	ADY3	-3.1714	-2.63677	-2.22221	0.252085	-0.238683
YDL240W	LRG1	-4.10425	-3.5383	-1.65077	0.124842	-0.896391
YDL241W	YDL241W	-3.76185	-3.15804	-0.906339	-0.234507	-0.925309
YDL243C	AAD4	-3.13321	-2.57959	-1.09879	0.172297	-0.326065
YDL244W	THI13	-2.64644	-1.90786	-1.47075	0.126864	-0.185574
YDL245C	HXT15	-2.73883	-2.36562	-1.59157	0.307623	-0.238531
YDL246C	SOR2	-3.28594	-2.82883	-1.24832	0.194468	-0.398491
YDL247W	MPH2	-2.7053	-2.67972	-1.19093	0.00321157	-0.854205
YDL248W	COS7	-2.95491	-2.35857	-1.71052	0.298279	-0.522683
YDR001C	NTH1	-4.48762	-3.90782	-1.53285	0.0668507	-0.707675
YDR002W	YRB1	-5.60996	-4.24477	-1.87211	0.18936	-1.15371
YDR003W	RCR2	-4.12383	-3.67483	-1.82121	0.181297	-1.02489
YDR003W-A	YDR003W-A	-4.118	-3.79882	-1.7642	-0.0989434	-0.634228
YDR004W	RAD57	-4.14234	-3.36059	-1.95475	0.421015	-0.934399
YDR005C	MAF1	-4.11661	-3.25651	-2.14785	-0.0476492	-0.670577
YDR006C	SOK1	-5.18509	-4.72386	-1.91265	0.120773	-1.61264
YDR007W	TRP1	-1.38431	-1.5283	-0.997487	0.0953134	-0.601907
YDR009W	GAL3	-3.33297	-2.72625	-1.27901	0.361792	-0.335868
YDR011W	SNQ2	-4.59572	-3.95383	-0.805231	0.119965	-1.43786
YDR012W	RPL4B	-5.19804	-5.44819	-2.36248	0.167805	-1.54638
YDR013W	PSF1	-3.6034	-2.95133	-2.0174	0.350522	-0.812363
YDR014W	RAD61	-3.72815	-2.49399	-1.40447	0.0834661	-0.107134
YDR014W-A	HED1	-3.49974	-2.39387	-1.20678	0.341141	-0.17967
YDR016C	DAD1	-3.70224	-3.24164	-1.59498	0.163313	-0.713281
YDR017C	KCS1	-4.8408	-3.69595	-2.41884	-0.184145	-1.20637
YDR018C	YDR018C	-2.71419	-2.28248	-1.52209	0.38953	-0.880524
YDR019C	GCV1	-3.64025	-2.98625	-0.873091	0.531228	-0.960558
YDR020C	DAS2	-4.52483	-3.41377	-1.92761	0.313169	-1.09954
YDR021W	FAL1	-3.9916	-3.28726	-1.96164	0.358648	-0.835078
YDR022C	ATG31	-3.53271	-3.33336	-1.99963	-0.252951	-0.75188
YDR023W	SES1	-5.85509	-4.85474	-2.51137	0.0122653	-1.46762
YDR025W	RPS11A	-6.36977	-5.98194	-2.7948	0.27975	-2.00935
YDR026C	NSI1	-3.82814	-3.0727	-1.86173	0.107358	-0.671708
YDR027C	VPS54	-3.58063	-3.31842	-1.56785	0.0139743	-0.963183
YDR028C	REG1	-4.03319	-3.19923	-1.68895	0.0970097	-0.706005
YDR030C	RAD28	-3.58036	-2.8275	-1.57354	0.431954	-0.680474
YDR031W	MIX14	-3.14623	-2.8231	-1.42462	0.46547	-0.890195
YDR032C	PST2	-3.7088	-3.04434	-1.50442	0.131421	-0.915516
YDR033W	MRH1	-4.65276	-3.24803	-1.73213	0.22076	-1.34875
YDR034C	LYS14	-4.5406	-4.0227	-0.874159	-0.0423311	-0.793463
YDR034C-A	YDR034C-A	-3.29666	-2.5856	-1.29133	0.378089	-0.698284
YDR034C-C	YDR034C-C	-3.94166	-3.15842	-1.33637	0.228089	-0.579823
YDR034C-D	YDR034C-D	-3.94166	-3.15842	-1.33637	0.228089	-0.579823
YDR034W-B	YDR034W-B	-3.07231	-2.6854	-2.18543	0.136623	-0.757606
YDR035W	ARO3	-4.72246	-4.0493	-0.739655	-0.0549045	-1.02761
YDR036C	EHD3	-3.58918	-3.1663	-1.74421	0.370668	-0.51538
YDR037W	KRS1	-5.2792	-4.43103	-1.04996	0.0959337	-1.43672
YDR038C	ENA5	-3.59397	-2.75377	-1.59722	0.111384	-0.50755
YDR039C	ENA2	-3.70601	-2.8712	-1.5346	-0.0252668	-0.570307
YDR040C	ENA1	-3.00791	-3.4035	-1.10062	0.780382	-0.423214
YDR041W	RSM10	-3.8543	-3.47521	-0.715059	-0.150787	-0.879182
YDR042C	YDR042C	-3.56798	-2.60969	-1.86295	0.250549	-0.750483
YDR043C	NRG1	-4.10567	-3.99399	-1.28818	0.0172357	-0.990841
YDR044W	HEM13	-3.71817	-3.54372	-1.66785	0.0941416	-1.09536
YDR045C	RPC11	-4.79519	-3.98999	-1.81937	0.184836	-1.51943
YDR046C	BAP3	-4.93213	-4.2793	-0.933657	-0.00950715	-1.60673
YDR047W	HEM12	-5.17476	-5.00646	-2.21975	0.0245653	-1.56045
YDR049W	VMS1	-4.404	-3.29216	-1.69795	-0.0544272	-0.602116
YDR050C	TPI1	-3.84542	-3.19725	-0.481376	0.247434	-0.712951
YDR051C	DET1	-3.59253	-3.06348	-1.70504	0.463292	-0.68083
YDR052C	DBF4	-4.89974	-3.99736	-1.8522	0.182475	-1.38732
YDR054C	CDC34	-5.04347	-4.85739	-1.99234	0.271852	-1.3336
YDR055W	PST1	-3.85019	-3.53105	-1.5386	0.326961	-0.74681
YDR056C	YDR056C	-3.50168	-2.84747	-1.6719	0.441324	-0.630126
YDR057W	YOS9	-3.84071	-3.12748	-1.52455	0.0942653	-0.592413
YDR058C	TGL2	-3.95232	-2.5884	-1.57076	0.028527	-0.342859
YDR059C	UBC5	-3.84463	-3.16165	-1.3307	0.192971	-0.838476
YDR060W	MAK21	-4.79257	-4.48467	-2.17227	0.543512	-1.21796
YDR061W	YDR061W	-3.72976	-3.29941	-1.48434	0.29474	-0.51863
YDR062W	LCB2	-5.13288	-4.44731	-1.82074	0.0662612	-1.68814
YDR063W	AIM7	-4.64607	-3.84545	-1.8018	0.157767	-1.0929
YDR064W	RPS13	-5.79605	-5.8639	-2.7687	0.417158	-1.84329
YDR065W	RRG1	-3.60621	-2.89727	-2.08073	0.156864	-0.431827
YDR066C	RTR2	-3.48038	-2.51442	-1.69831	0.0991589	-0.315415
YDR067C	OCA6	-4.49963	-3.4556	-1.57543	0.12574	-0.716084
YDR068W	DOS2	-4.4116	-3.26435	-1.61171	-0.0717637	-0.630622
YDR069C	DOA4	-4.29817	-3.36333	-1.44031	0.10883	-0.92735
YDR070C	FMP16	-3.72103	-2.4672	-1.6265	0.364799	-0.426286
YDR071C	PAA1	-4.62993	-3.93332	-1.8096	0.249063	-1.11408
YDR072C	IPT1	-6.04485	-5.36877	-1.75801	0.0796017	-1.89343
YDR073W	SNF11	-5.27586	-4.74821	-2.34681	0.214006	-1.47236
YDR074W	TPS2	-3.81588	-3.28839	-1.56606	0.355504	-0.828469
YDR075W	PPH3	-4.55424	-3.529	-1.73957	0.234576	-0.838065
YDR076W	RAD55	-4.19453	-3.24463	-1.27176	-0.163845	-0.644145
YDR077W	SED1	-4.46395	-4.22085	-1.33146	0.272757	-0.977581
YDR078C	SHU2	-3.55691	-2.67631	-1.65727	0.192784	-0.501566
YDR079C-A	TFB5	-3.56207	-2.42609	-1.21984	0.120052	-0.305691
YDR079W	PET100	-3.99748	-3.00253	-1.64296	-0.0132201	-0.672041
YDR080W	VPS41	-3.40133	-2.60494	-1.23799	-0.00274585	-0.235941
YDR081C	PDC2	-3.57332	-3.10633	-1.59084	0.325668	-0.528708
YDR082W	STN1	-3.46114	-2.97863	-1.65848	0.2984	-0.565823
YDR083W	RRP8	-4.34448	-3.16648	-1.8206	-0.0934067	-0.447772
YDR084C	TVP23	-3.31575	-2.84514	-1.65216	0.238729	-0.293448
YDR085C	AFR1	-3.05569	-1.71835	-1.94282	0.4099	-0.548288
YDR086C	SSS1	-5.12517	-4.46478	-1.91508	0.246705	-1.31807
YDR087C	RRP1	-4.12948	-3.8518	-2.20292	0.23649	-0.474254
YDR088C	SLU7	-3.53039	-2.80157	-1.47816	-0.0596841	-0.409626
YDR089W	YDR089W	-4.58947	-3.57986	-1.63235	0.188204	-1.45102
YDR090C	YDR090C	-3.92739	-3.63719	-1.14381	0.371349	-0.733307
YDR091C	RLI1	-5.22979	-4.94325	-2.08559	0.395194	-1.75216
YDR092W	UBC13	-4.2135	-3.56892	-1.36236	0.0684332	-1.19476
YDR093W	DNF2	-4.66115	-3.99437	-1.8076	0.0530439	-1.16156
YDR096W	GIS1	-4.32233	-3.07912	-1.64704	0.284354	-1.00427
YDR097C	MSH6	-4.138	-3.25536	-1.72078	0.327841	-0.782931
YDR098C	GRX3	-4.71277	-4.15308	-1.49855	0.165744	-1.09044
YDR098C-A	YDR098C-A	-4.2225	-3.20856	-1.71896	0.238589	-0.531649
YDR098C-B	YDR098C-B	-4.2225	-3.20856	-1.71896	0.238589	-0.531649
YDR099W	BMH2	-5.03266	-4.53139	-1.80645	0.0034402	-1.85414
YDR100W	TVP15	-3.98458	-3.52103	-0.675762	0.0790061	-1.00465
YDR101C	ARX1	-5.1097	-4.40607	-2.16872	0.579421	-1.44667
YDR103W	STE5	-4.36134	-3.37586	-2.17126	0.15713	-0.876293
YDR104C	SPO71	-3.03965	-2.7264	-1.16361	0.2916	-0.790502
YDR105C	TMS1	-3.58014	-2.81599	-1.52045	0.201859	-0.633535
YDR106W	ARP10	-3.95046	-2.95915	-1.61952	0.316338	-0.729949
YDR107C	TMN2	-3.56291	-3.02155	-1.48198	-0.0448921	-0.669161
YDR108W	TRS85	-3.74614	-2.78598	-1.49965	0.0439091	-0.467763
YDR109C	YDR109C	-3.66872	-2.76356	-1.70626	0.181737	-0.474293
YDR110W	FOB1	-3.96387	-3.231	-1.8336	0.338667	-0.645298
YDR111C	ALT2	-4.18966	-3.54344	-1.32944	0.149613	-1.08767
YDR113C	PDS1	-4.34163	-3.99195	-2.15483	0.333312	-1.22742
YDR114C	YDR114C	-3.21008	-2.70039	-1.36382	0.0196473	-0.413096
YDR115W	YDR115W	-3.25082	-2.76768	-1.40534	0.0326896	-0.454329
YDR116C	MRPL1	-3.88857	-3.02884	-1.58506	0.223065	-0.650256
YDR117C	TMA64	-3.88397	-2.86177	-1.57979	-0.158013	-0.371899
YDR118W	APC4	-3.62928	-2.87892	-1.65666	-0.0686546	-0.519669
YDR119W	VBA4	-4.61552	-4.2044	-1.9856	0.0926699	-1.17268
YDR119W-A	COX26	-3.39642	-2.66336	-1.33946	0.167749	-0.806646
YDR120C	TRM1	-4.37066	-3.61556	-1.603	0.088654	-1.07524
YDR121W	DPB4	-3.79755	-2.79427	-1.57552	0.0188858	-0.780271
YDR122W	KIN1	-3.66282	-2.98223	-1.41124	0.280246	-1.08416
YDR123C	INO2	-4.96634	-4.92691	-2.05409	0.31471	-1.37258
YDR124W	YDR124W	-4.92528	-4.78171	-1.6422	0.447252	-1.42825
YDR125C	ECM18	-3.80044	-2.91706	-1.21537	-0.0374978	-0.155886
YDR126W	SWF1	-4.01874	-3.18964	-0.905349	0.0416444	-0.554337
YDR127W	ARO1	-4.68111	-4.49925	-1.14058	0.21242	-1.13756
YDR128W	MTC5	-3.2587	-2.95742	-1.59633	0.290092	-0.503197
YDR129C	SAC6	-4.42888	-3.99128	-2.34919	0.185263	-1.33077
YDR130C	FIN1	-3.63723	-3.28671	-1.90383	0.273084	-0.59474
YDR131C	YDR131C	-3.72461	-2.52847	-1.74853	0.155968	-0.51834
YDR132C	YDR132C	-3.8661	-3.24743	-1.51091	0.00803188	-0.702709
YDR134C	YDR134C	-4.64756	-4.48824	-0.976532	-0.020459	-1.20652
YDR135C	YCF1	-3.98484	-3.33148	-1.4852	-0.174674	-0.665066
YDR137W	RGP1	-3.74825	-2.79714	-1.4261	-0.060482	-0.426043
YDR138W	HPR1	-3.99442	-3.23748	-0.894455	0.160313	-0.768141
YDR139C	RUB1	-3.98677	-3.09115	-1.7183	0.133391	-0.763284
YDR140W	MTQ2	-4.07798	-3.39796	-1.80691	0.207412	-0.513959
YDR141C	DOP1	-3.41676	-2.38245	-1.67223	0.148426	-0.483998
YDR142C	PEX7	-3.5137	-2.9505	-1.31729	0.0445825	-0.335927
YDR143C	SAN1	-3.82751	-2.53913	-1.72459	-0.0773908	-0.689683
YDR144C	MKC7	-4.61383	-3.66774	-1.80594	0.365443	-1.16256
YDR145W	TAF12	-3.4489	-2.75545	-1.41192	0.372058	-0.554377
YDR146C	SWI5	-5.00353	-4.67963	-2.58074	0.28764	-1.20786
YDR147W	EKI1	-4.75508	-4.28745	-2.16494	0.296205	-1.11534
YDR148C	KGD2	-4.13716	-3.58806	-1.74408	0.144938	-1.14067
YDR150W	NUM1	-4.15948	-3.66388	-1.5684	0.198427	-1.26201
YDR151C	CTH1	-4.82065	-4.42097	-1.40951	0.147414	-1.1927
YDR152W	GIR2	-4.63469	-3.937	-1.83034	0.307795	-0.945921
YDR153C	ENT5	-5.26309	-4.68483	-2.0315	0.0739629	-1.48392
YDR155C	CPR1	-4.89261	-4.59197	-1.67014	0.283266	-1.27125
YDR156W	RPA14	-5.89788	-5.29656	-1.3265	0.175473	-1.20575
YDR158W	HOM2	-4.82766	-4.40951	-0.967699	0.0861392	-1.02128
YDR159W	SAC3	-3.4303	-3.12039	-1.54722	0.136213	-0.5849
YDR160W	SSY1	-3.66586	-3.16911	-1.79964	0.101664	-0.439335
YDR161W	YDR161W	-4.07419	-3.22682	-1.48895	0.290169	-0.597181
YDR162C	NBP2	-3.50543	-2.58658	-1.33724	0.0670488	-0.278912
YDR163W	CWC15	-3.73556	-2.67533	-1.39844	0.0479144	-0.296547
YDR164C	SEC1	-3.85824	-2.89247	-1.51952	0.208448	-0.467885
YDR165W	TRM82	-4.83592	-3.95005	-1.95649	0.332714	-1.00081
YDR166C	SEC5	-3.81837	-2.51654	-1.65927	-0.00204552	-0.550129
YDR167W	TAF10	-3.89325	-2.61555	-1.58396	-0.0460834	-0.419253
YDR168W	CDC37	-3.67512	-3.08375	-1.63655	0.186127	-0.777734
YDR169C	STB3	-4.28207	-3.76217	-2.42503	0.057839	-0.817219
YDR169C-A	YDR169C-A	-3.8188	-3.39404	-1.92179	0.174633	-0.658289
YDR170C	SEC7	-4.60585	-3.55567	-1.38191	-0.00968744	-0.931036
YDR170W-A	YDR170W-A	-3.96926	-3.56117	-0.64953	0.24789	-0.628858
YDR171W	HSP42	-3.44066	-3.56107	-1.41464	0.256099	-0.562305
YDR172W	SUP35	-4.96945	-4.7698	-1.9258	0.316104	-1.32671
YDR173C	ARG82	-4.40124	-3.45493	-2.1348	0.231797	-0.379148
YDR174W	HMO1	-4.80188	-4.44718	-1.98142	0.27286	-1.21384
YDR175C	RSM24	-4.21969	-3.30237	-1.33939	0.303677	-0.86384
YDR176W	NGG1	-4.31051	-3.14074	-1.84322	0.242665	-0.93738
YDR177W	UBC1	-4.04684	-3.72032	-2.05347	0.301143	-1.56268
YDR178W	SDH4	-3.27817	-2.41179	-1.48472	0.122031	-0.482886
YDR179C	CSN9	-3.95958	-2.79874	-1.70981	0.112306	-0.49408
YDR179W-A	YDR179W-A	-3.82825	-2.63057	-1.38451	0.125579	-0.397313
YDR180W	SCC2	-3.89064	-3.17333	-1.81802	0.129773	-0.927133
YDR181C	SAS4	-4.23312	-2.88959	-1.45609	0.185448	-0.561396
YDR182W	CDC1	-4.27344	-2.96556	-1.4483	0.179544	-0.566438
YDR182W-A	YDR182W-A	-2.68738	-2.068	-1.6765	0.299322	-0.273159
YDR183W	PLP1	-3.30743	-2.38258	-1.59962	0.329977	-0.220671
YDR184C	ATC1	-4.62651	-4.40653	-1.91111	0.402713	-0.969971
YDR185C	UPS3	-3.86854	-3.20371	-1.64986	0.259938	-0.684141
YDR186C	YDR186C	-4.61142	-4.34159	-1.0543	0.181734	-1.07516
YDR188W	CCT6	-5.26544	-5.21774	-2.05625	0.394144	-1.50997
YDR189W	SLY1	-3.83454	-3.57247	-1.69424	0.148868	-0.861493
YDR190C	RVB1	-4.43764	-3.95162	-2.02241	0.5199	-1.04831
YDR191W	HST4	-4.07015	-3.17061	-1.80393	0.0981315	-0.678913
YDR192C	NUP42	-3.25499	-2.83169	-1.60192	0.375498	-0.458516
YDR194C	MSS116	-4.17249	-3.64067	-1.70226	0.376589	-0.899665
YDR194W-A	YDR194W-A	-4.10688	-3.69014	-1.69462	0.291171	-0.805549
YDR195W	REF2	-4.24243	-3.12464	-1.87516	0.212797	-0.682765
YDR196C	CAB5	-3.74253	-3.02349	-1.56406	0.0809282	-0.490679
YDR197W	CBS2	-3.91862	-3.05343	-1.85046	0.132124	-0.58143
YDR198C	RKM2	-3.81028	-2.9068	-1.81542	0.081209	-0.62136
YDR200C	VPS64	-3.01463	-2.35105	-1.37831	0.195651	-0.166683
YDR201W	SPC19	-3.2236	-2.42384	-1.51436	0.0124467	-0.226545
YDR202C	RAV2	-3.01797	-2.18453	-1.59883	0.325214	-0.118925
YDR204W	COQ4	-2.98733	-2.31992	-1.49647	0.224355	-0.118501
YDR205W	MSC2	-2.86118	-2.49689	-1.43813	0.126616	-0.235645
YDR206W	EBS1	-4.20013	-3.06685	-1.92777	0.0437696	-0.99945
YDR207C	UME6	-4.24968	-4.35907	-1.31996	0.0937776	-1.28346
YDR208W	MSS4	-4.84812	-4.36197	-1.5155	0.0583998	-1.51287
YDR210C-C	YDR210C-C	-4.22987	-3.58702	-1.59553	0.130899	-0.479056
YDR210C-D	YDR210C-D	-4.22987	-3.58702	-1.59553	0.130899	-0.479056
YDR210W	YDR210W	-4.17106	-3.48545	-1.85783	0.377472	-0.694047
YDR210W-A	YDR210W-A	-3.97569	-3.52195	-1.73618	0.19257	-0.370294
YDR210W-B	YDR210W-B	-3.97569	-3.52195	-1.73618	0.19257	-0.370294
YDR211W	GCD6	-4.87663	-4.08289	-1.90037	0.295841	-1.0517
YDR212W	TCP1	-3.91659	-3.28983	-1.75326	0.313124	-0.952159
YDR213W	UPC2	-4.29906	-3.72717	-1.47123	0.122585	-1.48491
YDR214W	AHA1	-4.0636	-4.08001	-1.26636	0.0390819	-1.20603
YDR216W	ADR1	-3.63509	-3.89599	-0.952476	0.741586	-0.919398
YDR217C	RAD9	-3.20326	-2.8903	-1.13549	0.0418365	-0.504192
YDR218C	SPR28	-2.94103	-2.23692	-1.87378	0.637483	-0.221848
YDR219C	MFB1	-3.51507	-2.87365	-1.59404	0.403466	-0.599783
YDR221W	GTB1	-3.1265	-2.65974	-1.39743	0.227991	-0.587802
YDR222W	YDR222W	-4.39008	-4.63527	-2.60848	0.870961	-1.20811
YDR223W	CRF1	-4.40403	-3.61917	-1.64377	0.402718	-1.23523
YDR224C	HTB1	-4.83397	-3.82709	-1.70845	0.344603	-1.09368
YDR225W	HTA1	-3.99077	-3.53602	-1.62013	0.274755	-0.681184
YDR226W	ADK1	-3.87722	-3.43507	-1.55385	0.209554	-0.712766
YDR227W	SIR4	-3.74566	-2.52785	-1.3897	-0.103136	-0.289008
YDR228C	PCF11	-4.09441	-3.3322	-1.96141	0.148513	-1.00611
YDR229W	IVY1	-4.13466	-3.46422	-1.60768	0.0536974	-0.939264
YDR231C	COX20	-3.99118	-4.05114	-1.17579	-0.000966775	-1.34442
YDR232W	HEM1	-5.17605	-4.61788	-1.51078	0.159427	-1.63629
YDR233C	RTN1	-4.91726	-3.9409	-1.56969	0.242563	-1.15562
YDR234W	LYS4	-4.48851	-4.14063	-1.25382	0.118183	-1.08761
YDR235W	PRP42	-4.15791	-3.22607	-1.8203	0.0713787	-0.679864
YDR236C	FMN1	-2.94006	-2.71117	-1.5133	0.148661	-0.478472
YDR237W	MRPL7	-3.60536	-2.67887	-1.52857	0.0151486	-0.545839
YDR238C	SEC26	-3.78936	-3.83883	-2.18148	0.385	-0.858061
YDR239C	YDR239C	-3.86879	-2.93633	-1.6449	0.19739	-0.284764
YDR240C	SNU56	-3.43248	-2.83242	-1.62771	0.154782	-0.485042
YDR242W	AMD2	-3.66284	-2.74982	-1.35172	-0.00366549	-0.679845
YDR243C	PRP28	-4.2494	-2.92365	-1.74843	0.345504	-0.414238
YDR244W	PEX5	-4.03635	-3.39133	-1.14406	0.269158	-0.624311
YDR245W	MNN10	-4.77867	-3.92597	-2.06189	0.165929	-1.06966
YDR246W	TRS23	-3.69175	-3.69152	-1.85307	0.229147	-0.876924
YDR246W-A	YDR246W-A	-3.95692	-3.70814	-1.88452	0.248336	-0.951115
YDR247W	VHS1	-3.75775	-3.72174	-2.31189	0.346801	-1.20459
YDR248C	YDR248C	-3.08059	-2.60387	-1.83264	0.209645	-0.256942
YDR249C	YDR249C	-4.12886	-3.83915	-1.60101	0.286456	-1.24822
YDR251W	PAM1	-4.41796	-3.51433	-1.5224	0.174657	-1.12198
YDR252W	BTT1	-3.40207	-2.83821	-1.54956	0.341281	-0.598245
YDR253C	MET32	-3.22275	-2.29246	-0.931035	-0.0398952	-0.480541
YDR254W	CHL4	-2.97873	-2.59432	-1.37672	0.446543	-0.70895
YDR255C	RMD5	-3.72389	-2.8274	-1.65072	0.178844	-0.576227
YDR256C	CTA1	-2.38731	-2.73406	-1.13203	0.613367	-0.260951
YDR257C	RKM4	-4.20894	-3.31289	-1.36163	0.177584	-0.851641
YDR258C	HSP78	-4.29541	-3.34128	-0.521185	-0.0679076	-1.0063
YDR259C	YAP6	-3.57299	-3.81088	-1.15751	0.131439	-1.06454
YDR260C	SWM1	-4.6966	-4.20475	-0.905804	0.130916	-1.56186
YDR261C	EXG2	-4.80881	-4.15181	-1.99055	0.125998	-1.25736
YDR261C-C	YDR261C-C	-4.19532	-3.67959	-1.71134	0.256752	-0.48916
YDR261C-D	YDR261C-D	-4.19532	-3.67959	-1.71134	0.256752	-0.48916
YDR261W-A	YDR261W-A	-3.73218	-3.10747	-1.44177	0.338075	-0.478711
YDR261W-B	YDR261W-B	-3.73218	-3.10747	-1.44177	0.338075	-0.478711
YDR262W	YDR262W	-4.7093	-3.961	-1.27651	0.227432	-1.13982
YDR263C	DIN7	-2.88247	-2.31114	-1.81242	0.273756	-0.436594
YDR264C	AKR1	-4.71662	-4.57604	-1.2898	0.14497	-1.51098
YDR265W	PEX10	-4.57839	-4.11306	-1.33492	0.0138813	-1.33793
YDR266C	HEL2	-4.34237	-3.68381	-1.93205	-0.0555077	-0.985632
YDR267C	CIA1	-4.41598	-3.7188	-1.6288	0.0750248	-0.92652
YDR268W	MSW1	-4.18259	-3.50524	-1.40176	0.0438626	-0.675914
YDR270W	CCC2	-4.22095	-4.35182	-1.20143	0.113265	-1.49756
YDR272W	GLO2	-3.919	-3.21987	-1.77426	-0.0472873	-0.504283
YDR273W	DON1	-3.53428	-3.81464	-1.91915	0.627698	-0.483076
YDR275W	BSC2	-4.73039	-4.35233	-1.58331	0.0541513	-1.42089
YDR276C	PMP3	-5.56313	-5.58939	-1.81193	0.0127852	-1.7092
YDR277C	MTH1	-3.30391	-3.14429	-0.845734	0.0742565	-0.813883
YDR279W	RNH202	-4.02775	-3.40213	-1.82946	0.142406	-0.678093
YDR280W	RRP45	-4.10226	-3.8179	-2.17849	0.202244	-0.922662
YDR281C	PHM6	-5.41832	-4.97947	-4.03385	0.149472	-0.810644
YDR282C	YDR282C	-3.36681	-2.44101	-1.37232	0.181957	-0.34773
YDR283C	GCN2	-3.73407	-2.44683	-1.58116	0.0683864	-0.69741
YDR284C	DPP1	-3.72231	-3.34983	-1.68175	0.072701	-0.667571
YDR285W	ZIP1	-4.0866	-3.65855	-2.36516	-0.0995428	-1.09401
YDR286C	YDR286C	-3.54884	-2.61573	-1.82693	0.218629	-0.346715
YDR287W	INM2	-3.76151	-2.7974	-1.8728	0.238394	-0.53616
YDR288W	NSE3	-3.44927	-2.85094	-1.65401	0.0805233	-0.382543
YDR289C	RTT103	-3.71316	-2.63695	-1.62591	0.00127837	-0.430645
YDR291W	HRQ1	-3.96734	-2.71615	-1.60102	-0.158953	-0.408626
YDR292C	SRP101	-4.11106	-3.53549	-1.68655	0.402039	-0.667281
YDR293C	SSD1	-3.99612	-4.01493	-2.34815	0.263275	-0.690035
YDR294C	DPL1	-3.90294	-3.35099	-1.82404	0.183714	-0.826725
YDR295C	HDA2	-4.31351	-3.15013	-1.44458	-0.0196101	-0.795546
YDR296W	MHR1	-4.06412	-3.42928	-1.60914	-0.108968	-0.821044
YDR297W	SUR2	-4.28623	-4.23563	-1.72536	0.154984	-1.0206
YDR298C	ATP5	-3.59337	-3.20215	-1.53315	0.286226	-0.907914
YDR299W	BFR2	-4.58596	-3.20987	-1.82273	0.516145	-0.812492
YDR300C	PRO1	-4.05471	-3.45424	-1.70136	0.467489	-0.696204
YDR301W	CFT1	-3.13712	-2.99453	-1.39508	0.254685	-0.392399
YDR302W	GPI11	-3.94972	-2.86321	-1.80599	0.138515	-0.741542
YDR303C	RSC3	-3.50393	-3.29666	-1.84628	0.181564	-0.482842
YDR304C	CPR5	-4.27536	-3.33918	-1.73668	-0.0231418	-0.584932
YDR305C	HNT2	-3.48558	-2.73545	-1.61437	0.283563	-0.605541
YDR306C	YDR306C	-3.54355	-2.7663	-1.40661	-0.0898669	-0.428061
YDR307W	PMT7	-3.67234	-2.69837	-1.69446	0.140554	-0.359644
YDR308C	SRB7	-3.44847	-2.68403	-1.48133	0.10509	-0.229642
YDR309C	GIC2	-5.69194	-5.11446	-1.44361	0.104323	-1.31937
YDR310C	SUM1	-4.95935	-4.33163	-2.24071	0.314968	-1.70493
YDR311W	TFB1	-3.47929	-3.06056	-1.42388	0.0595472	-0.839919
YDR312W	SSF2	-3.35536	-2.94627	-1.06858	0.265271	-0.61703
YDR313C	PIB1	-4.18379	-3.46772	-1.46353	0.0636214	-1.18295
YDR314C	RAD34	-3.78027	-2.57774	-1.49819	0.129263	-0.621168
YDR315C	IPK1	-3.39256	-2.54723	-1.6655	0.145529	-0.649978
YDR316W	OMS1	-3.64127	-2.87863	-1.69672	0.117627	-0.771303
YDR316W-A	YDR316W-A	-3.89724	-3.41059	-1.29867	0.263366	-0.455631
YDR316W-B	YDR316W-B	-3.89724	-3.41059	-1.29867	0.263366	-0.455631
YDR317W	HIM1	-3.11988	-2.4297	-1.87394	0.456088	-0.30657
YDR318W	MCM21	-3.9853	-2.81759	-1.7495	0.0258953	-0.62274
YDR319C	YFT2	-4.44693	-3.60467	-1.74326	-0.0115713	-0.905488
YDR320C	SWA2	-3.93855	-3.32973	-1.64404	0.0623618	-0.573379
YDR320C-A	DAD4	-5.09231	-3.88334	-1.76941	0.0904043	-1.23673
YDR321W	ASP1	-4.69651	-3.95591	-1.77026	0.0852022	-1.04774
YDR322C-A	TIM11	-3.89243	-3.25656	-1.62666	0.060221	-0.694924
YDR322W	MRPL35	-3.63	-3.00097	-1.79585	0.138142	-0.463493
YDR323C	PEP7	-2.99804	-2.36655	-1.29539	0.0849646	-0.519051
YDR324C	UTP4	-4.875	-4.25863	-2.33374	0.164216	-0.912856
YDR325W	YCG1	-4.13401	-3.21581	-2.02552	0.362297	-0.825588
YDR326C	YSP2	-4.25557	-3.41501	-1.48026	0.0601722	-1.01659
YDR328C	SKP1	-3.56344	-2.76866	-1.51444	0.187676	-0.597136
YDR329C	PEX3	-2.80226	-2.51062	-1.73246	0.187227	-0.341664
YDR330W	UBX5	-3.28454	-2.98443	-1.82334	0.154557	-0.445149
YDR331W	GPI8	-4.15063	-3.48873	-1.81081	0.380068	-0.733999
YDR332W	IRC3	-3.24685	-2.41837	-1.40651	0.026056	-0.332109
YDR333C	RQC1	-3.95506	-3.50637	-1.66559	0.234282	-0.590978
YDR334W	SWR1	-5.11075	-4.30784	-2.07651	0.278741	-1.62669
YDR335W	MSN5	-3.96278	-3.75487	-1.32854	0.292967	-1.09157
YDR336W	YDR336W	-4.0907	-2.92211	-1.79012	-0.000442639	-0.599699
YDR337W	MRPS28	-4.02011	-3.4619	-1.64622	0.0794203	-0.768929
YDR338C	YDR338C	-3.4098	-2.68518	-1.57417	0.111141	-0.347308
YDR339C	FCF1	-4.65401	-3.7309	-1.68165	0.182325	-0.798245
YDR341C	YDR341C	-5.17327	-4.31953	-1.16264	0.0775055	-1.29935
YDR342C	HXT7	-3.01671	-3.0532	-1.58095	-0.0858183	-0.767034
YDR343C	HXT6	-2.47452	-2.46634	-2.33423	0.154727	-0.633719
YDR345C	HXT3	-3.79458	-4.15281	-0.995813	0.276852	-1.12455
YDR346C	SVF1	-4.84595	-4.51856	-1.8163	0.284762	-1.34216
YDR347W	MRP1	-3.64232	-3.42777	-1.47156	0.183566	-0.776368
YDR348C	PAL1	-4.34604	-3.57444	-1.84956	0.0566198	-0.871968
YDR349C	YPS7	-3.67884	-3.31226	-1.40724	0.25129	-0.619549
YDR350C	ATP22	-3.51799	-3.06298	-1.34755	0.183962	-0.940881
YDR351W	SBE2	-4.20574	-3.42712	-1.53064	0.142352	-1.15084
YDR352W	YPQ2	-4.19815	-3.87326	-2.18838	0.0883455	-1.01043
YDR353W	TRR1	-4.95435	-4.81517	-1.30347	-0.0189315	-1.28332
YDR354W	TRP4	-4.4097	-3.93523	-0.739516	0.166426	-1.40621
YDR356W	SPC110	-3.26993	-2.88968	-1.4477	-0.163266	-0.765911
YDR357C	CNL1	-4.02034	-3.34466	-1.56491	0.355582	-1.05931
YDR358W	GGA1	-3.89836	-3.19082	-1.39605	-0.0203949	-0.580108
YDR359C	EAF1	-4.21461	-4.60711	-1.80465	0.414095	-1.52088
YDR361C	BCP1	-4.07124	-3.68491	-2.04119	0.133152	-0.929326
YDR362C	TFC6	-3.90648	-2.99567	-1.5893	0.202929	-0.515086
YDR363W	ESC2	-3.42367	-2.63853	-1.3067	0.408852	-0.640905
YDR363W-A	SEM1	-4.66272	-3.77389	-1.76896	0.442467	-1.20029
YDR364C	CDC40	-3.93795	-3.55579	-1.70643	0.284631	-0.691045
YDR365C	ESF1	-4.41629	-3.93466	-0.189245	0.159645	-1.08771
YDR365W-A	YDR365W-A	-4.43659	-3.84624	-1.77798	0.240767	-0.513446
YDR365W-B	YDR365W-B	-4.43659	-3.84624	-1.77798	0.240767	-0.513446
YDR366C	YDR366C	-3.81807	-3.11561	-2.21699	0.27122	-0.604654
YDR367W	KEI1	-3.80533	-3.11846	-2.2277	0.316833	-0.616824
YDR368W	YPR1	-4.19798	-3.37216	-2.02421	0.343845	-0.491874
YDR369C	XRS2	-2.85791	-2.0691	-1.26769	0.251905	-0.206379
YDR370C	DXO1	-3.77872	-3.1181	-1.77478	0.197963	-0.398448
YDR371W	CTS2	-3.63278	-2.90669	-1.45861	0.296843	-0.522286
YDR372C	VPS74	-4.21288	-3.36248	-1.77085	-0.0821662	-0.878197
YDR373W	FRQ1	-4.02575	-3.03252	-1.83291	-0.0723336	-0.829363
YDR374C	PHO92	-2.88835	-2.57668	-1.70499	0.168228	-0.0175762
YDR374W-A	WIP1	-3.2019	-3.35715	-1.94451	0.00980272	-0.592978
YDR375C	BCS1	-3.82728	-3.24938	-1.71332	0.19939	-0.43184
YDR376W	ARH1	-3.83216	-2.80744	-1.28356	0.154701	-0.46734
YDR377W	ATP17	-4.01952	-3.4045	-1.50364	0.213317	-0.851737
YDR378C	LSM6	-3.48379	-3.25264	-1.72403	0.380218	-0.635213
YDR379C-A	SDH6	-3.7118	-3.01122	-1.06491	0.144639	-0.660002
YDR379W	RGA2	-3.44168	-3.02691	-1.15714	0.140565	-0.626676
YDR380W	ARO10	-3.32436	-2.71386	-1.83846	0.267949	-0.0167658
YDR381C-A	YDR381C-A	-3.33115	-2.93229	-1.65308	0.232144	-0.575876
YDR381W	YRA1	-3.01754	-2.5276	-0.175416	0.127327	-0.206176
YDR382W	RPP2B	-5.57029	-5.46898	-2.65299	0.259456	-1.59319
YDR383C	NKP1	-4.31316	-3.5668	-1.72502	0.271614	-0.840728
YDR384C	ATO3	-5.44975	-4.78359	-1.24354	0.112196	-1.77779
YDR385W	EFT2	-5.2119	-5.11349	-1.88662	0.204795	-1.47799
YDR386W	MUS81	-4.0025	-2.64584	-1.85671	-0.0563587	-0.474291
YDR387C	YDR387C	-3.82981	-3.13341	-1.49877	0.103921	-0.588405
YDR388W	RVS167	-3.78256	-3.07956	-1.4908	0.163346	-0.778322
YDR389W	SAC7	-4.697	-4.2822	-1.70476	0.201849	-1.2848
YDR390C	UBA2	-3.73445	-3.24564	-1.52376	0.213375	-0.715363
YDR391C	YDR391C	-3.82342	-3.11212	-1.80396	0.227397	-0.504237
YDR392W	SPT3	-3.58347	-2.98101	-3.09196	0.192219	-0.674221
YDR393W	SHE9	-3.8702	-3.06802	-1.65111	0.0274067	-1.05914
YDR394W	RPT3	-4.76677	-4.21832	-2.31453	0.413399	-1.57604
YDR395W	SXM1	-4.8143	-4.22402	-2.1857	0.312675	-1.09938
YDR397C	NCB2	-4.46037	-3.69039	-1.4143	0.209041	-1.19198
YDR398W	UTP5	-5.08012	-5.03105	-2.1022	0.283696	-1.52062
YDR399W	HPT1	-4.98232	-4.47941	-2.06329	0.3003	-1.33319
YDR400W	URH1	-3.33509	-2.86908	-1.75352	0.144014	-0.369893
YDR402C	DIT2	-3.09897	-2.52512	-1.71567	0.0698106	-0.241546
YDR403W	DIT1	-2.41585	-2.28705	-1.97031	0.268664	-0.0672186
YDR404C	RPB7	-3.93111	-3.47537	-1.88878	0.170785	-0.886947
YDR405W	MRP20	-3.89661	-3.6927	-1.93916	0.26905	-1.03523
YDR406W	PDR15	-2.94735	-3.68091	-2.16253	0.510302	-1.13691
YDR407C	TRS120	-3.11464	-2.63392	-1.7508	0.472685	-0.824403
YDR408C	ADE8	-3.97223	-3.77767	-1.33321	0.265607	-0.849432
YDR409W	SIZ1	-3.97208	-3.064	-1.57007	0.295853	-0.602895
YDR410C	STE14	-4.20398	-3.50085	-1.80044	0.129733	-0.696383
YDR411C	DFM1	-3.76988	-3.18658	-1.94442	0.259764	-1.03108
YDR412W	RRP17	-4.03899	-3.23069	-1.91473	0.24892	-0.6803
YDR414C	ERD1	-4.11683	-3.84842	-2.18587	0.0185715	-0.919522
YDR415C	YDR415C	-4.06632	-2.84214	-1.82735	0.130472	-0.403119
YDR416W	SYF1	-4.14669	-3.01063	-1.9534	0.0610915	-0.434251
YDR418W	RPL12B	-6.30843	-5.74493	-2.97741	0.294865	-1.86427
YDR419W	RAD30	-3.51391	-2.97325	-1.83131	0.227568	-0.447623
YDR420W	HKR1	-4.80979	-4.09885	-2.038	0.188382	-1.23833
YDR421W	ARO80	-3.26653	-2.34114	-1.68994	0.204374	-0.408943
YDR422C	SIP1	-3.57896	-3.00172	-1.64678	0.08496	-0.741517
YDR423C	CAD1	-4.3843	-3.58858	-1.62369	0.149374	-1.05813
YDR424C	DYN2	-4.52976	-3.19696	-1.80253	-0.0435552	-0.960986
YDR425W	SNX41	-3.73269	-3.04466	-1.56417	0.0979865	-0.354987
YDR427W	RPN9	-4.64784	-3.87467	-2.1597	0.431114	-1.40123
YDR428C	BNA7	-3.43981	-2.47599	-1.80138	0.241076	-0.422149
YDR429C	TIF35	-5.12613	-4.0979	-2.0454	0.334393	-1.08128
YDR430C	CYM1	-4.05724	-3.80329	-1.72769	0.23271	-0.887593
YDR432W	NPL3	-5.17587	-5.09353	-2.14457	0.380802	-1.79186
YDR434W	GPI17	-3.36246	-2.92155	-1.48033	0.50819	-0.407328
YDR435C	PPM1	-2.91704	-2.65022	-1.20552	0.31956	-0.330793
YDR436W	PPZ2	-2.84883	-2.35251	-1.40976	0.282048	-0.23498
YDR437W	GPI19	-3.60263	-3.12636	-1.64796	0.148281	-0.422553
YDR438W	THI74	-3.51513	-2.55908	-1.78537	0.0923762	-0.101465
YDR439W	LRS4	-3.63495	-2.45502	-1.52852	0.000204346	-0.302411
YDR440W	DOT1	-3.94294	-3.24551	-1.90693	0.183454	-0.624399
YDR441C	APT2	-5.05555	-4.80223	-2.39336	0.48127	-1.69775
YDR443C	SSN2	-3.88101	-3.06212	-1.67537	-0.051844	-0.610665
YDR444W	YDR444W	-3.8972	-3.56411	-2.19923	0.142279	-0.812058
YDR446W	ECM11	-3.65023	-3.08256	-1.65053	0.190709	-0.634992
YDR447C	RPS17B	-6.30395	-5.61982	-2.92741	0.217813	-2.08205
YDR448W	ADA2	-4.11989	-3.77472	-2.07494	0.106491	-1.21689
YDR449C	UTP6	-4.98035	-4.47754	-2.36218	0.520757	-1.21472
YDR450W	RPS18A	-6.25849	-5.99309	-2.77644	0.232445	-2.20266
YDR451C	YHP1	-4.27831	-3.78388	-1.58588	0.46908	-1.34251
YDR452W	PPN1	-3.5991	-3.69908	-1.89128	0.111592	-0.983517
YDR453C	TSA2	-3.69256	-2.9157	-1.7796	0.433425	-0.598866
YDR454C	GUK1	-4.61305	-4.21407	-2.1243	0.200348	-0.93341
YDR456W	NHX1	-3.49714	-3.35075	-1.43293	0.183475	-0.795063
YDR457W	TOM1	-3.7581	-2.90123	-1.61322	0.24214	-0.779471
YDR458C	HEH2	-3.62466	-2.53203	-1.45167	0.121134	-0.301996
YDR459C	PFA5	-3.43845	-2.9483	-1.63623	0.279314	-0.53766
YDR460W	TFB3	-3.5649	-2.88361	-1.57496	0.175952	-0.501587
YDR461C-A	YDR461C-A	-3.29133	-2.87968	-1.81598	0.091101	-0.808696
YDR461W	MFA1	-2.88608	-1.91693	-1.09222	0.297629	-0.495795
YDR462W	MRPL28	-3.80466	-3.39752	-1.63458	-0.0860547	-0.699922
YDR463W	STP1	-3.82431	-3.76503	-1.67393	0.111244	-0.828671
YDR464W	SPP41	-3.59945	-3.02656	-1.69054	0.500222	-0.563828
YDR465C	RMT2	-4.02499	-3.51132	-1.80562	0.188336	-0.67636
YDR466W	PKH3	-4.13826	-3.68159	-1.79054	0.0790535	-0.638686
YDR468C	TLG1	-3.91738	-3.09784	-2.05631	0.291945	-0.776658
YDR469W	SDC1	-4.357	-3.45215	-1.8206	0.198762	-0.777589
YDR470C	UGO1	-3.38223	-3.12214	-1.87035	0.251174	-1.05455
YDR471W	RPL27B	-6.51004	-5.91072	-2.99808	0.292198	-2.15933
YDR472W	TRS31	-4.02415	-3.25512	-1.95751	0.412206	-0.635524
YDR473C	PRP3	-3.75848	-2.9139	-1.60934	0.0323464	-0.456646
YDR475C	JIP4	-3.61632	-3.02935	-1.36987	0.0208006	-0.417325
YDR476C	YDR476C	-3.82989	-3.4196	-1.34617	0.225497	-0.896442
YDR477W	SNF1	-3.70899	-3.01026	-1.42303	0.234863	-0.915998
YDR478W	SNM1	-3.78797	-2.75105	-1.90884	0.134577	-0.520554
YDR479C	PEX29	-3.31721	-2.86087	-1.47091	0.249026	-0.31582
YDR480W	DIG2	-3.55788	-3.08186	-1.68411	-0.0345502	-0.378542
YDR481C	PHO8	-4.08977	-3.63176	-1.39013	0.0468374	-0.576306
YDR482C	CWC21	-3.50686	-2.93903	-1.13266	0.7626	-0.672611
YDR483W	KRE2	-5.26962	-4.61597	-1.93665	0.0920321	-1.0269
YDR484W	VPS52	-4.20876	-2.69453	-1.70497	-0.0277823	-0.252684
YDR485C	VPS72	-3.71381	-2.74636	-1.63226	0.11356	-0.448437
YDR486C	VPS60	-3.75787	-2.83848	-1.52349	0.136432	-0.526866
YDR487C	RIB3	-4.21467	-3.77809	-1.26409	-0.226751	-0.900088
YDR488C	PAC11	-3.73551	-3.28604	-1.67629	0.174466	-0.8213
YDR489W	SLD5	-3.68607	-3.42019	-1.77125	0.217027	-0.854826
YDR490C	PKH1	-3.40314	-3.28679	-1.33572	0.183199	-1.31337
YDR492W	IZH1	-4.83998	-4.30886	-1.47162	0.190462	-1.35726
YDR493W	MZM1	-3.88166	-2.94213	-1.36917	0.00705588	-0.408427
YDR494W	RSM28	-3.53471	-2.64211	-1.4816	0.0586324	-0.373054
YDR495C	VPS3	-4.28101	-2.61112	-1.58636	0.127304	-0.478806
YDR496C	PUF6	-5.12744	-3.92299	-2.1523	0.594051	-1.24486
YDR497C	ITR1	-3.99457	-3.20399	-1.54788	0.220629	-1.07286
YDR498C	SEC20	-3.63757	-2.81378	-1.53282	0.122353	-0.772346
YDR499W	LCD1	-4.12901	-3.28016	-1.92562	0.228002	-0.58816
YDR500C	RPL37B	-6.3476	-5.50463	-2.65857	0.274311	-1.88127
YDR501W	PLM2	-3.50761	-3.28861	-2.34638	0.40042	-1.0606
YDR502C	SAM2	-4.28968	-3.70589	-1.3066	0.0239442	-1.3486
YDR503C	LPP1	-3.6962	-3.32747	-1.87721	0.260521	-0.81909
YDR504C	SPG3	-3.593	-3.58132	-2.35013	0.0369586	-0.684417
YDR505C	PSP1	-4.52912	-4.17647	-1.82976	0.0396622	-0.992508
YDR506C	GMC1	-3.64215	-3.11739	-1.75791	-0.0932697	-0.359416
YDR507C	GIN4	-4.32227	-3.68802	-1.65988	0.365824	-1.30334
YDR508C	GNP1	-5.34532	-4.59694	-0.758711	0.120247	-1.42077
YDR510W	SMT3	-5.58211	-4.76884	-1.93878	0.164931	-1.33337
YDR511W	SDH7	-3.69525	-3.05226	-1.34261	0.0572317	-0.516323
YDR512C	EMI1	-3.975	-3.2719	-1.5341	0.108177	-0.647587
YDR513W	GRX2	-3.94068	-3.49689	-1.67366	0.0658385	-0.577077
YDR514C	YDR514C	-4.098	-3.74017	-1.73022	0.13859	-0.884052
YDR515W	SLF1	-4.46779	-3.6189	-1.77736	0.16021	-1.14279
YDR516C	EMI2	-3.01552	-2.58744	-1.2684	0.160112	-0.433961
YDR517W	GRH1	-4.25636	-3.86137	-1.60543	0.135221	-1.0715
YDR518W	EUG1	-3.36907	-3.2107	-1.56813	0.178276	-1.24866
YDR519W	FPR2	-3.47305	-2.78729	-1.59436	0.168496	-0.580736
YDR520C	URC2	-3.09009	-2.27394	-1.02195	0.391888	-0.173717
YDR522C	SPS2	-3.03198	-2.38955	-1.82745	0.505655	-1.02621
YDR523C	SPS1	-2.77391	-3.0641	-1.44957	0.0628668	-0.703326
YDR524C	AGE1	-4.93768	-4.26455	-1.98992	0.239609	-1.4539
YDR524C-B	YDR524C-B	-4.63051	-4.2067	-0.464259	0.30209	-1.0338
YDR524W-C	YDR524W-C	-4.80342	-4.14238	-0.598617	0.210789	-1.05854
YDR525W-A	SNA2	-5.81798	-5.91891	-1.45296	-0.0560903	-2.09456
YDR527W	RBA50	-6.01293	-5.59365	-1.83635	-0.0708783	-1.81014
YDR528W	HLR1	-3.81949	-3.25707	-1.46694	0.0816433	-0.758001
YDR529C	QCR7	-3.83222	-3.13695	-1.36931	0.346072	-0.768375
YDR530C	APA2	-3.95131	-3.11934	-0.873833	-0.0295436	-0.572908
YDR531W	CAB1	-4.36607	-3.71289	-1.09915	0.0634108	-0.81235
YDR532C	KRE28	-3.75479	-2.98126	-1.4208	-0.121461	-0.454654
YDR533C	HSP31	-4.33915	-3.67495	-2.00974	0.269485	-0.974936
YDR534C	FIT1	-3.60907	-3.50853	-1.71381	0.392826	-1.09141
YDR536W	STL1	-2.61393	-2.44931	-1.8088	0.276195	-0.627636
YDR538W	PAD1	-3.65314	-3.27013	-1.72582	0.102681	-0.629837
YDR539W	FDC1	-3.92179	-3.00212	-2.07772	0.245199	-0.596087
YDR540C	IRC4	-4.12176	-3.05397	-1.92606	0.149349	-0.344918
YDR541C	YDR541C	-3.66751	-3.14624	-2.15749	0.350708	-0.979186
YDR542W	PAU10	-2.61316	-2.78507	-2.10509	0.519528	-0.312872
YDR545W	YRF1-1	-3.50661	-3.4106	-1.89943	0.385459	-0.991452
YEL001C	IRC22	-4.16958	-3.39047	-1.62466	0.101822	-0.702506
YEL002C	WBP1	-3.9298	-3.07146	-1.85157	0.0255237	-0.857536
YEL003W	GIM4	-4.70793	-3.43872	-2.13111	0.10685	-0.945781
YEL004W	YEA4	-3.61634	-2.84914	-1.47884	0.060582	-0.490131
YEL005C	VAB2	-3.59644	-2.84017	-1.51184	0.201342	-0.383185
YEL006W	YEA6	-4.28525	-3.57396	-1.86361	0.140426	-1.00484
YEL007W	MIT1	-4.67458	-3.52248	-1.18824	0.341843	-1.29164
YEL009C	GCN4	-5.40352	-4.9348	-1.5886	0.0568784	-1.79217
YEL011W	GLC3	-2.59743	-2.23425	-1.19452	0.395586	-0.593677
YEL012W	UBC8	-4.02855	-3.25326	-1.59923	0.210066	-0.962913
YEL013W	VAC8	-4.29378	-3.35471	-1.75629	0.0501183	-0.932094
YEL015W	EDC3	-4.1678	-3.56888	-1.87282	0.309617	-0.985141
YEL016C	NPP2	-4.19129	-3.42124	-1.92799	0.254576	-0.867255
YEL017C-A	PMP2	-5.80149	-4.6004	-1.84833	0.0993714	-1.69112
YEL017W	GTT3	-4.21855	-4.20368	-2.29626	0.239154	-1.40222
YEL018W	EAF5	-3.92812	-3.12621	-1.73411	0.0184852	-0.634347
YEL019C	MMS21	-3.84363	-3.05012	-1.73053	0.143264	-0.467442
YEL020C	YEL020C	-3.00419	-3.1658	-1.50679	0.198361	-0.705469
YEL020W-A	TIM9	-4.57173	-4.15576	-1.79126	0.406097	-1.04315
YEL021W	URA3	-3.41917	-4.2248	-0.682138	-0.192645	-2.02143
YEL022W	GEA2	-3.48213	-3.03465	-1.53418	0.211129	-0.803434
YEL023C	YEL023C	-4.10454	-3.11386	-1.84254	0.0936802	-0.772266
YEL024W	RIP1	-3.68635	-3.31072	-1.42948	0.180608	-0.388055
YEL025C	YEL025C	-4.74465	-4.06654	-1.759	0.0976005	-1.1734
YEL026W	SNU13	-6.47833	-6.08474	-2.45528	0.246368	-1.49079
YEL027W	VMA3	-5.63993	-5.31065	-2.17239	-0.0981018	-1.58553
YEL029C	BUD16	-4.00931	-3.29917	-1.33165	0.077152	-0.477757
YEL030W	ECM10	-3.0416	-2.15786	-1.19131	0.228021	-0.348545
YEL031W	SPF1	-3.84933	-3.47803	-1.72273	0.361745	-0.896473
YEL032W	MCM3	-4.97404	-4.27791	-1.55238	0.19544	-1.60185
YEL033W	MTC7	-4.67129	-4.46405	-1.23724	0.159351	-1.0868
YEL034W	HYP2	-5.45002	-5.19373	-1.26238	-0.0375914	-1.3443
YEL035C	UTR5	-5.47535	-5.24491	-1.28097	-0.0301619	-1.39739
YEL036C	ANP1	-4.92723	-4.51144	-1.88328	0.313424	-1.67887
YEL037C	RAD23	-4.91261	-4.10643	-2.0511	0.555113	-1.52185
YEL038W	UTR4	-3.61324	-3.16852	-1.10956	0.0578945	-0.728395
YEL039C	CYC7	-2.7413	-2.78156	-1.45728	0.2373	-0.952723
YEL040W	UTR2	-3.57861	-3.65886	-0.690444	0.222475	-0.641326
YEL041W	YEF1	-3.08368	-2.75153	-1.20689	0.276638	-0.721161
YEL042W	GDA1	-4.41177	-4.64209	-2.32683	0.124445	-1.01398
YEL043W	YEL043W	-3.82818	-3.06685	-1.36573	0.0575071	-0.703095
YEL044W	IES6	-5.14856	-4.85692	-1.40503	0.347545	-1.23846
YEL046C	GLY1	-4.26242	-4.31219	-0.657476	0.338643	-0.673985
YEL047C	FRD1	-4.39203	-4.04645	-0.98341	-0.0577659	-0.961434
YEL048C	TCA17	-4.66685	-4.40874	-1.71901	0.299588	-1.07957
YEL049W	PAU2	-2.78281	-2.59707	-1.00634	0.612145	-0.46758
YEL050C	RML2	-4.24314	-3.68382	-1.75276	0.184099	-0.939009
YEL051W	VMA8	-3.83318	-3.18924	-1.62291	-0.0305369	-0.865032
YEL052W	AFG1	-3.69843	-3.38459	-1.44396	0.108674	-0.438324
YEL053C	MAK10	-3.96121	-3.24054	-1.46867	0.139928	-0.504536
YEL054C	RPL12A	-6.2269	-5.58441	-2.84274	0.242183	-1.81065
YEL055C	POL5	-4.59439	-4.02596	-2.37342	0.10981	-1.07492
YEL056W	HAT2	-3.9188	-3.47832	-1.49419	0.0638906	-0.866598
YEL057C	YEL057C	-3.39195	-2.75426	-1.65731	0.394087	-0.944593
YEL058W	PCM1	-3.60747	-3.62413	-1.74139	0.200359	-0.800968
YEL059C-A	SOM1	-3.10973	-2.78219	-1.33053	0.357594	-0.774572
YEL060C	PRB1	-3.60442	-3.18065	-1.63102	0.558972	-1.10874
YEL061C	CIN8	-3.96632	-3.35516	-2.19656	0.660162	-1.0582
YEL062W	NPR2	-4.00236	-2.93516	-1.3993	0.0517939	-0.528242
YEL063C	CAN1	-5.51149	-4.35001	-1.38961	0.111879	-1.29593
YEL064C	AVT2	-3.91415	-2.97623	-1.46837	-0.184815	-0.291035
YEL065W	SIT1	-4.38916	-4.29518	-0.172205	0.273656	-0.927312
YEL066W	HPA3	-4.87144	-4.47623	-1.1467	0.193078	-1.11872
YEL067C	YEL067C	-4.1335	-3.53072	-0.707536	0.00340314	-0.886416
YEL068C	YEL068C	-3.79008	-3.19036	-1.19409	0.00704012	-0.689087
YEL069C	HXT13	-1.6196	-1.925	-1.83335	0.762289	-0.450832
YEL070W	DSF1	-2.14699	-2.31407	-1.5132	0.0975284	-0.381285
YEL071W	DLD3	-5.30862	-4.83548	-1.16653	0.361858	-1.07613
YEL072W	RMD6	-4.69168	-3.92767	-0.900057	0.0330915	-1.19876
YEL073C	YEL073C	-3.68582	-2.99262	-1.87984	0.172053	-0.57264
YEL075C	YEL075C	-3.98641	-3.21856	-1.91493	0.399458	-0.827406
YEL076C	YEL076C	-3.2333	-2.92737	-1.65591	0.42251	-0.283804
YEL076C-A	YEL076C-A	-3.2333	-2.92737	-1.65591	0.42251	-0.283804
YEL077C	YEL077C	-3.28692	-3.17131	-1.72248	0.0672028	-0.608748
YER001W	MNN1	-4.87905	-4.28231	-2.07975	0.325018	-1.21554
YER002W	NOP16	-5.35806	-4.16602	-2.78053	0.445386	-1.11438
YER003C	PMI40	-3.86348	-3.43449	-1.96844	0.434395	-1.00349
YER004W	FMP52	-3.99596	-3.88851	-1.80393	0.258052	-1.04273
YER005W	YND1	-4.23978	-3.36391	-1.70777	0.096958	-0.864416
YER006W	NUG1	-5.30664	-4.12182	-2.24931	0.282391	-0.909536
YER007C-A	TMA20	-3.91834	-3.32067	-1.75733	0.10767	-1.0214
YER007W	PAC2	-3.60997	-2.8281	-1.50236	-0.0869591	-0.428037
YER008C	SEC3	-3.5638	-2.95363	-1.40414	0.261366	-0.668176
YER009W	NTF2	-3.97084	-3.53297	-1.76429	0.294849	-0.883796
YER010C	YER010C	-3.30664	-2.9653	-1.14127	-0.0792638	-0.442991
YER011W	TIR1	-3.13654	-2.99998	-1.5419	0.781548	-0.962874
YER012W	PRE1	-4.97399	-4.07312	-2.20246	0.433759	-1.24899
YER013W	PRP22	-3.42942	-2.888	-1.60141	0.226004	-0.518402
YER014C-A	BUD25	-3.34098	-2.98266	-1.46466	0.350755	-0.540831
YER014W	HEM14	-3.18882	-2.93365	-0.902532	0.257395	-0.661728
YER015W	FAA2	-3.04349	-2.72123	-1.52119	0.416454	-0.717309
YER016W	BIM1	-3.90838	-3.12534	-1.65637	0.445234	-0.946915
YER017C	AFG3	-3.38058	-3.44224	-1.79396	0.144561	-0.755764
YER018C	SPC25	-4.28421	-4.03298	-2.01558	0.259895	-1.12585
YER019C-A	SBH2	-4.72816	-3.94672	-1.92242	0.354857	-0.975719
YER019W	ISC1	-4.05307	-3.82666	-1.8969	0.241901	-1.06916
YER020W	GPA2	-4.16864	-3.72073	-1.67002	0.221947	-1.00687
YER021W	RPN3	-5.2163	-4.54249	-2.14887	0.42122	-1.62429
YER022W	SRB4	-3.43665	-2.84354	-1.62868	0.046303	-0.428664
YER023W	PRO3	-3.44823	-3.17565	-1.50066	-0.0789029	-0.552216
YER024W	YAT2	-3.65098	-3.06356	0.134614	-0.22326	-0.608598
YER025W	GCD11	-4.7894	-4.19695	-2.05351	0.375597	-1.07821
YER026C	CHO1	-4.66912	-4.22257	-2.3915	0.226557	-1.65257
YER027C	GAL83	-3.96856	-3.60382	-1.89194	0.0519579	-0.624786
YER028C	MIG3	-5.29668	-4.37149	-1.66926	0.0681574	-1.43058
YER029C	SMB1	-3.89654	-2.99436	-1.61736	-0.058182	-0.693465
YER030W	CHZ1	-4.30432	-2.69845	-1.50256	-0.159106	-0.72997
YER031C	YPT31	-4.13998	-3.69674	-1.60412	0.0797969	-0.956403
YER032W	FIR1	-3.80979	-3.34392	-1.44677	0.369908	-1.01382
YER033C	ZRG8	-3.67935	-2.68716	-1.19426	0.058037	-0.793861
YER034W	YER034W	-5.14594	-4.47931	-1.59184	-0.128154	-1.29702
YER035W	EDC2	-4.63679	-4.15836	-1.43892	0.295309	-1.34992
YER036C	ARB1	-5.77916	-4.67645	-1.99214	0.126548	-1.25584
YER037W	PHM8	-4.35529	-3.70106	-1.68259	0.185554	-0.852182
YER038C	KRE29	-3.59544	-2.76447	-1.42687	0.00985534	-0.311371
YER038W-A	YER038W-A	-3.51821	-2.75437	-1.65281	0.139978	-0.221521
YER039C	HVG1	-3.26577	-3.00051	-0.973734	-0.0376903	-0.362661
YER039C-A	YER039C-A	-3.26577	-3.00051	-0.973734	-0.0376903	-0.362661
YER040W	GLN3	-3.51703	-3.23634	-0.55565	0.00428704	-0.414201
YER041W	YEN1	-3.49181	-2.57049	-1.21702	0.0885951	-0.491918
YER042W	MXR1	-3.63958	-3.10801	-1.27988	0.360788	-1.03699
YER043C	SAH1	-5.63007	-4.88308	-1.87938	0.0967904	-1.49363
YER044C	ERG28	-4.84293	-3.97863	-1.89247	0.233455	-1.50545
YER044C-A	MEI4	-3.32522	-2.99485	-1.28915	-0.114686	-0.443871
YER045C	ACA1	-4.21067	-3.35047	-1.42741	-0.0694751	-0.779619
YER046W	SPO73	-3.72654	-3.41297	-1.27703	0.49111	-0.898594
YER047C	SAP1	-3.7227	-2.72698	-1.52383	-0.173135	-0.715907
YER048C	CAJ1	-4.33486	-3.91609	-1.5116	0.168033	-0.702333
YER048W-A	ISD11	-4.06065	-3.41806	-1.85684	0.201815	-0.941037
YER049W	TPA1	-4.69045	-3.5359	-1.28592	-0.141809	-0.813341
YER050C	RSM18	-3.4818	-2.59709	-1.46485	0.169168	-0.592192
YER051W	JHD1	-3.50774	-3.00549	-1.25714	0.0690657	-0.319648
YER052C	HOM3	-5.28287	-4.54964	-0.694197	0.0661136	-1.20498
YER053C	PIC2	-4.06632	-3.41402	-1.09825	0.114027	-0.851933
YER053C-A	YER053C-A	-3.64651	-3.53431	-2.17146	0.670235	-0.817275
YER054C	GIP2	-3.48224	-2.36268	-1.81298	0.227068	-0.213809
YER055C	HIS1	-5.46516	-4.70402	-0.89876	-0.061659	-1.10499
YER056C	FCY2	-5.45249	-4.51323	-0.684503	0.126471	-1.65594
YER056C-A	RPL34A	-6.39346	-5.99103	-2.58183	0.113199	-1.83295
YER057C	HMF1	-4.46832	-4.06663	-1.82498	-0.164043	-1.00004
YER058W	PET117	-3.65936	-3.09394	-1.24099	0.13204	-0.749242
YER059W	PCL6	-4.06865	-3.48121	-1.53193	0.245446	-1.02154
YER060W	FCY21	-4.14397	-3.77792	-3.10818	0.699433	-0.874026
YER060W-A	FCY22	-2.71482	-2.65417	-2.14592	0.317228	-0.282986
YER061C	CEM1	-3.49441	-2.98151	-1.14988	0.170471	-0.662627
YER062C	GPP2	-4.07041	-3.91825	-1.97856	0.222996	-0.936584
YER063W	THO1	-4.50231	-3.71011	-1.53367	0.163565	-0.959334
YER064C	VHR2	-4.21752	-3.58326	-0.677413	-0.057132	-0.902113
YER065C	ICL1	-4.24633	-3.92426	-2.21854	0.0258169	-1.34918
YER066W	RRT13	-3.74068	-3.06141	-1.48324	0.107296	-0.54991
YER067W	RGI1	-3.49776	-3.02016	-1.34263	0.0665516	-0.688107
YER068W	MOT2	-4.80126	-4.05116	-2.22596	0.288515	-1.24294
YER069W	ARG5,6	-3.83116	-3.62066	-0.29811	0.171441	-0.750798
YER070W	RNR1	-3.43379	-3.00642	-1.11829	0.601927	-0.810369
YER071C	TDA2	-5.10032	-3.85196	-1.71102	0.0522122	-1.04437
YER072W	VTC1	-5.33231	-4.84466	-1.76626	0.0896449	-1.34788
YER073W	ALD5	-4.87904	-3.90636	-1.15732	0.394317	-0.96901
YER074W	RPS24A	-6.40971	-5.76582	-2.69008	0.178606	-1.93738
YER074W-A	YOS1	-3.87103	-2.82456	-1.72107	0.0779996	-0.541427
YER075C	PTP3	-5.05557	-4.92437	-1.50147	0.24597	-1.23245
YER076C	YER076C	-3.67843	-2.91768	-1.91482	0.242106	-0.536478
YER077C	YER077C	-4.35253	-3.28177	-1.72418	0.213451	-0.687553
YER078C	ICP55	-4.06034	-3.20927	-1.56196	0.0734389	-1.0104
YER078W-A	YER078W-A	-3.93136	-3.22085	-1.60774	0.138731	-1.00827
YER079W	YER079W	-3.86031	-3.16025	-1.26388	0.0750942	-0.824368
YER080W	AIM9	-4.07907	-3.60447	-1.90663	0.0678284	-0.878923
YER081W	SER3	-3.65691	-3.13784	-0.832193	0.110128	-0.829548
YER082C	UTP7	-4.89633	-3.71867	-1.89146	0.364336	-1.02782
YER083C	GET2	-3.83619	-3.42954	-1.48463	0.193818	-0.485177
YER084W	YER084W	-3.80413	-3.40997	-1.50238	0.198682	-0.488638
YER085C	YER085C	-4.20843	-3.91268	-1.27025	-0.106937	-0.620586
YER086W	ILV1	-4.71773	-4.37819	-0.756003	-0.0653522	-0.724969
YER087C-B	SBH1	-4.35656	-4.17101	-2.00898	0.206024	-1.1709
YER087W	AIM10	-3.65584	-2.79085	-1.24858	-0.0608182	-0.416388
YER088C	DOT6	-4.91712	-4.2507	-1.81465	0.205597	-0.84685
YER089C	PTC2	-5.62947	-4.43018	-1.60601	-0.0605353	-1.57813
YER090W	TRP2	-4.4353	-3.69867	-0.79149	-0.0719995	-1.09304
YER091C	MET6	-4.41016	-3.99886	-0.600599	-0.103391	-1.20026
YER092W	IES5	-4.82696	-3.68684	-0.834554	0.0656833	-1.62468
YER093C	TSC11	-3.48282	-2.7228	-1.35533	-0.125876	-0.256289
YER093C-A	AIM11	-3.27875	-2.51792	-1.32704	0.171394	-0.518005
YER094C	PUP3	-4.56654	-4.43826	-2.12602	0.563278	-1.87007
YER095W	RAD51	-4.24796	-4.53876	-2.11951	0.352228	-1.5852
YER096W	SHC1	-2.48692	-2.21244	-1.63857	0.41598	-0.621996
YER098W	UBP9	-3.00611	-2.5447	-1.30354	0.347616	-0.818542
YER099C	PRS2	-3.40046	-3.36607	-1.57593	-0.0267576	-0.575889
YER100W	UBC6	-4.04633	-3.3283	-1.77353	0.00499411	-0.785415
YER101C	AST2	-4.11208	-3.11293	-1.82803	-0.0160079	-0.557938
YER102W	RPS8B	-5.34353	-4.60435	-2.86021	0.247681	-1.40549
YER103W	SSA4	-3.70347	-2.76147	-1.96267	0.311516	-0.403715
YER104W	RTT105	-3.50086	-2.82435	-2.039	0.333465	-0.489297
YER105C	NUP157	-3.57433	-2.85369	-1.75796	0.106487	-0.545236
YER106W	MAM1	-3.10099	-2.35224	-1.87513	0.520493	-0.410053
YER107C	GLE2	-4.22918	-3.49966	-1.89087	0.00592527	-0.523681
YER109C	FLO8	-3.90677	-3.52945	-1.52061	0.18725	-0.96144
YER110C	KAP123	-4.5817	-4.29679	-2.31552	0.172024	-1.19571
YER111C	SWI4	-4.17297	-3.26608	-1.72329	0.579153	-1.57235
YER112W	LSM4	-3.55453	-3.04139	-1.91486	0.0546299	-0.965404
YER113C	TMN3	-3.7442	-3.22716	-1.76105	0.135355	-1.04876
YER114C	BOI2	-4.03053	-3.53386	-2.09676	0.292439	-1.23099
YER115C	SPR6	-5.02525	-4.01615	-2.76771	0.158837	-0.975607
YER116C	SLX8	-4.04336	-3.2528	-1.90196	-0.0622703	-0.937387
YER117W	RPL23B	-6.26264	-5.5923	-2.87945	0.38683	-2.0026
YER118C	SHO1	-4.05699	-3.12062	-1.94489	0.526581	-0.559893
YER119C	AVT6	-3.61737	-3.42358	-1.51907	0.0942265	-0.856701
YER120W	SCS2	-4.55407	-3.90793	-1.92729	0.286664	-1.14981
YER121W	YER121W	-2.80621	-2.25888	-1.29121	0.254801	-0.180858
YER122C	GLO3	-4.20467	-3.86453	-1.85068	0.192088	-1.0833
YER123W	YCK3	-3.73785	-3.48802	-1.3779	0.272197	-1.17753
YER124C	DSE1	-3.98326	-3.3341	-1.43452	0.40411	-1.07337
YER125W	RSP5	-4.34527	-3.9908	-1.93953	0.303094	-1.27219
YER126C	NSA2	-5.10653	-4.45697	-2.20104	0.504346	-1.13199
YER127W	LCP5	-4.90582	-4.86924	-2.03513	0.395549	-1.30526
YER128W	VFA1	-3.48875	-2.7962	-1.1341	-0.0566327	-0.519222
YER129W	SAK1	-4.19258	-3.48441	-1.64132	0.209415	-1.03362
YER130C	COM2	-4.5016	-4.3591	-1.91743	0.121867	-1.28334
YER131W	RPS26B	-6.32685	-5.99231	-2.8021	0.207776	-2.2233
YER132C	PMD1	-4.47377	-3.51691	-1.86024	0.199888	-0.915529
YER133W	GLC7	-5.77497	-4.78343	-2.07023	0.325504	-1.86566
YER134C	YER134C	-3.68998	-3.25479	-1.61589	0.217012	-0.880031
YER136W	GDI1	-4.93838	-4.3471	-1.74286	0.239094	-1.2038
YER137C	YER137C	-3.46075	-2.91246	-1.73399	0.421215	-0.476911
YER137C-A	YER137C-A	-4.41025	-3.84545	-2.05686	0.247107	-0.4309
YER138C	YER138C	-4.41025	-3.84545	-2.05686	0.247107	-0.4309
YER138W-A	YER138W-A	-4.72031	-3.96483	-0.676287	0.151416	-1.00998
YER139C	RTR1	-3.99797	-3.13124	-1.14506	0.0559364	-0.729033
YER140W	EMP65	-4.06705	-3.13566	-1.35831	0.0736388	-0.711022
YER141W	COX15	-4.01163	-3.46675	-1.39902	0.0713512	-0.811619
YER142C	MAG1	-4.0007	-3.18848	-1.60713	0.354374	-0.805659
YER143W	DDI1	-3.55926	-3.27186	-1.34882	0.194147	-0.866379
YER144C	UBP5	-3.97158	-3.32681	-1.15219	-0.105917	-0.657746
YER145C	FTR1	-5.11952	-5.29778	-1.66007	0.284642	-1.3138
YER146W	LSM5	-4.88081	-4.53665	-1.6239	0.251782	-1.60861
YER147C	SCC4	-3.69015	-2.70235	-1.45277	0.184453	-0.534807
YER148W	SPT15	-4.45278	-3.92977	-1.63947	0.268138	-1.25192
YER149C	PEA2	-3.82565	-3.50588	-1.66285	0.111662	-0.772022
YER150W	SPI1	-3.26432	-3.10855	-1.25488	0.537992	-0.695887
YER151C	UBP3	-4.37985	-4.00762	-1.84961	-0.19992	-0.849213
YER152C	YER152C	-4.24068	-3.95731	-1.80759	0.187532	-0.824029
YER153C	PET122	-4.12171	-3.7105	-1.85519	0.23343	-0.740238
YER154W	OXA1	-3.95208	-3.81094	-1.70789	0.21375	-0.676838
YER155C	BEM2	-4.67789	-3.7327	-1.53255	0.00226378	-1.05074
YER156C	YER156C	-4.50915	-3.91338	-1.908	0.277997	-1.09576
YER157W	COG3	-4.08046	-3.44036	-1.67078	0.132278	-0.723859
YER158C	YER158C	-4.50343	-4.09975	-1.35946	0.530395	-1.32466
YER159C	BUR6	-3.85374	-4.11518	-1.59535	0.327324	-1.67141
YER159C-A	YER159C-A	-4.31322	-3.43614	-1.27429	0.140735	-0.399334
YER160C	YER160C	-4.31322	-3.43614	-1.27429	0.140735	-0.399334
YER161C	SPT2	-4.21115	-2.81297	-1.18963	0.0289177	-0.680866
YER162C	RAD4	-3.66395	-2.98139	-1.63064	0.401095	-0.459031
YER163C	GCG1	-3.79377	-3.78662	-1.64916	0.0384637	-0.820795
YER164W	CHD1	-3.61056	-2.68549	-1.24542	0.0394097	-0.581765
YER165W	PAB1	-5.86616	-4.99727	-2.14903	0.048928	-1.49047
YER166W	DNF1	-4.17002	-3.80349	-1.91666	0.154627	-1.1807
YER167W	BCK2	-3.72392	-3.24993	-1.64305	0.107094	-0.655732
YER168C	CCA1	-3.8943	-3.32294	-1.27844	0.144108	-0.697808
YER169W	RPH1	-5.36982	-5.41753	-2.00907	0.158871	-1.33836
YER170W	ADK2	-3.68186	-3.32135	-1.65841	0.332128	-0.496557
YER171W	RAD3	-3.66771	-2.91053	-1.60281	-0.0380718	-0.722212
YER172C	BRR2	-3.39717	-2.60447	-1.32113	0.207735	-0.659299
YER173W	RAD24	-3.3585	-2.53677	-1.42488	0.121489	-0.413767
YER174C	GRX4	-3.38734	-2.8455	-2.89021	0.535016	-0.519096
YER175C	TMT1	-4.17875	-3.41124	0.139689	0.10811	-0.850378
YER175W-A	YER175W-A	-4.39152	-3.45635	-0.324375	-0.00564542	-0.984783
YER176W	ECM32	-3.50149	-3.35529	-1.87143	-0.223565	-0.665362
YER177W	BMH1	-6.59426	-6.21023	-1.70797	0.187094	-1.82465
YER178W	PDA1	-4.6151	-4.31692	-1.053	0.0782132	-1.14115
YER179W	DMC1	-2.80235	-2.48888	-1.64402	0.318192	-0.259454
YER180C	ISC10	-4.21664	-3.05549	-2.03687	-0.0204678	-0.453221
YER180C-A	SLO1	-4.39962	-3.88851	-2.14656	0.0479552	-0.82135
YER182W	FMP10	-3.49562	-2.32102	-1.56776	0.137046	-0.121539
YER183C	FAU1	-3.36356	-2.67926	-1.48838	0.200712	-0.421422
YER184C	TOG1	-3.62208	-3.36688	-1.48505	0.286627	-0.818135
YER185W	PUG1	-3.41767	-3.11151	-1.55431	0.189917	-1.00571
YER186C	YER186C	-4.28472	-3.26114	-1.70889	0.14094	-0.686962
YER187W	YER187W	-2.9299	-2.56676	-2.44346	0.98526	-0.69446
YER188C-A	YER188C-A	-3.46008	-3.38639	-2.61595	1.28028	-0.317594
YER189W	YER189W	-3.62975	-3.35937	-1.68438	0.306741	-0.841367
YER190W	YRF1-2	-3.62975	-3.35937	-1.68438	0.306741	-0.841367
YFL001W	DEG1	-4.51358	-3.65387	-2.05111	0.174457	-0.892654
YFL002C	SPB4	-4.06068	-3.4356	-1.89908	0.24157	-0.919776
YFL002W-A	YFL002W-A	-3.7646	-3.16365	-1.43426	0.404709	-0.427109
YFL002W-B	YFL002W-B	-3.7646	-3.16365	-1.43426	0.404709	-0.427109
YFL003C	MSH4	-4.17842	-3.08009	-2.54967	0.0669495	-0.349245
YFL004W	VTC2	-4.60484	-3.77777	-2.0903	0.129855	-0.688379
YFL005W	SEC4	-3.87786	-2.89793	-1.65447	0.204512	-0.771894
YFL007W	BLM10	-3.94034	-3.18657	-2.03227	0.489997	-1.30071
YFL008W	SMC1	-3.76965	-3.10781	-1.60239	0.401804	-1.04262
YFL009W	CDC4	-4.40271	-3.26506	-1.35332	0.0747634	-0.661096
YFL010C	WWM1	-4.10954	-3.2561	-1.24205	0.0773932	-0.705326
YFL010W-A	AUA1	-2.01972	-1.54595	-1.66861	0.511399	0.0857483
YFL011W	HXT10	-3.05579	-2.56154	-1.47051	0.667302	-0.270496
YFL012W	YFL012W	-3.23411	-2.7181	-1.80654	0.319015	-0.623352
YFL013C	IES1	-3.87685	-3.00176	-1.23103	0.141813	-0.465947
YFL014W	HSP12	-2.46163	-2.3458	-1.65191	0.51742	-0.0662872
YFL016C	MDJ1	-5.1505	-4.58628	-1.21051	0.0935099	-1.30524
YFL017C	GNA1	-4.44801	-3.68943	-1.53677	0.0694262	-0.836713
YFL017W-A	SMX2	-3.80742	-3.34719	-1.49079	0.127662	-0.996148
YFL018C	LPD1	-3.44909	-3.23317	-1.11866	-0.0902761	-0.825583
YFL020C	PAU5	-2.99577	-3.06692	-1.71415	0.47371	-0.399747
YFL021W	GAT1	-4.61348	-4.16805	-1.19148	-0.109152	-1.23191
YFL022C	FRS2	-4.92429	-4.6496	-1.49292	0.302782	-1.08856
YFL023W	BUD27	-3.97048	-3.48098	-1.91821	0.234803	-0.611339
YFL024C	EPL1	-6.01102	-5.72395	-1.86645	0.555433	-1.89685
YFL025C	BST1	-3.99094	-3.51671	-1.68853	0.118563	-0.774966
YFL026W	STE2	-2.91237	-2.5173	-1.61597	0.406848	-0.485276
YFL027C	GYP8	-3.62442	-2.33852	-1.13276	0.106913	-0.523499
YFL028C	CAF16	-3.98045	-3.20732	-0.686078	-0.0509948	-0.327645
YFL029C	CAK1	-3.35868	-2.5156	-1.70764	-0.113642	-0.214436
YFL030W	AGX1	-3.3676	-2.48884	-1.2615	0.227514	-0.264485
YFL031W	HAC1	-4.95687	-4.54115	-1.87742	0.405515	-1.30708
YFL033C	RIM15	-4.58682	-3.98077	-1.91142	0.27881	-1.02344
YFL034C-A	RPL22B	-5.96662	-5.61428	-2.57734	0.300473	-1.96403
YFL034C-B	MOB2	-4.42794	-3.59118	-1.91259	0.0585333	-0.913435
YFL034W	YFL034W	-3.67939	-3.07234	-1.78253	0.157817	-0.647811
YFL036W	RPO41	-3.89503	-3.52854	-1.88071	-0.068609	-0.766971
YFL037W	TUB2	-4.0479	-3.92284	-2.09228	0.227443	-1.68292
YFL038C	YPT1	-4.54964	-4.39769	-1.72736	0.257117	-1.26297
YFL039C	ACT1	-5.41914	-4.24183	-2.04778	0.125057	-1.62317
YFL040W	YFL040W	-2.66453	-2.19447	-1.57654	-0.610267	-0.429691
YFL041W	FET5	-3.41168	-2.456	-1.14748	0.0342473	-0.471727
YFL041W-A	YFL041W-A	-3.2801	-2.47154	-1.25713	0.0218829	-0.241222
YFL042C	YFL042C	-3.3431	-2.44471	-1.10663	-0.0251391	-0.18519
YFL044C	OTU1	-3.89272	-2.958	-1.67307	0.305194	-0.552089
YFL045C	SEC53	-4.72876	-3.96096	-2.3626	0.0542879	-1.0465
YFL046W	FMP32	-3.4258	-2.62539	-1.33085	0.0479983	-0.51391
YFL047W	RGD2	-3.37521	-3.2973	-1.537	0.0595686	-0.592404
YFL048C	EMP47	-3.35111	-2.79334	-1.52927	0.182131	-0.51864
YFL049W	SWP82	-4.10541	-2.55337	-1.63458	-0.116272	-0.674351
YFL050C	ALR2	-3.62924	-2.6017	-1.53375	0.193565	-0.632566
YFL051C	YFL051C	-3.14815	-2.73595	-1.91004	0.290294	-0.362457
YFL052W	YFL052W	-2.92626	-2.36895	-1.14003	-0.222027	-1.19555
YFL053W	DAK2	-2.96342	-2.38136	-2.07733	-0.0218524	-0.179765
YFL054C	YFL054C	-2.7841	-2.72991	-1.27789	-0.158198	-0.531002
YFL055W	AGP3	-3.96138	-2.86888	-1.24946	0.301907	-0.792306
YFL058W	THI5	-1.91191	-1.29869	-1.48088	0.510005	-0.532054
YFL059W	SNZ3	-3.02203	-2.50444	-1.58566	0.143575	-0.48236
YFL060C	SNO3	-3.66088	-2.93723	-2.11262	0.0142644	-0.677465
YFL061W	DDI2	-2.76666	-2.4327	-1.69265	0.482245	-0.854579
YFL062W	COS4	-2.96692	-2.53671	-2.05492	0.113719	-0.202059
YFL064C	YFL064C	-3.35647	-3.02975	-2.03404	0.373279	-0.892163
YFL065C	YFL065C	-3.03565	-2.31358	-1.8223	0.478936	-0.360257
YFL066C	YFL066C	-3.28792	-3.21933	-1.56274	0.166406	-0.768165
YFR001W	LOC1	-4.69891	-3.86082	-2.006	0.243625	-0.721071
YFR002W	NIC96	-3.76698	-3.33808	-1.95405	0.300859	-0.591887
YFR003C	YPI1	-4.57795	-3.512	-1.74988	0.32239	-1.03442
YFR004W	RPN11	-4.60599	-3.73674	-1.8509	0.482129	-0.95067
YFR005C	SAD1	-4.48124	-3.8767	-1.59902	0.200317	-1.21071
YFR006W	YFR006W	-4.27157	-3.46563	-1.56611	0.137733	-0.849251
YFR007W	YFH7	-3.22177	-2.58922	-1.46008	0.196803	-0.27879
YFR008W	FAR7	-3.40754	-2.33555	-1.38358	0.189509	-0.269965
YFR009W	GCN20	-3.95018	-3.65591	-1.68927	0.323279	-0.855802
YFR010W	UBP6	-3.48047	-3.25554	-1.93295	0.0984096	-0.759644
YFR011C	MIC19	-3.72765	-3.00852	-1.83581	0.0970561	-0.454434
YFR012W	DCV1	-3.4969	-1.9607	-1.52908	0.44551	-0.41035
YFR012W-A	YFR012W-A	-2.61971	-2.96209	-1.62284	0.436359	-0.357741
YFR013W	IOC3	-3.1012	-2.60085	-1.4083	-0.0235551	-0.419043
YFR014C	CMK1	-3.39248	-3.12476	-1.62131	0.0267899	-1.24693
YFR015C	GSY1	-2.97593	-2.49753	-0.830403	0.115934	-0.812317
YFR016C	YFR016C	-3.40219	-3.02822	-1.90739	0.108725	-0.868224
YFR017C	IGD1	-3.1967	-3.50899	-1.01332	0.286406	-0.885755
YFR018C	YFR018C	-3.76564	-3.81827	-1.82899	0.126215	-0.621409
YFR019W	FAB1	-3.57876	-3.16145	-1.76487	0.364081	-0.478729
YFR020W	YFR020W	-3.8466	-3.38606	-2.1577	0.033216	-0.402789
YFR021W	ATG18	-3.77889	-3.10502	-1.59503	-0.0553629	-0.508101
YFR022W	ROG3	-3.8014	-3.13066	-1.7647	0.0944514	-0.937167
YFR023W	PES4	-2.63866	-1.80929	-2.05452	0.473057	-0.504222
YFR024C-A	LSB3	-4.68174	-3.86878	-1.52612	0.155841	-1.33649
YFR025C	HIS2	-3.56912	-3.17892	-1.05339	-0.136751	-0.547525
YFR026C	ULI1	-3.95876	-2.84886	-1.86706	-0.0968633	-0.714447
YFR027W	ECO1	-3.30304	-2.80891	-1.58423	0.11765	-0.547551
YFR028C	CDC14	-3.83154	-3.36823	-1.70132	0.0730303	-0.992447
YFR029W	PTR3	-3.49819	-3.37604	-1.126	0.0376849	-0.681581
YFR030W	MET10	-3.55456	-3.52725	-0.652438	-0.077447	-0.786478
YFR031C	SMC2	-3.63588	-3.29792	-2.01459	0.297614	-0.589099
YFR031C-A	RPL2A	-5.85819	-5.60317	-2.67954	0.207051	-1.83148
YFR032C	RRT5	-4.27245	-3.7808	-2.81396	0.427109	-1.28803
YFR032C-A	RPL29	-6.96401	-6.36014	-3.13483	0.177901	-2.18738
YFR032C-B	YFR032C-B	-5.82274	-5.44199	-2.52941	0.350637	-2.25047
YFR033C	QCR6	-4.04186	-4.09517	-2.23514	0.483511	-0.72552
YFR034C	PHO4	-5.02385	-4.50567	-1.25064	0.250515	-1.5294
YFR035C	YFR035C	-4.52695	-4.50803	-2.11525	0.363482	-1.41786
YFR036W	CDC26	-4.13683	-3.20884	-1.66136	0.11845	-0.585801
YFR037C	RSC8	-3.969	-2.80292	-1.76202	0.151654	-0.666239
YFR038W	IRC5	-3.9329	-3.11915	-1.79557	0.0524991	-0.500753
YFR039C	OSW7	-3.80074	-3.10785	-1.83736	-0.00213219	-0.52617
YFR040W	SAP155	-4.76568	-3.70132	-1.84229	0.00768887	-1.07046
YFR041C	ERJ5	-3.8781	-2.74329	-1.67684	0.0532781	-0.729523
YFR042W	KEG1	-3.64858	-2.74924	-1.49083	0.128328	-0.66297
YFR043C	IRC6	-3.48918	-2.32134	-1.5469	-0.0670041	-0.222334
YFR044C	DUG1	-3.17321	-2.63754	-1.28304	0.0315991	-0.371395
YFR045W	YFR045W	-2.96492	-2.12718	-1.17028	0.116416	-0.273018
YFR046C	CNN1	-3.45293	-2.32204	-1.35454	0.0530861	-0.200288
YFR047C	BNA6	-3.40926	-2.66005	-1.87703	0.0561444	-0.441561
YFR048W	RMD8	-3.42228	-2.69453	-1.6691	-0.0351889	-0.37628
YFR049W	YMR31	-2.9928	-2.11625	-1.19213	-0.138044	-0.301563
YFR050C	PRE4	-4.57925	-4.08079	-2.3781	0.379391	-1.34547
YFR051C	RET2	-4.13491	-3.61842	-2.01374	0.377159	-1.23931
YFR052W	RPN12	-4.78649	-4.11659	-1.96765	0.572537	-1.40597
YFR053C	HXK1	-2.49635	-2.15824	-0.631744	0.306127	-0.481203
YFR055W	IRC7	-3.75925	-3.1889	-1.14511	0.0828486	-0.923257
YFR057W	YFR057W	-2.66608	-2.96813	-2.25742	0.0223683	-0.623711
YGL001C	ERG26	-4.33863	-3.5706	-1.9321	0.0407908	-0.817294
YGL002W	ERP6	-4.21054	-3.1252	-1.5811	0.0385176	-0.614832
YGL003C	CDH1	-4.04447	-3.65198	-1.72415	0.0521643	-0.619278
YGL004C	RPN14	-3.88616	-3.20548	-1.73771	0.210532	-0.533577
YGL005C	COG7	-3.62639	-2.97627	-1.659	0.242362	-0.454153
YGL006W	PMC1	-4.05823	-3.35944	-1.89124	0.305477	-0.853736
YGL006W-A	YGL006W-A	-4.33929	-3.94529	-2.10647	0.198851	-0.987422
YGL007C-A	YGL007C-A	-3.58352	-3.38936	-0.360161	0.198847	-0.568786
YGL008C	PMA1	-4.08924	-3.48603	0.0583516	0.256855	-0.542485
YGL009C	LEU1	-3.67126	-3.56795	-0.275298	0.42511	-1.05215
YGL010W	MPO1	-3.90493	-3.01447	-1.74932	0.285154	-0.912918
YGL011C	SCL1	-4.12987	-3.73729	-1.89365	0.547865	-1.25793
YGL012W	ERG4	-4.69644	-4.9725	-1.3533	0.231097	-1.51671
YGL013C	PDR1	-4.41871	-3.96907	-1.26183	0.156879	-1.37361
YGL014W	PUF4	-4.56902	-3.2107	-1.49666	0.118584	-1.09742
YGL015C	YGL015C	-3.6644	-2.78735	-1.89923	0.192784	-0.759162
YGL016W	KAP122	-3.68035	-2.83377	-1.69456	0.203322	-0.382875
YGL017W	ATE1	-3.26473	-2.64216	-1.32878	0.0296293	-0.228252
YGL018C	JAC1	-3.27093	-2.68775	-1.24992	-0.0351291	-0.235189
YGL019W	CKB1	-3.61299	-2.66583	-1.57572	0.313101	-0.419859
YGL020C	GET1	-3.69271	-2.56761	-1.47094	0.275586	-0.582012
YGL021W	ALK1	-4.61184	-3.71523	-2.21555	0.312006	-0.990637
YGL022W	STT3	-3.45175	-3.12207	-1.72675	0.189186	-0.664902
YGL023C	PIB2	-3.43861	-2.96157	-1.40703	0.0149154	-0.327992
YGL025C	PGD1	-3.10826	-2.91046	-1.46926	-0.17354	-0.440329
YGL026C	TRP5	-4.34596	-3.65441	-0.48028	0.0288097	-0.610496
YGL027C	CWH41	-3.68223	-3.10646	-1.47082	0.0215082	-0.619007
YGL028C	SCW11	-3.65983	-3.24469	-1.31829	0.101812	-0.398545
YGL029W	CGR1	-5.22987	-4.29157	-2.37261	0.262326	-1.19038
YGL030W	RPL30	-6.23711	-5.40532	-2.60901	0.298736	-1.81825
YGL031C	RPL24A	-5.36462	-4.35544	-2.48803	0.321423	-0.790919
YGL032C	AGA2	-2.48991	-2.25282	-1.06494	0.620749	-0.496183
YGL033W	HOP2	-2.47815	-2.18018	-1.20144	0.595287	-0.511804
YGL035C	MIG1	-4.87575	-4.14719	-1.39616	0.0959752	-1.50573
YGL036W	YGL036W	-4.0223	-3.78895	-1.95372	0.163286	-1.26616
YGL037C	PNC1	-4.91214	-4.62327	-2.0422	0.369663	-1.97887
YGL038C	OCH1	-4.54045	-4.26721	-1.83378	0.179674	-1.35124
YGL039W	YGL039W	-4.01751	-3.33378	-1.42152	0.0302006	-1.00688
YGL040C	HEM2	-4.34465	-3.79509	-1.60838	0.241371	-0.938535
YGL041C-B	YGL041C-B	-3.65045	-2.84586	-1.44426	-0.0171693	-0.490033
YGL041W-A	YGL041W-A	-3.61522	-2.85775	-1.44209	-0.023159	-0.473291
YGL043W	DST1	-3.65632	-3.06283	-1.60919	0.223027	-0.825054
YGL044C	RNA15	-3.40881	-2.83698	-1.25394	0.0983534	-0.798919
YGL045W	RIM8	-3.75661	-3.29538	-1.19243	0.0835563	-0.74518
YGL047W	ALG13	-3.9846	-3.23507	-1.85132	0.216628	-1.14188
YGL048C	RPT6	-4.21252	-3.62535	-1.90899	0.446923	-1.46686
YGL049C	TIF4632	-3.85871	-3.23108	-1.77599	0.0121887	-0.505511
YGL050W	TYW3	-3.5651	-2.94105	-1.61978	0.257996	-0.403227
YGL051W	MST27	-3.48939	-2.98772	-1.43375	0.139364	-0.389974
YGL053W	PRM8	-3.76955	-2.87317	-1.90185	0.0374997	-0.567692
YGL054C	ERV14	-5.18822	-4.83375	-1.7601	0.246795	-1.57947
YGL055W	OLE1	-4.69594	-3.61455	-1.19422	0.125662	-1.26605
YGL056C	SDS23	-5.69702	-5.56167	-1.5799	-0.0709634	-1.82382
YGL057C	GEP7	-3.73614	-3.03959	-1.47047	0.0724781	-0.464848
YGL058W	RAD6	-4.77048	-4.0512	-1.97543	0.168446	-1.02584
YGL059W	PKP2	-3.31296	-3.22582	-0.906718	0.133879	-0.759218
YGL060W	YBP2	-3.99066	-2.7365	-1.40014	-0.25983	-0.344002
YGL061C	DUO1	-3.96499	-2.85125	-1.50785	-0.10627	-0.626166
YGL062W	PYC1	-4.56351	-4.36421	-1.07172	0.319191	-1.88685
YGL063W	PUS2	-3.92081	-3.18255	-1.45268	0.201531	-0.678948
YGL064C	MRH4	-3.64033	-2.42107	-1.23877	0.227107	-0.332537
YGL065C	ALG2	-3.73156	-3.0072	-1.47101	0.0246294	-0.471143
YGL066W	SGF73	-3.83508	-2.84148	-1.29867	0.040085	-0.715933
YGL067W	NPY1	-3.36497	-2.30605	-1.29821	0.106762	-0.356263
YGL068W	MNP1	-3.57242	-2.73378	-1.44893	0.110717	-0.588913
YGL070C	RPB9	-3.70944	-3.07579	-1.41431	0.0781683	-0.626917
YGL071W	AFT1	-5.07549	-4.98633	-1.60572	0.334542	-1.41835
YGL073W	HSF1	-4.39225	-3.83829	-1.20719	0.133629	-1.24904
YGL075C	MPS2	-4.03076	-3.78423	-1.74319	0.232292	-1.0998
YGL076C	RPL7A	-6.05572	-5.9452	-2.68842	0.196011	-2.09685
YGL077C	HNM1	-5.42136	-5.00402	-2.91706	0.136807	-2.06491
YGL078C	DBP3	-5.22668	-4.07956	-2.35982	0.329289	-1.06517
YGL079W	KXD1	-3.1403	-2.36926	-1.46113	0.178769	-0.606507
YGL080W	MPC1	-4.00746	-3.35585	-1.75361	0.243998	-0.719145
YGL081W	YGL081W	-2.98317	-2.40814	-1.5568	0.566141	-0.578437
YGL082W	YGL082W	-4.08248	-3.51112	-1.65904	0.252902	-1.04642
YGL083W	SCY1	-3.64248	-2.92324	-1.66384	0.264397	-0.516396
YGL084C	GUP1	-3.72564	-3.34457	-1.24353	-0.0415242	-0.867135
YGL085W	LCL3	-3.32655	-2.59812	-1.44109	0.0514174	-0.439468
YGL086W	MAD1	-3.43608	-2.96564	-1.55519	0.0909605	-0.488399
YGL087C	MMS2	-3.96914	-3.37381	-1.78731	0.226343	-0.735858
YGL089C	MF(ALPHA)2	-5.18558	-4.94494	-2.8859	0.468216	-1.21691
YGL090W	LIF1	-3.48223	-2.94473	-1.57349	0.108746	-0.248729
YGL091C	NBP35	-3.68491	-3.04465	-1.68723	0.182766	-0.352683
YGL092W	NUP145	-4.4381	-3.7383	-2.03373	0.390545	-0.830596
YGL093W	SPC105	-3.89389	-3.32088	-1.78714	0.389723	-1.18578
YGL094C	PAN2	-3.99062	-3.39277	-2.05006	0.124431	-1.21181
YGL095C	VPS45	-3.48135	-2.96801	-1.74788	0.377944	-0.350649
YGL096W	TOS8	-4.26356	-3.38288	-2.23916	0.492495	-0.726847
YGL097W	SRM1	-4.171	-3.33799	-1.73618	0.176609	-0.720787
YGL098W	USE1	-3.76448	-2.76488	-1.46358	0.103171	-0.555224
YGL099W	LSG1	-4.60666	-3.28936	-1.67646	0.221084	-0.655164
YGL100W	SEH1	-3.56163	-2.69768	-1.75204	0.203062	-0.499333
YGL101W	YGL101W	-3.87348	-3.21527	-1.8503	0.346673	-0.775421
YGL103W	RPL28	-6.48334	-5.79117	-2.76618	0.284467	-1.64495
YGL104C	VPS73	-3.66737	-2.78371	-1.78526	0.00247992	-0.659549
YGL105W	ARC1	-4.61039	-4.07447	-2.1293	0.331476	-1.1912
YGL106W	MLC1	-4.09568	-3.582	-1.6414	0.210442	-0.833605
YGL107C	RMD9	-3.8371	-3.2369	-1.6695	0.301437	-0.593194
YGL108C	YGL108C	-4.24624	-2.77707	-1.73158	0.00154537	-0.456128
YGL110C	CUE3	-3.5552	-2.76032	-1.68366	0.123631	-0.816252
YGL111W	NSA1	-3.92811	-3.22543	-1.95571	0.314167	-0.397108
YGL112C	TAF6	-3.56665	-3.03549	-1.91755	0.292813	-0.485264
YGL113W	SLD3	-3.67737	-2.90781	-1.79551	0.107162	-0.603669
YGL114W	YGL114W	-4.18162	-3.25115	-1.17163	0.0056049	-0.705965
YGL115W	SNF4	-3.98065	-3.15006	-1.65313	0.182216	-0.892382
YGL116W	CDC20	-4.75854	-4.19639	-2.02341	0.277985	-1.21631
YGL117W	YGL117W	-4.09855	-3.25325	-0.661569	0.0735294	-0.698581
YGL119W	COQ8	-4.13116	-3.23467	-1.30354	0.228199	-0.591544
YGL120C	PRP43	-5.1363	-4.5534	-2.08119	0.335039	-1.31714
YGL121C	GPG1	-4.32742	-3.48268	-1.83871	0.335972	-0.861713
YGL122C	NAB2	-4.99251	-5.04292	-2.29111	0.615946	-1.94118
YGL123W	RPS2	-6.295	-5.82267	-2.55344	0.172811	-1.82593
YGL124C	MON1	-4.52068	-3.68559	-1.80215	0.0297013	-0.969541
YGL125W	MET13	-3.81825	-3.50943	0.39587	-0.0515988	-0.980709
YGL126W	SCS3	-4.22847	-3.92116	-1.61523	0.15044	-0.91027
YGL127C	SOH1	-4.45899	-4.01102	-1.70716	0.0843256	-1.01035
YGL128C	CWC23	-3.50223	-2.71212	-1.26623	0.063292	-0.360157
YGL129C	RSM23	-3.57297	-3.23895	-1.36684	-0.0326075	-0.534969
YGL130W	CEG1	-3.39866	-2.86641	-1.72632	0.16697	-0.291222
YGL131C	SNT2	-3.6998	-2.82995	-1.50015	0.250688	-0.202423
YGL133W	ITC1	-4.47285	-2.84156	-1.84868	0.0184746	-0.614722
YGL134W	PCL10	-4.21606	-3.33386	-2.08645	0.314736	-0.787607
YGL135W	RPL1B	-6.1495	-5.6967	-2.56513	0.301387	-1.68109
YGL136C	MRM2	-4.55131	-3.59412	-2.28754	0.216918	-0.555902
YGL137W	SEC27	-4.10275	-3.48021	-1.97022	0.384691	-0.892673
YGL138C	YGL138C	-3.33474	-3.11391	-1.53992	0.653803	-0.812638
YGL139W	FLC3	-3.36505	-2.48033	-1.36198	0.272338	-0.228263
YGL140C	YGL140C	-3.57803	-2.73383	-1.46101	0.110482	-0.537187
YGL141W	HUL5	-3.76384	-2.99748	-1.50105	0.117766	-0.50267
YGL142C	GPI10	-3.53168	-2.83758	-1.36395	0.0643069	-0.392338
YGL143C	MRF1	-3.12788	-2.45254	-1.58915	0.227569	-0.584436
YGL144C	ROG1	-3.04746	-2.76984	-1.64588	0.129342	-0.299293
YGL145W	TIP20	-3.28352	-2.7497	-1.64892	-0.0399436	-0.397038
YGL146C	RRT6	-4.21339	-3.73631	-1.56187	0.0699999	-1.13224
YGL147C	RPL9A	-6.27515	-5.96426	-3.16185	0.295249	-1.97985
YGL148W	ARO2	-4.81547	-4.19459	-1.21046	0.113069	-1.01674
YGL150C	INO80	-5.00924	-3.61421	-1.78088	0.206066	-0.663715
YGL151W	NUT1	-3.33431	-2.48329	-1.57648	0.297584	-0.576725
YGL153W	PEX14	-3.64911	-2.49645	-1.30273	-0.0442849	-0.444358
YGL154C	LYS5	-3.43832	-2.54291	-1.15017	0.117936	-0.454766
YGL155W	CDC43	-3.58196	-3.22195	-1.31619	-0.0387184	-0.769487
YGL156W	AMS1	-3.20397	-2.39745	-1.09712	0.236379	-0.122167
YGL157W	ARI1	-4.35233	-3.90848	-2.26	0.418997	-1.26469
YGL158W	RCK1	-2.674	-3.09587	-1.98726	0.263699	-0.720027
YGL159W	YGL159W	-3.86662	-2.92383	-1.6828	0.139543	-0.576461
YGL160W	AIM14	-3.30763	-2.39555	-1.17609	0.123671	-0.46668
YGL161C	YIP5	-3.11522	-2.60648	-1.39233	0.162259	-0.465245
YGL162W	SUT1	-5.44193	-4.7416	-1.63231	0.133571	-1.48979
YGL163C	RAD54	-3.12919	-2.98114	-0.730183	0.0417473	-0.845779
YGL164C	YRB30	-3.42843	-3.02079	-1.45537	0.127318	-0.539587
YGL166W	CUP2	-3.26229	-3.05466	-1.55714	0.201787	-0.503707
YGL167C	PMR1	-4.52041	-3.88334	-1.81594	0.122524	-0.959743
YGL168W	HUR1	-2.74588	-1.94798	-1.96679	0.560199	-0.563783
YGL169W	SUA5	-3.83092	-3.68712	-1.90693	0.256155	-0.445423
YGL170C	SPO74	-2.77444	-2.42471	-1.95654	0.384999	-0.0673515
YGL171W	ROK1	-5.02916	-3.70376	-1.90739	0.607505	-0.907305
YGL172W	NUP49	-3.5091	-3.18589	-1.57071	0.0792334	-0.694783
YGL173C	XRN1	-4.22031	-3.23582	-1.98461	0.447415	-1.16134
YGL174W	BUD13	-3.74261	-2.67366	-1.70872	0.210121	-0.573383
YGL175C	SAE2	-3.45362	-2.75168	-1.62311	0.323174	-0.599474
YGL176C	YGL176C	-3.93696	-3.21376	-2.01814	0.372967	-0.667104
YGL178W	MPT5	-4.71039	-3.95257	-1.65546	0.237863	-1.26574
YGL179C	TOS3	-4.02493	-3.57946	-1.60016	0.129355	-1.13748
YGL180W	ATG1	-4.24972	-2.80927	-0.912445	0.0582385	-1.04889
YGL181W	GTS1	-4.26672	-3.7903	-1.39998	0.300035	-1.13978
YGL183C	MND1	-3.69232	-2.9735	-1.06684	0.105654	-0.844639
YGL184C	STR3	-3.27112	-3.08196	-0.12325	0.178677	-0.690614
YGL185C	YGL185C	-3.70735	-2.96664	-1.13326	0.121044	-0.581081
YGL186C	TPN1	-4.40048	-3.63799	-1.63973	0.118738	-1.02936
YGL187C	COX4	-4.18103	-3.44615	-1.69063	0.0659097	-0.891344
YGL188C-A	YGL188C-A	-6.33405	-6.32693	-2.90919	0.150626	-1.84362
YGL189C	RPS26A	-5.90404	-5.3988	-2.94135	0.140273	-1.40984
YGL190C	CDC55	-5.57935	-4.70645	-2.30018	-0.129906	-1.87768
YGL191W	COX13	-3.77731	-3.21281	-1.58162	0.235642	-0.679981
YGL192W	IME4	-2.88237	-2.44353	-1.95245	0.807604	0.0545736
YGL193C	YGL193C	-2.71983	-2.30724	-1.87932	0.862253	0.146493
YGL194C	HOS2	-3.82334	-2.99126	-1.83453	0.0189295	-0.40667
YGL194C-A	YGL194C-A	-4.13714	-3.21615	-2.41779	0.456517	-0.581134
[truncated: 3,886 more rows]
